# Supplementary material
Source: PubMed Central journal article supplement (PMC5396026)

**100-00-5 : 1-Chloro-4-nitrobenzene**

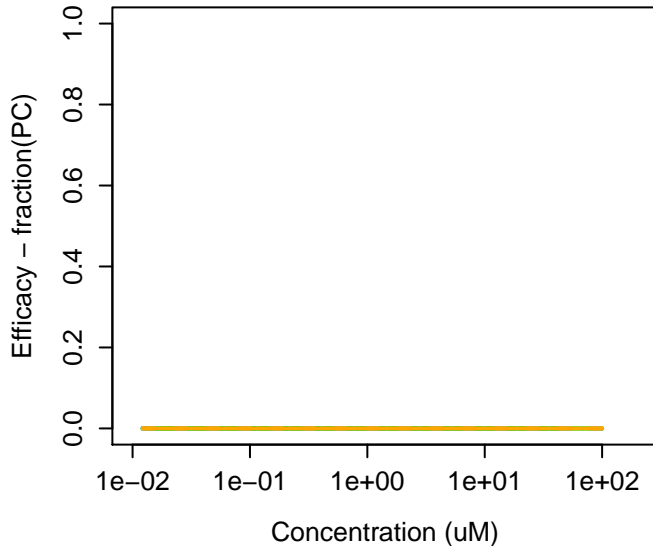

**100-00-5 : 1-Chloro-4-nitrobenzene**  
Agonist: 0 Antagonist: 0

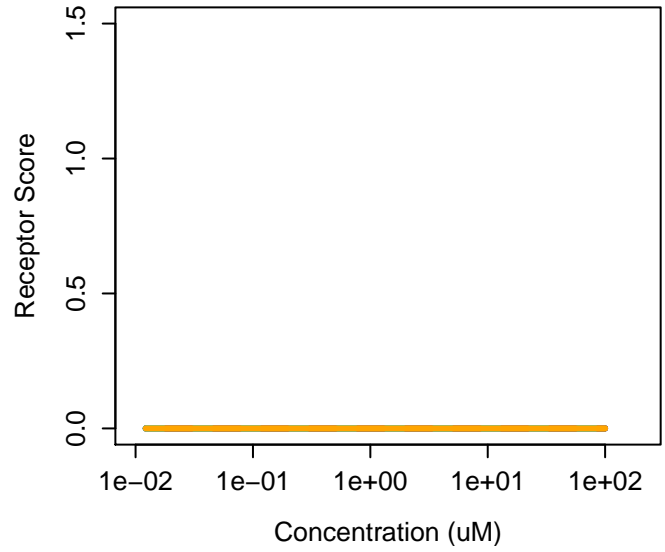

**100-01-6 : 4-Nitroaniline**

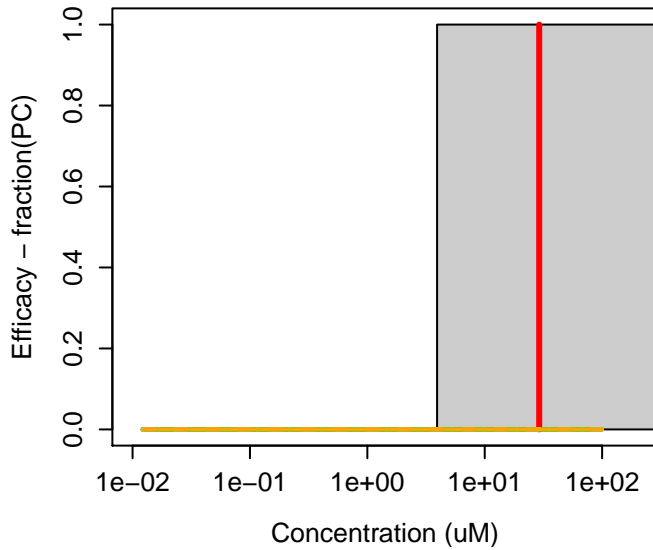

**100-01-6 : 4-Nitroaniline**  
Agonist: 0 Antagonist: 0

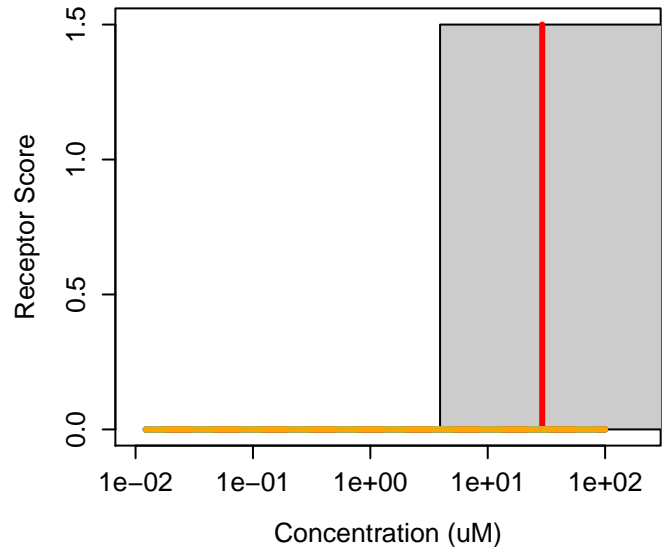

**100-02-7 : 4-Nitrophenol**

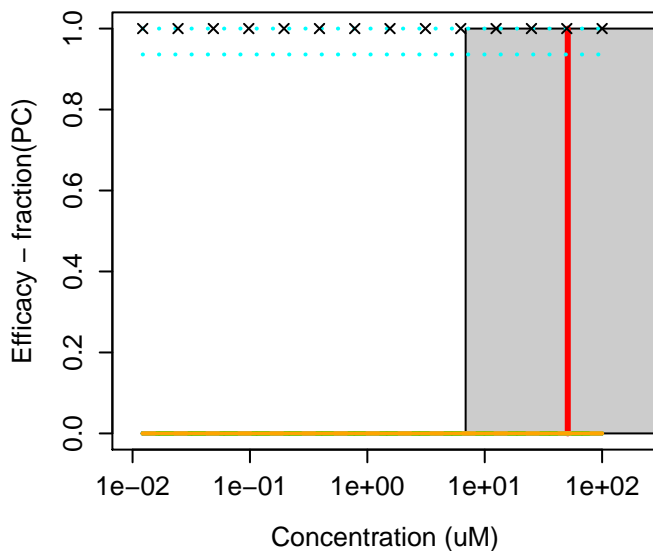

**100-02-7 : 4-Nitrophenol**  
Agonist: 0 Antagonist: 0

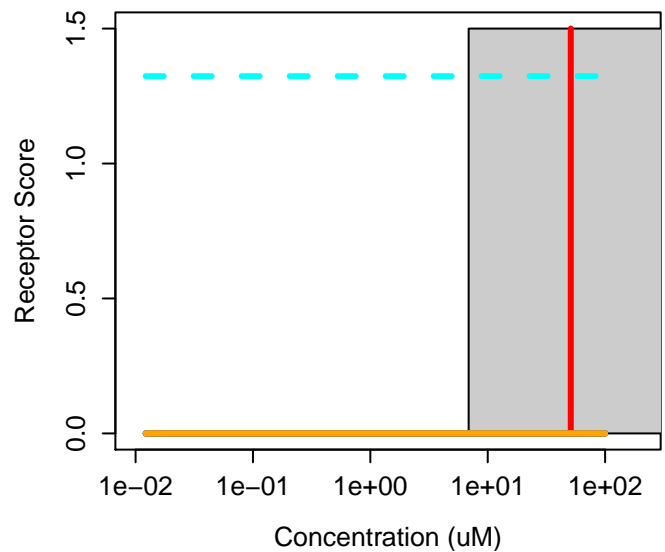

10016-20-3 : alpha-Cyclodextrin

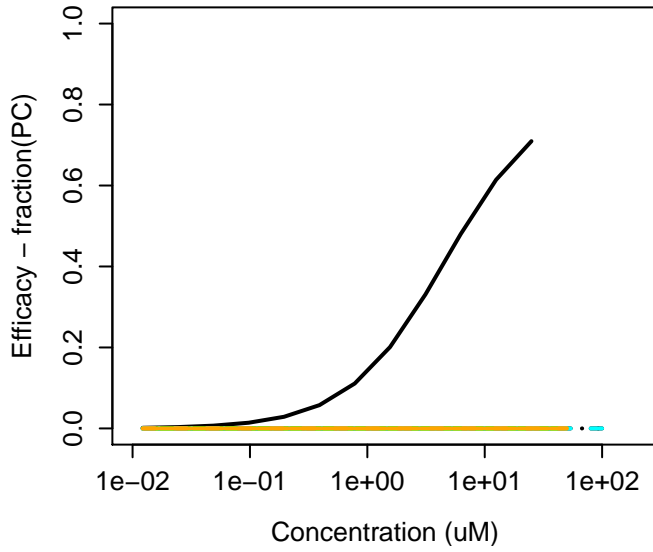

10016-20-3 : alpha-Cyclodextrin  
Agonist: 0 Antagonist: 0

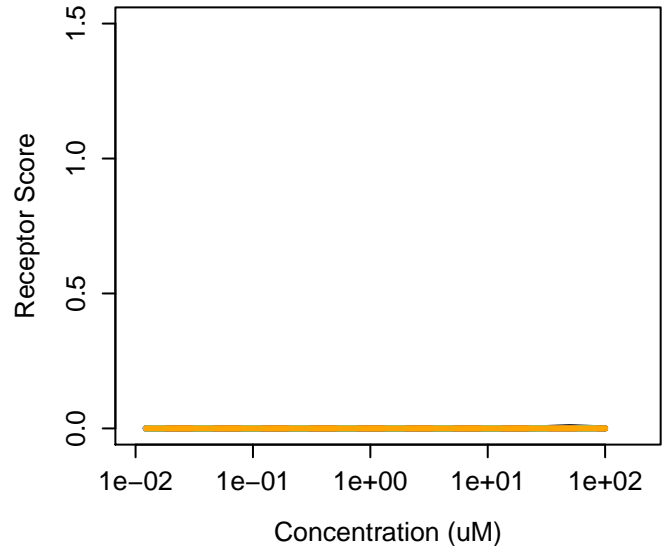

100-21-0 : Terephthalic acid

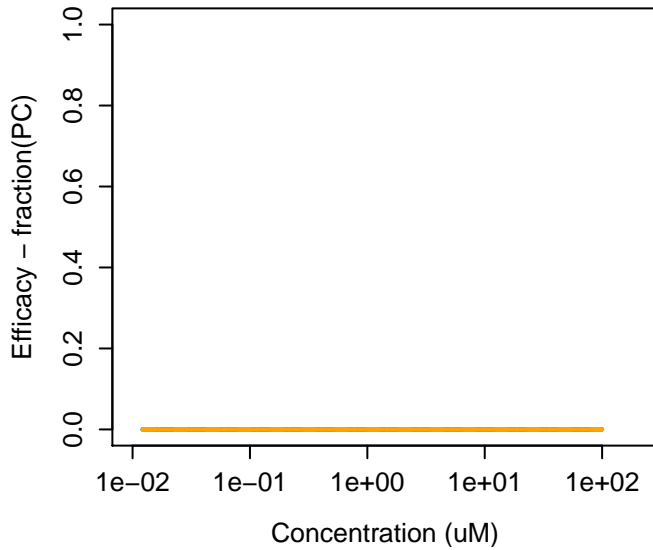

100-21-0 : Terephthalic acid  
Agonist: 0 Antagonist: 0

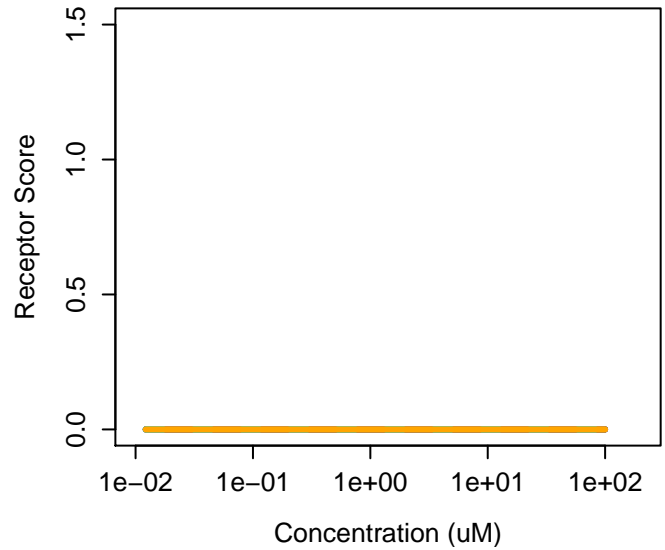

10025-74-8 : Dysprosium(III) chloride

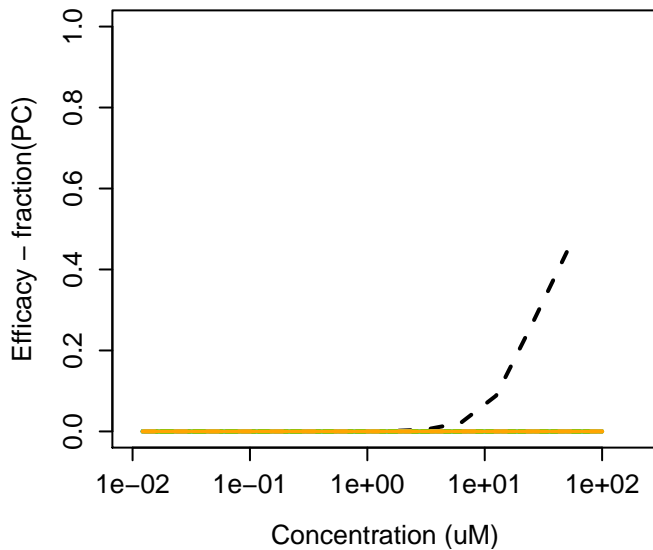

10025-74-8 : Dysprosium(III) chloride  
Agonist: 0 Antagonist: 0

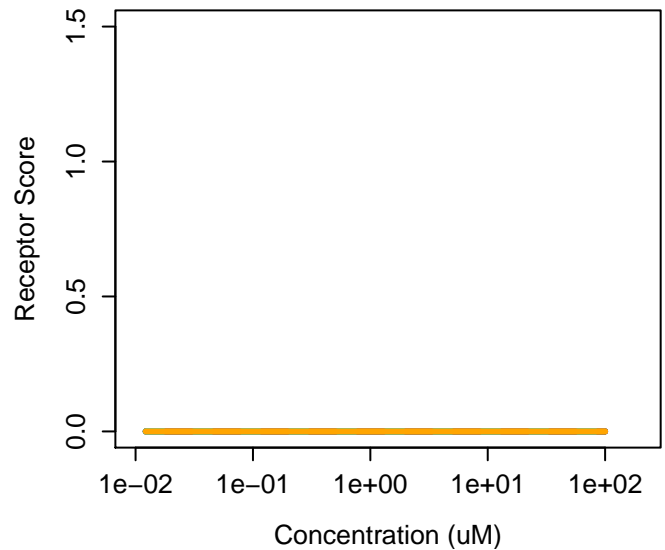

**100-37-8 : N,N-Diethylethanolamine**

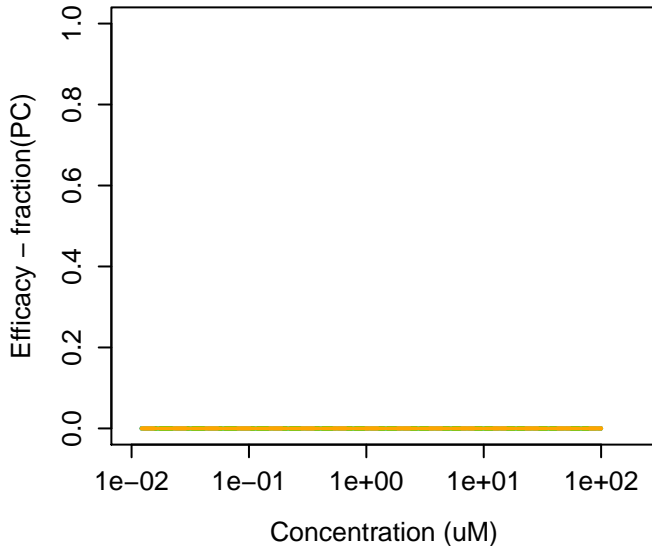

**100-37-8 : N,N-Diethylethanolamine  
Agonist: 0 Antagonist: 0**

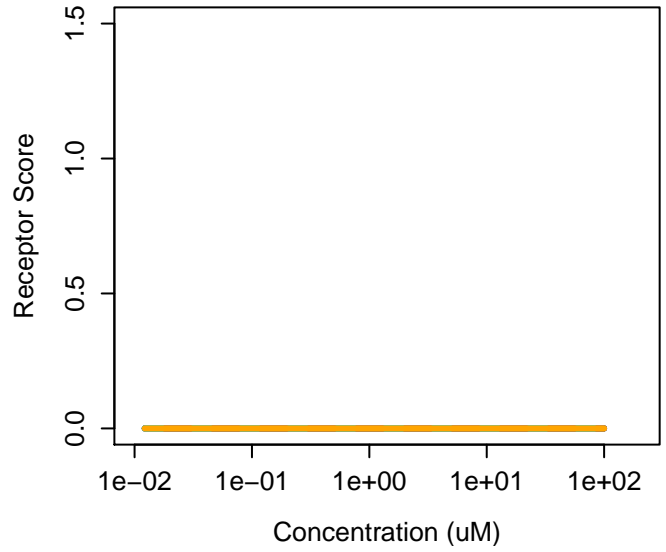

**10042-59-8 : 2-Propyl-1-heptanol**

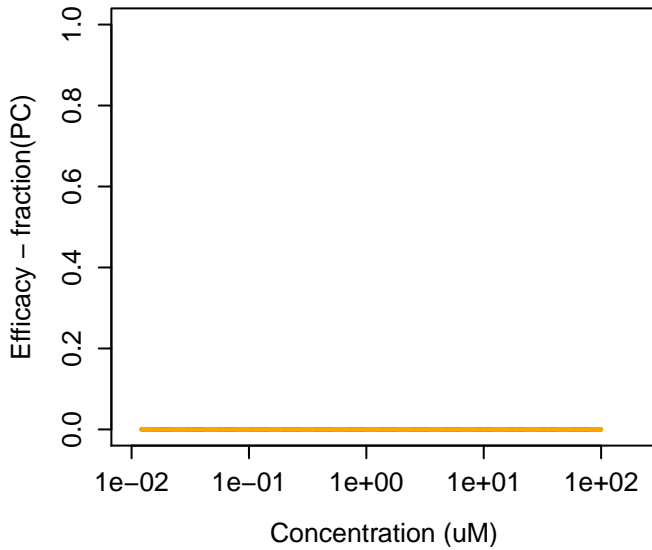

**10042-59-8 : 2-Propyl-1-heptanol  
Agonist: 0 Antagonist: 0**

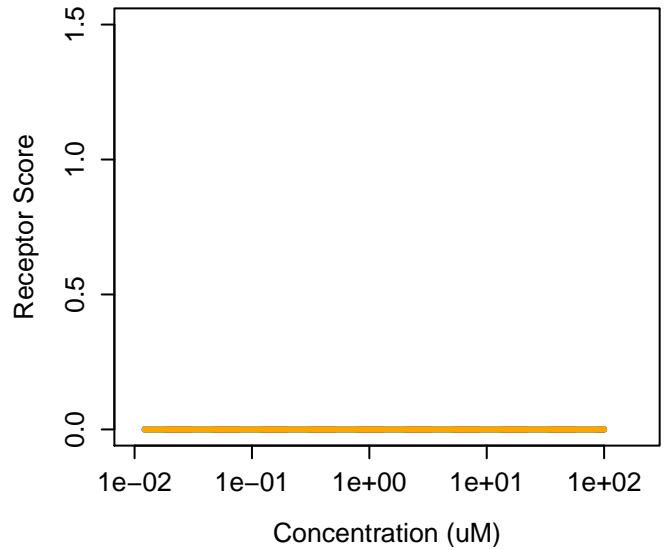

**10043-35-3 : Boric acid**

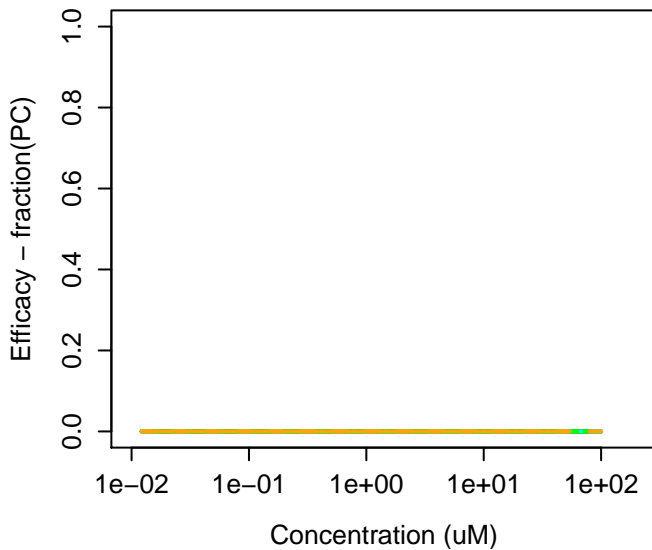

**10043-35-3 : Boric acid  
Agonist: 0 Antagonist: 0**

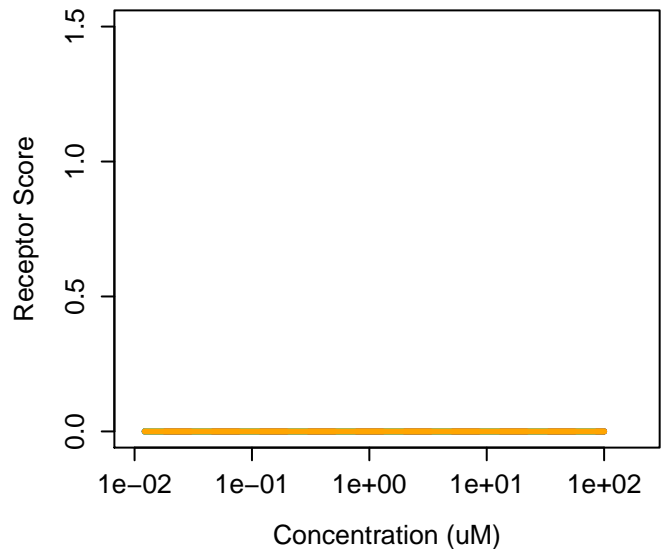

100-51-6 : Benzyl alcohol

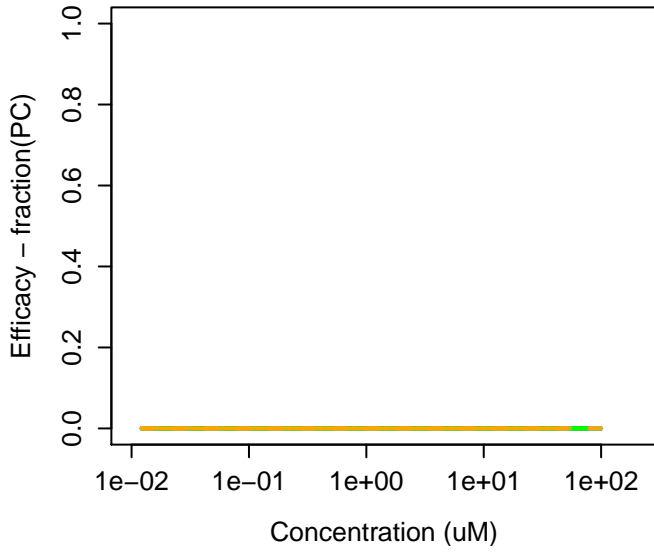

100-51-6 : Benzyl alcohol  
Agonist: 0 Antagonist: 0



100-54-9 : 3-Pyridinecarbonitrile

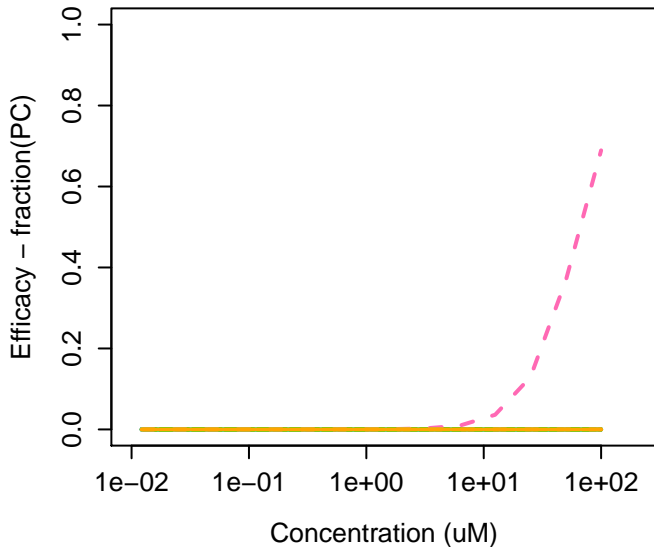

100-54-9 : 3-Pyridinecarbonitrile  
Agonist: 0 Antagonist: 0

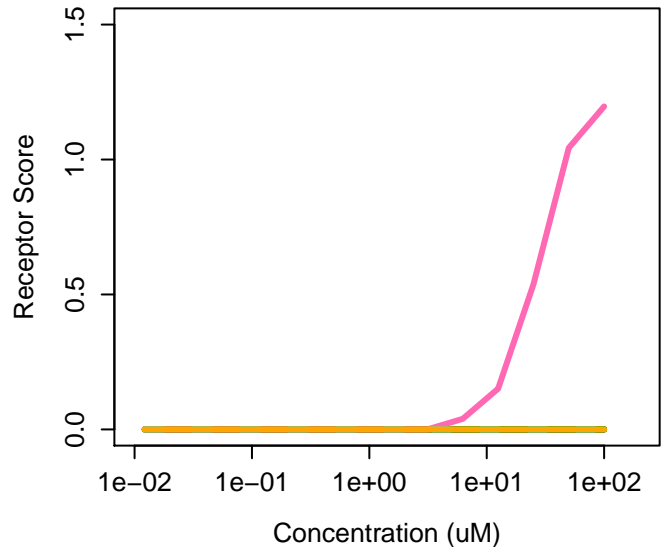

100-64-1 : Cyclohexanone oxime

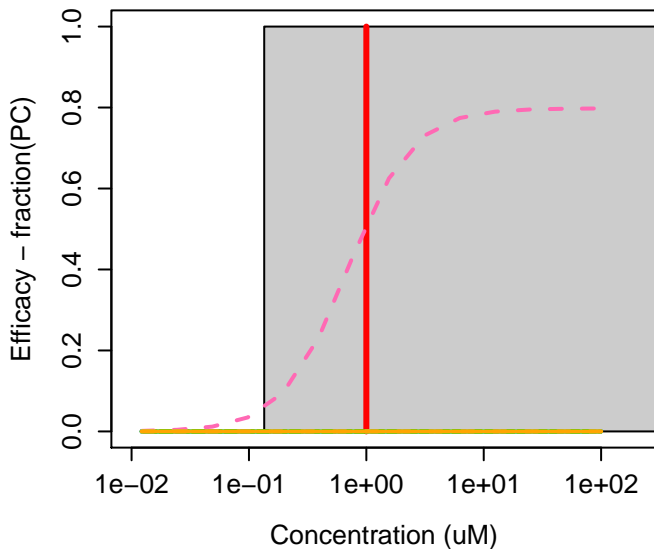

100-64-1 : Cyclohexanone oxime  
Agonist: 0 Antagonist: 0

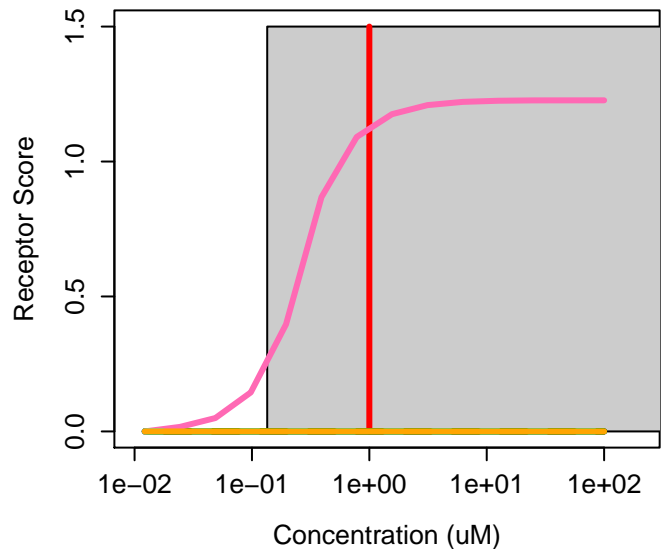



10094-34-5 : 1,1-Dimethyl-2-phenylethyl butanoate

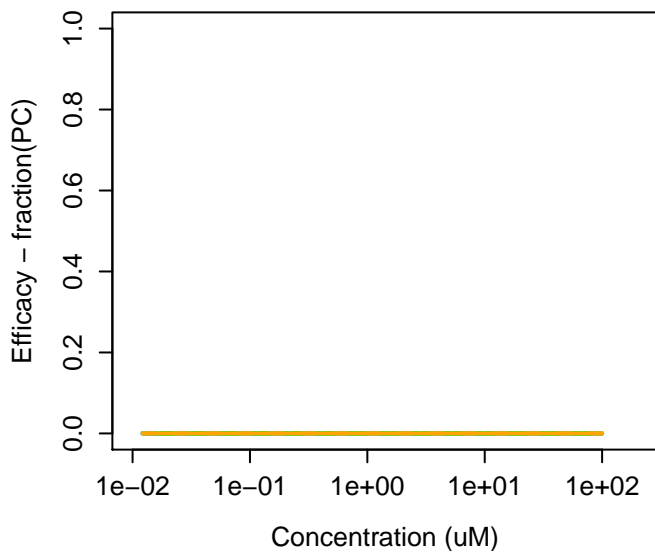

10094-34-5 : 1,1-Dimethyl-2-phenylethyl butanoate  
Agonist: 0 Antagonist: 0

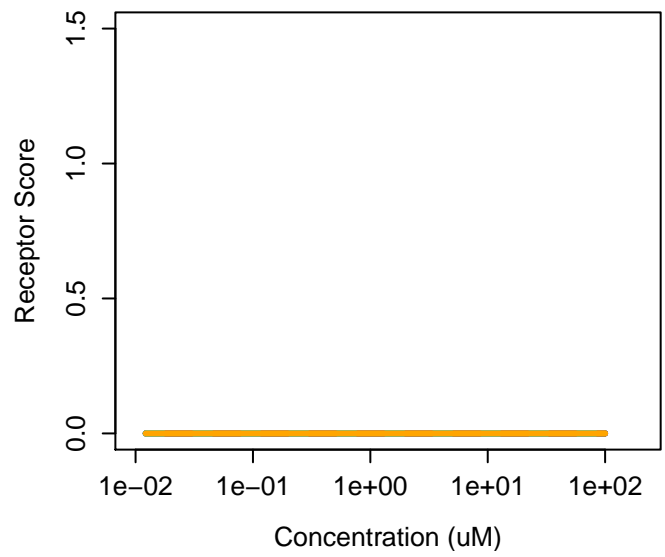

100-97-0 : Methenamine

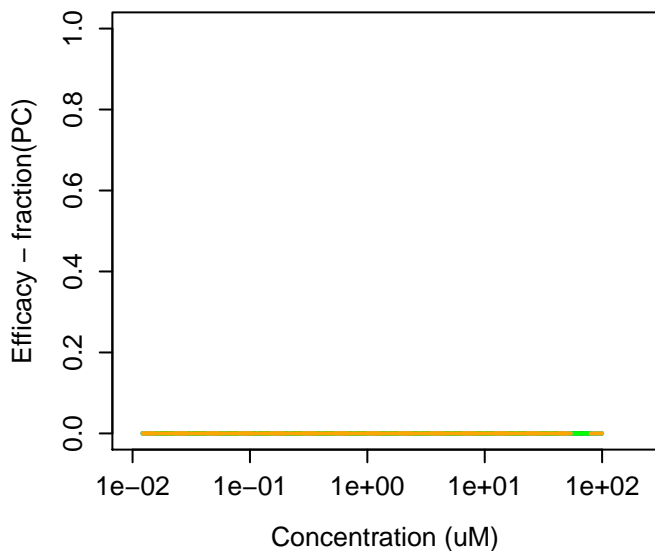

100-97-0 : Methenamine  
Agonist: 0 Antagonist: 0

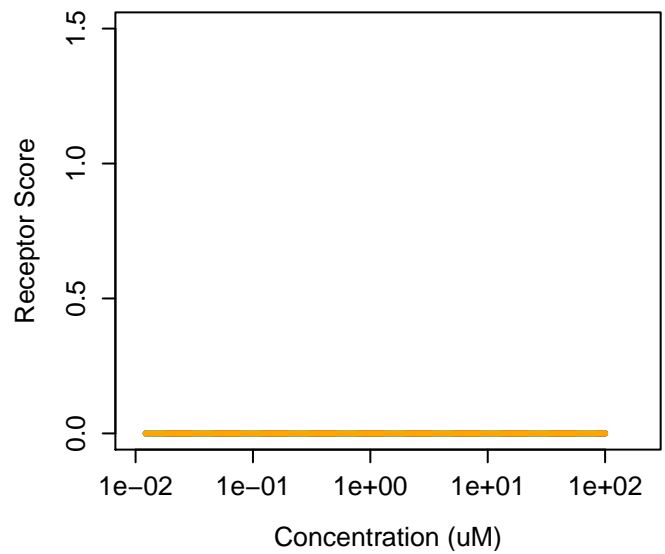

101-02-0 : Triphenyl phosphite

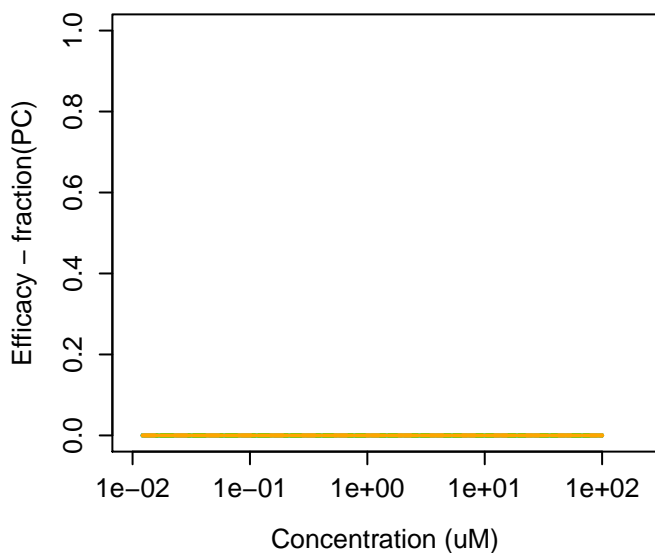

101-02-0 : Triphenyl phosphite  
Agonist: 0 Antagonist: 0

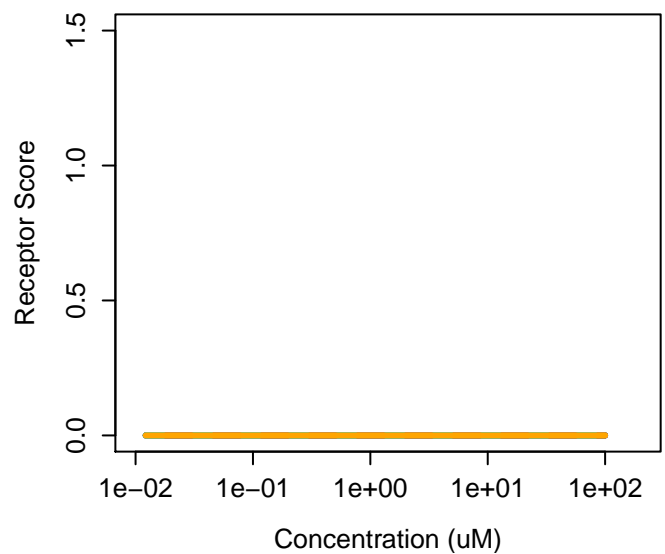

101-05-3 : Anilazine

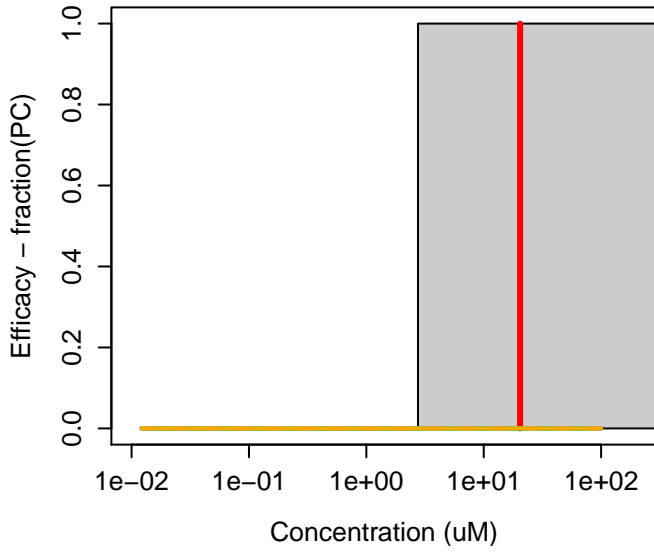

101-05-3 : Anilazine  
Agonist: 0 Antagonist: 0

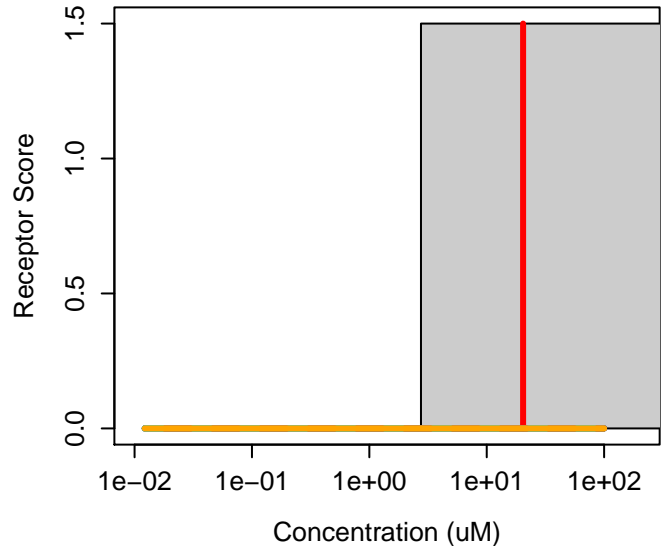

101-10-0 : Cloprop

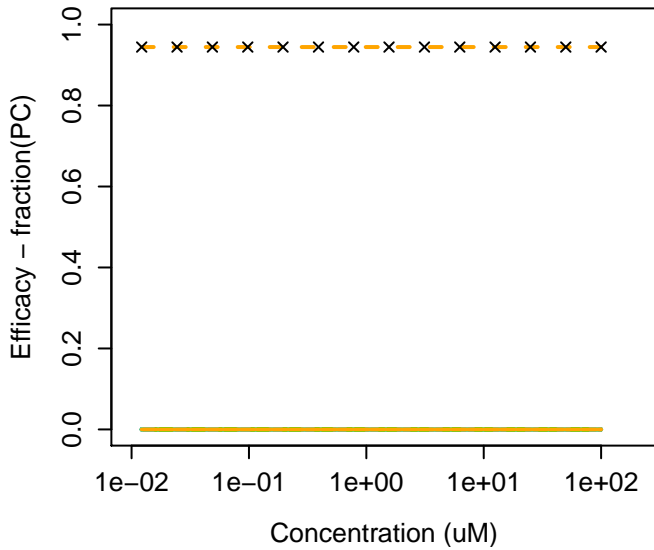

101-10-0 : Cloprop  
Agonist: 0 Antagonist: 0



101-20-2 : Triclocarban

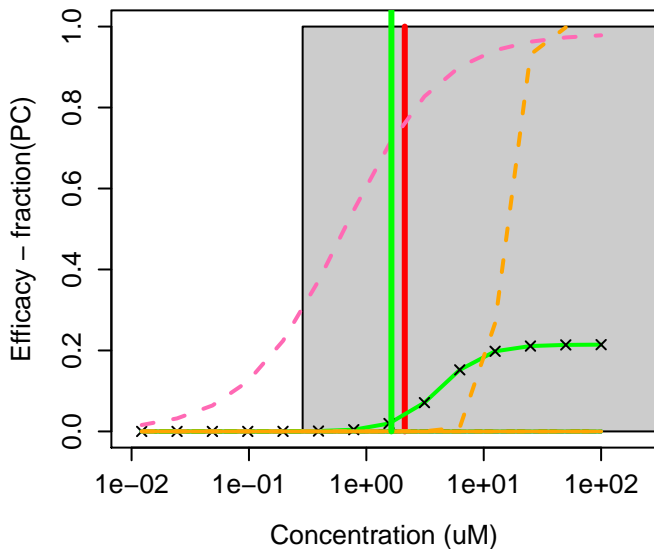

101-20-2 : Triclocarban  
Agonist: 0.019 Antagonist: 0.025

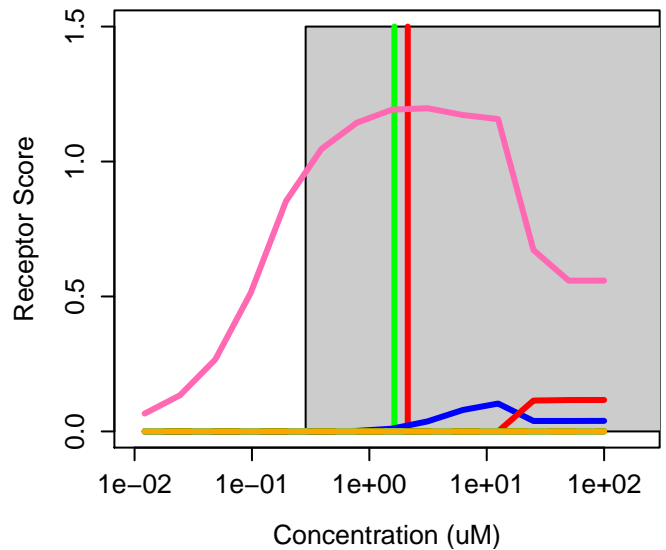

101-21-3 : Chlorpropham

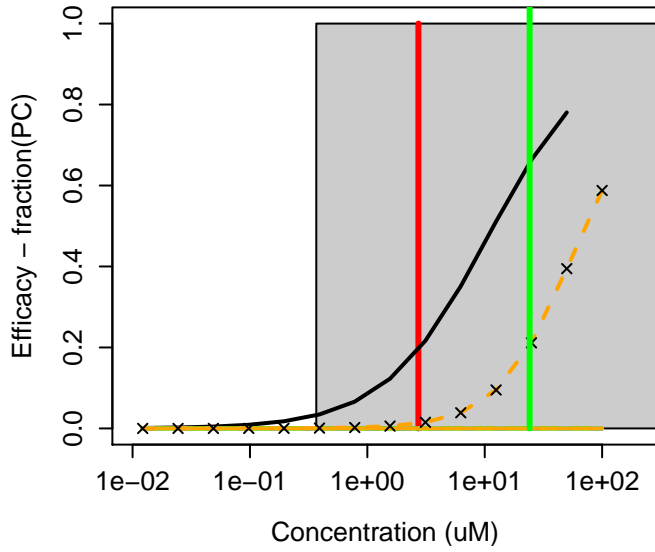

101-21-3 : Chlorpropham  
Agonist: 0 Antagonist: 0.067

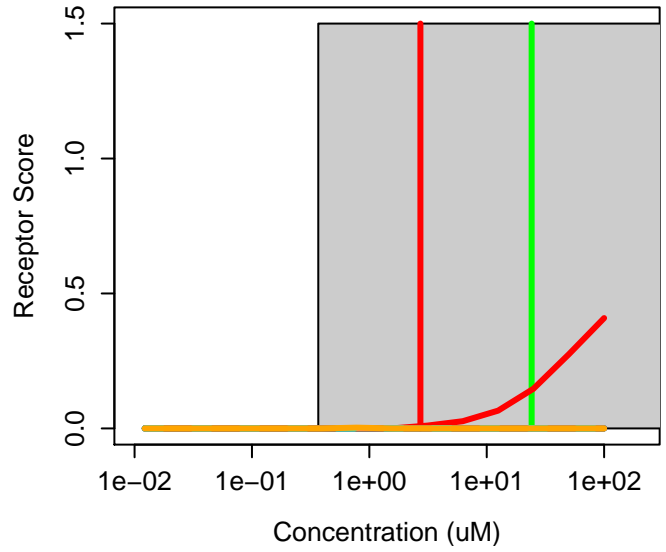

101-37-1 : 2,4,6-Tris(allyloxy)-1,3,5-triazine

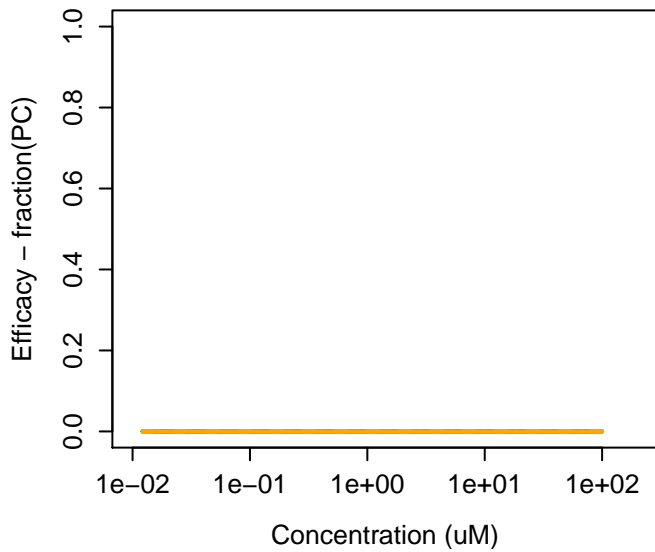

101-37-1 : 2,4,6-Tris(allyloxy)-1,3,5-triazine  
Agonist: 0 Antagonist: 0

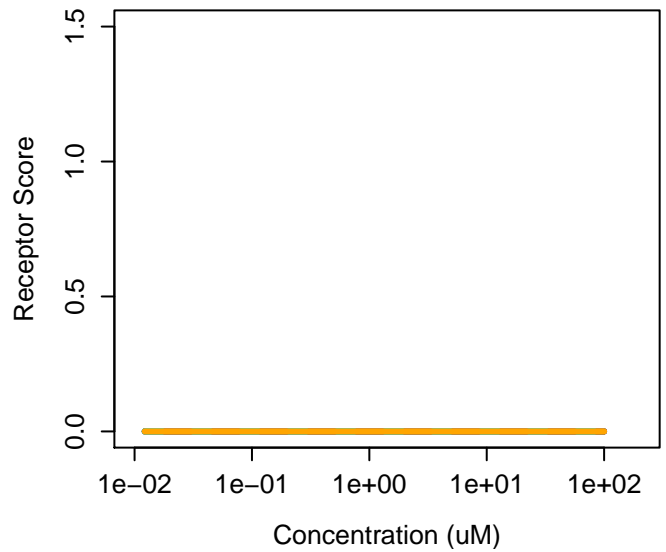

101-42-8 : Fenuron



101-42-8 : Fenuron  
Agonist: 0 Antagonist: 0

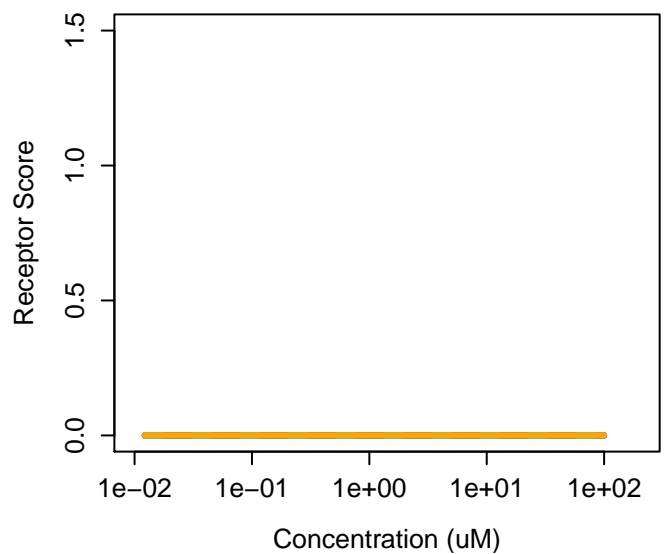



101463-69-8 : Flufenoxuron

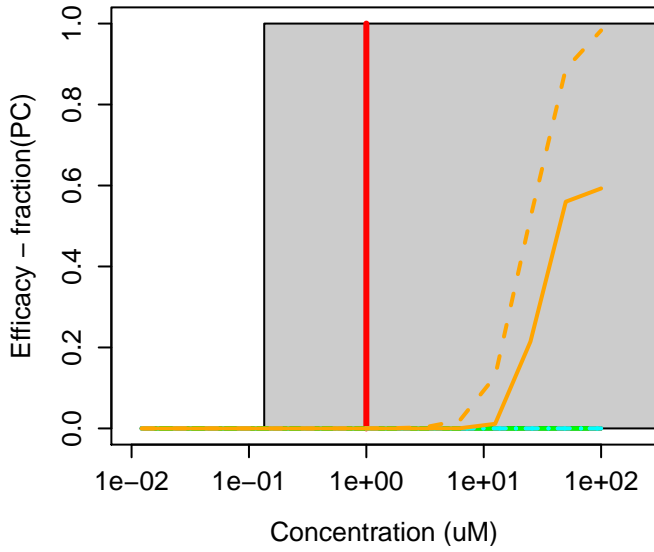

101463-69-8 : Flufenoxuron  
Agonist: 0 Antagonist: 0

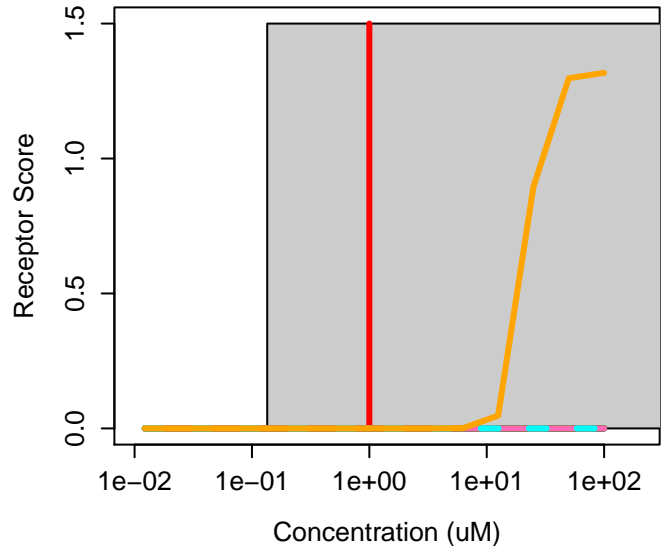

101-54-2 : N-Phenyl-1,4-benzenediamine

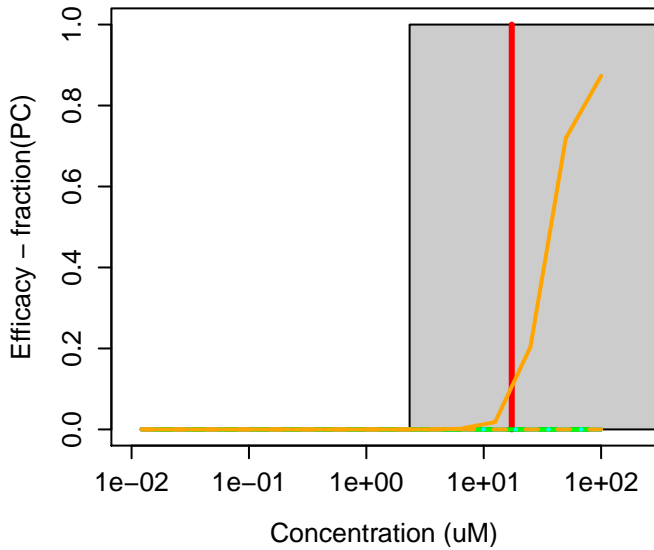

101-54-2 : N-Phenyl-1,4-benzenediamine  
Agonist: 0 Antagonist: 0

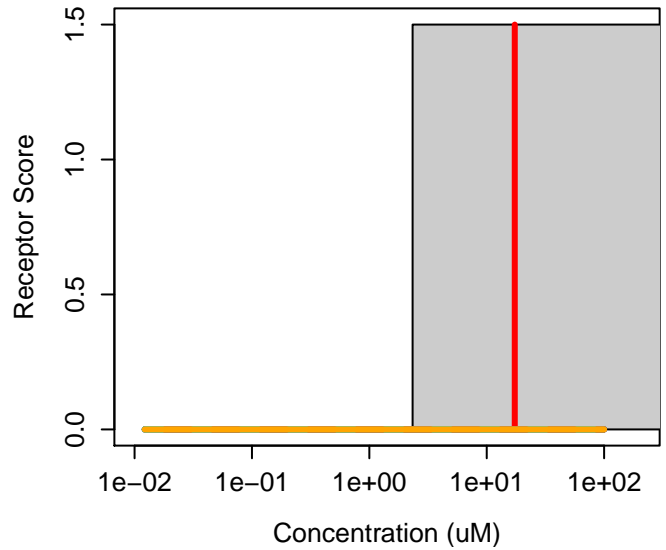

101-55-3 : p-Bromodiphenyl ether

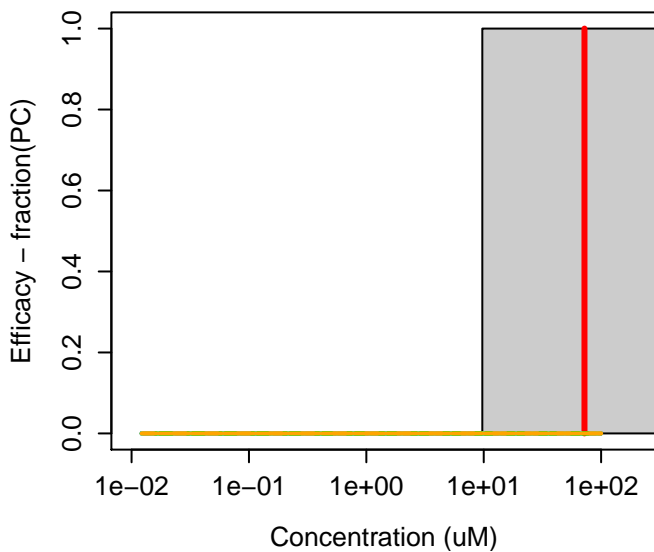

101-55-3 : p-Bromodiphenyl ether  
Agonist: 0 Antagonist: 0

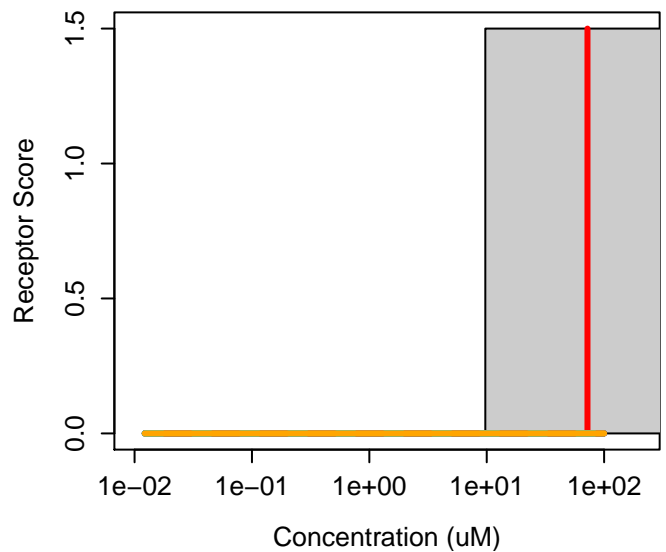

101-61-1 : 4,4'-Methylenebis(N,N-dimethylanilin

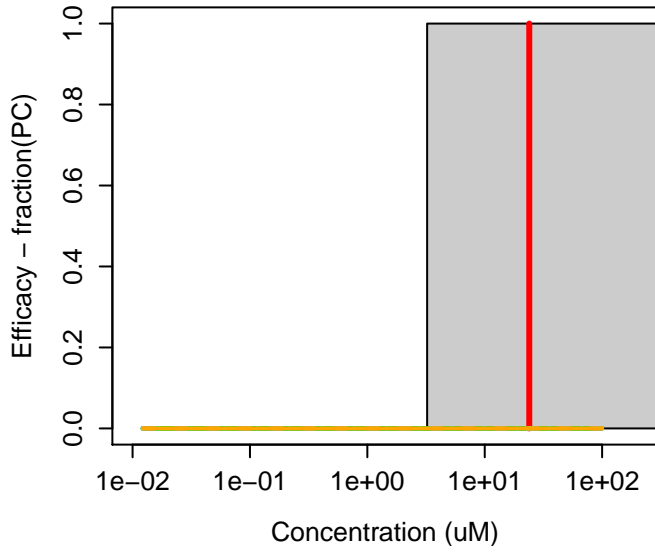

101-61-1 : 4,4'-Methylenebis(N,N-dimethylanilin  
Agonist: 0 Antagonist: 0

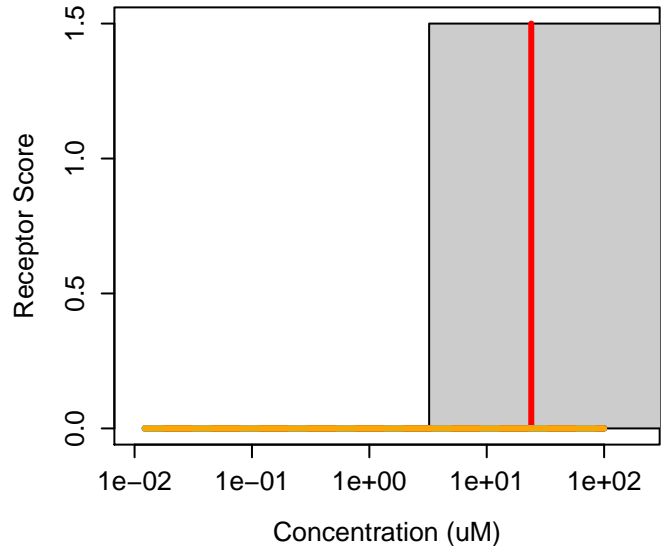

10161-33-8 : 17beta-Trenbolone

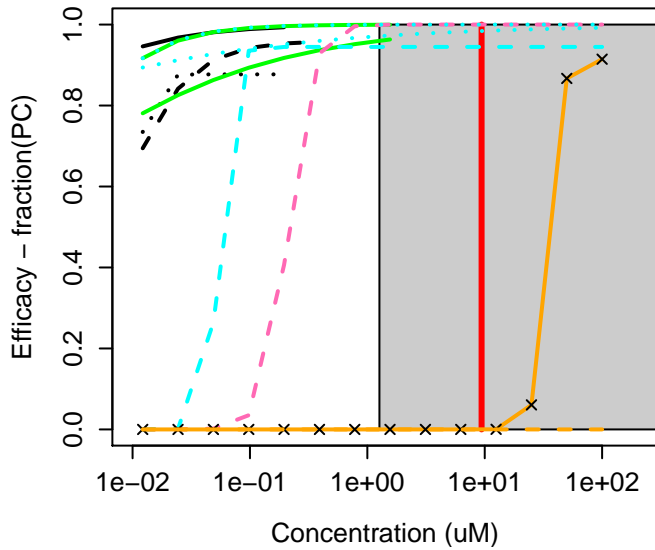

10161-33-8 : 17beta-Trenbolone  
Agonist: 1.6 Antagonist: 0

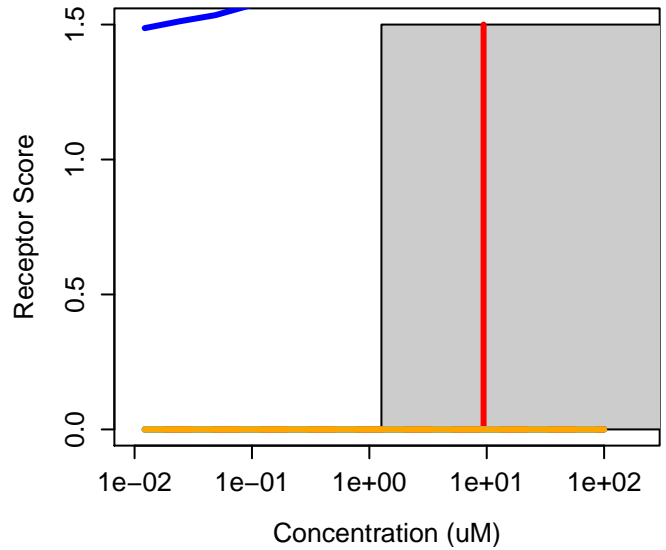

101-77-9 : 4,4'-Methylenedianiline

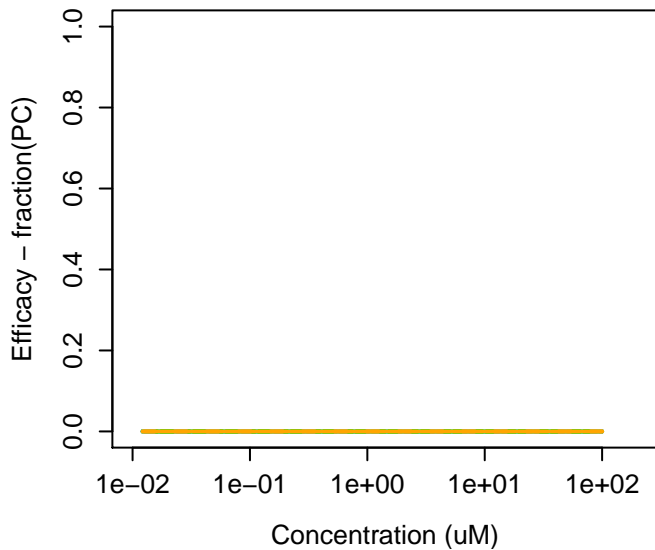

101-77-9 : 4,4'-Methylenedianiline  
Agonist: 0 Antagonist: 0



**101-80-4 : 4,4'-Oxydianiline**

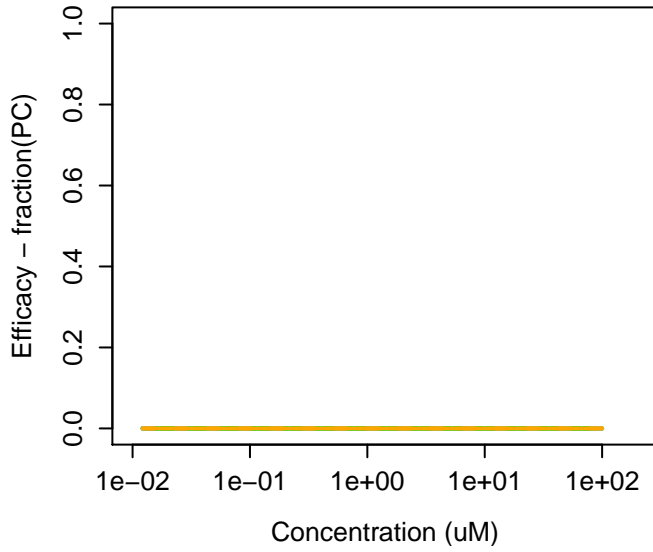

**101-80-4 : 4,4'-Oxydianiline  
Agonist: 0 Antagonist: 0**



**101-81-5 : Diphenylmethane**



**101-81-5 : Diphenylmethane  
Agonist: 0 Antagonist: 0**



**101-83-7 : Dicyclohexylamine**

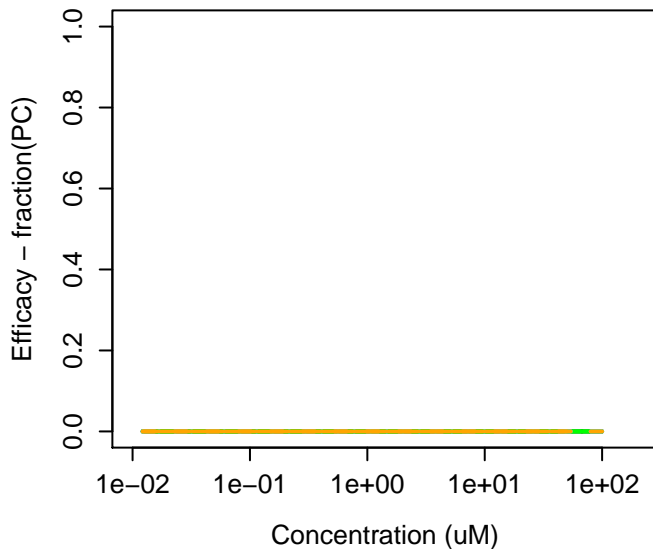

**101-83-7 : Dicyclohexylamine  
Agonist: 0 Antagonist: 0**



101-84-8 : Diphenyl oxide

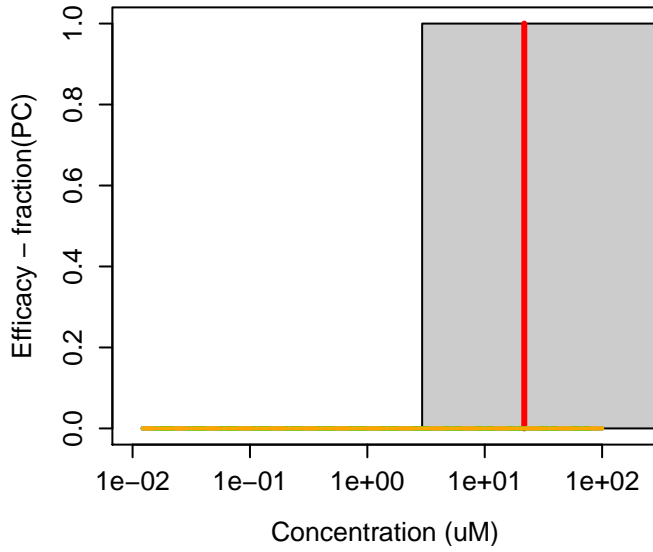

101-84-8 : Diphenyl oxide  
Agonist: 0 Antagonist: 0

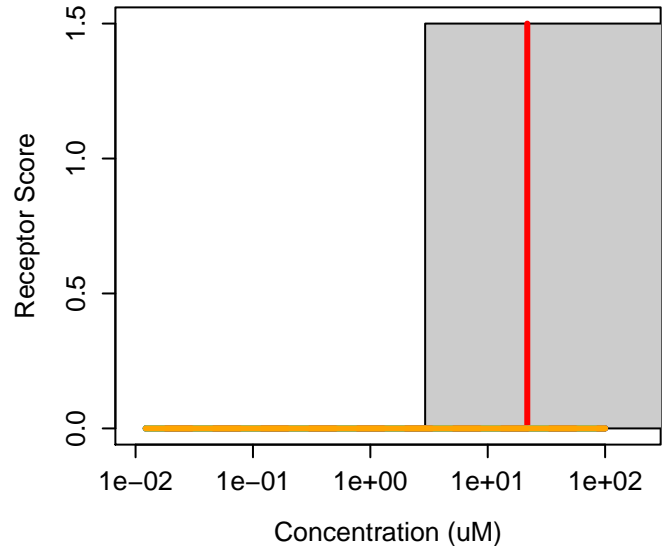

101-86-0 : 2-Benzylideneoctanal

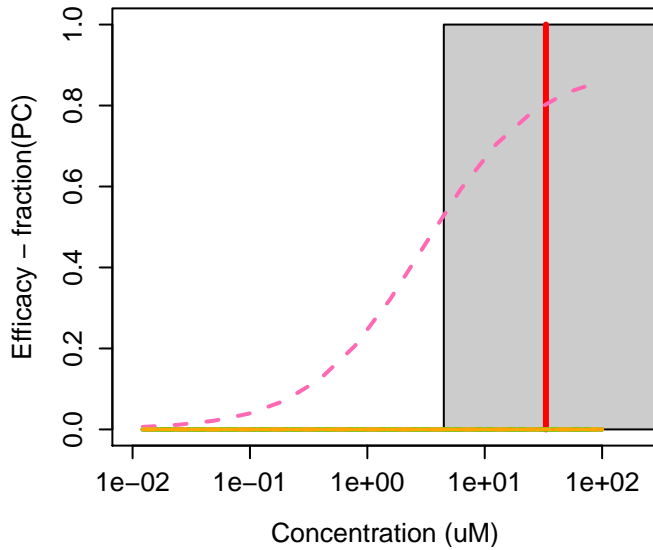

101-86-0 : 2-Benzylideneoctanal  
Agonist: 0 Antagonist: 0

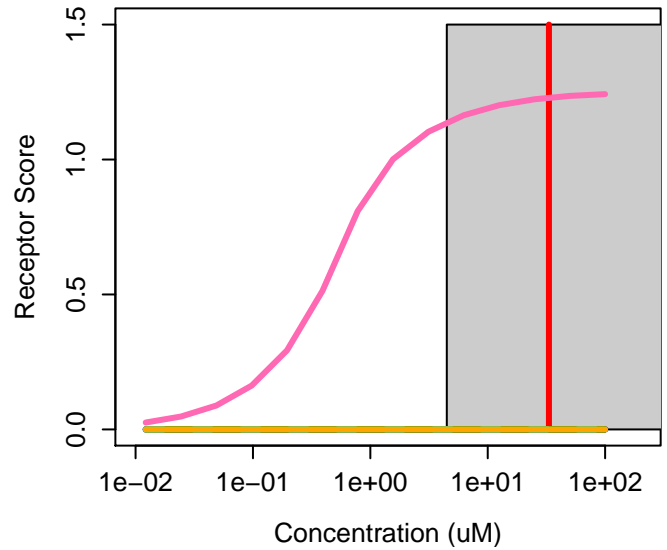

102-06-7 : 1,3-Diphenylguanidine

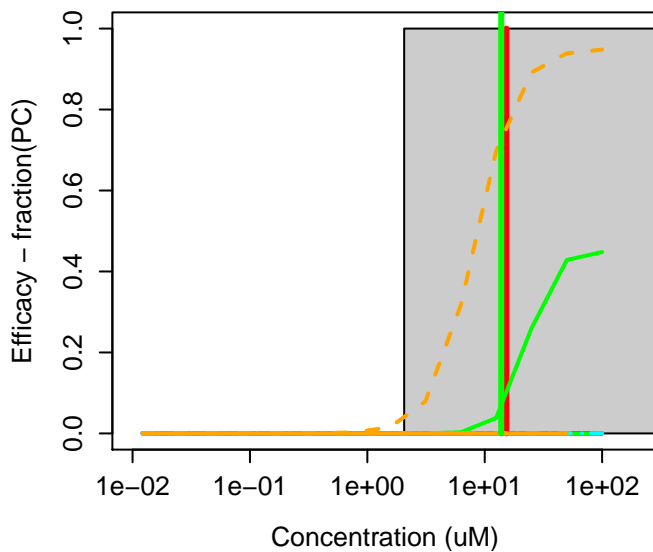

102-06-7 : 1,3-Diphenylguanidine  
Agonist: 0 Antagonist: 0.058

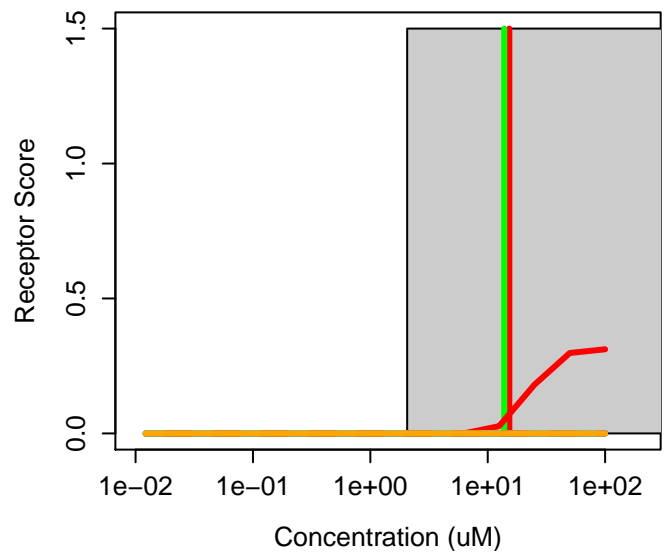

10222-01-2 : 2,2-Dibromo-3-nitrilopropionamid

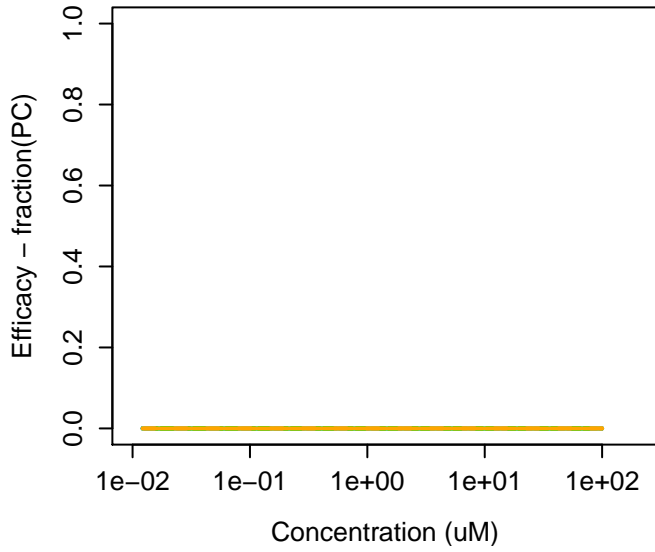

10222-01-2 : 2,2-Dibromo-3-nitrilopropionamid  
Agonist: 0 Antagonist: 0

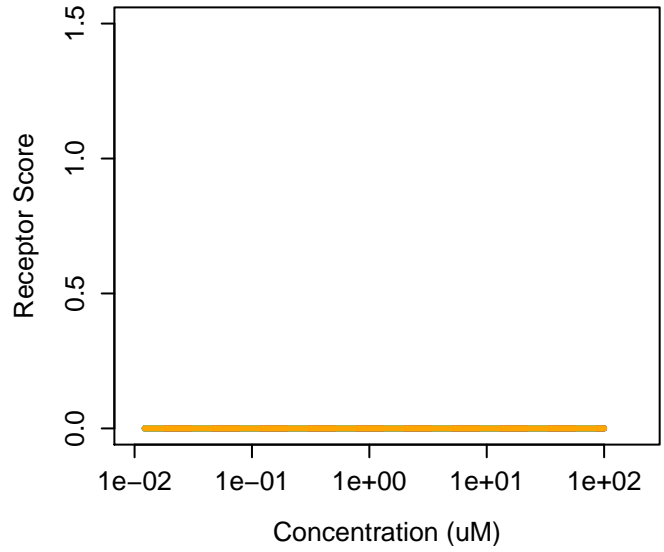

102-27-2 : N-Ethyl-3-methylaniline

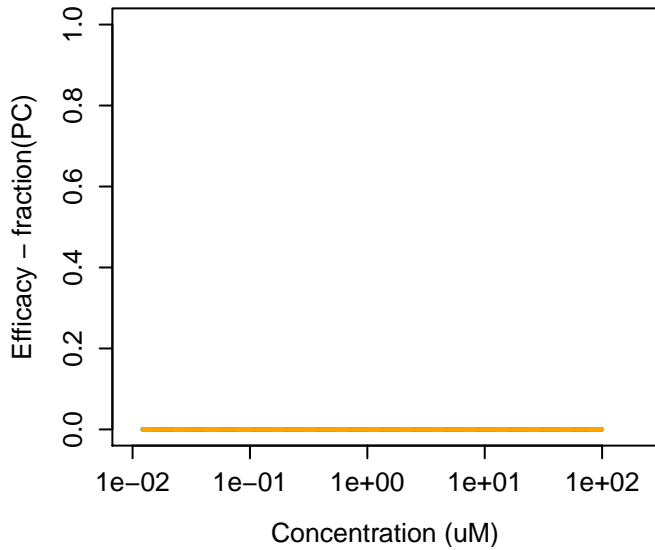

102-27-2 : N-Ethyl-3-methylaniline  
Agonist: 0 Antagonist: 0

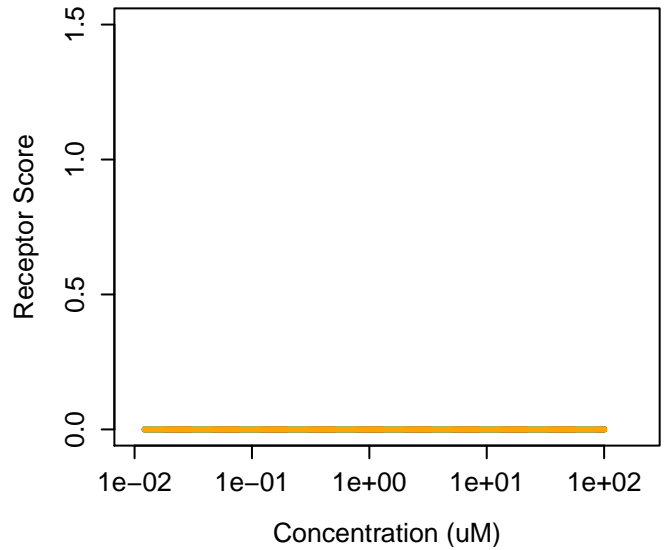

1024-57-3 : Heptachlor epoxide

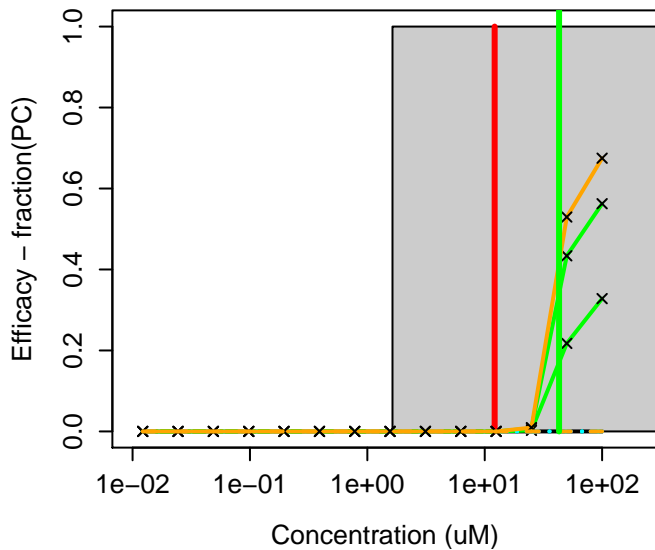

1024-57-3 : Heptachlor epoxide  
Agonist: 0 Antagonist: 0.06

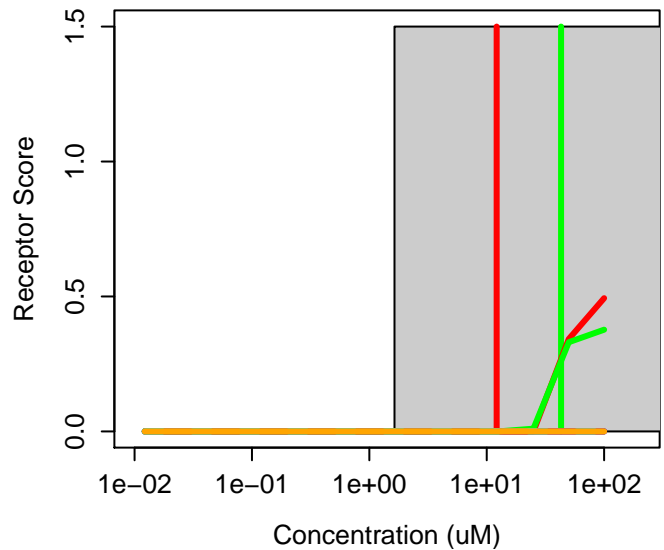

1-60-3 : N,N,N',N'-Tetrakis(2-Hydroxypropyl)ethylene-60-3 : N,N,N',N'-Tetrakis(2-Hydroxypropyl)ethylene  
Agonist: 0 Antagonist: 0

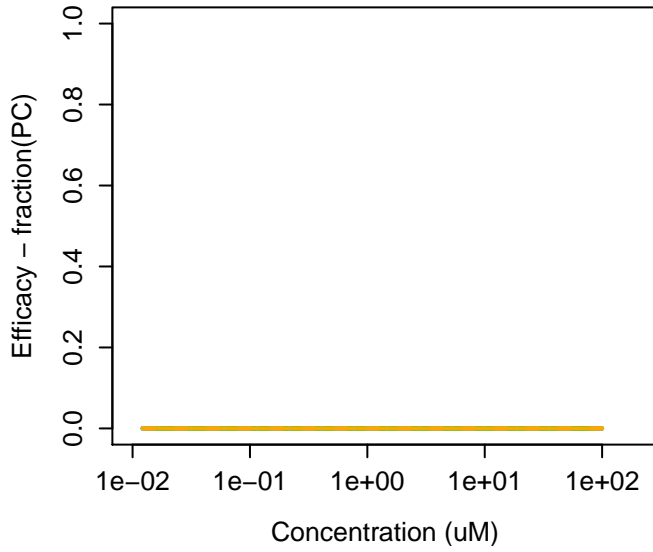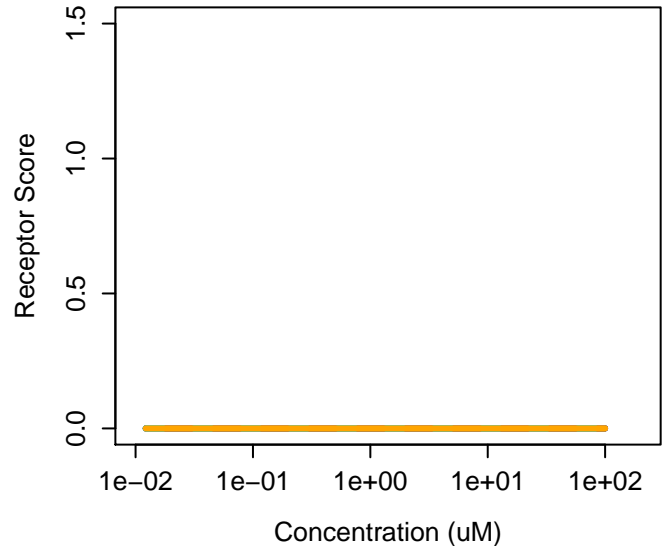

10265-92-6 : Methamidophos

10265-92-6 : Methamidophos  
Agonist: 0 Antagonist: 0

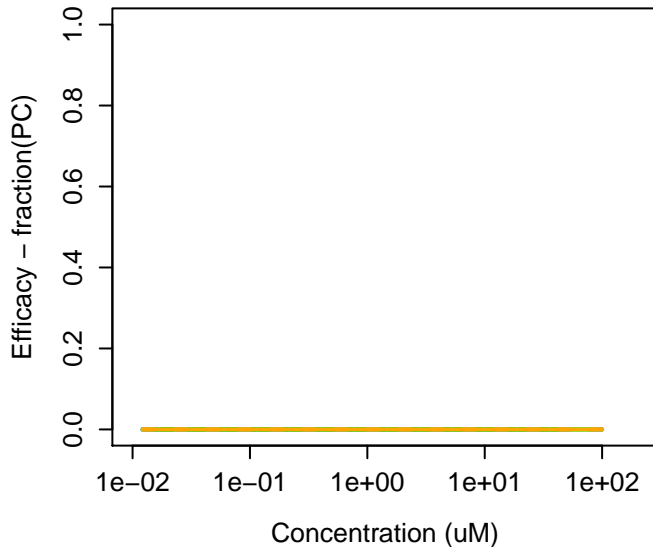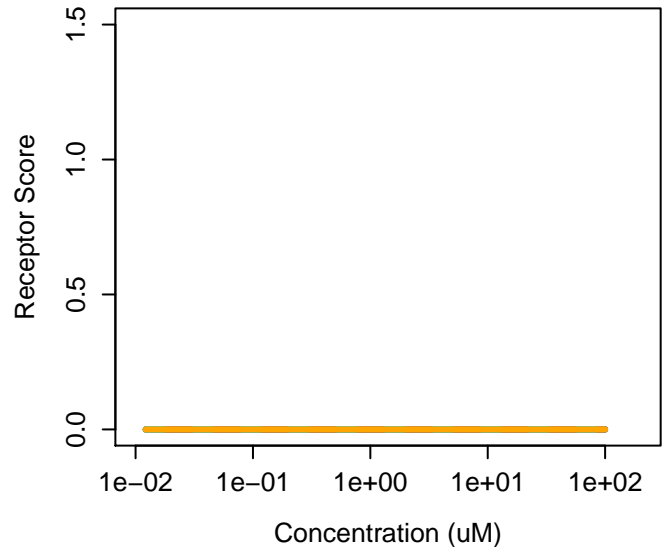

102676-31-3 : Fadrozole hydrochloride

102676-31-3 : Fadrozole hydrochloride  
Agonist: 0 Antagonist: 0

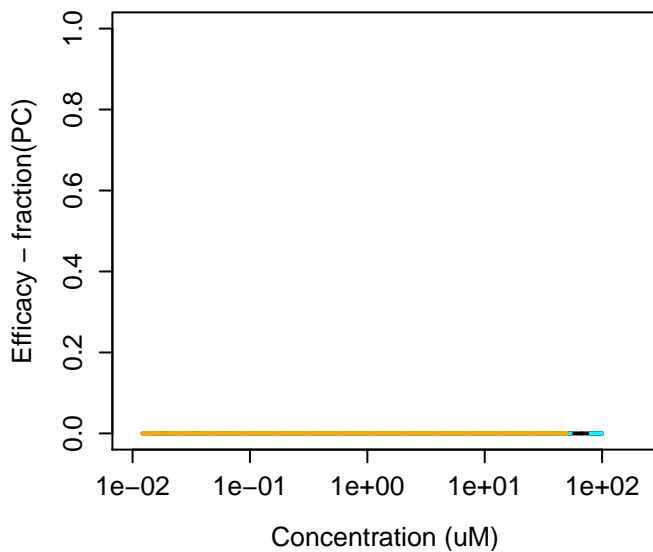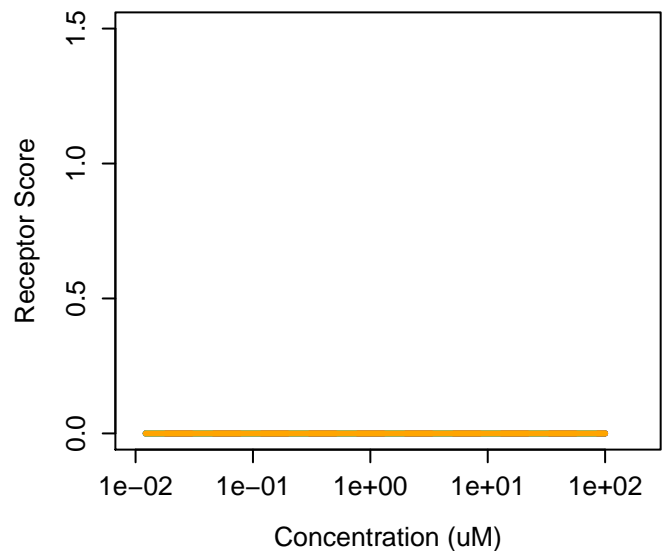

**102-71-6 : Triethanolamine**

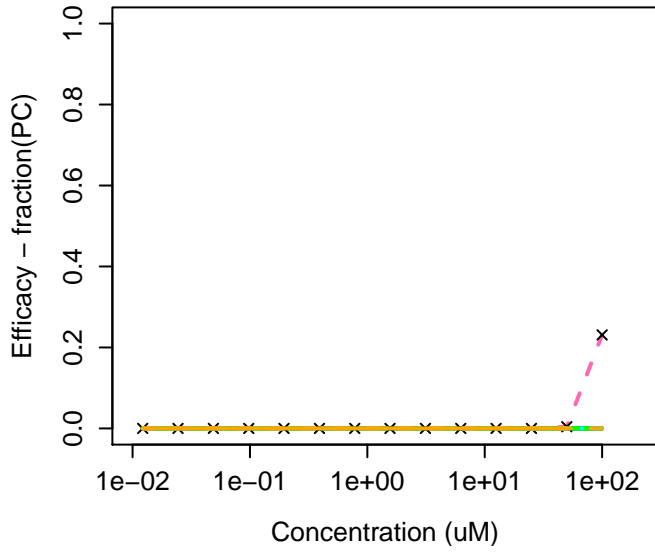

**102-71-6 : Triethanolamine  
Agonist: 0 Antagonist: 0**

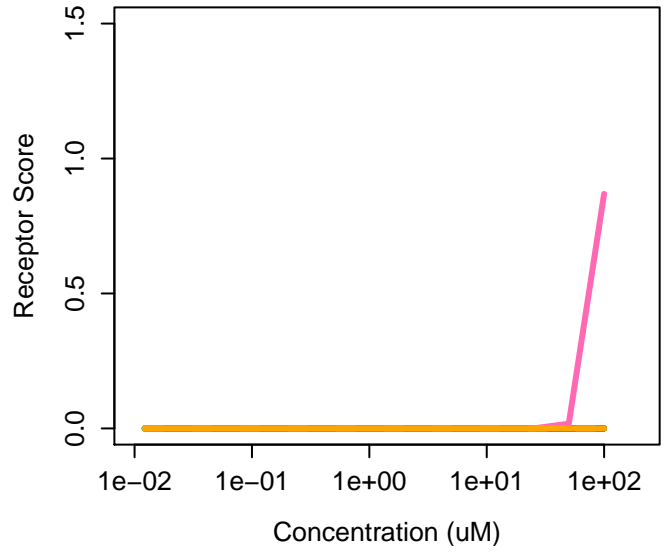

**102-76-1 : Triacetin**

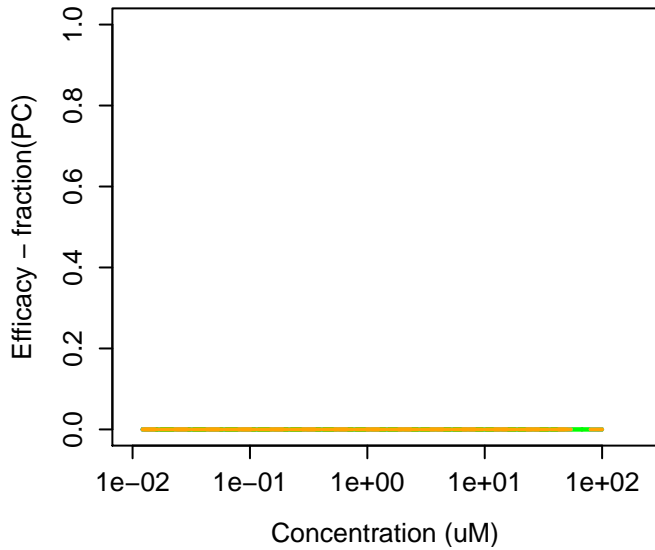

**102-76-1 : Triacetin  
Agonist: 0 Antagonist: 0**



**102-82-9 : Tributylamine**

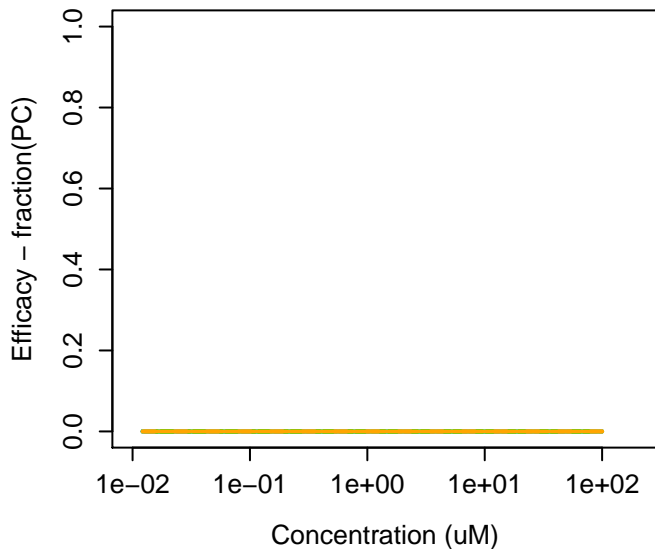

**102-82-9 : Tributylamine  
Agonist: 0 Antagonist: 0**

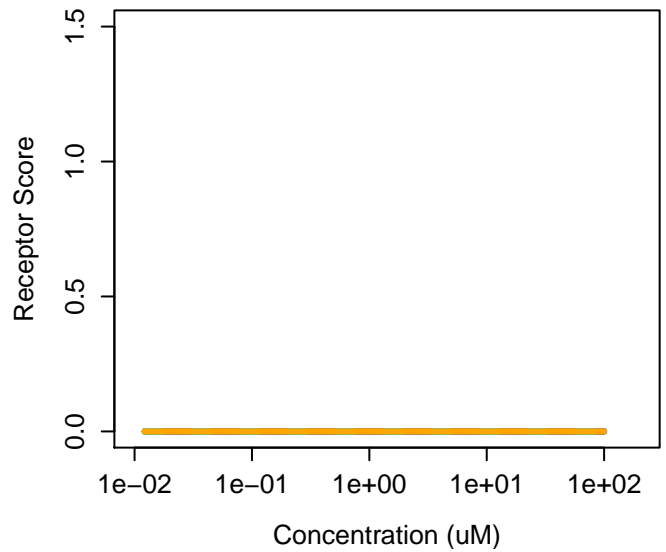

103055-07-8 : Lufenuron

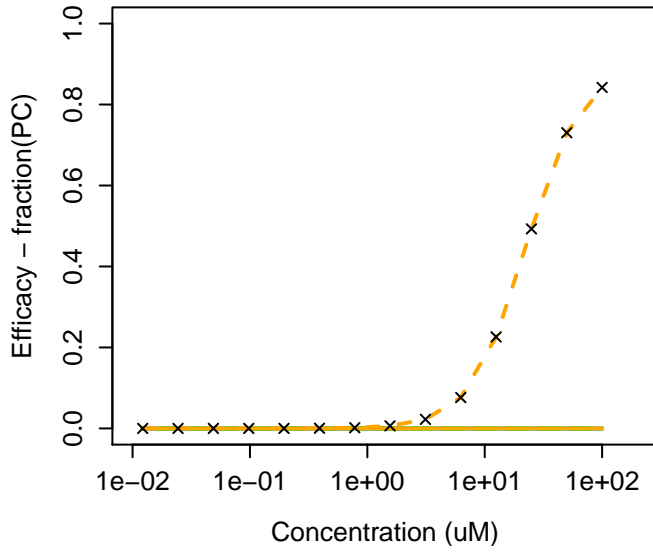

103055-07-8 : Lufenuron  
Agonist: 0 Antagonist: 0

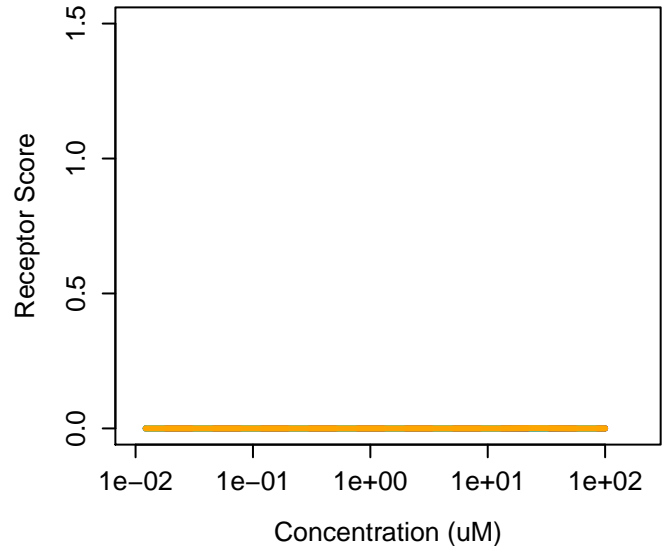

103-09-3 : 2-Ethylhexyl acetate



103-09-3 : 2-Ethylhexyl acetate  
Agonist: 0 Antagonist: 0



1031-07-8 : Endosulfan sulfate

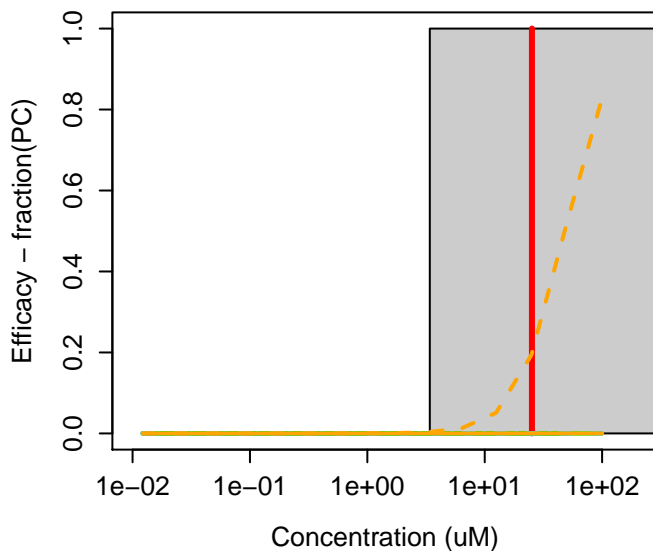

1031-07-8 : Endosulfan sulfate  
Agonist: 0 Antagonist: 0

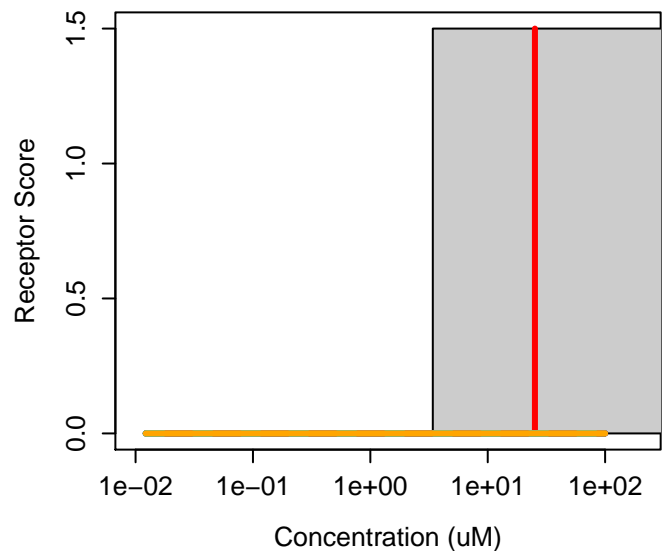



**103-11-7 : 2-Ethylhexyl acrylate**

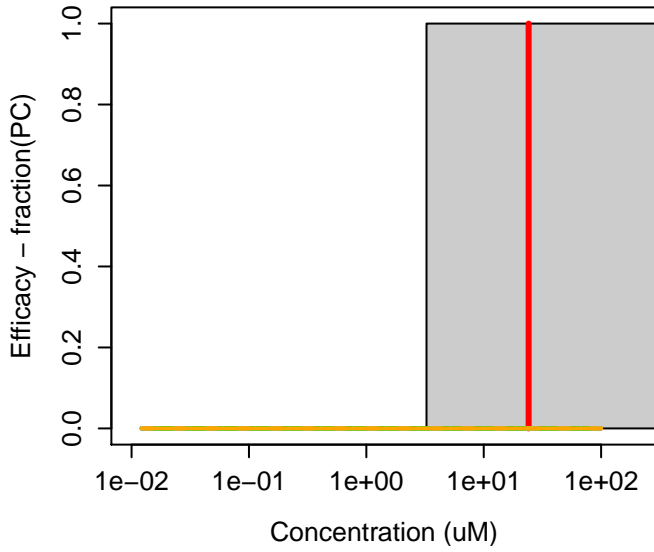

**103-11-7 : 2-Ethylhexyl acrylate  
Agonist: 0 Antagonist: 0**

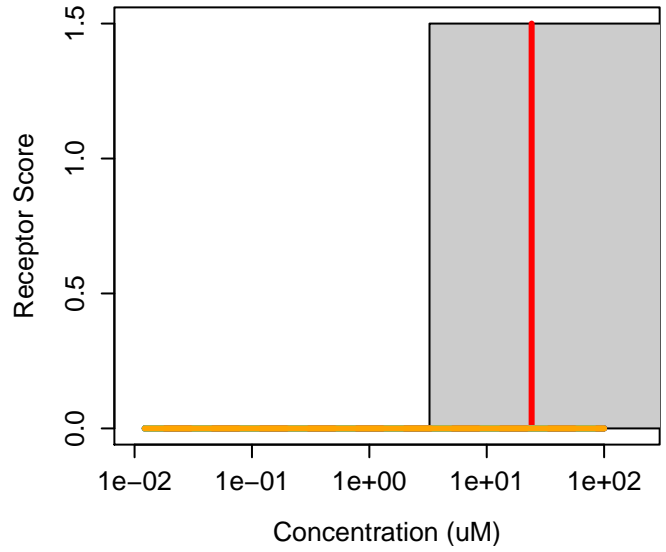

**103-23-1 : Di(2-ethylhexyl) adipate**

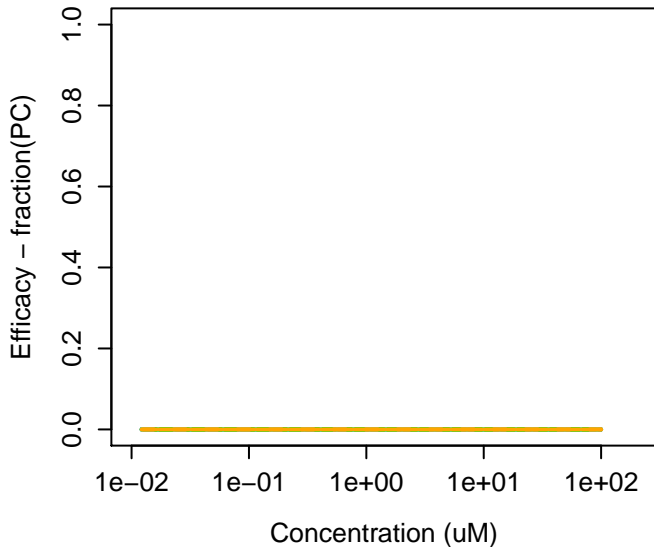

**103-23-1 : Di(2-ethylhexyl) adipate  
Agonist: 0 Antagonist: 0**



**103-24-2 : Bis(2-ethylhexyl) nonanedioate**

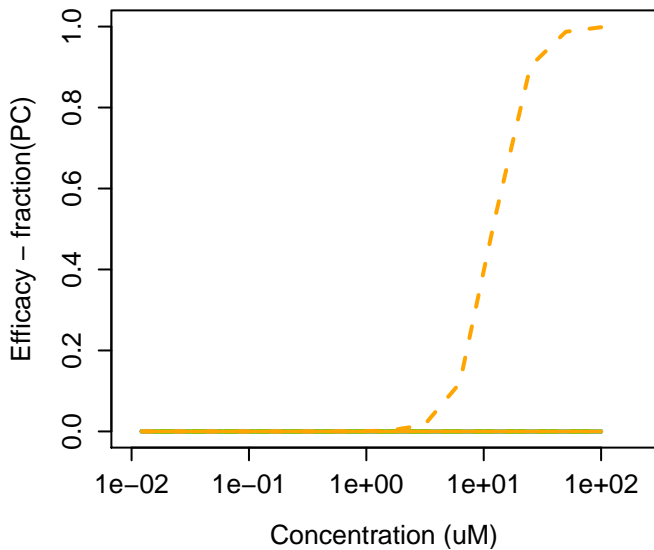

**103-24-2 : Bis(2-ethylhexyl) nonanedioate  
Agonist: 0 Antagonist: 0**

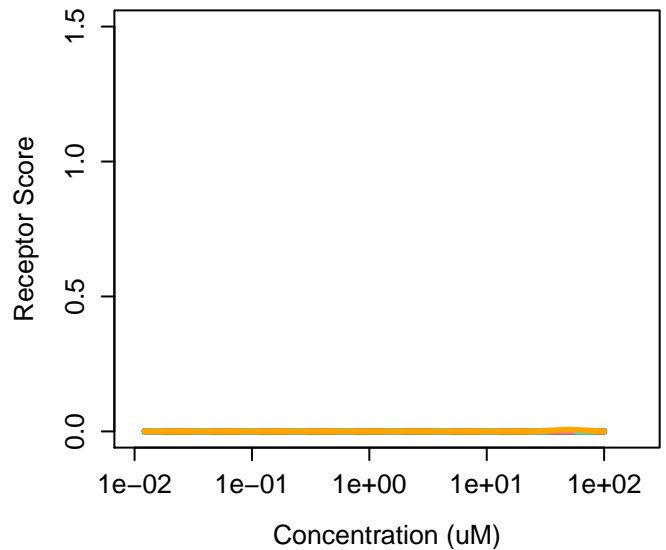

103-33-3 : Azobenzene

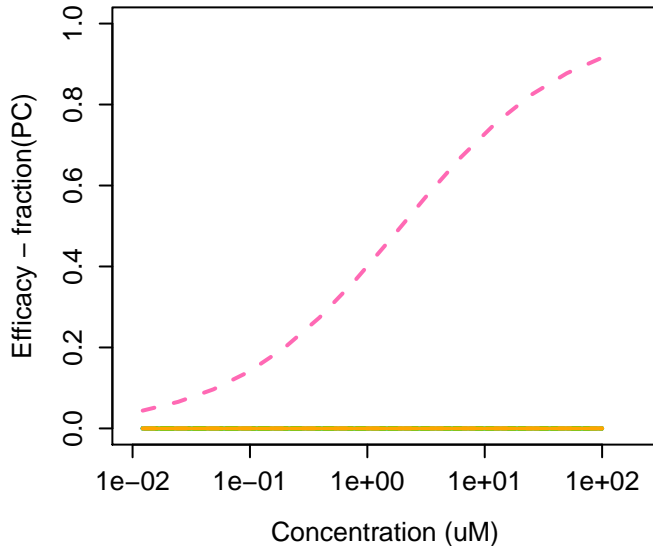

103-33-3 : Azobenzene  
Agonist: 0 Antagonist: 0

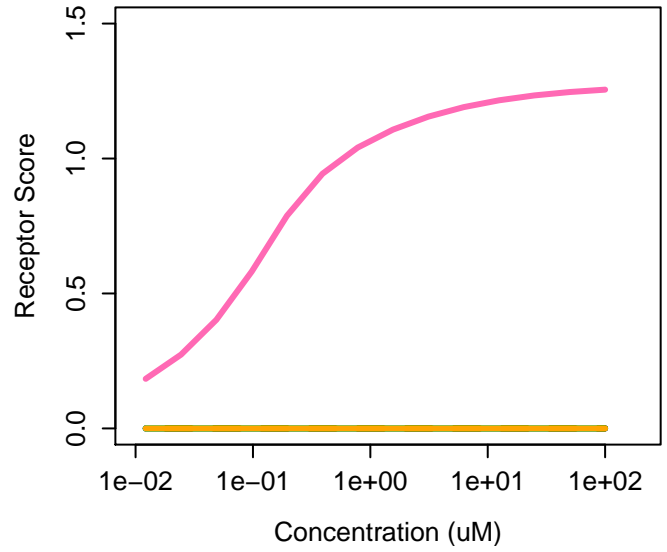

103-34-4 : 4,4'-Dithiodimorpholine

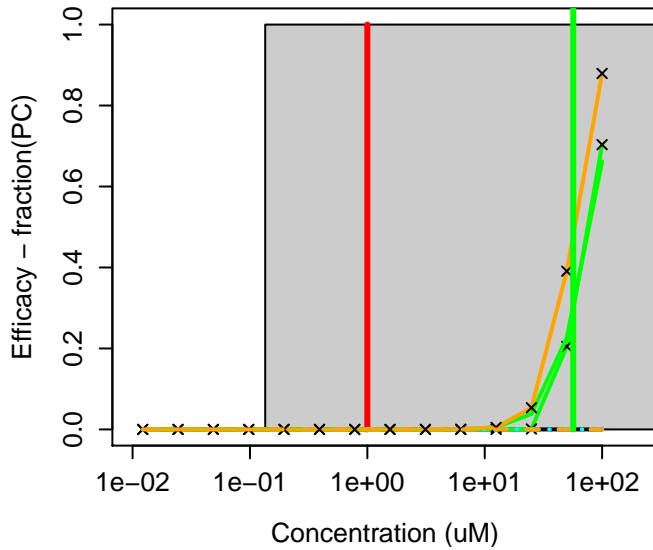

103-34-4 : 4,4'-Dithiodimorpholine  
Agonist: 0 Antagonist: 0.067

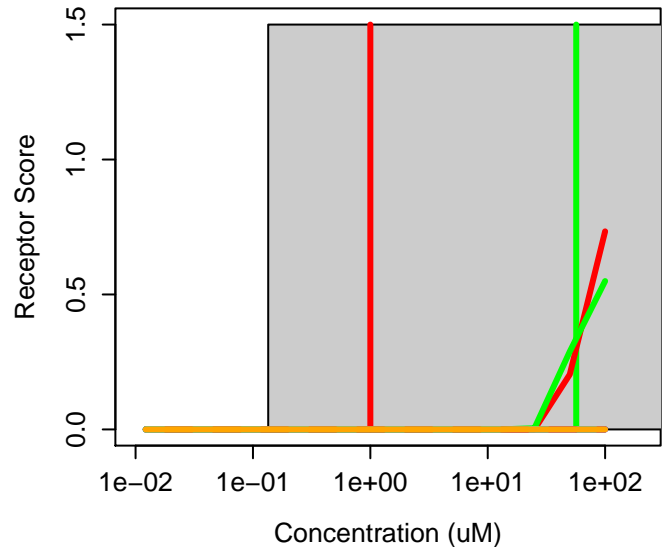

103361-09-7 : Flumioxazin

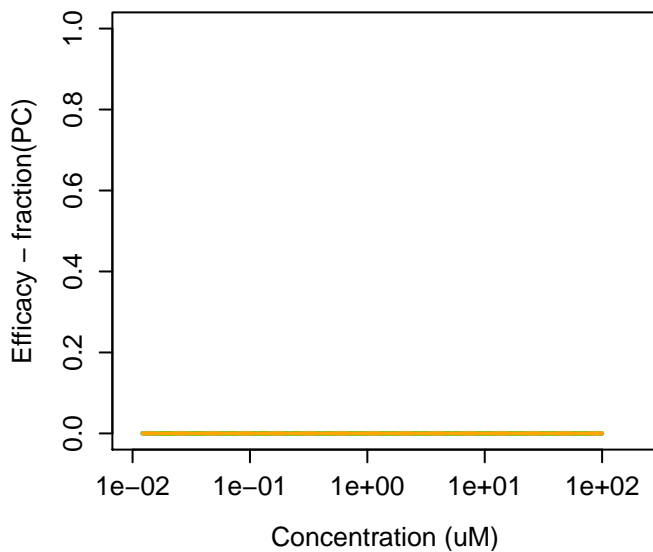

103361-09-7 : Flumioxazin  
Agonist: 0 Antagonist: 0



1034-01-1 : Octyl gallate

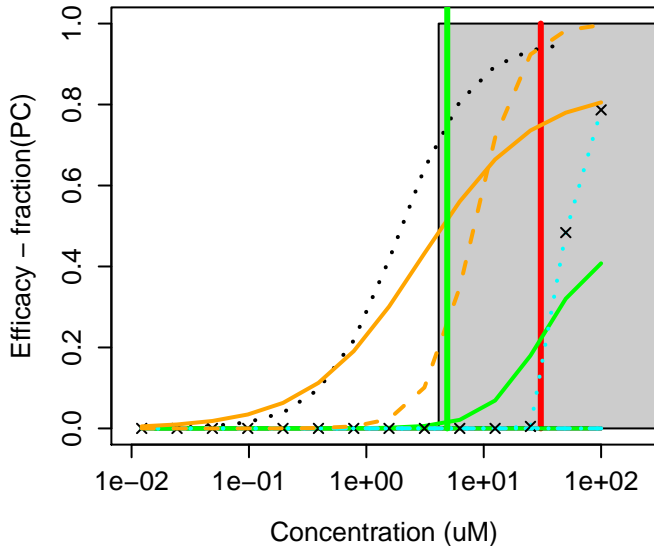

1034-01-1 : Octyl gallate  
Agonist: 0 Antagonist: 0.37

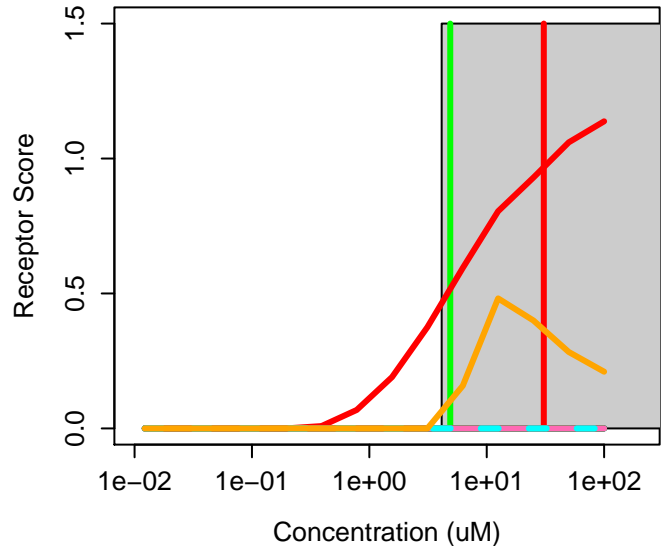

103-41-3 : Benzyl cinnamate

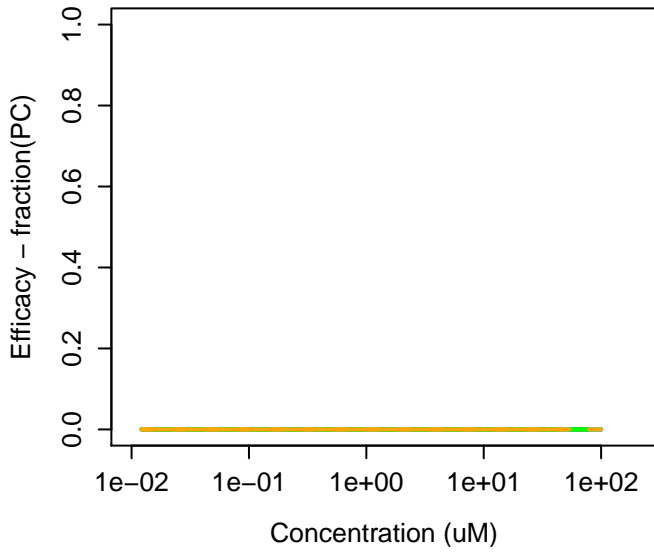

103-41-3 : Benzyl cinnamate  
Agonist: 0 Antagonist: 0

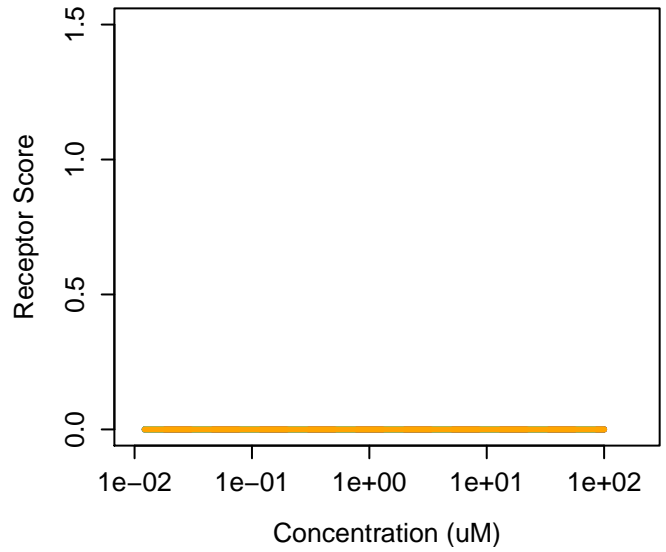

103-65-1 : Propylbenzene

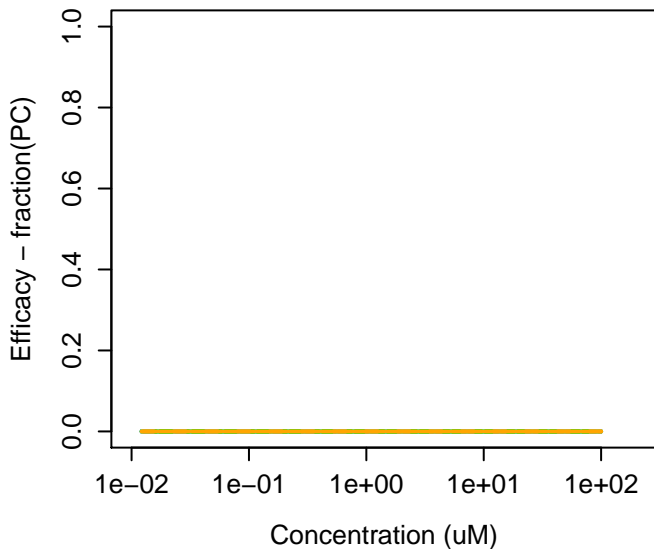

103-65-1 : Propylbenzene  
Agonist: 0 Antagonist: 0



**103-69-5 : N-Ethylaniline**

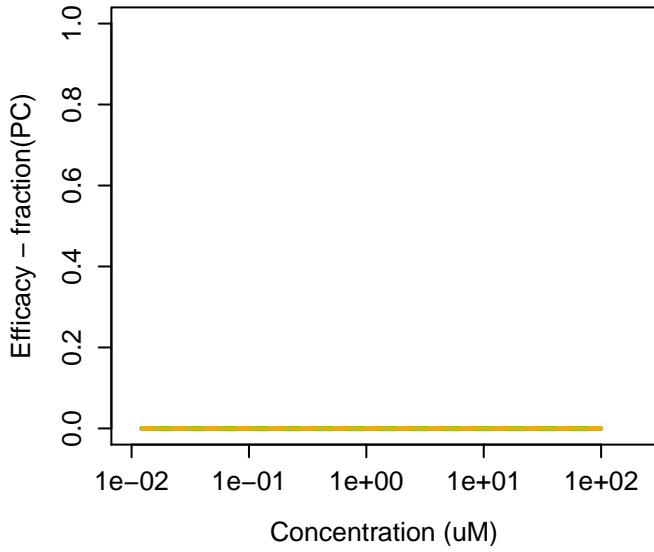

**103-69-5 : N-Ethylaniline**  
**Agonist: 0 Antagonist: 0**



**103-76-4 : 1-Piperazineethanol**



**103-76-4 : 1-Piperazineethanol**  
**Agonist: 0 Antagonist: 0**



**103-90-2 : Acetaminophen**

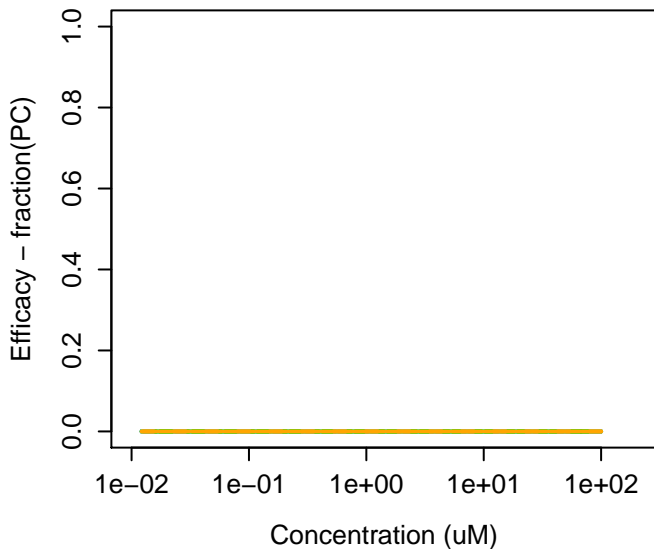

**103-90-2 : Acetaminophen**  
**Agonist: 0 Antagonist: 0**



**104098-48-8 : Imazapic**



**104098-48-8 : Imazapic  
Agonist: 0 Antagonist: 0**



**104-13-2 : 4-Butylaniline**



**104-13-2 : 4-Butylaniline  
Agonist: 0 Antagonist: 0**



**104206-82-8 : Mesotrione**

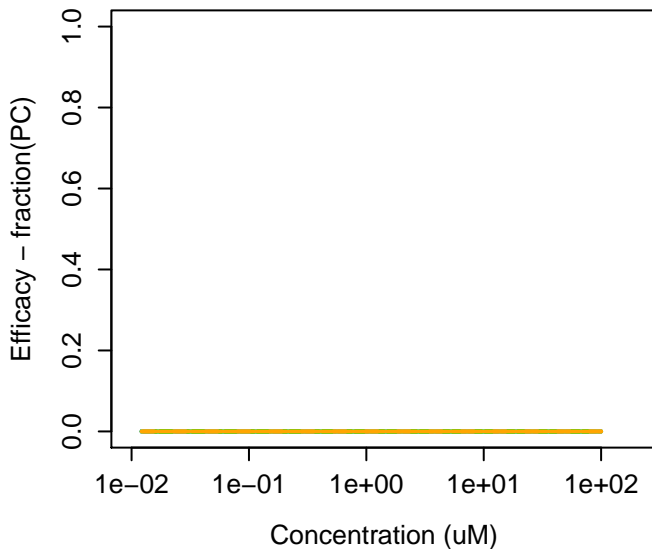

**104206-82-8 : Mesotrione  
Agonist: 0 Antagonist: 0**



**104-40-5 : 4-Nonylphenol**

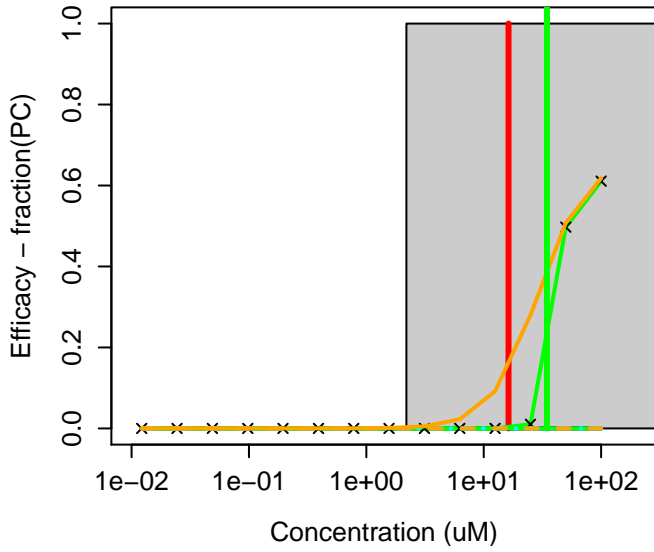

**104-40-5 : 4-Nonylphenol**  
Agonist: 0 Antagonist: 0.046

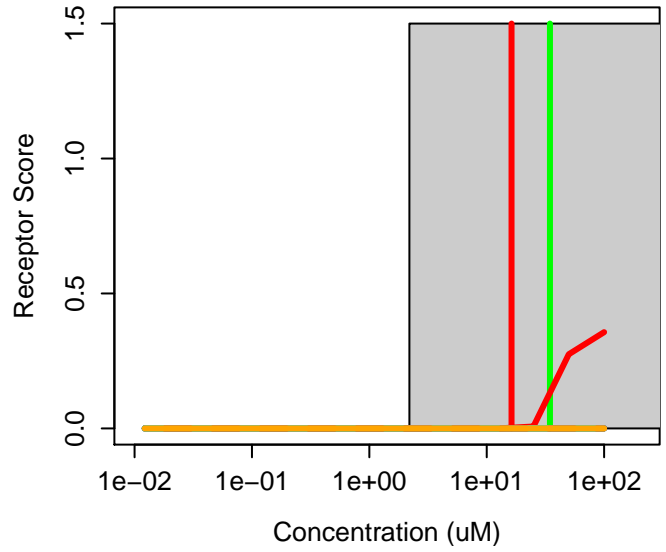

**104-43-8 : 4-Dodecylphenol**

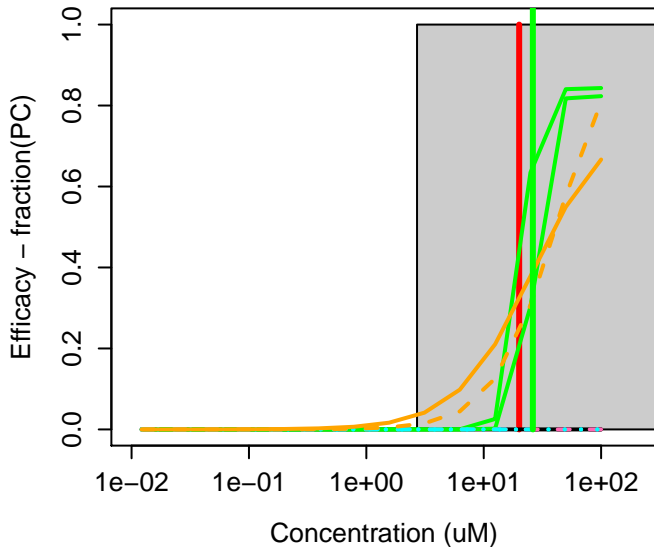

**104-43-8 : 4-Dodecylphenol**  
Agonist: 0 Antagonist: 0.2

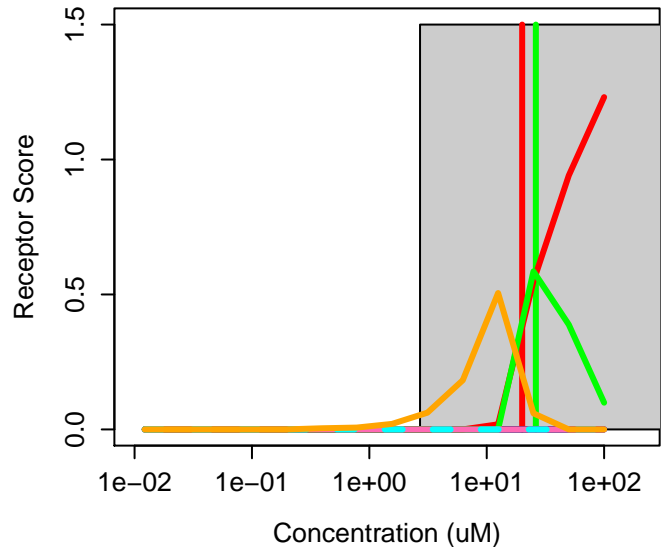

**104-45-0 : 4-Propylanisole**

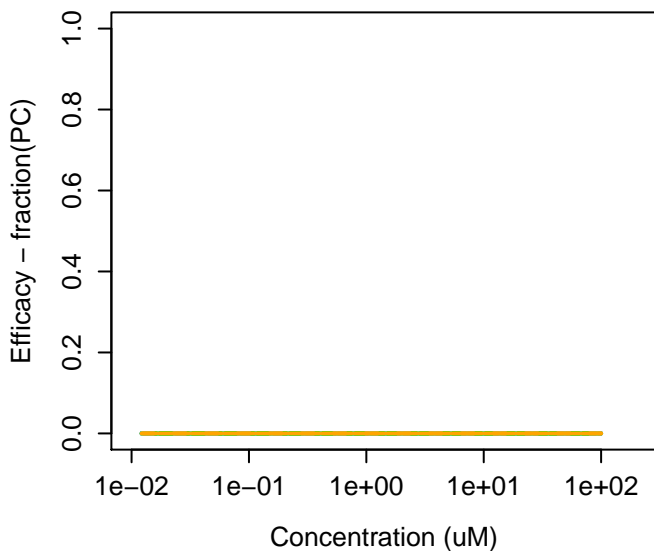

**104-45-0 : 4-Propylanisole**  
Agonist: 0 Antagonist: 0

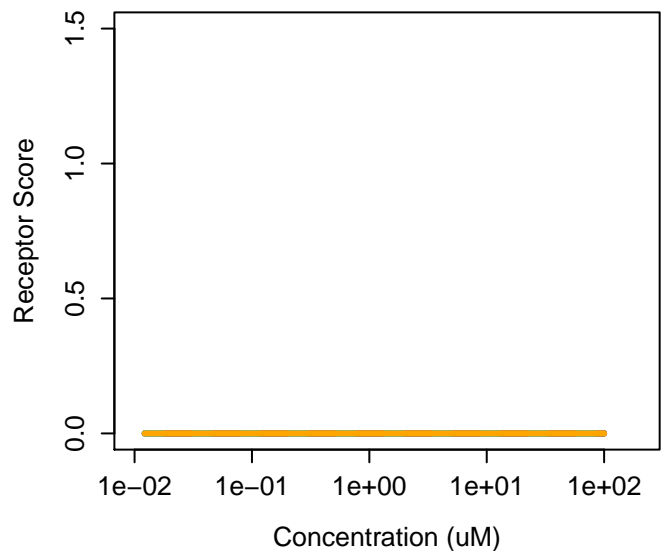

104-51-8 : Butylbenzene

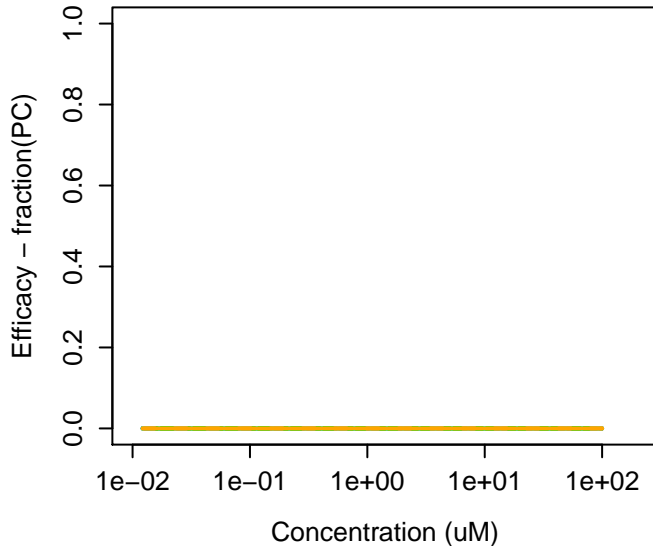

104-51-8 : Butylbenzene  
Agonist: 0 Antagonist: 0



10453-86-8 : Resmethrin

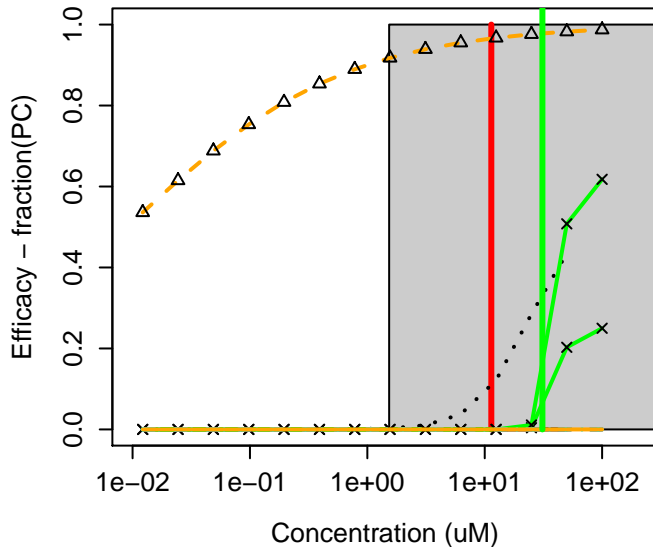

10453-86-8 : Resmethrin  
Agonist: 0 Antagonist: 0.15

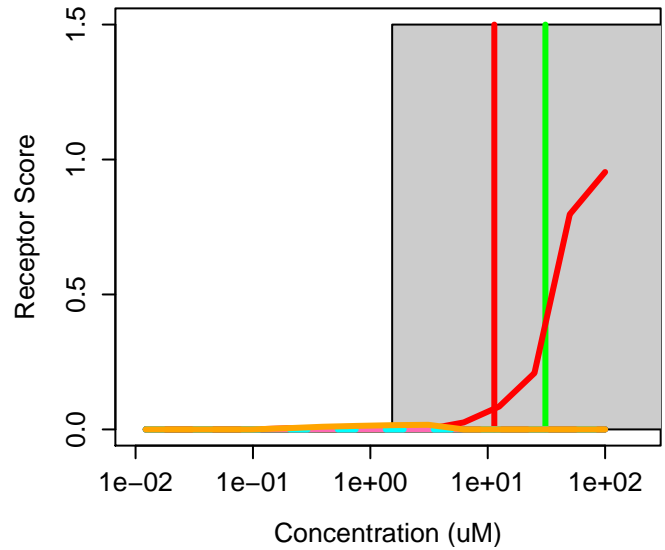

104-54-1 : 3-Phenyl-2-propen-1-ol



104-54-1 : 3-Phenyl-2-propen-1-ol  
Agonist: 0 Antagonist: 0



**104-61-0 : gamma-Nonanolactone**



**104-61-0 : gamma-Nonanolactone  
Agonist: 0 Antagonist: 0**



**104-66-5 : 1,2-Diphenoxyethane**



**104-66-5 : 1,2-Diphenoxyethane  
Agonist: 0 Antagonist: 0**



**104-67-6 : 5-Heptyldihydro-2(3H)-furanone**

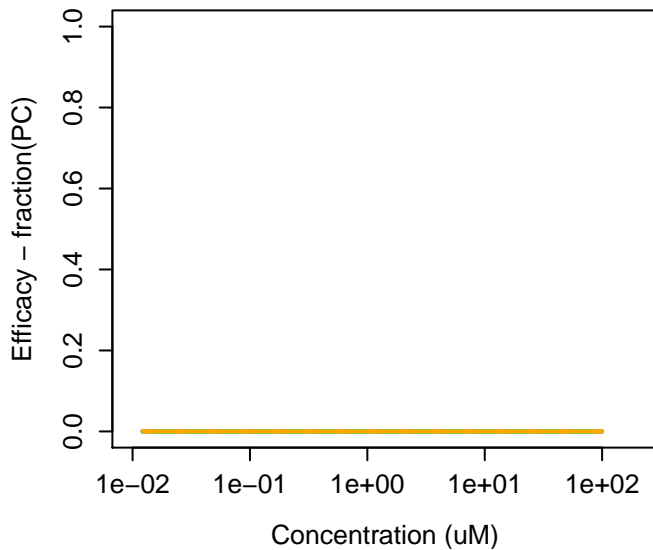

**104-67-6 : 5-Heptyldihydro-2(3H)-furanone  
Agonist: 0 Antagonist: 0**

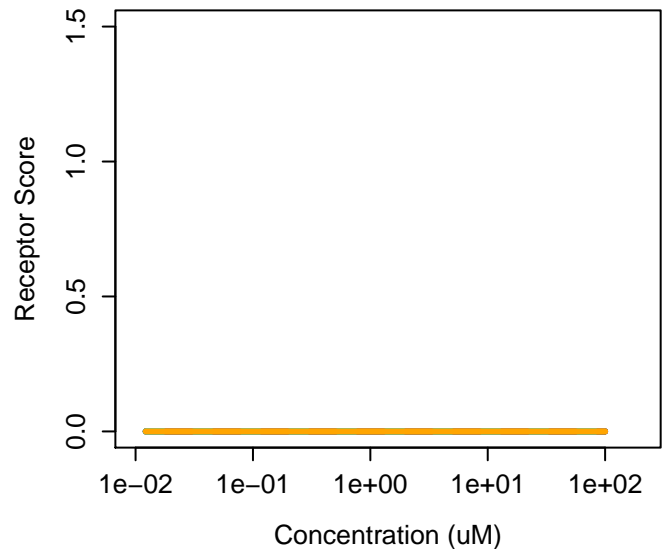



104-76-7 : 2-Ethyl-1-hexanol



104-76-7 : 2-Ethyl-1-hexanol  
Agonist: 0 Antagonist: 0



104795-68-8 : CI-959

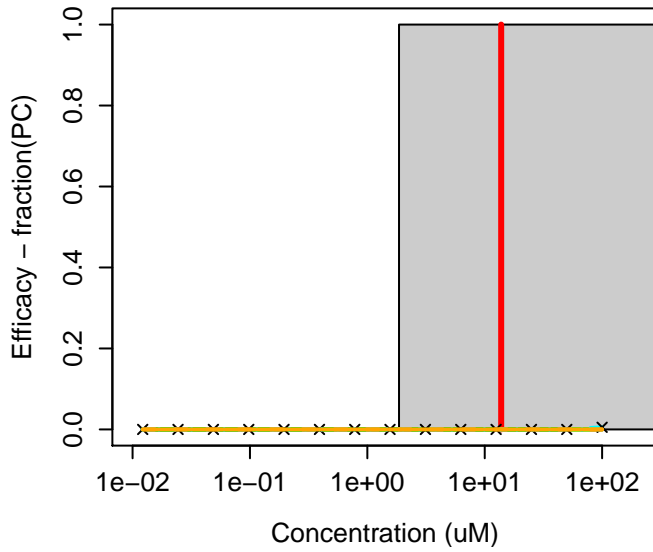

104795-68-8 : CI-959  
Agonist: 0 Antagonist: 0

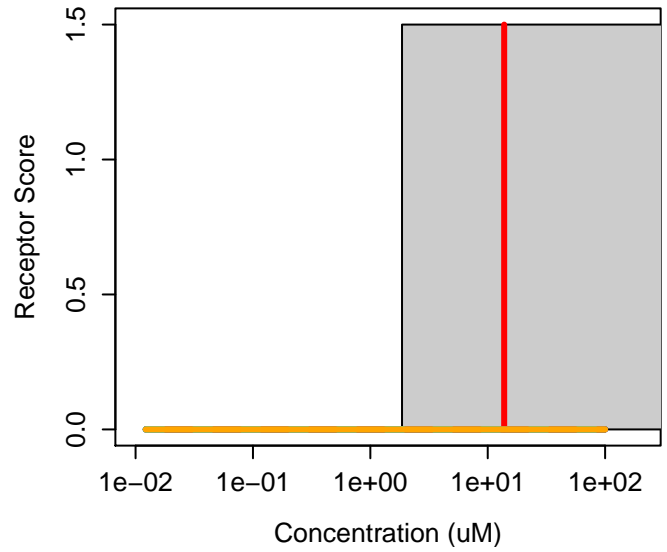

105-21-5 : 1,4-Heptanolide

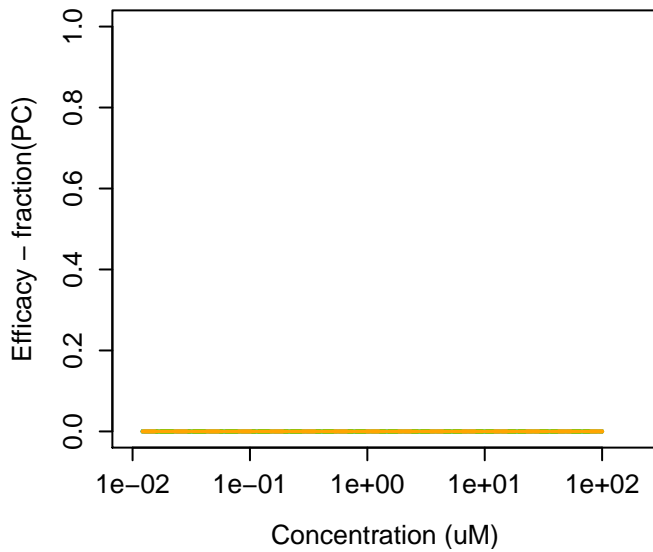

105-21-5 : 1,4-Heptanolide  
Agonist: 0 Antagonist: 0

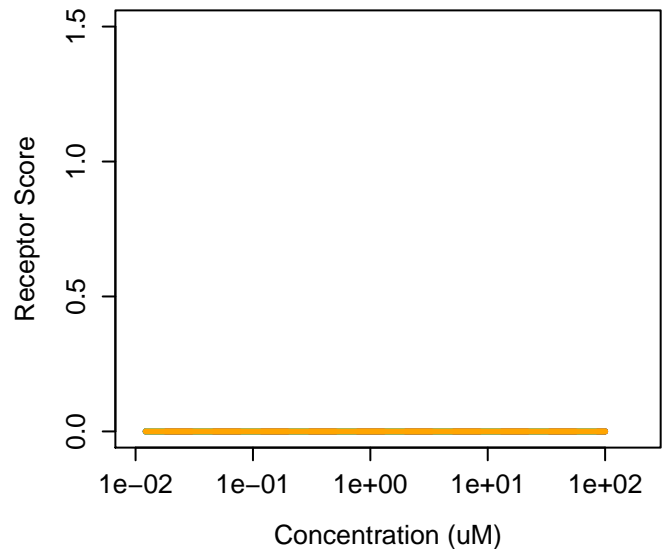

105-37-3 : Ethyl propionate



105-37-3 : Ethyl propionate  
Agonist: 0 Antagonist: 0



10540-29-1 : Tamoxifen

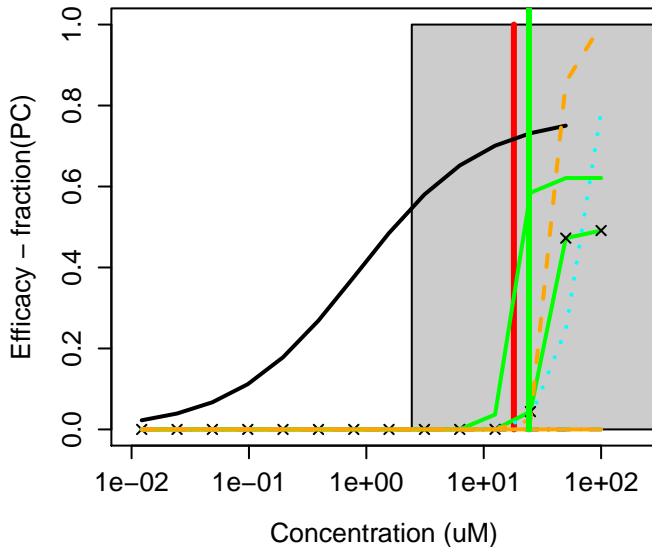

10540-29-1 : Tamoxifen  
Agonist: 0.033 Antagonist: 0.042

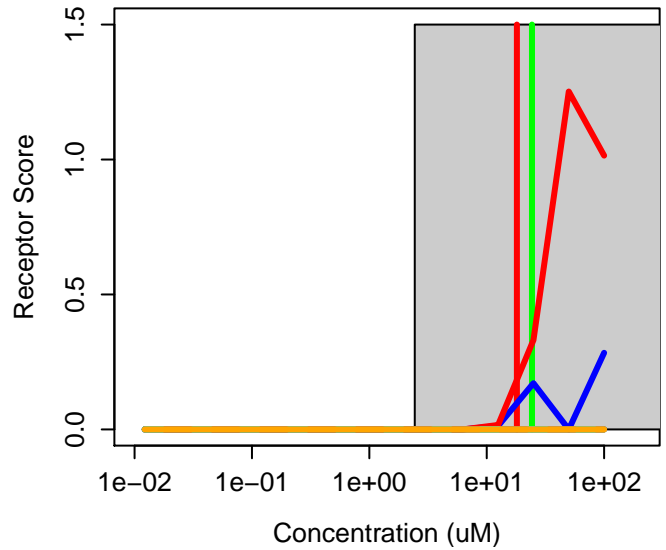

105512-06-9 : Clodinafop-propargyl

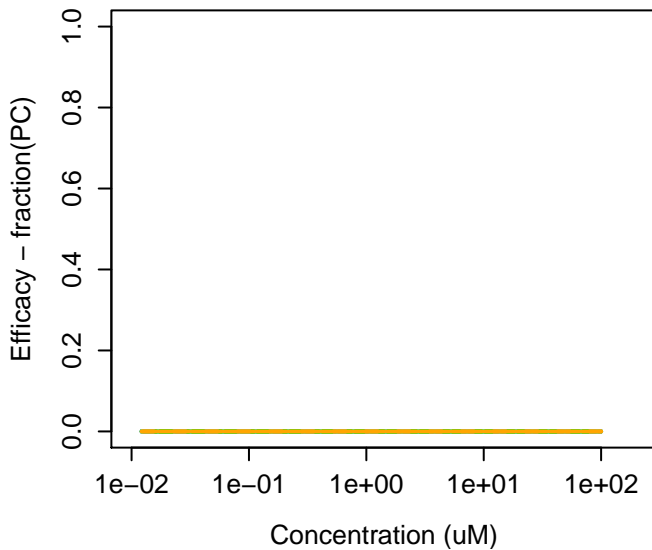

105512-06-9 : Clodinafop-propargyl  
Agonist: 0 Antagonist: 0



**105-53-3 : Diethyl propanedioate**



**105-53-3 : Diethyl propanedioate  
Agonist: 0 Antagonist: 0**



**105-54-4 : Ethyl butyrate**

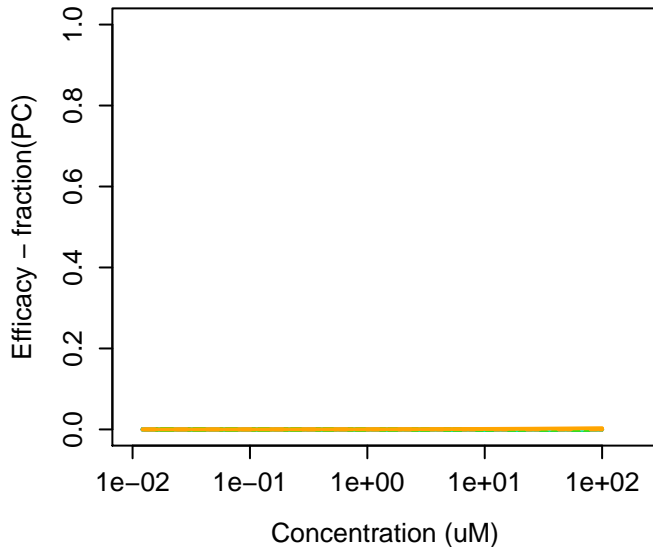

**105-54-4 : Ethyl butyrate  
Agonist: 0 Antagonist: 0**

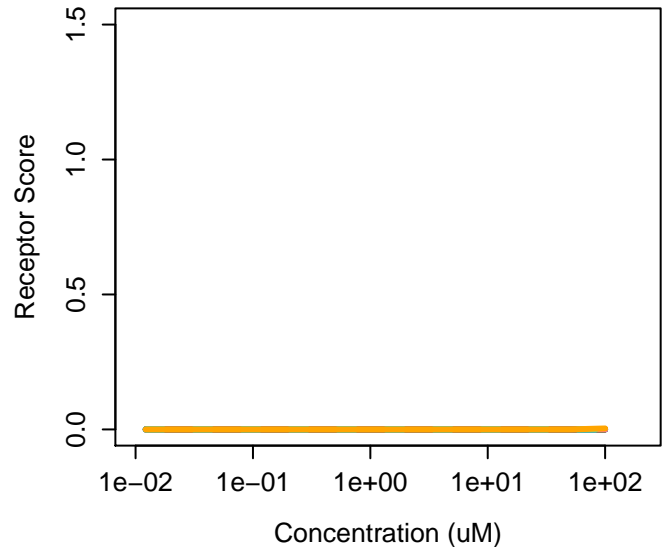

**105-55-5 : N,N'-Diethylthiourea**



**105-55-5 : N,N'-Diethylthiourea  
Agonist: 0 Antagonist: 0**



105-60-2 : Caprolactam

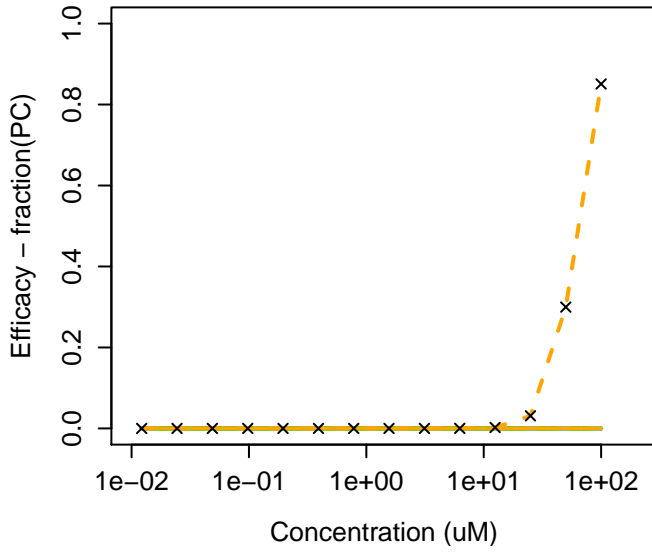

105-60-2 : Caprolactam  
Agonist: 0 Antagonist: 0

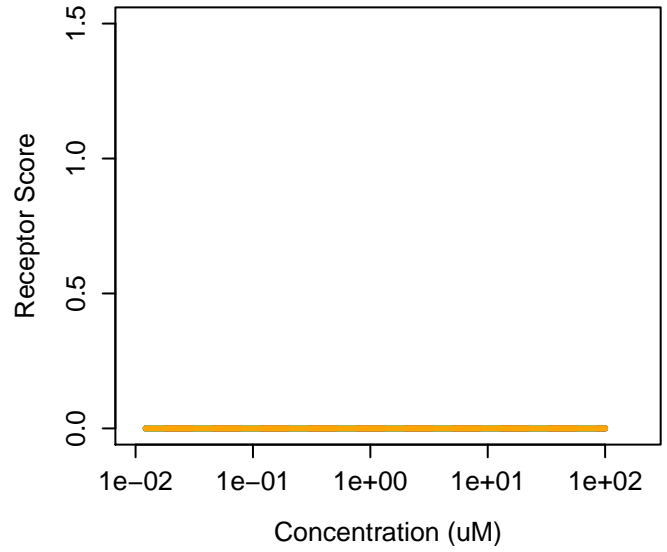

105624-86-0 : 5HPP-33

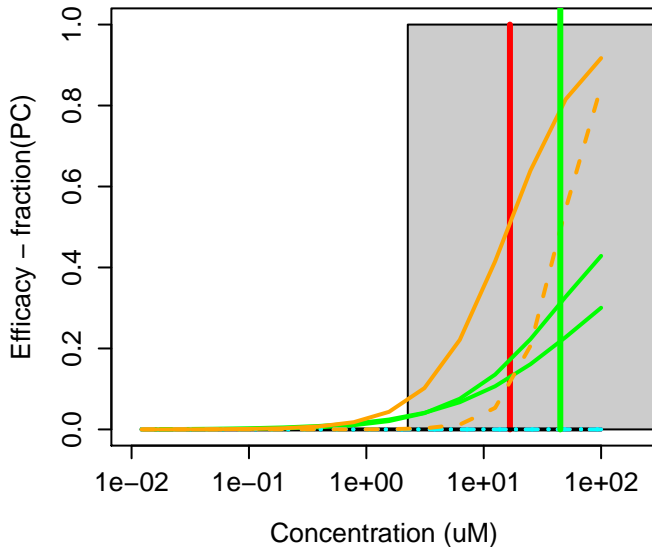

105624-86-0 : 5HPP-33  
Agonist: 0 Antagonist: 0.12

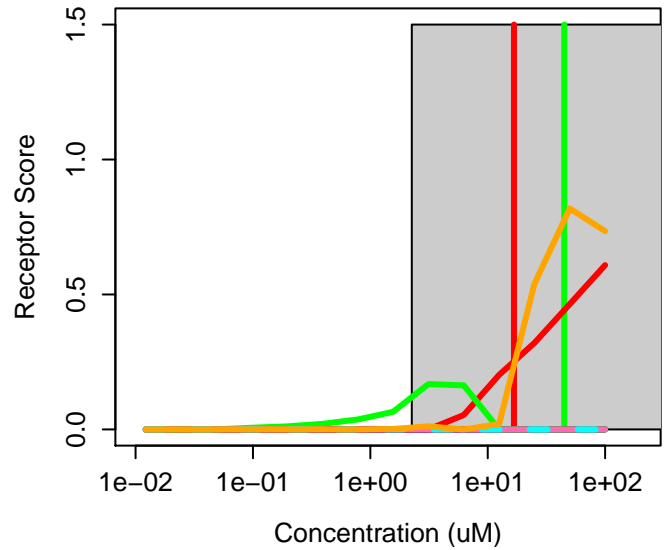

105-67-9 : 2,4-Dimethylphenol

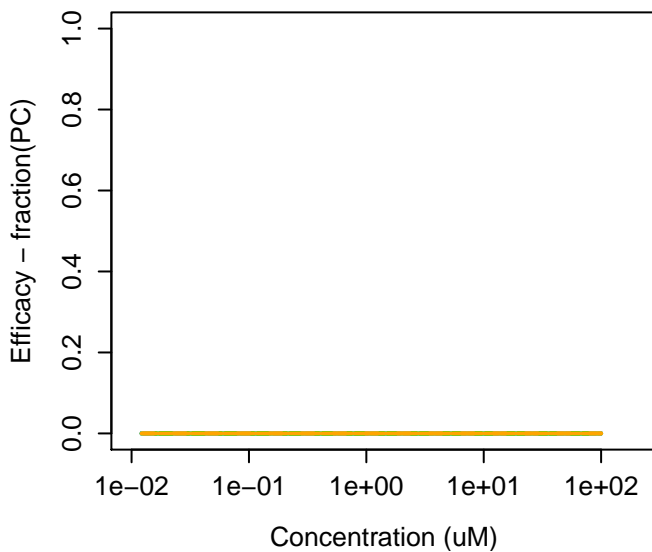

105-67-9 : 2,4-Dimethylphenol  
Agonist: 0 Antagonist: 0



105-87-3 : Geranyl acetate



105-87-3 : Geranyl acetate  
Agonist: 0 Antagonist: 0



105-99-7 : Dibutyl hexanedioate



105-99-7 : Dibutyl hexanedioate  
Agonist: 0 Antagonist: 0



10605-21-7 : Carbendazim

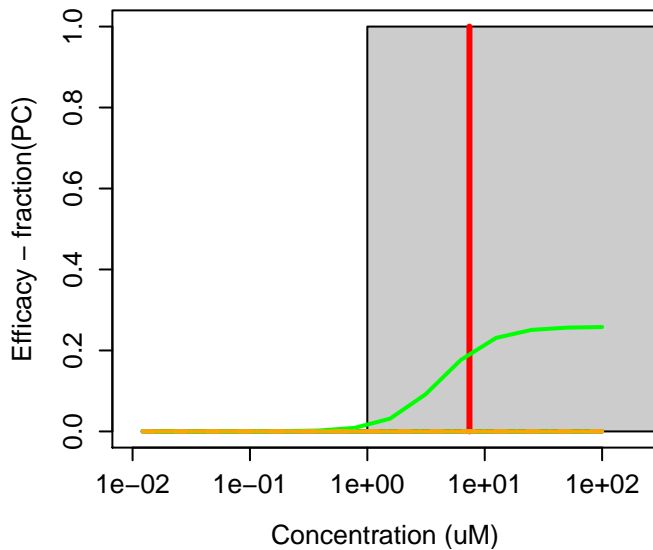

10605-21-7 : Carbendazim  
Agonist: 0 Antagonist: 0

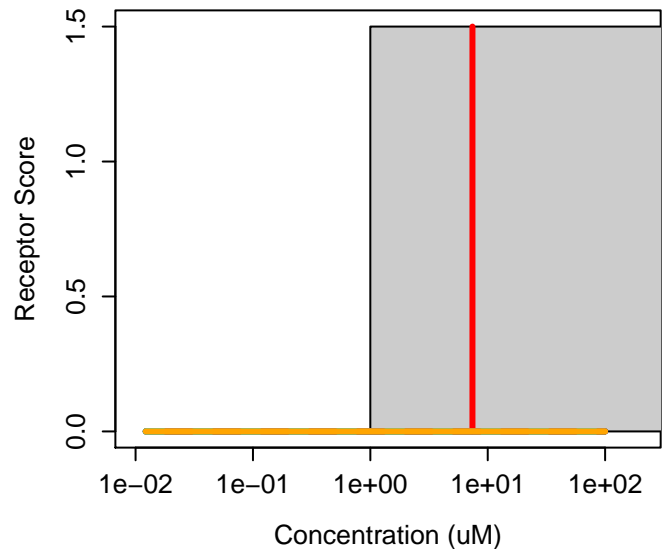

1061517-62-1 : PharmaGSID\_47337

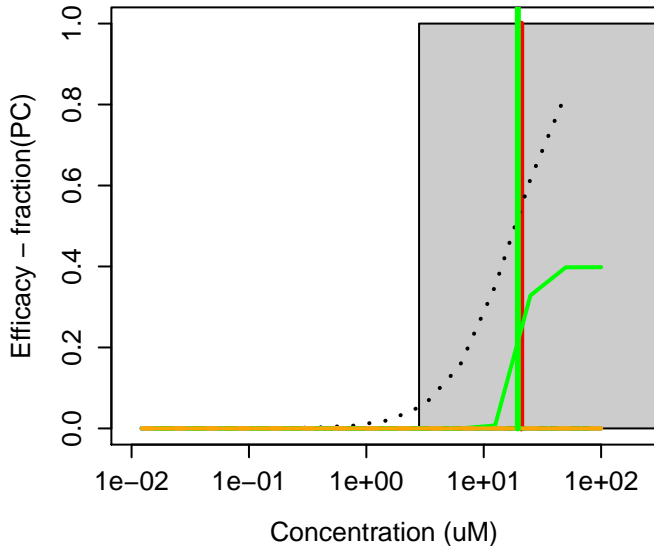

1061517-62-1 : PharmaGSID\_47337  
Agonist: 0.021 Antagonist: 0.042

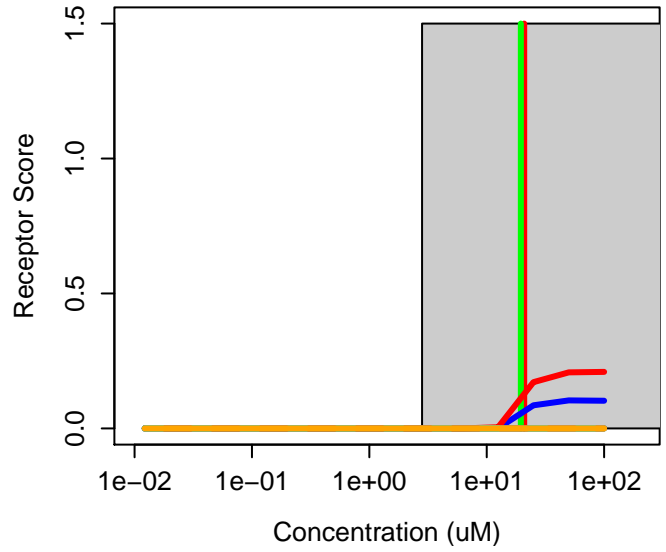

1062243-51-9 : PharmaGSID\_48511

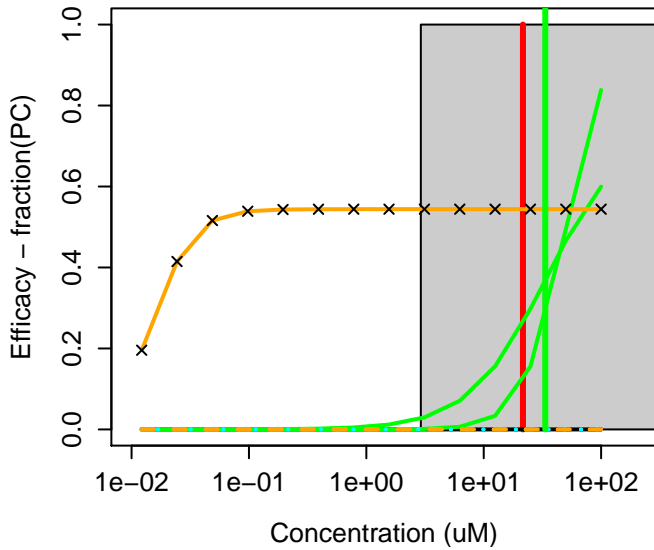

1062243-51-9 : PharmaGSID\_48511  
Agonist: 0 Antagonist: 0.1

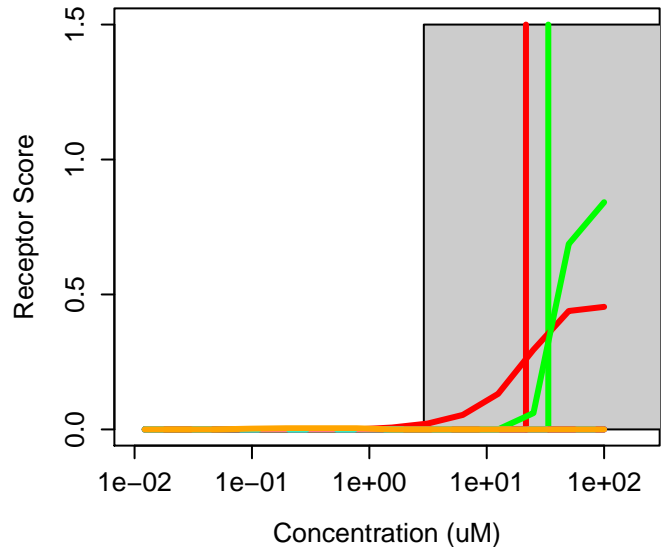

106-22-9 : Citronellol

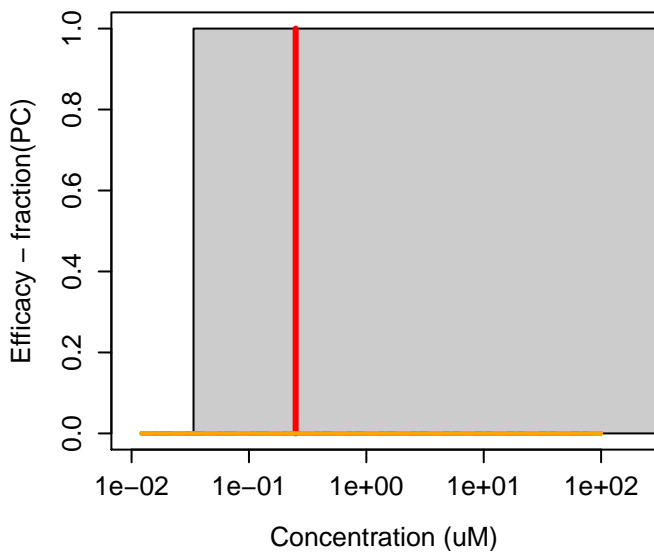

106-22-9 : Citronellol  
Agonist: 0 Antagonist: 0

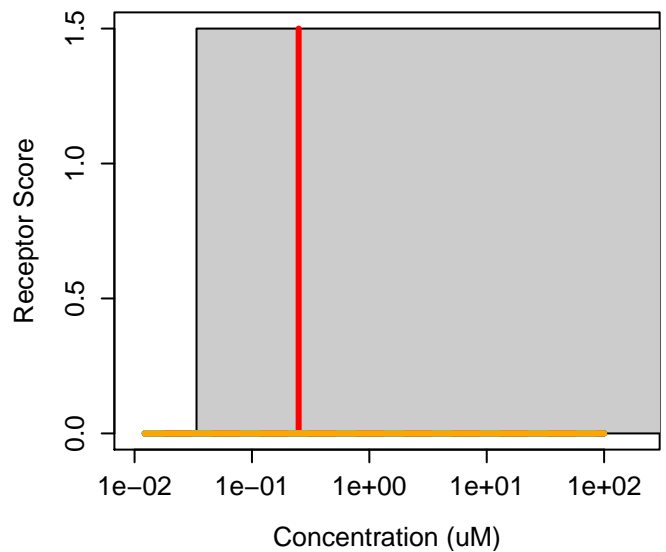

**106-23-0 : Citronellal**



**106-23-0 : Citronellal  
Agonist: 0 Antagonist: 0**



**106-24-1 : Geraniol**

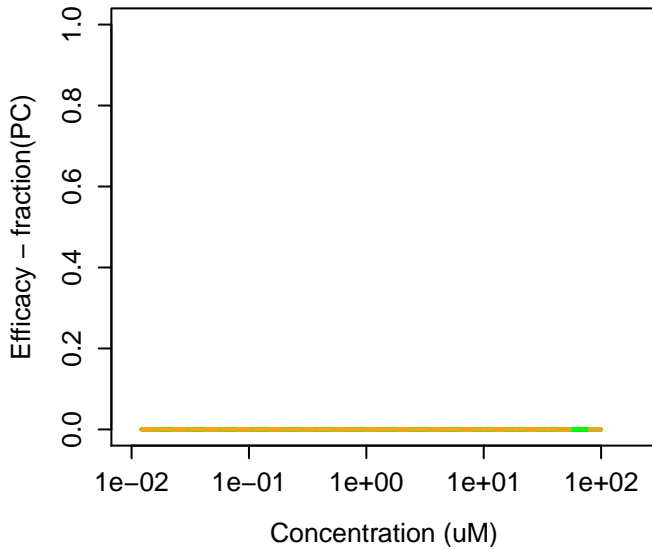

**106-24-1 : Geraniol  
Agonist: 0 Antagonist: 0**



**106-25-2 : (2Z)-3,7-Dimethylocta-2,6-dien-1-ol**

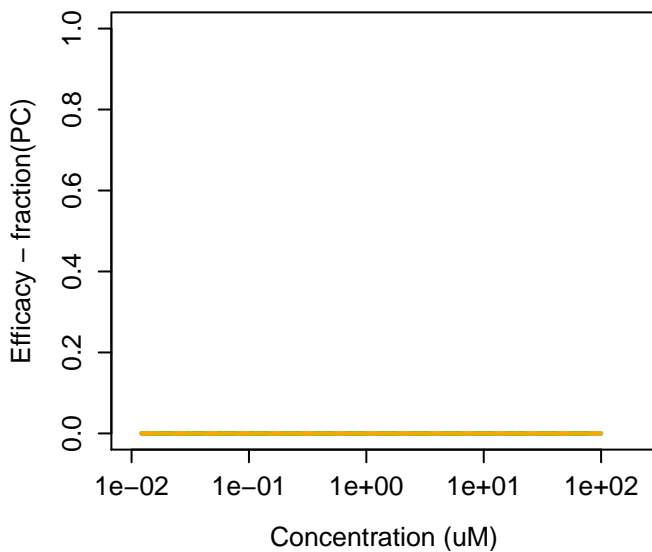

**106-25-2 : (2Z)-3,7-Dimethylocta-2,6-dien-1-ol  
Agonist: 0 Antagonist: 0**



**106-27-4 : Isopentyl butyrate**



**106-27-4 : Isopentyl butyrate  
Agonist: 0 Antagonist: 0**



**106-30-9 : Ethyl heptanoate**



**106-30-9 : Ethyl heptanoate  
Agonist: 0 Antagonist: 0**



**106-43-4 : 4-Chlorotoluene**



**106-43-4 : 4-Chlorotoluene  
Agonist: 0 Antagonist: 0**





106-44-5 : p-Cresol

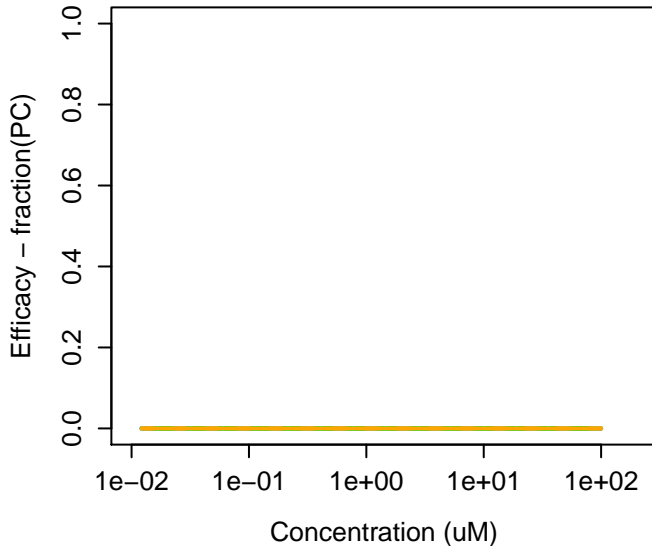

106-44-5 : p-Cresol  
Agonist: 0 Antagonist: 0



106-45-6 : 4-Thiocresol

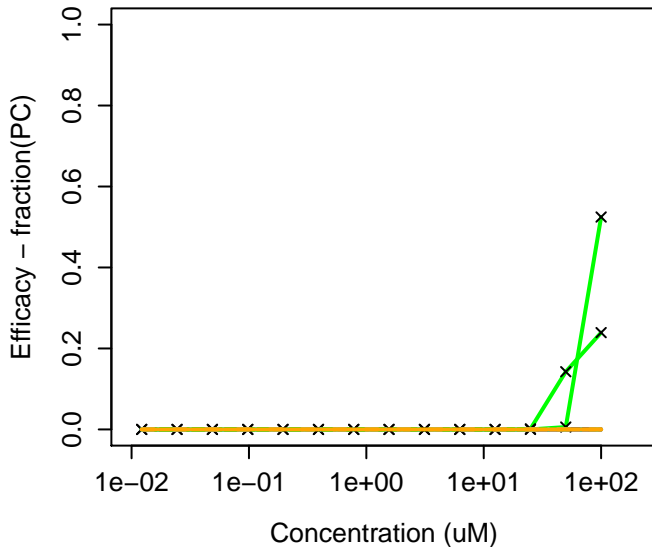

106-45-6 : 4-Thiocresol  
Agonist: 0 Antagonist: 0

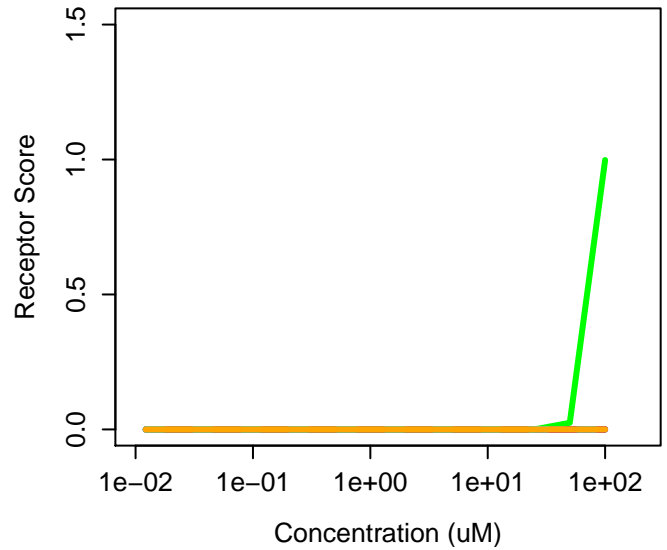

106-46-7 : 1,4-Dichlorobenzene

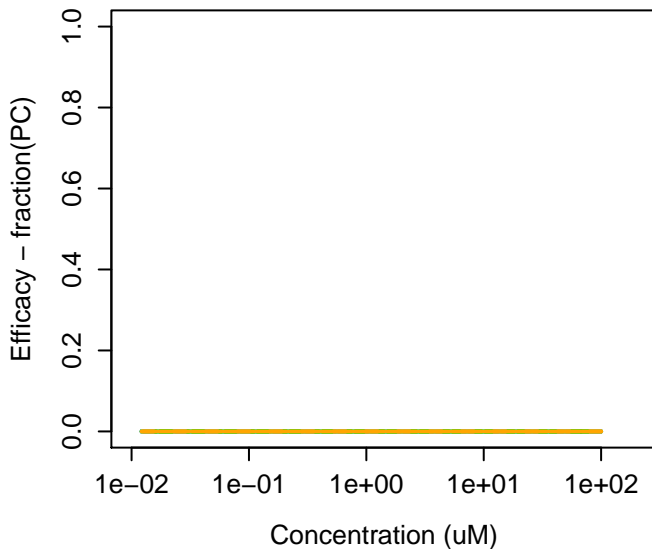

106-46-7 : 1,4-Dichlorobenzene  
Agonist: 0 Antagonist: 0



**106-47-8 : 4-Chloroaniline**

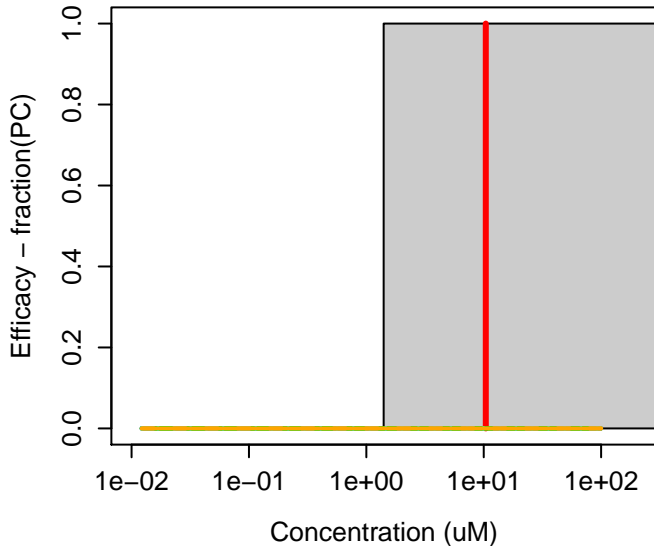

**106-47-8 : 4-Chloroaniline**  
**Agonist: 0 Antagonist: 0**

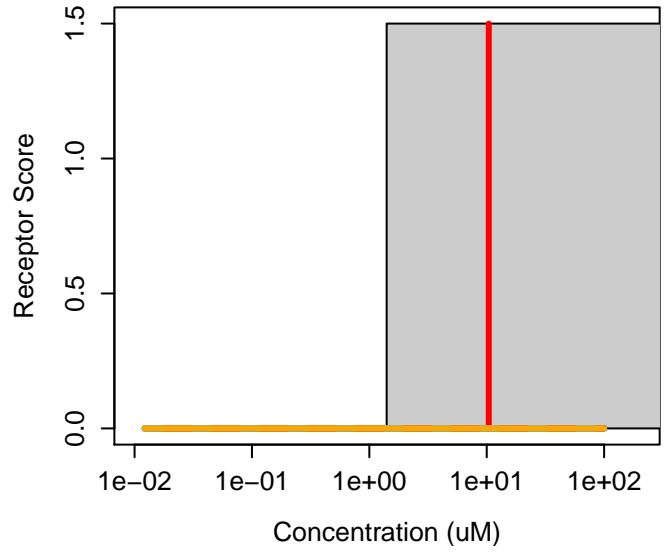

**106-48-9 : 4-Chlorophenol**

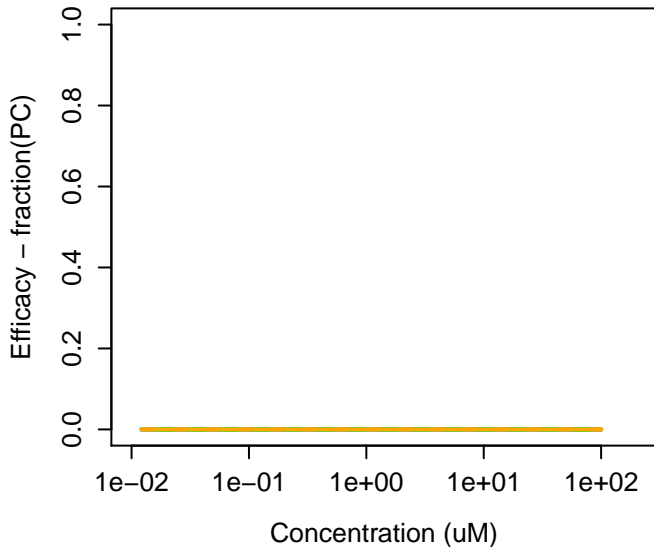

**106-48-9 : 4-Chlorophenol**  
**Agonist: 0 Antagonist: 0**



**106-49-0 : 4-Methylaniline**

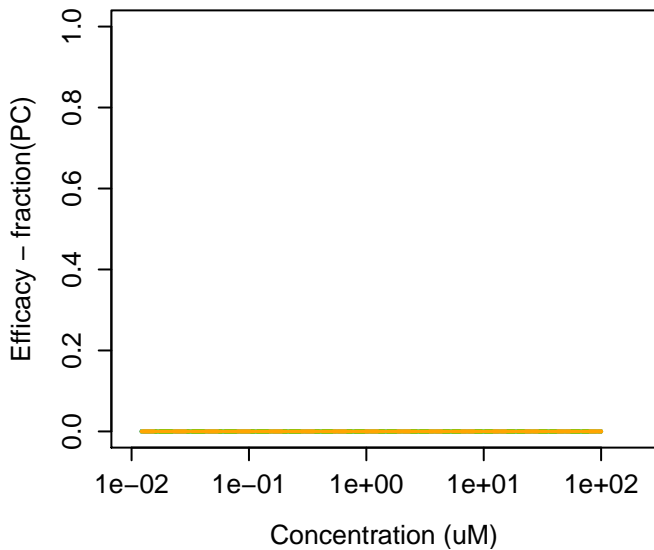

**106-49-0 : 4-Methylaniline**  
**Agonist: 0 Antagonist: 0**



**106-50-3 : 1,4-Benzenediamine**

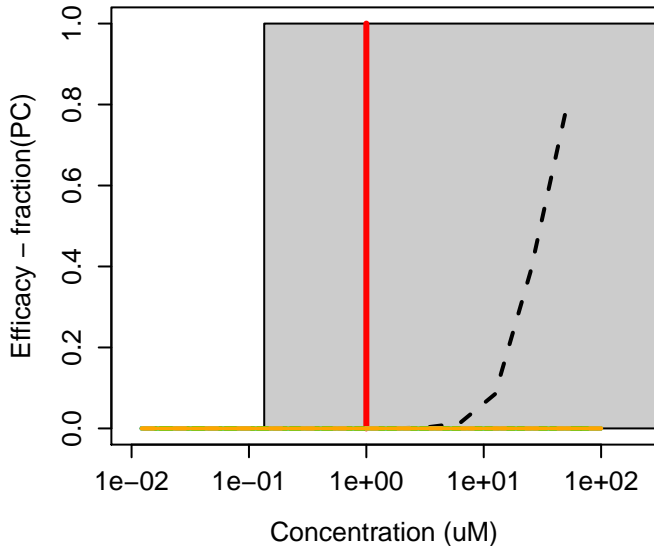

**106-50-3 : 1,4-Benzenediamine  
Agonist: 0 Antagonist: 0**

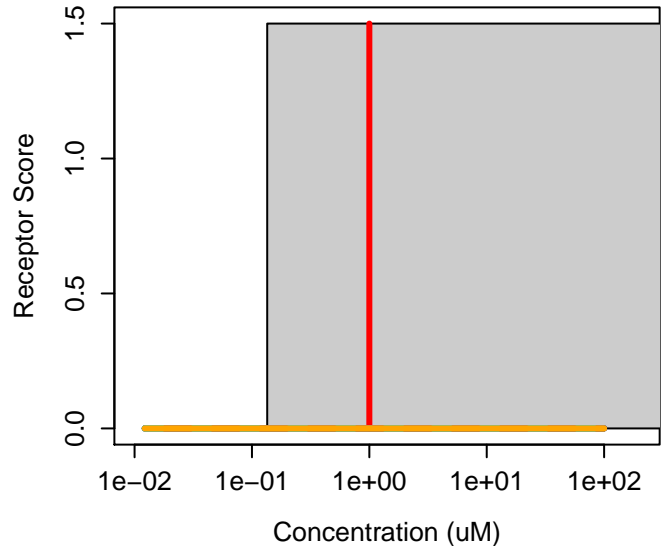

**106-65-0 : Dimethyl succinate**

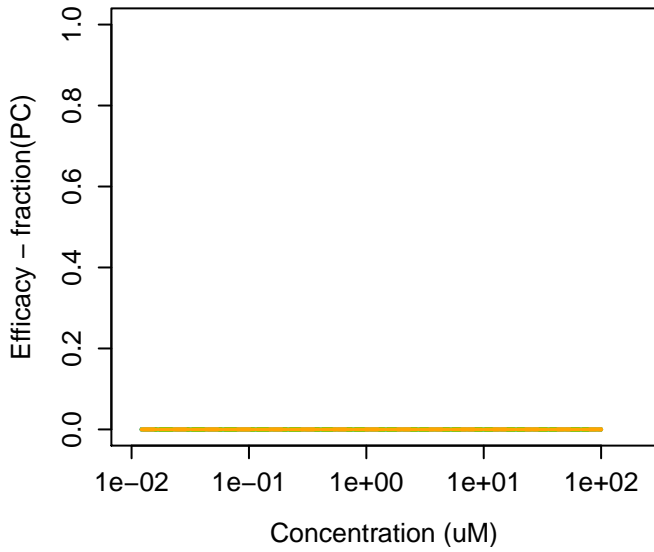

**106-65-0 : Dimethyl succinate  
Agonist: 0 Antagonist: 0**



**106-68-3 : 3-Octanone**



**106-68-3 : 3-Octanone  
Agonist: 0 Antagonist: 0**



1067-25-0 : Trimethoxypropylsilane



1067-25-0 : Trimethoxypropylsilane  
Agonist: 0 Antagonist: 0



1067-53-4 : Tris(2-methoxyethoxy)vinylsilane

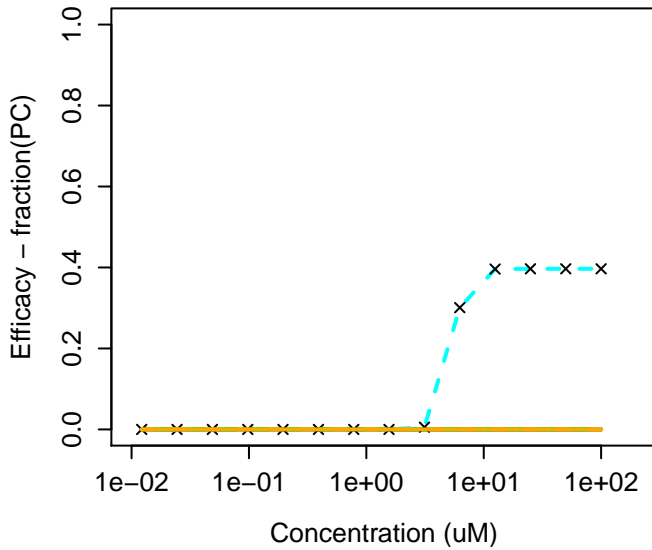

1067-53-4 : Tris(2-methoxyethoxy)vinylsilane  
Agonist: 0 Antagonist: 0



106-87-6 : 4-Vinyl-1-cyclohexene dioxide



106-87-6 : 4-Vinyl-1-cyclohexene dioxide  
Agonist: 0 Antagonist: 0



1068967-96-3 : SAR102608

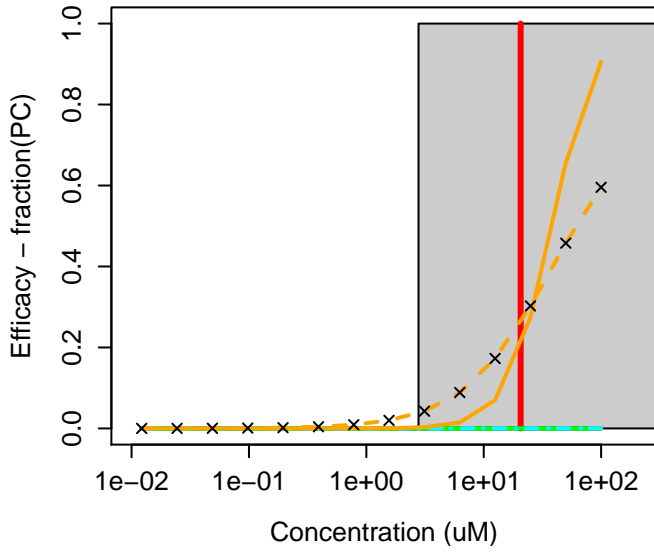

1068967-96-3 : SAR102608  
Agonist: 0 Antagonist: 0

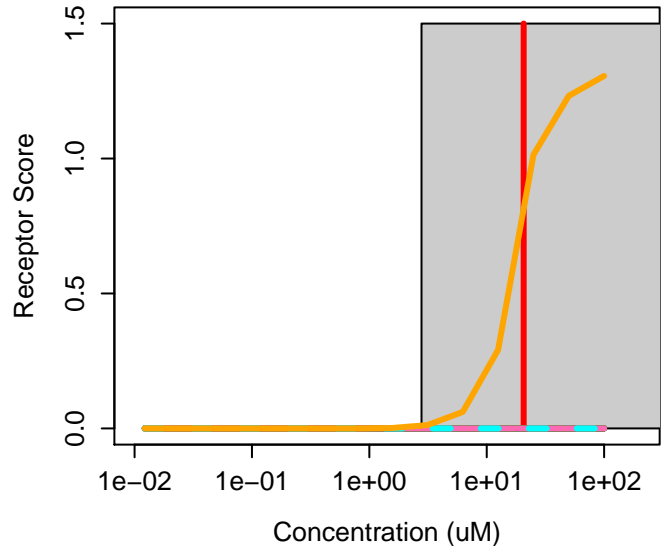

106-93-4 : 1,2-Dibromoethane

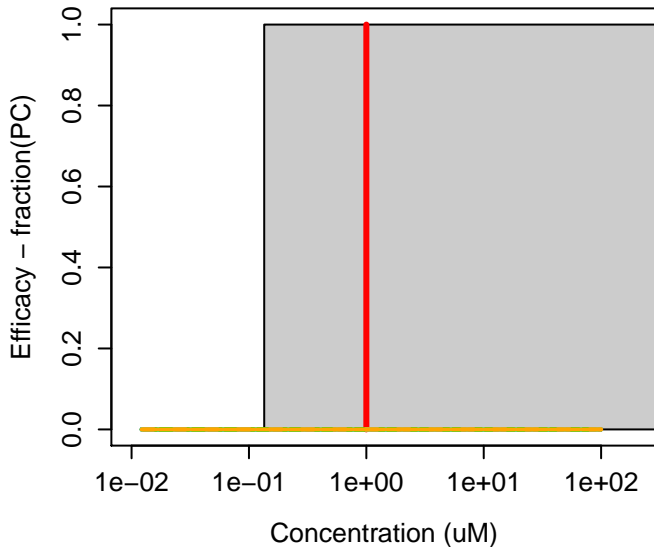

106-93-4 : 1,2-Dibromoethane  
Agonist: 0 Antagonist: 0

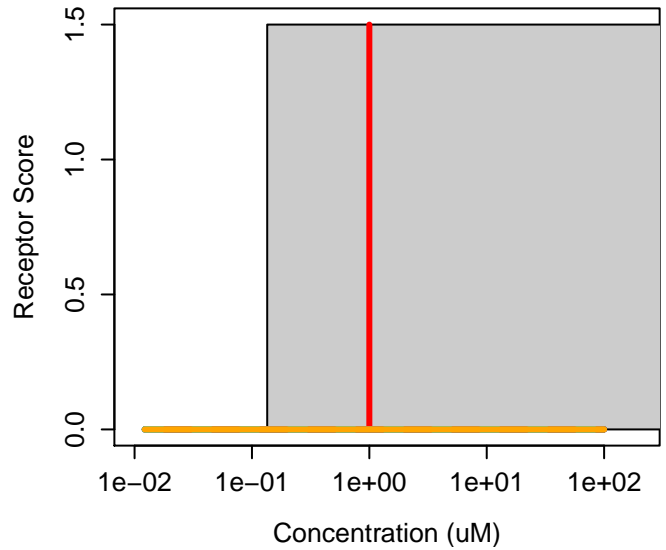

107071-66-9 : Ro 23-7637

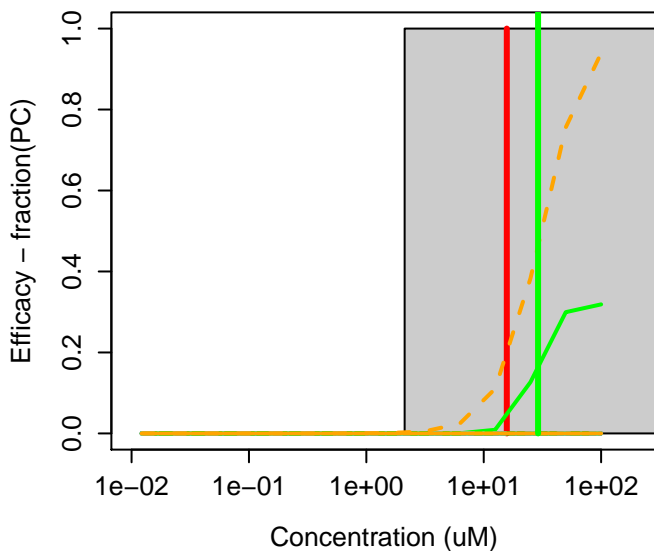

107071-66-9 : Ro 23-7637  
Agonist: 0 Antagonist: 0.037

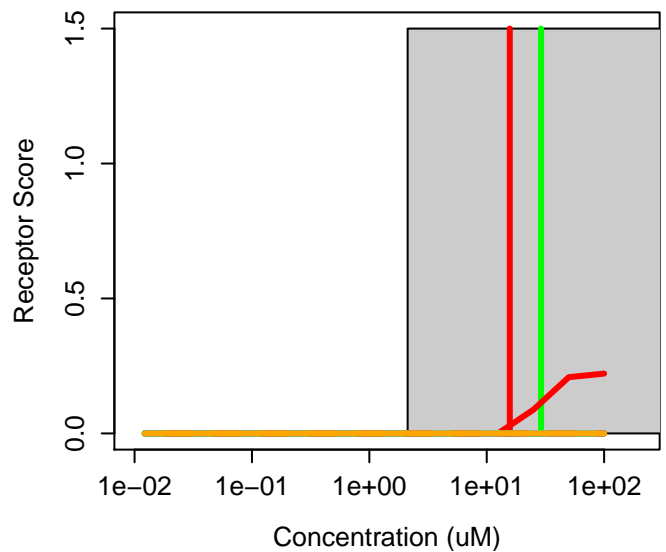

107-07-3 : 2-Chloroethanol



107-07-3 : 2-Chloroethanol  
Agonist: 0 Antagonist: 0



107-13-1 : Acrylonitrile

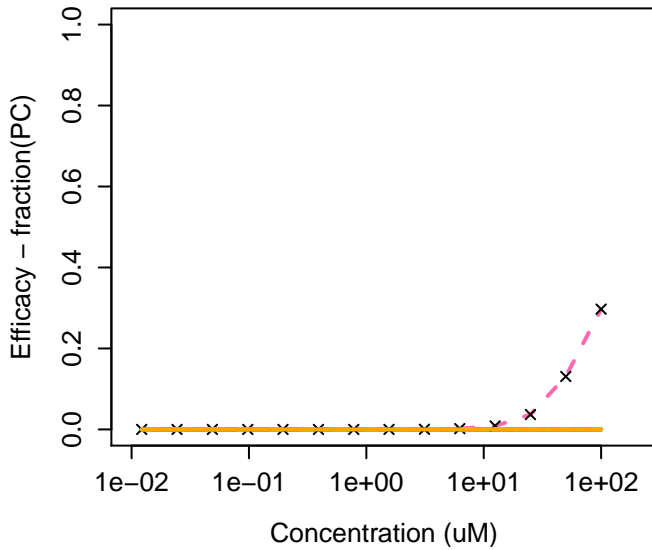

107-13-1 : Acrylonitrile  
Agonist: 0 Antagonist: 0

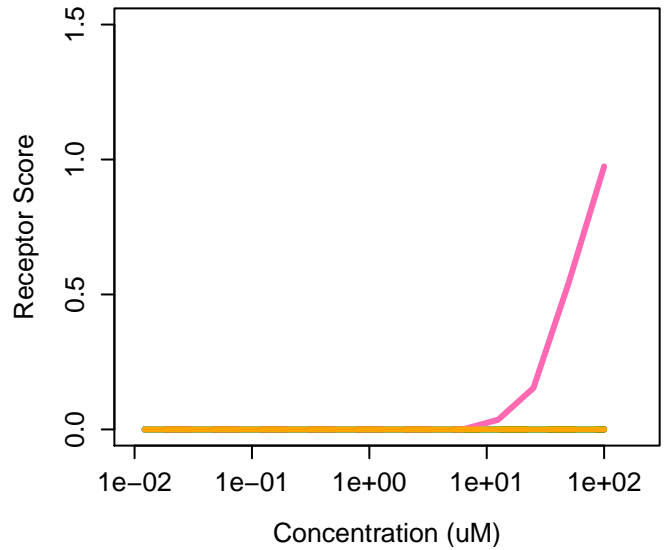

107-18-6 : Allyl alcohol



107-18-6 : Allyl alcohol  
Agonist: 0 Antagonist: 0



**107-20-0 : Chloroacetaldehyde**



**107-20-0 : Chloroacetaldehyde  
Agonist: 0 Antagonist: 0**



**107-21-1 : Ethylene glycol**



**107-21-1 : Ethylene glycol  
Agonist: 0 Antagonist: 0**



**1072-15-7 : Sulfuric acid, mononyl ester, sodium 1072-15-7 : Sulfuric acid, mononyl ester, sodium  
Agonist: 0 Antagonist: 0**



107-30-2 : Chloromethyl methyl ether

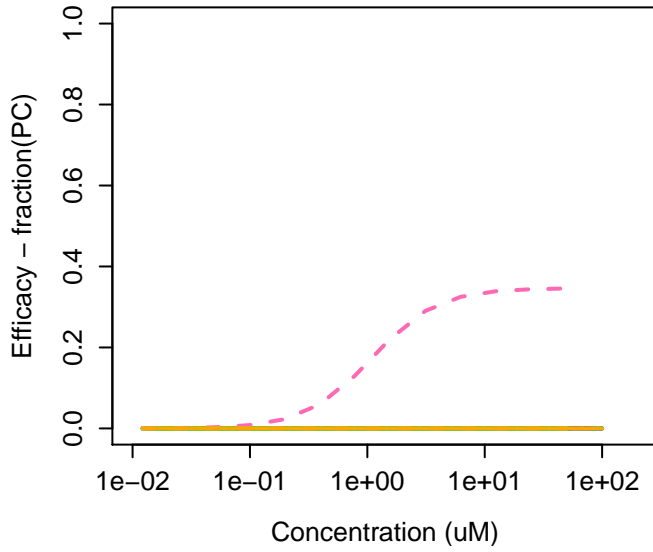

107-30-2 : Chloromethyl methyl ether  
Agonist: 0 Antagonist: 0

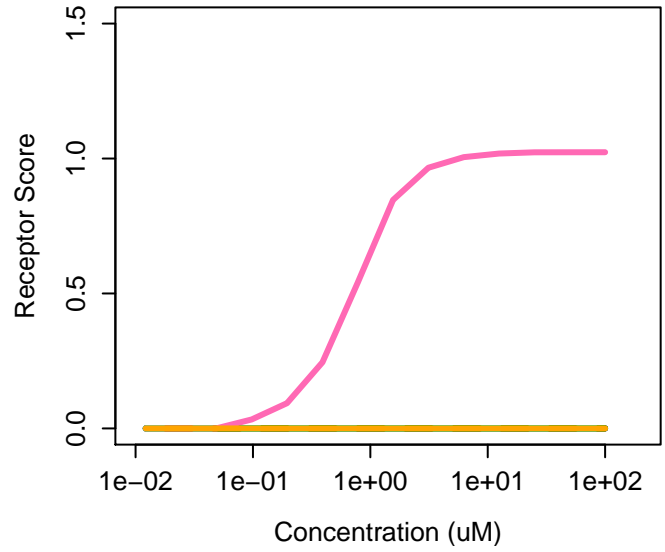

107-41-5 : 2-Methyl-2,4-pentanediol

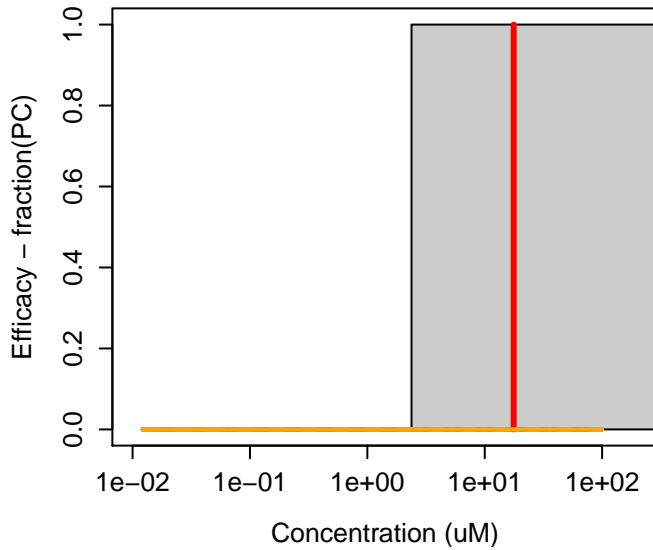

107-41-5 : 2-Methyl-2,4-pentanediol  
Agonist: 0 Antagonist: 0

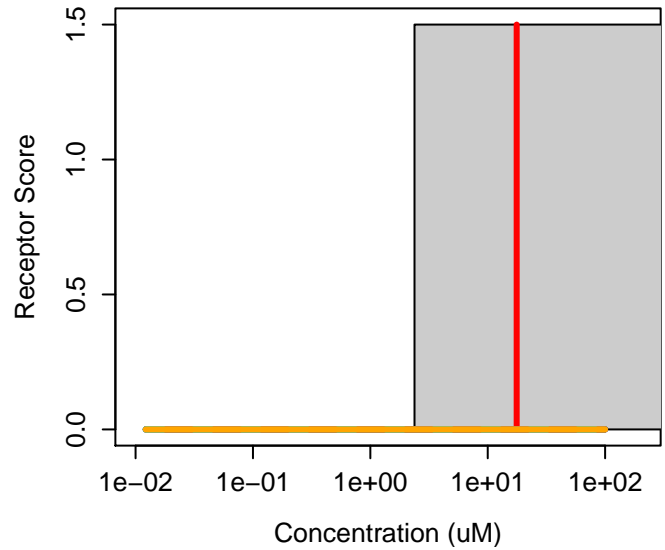

107-46-0 : Hexamethyldisiloxane

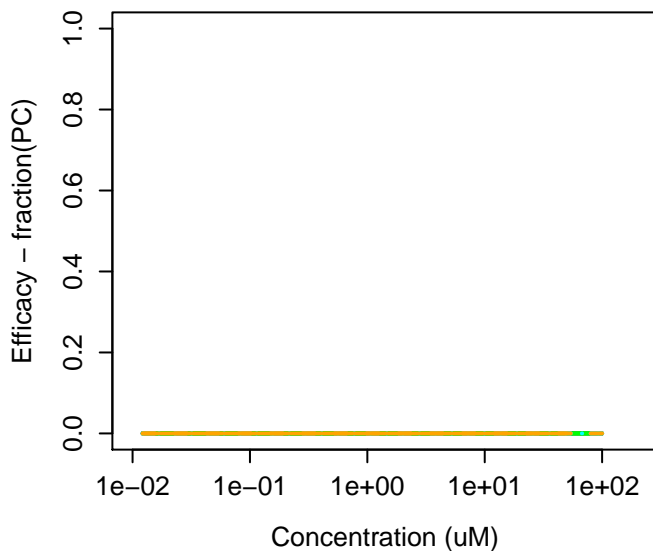

107-46-0 : Hexamethyldisiloxane  
Agonist: 0 Antagonist: 0

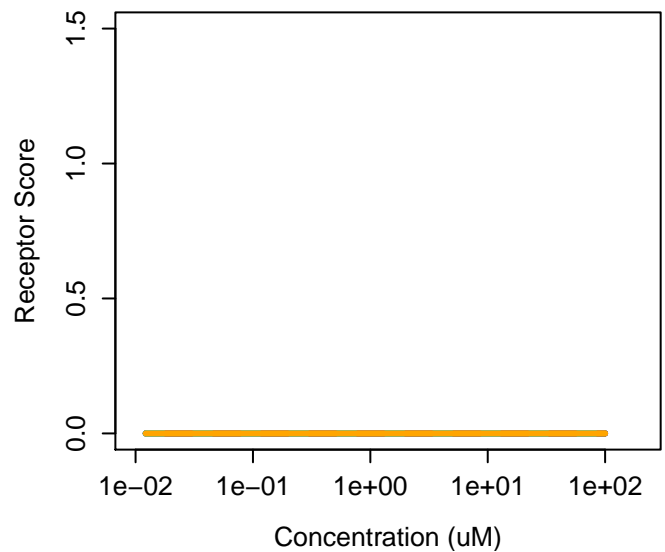



107-51-7 : Octamethyltrisiloxane



107-51-7 : Octamethyltrisiloxane  
Agonist: 0 Antagonist: 0



107534-96-3 : Tebuconazole

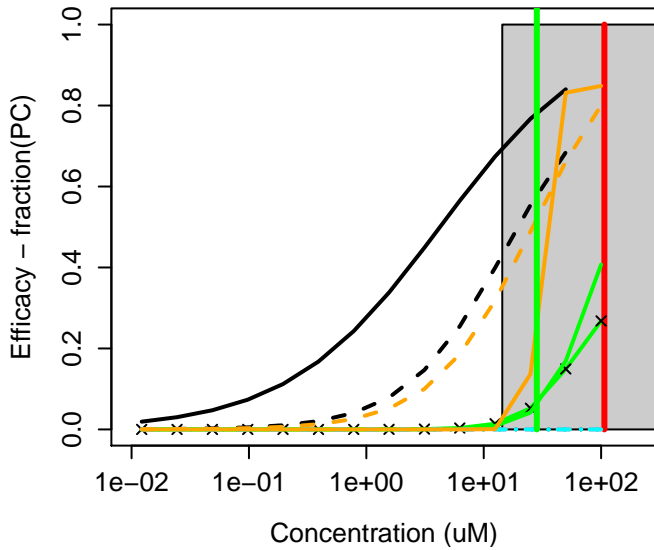

107534-96-3 : Tebuconazole  
Agonist: 0 Antagonist: 0.3

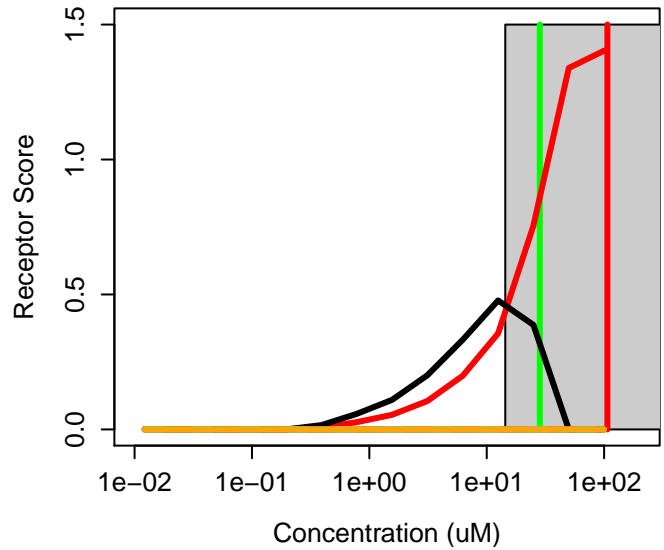

107-54-0 : 3,5-Dimethyl-1-hexyn-3-ol



107-54-0 : 3,5-Dimethyl-1-hexyn-3-ol  
Agonist: 0 Antagonist: 0

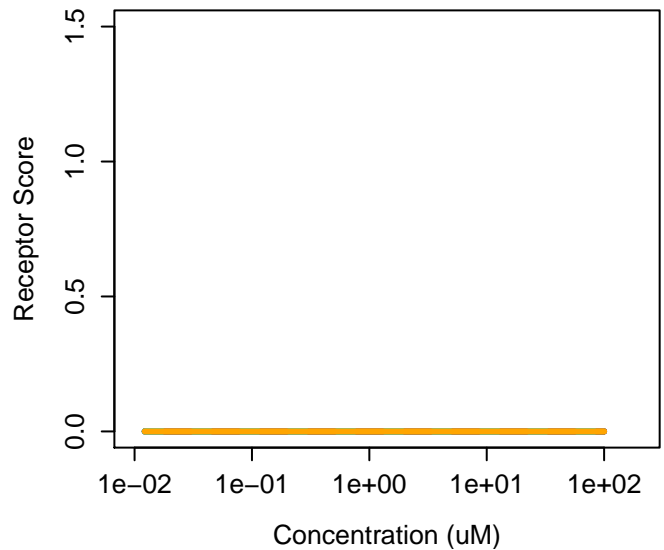

1076-97-7 : 1,4-Cyclohexanedicarboxylic acid

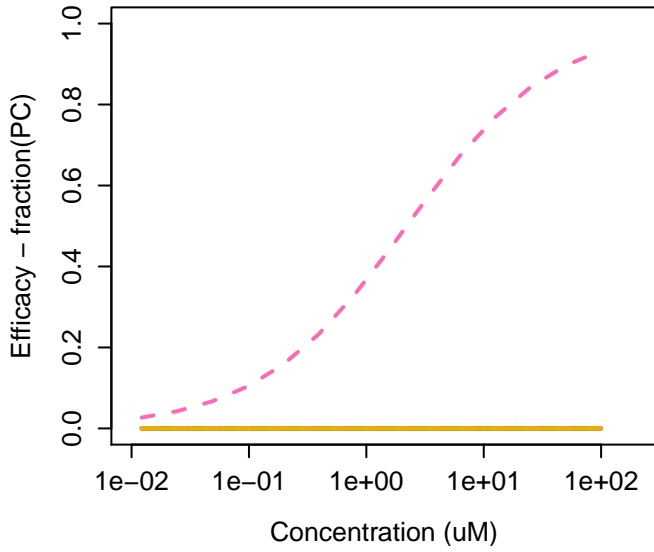

1076-97-7 : 1,4-Cyclohexanedicarboxylic acid  
Agonist: 0 Antagonist: 0

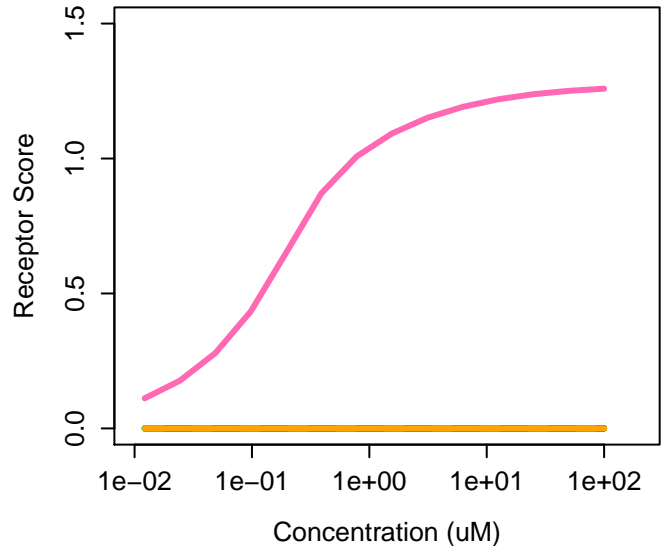

107-75-5 : 7-Hydroxy-3,7-dimethyloctanal



107-75-5 : 7-Hydroxy-3,7-dimethyloctanal  
Agonist: 0 Antagonist: 0



107-87-9 : 2-Pentanone



107-87-9 : 2-Pentanone  
Agonist: 0 Antagonist: 0



**107-88-0 : 1,3-Butanediol**



**107-88-0 : 1,3-Butanediol  
Agonist: 0 Antagonist: 0**



**107-92-6 : Butanoic acid**



**107-92-6 : Butanoic acid  
Agonist: 0 Antagonist: 0**



**107-98-2 : 1-Methoxy-2-propanol**

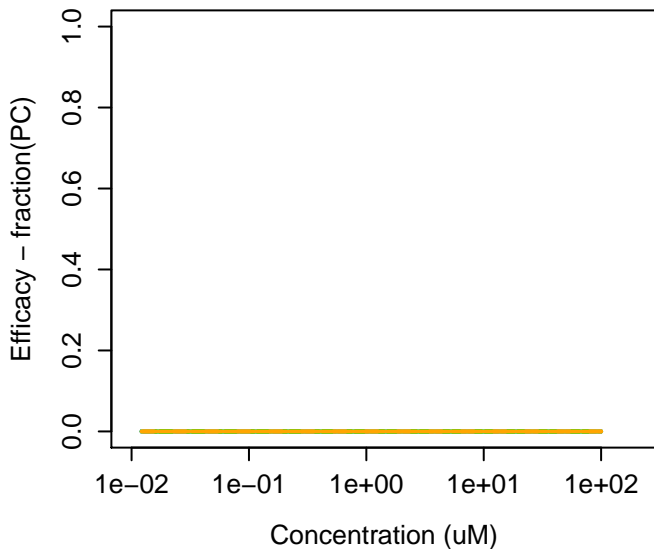

**107-98-2 : 1-Methoxy-2-propanol  
Agonist: 0 Antagonist: 0**



108-01-0 : Dimethylaminoethanol

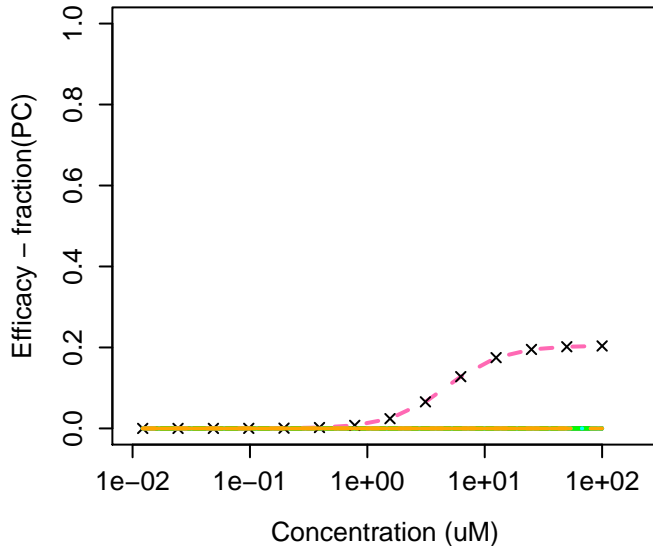

108-01-0 : Dimethylaminoethanol  
Agonist: 0 Antagonist: 0

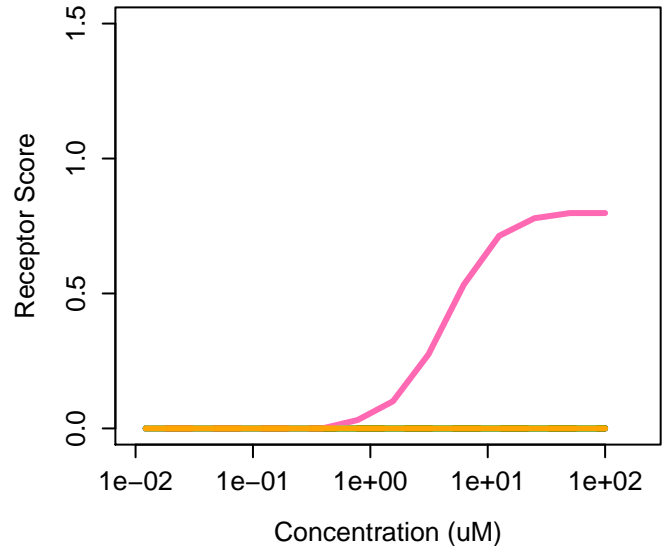

108-11-2 : 4-Methyl-2-pentanol



108-11-2 : 4-Methyl-2-pentanol  
Agonist: 0 Antagonist: 0



108-21-4 : Isopropyl acetate



108-21-4 : Isopropyl acetate  
Agonist: 0 Antagonist: 0



**108-32-7 : Propylene carbonate**



**108-32-7 : Propylene carbonate  
Agonist: 0 Antagonist: 0**



**108-38-3 : m-Xylene**

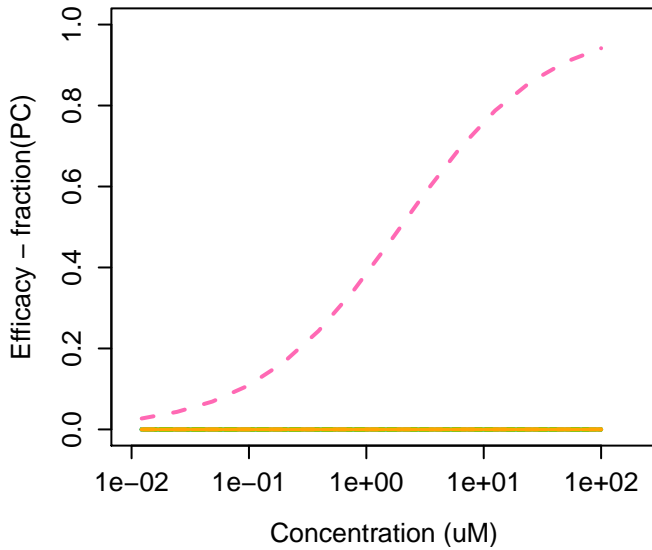

**108-38-3 : m-Xylene  
Agonist: 0.00014 Antagonist: 0**

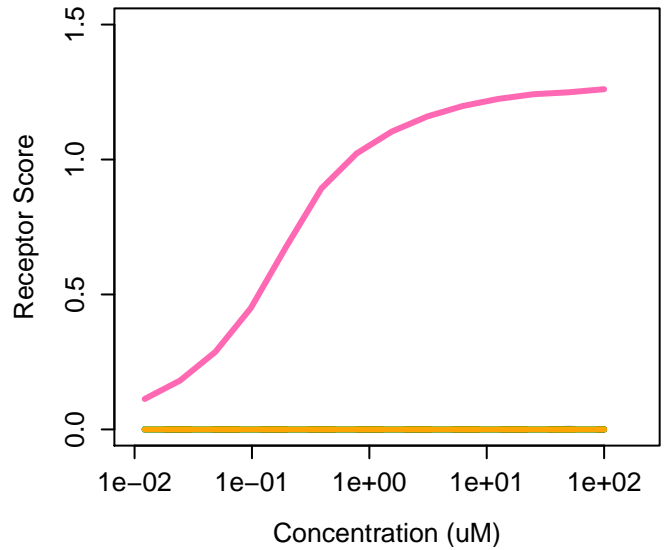

**108-39-4 : m-Cresol**



**108-39-4 : m-Cresol  
Agonist: 0 Antagonist: 0**



419-33-6 : Acetic acid, C8-10-branched alkyl esters, 419-33-6 : Acetic acid, C8-10-branched alkyl esters,  
Agonist: 0 Antagonist: 0

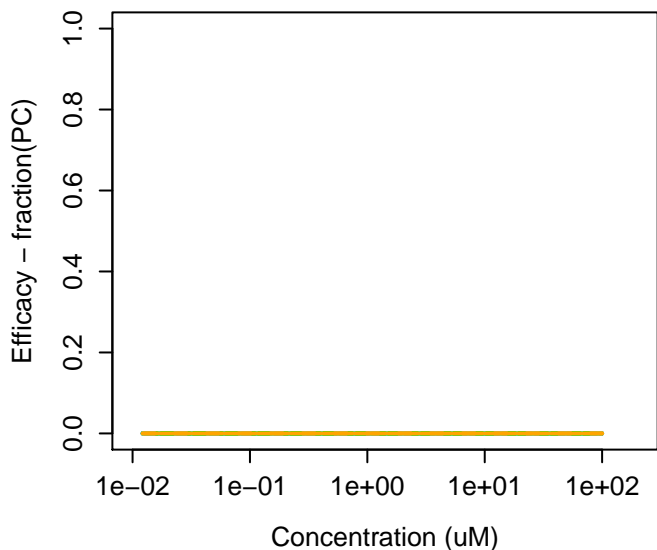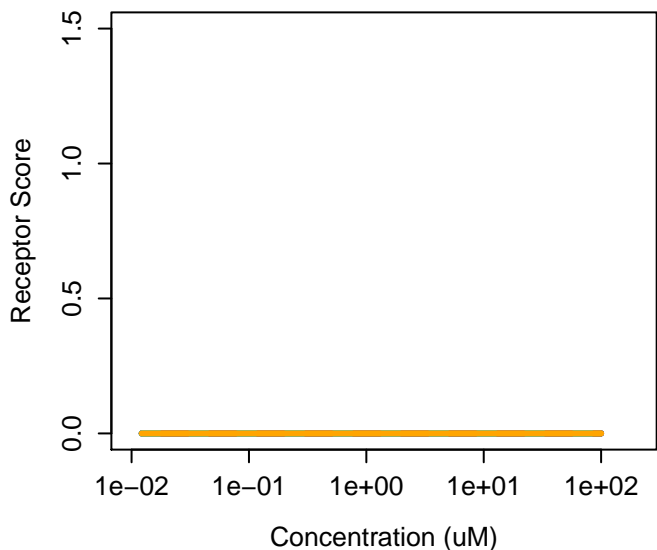

108-44-1 : 3-Methylaniline

108-44-1 : 3-Methylaniline  
Agonist: 0 Antagonist: 0

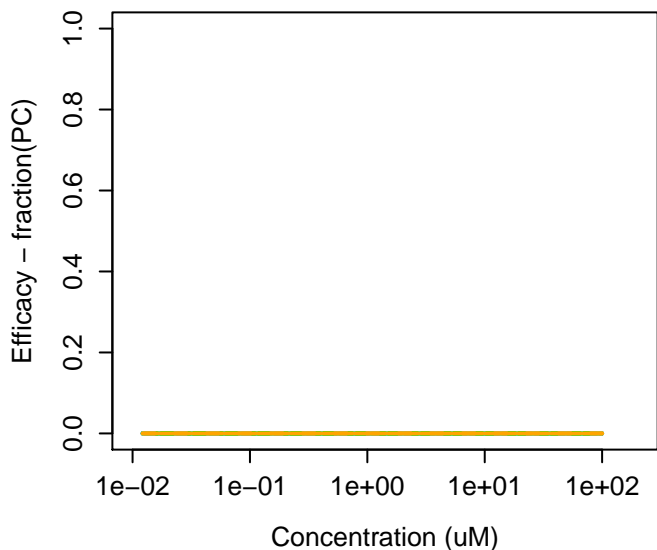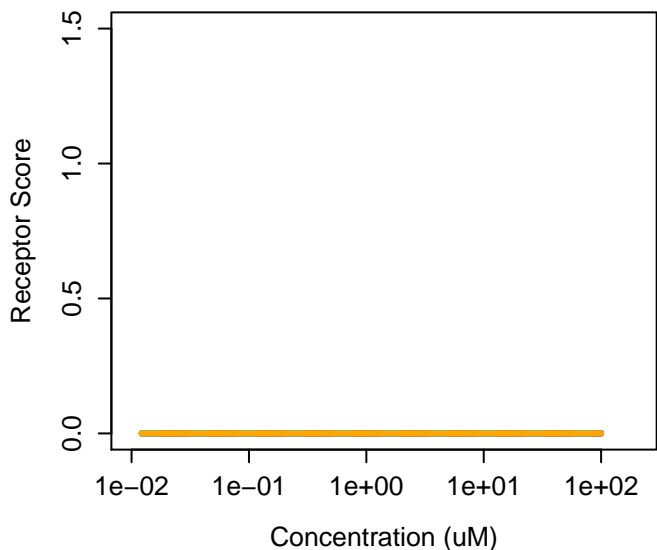

108-45-2 : 1,3-Benzenediamine

108-45-2 : 1,3-Benzenediamine  
Agonist: 0 Antagonist: 0

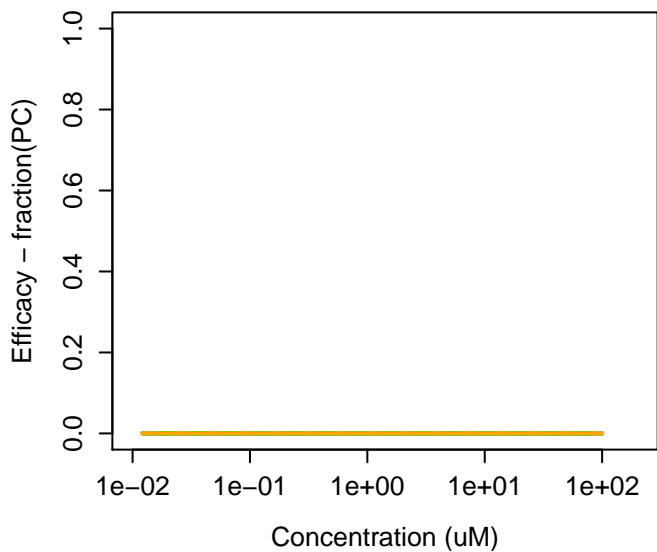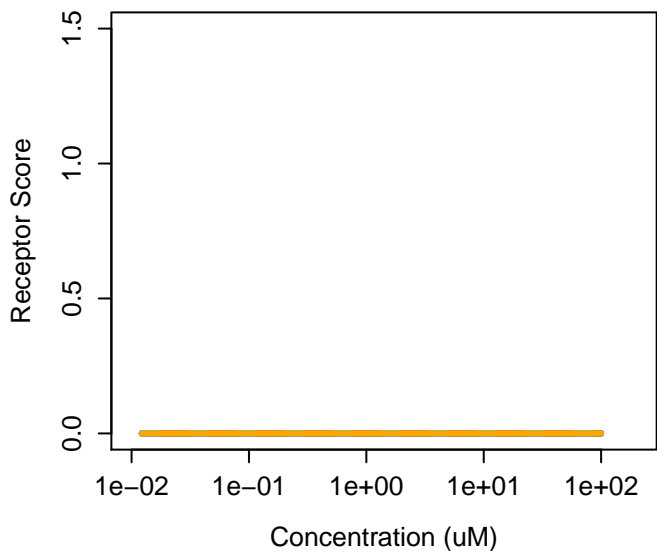

108-46-3 : Resorcinol

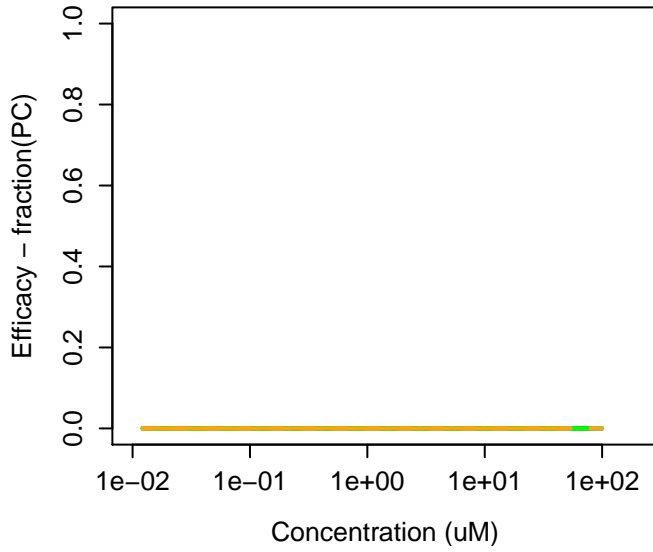

108-46-3 : Resorcinol  
Agonist: 0 Antagonist: 0



1085-12-7 : Heptylparaben

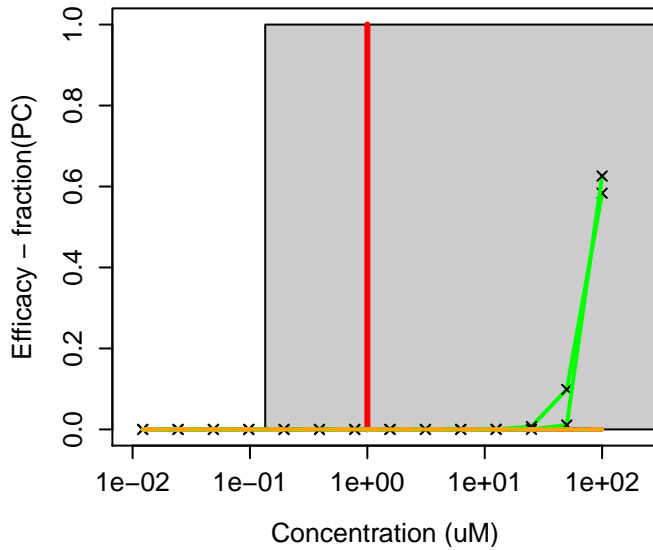

1085-12-7 : Heptylparaben  
Agonist: 0 Antagonist: 0

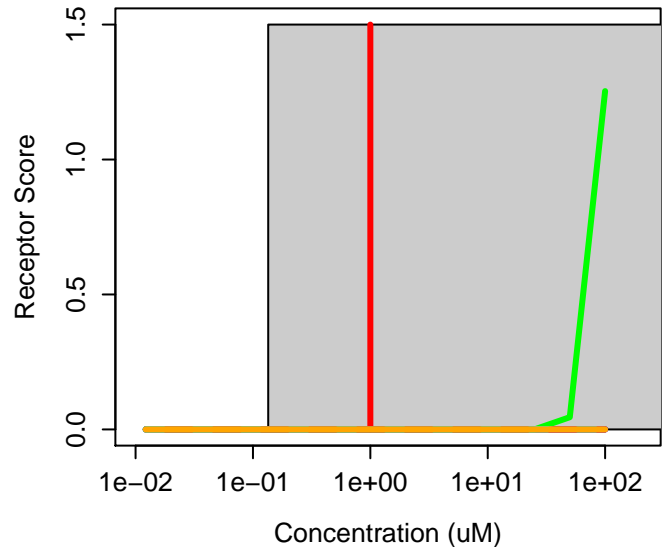

108-59-8 : Dimethyl malonate

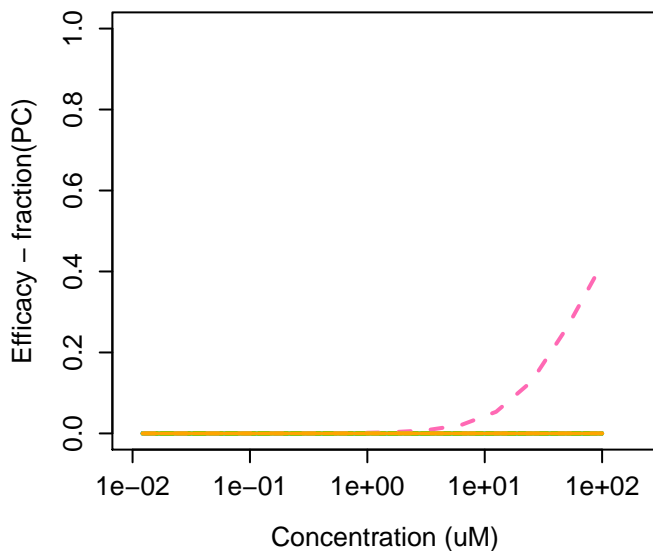

108-59-8 : Dimethyl malonate  
Agonist: 0 Antagonist: 0

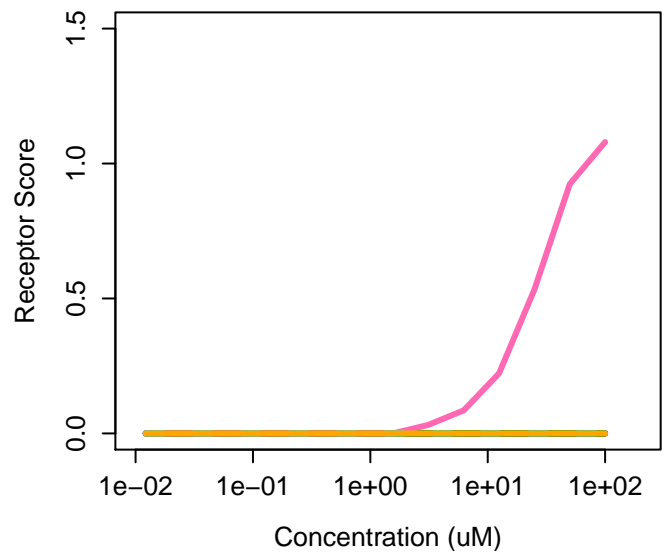

**108-67-8 : 1,3,5-Trimethylbenzene**

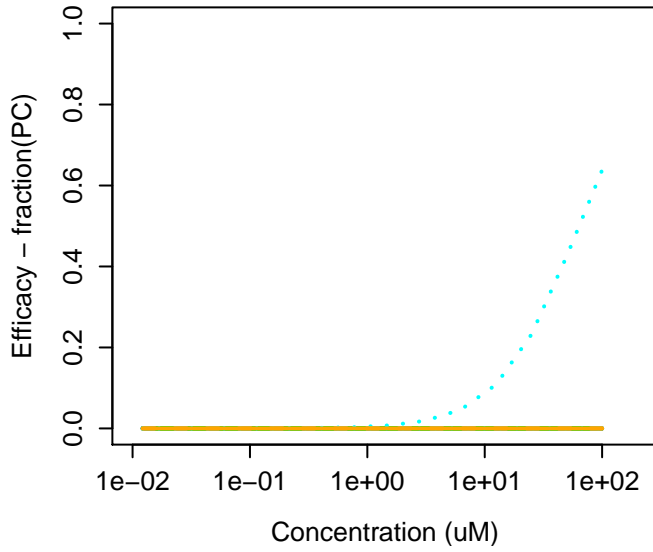

**108-67-8 : 1,3,5-Trimethylbenzene**  
**Agonist: 0 Antagonist: 0**



**108-68-9 : 3,5-Dimethylphenol**



**108-68-9 : 3,5-Dimethylphenol**  
**Agonist: 0 Antagonist: 0**



**108-77-0 : 2,4,6-Trichloro-s-triazine**



**108-77-0 : 2,4,6-Trichloro-s-triazine**  
**Agonist: 0 Antagonist: 0**





**108-80-5 : Cyanuric acid**

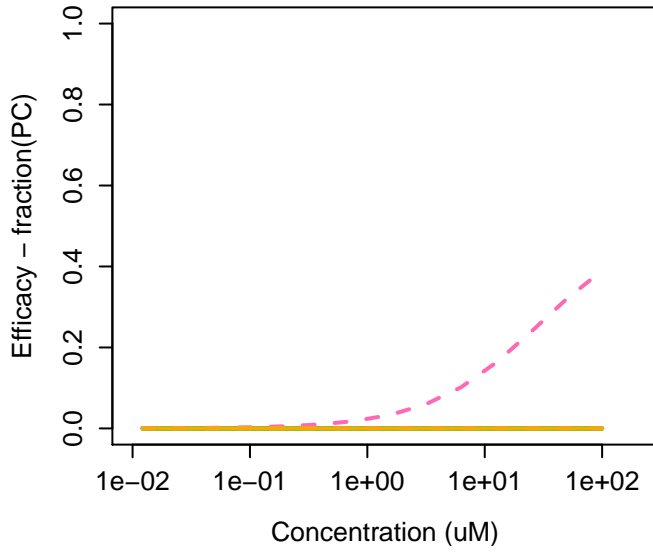

**108-80-5 : Cyanuric acid  
Agonist: 0 Antagonist: 0**

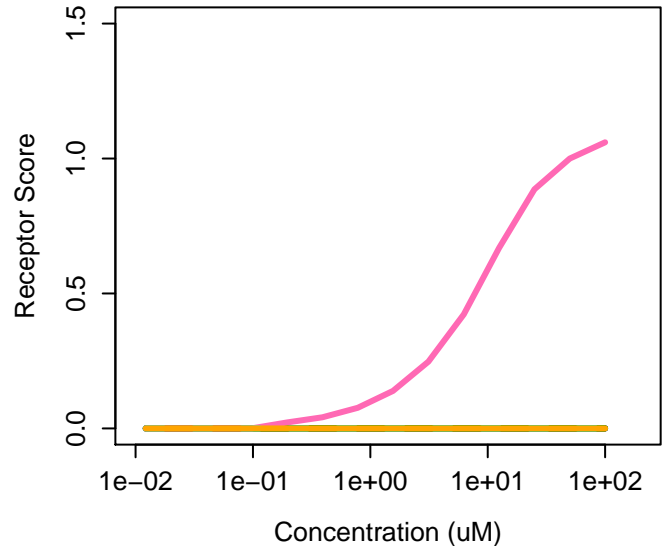

**108-83-8 : Diisobutyl ketone**



**108-83-8 : Diisobutyl ketone  
Agonist: 0 Antagonist: 0**



**108-91-8 : Cyclohexylamine**



**108-91-8 : Cyclohexylamine  
Agonist: 0 Antagonist: 0**



**108-93-0 : Cyclohexanol**



**108-93-0 : Cyclohexanol  
Agonist: 0 Antagonist: 0**



**108-94-1 : Cyclohexanone**



**108-94-1 : Cyclohexanone  
Agonist: 0 Antagonist: 0**



**108-95-2 : Phenol**

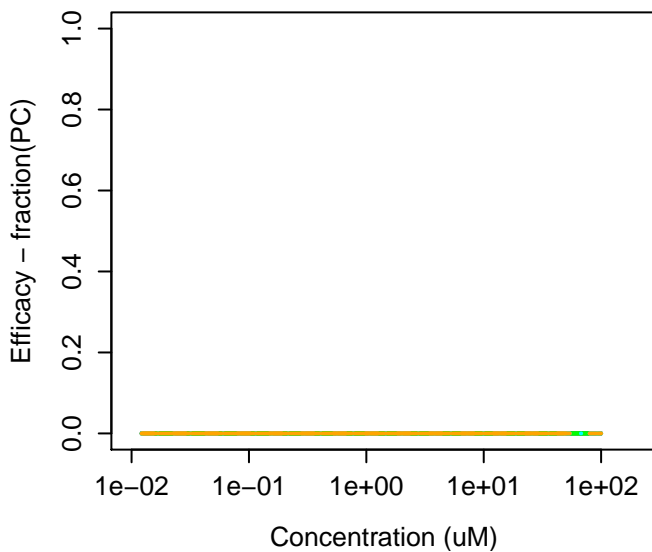

**108-95-2 : Phenol  
Agonist: 0 Antagonist: 0**



**108-98-5 : Benzenethiol**



**108-98-5 : Benzenethiol  
Agonist: 0 Antagonist: 0**



**108-99-6 : 3-Methylpyridine**



**108-99-6 : 3-Methylpyridine  
Agonist: 0 Antagonist: 0**



**109-02-4 : 4-Methylmorpholine**

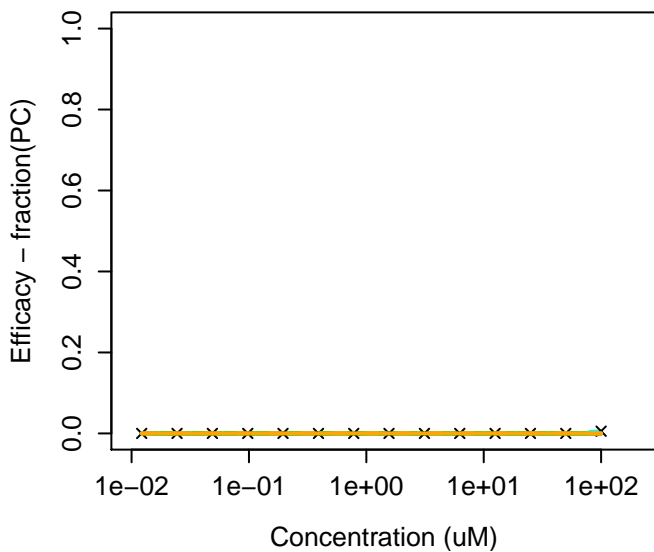

**109-02-4 : 4-Methylmorpholine  
Agonist: 0 Antagonist: 0**



**109-43-3 : Dibutyl decanedioate**



**109-43-3 : Dibutyl decanedioate  
Agonist: 0 Antagonist: 0**



**109-46-6 : N,N'-Dibutylthiourea**

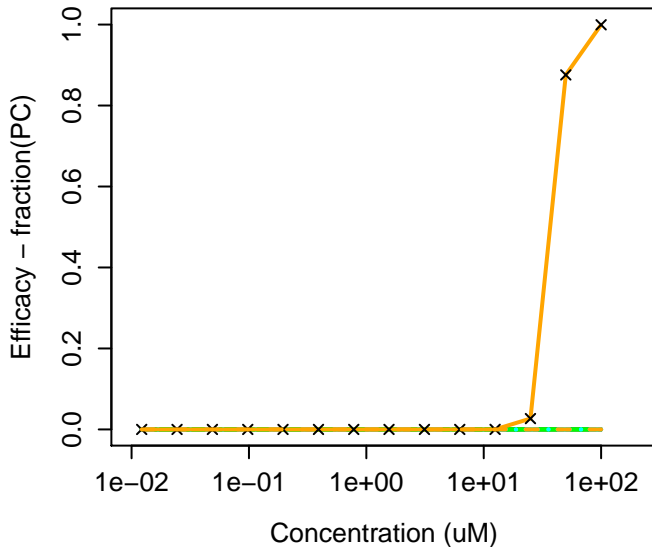

**109-46-6 : N,N'-Dibutylthiourea  
Agonist: 0 Antagonist: 0**

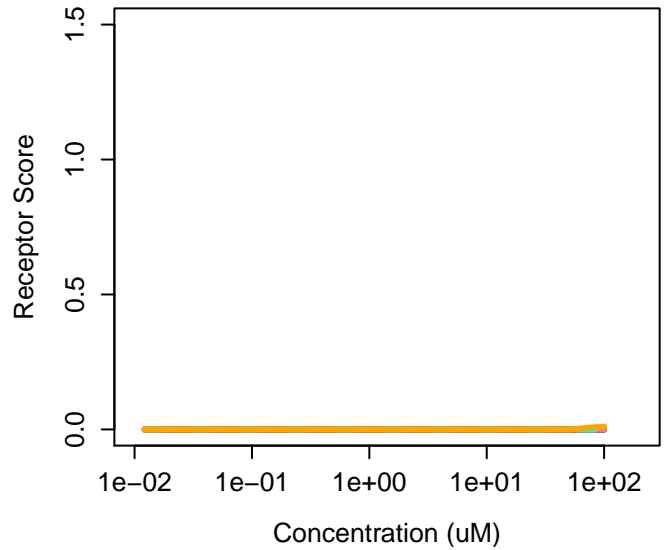

**109-52-4 : Pentanoic acid**

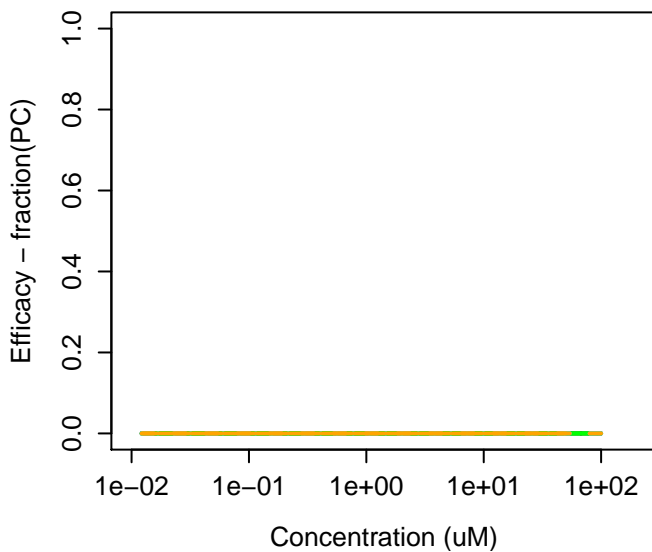

**109-52-4 : Pentanoic acid  
Agonist: 0 Antagonist: 0**

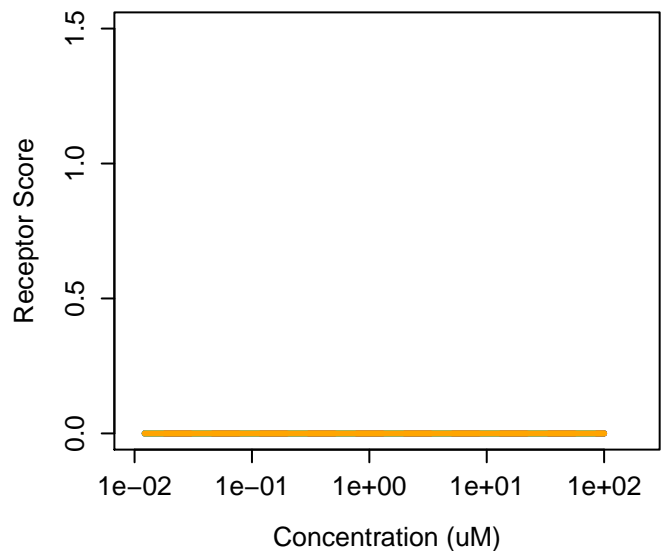

109-55-7 : 3-(Dimethylamino)propylamine



109-55-7 : 3-(Dimethylamino)propylamine  
Agonist: 0 Antagonist: 0



1095-90-5 : Methadone hydrochloride

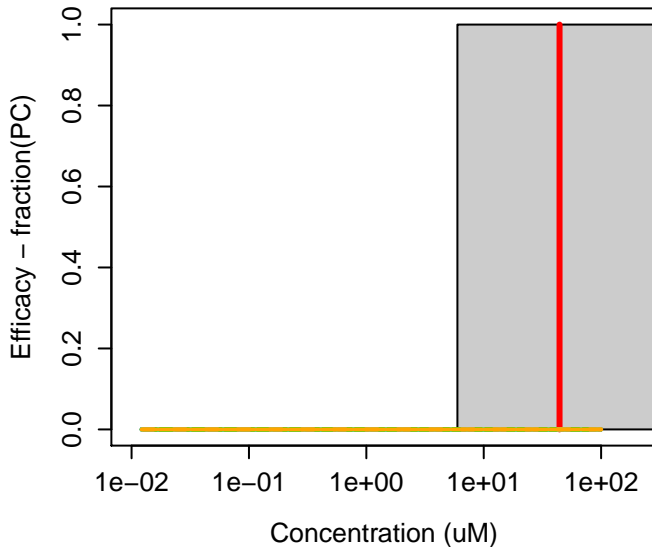

1095-90-5 : Methadone hydrochloride  
Agonist: 0 Antagonist: 0

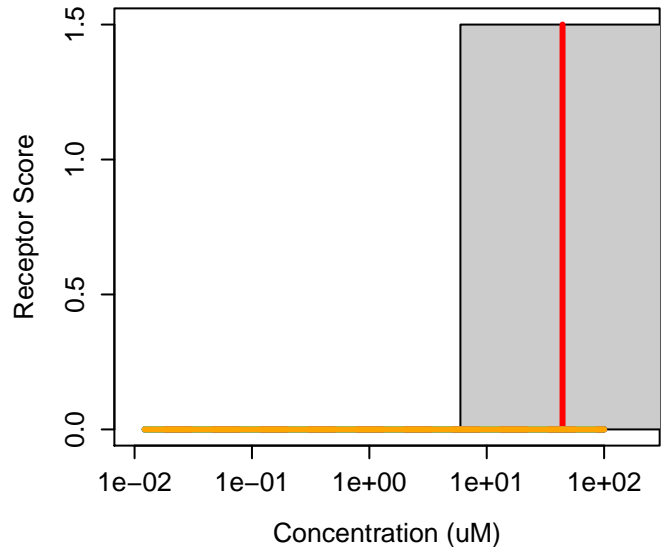

109-77-3 : Propanedinitrile

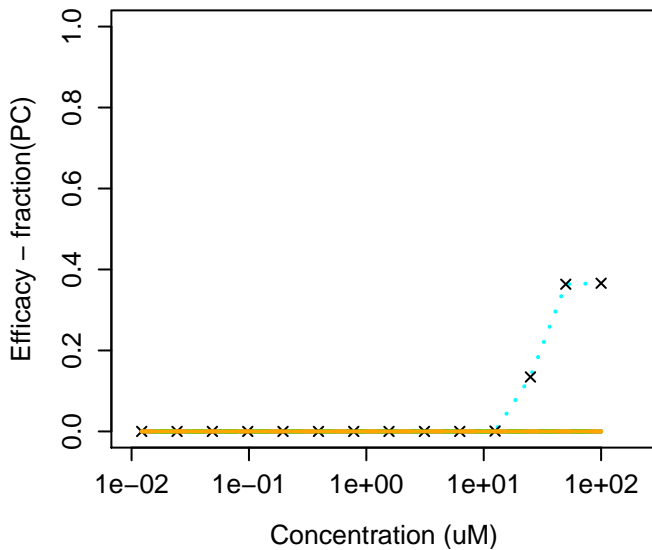

109-77-3 : Propanedinitrile  
Agonist: 0 Antagonist: 0



**109-86-4 : 2-Methoxyethanol**



**109-86-4 : 2-Methoxyethanol  
Agonist: 0 Antagonist: 0**



**110-05-4 : Di-tert-butyl peroxide**

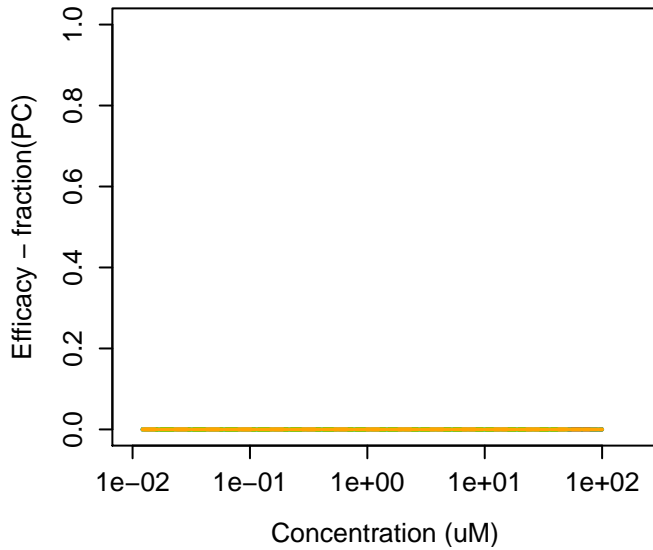

**110-05-4 : Di-tert-butyl peroxide  
Agonist: 0 Antagonist: 0**



**110-12-3 : 5-Methyl-2-hexanone**

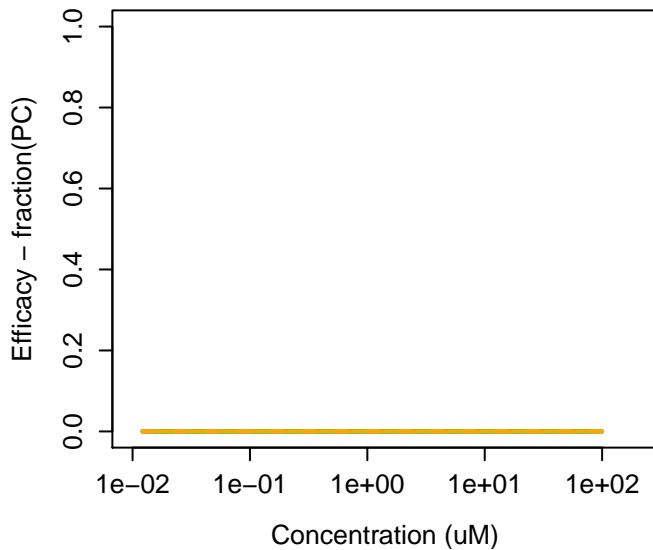

**110-12-3 : 5-Methyl-2-hexanone  
Agonist: 0 Antagonist: 0**



**110-15-6 : Butanedioic acid**

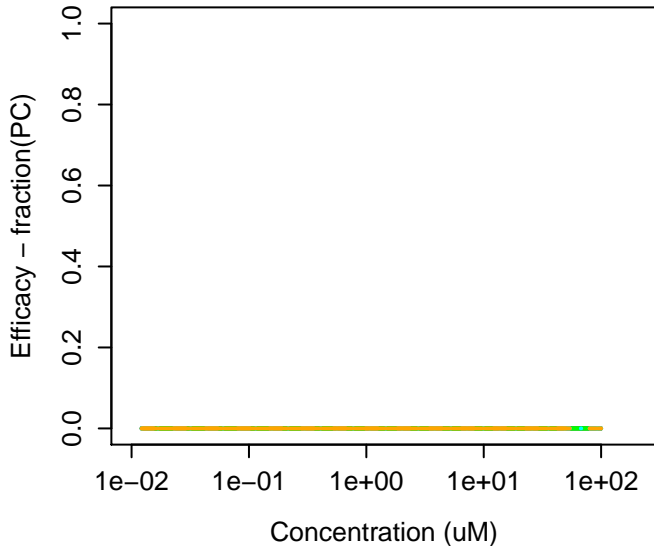

**110-15-6 : Butanedioic acid  
Agonist: 0 Antagonist: 0**



**110-16-7 : Maleic acid**



**110-16-7 : Maleic acid  
Agonist: 0 Antagonist: 0**



**110-17-8 : Fumaric acid**



**110-17-8 : Fumaric acid  
Agonist: 0 Antagonist: 0**



110235-47-7 : Mepanipyrim

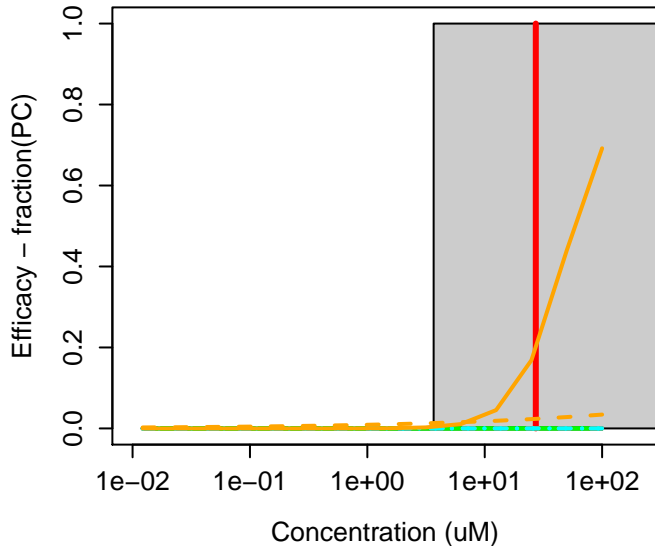

110235-47-7 : Mepanipyrim  
Agonist: 0 Antagonist: 0

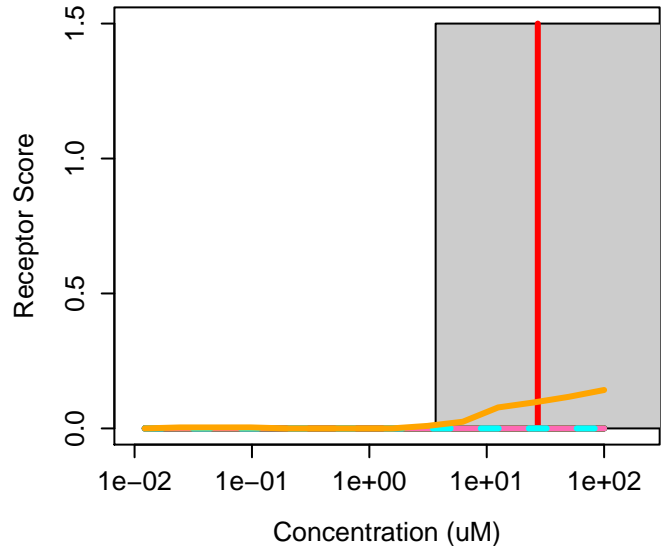

110-25-8 : Oleyl sarcosine

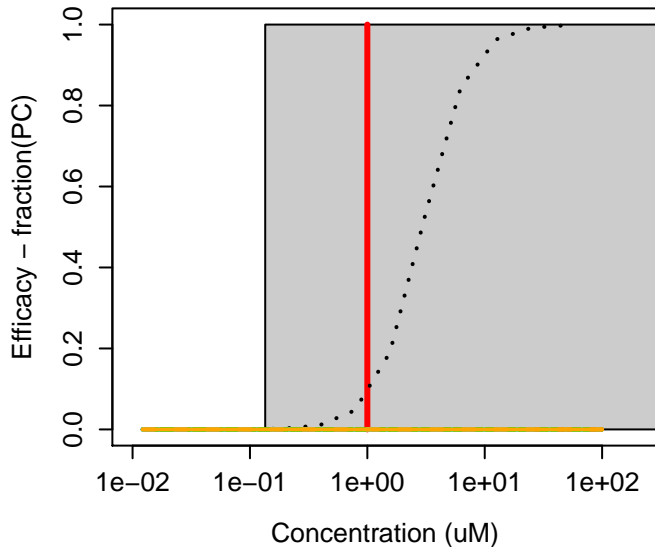

110-25-8 : Oleyl sarcosine  
Agonist: 6e-05 Antagonist: 0.00011

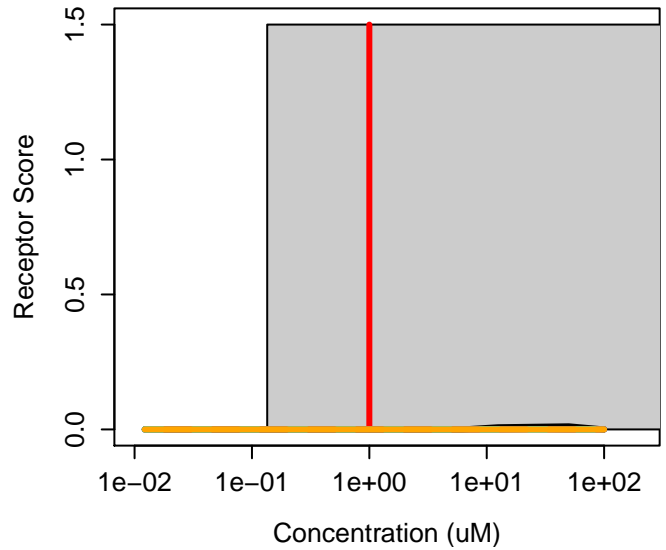

110-26-9 : N,N'-Methylenebisacrylamide

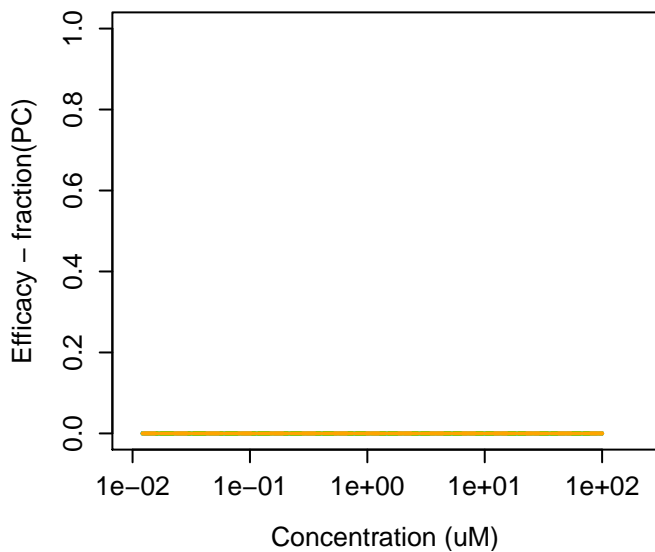

110-26-9 : N,N'-Methylenebisacrylamide  
Agonist: 0 Antagonist: 0





**110-27-0 : Isopropyl tetradecanoic acid**

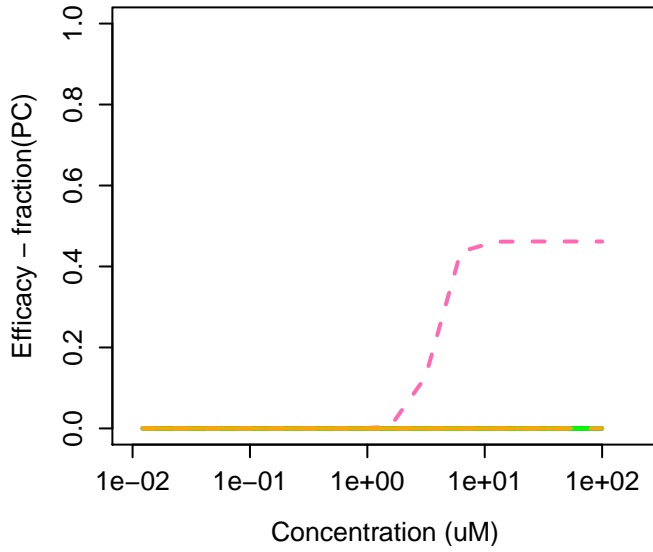

**110-27-0 : Isopropyl tetradecanoic acid  
Agonist: 0 Antagonist: 0**

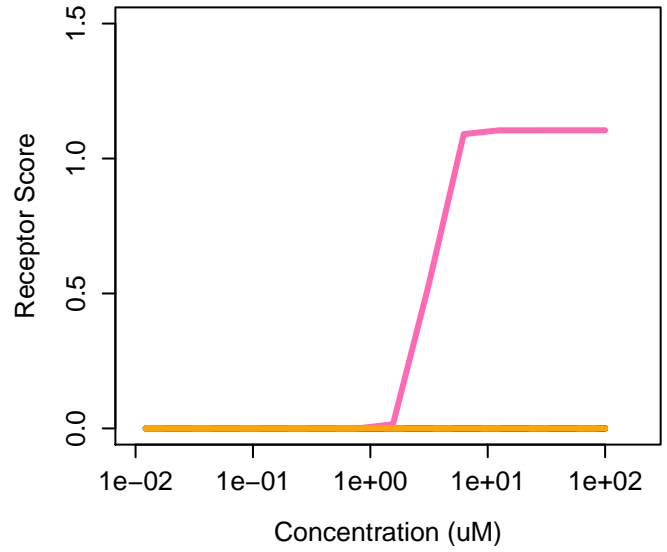

**110-33-8 : Dihexyl hexanedioate**

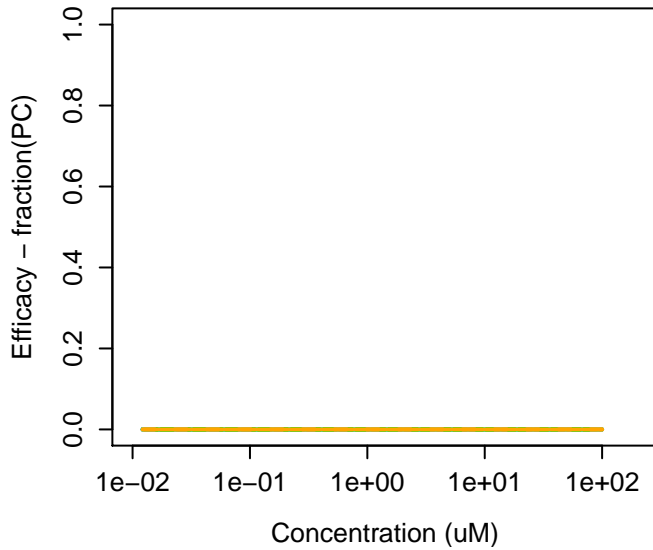

**110-33-8 : Dihexyl hexanedioate  
Agonist: 0 Antagonist: 0**



**110-42-9 : Methyl decanoate**



**110-42-9 : Methyl decanoate  
Agonist: 0 Antagonist: 0**



**110-43-0 : 2-Heptanone**

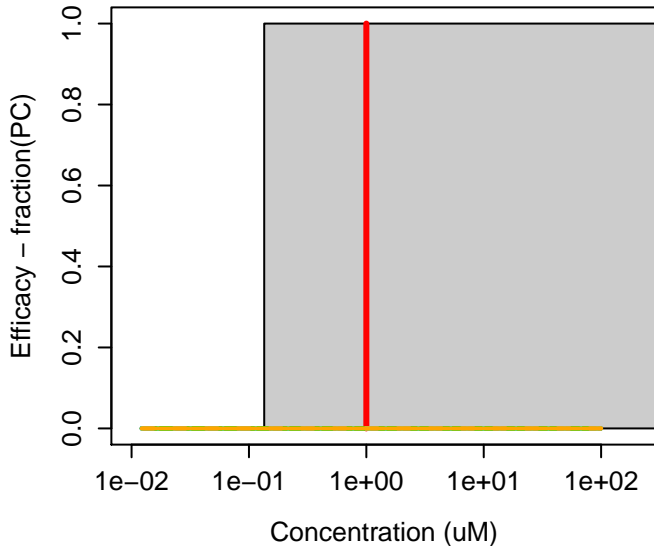

**110-43-0 : 2-Heptanone  
Agonist: 0 Antagonist: 0**



**110-44-1 : Sorbic acid**

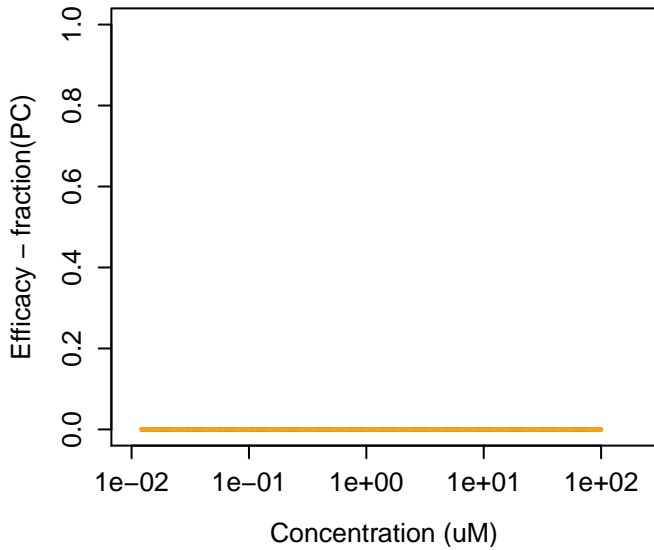

**110-44-1 : Sorbic acid  
Agonist: 0 Antagonist: 0**



**110488-70-5 : Dimethomorph**

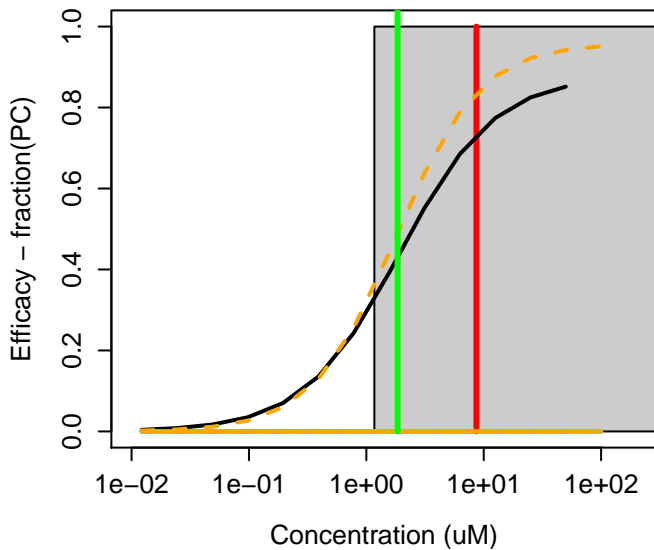

**110488-70-5 : Dimethomorph  
Agonist: 0 Antagonist: 0.24**

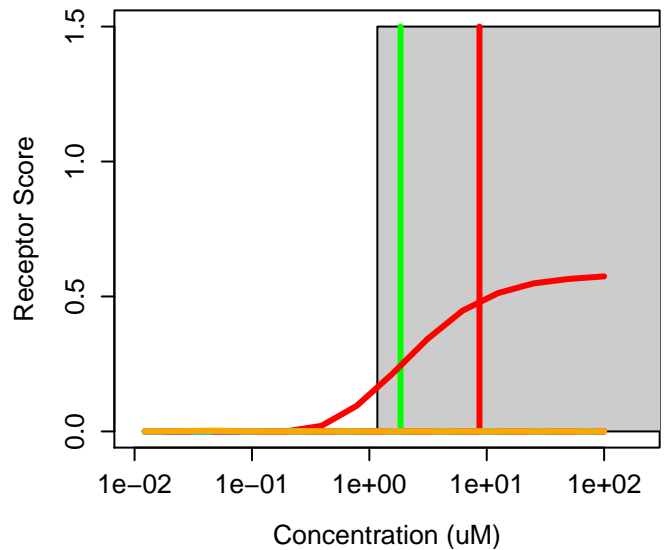

**110-62-3 : Pentanal**



**110-62-3 : Pentanal  
Agonist: 0 Antagonist: 0**



**110-63-4 : 1,4-Butanediol**



**110-63-4 : 1,4-Butanediol  
Agonist: 0 Antagonist: 0**



**110-65-6 : 2-Butyne-1,4-diol**



**110-65-6 : 2-Butyne-1,4-diol  
Agonist: 0 Antagonist: 0**



110-69-0 : Butanal oxime

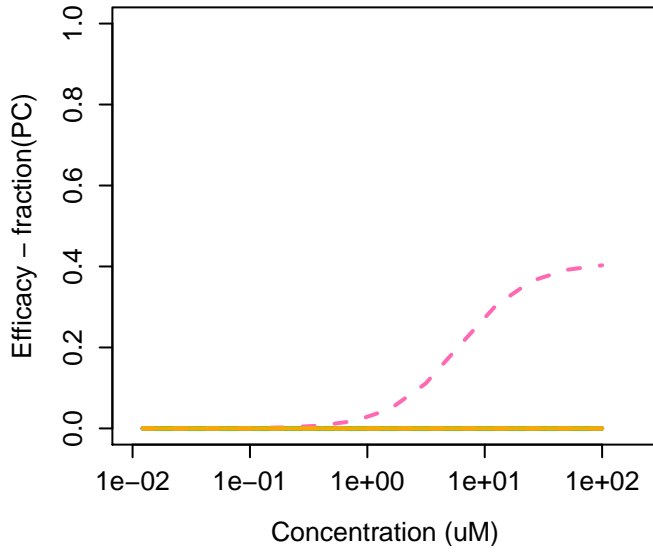

110-69-0 : Butanal oxime  
Agonist: 0 Antagonist: 0

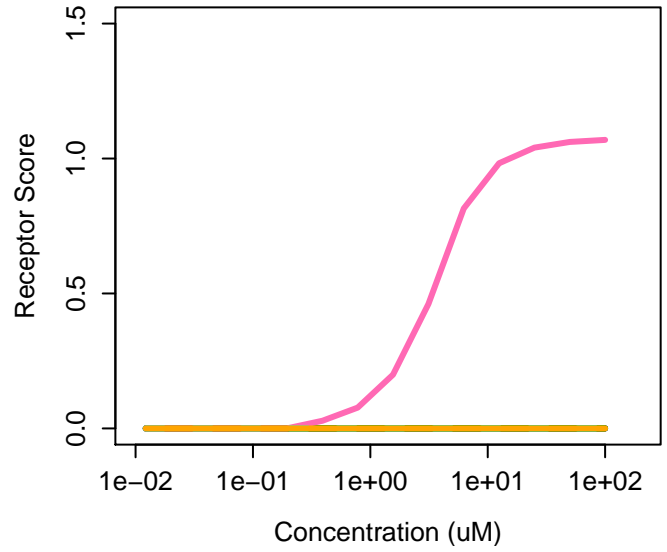

110-73-6 : 2-(Ethylamino)ethanol



110-73-6 : 2-(Ethylamino)ethanol  
Agonist: 0 Antagonist: 0



110-80-5 : 2-Ethoxyethanol

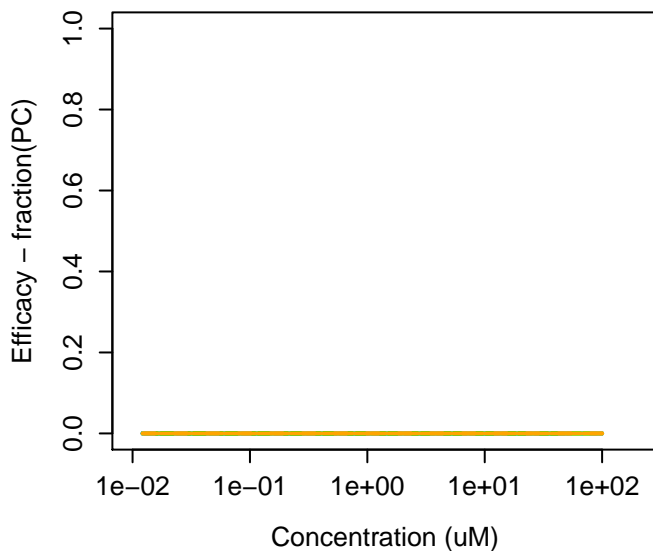

110-80-5 : 2-Ethoxyethanol  
Agonist: 0 Antagonist: 0



**110-85-0 : Piperazine**

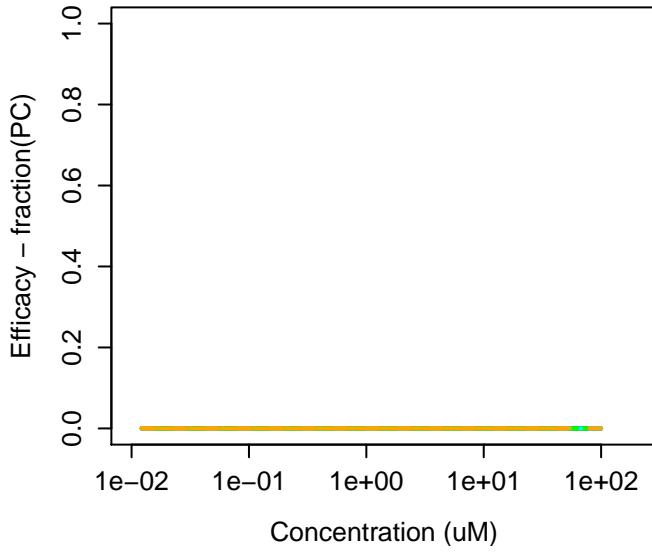

**110-85-0 : Piperazine  
Agonist: 0 Antagonist: 0**



**110-87-2 : 3,4-Dihydro-2H-pyran**



**110-87-2 : 3,4-Dihydro-2H-pyran  
Agonist: 0 Antagonist: 0**



**110-91-8 : Morpholine**



**110-91-8 : Morpholine  
Agonist: 0 Antagonist: 0**



**110-97-4 : Diisopropanolamine**

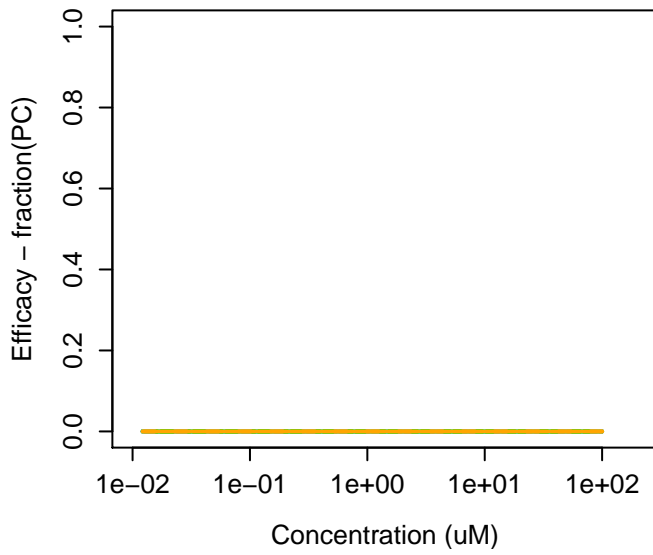

**110-97-4 : Diisopropanolamine  
Agonist: 0 Antagonist: 0**

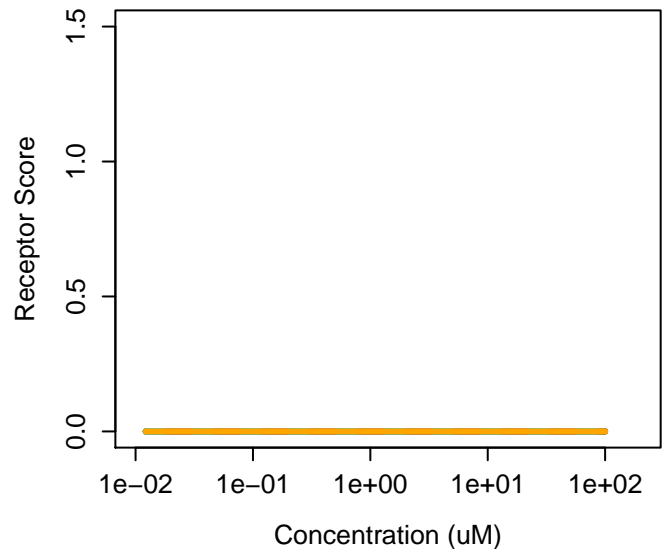

**11099-07-3 : Glyceryl stearates**

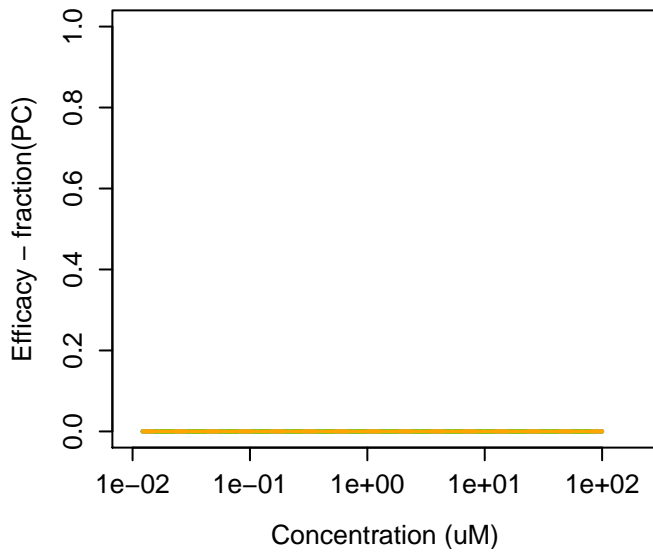

**11099-07-3 : Glyceryl stearates  
Agonist: 0 Antagonist: 0**

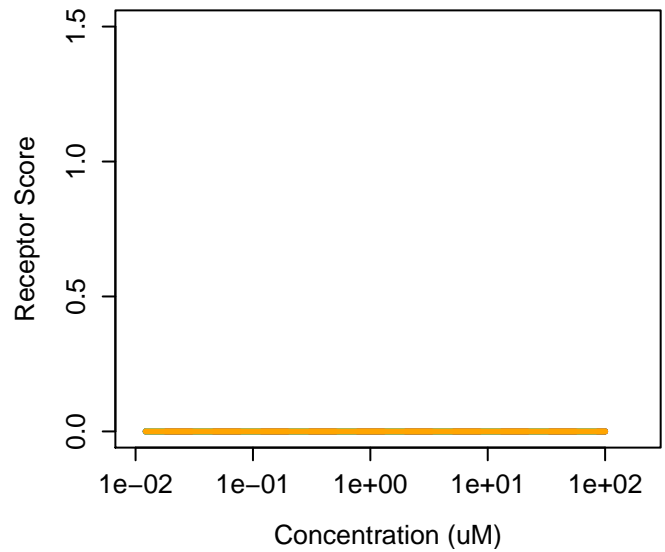

**111-11-5 : Methyl octanoate**



**111-11-5 : Methyl octanoate  
Agonist: 0 Antagonist: 0**



111-14-8 : Heptanoic acid



111-14-8 : Heptanoic acid  
Agonist: 0 Antagonist: 0



111-15-9 : 2-Ethoxyethyl acetate



111-15-9 : 2-Ethoxyethyl acetate  
Agonist: 0 Antagonist: 0



1111-78-0 : Ammonium carbamate

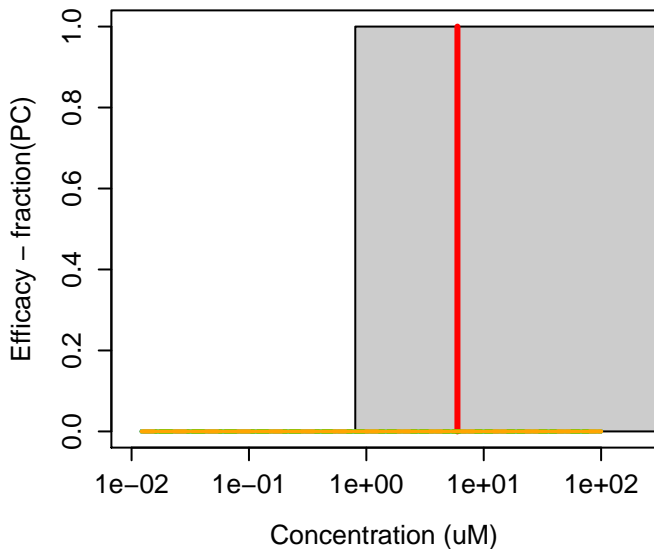

1111-78-0 : Ammonium carbamate  
Agonist: 0 Antagonist: 0

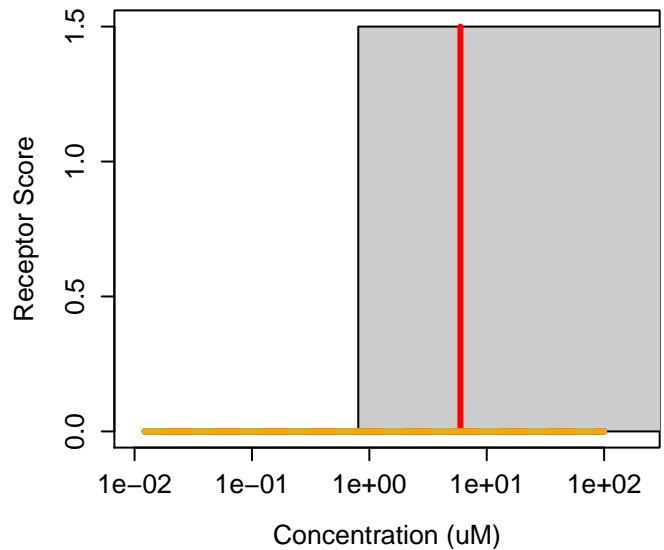

111-20-6 : Decanedioic acid



111-20-6 : Decanedioic acid  
Agonist: 0 Antagonist: 0



111-21-7 : Triethylene glycol diacetate



111-21-7 : Triethylene glycol diacetate  
Agonist: 0 Antagonist: 0



1112-39-6 : Dimethoxydimethylsilane

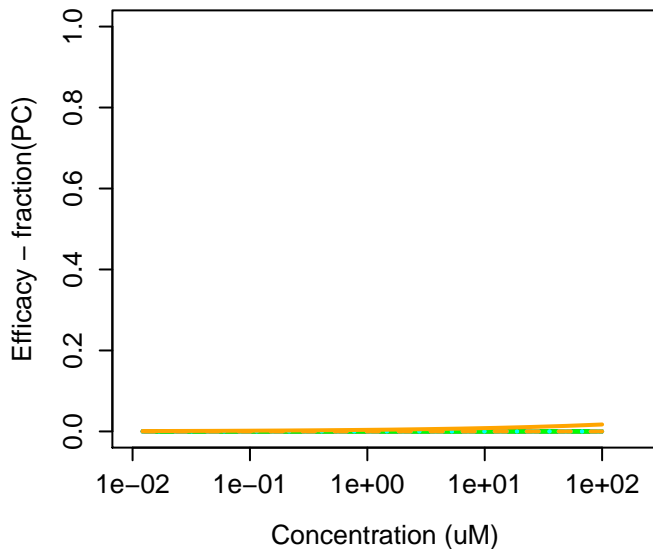

1112-39-6 : Dimethoxydimethylsilane  
Agonist: 0 Antagonist: 0

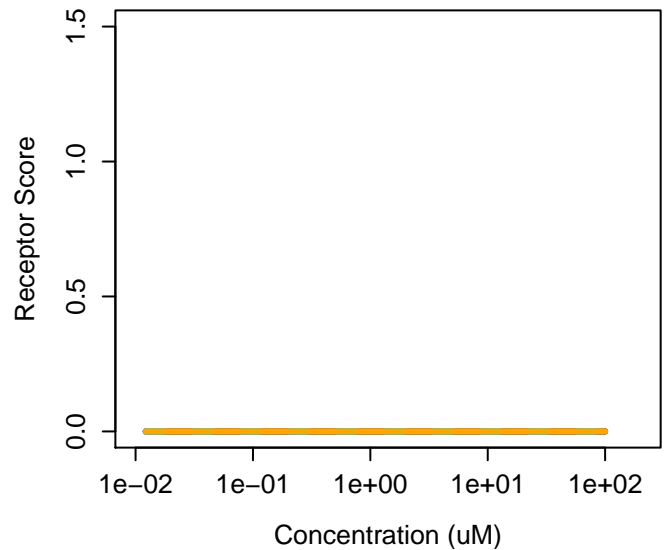



111-27-3 : 1-Hexanol



111-27-3 : 1-Hexanol  
Agonist: 0 Antagonist: 0



111-30-8 : Glutaraldehyde

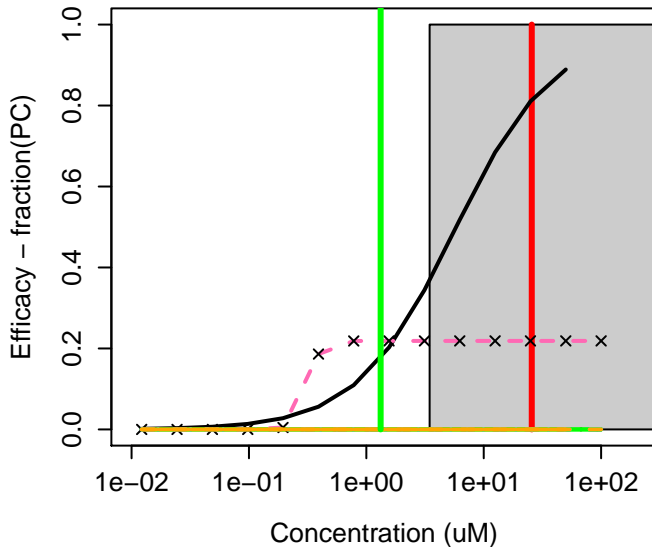

111-30-8 : Glutaraldehyde  
Agonist: 0.053 Antagonist: 0

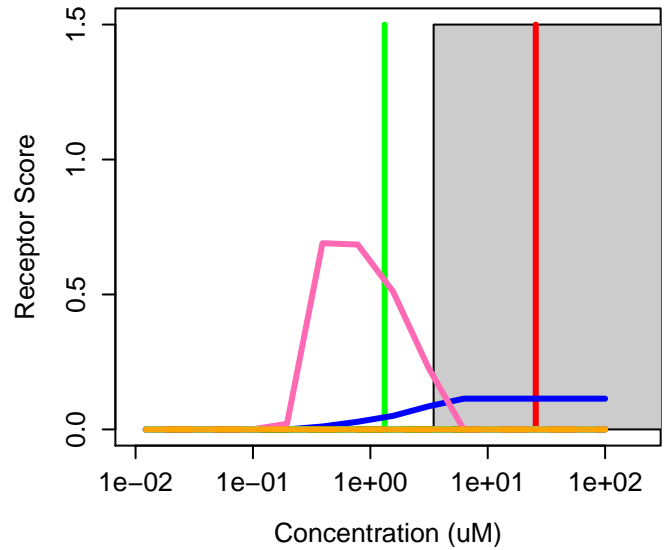

111-40-0 : Diethylenetriamine



111-40-0 : Diethylenetriamine  
Agonist: 0 Antagonist: 0



**111-42-2 : Diethanolamine**



**111-42-2 : Diethanolamine  
Agonist: 0 Antagonist: 0**



**111-44-4 : Bis(2-chloroethyl) ether**



**111-44-4 : Bis(2-chloroethyl) ether  
Agonist: 0 Antagonist: 0**



**111-46-6 : Diethylene glycol**



**111-46-6 : Diethylene glycol  
Agonist: 0 Antagonist: 0**



**1114-71-2 : Pebulate**



**1114-71-2 : Pebulate  
Agonist: 0 Antagonist: 0**



**111-49-9 : Hexamethyleneimine**



**111-49-9 : Hexamethyleneimine  
Agonist: 0 Antagonist: 0**



**111-55-7 : 1,2-Ethanediol diacetate**



**111-55-7 : 1,2-Ethanediol diacetate  
Agonist: 0 Antagonist: 0**



**111-62-6 : Ethyl oleate**



**111-62-6 : Ethyl oleate  
Agonist: 0 Antagonist: 0**



**111-69-3 : Hexanedinitrile**

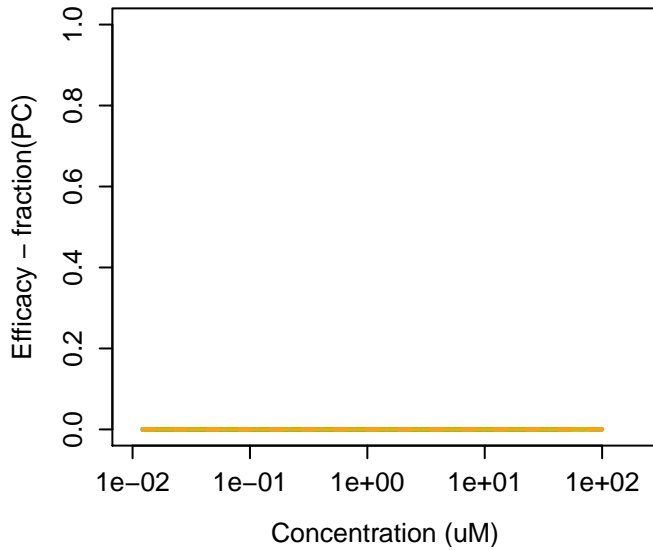

**111-69-3 : Hexanedinitrile  
Agonist: 0 Antagonist: 0**



**111-70-6 : 1-Heptanol**



**111-70-6 : 1-Heptanol  
Agonist: 0 Antagonist: 0**

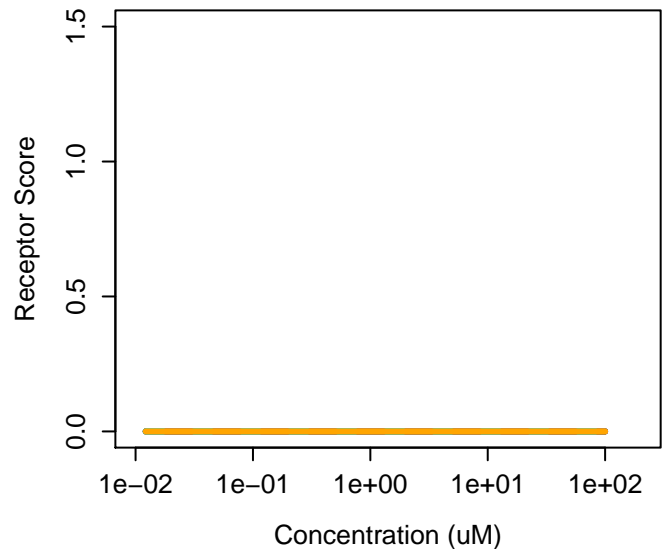

111-71-7 : Heptanal

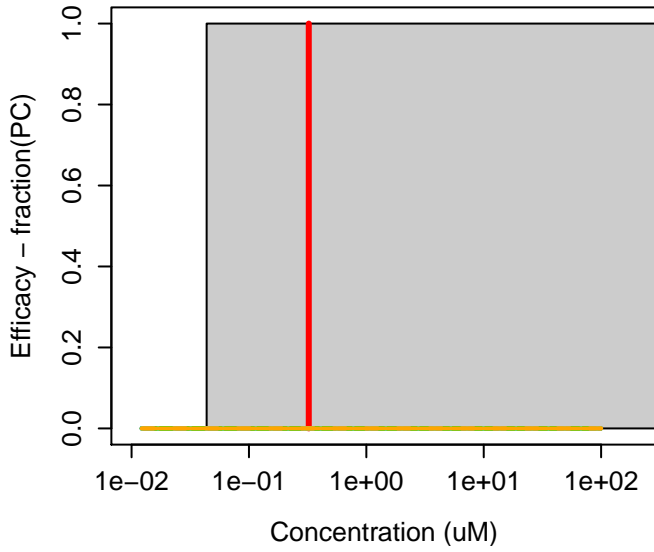

111-71-7 : Heptanal  
Agonist: 0 Antagonist: 0

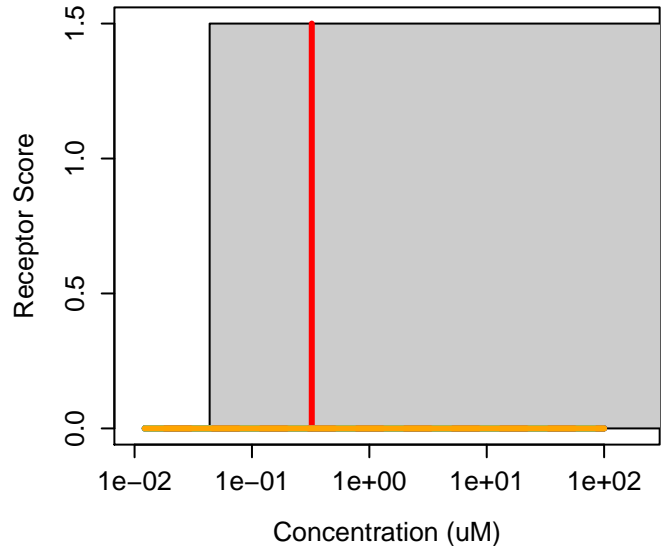

111-76-2 : 2-Butoxyethanol



111-76-2 : 2-Butoxyethanol  
Agonist: 0 Antagonist: 0



111-77-3 : Diethylene glycol monomethyl ether



111-77-3 : Diethylene glycol monomethyl ether  
Agonist: 0 Antagonist: 0



111812-58-9 : Fenpyroximate (Z,E)

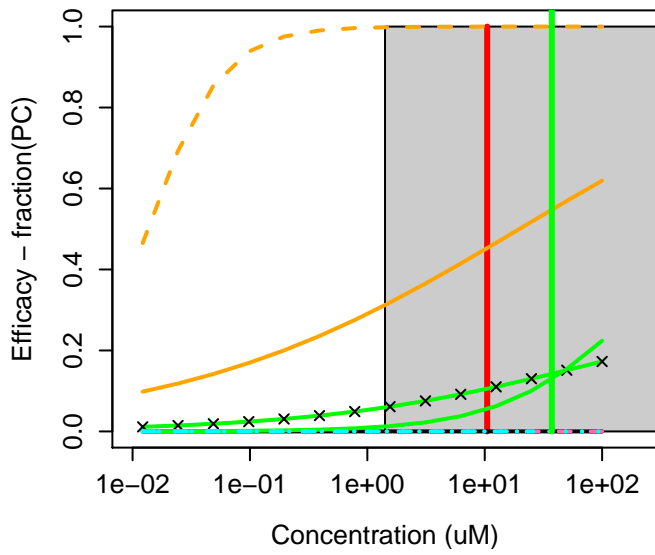

111812-58-9 : Fenpyroximate (Z,E)  
Agonist: 0 Antagonist: 0.096

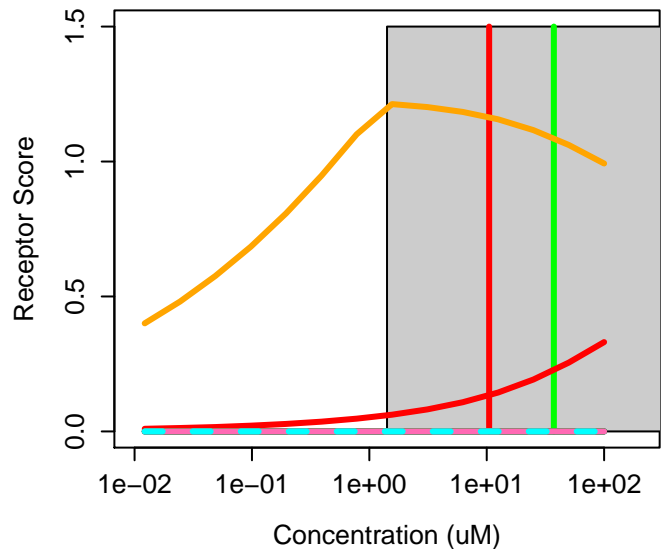

111-82-0 : Methyl dodecanoate

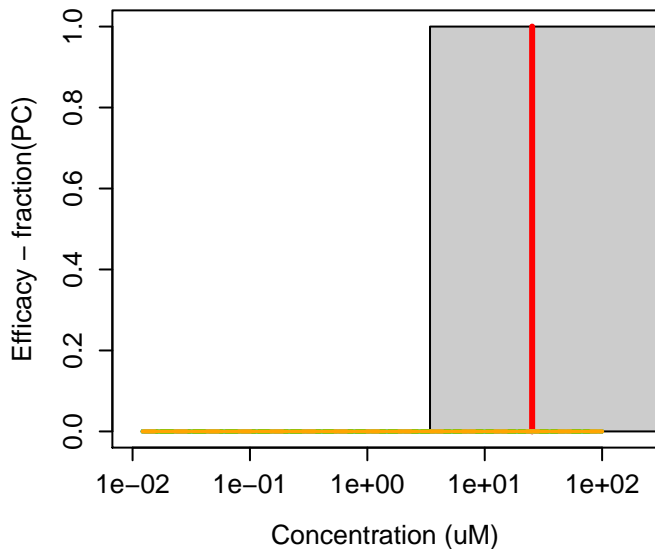

111-82-0 : Methyl dodecanoate  
Agonist: 0 Antagonist: 0

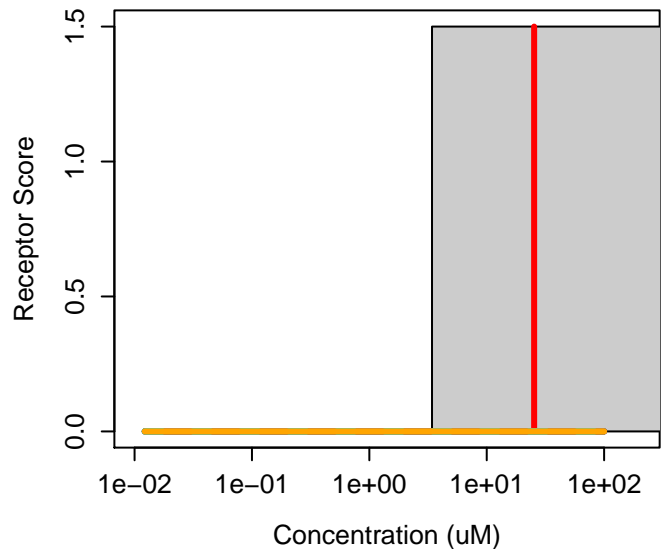

111-84-2 : Nonane



111-84-2 : Nonane  
Agonist: 0 Antagonist: 0

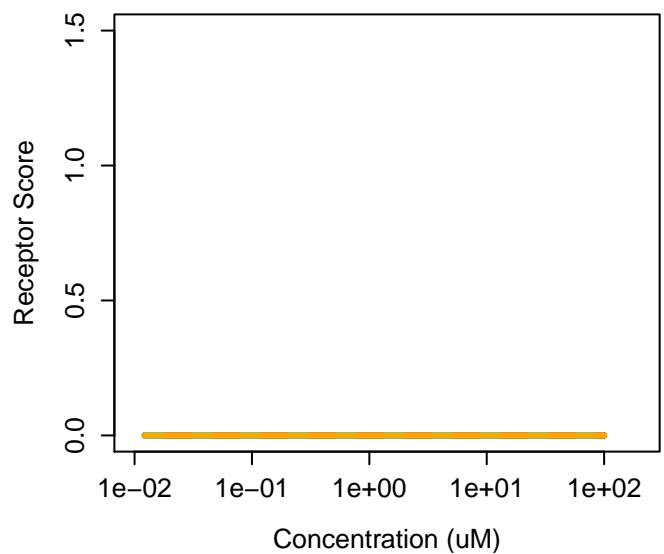

1118-46-3 : Butyltin trichloride

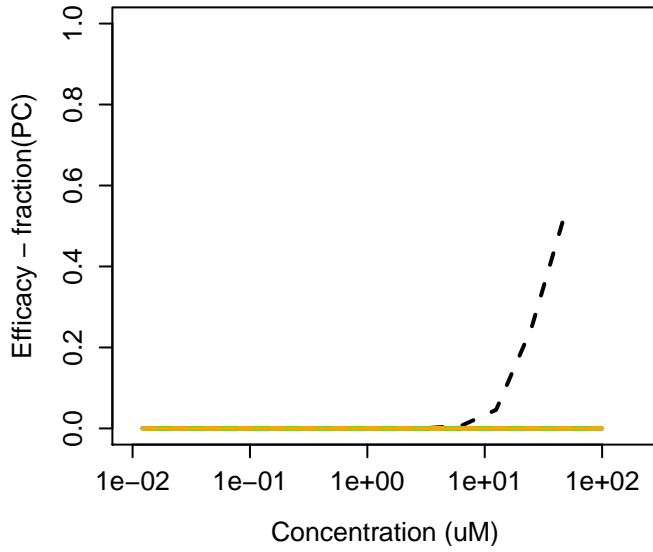

1118-46-3 : Butyltin trichloride  
Agonist: 0 Antagonist: 0



111-87-5 : 1-Octanol



111-87-5 : 1-Octanol  
Agonist: 0 Antagonist: 0



1118-92-9 : N,N-Dimethyloctanamide



1118-92-9 : N,N-Dimethyloctanamide  
Agonist: 0 Antagonist: 0



**111-90-0 : 2-(2-Ethoxyethoxy)ethanol**



**111-90-0 : 2-(2-Ethoxyethoxy)ethanol  
Agonist: 0 Antagonist: 0**



**1119-40-0 : Dimethyl glutarate**



**1119-40-0 : Dimethyl glutarate  
Agonist: 0 Antagonist: 0**

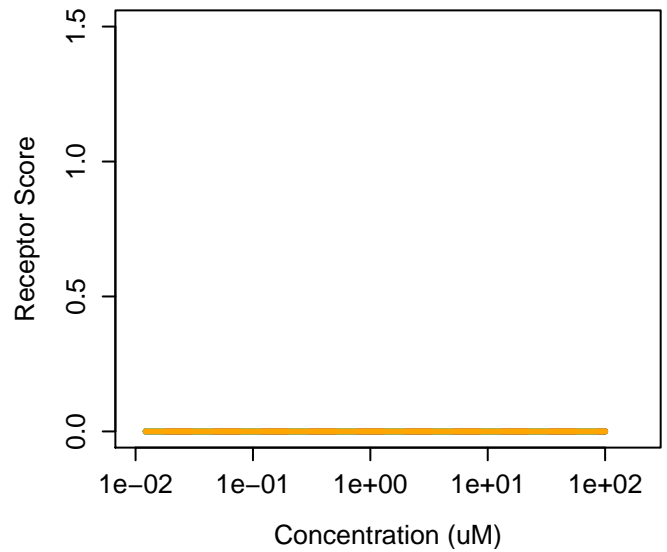

**111-96-6 : Bis(2-methoxyethyl) ether**



**111-96-6 : Bis(2-methoxyethyl) ether  
Agonist: 0 Antagonist: 0**





111988-49-9 : Thiacloprid



111988-49-9 : Thiacloprid  
Agonist: 0 Antagonist: 0



111991-09-4 : Nicosulfuron



111991-09-4 : Nicosulfuron  
Agonist: 0 Antagonist: 0



1120-01-0 : Sodium hexyldecyl sulfate

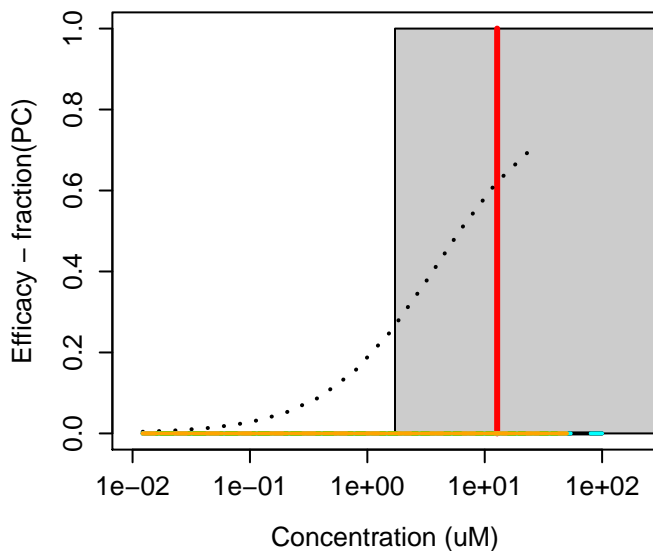

1120-01-0 : Sodium hexyldecyl sulfate  
Agonist: 0 Antagonist: 0

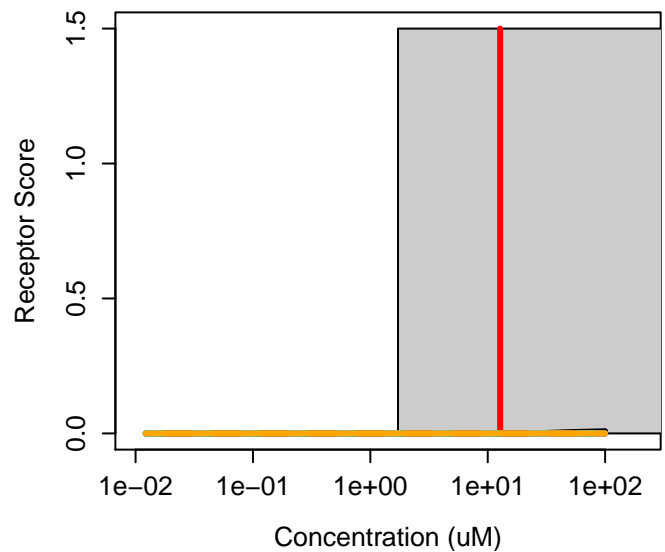

1120-04-3 : Octadecyl sulfate sodium salt

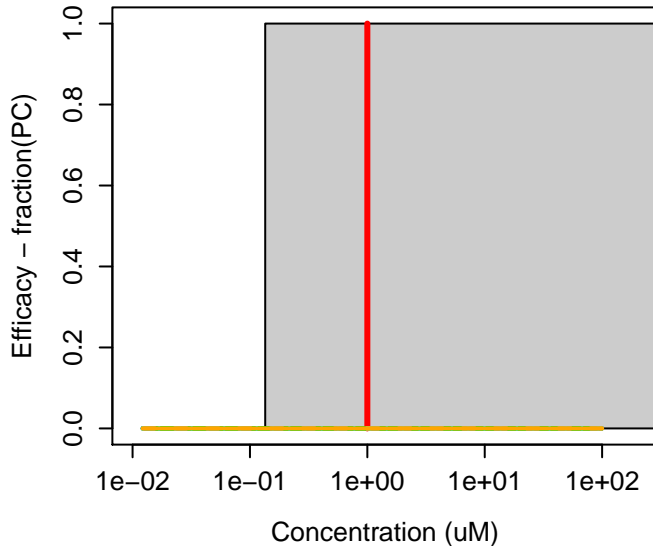

1120-04-3 : Octadecyl sulfate sodium salt  
Agonist: 0 Antagonist: 0

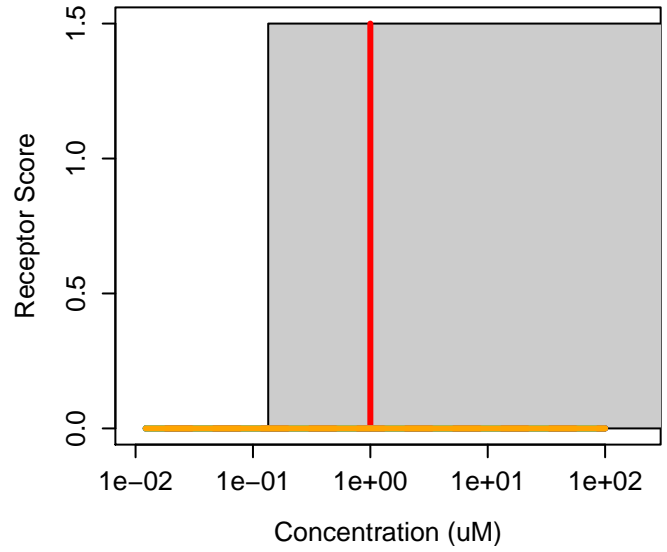

112-00-5 : Dodecyltrimethylammonium chloride

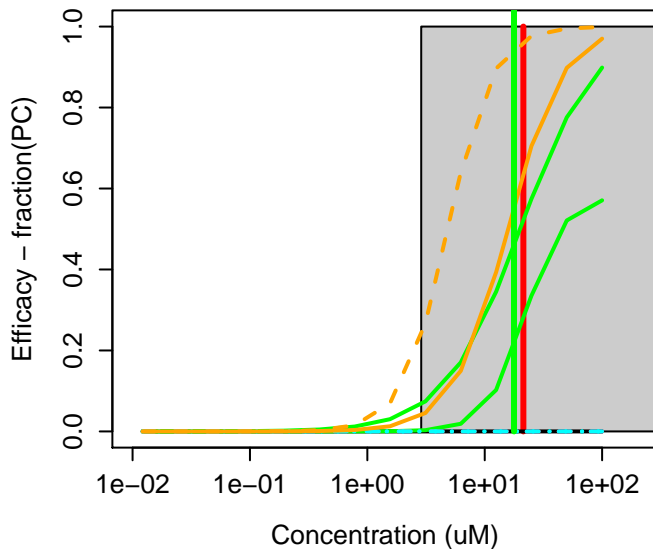

112-00-5 : Dodecyltrimethylammonium chloride  
Agonist: 0 Antagonist: 0.26

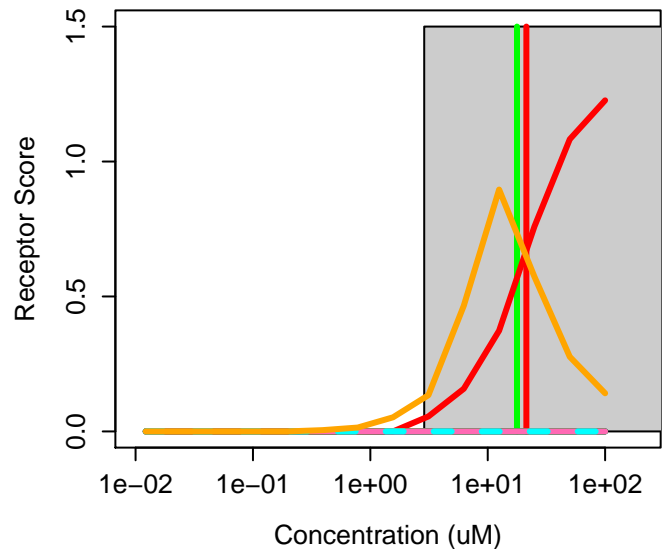

1120-21-4 : Undecane



1120-21-4 : Undecane  
Agonist: 0 Antagonist: 0



**1120-36-1 : 1-Tetradecene**

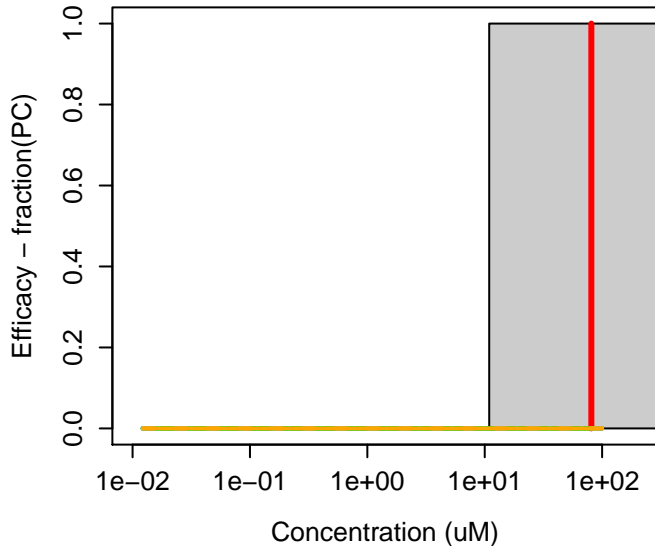

**1120-36-1 : 1-Tetradecene  
Agonist: 0 Antagonist: 0**

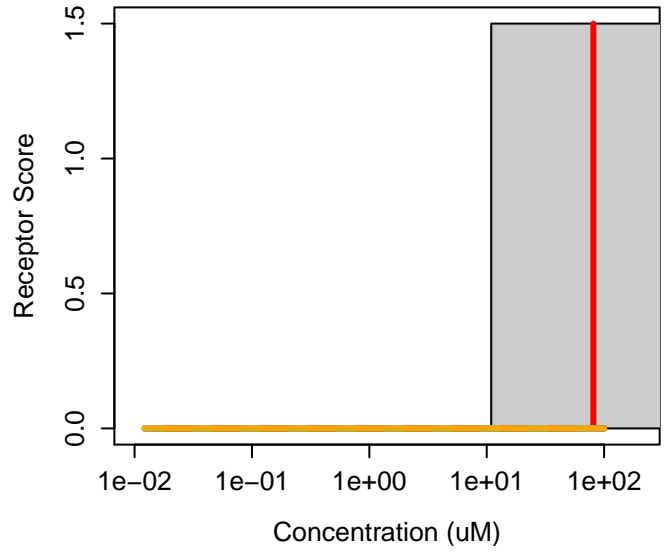

**112-05-0 : Nonanoic acid**

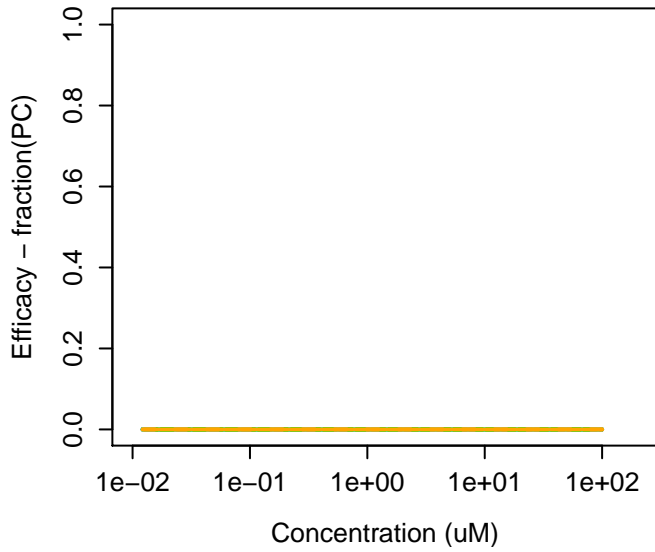

**112-05-0 : Nonanoic acid  
Agonist: 0 Antagonist: 0**



**1120-71-4 : 1,3-Propane sultone**

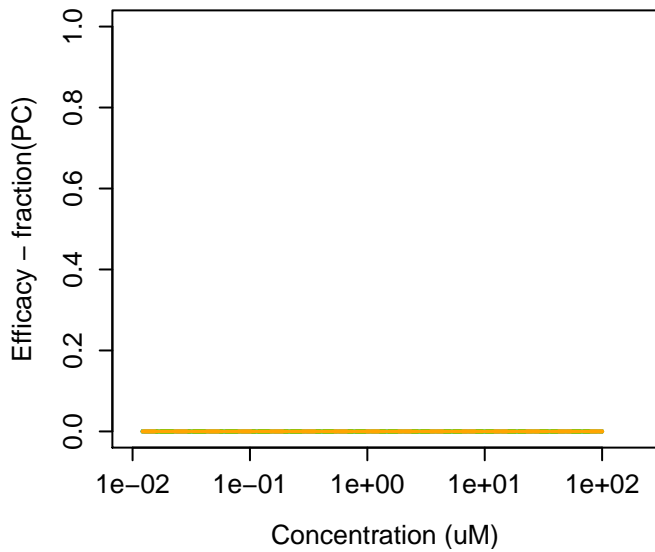

**1120-71-4 : 1,3-Propane sultone  
Agonist: 0 Antagonist: 0**



**112-07-2 : 2-Butoxyethyl acetate**



**112-07-2 : 2-Butoxyethyl acetate  
Agonist: 0 Antagonist: 0**



**112-12-9 : 2-Undecanone**



**112-12-9 : 2-Undecanone  
Agonist: 0 Antagonist: 0**



**112-14-1 : Octyl acetate**



**112-14-1 : Octyl acetate  
Agonist: 0 Antagonist: 0**



112-18-5 : N,N-Dimethyldodecan-1-amine

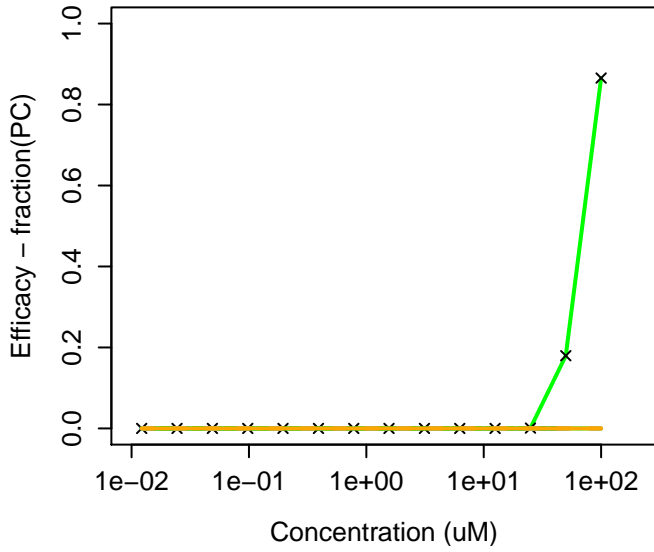

112-18-5 : N,N-Dimethyldodecan-1-amine  
Agonist: 0 Antagonist: 0



112226-61-6 : Halofenozide



112226-61-6 : Halofenozide  
Agonist: 0 Antagonist: 0



112-25-4 : 2-(Hexyloxy)ethanol



112-25-4 : 2-(Hexyloxy)ethanol  
Agonist: 0 Antagonist: 0



112-27-6 : Triethylene glycol



112-27-6 : Triethylene glycol  
Agonist: 0 Antagonist: 0



112281-77-3 : Tetraconazole

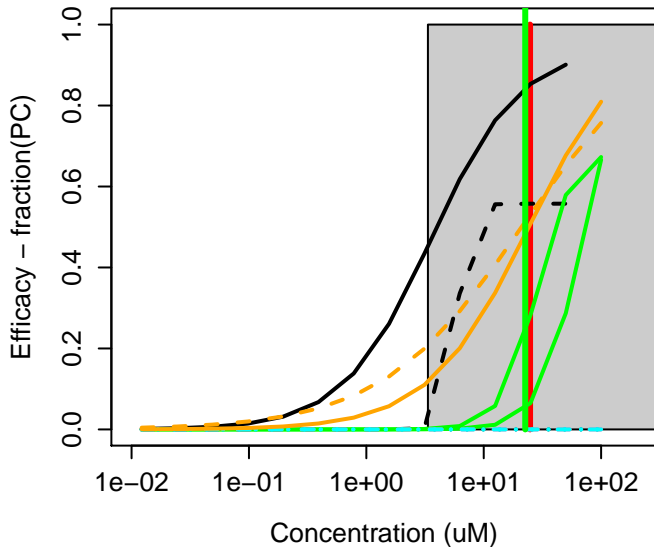

112281-77-3 : Tetraconazole  
Agonist: 0 Antagonist: 0.41

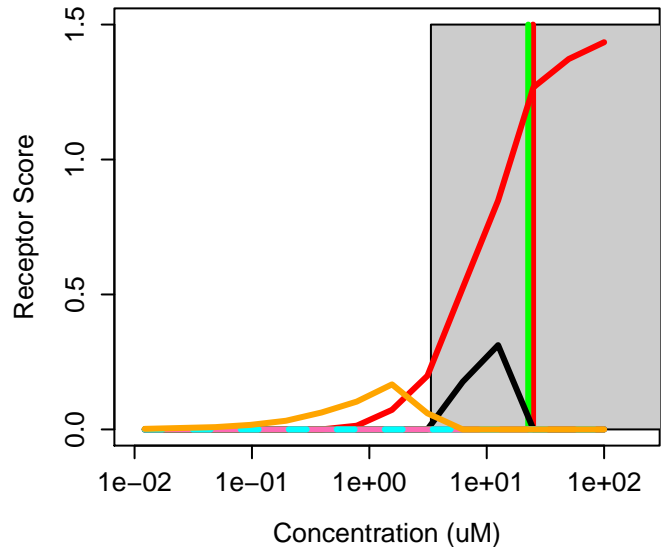

112-30-1 : 1-Decanol



112-30-1 : 1-Decanol  
Agonist: 0 Antagonist: 0



112-31-2 : Decanal

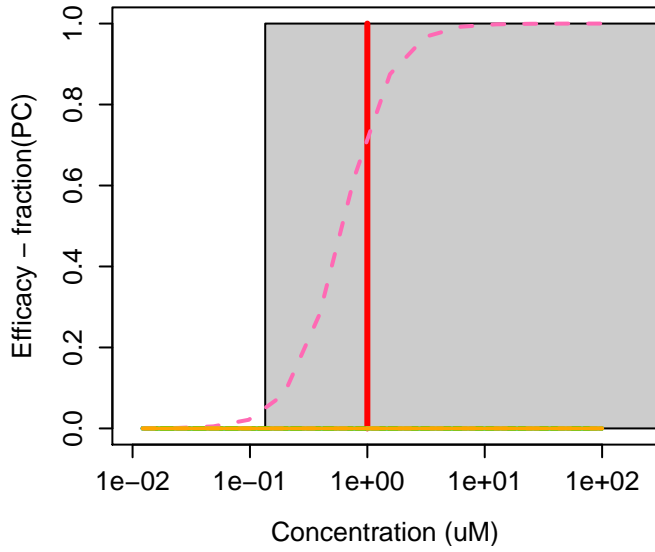

112-31-2 : Decanal  
Agonist: 2.3e-05 Antagonist: 0

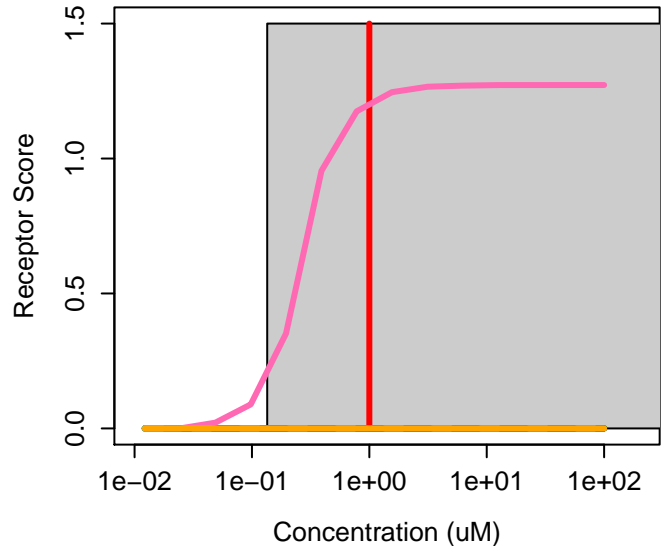

112-34-5 : 2-(2-Butoxyethoxy)ethanol

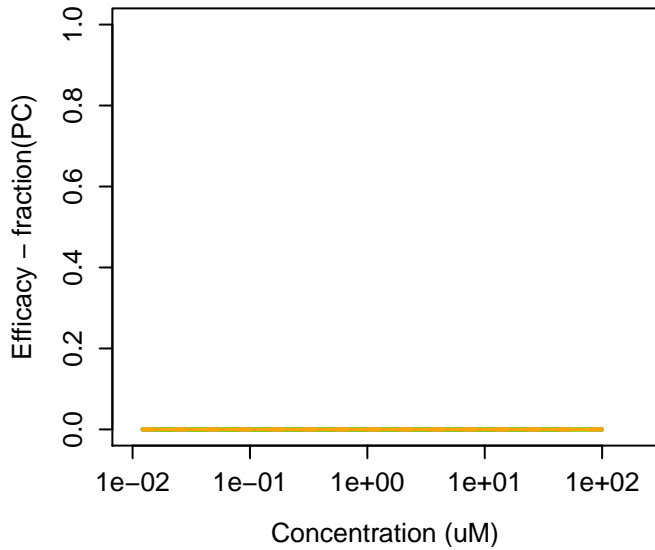

112-34-5 : 2-(2-Butoxyethoxy)ethanol  
Agonist: 0 Antagonist: 0



112-35-6 : 2-[2-(2-Methoxyethoxy)ethoxy]ethanol



112-35-6 : 2-[2-(2-Methoxyethoxy)ethoxy]ethanol  
Agonist: 0 Antagonist: 0



112-38-9 : 10-Undecenoic acid

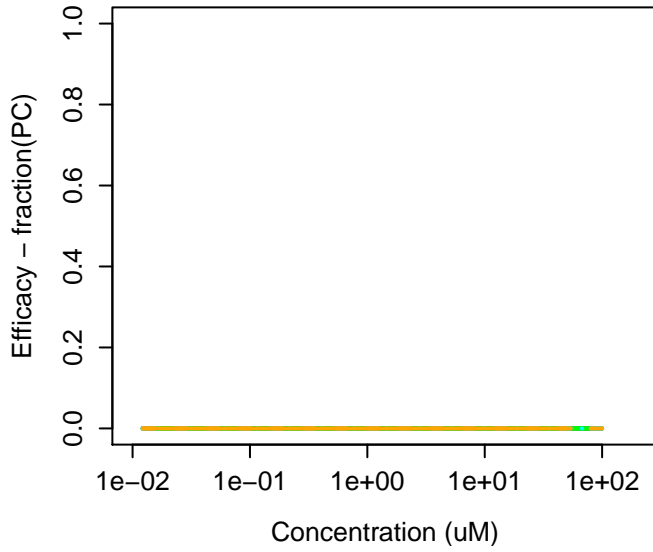

112-38-9 : 10-Undecenoic acid  
Agonist: 0 Antagonist: 0



112410-23-8 : Tebufenozide

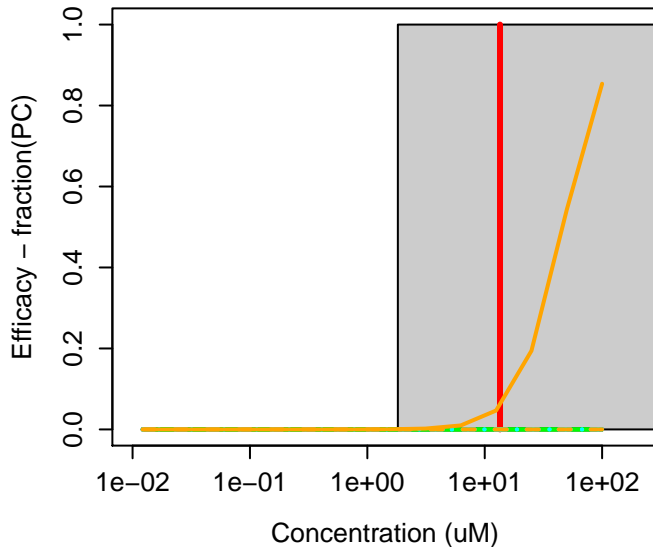

112410-23-8 : Tebufenozide  
Agonist: 0 Antagonist: 0

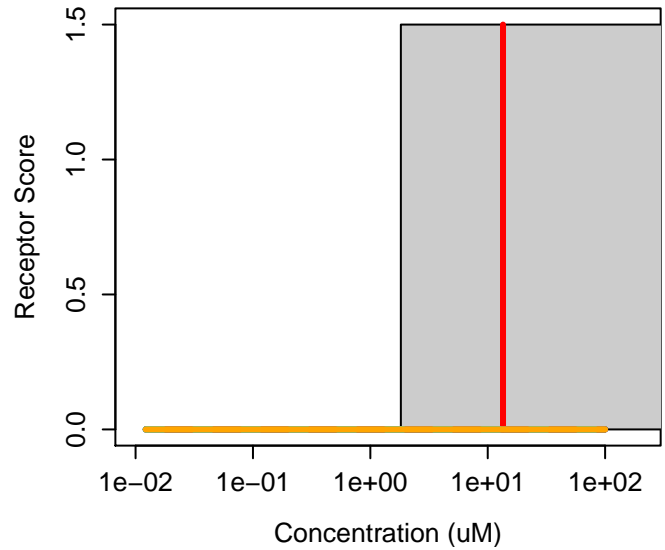

112-42-5 : 1-Undecanol

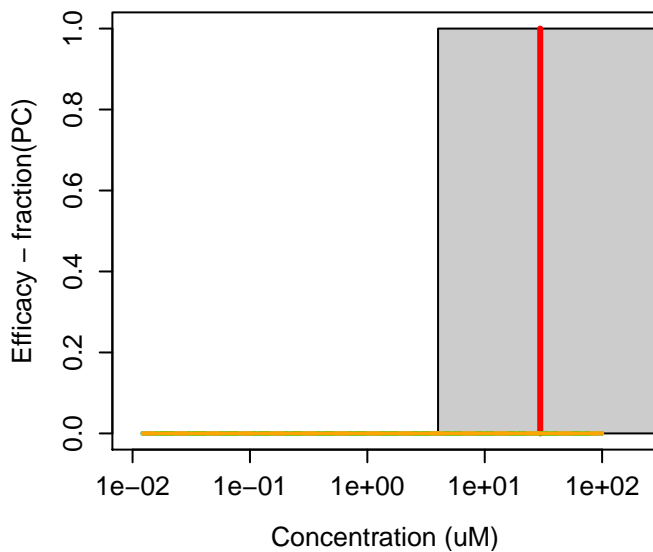

112-42-5 : 1-Undecanol  
Agonist: 0 Antagonist: 0

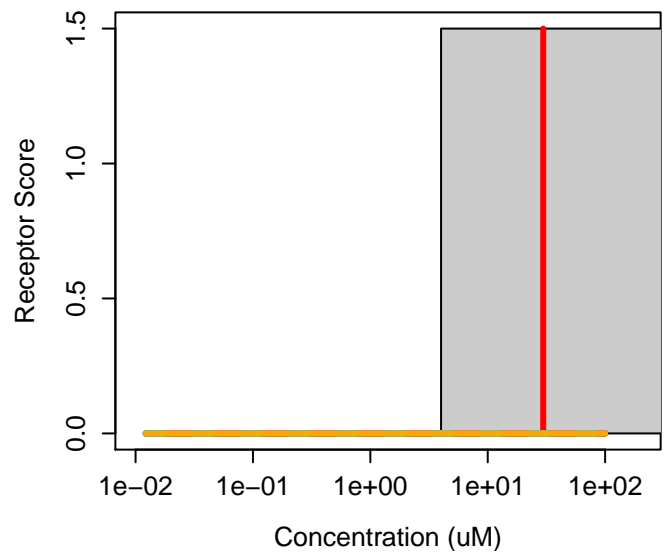



112-49-2 : Triethylene glycol dimethyl ether



112-49-2 : Triethylene glycol dimethyl ether  
Agonist: 0 Antagonist: 0



112-50-5 : 2-[2-(2-Ethoxyethoxy)ethoxy]ethano

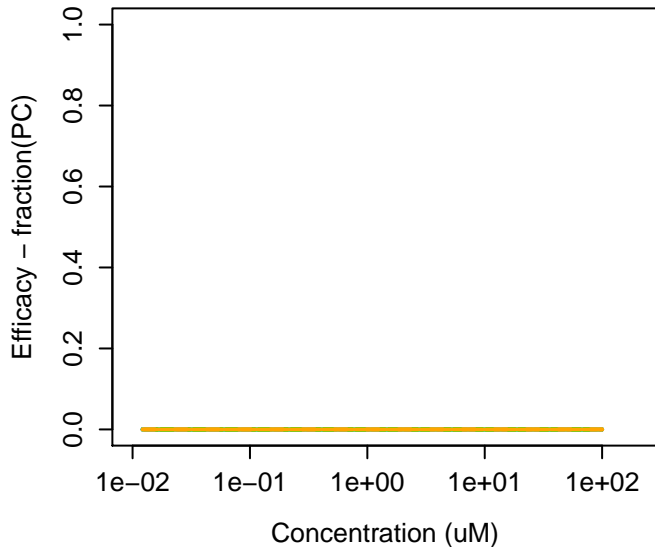

112-50-5 : 2-[2-(2-Ethoxyethoxy)ethoxy]ethano  
Agonist: 0 Antagonist: 0



112529-15-4 : Pioglitazone hydrochloride

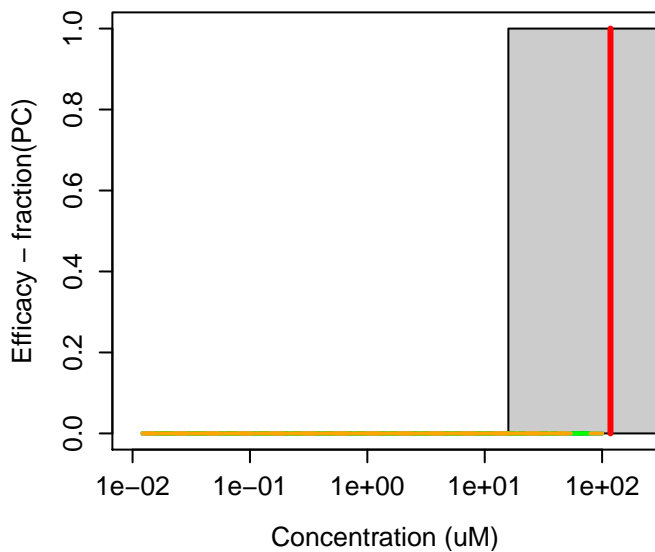

112529-15-4 : Pioglitazone hydrochloride  
Agonist: 0 Antagonist: 0

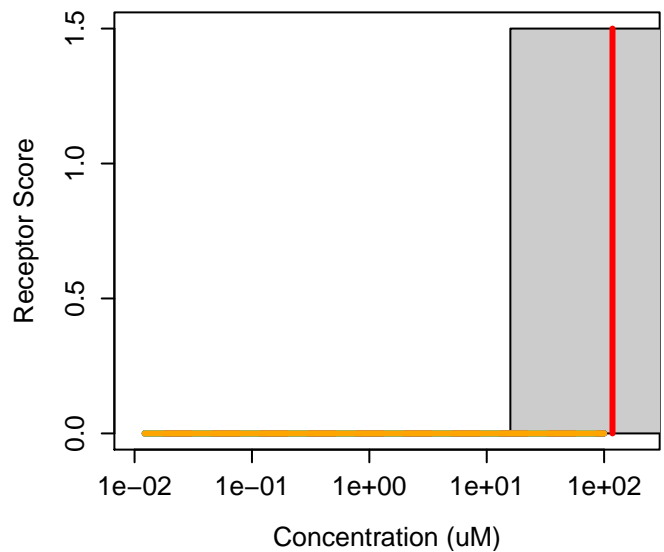

112-53-8 : 1-Dodecanol

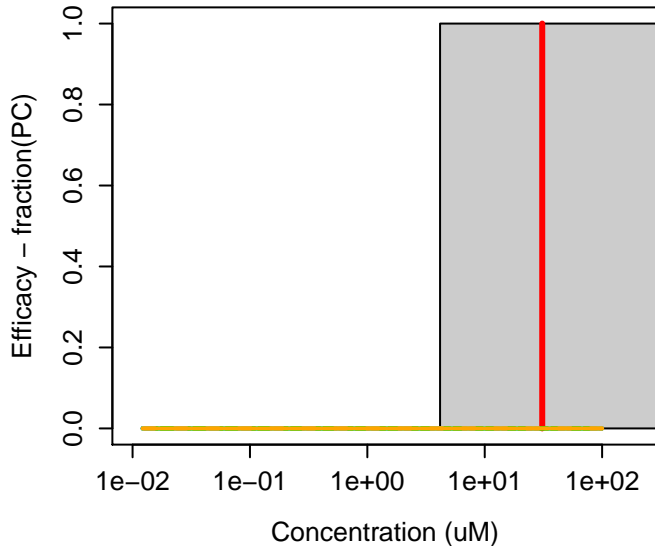

112-53-8 : 1-Dodecanol  
Agonist: 0 Antagonist: 0

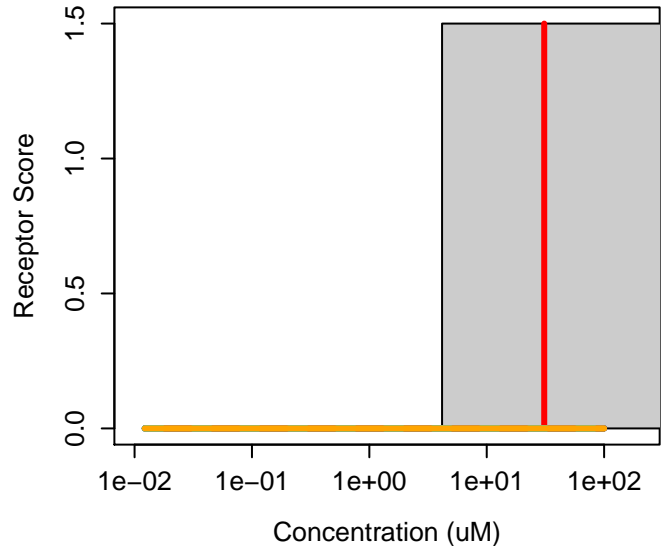

112-55-0 : 1-Dodecanethiol

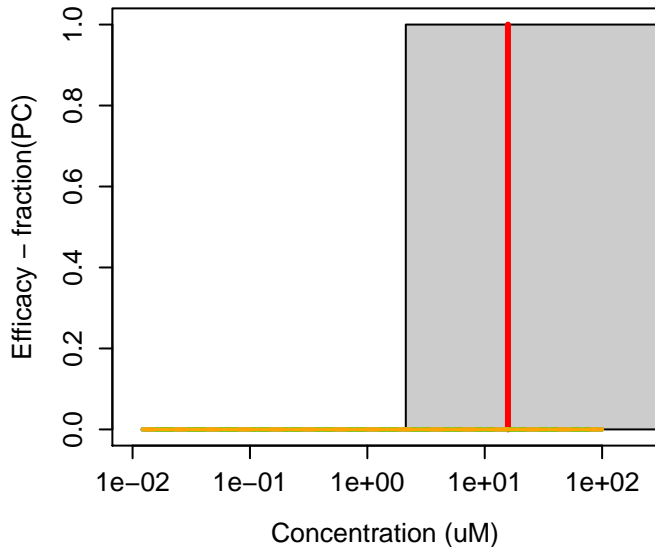

112-55-0 : 1-Dodecanethiol  
Agonist: 0 Antagonist: 0

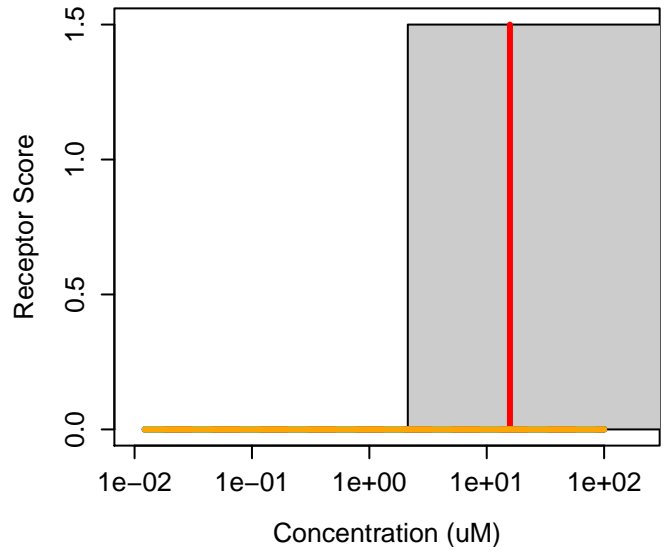

112-60-7 : Tetraethylene glycol

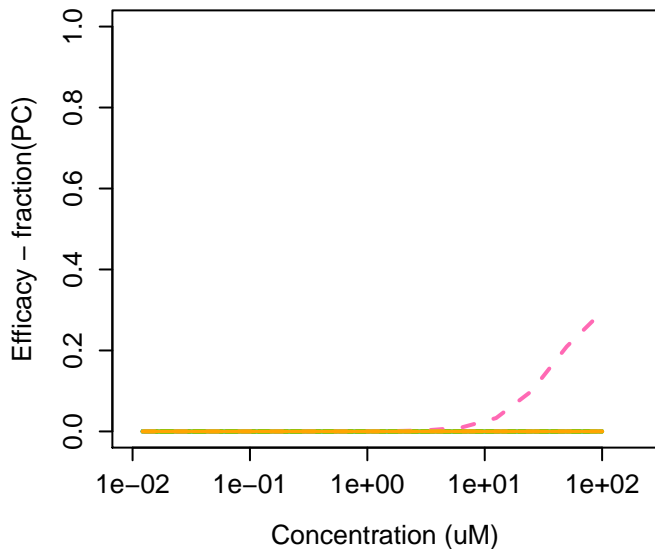

112-60-7 : Tetraethylene glycol  
Agonist: 0 Antagonist: 0

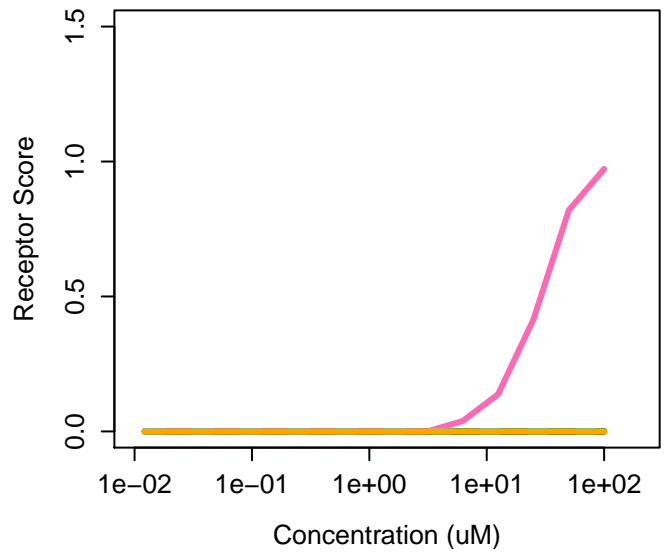

112-63-0 : Methyl linoleate

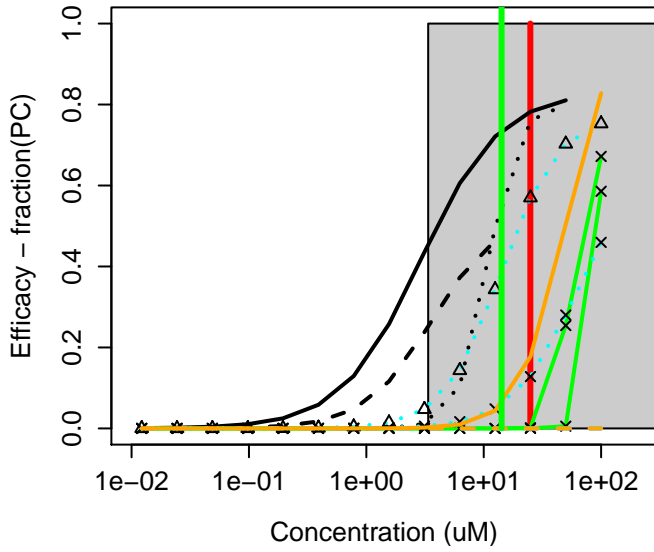

112-63-0 : Methyl linoleate  
Agonist: 0.17 Antagonist: 0.081

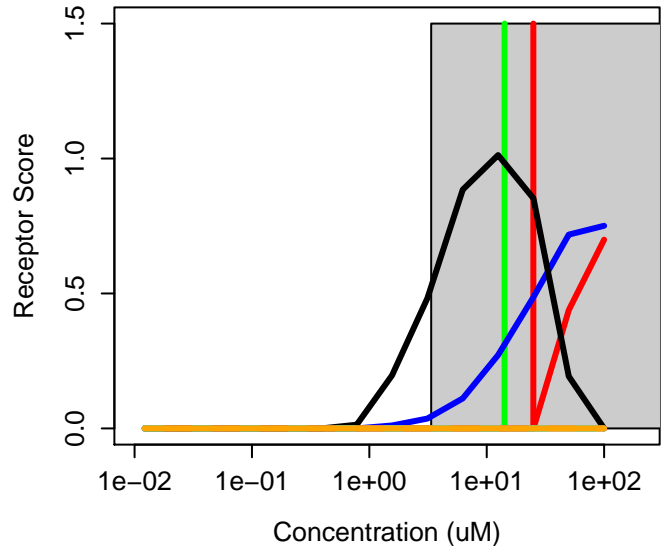

112-70-9 : 1-Tridecanol

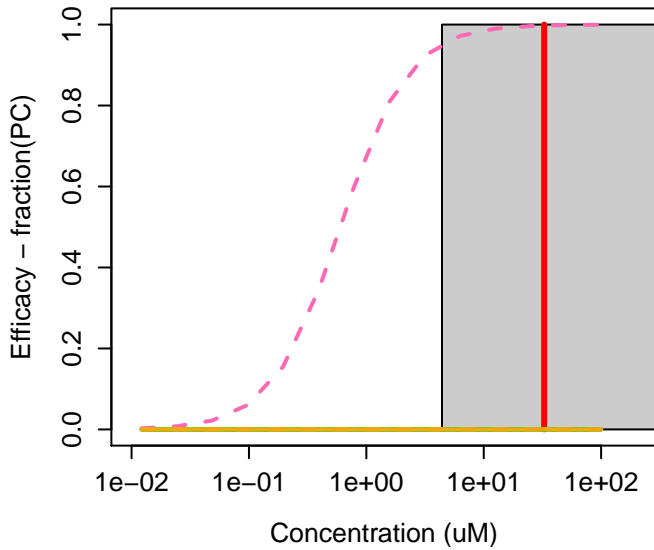

112-70-9 : 1-Tridecanol  
Agonist: 0.00015 Antagonist: 0

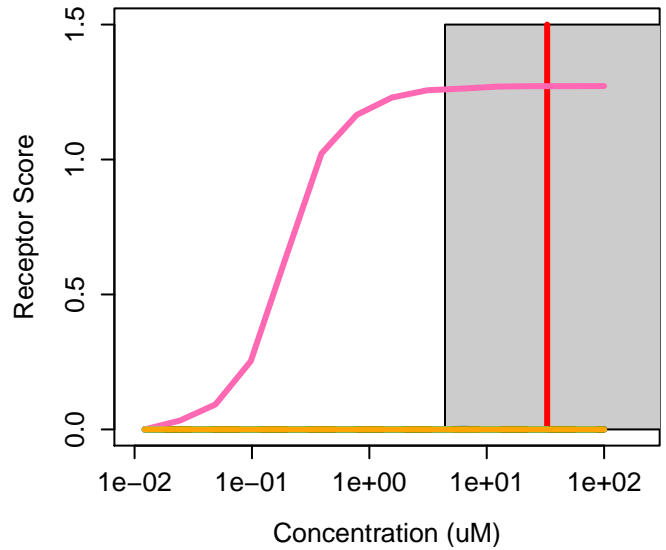

112-72-1 : 1-Tetradecanol

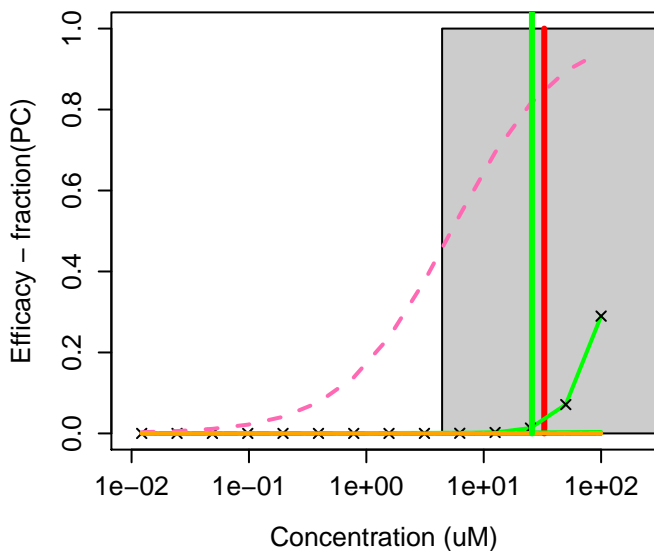

112-72-1 : 1-Tetradecanol  
Agonist: 0.014 Antagonist: 0

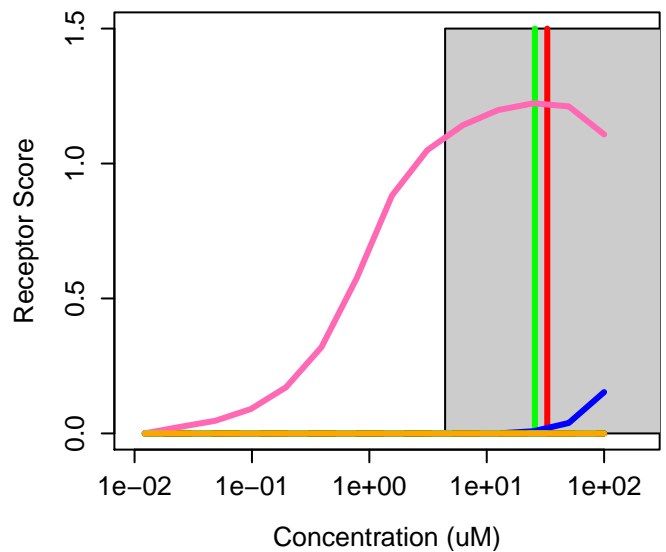

112733-06-9 : Zenarestat



112733-06-9 : Zenarestat  
Agonist: 0 Antagonist: 0



112-80-1 : Oleic acid

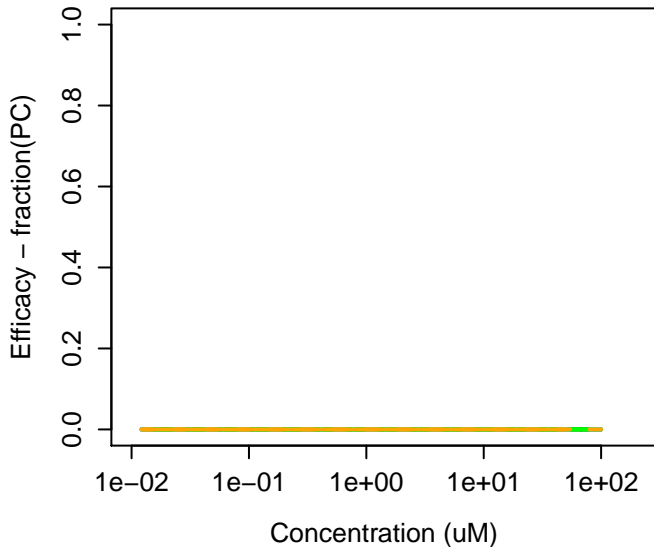

112-80-1 : Oleic acid  
Agonist: 0 Antagonist: 0



112809-51-5 : Letrozole

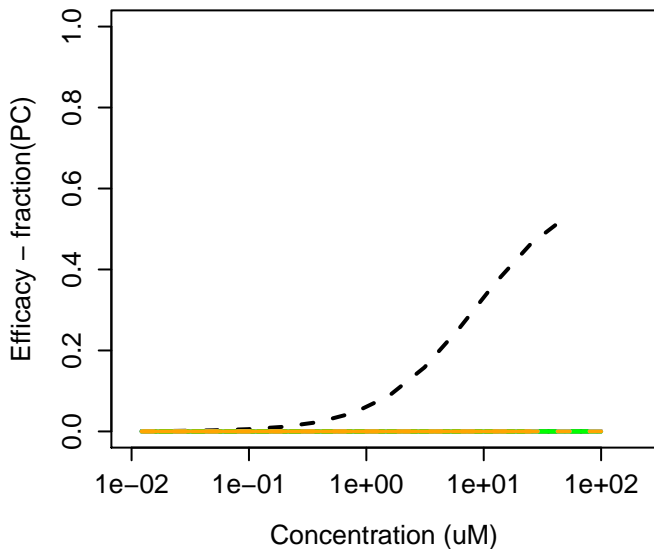

112809-51-5 : Letrozole  
Agonist: 0 Antagonist: 0

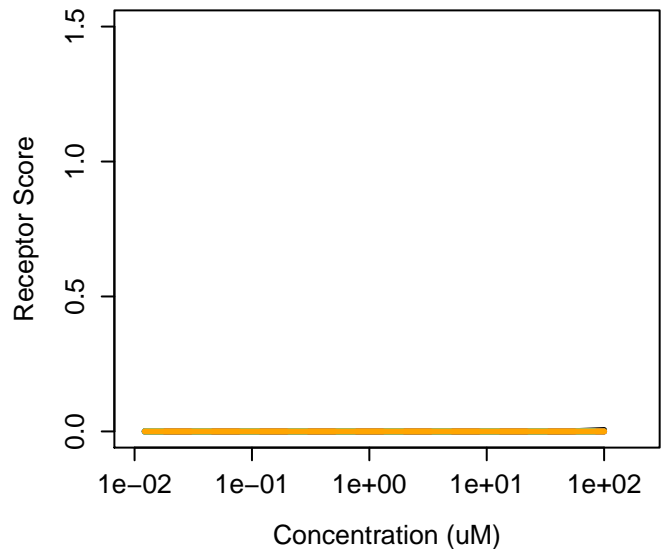

113136-77-9 : Cyclanilide

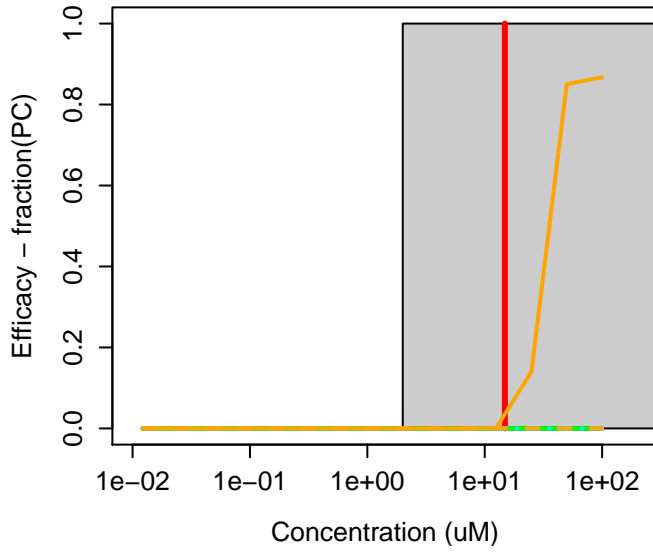

113136-77-9 : Cyclanilide  
Agonist: 0 Antagonist: 0

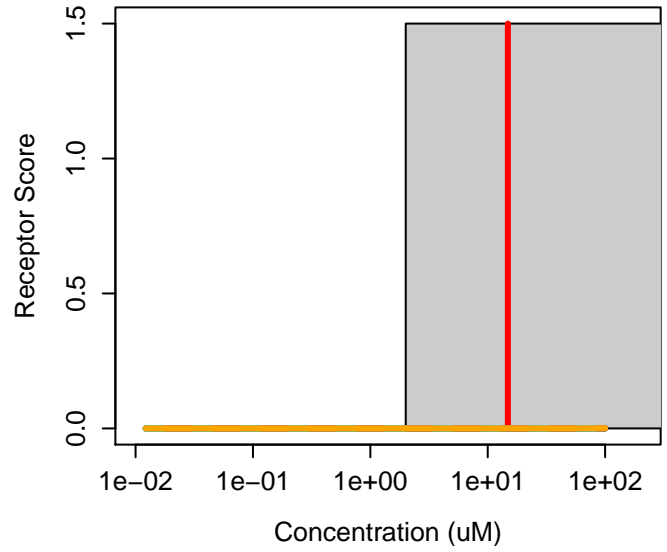

1134-23-2 : Cycloate



1134-23-2 : Cycloate  
Agonist: 0 Antagonist: 0



113-48-4 : MGK-264

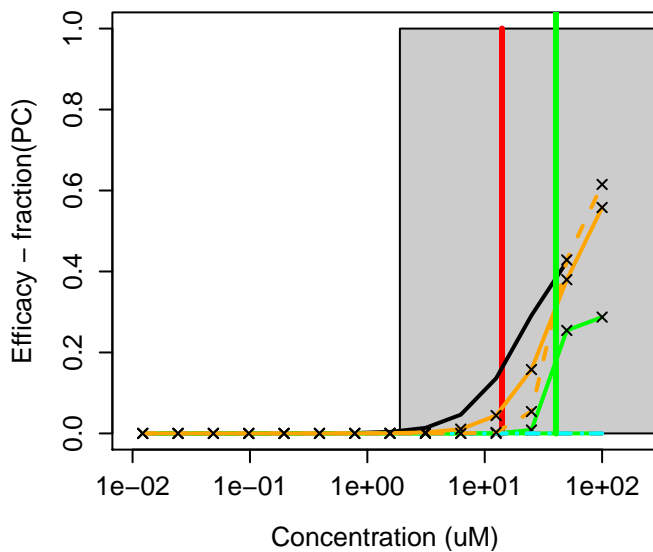

113-48-4 : MGK-264  
Agonist: 0 Antagonist: 0.094

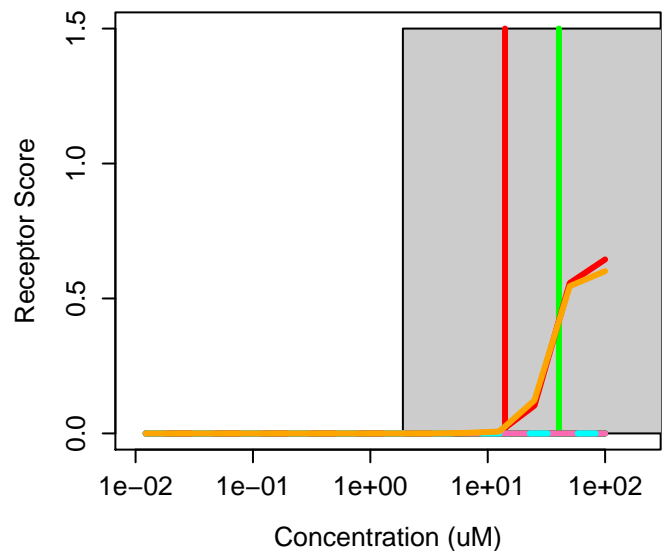

113734-18-2 : CP-114271



113734-18-2 : CP-114271  
Agonist: 0 Antagonist: 0



114-07-8 : Erythromycin

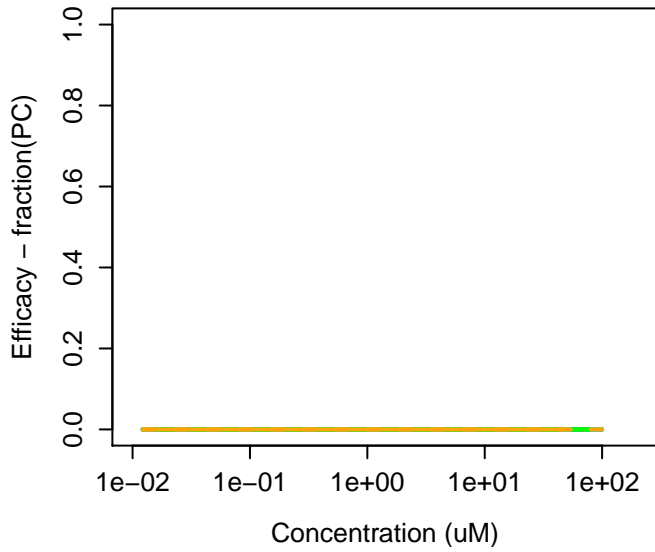

114-07-8 : Erythromycin  
Agonist: 0 Antagonist: 0



114-26-1 : Propoxur



114-26-1 : Propoxur  
Agonist: 0 Antagonist: 0



114311-32-9 : Imazamox

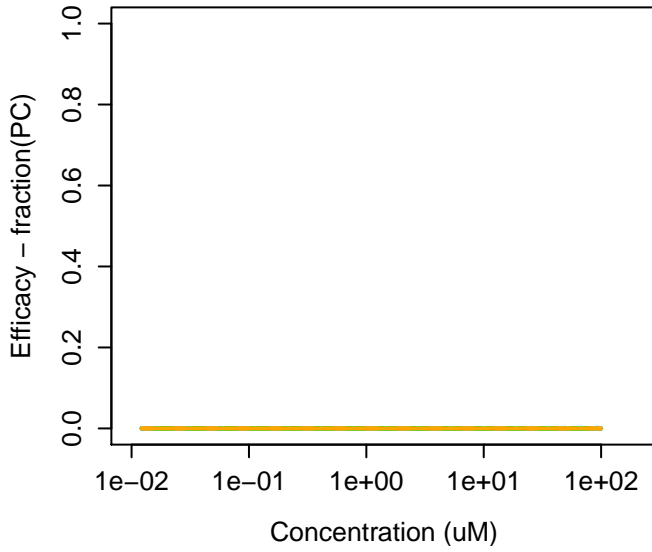

114311-32-9 : Imazamox  
Agonist: 0 Antagonist: 0

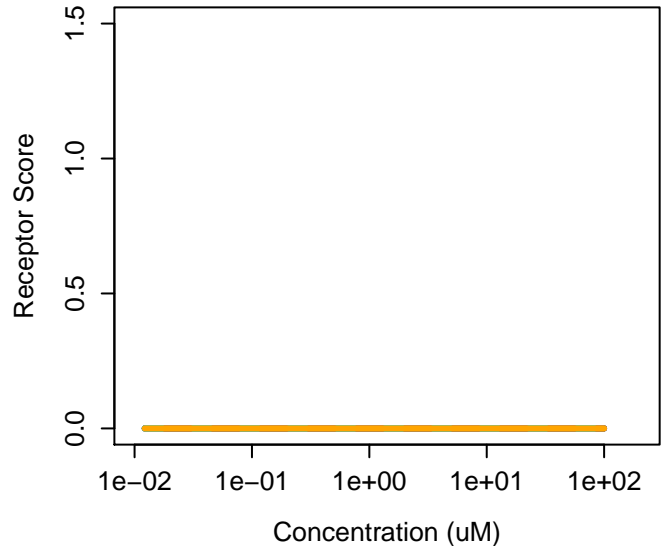

1143-38-0 : Anthralin

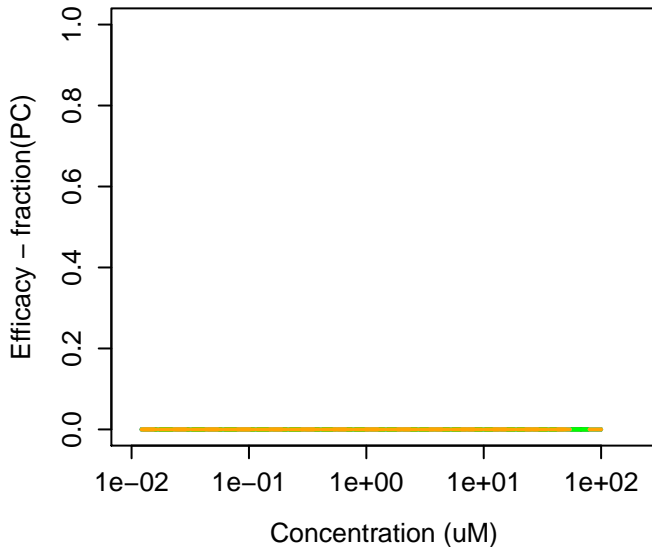

1143-38-0 : Anthralin  
Agonist: 0 Antagonist: 0



114369-43-6 : Fenbuconazole

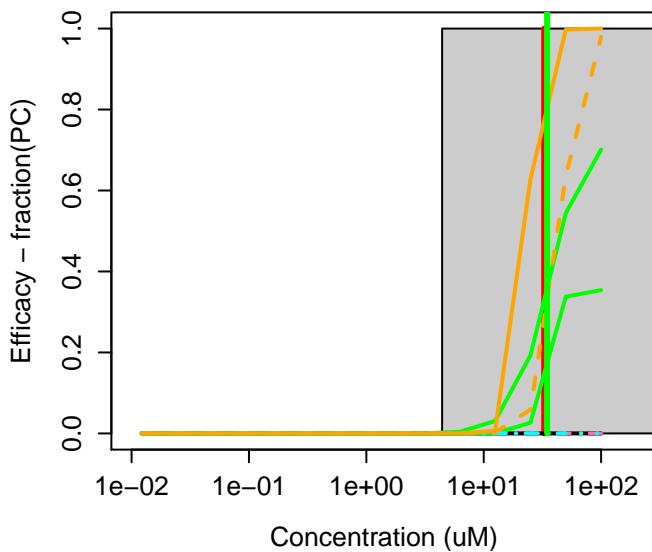

114369-43-6 : Fenbuconazole  
Agonist: 0 Antagonist: 0.13

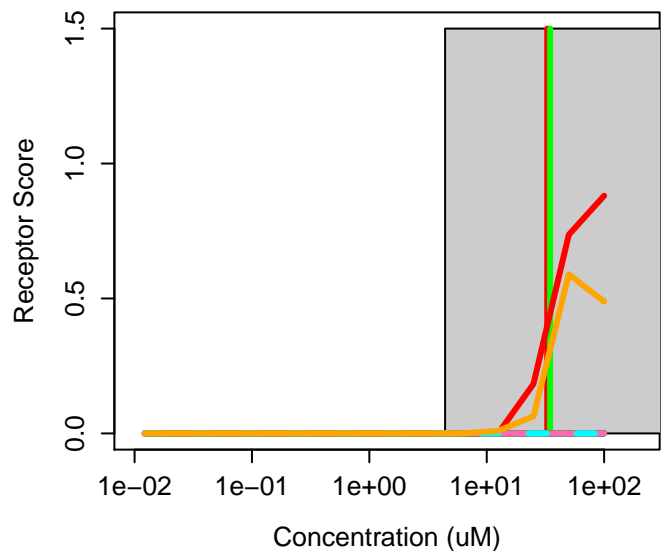

115-28-6 : Chlorendic acid



115-28-6 : Chlorendic acid  
Agonist: 0 Antagonist: 0



115-29-7 : Endosulfan

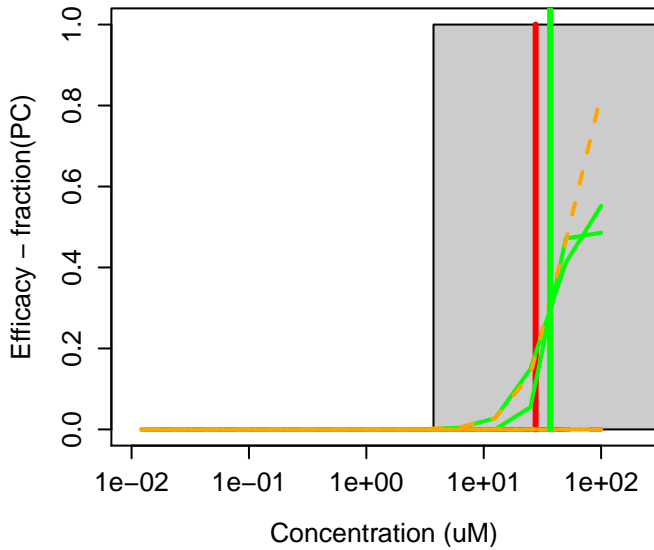

115-29-7 : Endosulfan  
Agonist: 0 Antagonist: 0.073

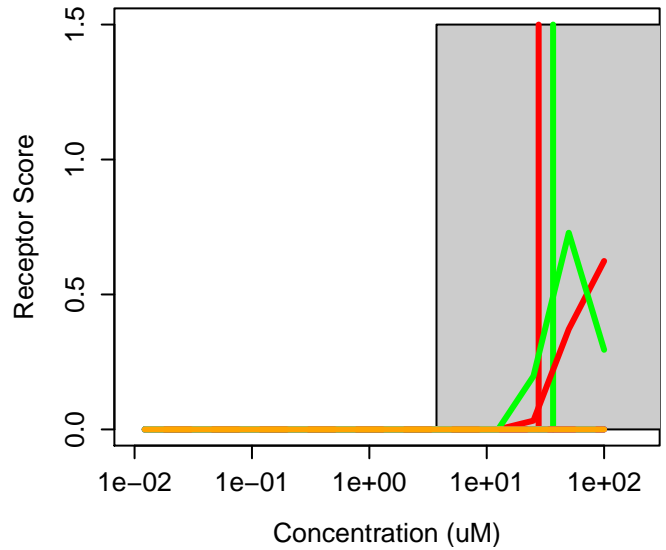

115-32-2 : Dicofol

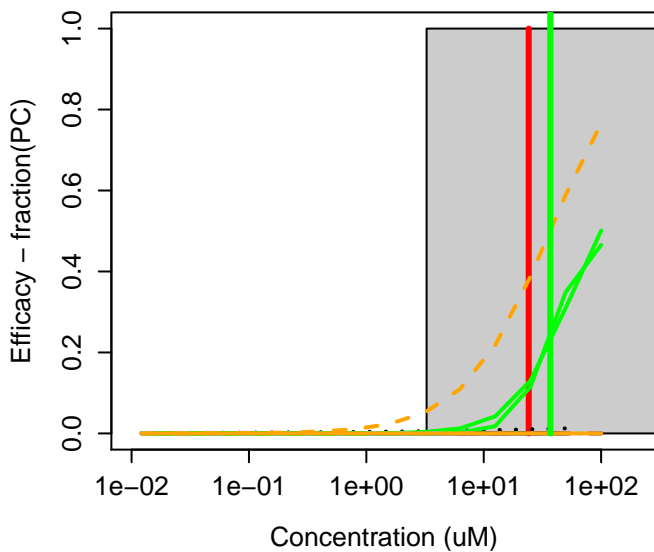

115-32-2 : Dicofol  
Agonist: 0 Antagonist: 0.083

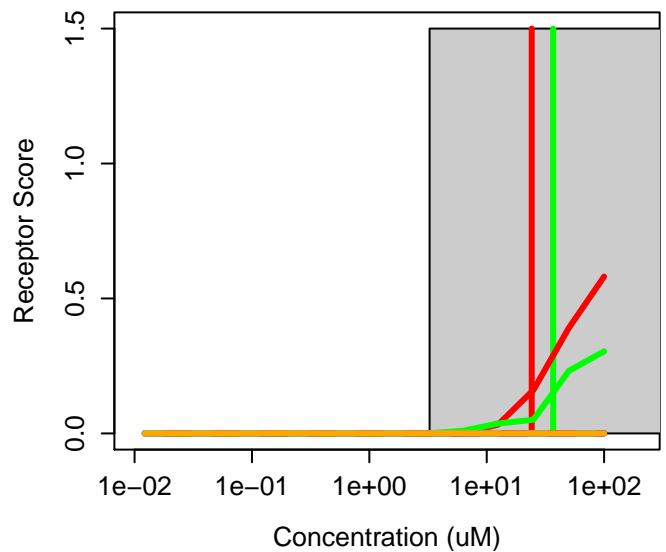



115-39-9 : Bromophenol blue

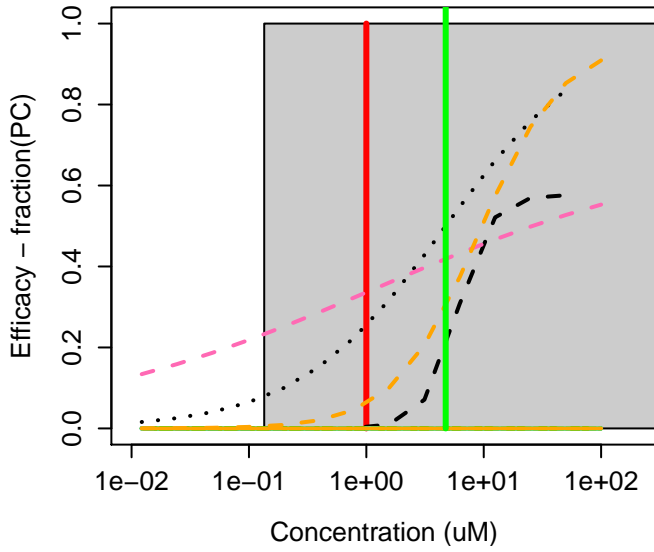

115-39-9 : Bromophenol blue  
Agonist: 0.046 Antagonist: 0.23

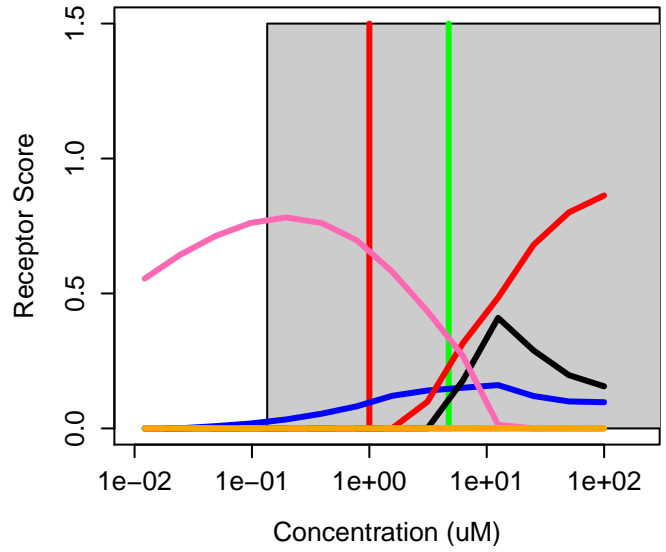

1156-19-0 : Tolazamide

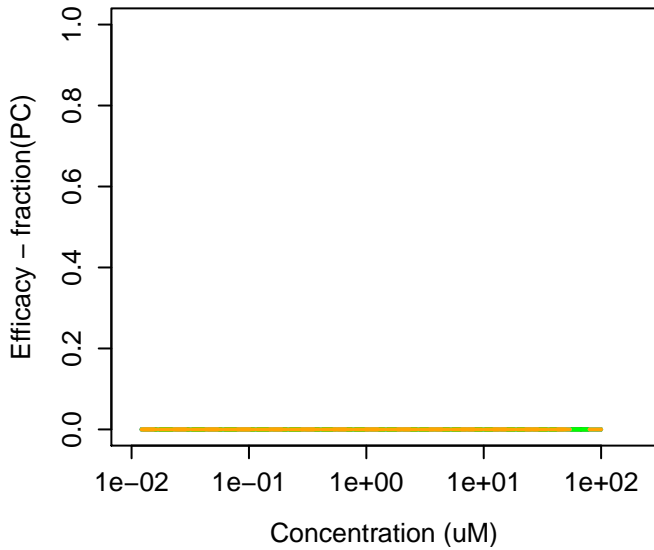

1156-19-0 : Tolazamide  
Agonist: 0 Antagonist: 0



115-77-5 : Pentaerythritol

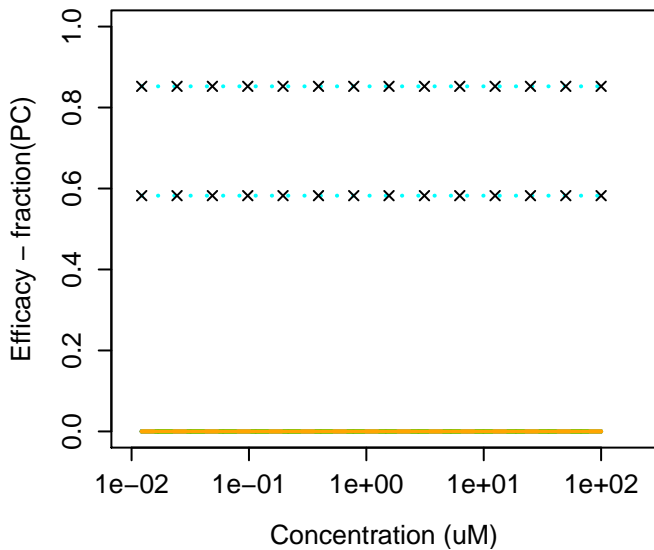

115-77-5 : Pentaerythritol  
Agonist: 0 Antagonist: 0

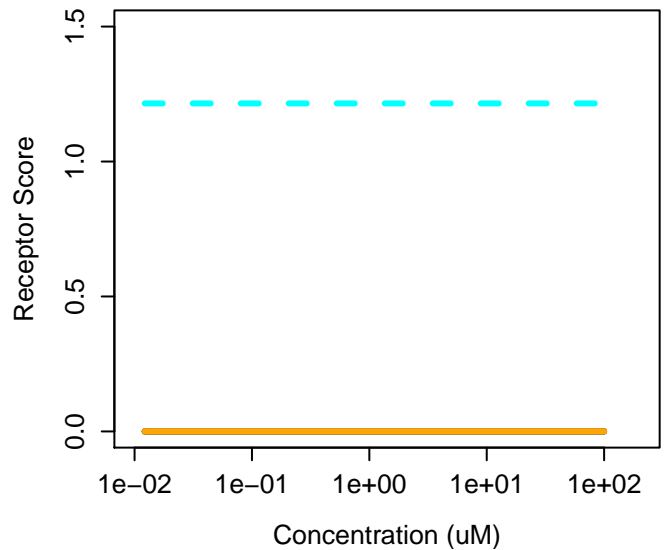

115-86-6 : Triphenyl phosphate

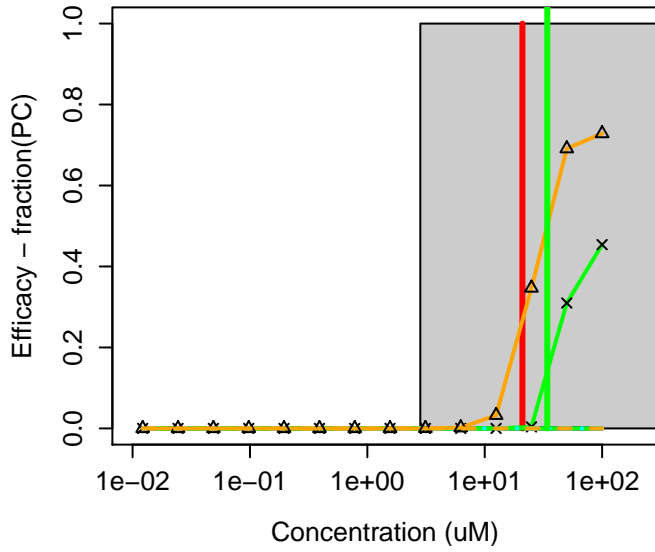

115-86-6 : Triphenyl phosphate  
Agonist: 0 Antagonist: 0.038

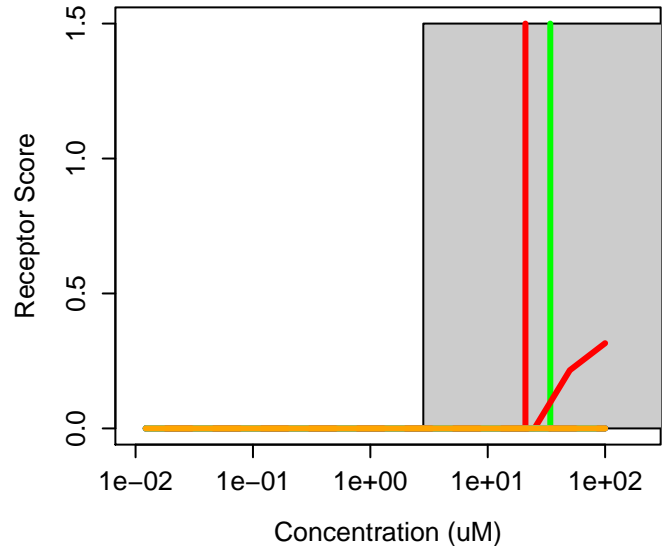

115-95-7 : Linalyl acetate

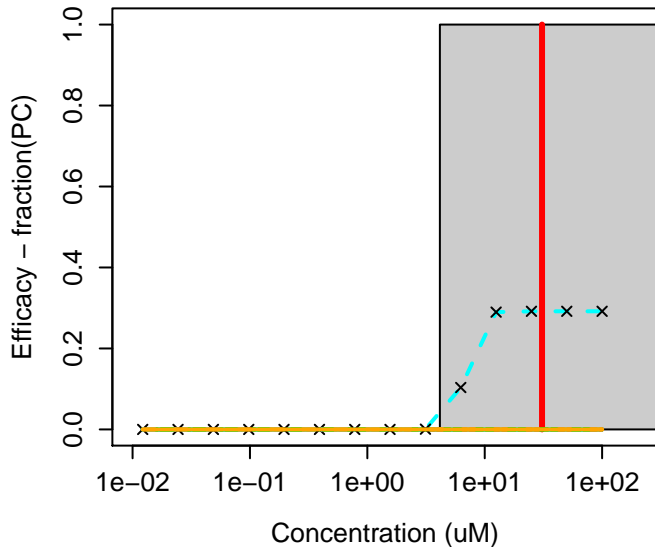

115-95-7 : Linalyl acetate  
Agonist: 0 Antagonist: 0

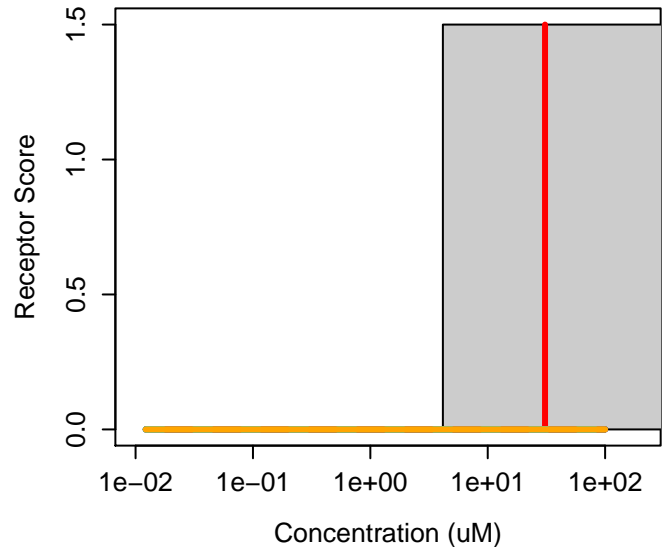

115-96-8 : Tris(2-chloroethyl) phosphate



115-96-8 : Tris(2-chloroethyl) phosphate  
Agonist: 0 Antagonist: 0



116-02-9 : 3,3,5-Trimethylcyclohexanol



116-02-9 : 3,3,5-Trimethylcyclohexanol  
Agonist: 0 Antagonist: 0



116-06-3 : Aldicarb

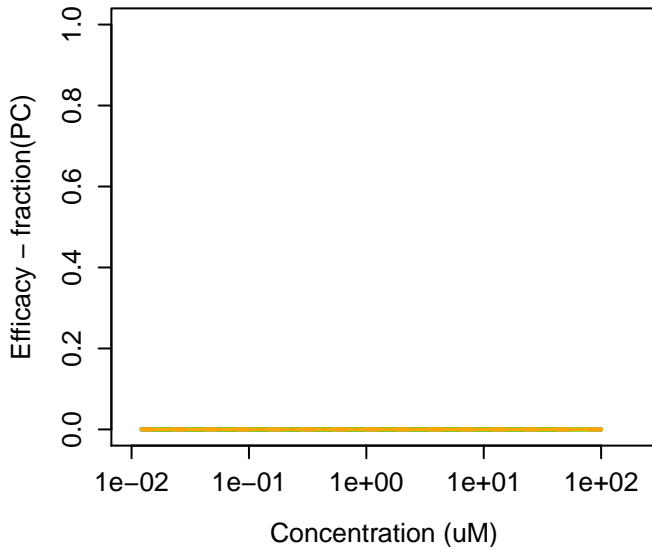

116-06-3 : Aldicarb  
Agonist: 0 Antagonist: 0



116255-48-2 : Bromuconazole

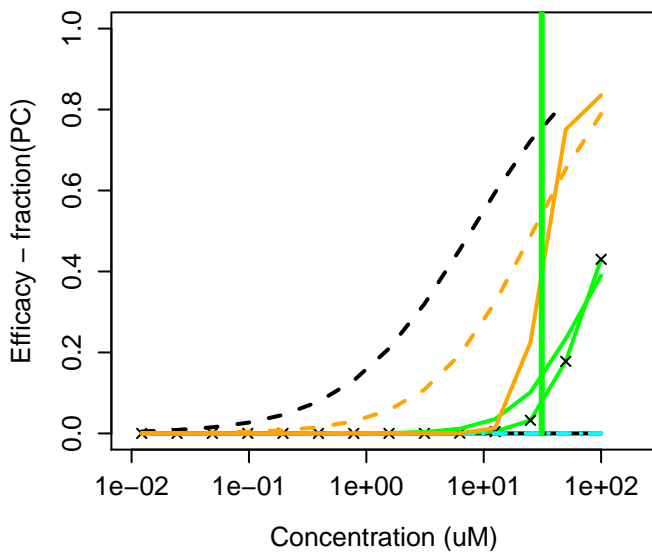

116255-48-2 : Bromuconazole  
Agonist: 0 Antagonist: 0.25

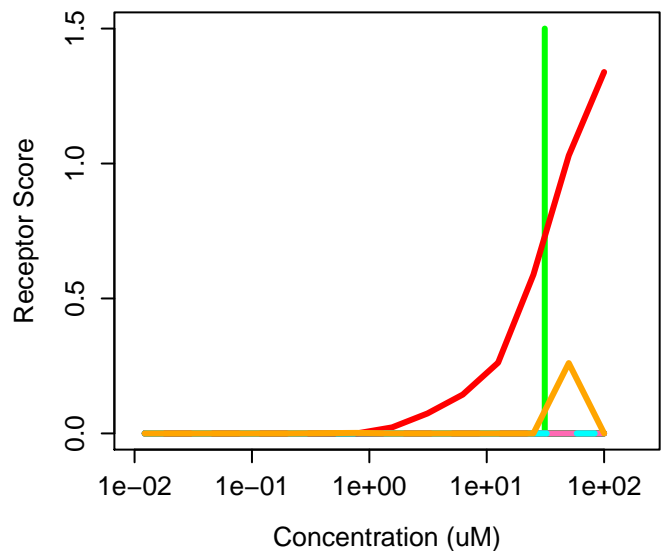

116-25-6 : 1-(Hydroxymethyl)-5,5-dimethylhydant    116-25-6 : 1-(Hydroxymethyl)-5,5-dimethylhydant  
Agonist: 0 Antagonist: 0

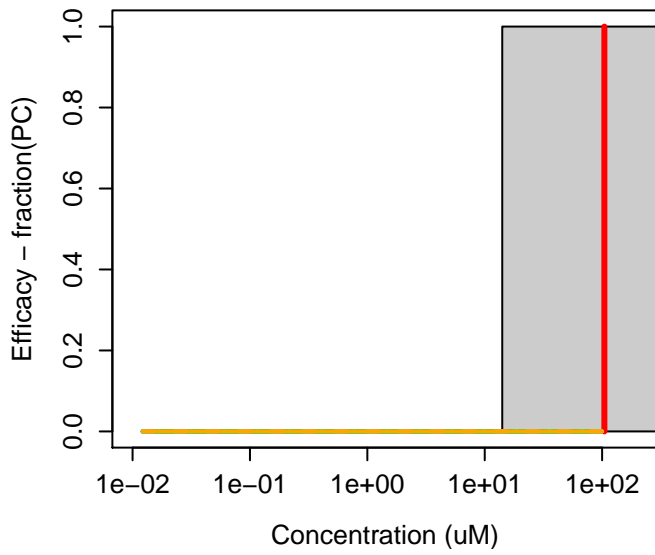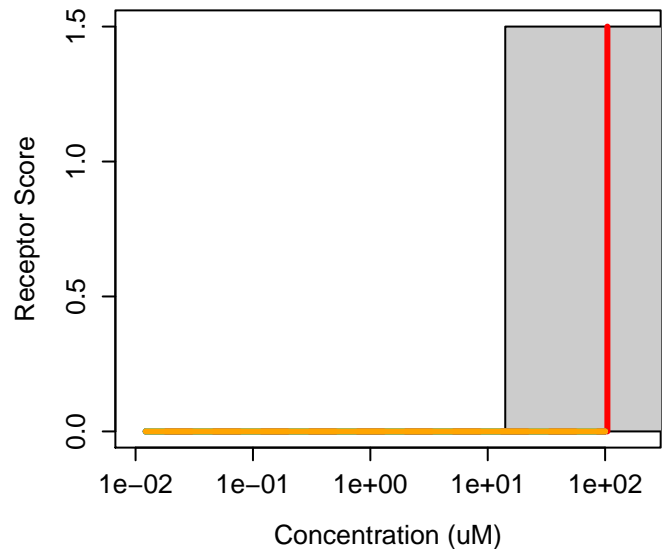

1166-52-5 : Dodecyl gallate

1166-52-5 : Dodecyl gallate  
Agonist: 0 Antagonist: 0.18

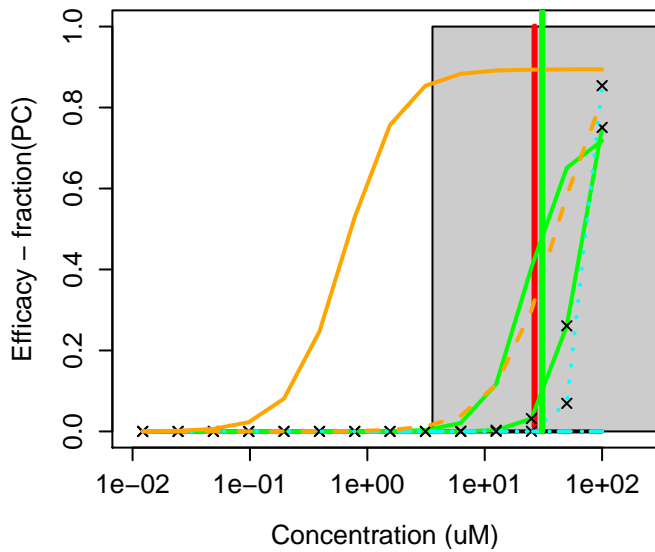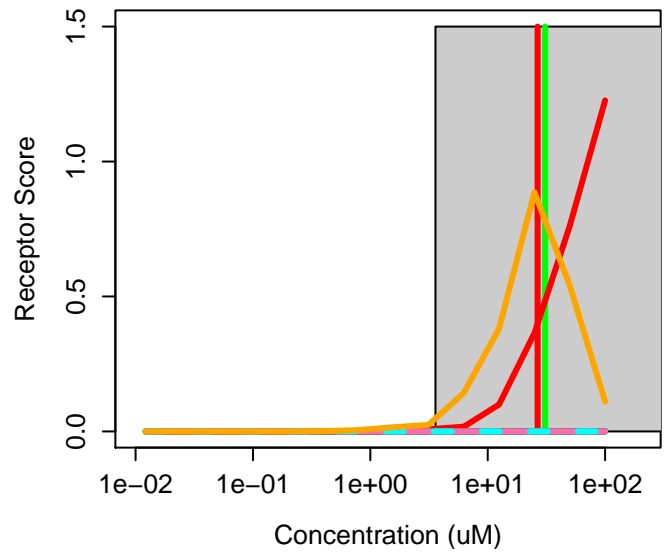

116714-46-6 : Novaluron

116714-46-6 : Novaluron  
Agonist: 0 Antagonist: 0

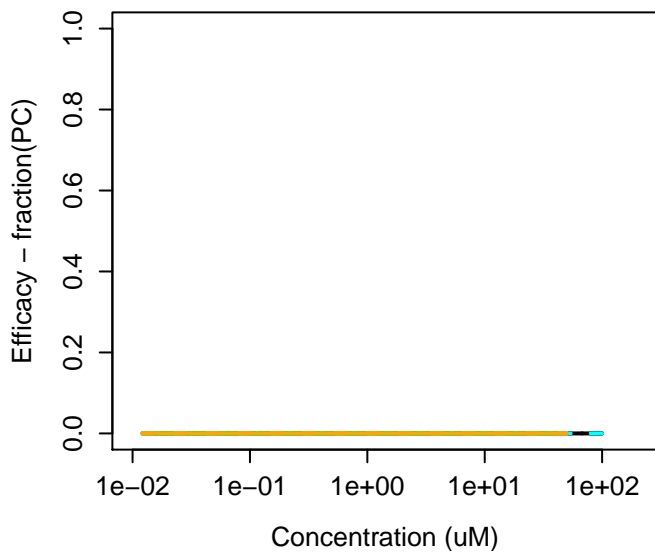

117-08-8 : Tetrachlorophthalic anhydride



117-08-8 : Tetrachlorophthalic anhydride  
Agonist: 0 Antagonist: 0



117337-19-6 : Fluthiacet-methyl

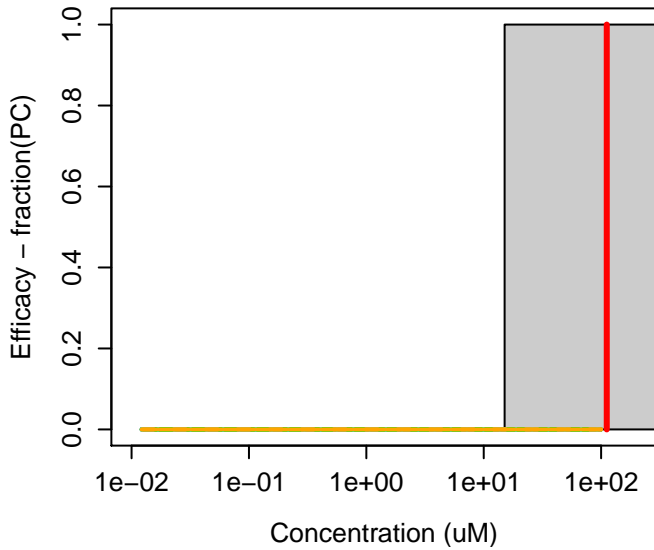

117337-19-6 : Fluthiacet-methyl  
Agonist: 0 Antagonist: 0

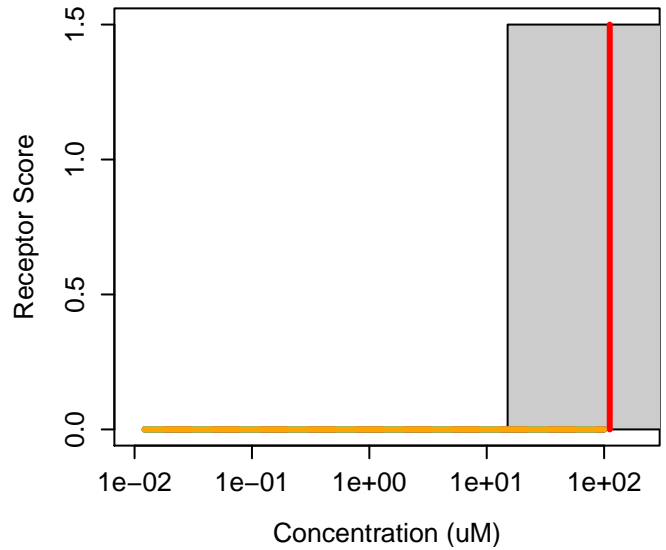

117-39-5 : Quercetin

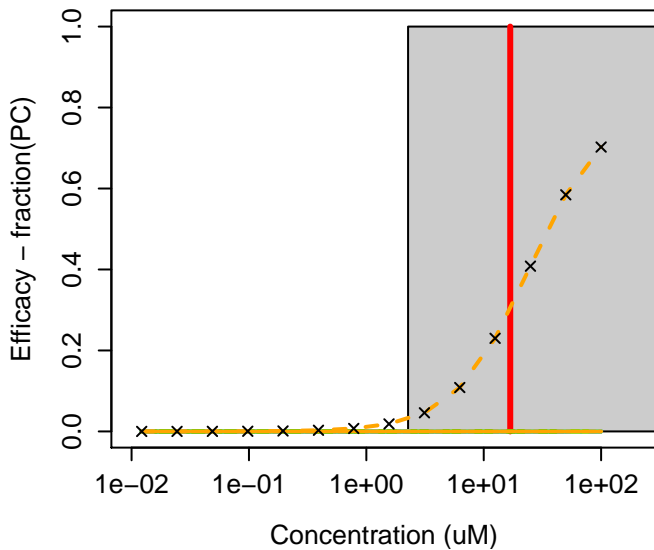

117-39-5 : Quercetin  
Agonist: 0 Antagonist: 0

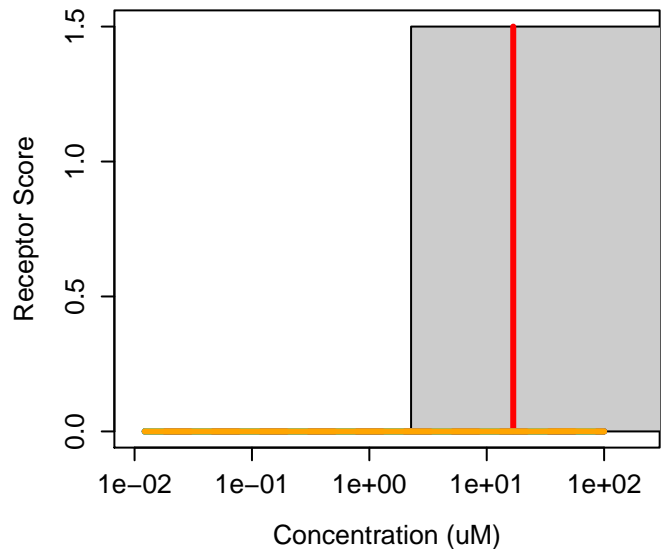

117428-22-5 : Picoxystrobin

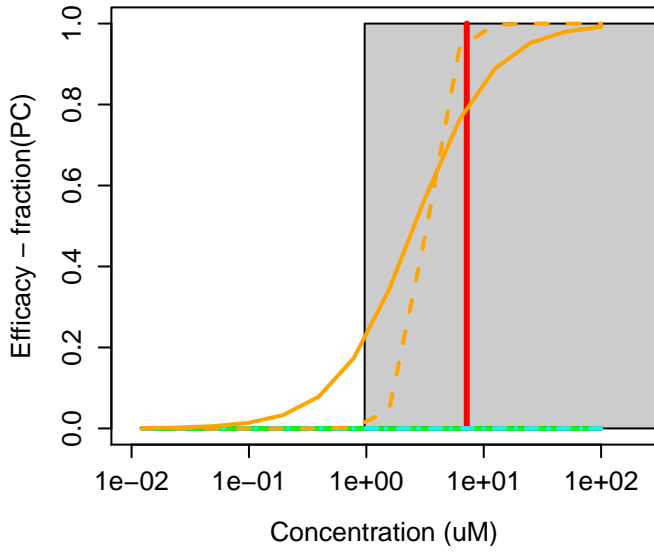

117428-22-5 : Picoxystrobin  
Agonist: 0 Antagonist: 0.00087

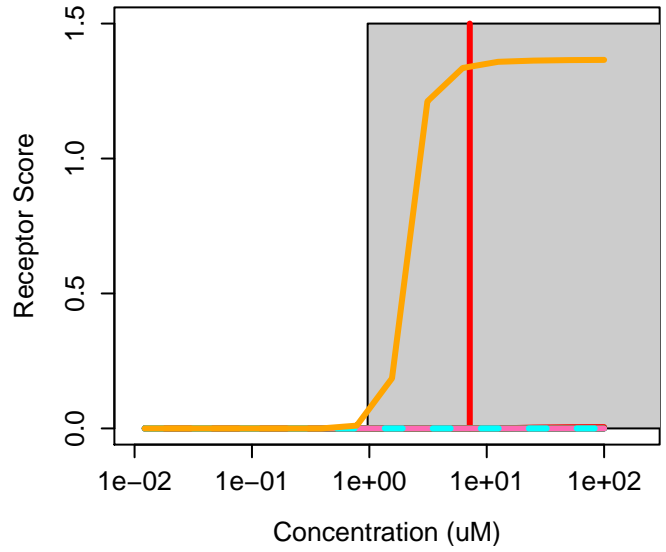

117718-60-2 : Thiazopyr

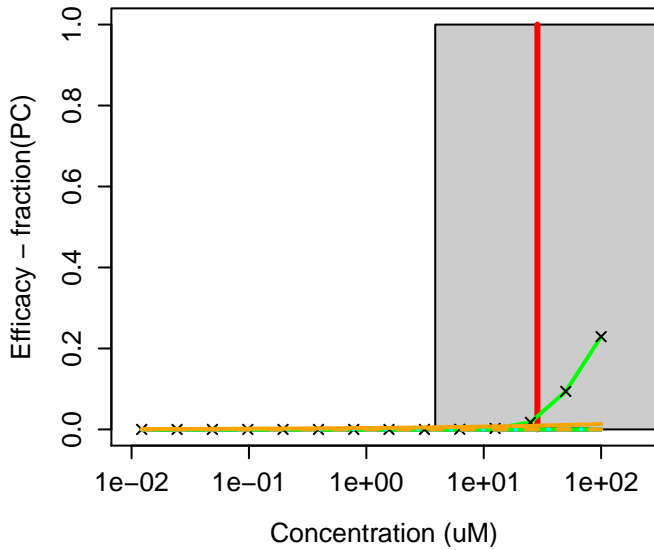

117718-60-2 : Thiazopyr  
Agonist: 0 Antagonist: 0.00066

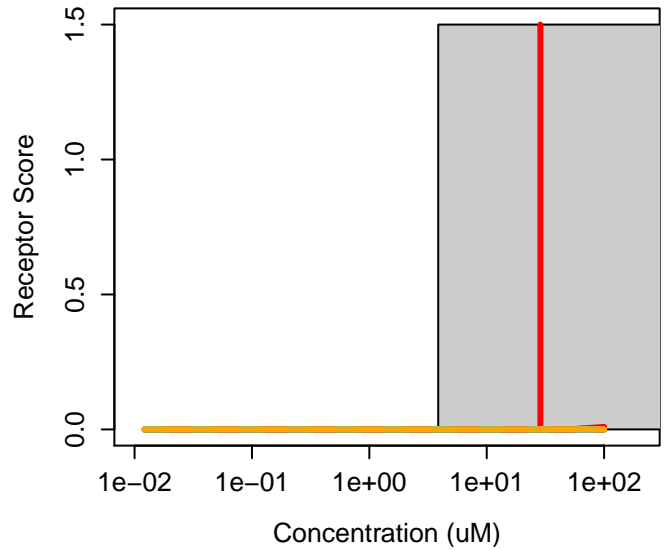

117-79-3 : 2-Aminoanthraquinone

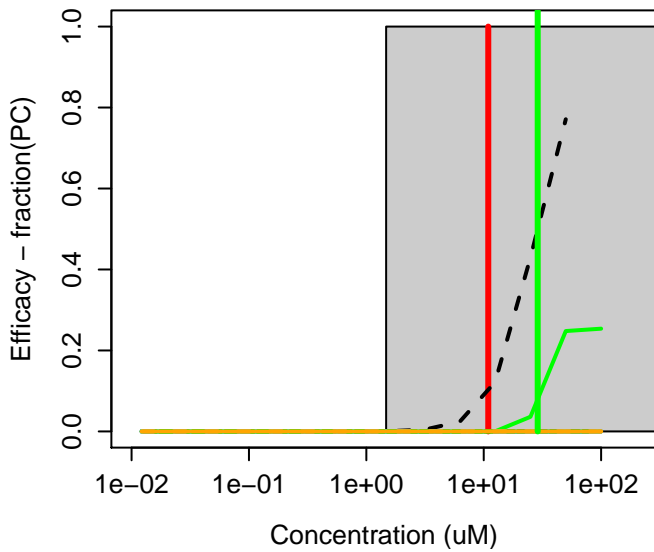

117-79-3 : 2-Aminoanthraquinone  
Agonist: 0.0099 Antagonist: 0.02

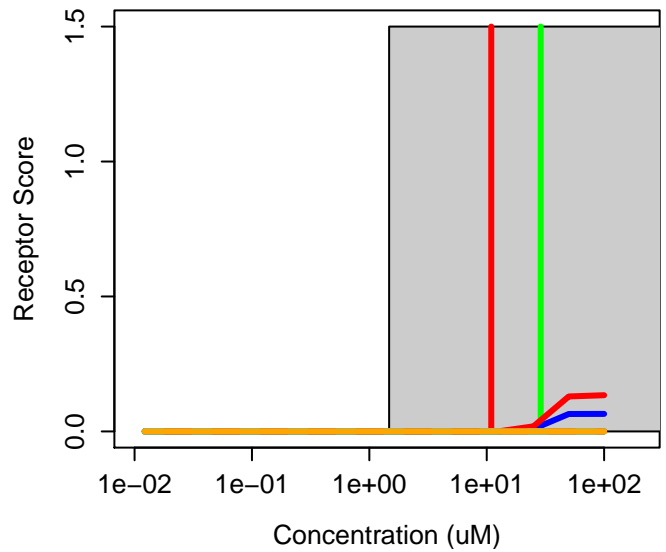

117-80-6 : Dichlone

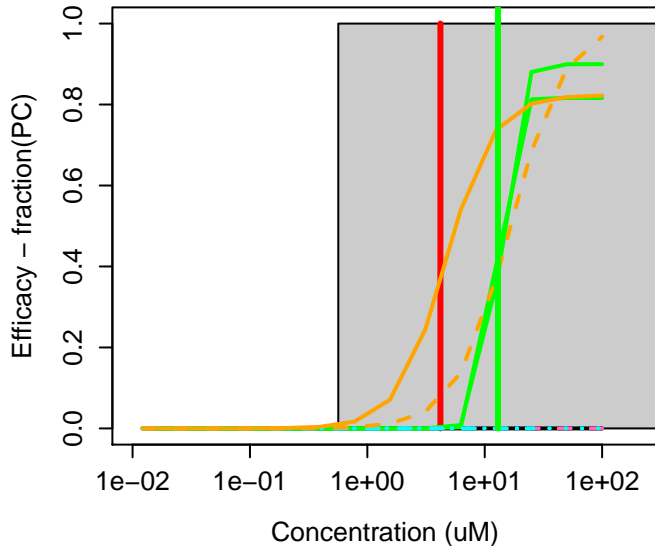

117-80-6 : Dichlone  
Agonist: 0 Antagonist: 0.33

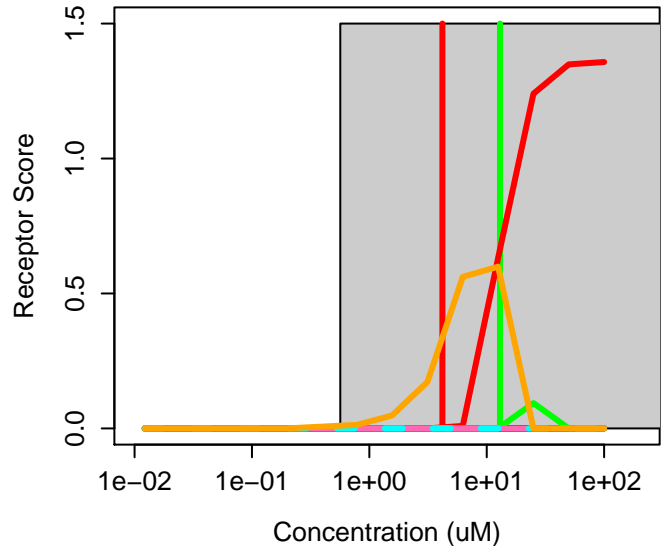

117-81-7 : Di(2-ethylhexyl) phthalate

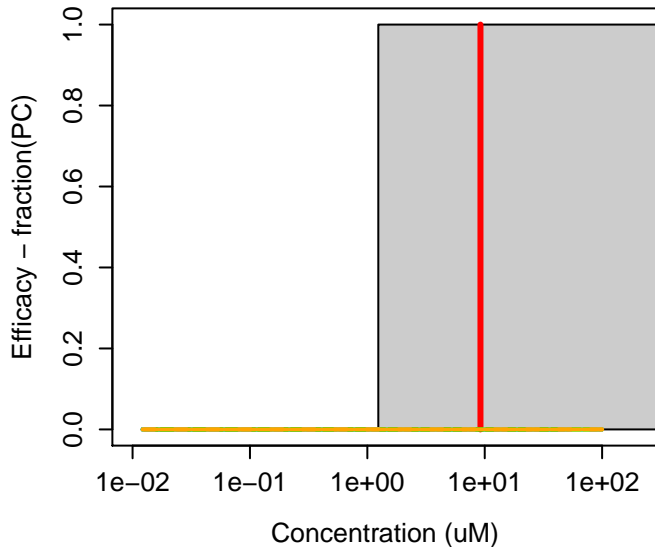

117-81-7 : Di(2-ethylhexyl) phthalate  
Agonist: 0 Antagonist: 0

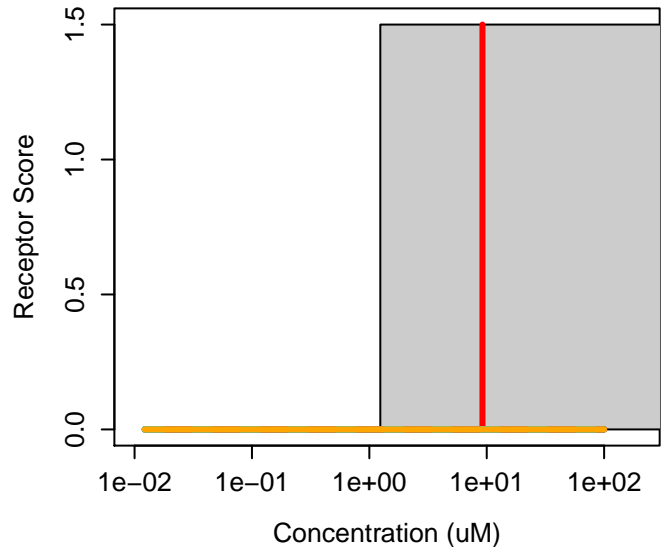

117-84-0 : Dioctyl phthalate

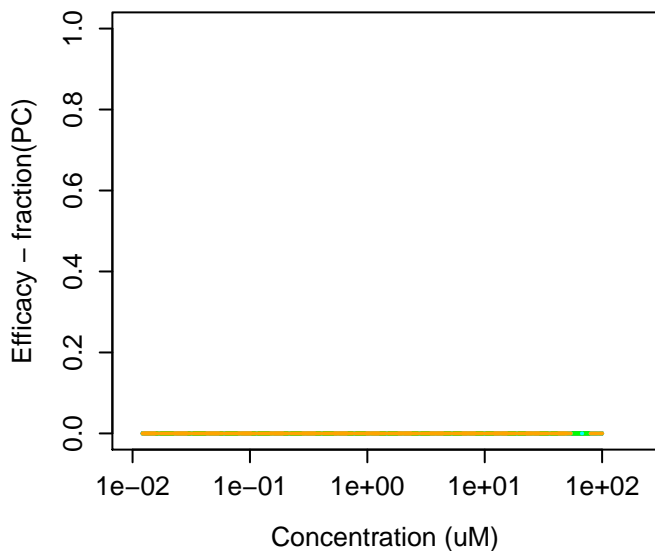

117-84-0 : Dioctyl phthalate  
Agonist: 0 Antagonist: 0



117-99-7 : 2-Hydroxybenzophenone



117-99-7 : 2-Hydroxybenzophenone  
Agonist: 0 Antagonist: 0



118134-30-8 : Spiroxamine

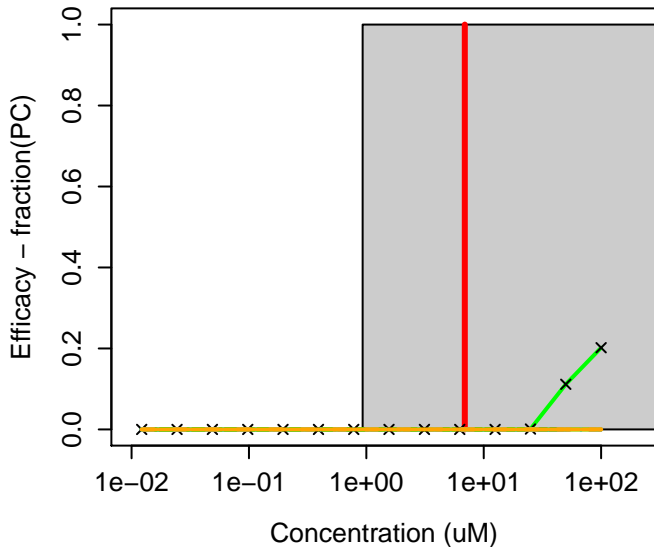

118134-30-8 : Spiroxamine  
Agonist: 0 Antagonist: 0

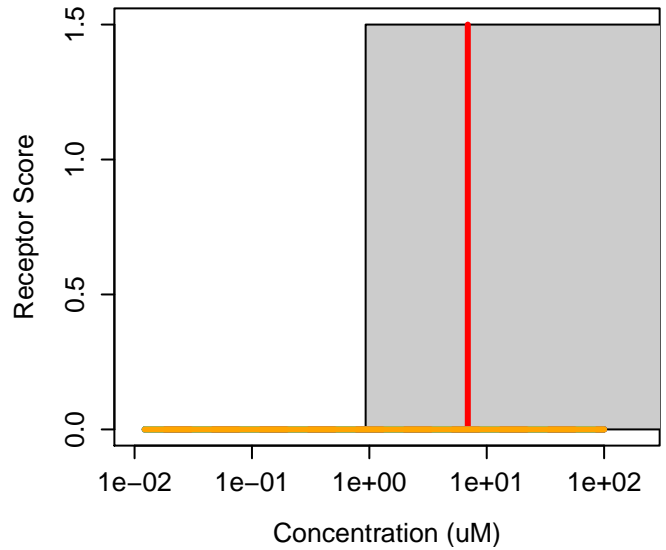

118-47-8 : Pyrazolone T



118-47-8 : Pyrazolone T  
Agonist: 0 Antagonist: 0





118-52-5 : 1,3-Dichloro-5,5-dimethylhydantoin



118-52-5 : 1,3-Dichloro-5,5-dimethylhydantoin  
Agonist: 0 Antagonist: 0



118-55-8 : Phenyl salicylate

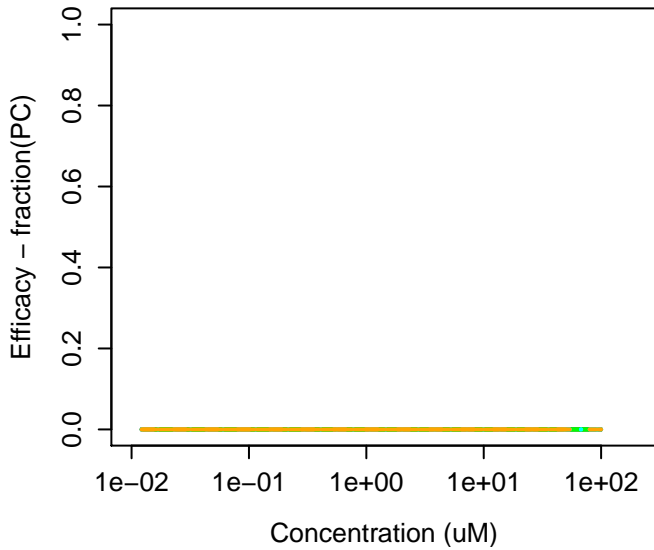

118-55-8 : Phenyl salicylate  
Agonist: 0 Antagonist: 0



118-56-9 : 3,3,5-Trimethylcyclohexyl salicylate

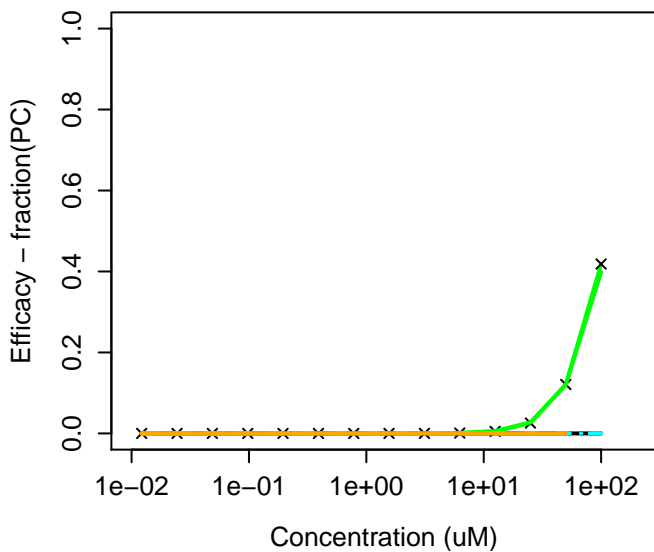

118-56-9 : 3,3,5-Trimethylcyclohexyl salicylate  
Agonist: 0 Antagonist: 0

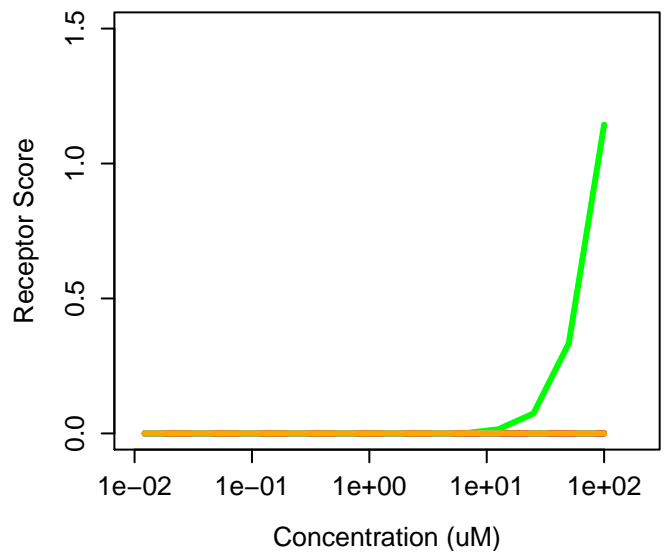

**118-58-1 : Benzyl salicylate**

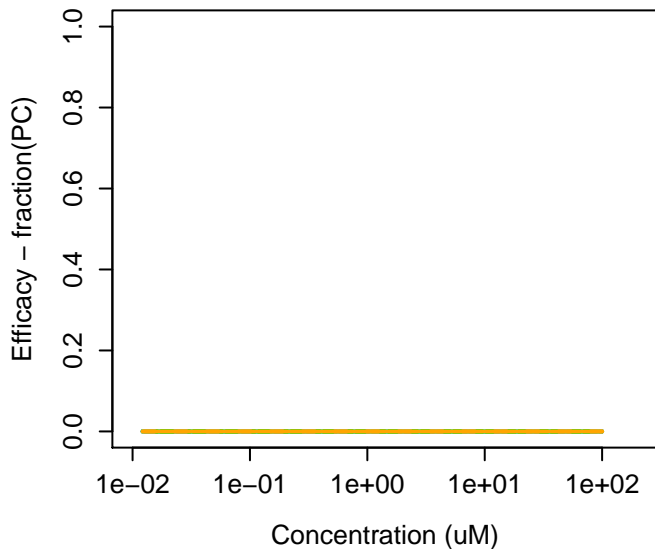

**118-58-1 : Benzyl salicylate**  
**Agonist: 0 Antagonist: 0**

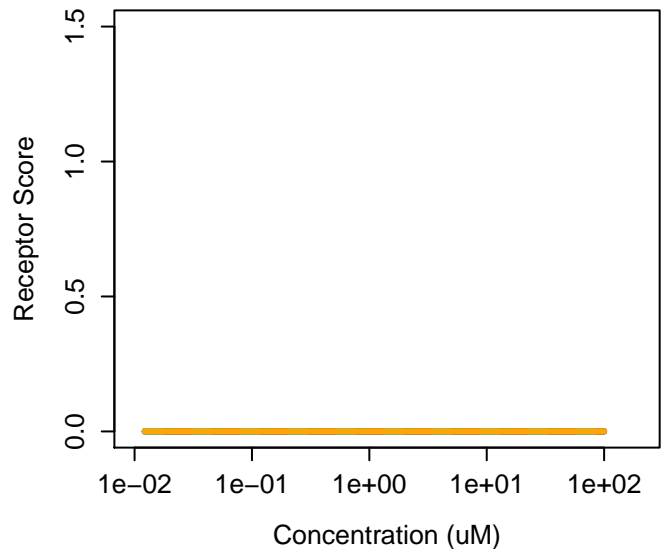

**118-71-8 : Maltol**



**118-71-8 : Maltol**  
**Agonist: 0 Antagonist: 0**

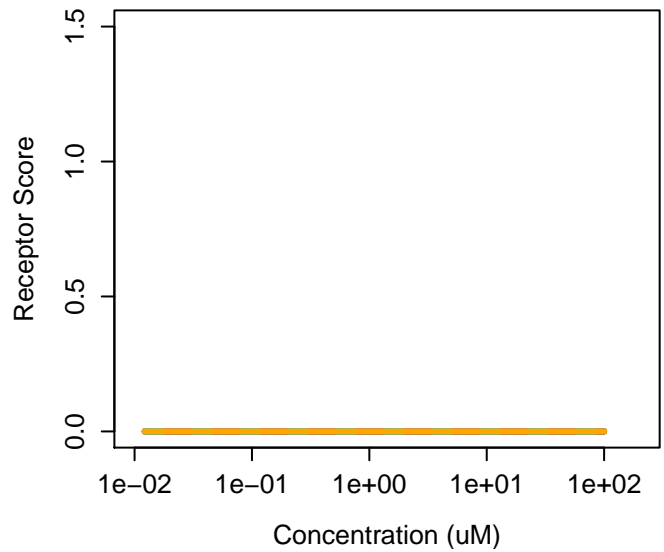

**118-79-6 : 2,4,6-Tribromophenol**

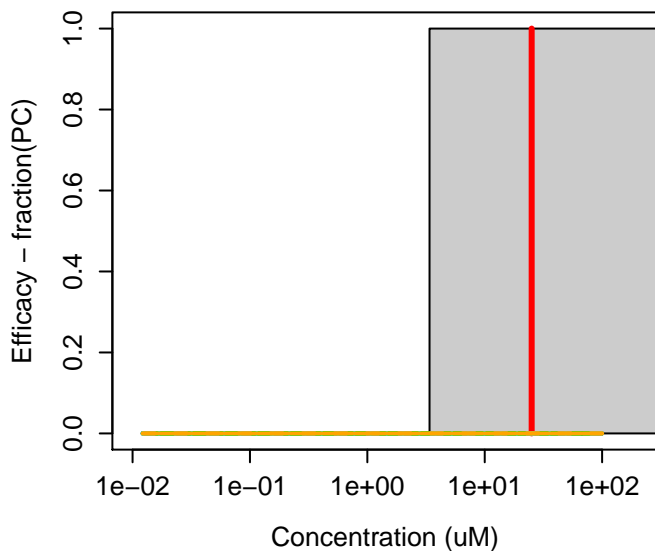

**118-79-6 : 2,4,6-Tribromophenol**  
**Agonist: 0 Antagonist: 0**

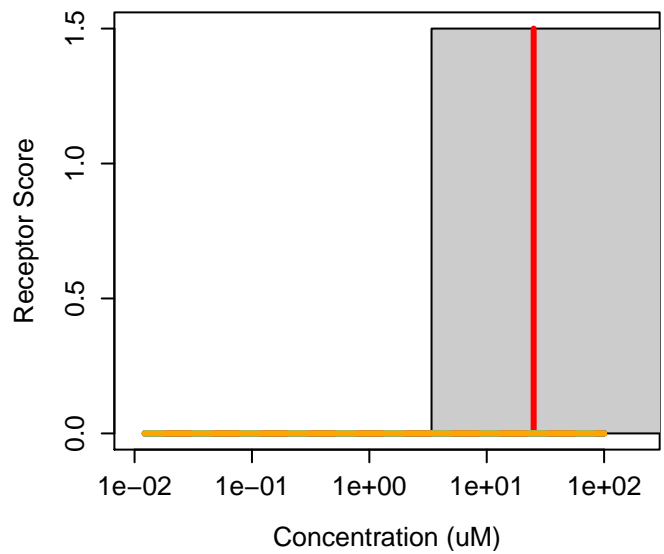

**118-82-1 : 4,4'-Methylenebis(2,6-di-t-butylphenol)**

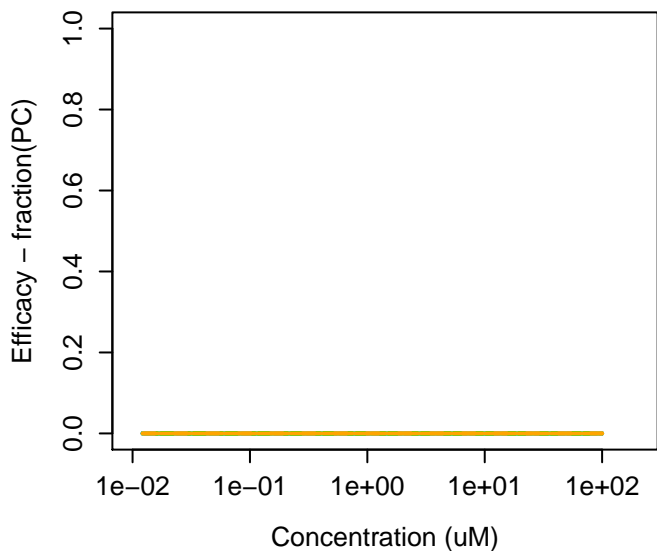

**118-82-1 : 4,4'-Methylenebis(2,6-di-t-butylphenol)  
Agonist: 0 Antagonist: 0**

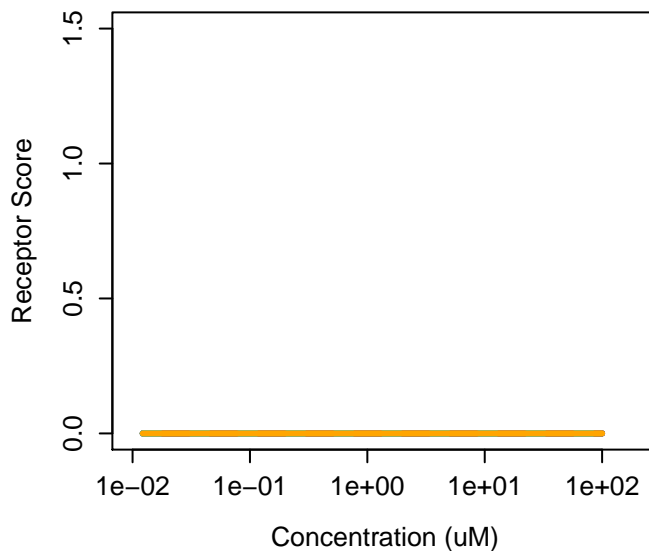

**1189-08-8 : 1,3-Butyleneglycol dimethacrylate**

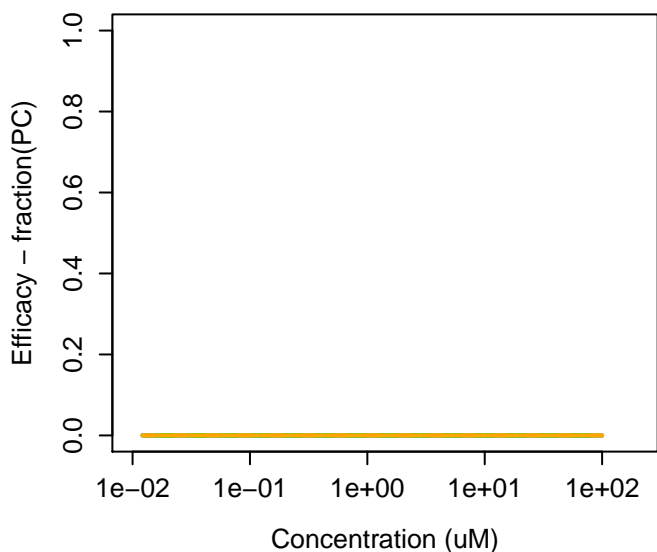

**1189-08-8 : 1,3-Butyleneglycol dimethacrylate  
Agonist: 0 Antagonist: 0**

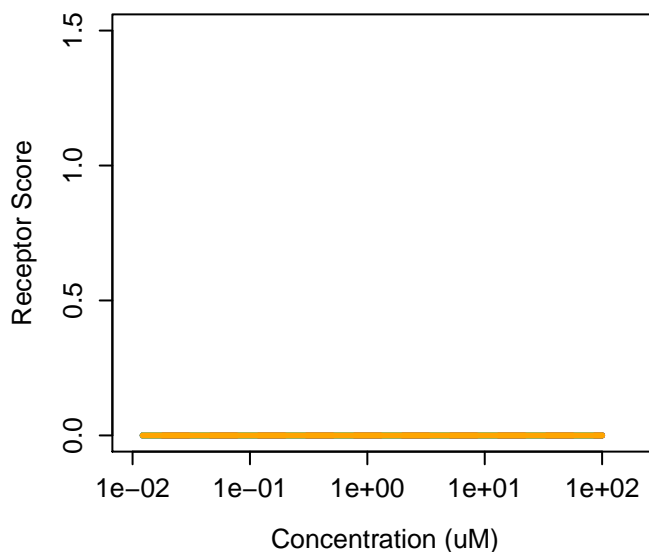

**118-93-4 : 2-Hydroxyacetophenone**

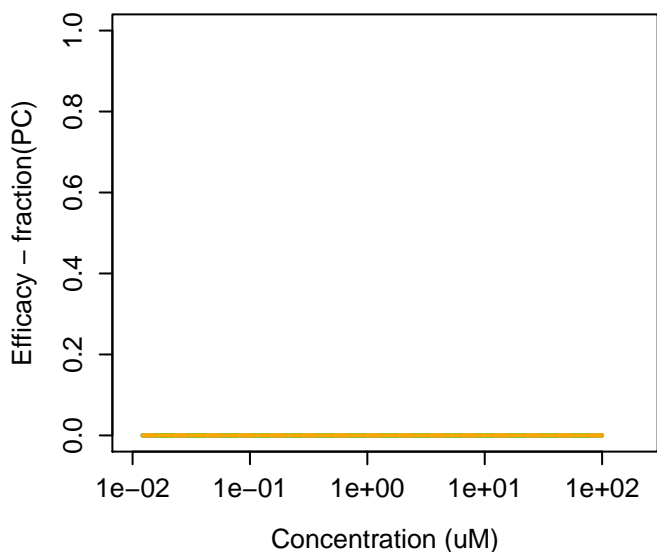

**118-93-4 : 2-Hydroxyacetophenone  
Agonist: 0 Antagonist: 0**

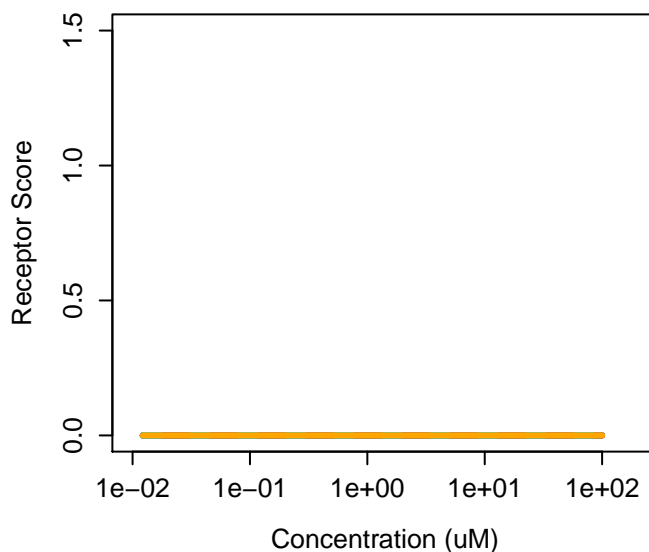

119-07-3 : Octyl decyl phthalate



119-07-3 : Octyl decyl phthalate  
Agonist: 0 Antagonist: 0



1191-50-0 : Sodium myristyl sulfate

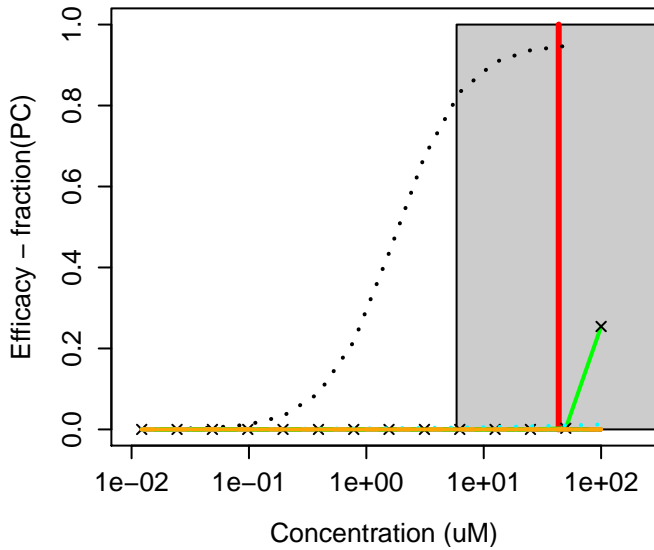

1191-50-0 : Sodium myristyl sulfate  
Agonist: 0.0065 Antagonist: 0.0091

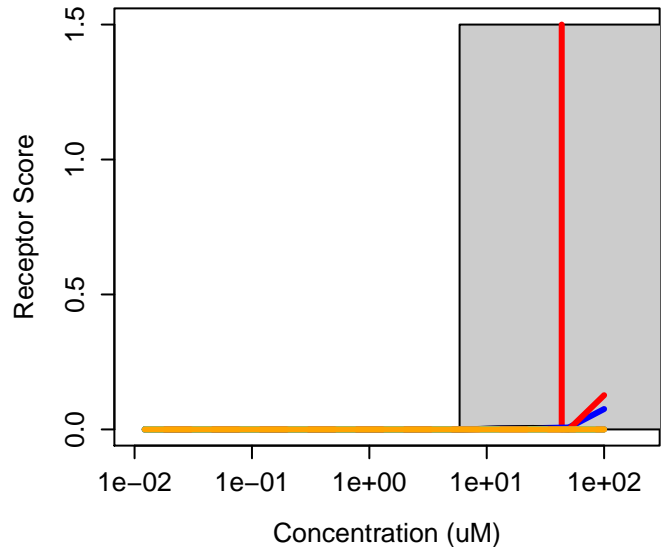

119168-77-3 : Tebufenpyrad

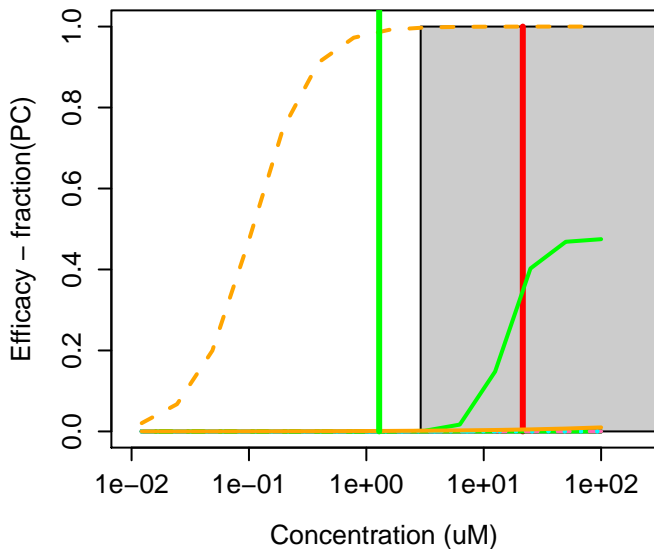

119168-77-3 : Tebufenpyrad  
Agonist: 0 Antagonist: 0.076

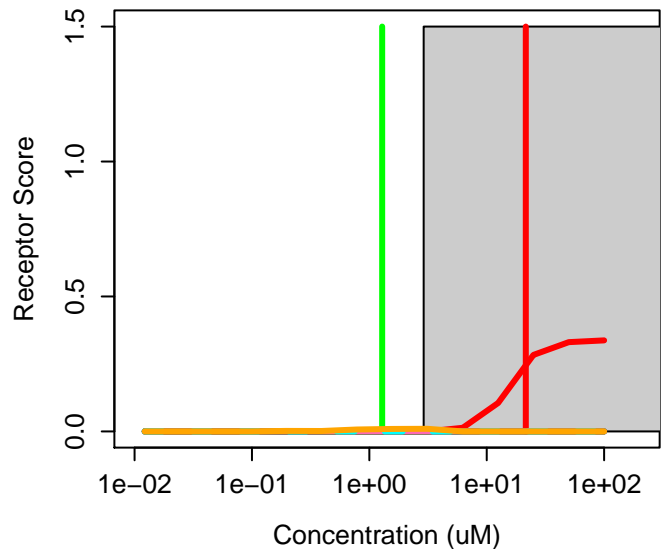

1191914-21-2 : PharmaGSID\_48521

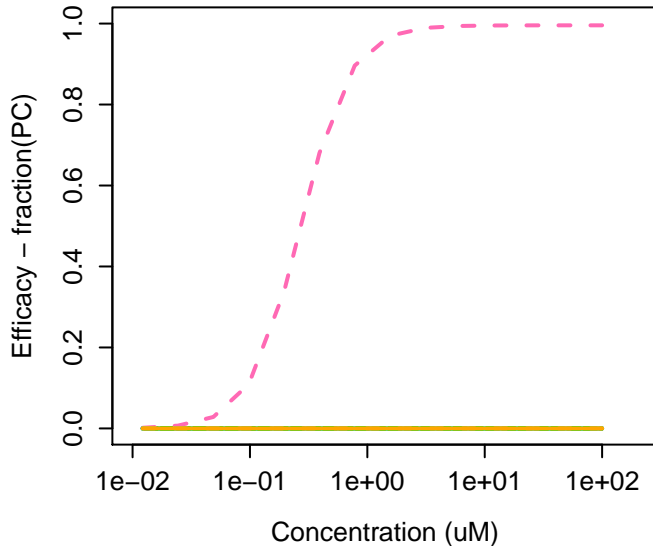

1191914-21-2 : PharmaGSID\_48521  
Agonist: 0 Antagonist: 0

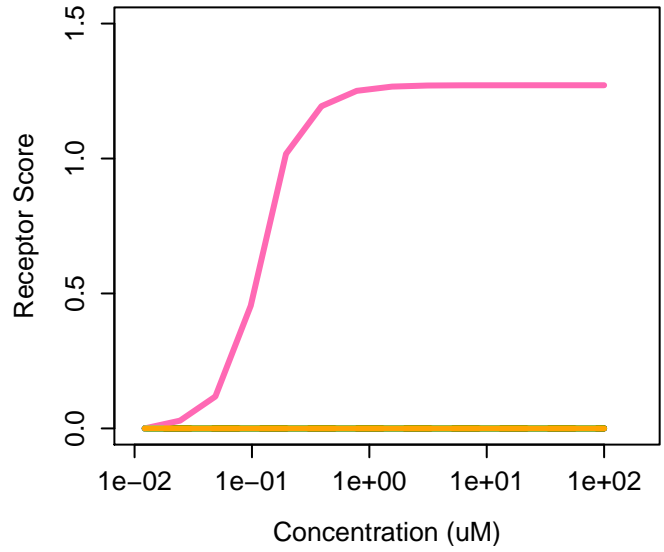

1192-52-5 : 4,5-Dichloro-3H-1,2-dithiol-3-one

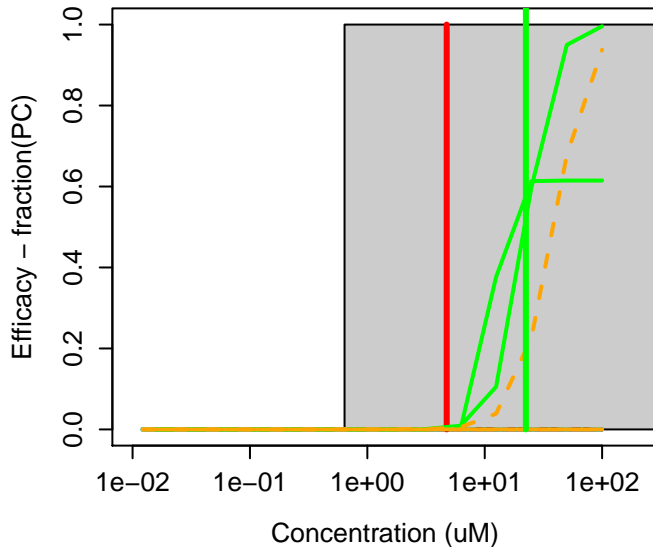

1192-52-5 : 4,5-Dichloro-3H-1,2-dithiol-3-one  
Agonist: 0 Antagonist: 0.11

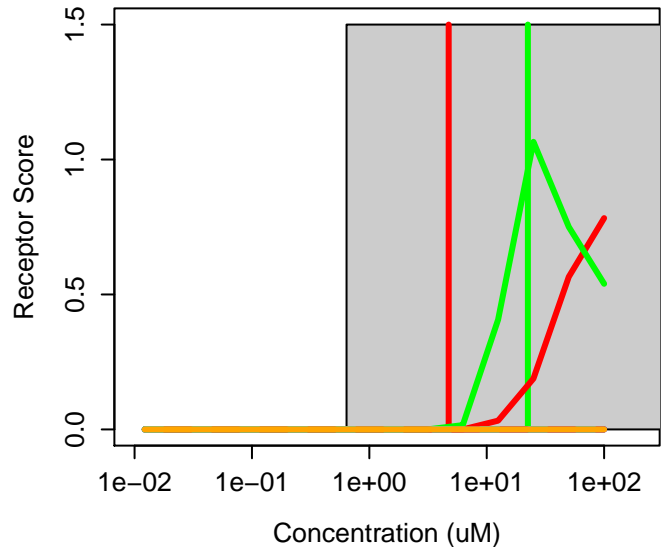

119-36-8 : Methyl salicylate

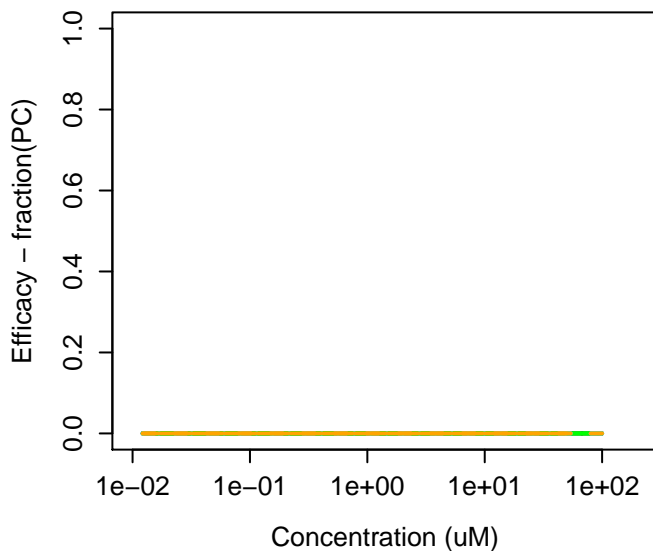

119-36-8 : Methyl salicylate  
Agonist: 0 Antagonist: 0



119446-68-3 : Difenoconazole

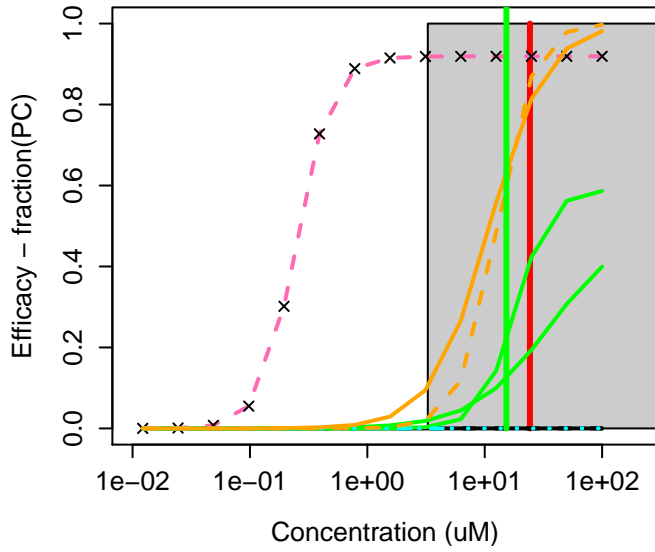

119446-68-3 : Difenoconazole  
Agonist: 0.0035 Antagonist: 0.16

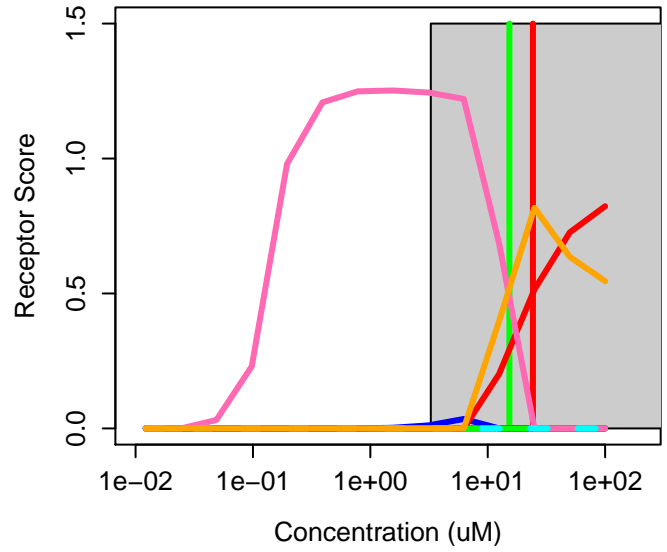

1194-65-6 : Dichlobenil

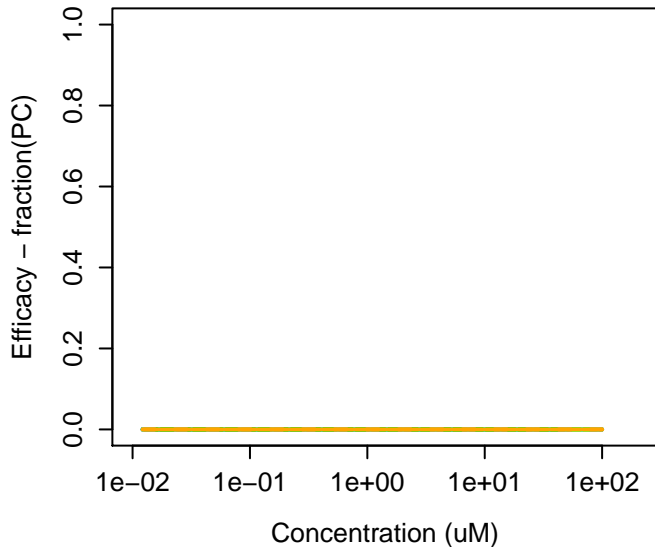

1194-65-6 : Dichlobenil  
Agonist: 0 Antagonist: 0



19-47-1 : 2,2'-Methylenebis(4-methyl-6-tert-butylp 19-47-1 : 2,2'-Methylenebis(4-methyl-6-tert-butylp  
Agonist: 0 Antagonist: 0.23

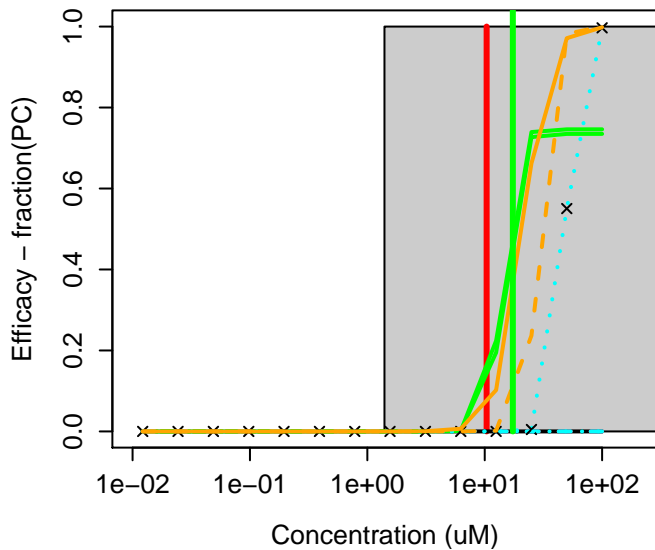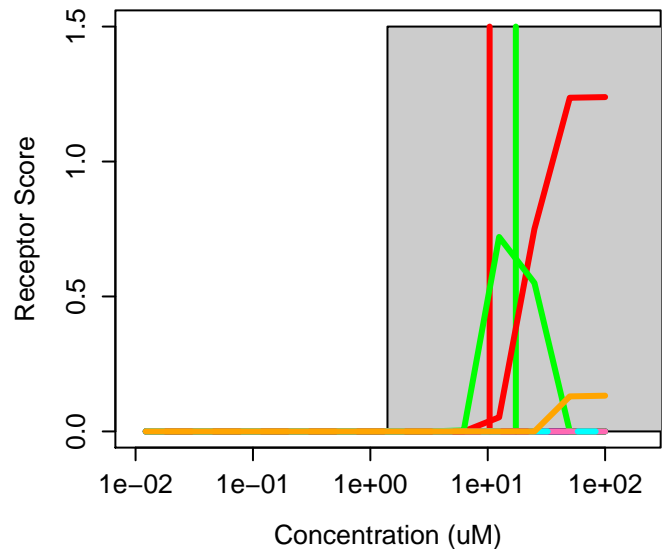

**119515-38-7 : Icaridin**



**119515-38-7 : Icaridin  
Agonist: 0 Antagonist: 0**



**119-53-9 : Benzoin**

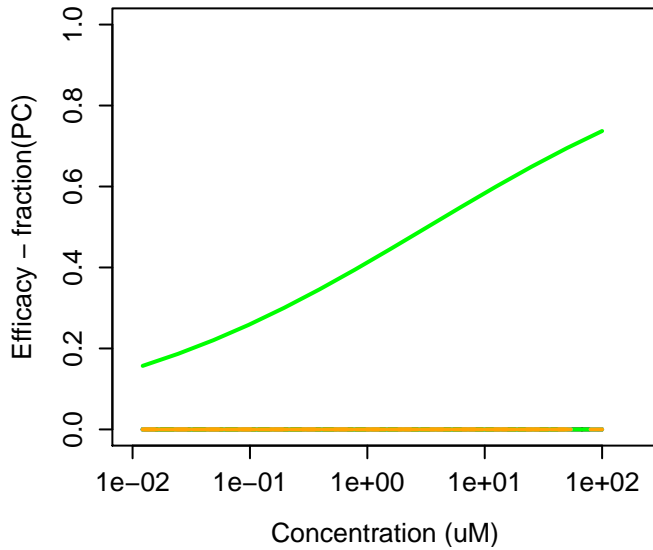

**119-53-9 : Benzoin  
Agonist: 0 Antagonist: 0**

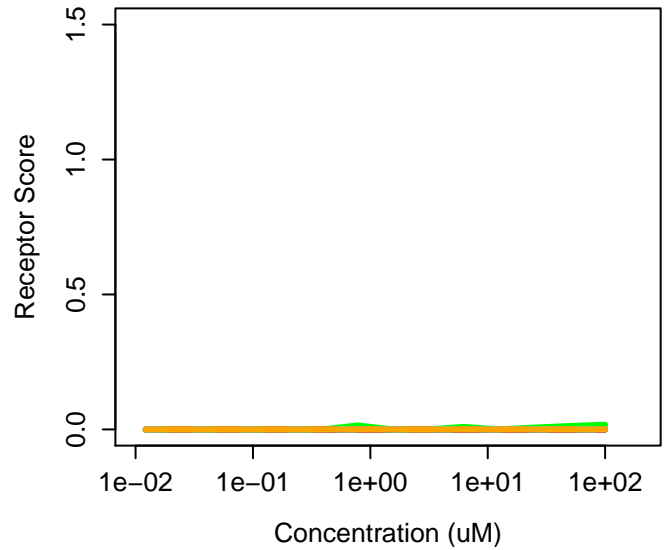

**119-61-9 : Benzophenone**

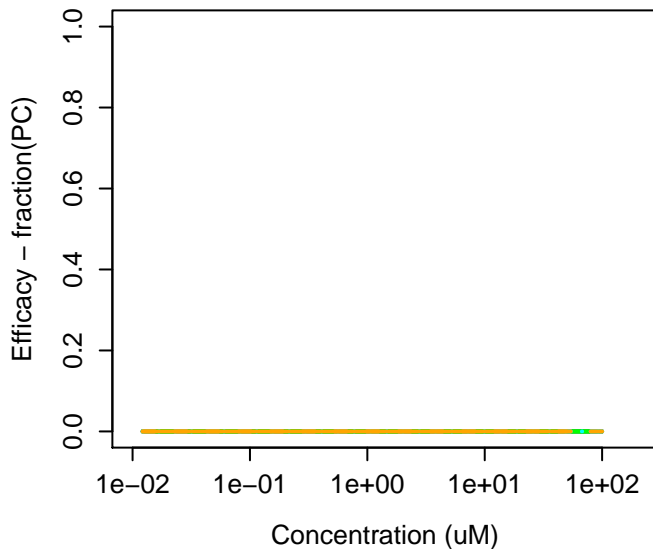

**119-61-9 : Benzophenone  
Agonist: 0 Antagonist: 0**



**119-64-2 : Tetralin**



**119-64-2 : Tetralin  
Agonist: 0 Antagonist: 0**



**119-90-4 : 3,3'-Dimethoxybenzidine**

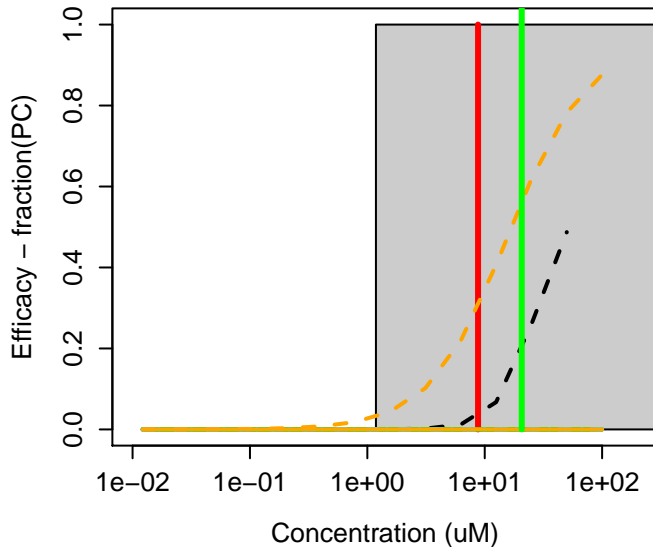

**119-90-4 : 3,3'-Dimethoxybenzidine  
Agonist: 0 Antagonist: 0.069**

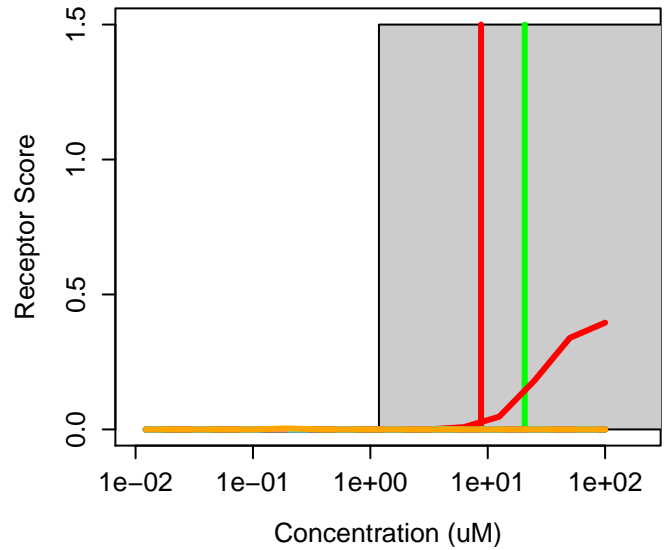

**119-93-7 : 3,3'-Dimethylbenzidine**

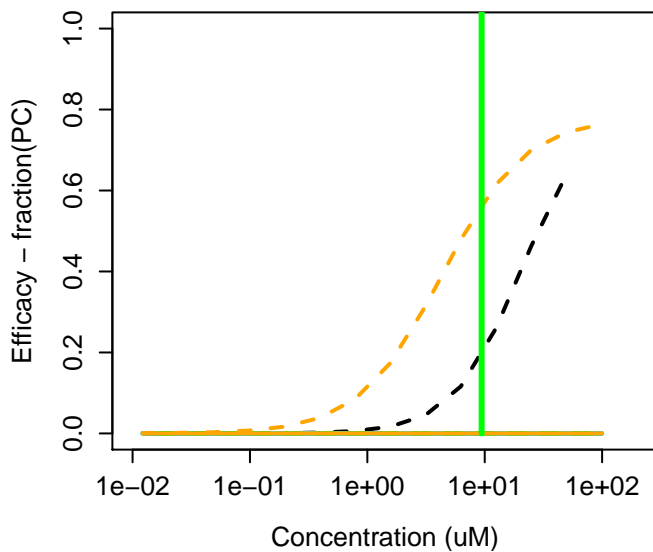

**119-93-7 : 3,3'-Dimethylbenzidine  
Agonist: 0 Antagonist: 0.11**

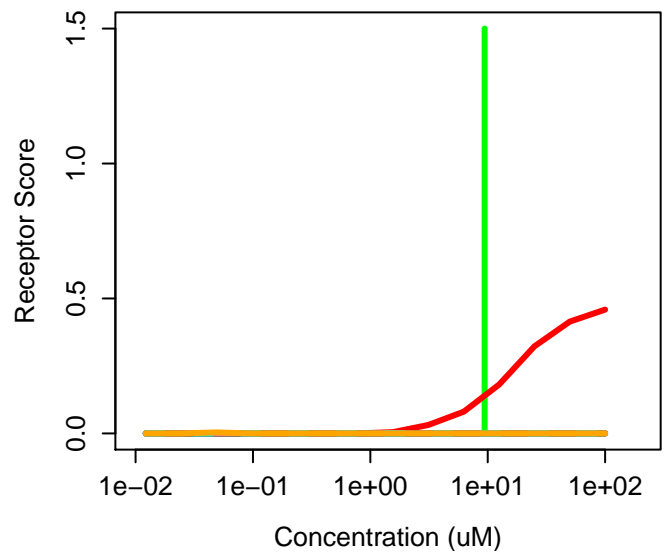



120068-37-3 : Fipronil

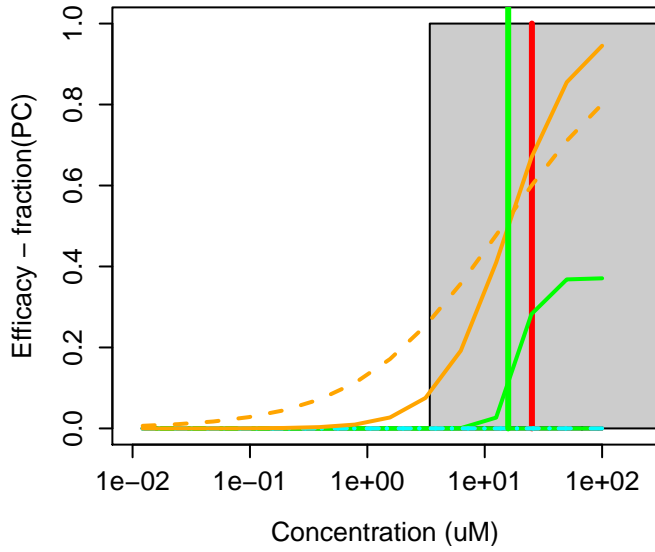

120068-37-3 : Fipronil  
Agonist: 0 Antagonist: 0.062

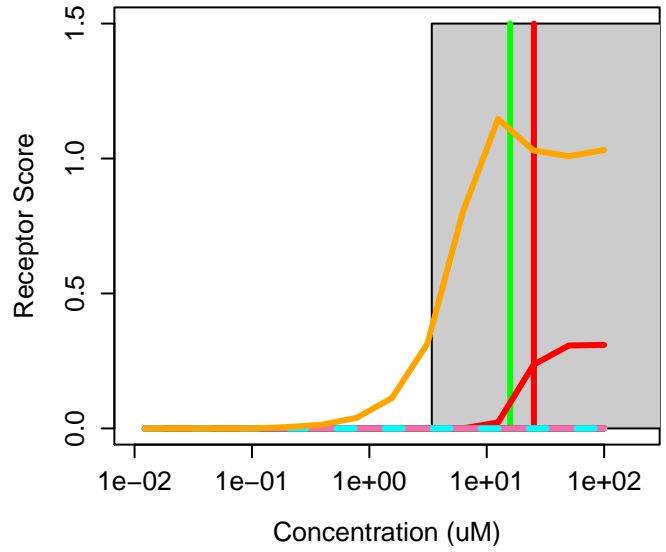

120116-88-3 : Cyazofamid

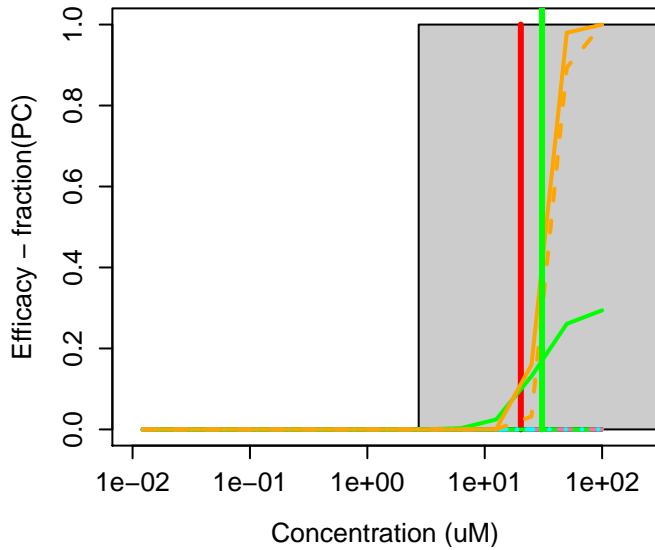

120116-88-3 : Cyazofamid  
Agonist: 0 Antagonist: 0.036

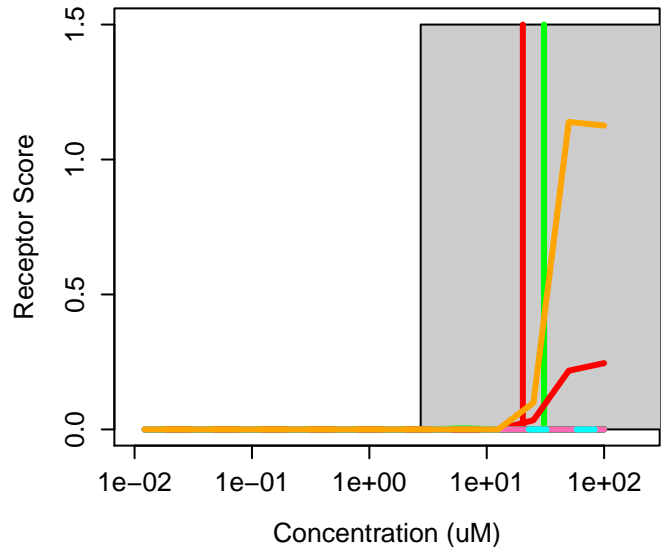

120-12-7 : Anthracene

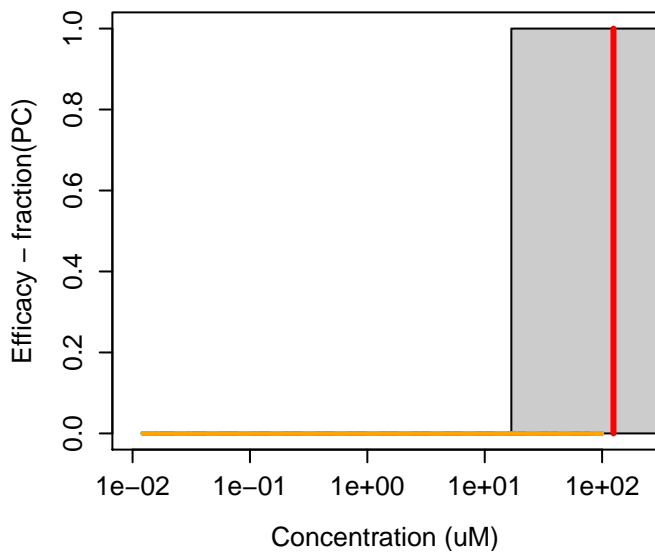

120-12-7 : Anthracene  
Agonist: 0 Antagonist: 0

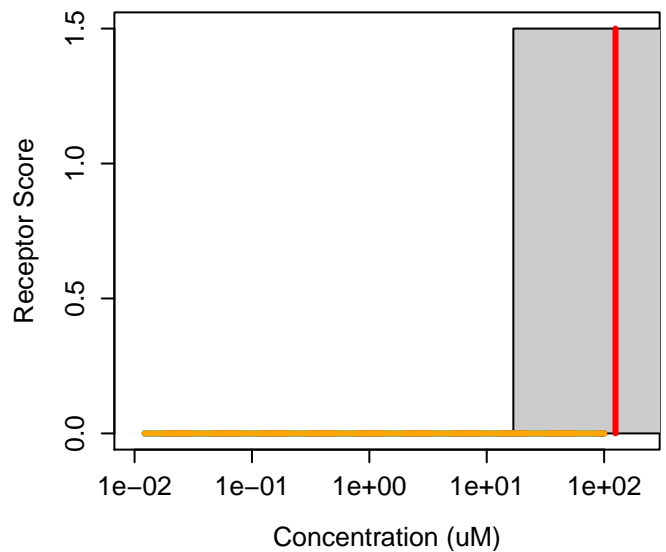

120-14-9 : Veratraldehyde



120-14-9 : Veratraldehyde  
Agonist: 0 Antagonist: 0



120-18-3 : Naphthalene-2-sulfonic acid

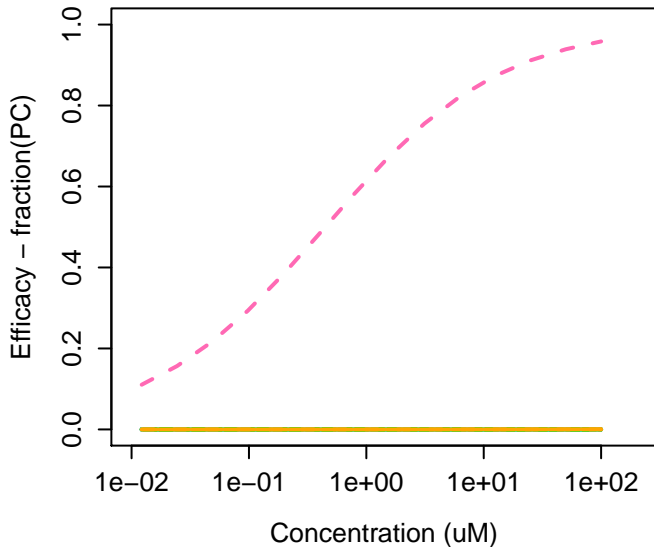

120-18-3 : Naphthalene-2-sulfonic acid  
Agonist: 0 Antagonist: 0

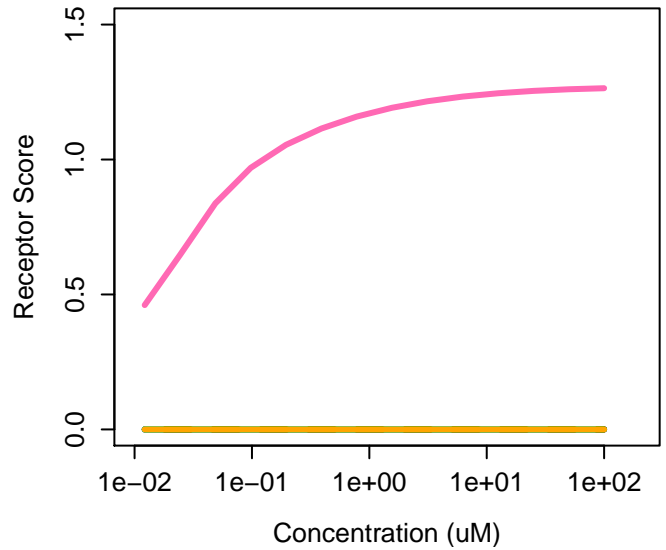

120-32-1 : Clorophene

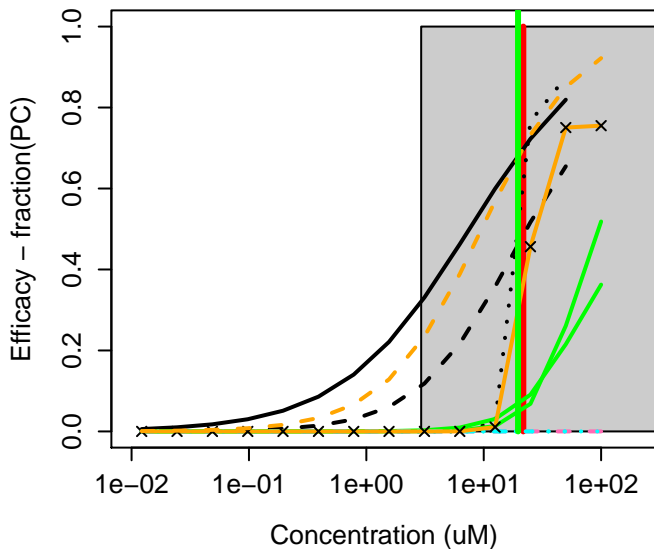

120-32-1 : Clorophene  
Agonist: 0 Antagonist: 0.39

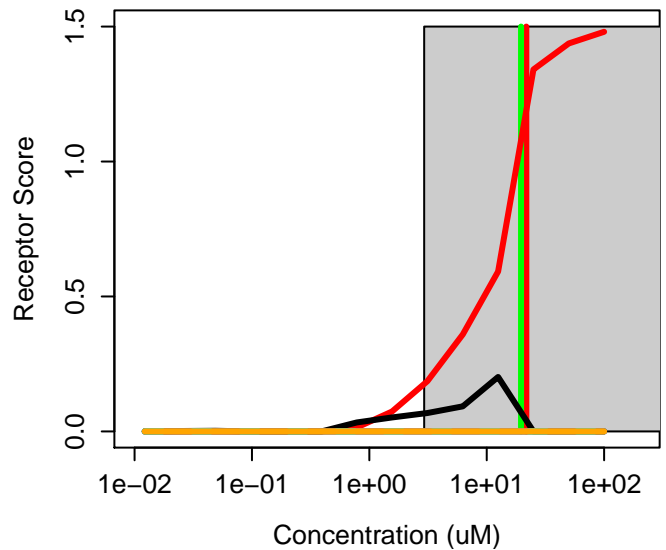

120-36-5 : Dichlorprop



120-36-5 : Dichlorprop  
Agonist: 0 Antagonist: 0



120-46-7 : 1,3-Diphenyl-1,3-propanedione

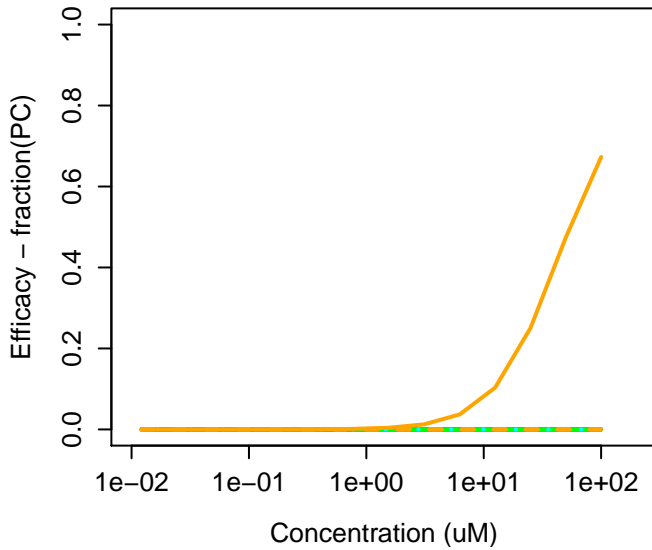

120-46-7 : 1,3-Diphenyl-1,3-propanedione  
Agonist: 0 Antagonist: 0



120-47-8 : Ethylparaben

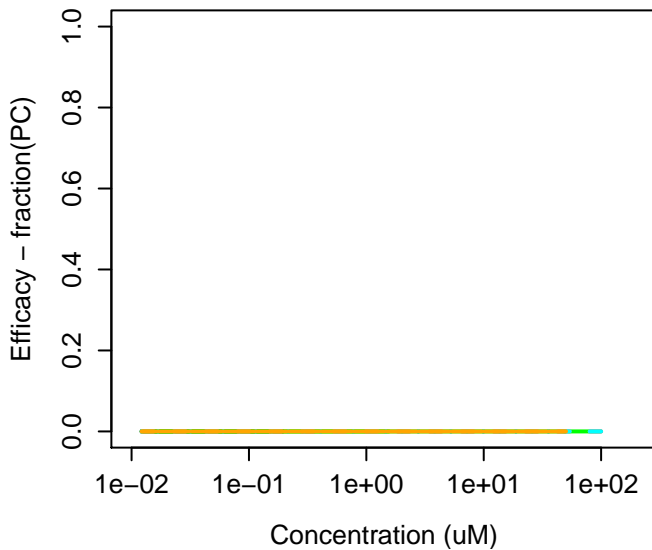

120-47-8 : Ethylparaben  
Agonist: 0 Antagonist: 0



**120511-73-1 : Anastrozole**

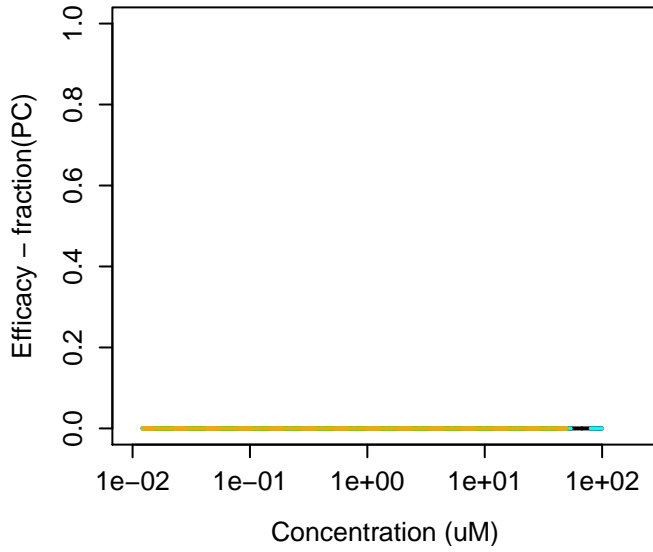

**120511-73-1 : Anastrozole  
Agonist: 0 Antagonist: 0**



**120-51-4 : Benzyl benzoate**

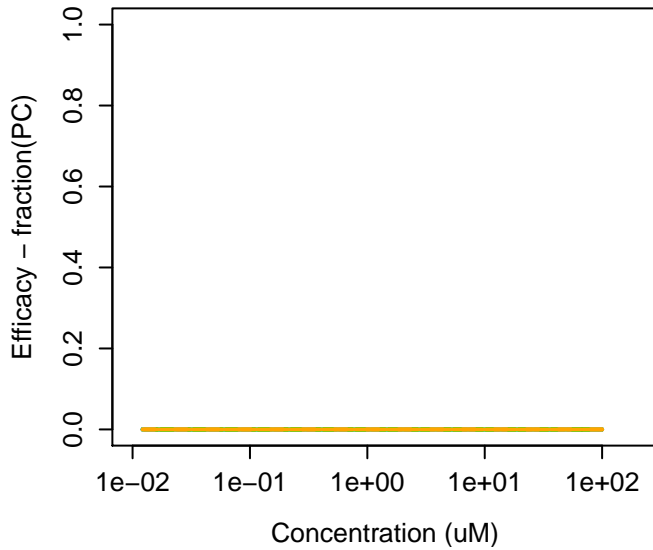

**120-51-4 : Benzyl benzoate  
Agonist: 0 Antagonist: 0**



**120-55-8 : Diethylene glycol dibenzoate**



**120-55-8 : Diethylene glycol dibenzoate  
Agonist: 0 Antagonist: 0**



**120-56-9 : Triethylene glycol dibenzoate**

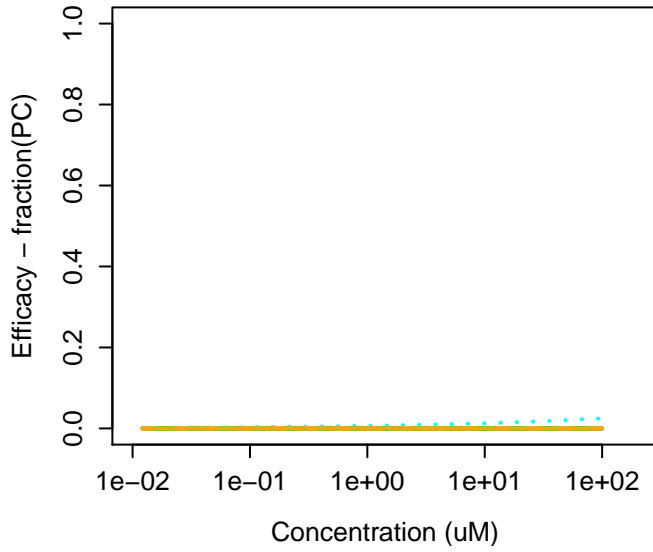

**120-56-9 : Triethylene glycol dibenzoate  
Agonist: 0 Antagonist: 0**

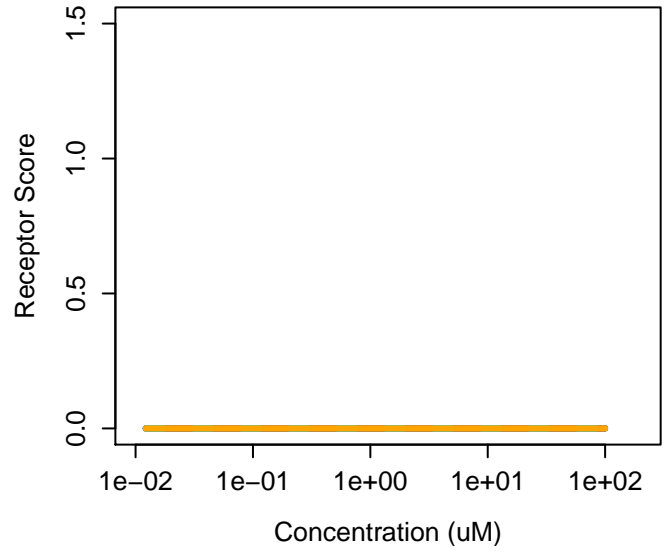

**120-61-6 : Dimethyl terephthalate**



**120-61-6 : Dimethyl terephthalate  
Agonist: 0 Antagonist: 0**



**120-65-0 : 2-((Dimethylamino)methyl)phenol**



**120-65-0 : 2-((Dimethylamino)methyl)phenol  
Agonist: 0 Antagonist: 0**



**120-71-8 : 2-Methoxy-5-methylaniline**

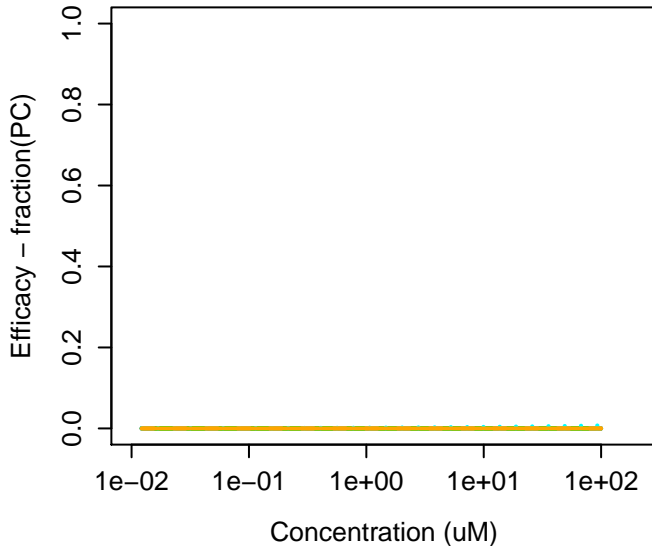

**120-71-8 : 2-Methoxy-5-methylaniline**  
**Agonist: 0 Antagonist: 0**

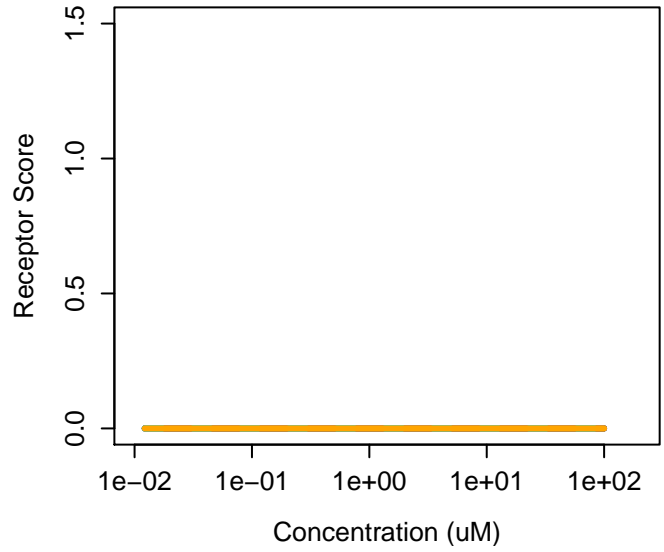

**120-72-9 : Indole**

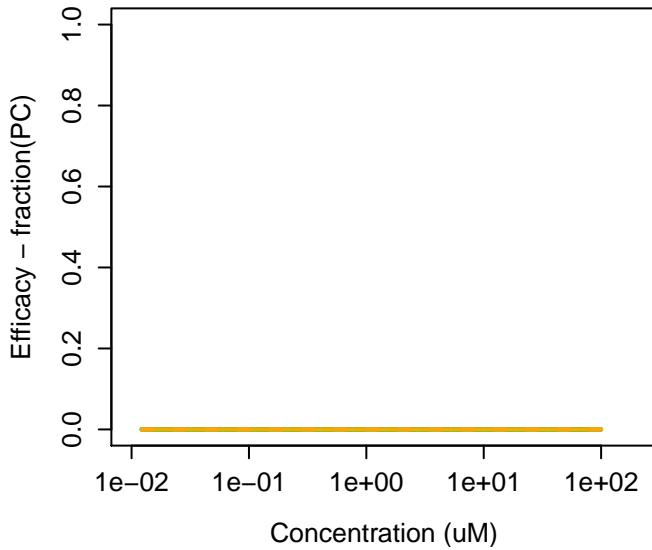

**120-72-9 : Indole**  
**Agonist: 0 Antagonist: 0**



**120-80-9 : Catechol**

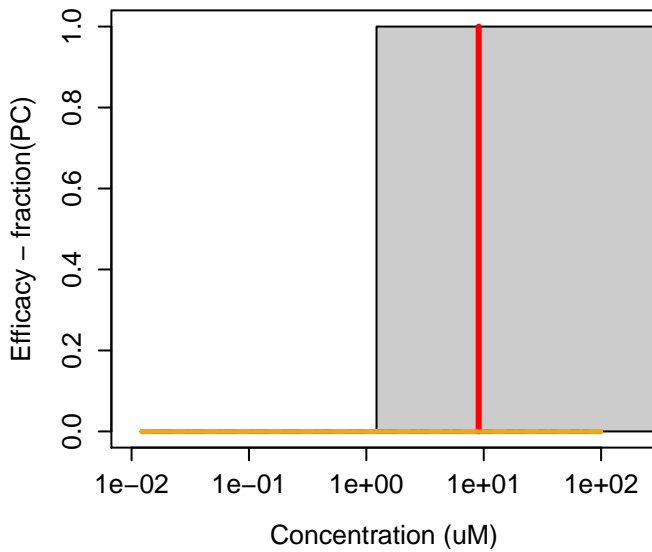

**120-80-9 : Catechol**  
**Agonist: 0 Antagonist: 0**

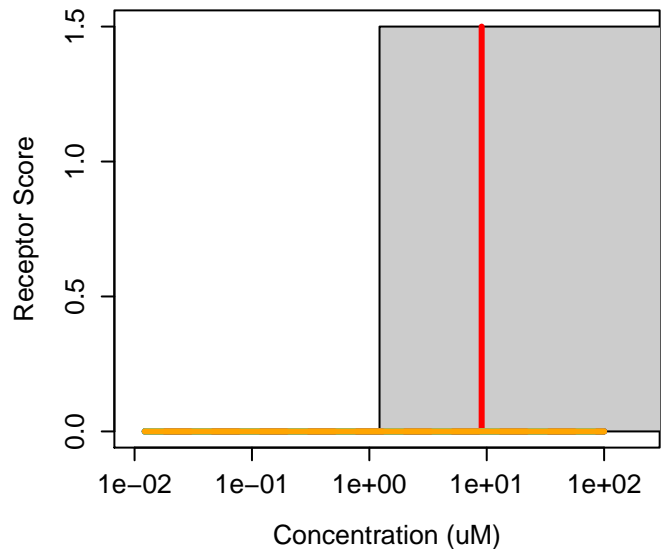

**120-82-1 : 1,2,4-Trichlorobenzene**



**120-82-1 : 1,2,4-Trichlorobenzene  
Agonist: 0 Antagonist: 0**



**120-83-2 : 2,4-Dichlorophenol**



**120-83-2 : 2,4-Dichlorophenol  
Agonist: 0 Antagonist: 0**



**120-92-3 : Cyclopentanone**



**120-92-3 : Cyclopentanone  
Agonist: 0 Antagonist: 0**



120-95-6 : 2,4-Bis(2-methylbutan-2-yl)phenol

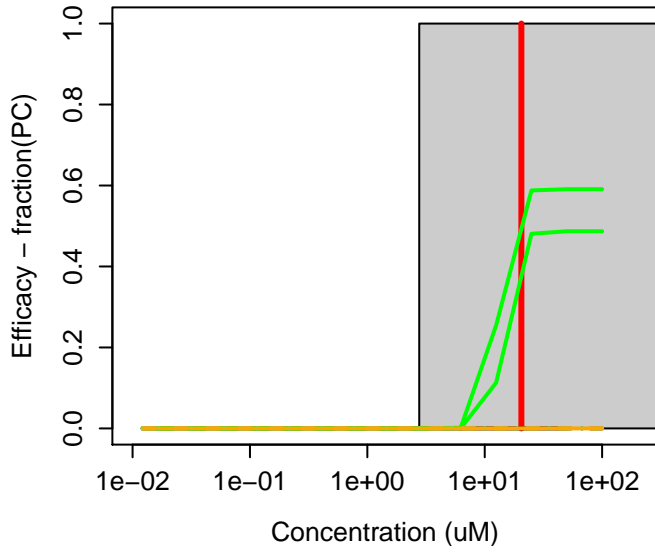

120-95-6 : 2,4-Bis(2-methylbutan-2-yl)phenol  
Agonist: 0 Antagonist: 0

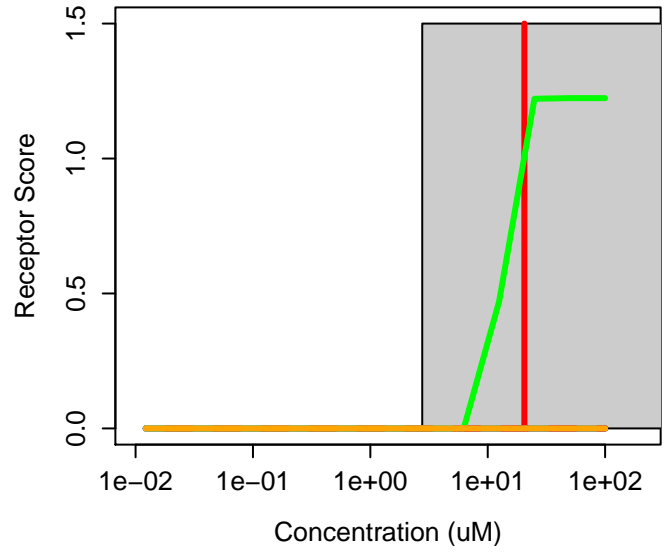

121-00-6 : 2-tert-Butyl-4-methoxyphenol

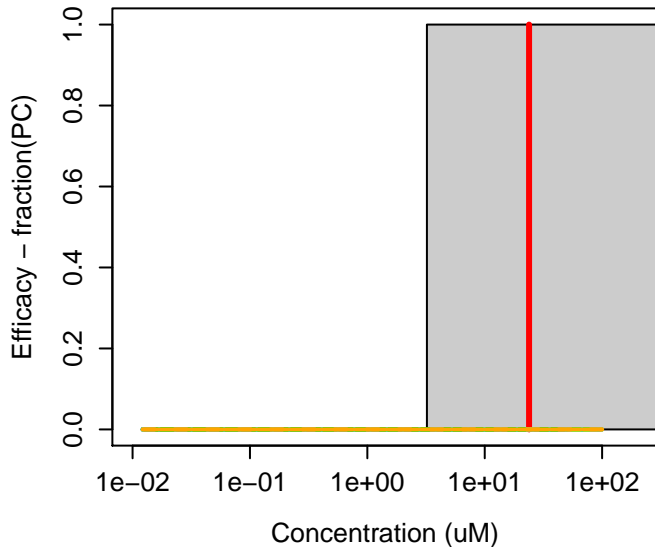

121-00-6 : 2-tert-Butyl-4-methoxyphenol  
Agonist: 0 Antagonist: 0

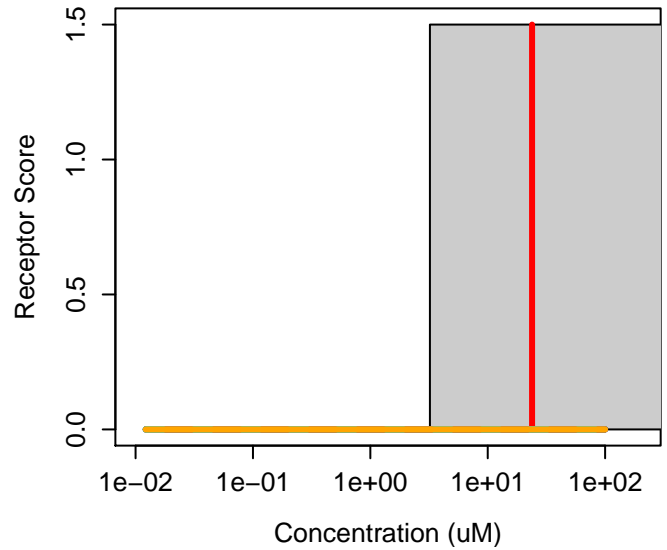

2108-13-3 : (Methylcyclopentadienyl)tricarbonylman2108-13-3 : (Methylcyclopentadienyl)tricarbonylman  
Agonist: 0 Antagonist: 0





121-14-2 : 2,4-Dinitrotoluene



121-14-2 : 2,4-Dinitrotoluene  
Agonist: 0 Antagonist: 0



121-32-4 : 3-Ethoxy-4-hydroxybenzaldehyde

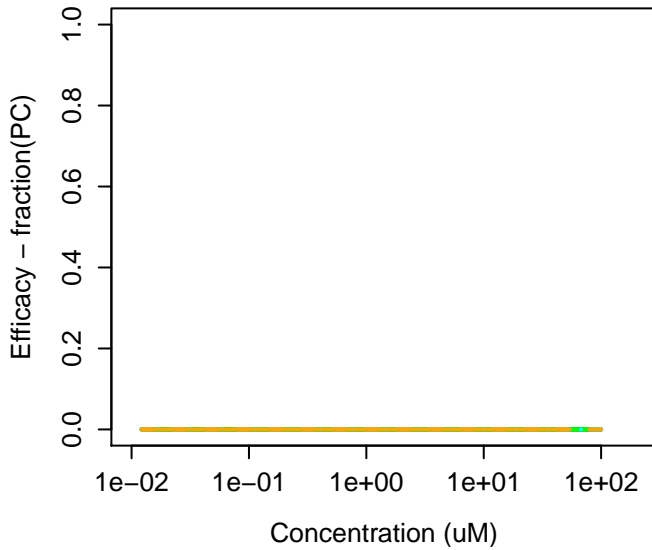

121-32-4 : 3-Ethoxy-4-hydroxybenzaldehyde  
Agonist: 0 Antagonist: 0



121-33-5 : 4-Hydroxy-3-methoxybenzaldehyde

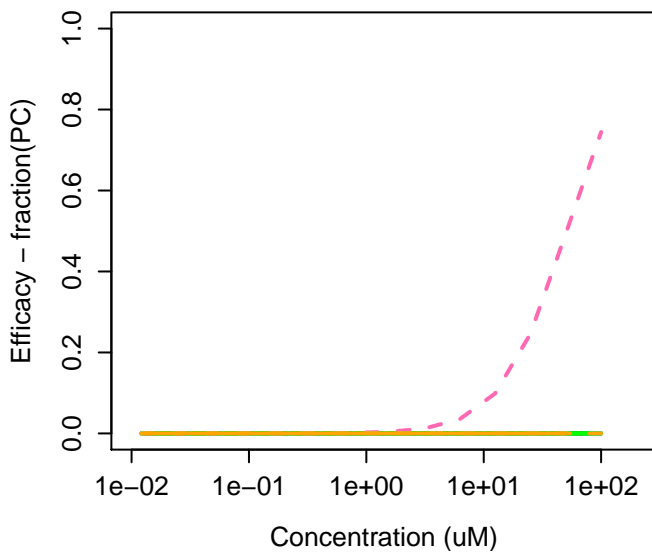

121-33-5 : 4-Hydroxy-3-methoxybenzaldehyde  
Agonist: 0 Antagonist: 0

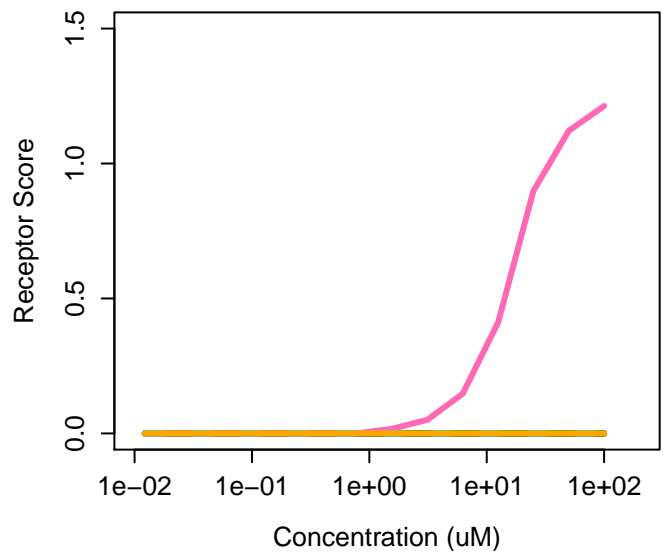

**121-39-1 : Ethyl 3-phenylglycidate**



**121-39-1 : Ethyl 3-phenylglycidate**  
**Agonist: 0 Antagonist: 0**



**1214-39-7 : N-Benzyladenine**

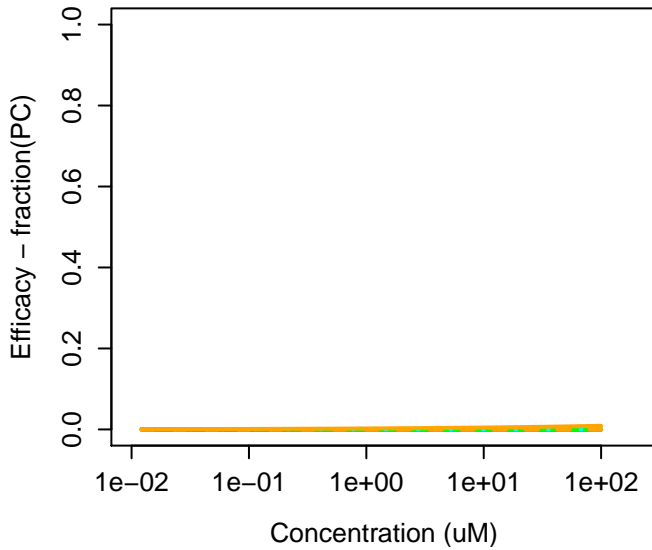

**1214-39-7 : N-Benzyladenine**  
**Agonist: 0 Antagonist: 0**

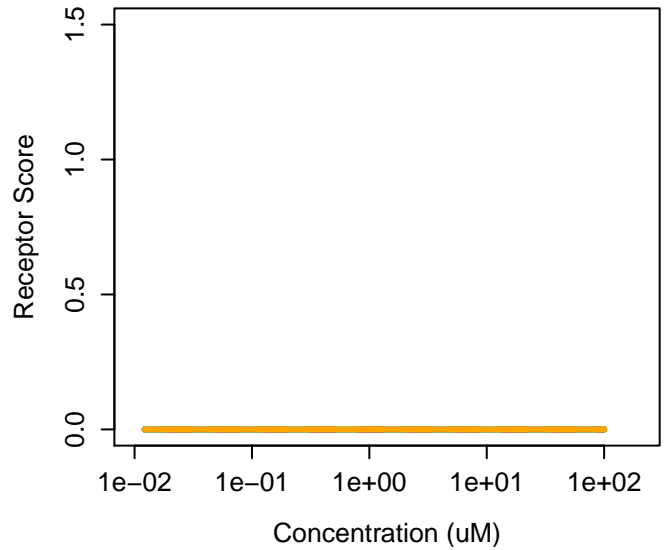

**121552-61-2 : Cyprodinil**

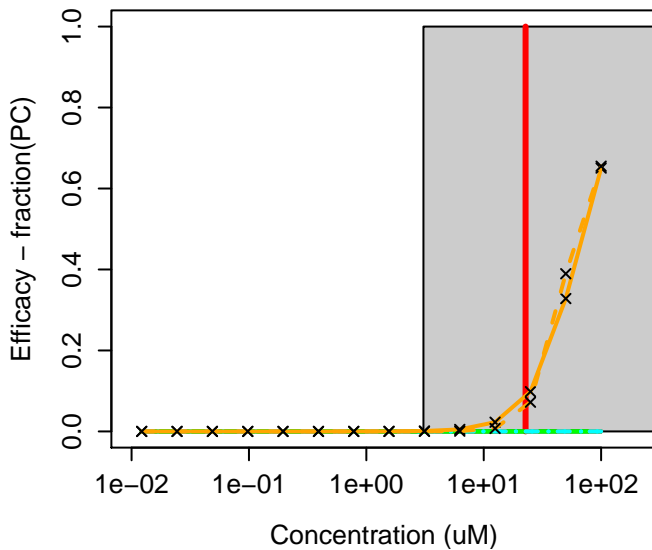

**121552-61-2 : Cyprodinil**  
**Agonist: 0 Antagonist: 0**

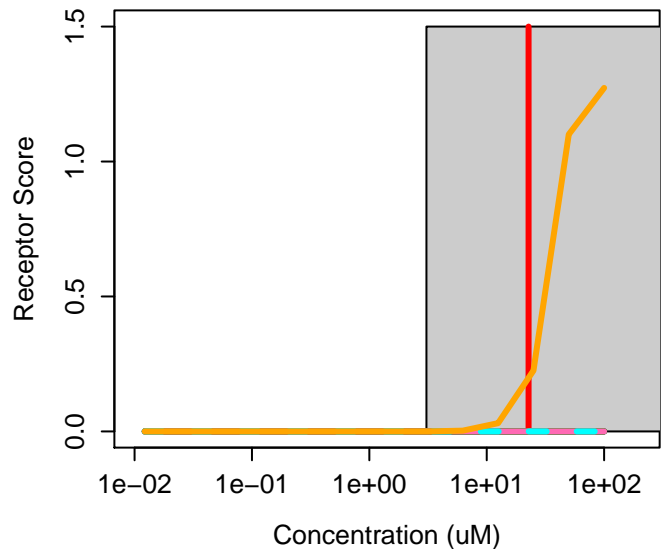

121-69-7 : N,N-Dimethylaniline



121-69-7 : N,N-Dimethylaniline  
Agonist: 0 Antagonist: 0



121-75-5 : Malathion

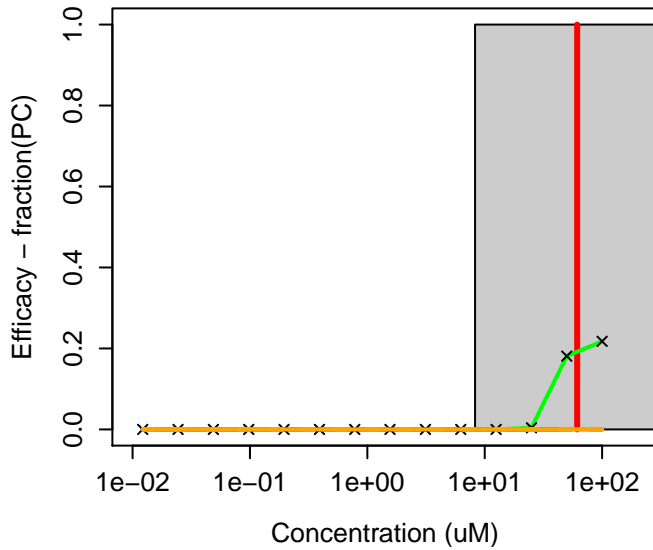

121-75-5 : Malathion  
Agonist: 0 Antagonist: 0

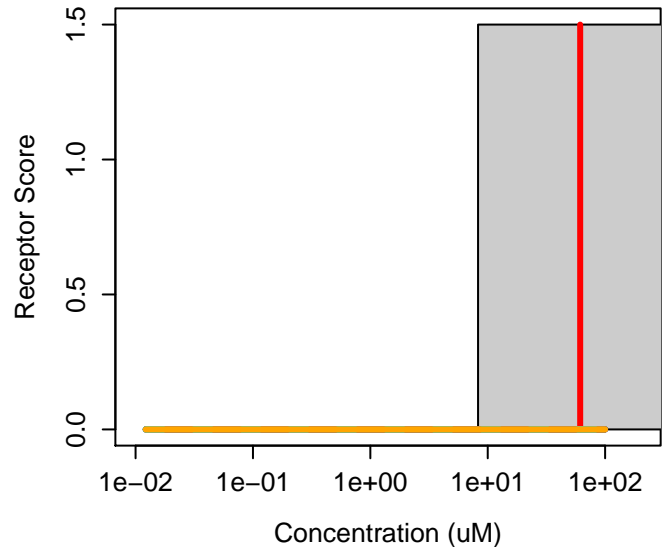

121-79-9 : Propyl gallate

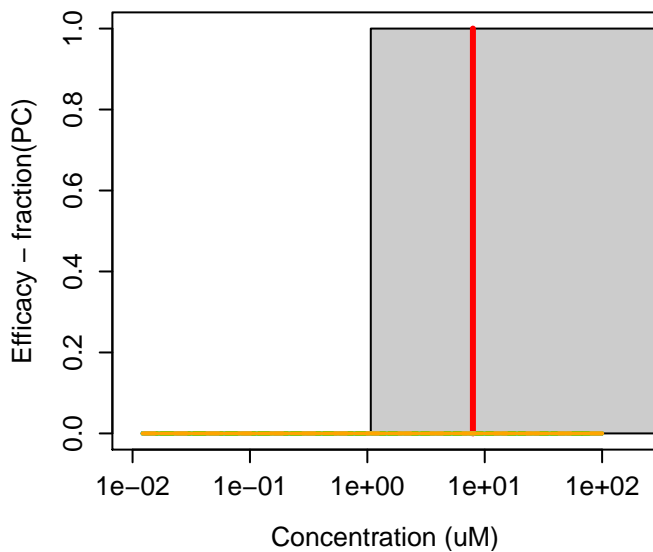

121-79-9 : Propyl gallate  
Agonist: 0 Antagonist: 0

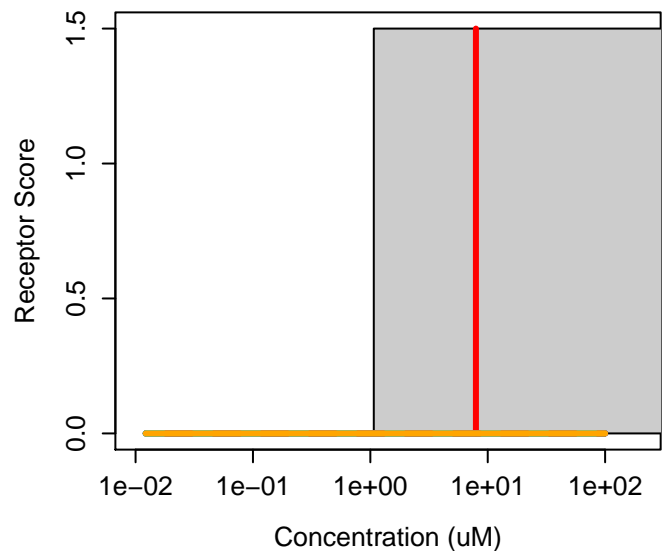

121-91-5 : 1,3-Benzenedicarboxylic acid



121-91-5 : 1,3-Benzenedicarboxylic acid  
Agonist: 0 Antagonist: 0



1219-38-1 : Octylparaben

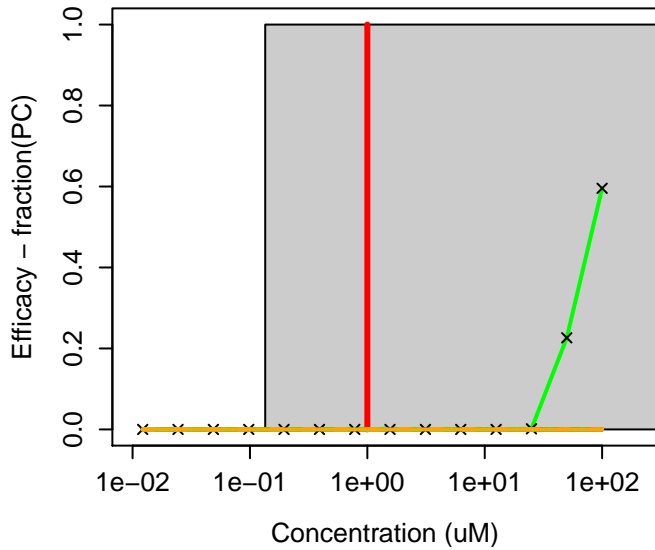

1219-38-1 : Octylparaben  
Agonist: 0 Antagonist: 0



122008-85-9 : Cyhalofop-butyl

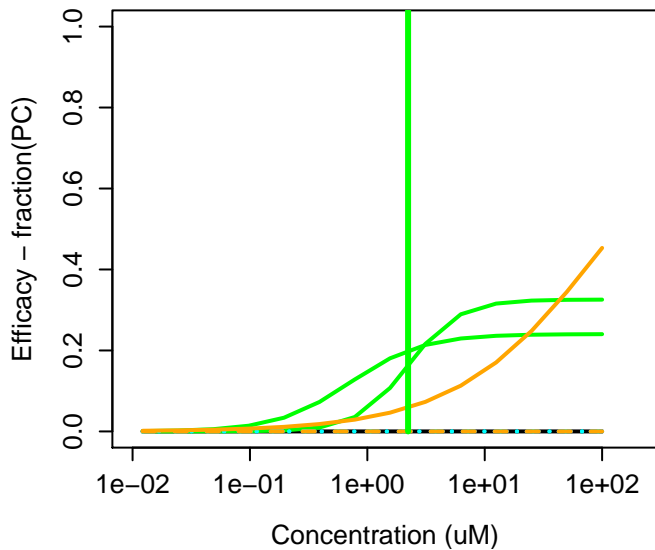

122008-85-9 : Cyhalofop-butyl  
Agonist: 0 Antagonist: 0.065

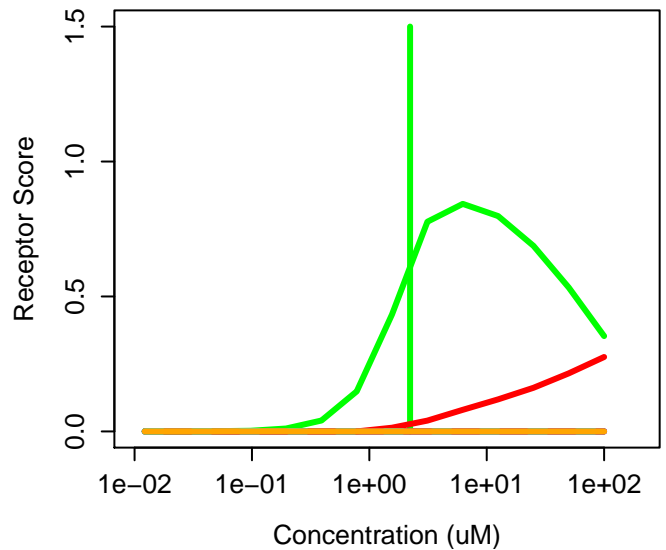

122-14-5 : Fenitrothion

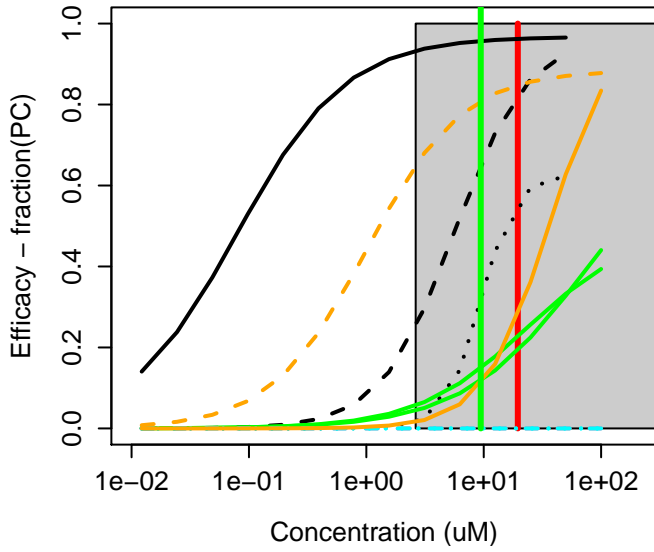

122-14-5 : Fenitrothion  
Agonist: 0 Antagonist: 0.63

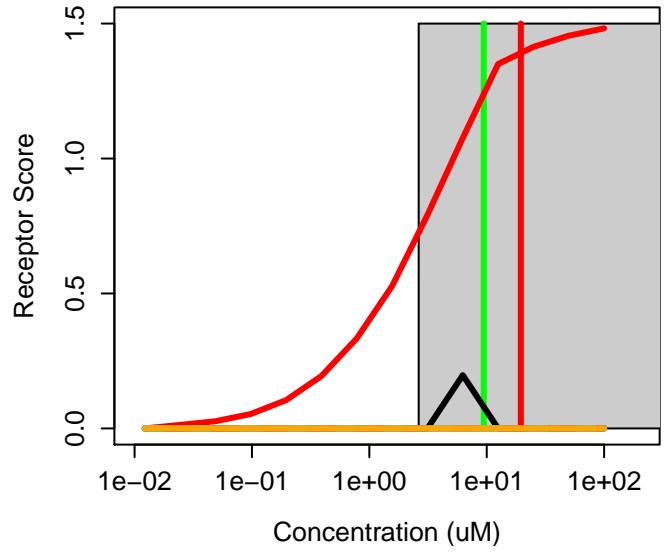

122-20-3 : Triisopropanolamine



122-20-3 : Triisopropanolamine  
Agonist: 0 Antagonist: 0



122-34-9 : Simazine

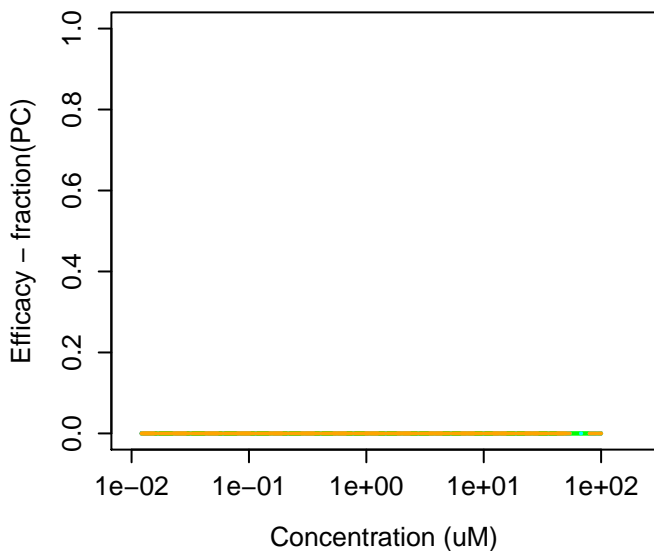

122-34-9 : Simazine  
Agonist: 0 Antagonist: 0



**122-39-4 : Diphenylamine**



**122-39-4 : Diphenylamine  
Agonist: 0 Antagonist: 0**



**122-40-7 : Pentylcinnamaldehyde**

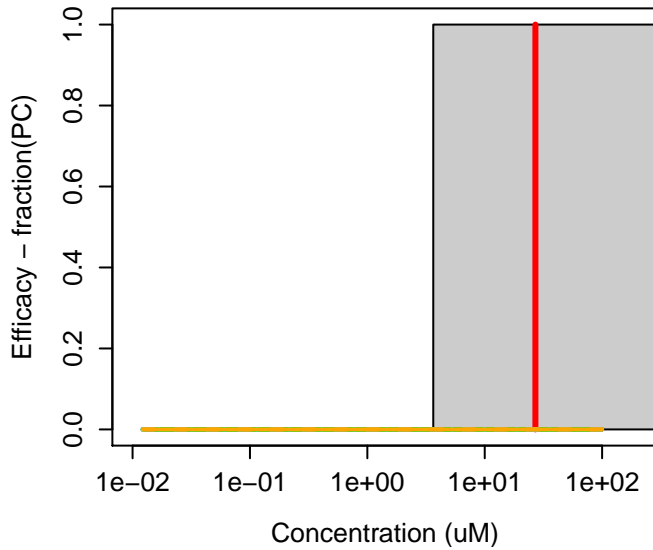

**122-40-7 : Pentylcinnamaldehyde  
Agonist: 0 Antagonist: 0**

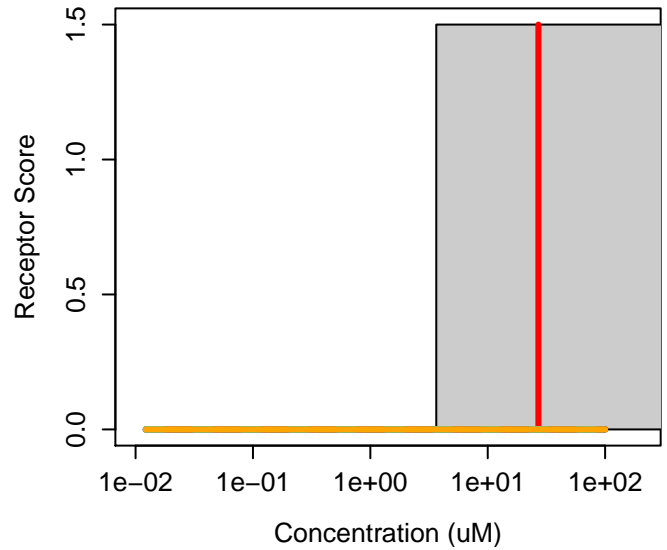

**122-42-9 : Propham**

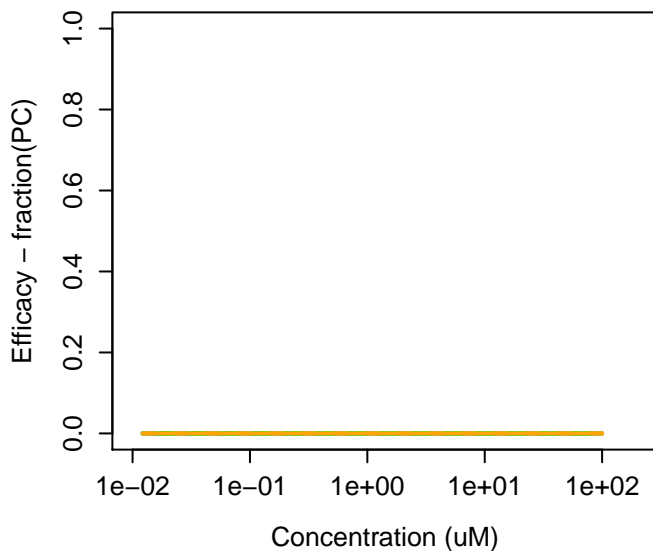

**122-42-9 : Propham  
Agonist: 0 Antagonist: 0**



122453-73-0 : Chlorfenapyr

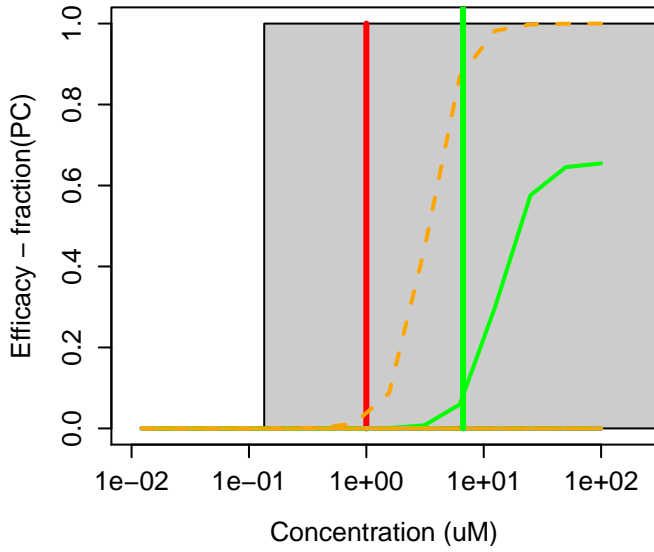

122453-73-0 : Chlorfenapyr  
Agonist: 0 Antagonist: 0.11

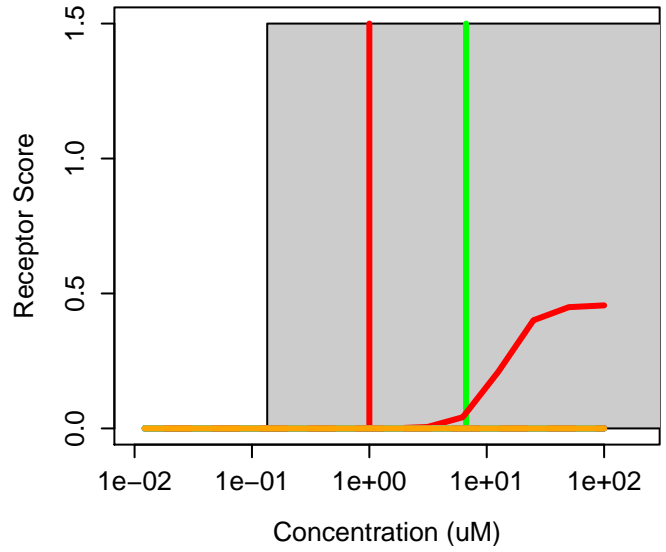

122-51-0 : Ethyl orthoformate



122-51-0 : Ethyl orthoformate  
Agonist: 0 Antagonist: 0



122-57-6 : Methyl styryl ketone

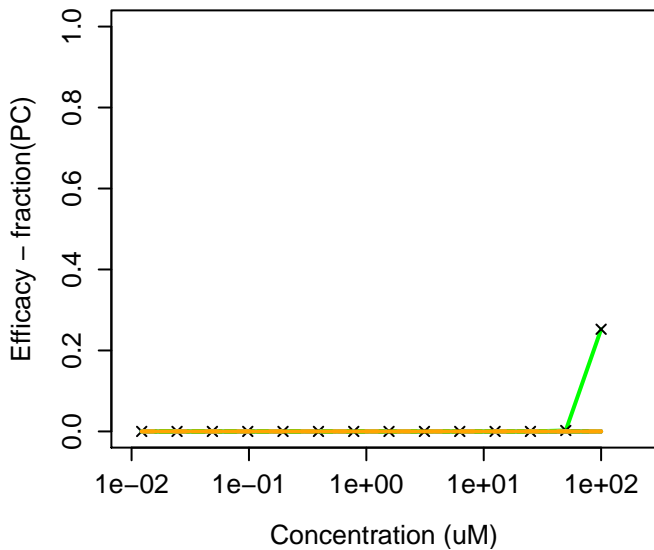

122-57-6 : Methyl styryl ketone  
Agonist: 0 Antagonist: 0

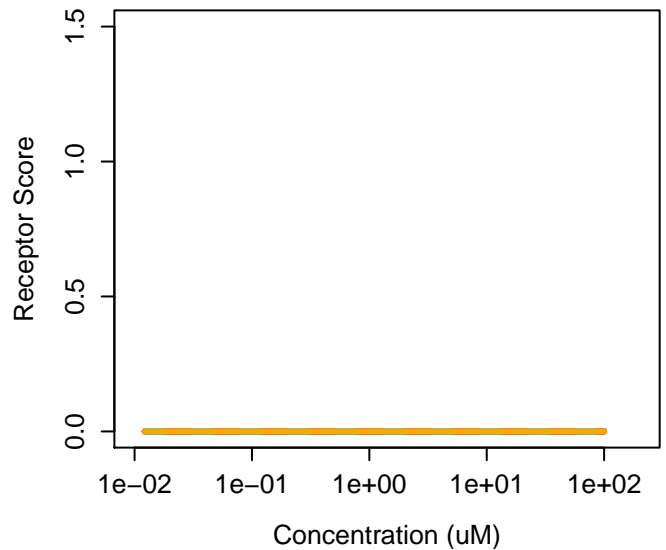

**122-62-3 : Bis(2-ethylhexyl) decanedioate**

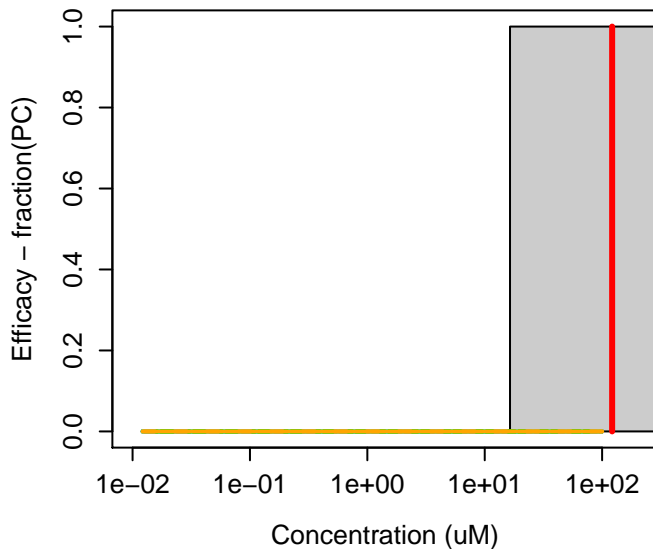

**122-62-3 : Bis(2-ethylhexyl) decanedioate  
Agonist: 0 Antagonist: 0**

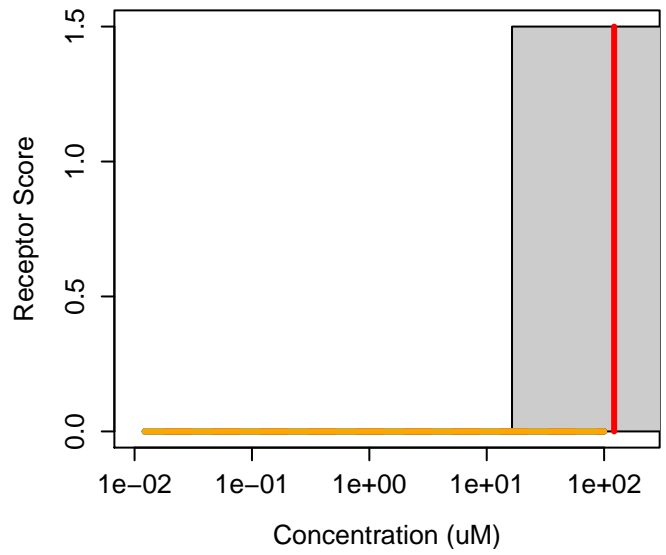

**122-66-7 : 1,2-Diphenylhydrazine**

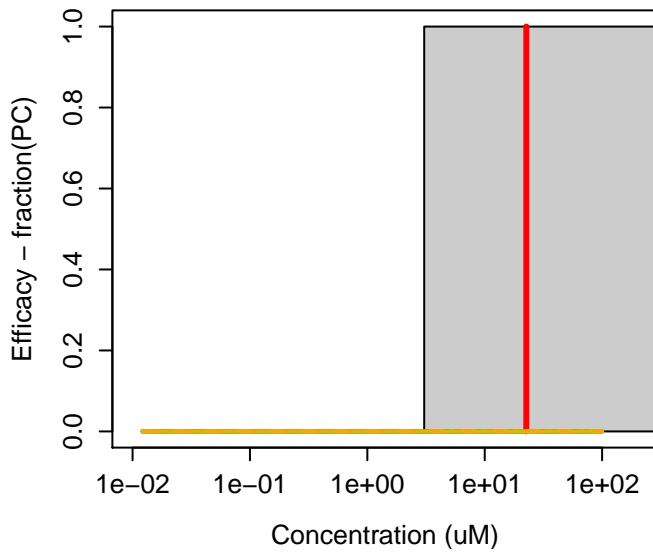

**122-66-7 : 1,2-Diphenylhydrazine  
Agonist: 0 Antagonist: 0**

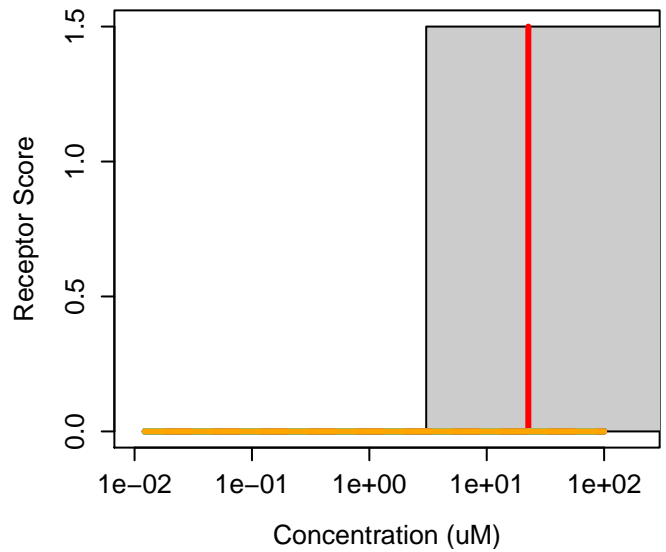

**122-78-1 : Phenylacetaldehyde**

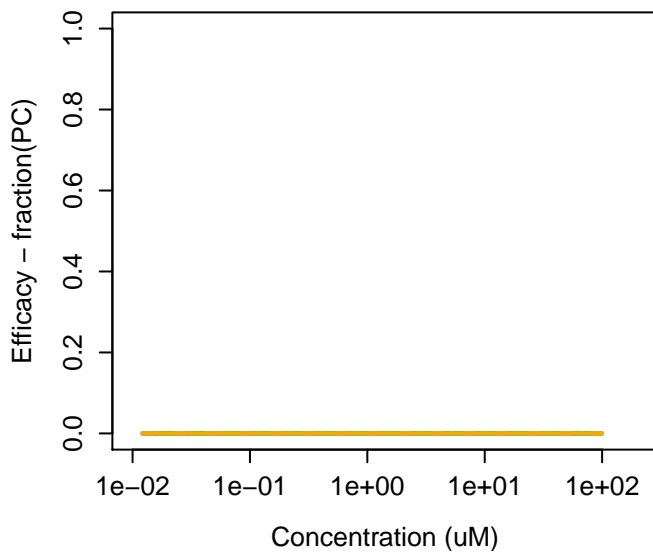

**122-78-1 : Phenylacetaldehyde  
Agonist: 0 Antagonist: 0**





**122836-35-5 : Sulfentrazone**



**122836-35-5 : Sulfentrazone  
Agonist: 0 Antagonist: 0**



**122-88-3 : 4-Chlorophenoxyacetic acid**



**122-88-3 : 4-Chlorophenoxyacetic acid  
Agonist: 0 Antagonist: 0**



**122-99-6 : 2-Phenoxyethanol**



**122-99-6 : 2-Phenoxyethanol  
Agonist: 0 Antagonist: 0**



**123-00-2 : 4-Morpholinepropanamine**



**123-00-2 : 4-Morpholinepropanamine  
Agonist: 0 Antagonist: 0**



**123-01-3 : Dodecylbenzene**



**123-01-3 : Dodecylbenzene  
Agonist: 0 Antagonist: 0**



**123-05-7 : 2-Ethylhexanal**



**123-05-7 : 2-Ethylhexanal  
Agonist: 0 Antagonist: 0**



**123-07-9 : 4-Ethylphenol**



**123-07-9 : 4-Ethylphenol  
Agonist: 0 Antagonist: 0**



**123-11-5 : 4-Methoxybenzaldehyde**



**123-11-5 : 4-Methoxybenzaldehyde  
Agonist: 0 Antagonist: 0**



**123122-55-4 : Candoxatriol**



**123122-55-4 : Candoxatriol  
Agonist: 0 Antagonist: 0**



**123-17-1 : 2,6,8-Trimethyl-4-nonanol**



**123-17-1 : 2,6,8-Trimethyl-4-nonanol  
Agonist: 0 Antagonist: 0**



**123-25-1 : Diethyl butanedioate**

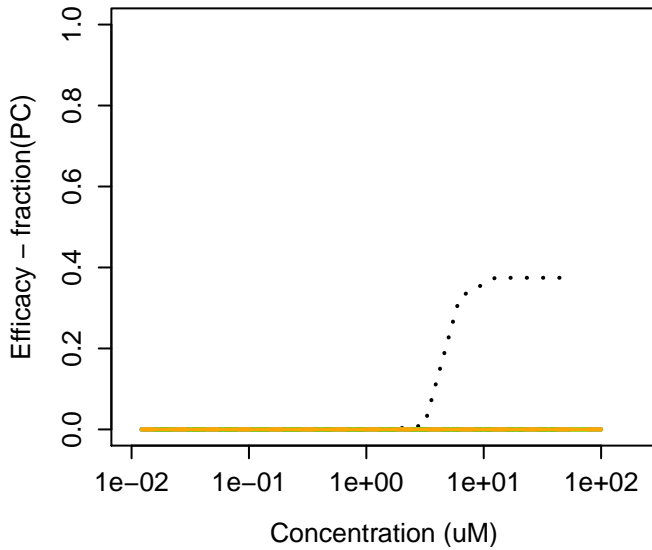

**123-25-1 : Diethyl butanedioate  
Agonist: 0 Antagonist: 0**



**123312-89-0 : Pymetrozine**



**123312-89-0 : Pymetrozine  
Agonist: 0 Antagonist: 0**



123-31-9 : Hydroquinone

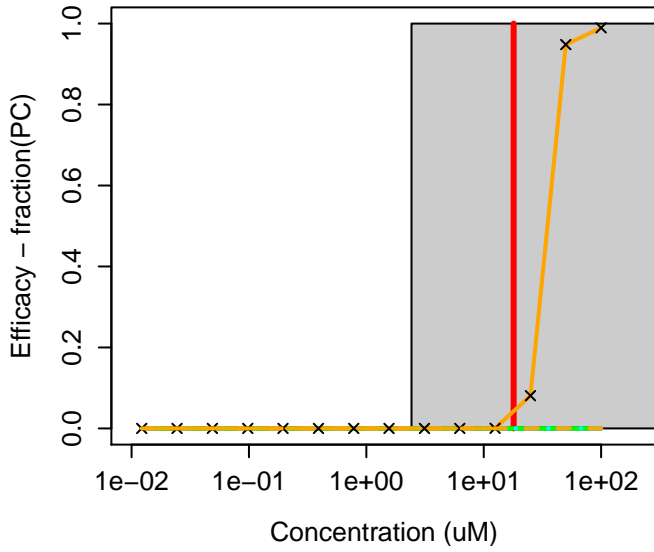

123-31-9 : Hydroquinone  
Agonist: 0 Antagonist: 0

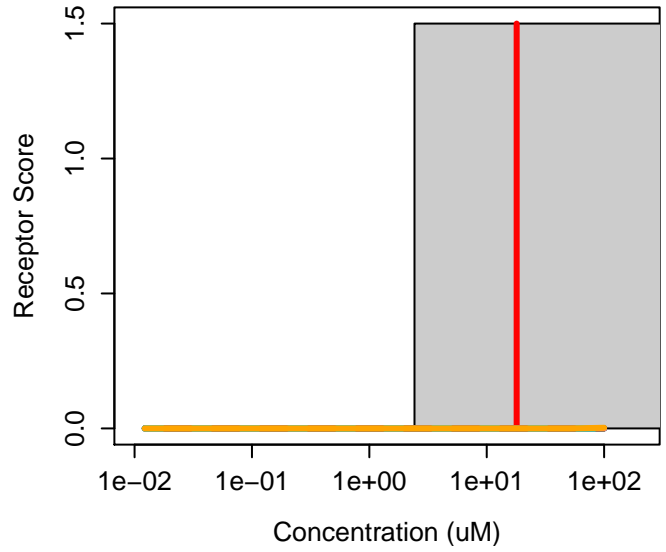

123-33-1 : Maleic hydrazide



123-33-1 : Maleic hydrazide  
Agonist: 0 Antagonist: 0



123343-16-8 : Pyrithiobac-sodium



123343-16-8 : Pyrithiobac-sodium  
Agonist: 0 Antagonist: 0



**123-35-3 : Myrcene**



**123-35-3 : Myrcene  
Agonist: 0 Antagonist: 0**



**123-42-2 : Diacetone alcohol**

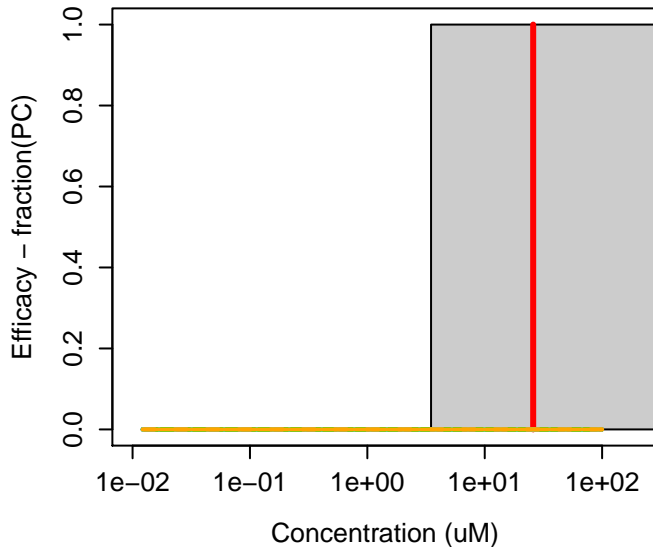

**123-42-2 : Diacetone alcohol  
Agonist: 0 Antagonist: 0**

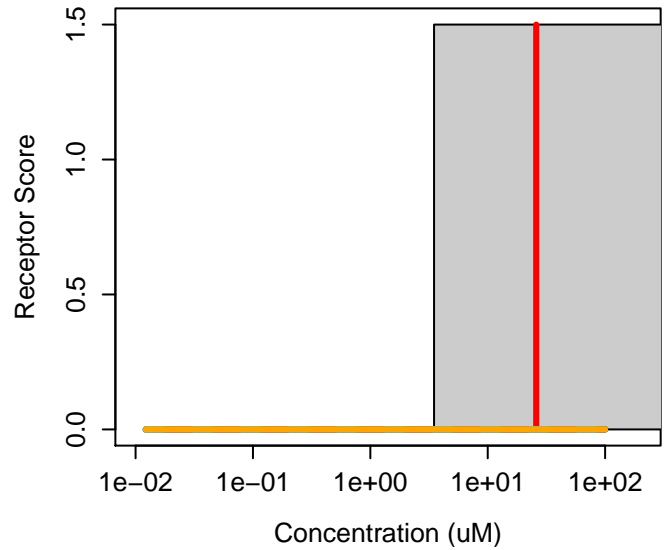

**123-51-3 : Isopentyl alcohol**



**123-51-3 : Isopentyl alcohol  
Agonist: 0 Antagonist: 0**



**123-66-0 : Ethyl hexanoate**



**123-66-0 : Ethyl hexanoate**  
**Agonist: 0 Antagonist: 0**



**123-77-3 : Azodicarbonamide**

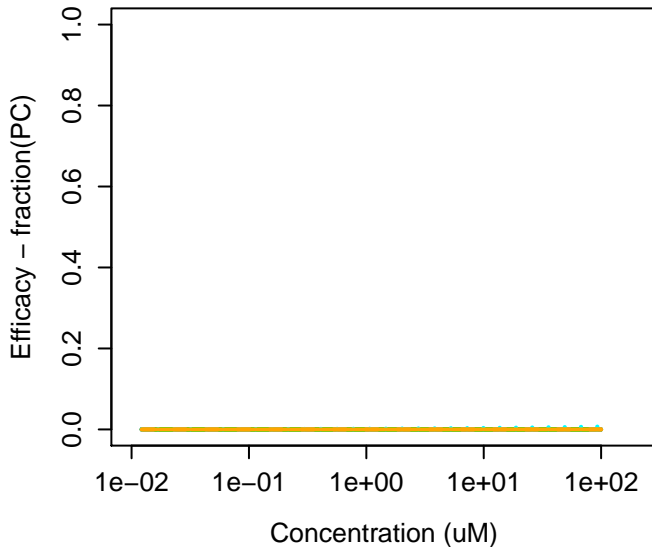

**123-77-3 : Azodicarbonamide**  
**Agonist: 0 Antagonist: 0**

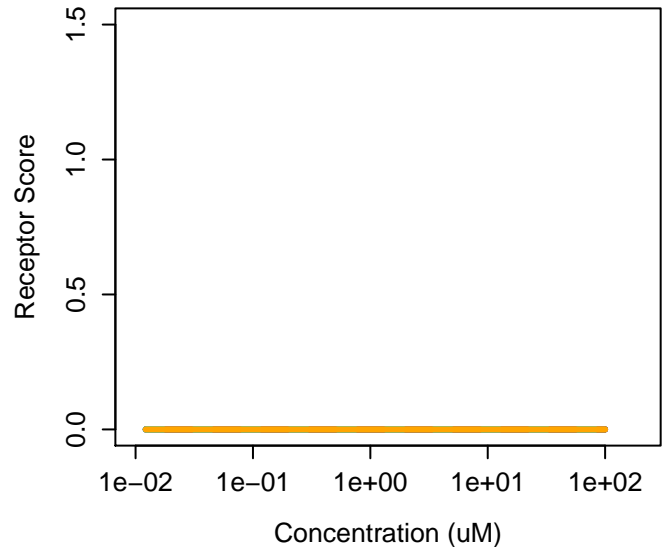

**123-92-2 : 3-Methylbutyl acetate**

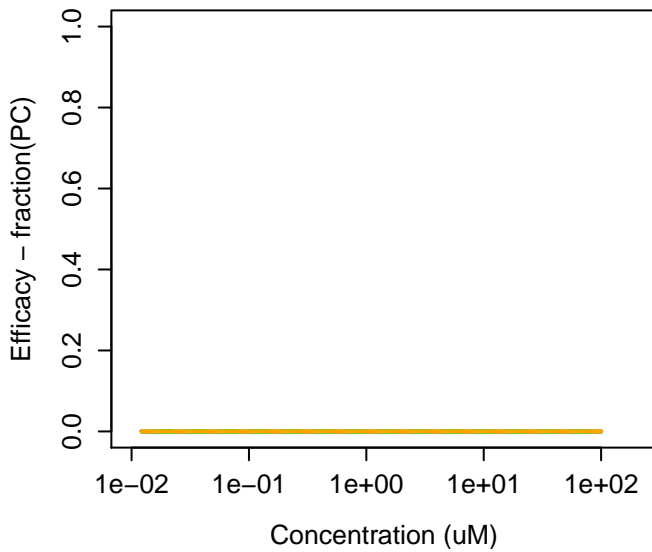

**123-92-2 : 3-Methylbutyl acetate**  
**Agonist: 0 Antagonist: 0**



**123-96-6 : 2-Octanol**



**123-96-6 : 2-Octanol  
Agonist: 0 Antagonist: 0**



**123-99-9 : Nonanedioic acid**

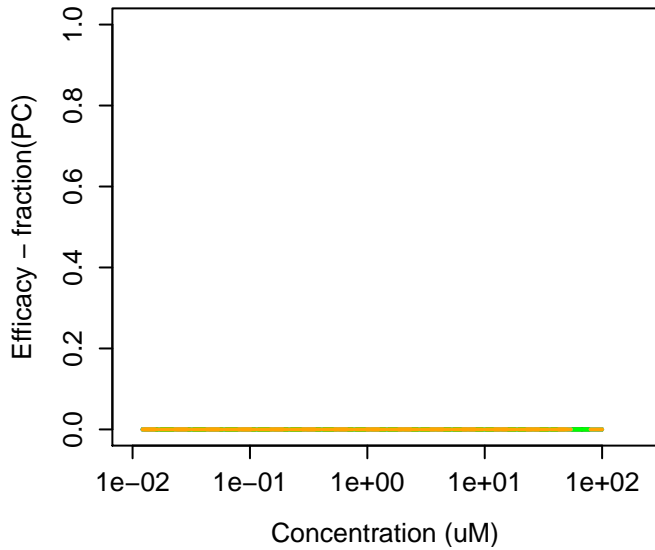

**123-99-9 : Nonanedioic acid  
Agonist: 0 Antagonist: 0**



**124-04-9 : Hexanedioic acid**

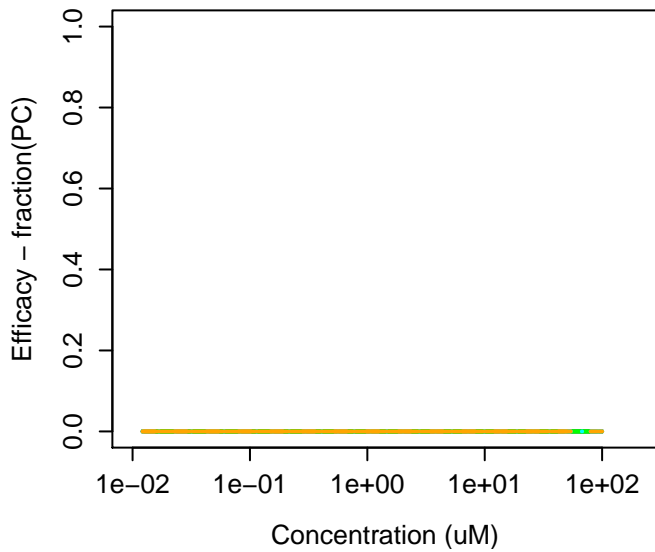

**124-04-9 : Hexanedioic acid  
Agonist: 0 Antagonist: 0**





124-07-2 : Octanoic acid

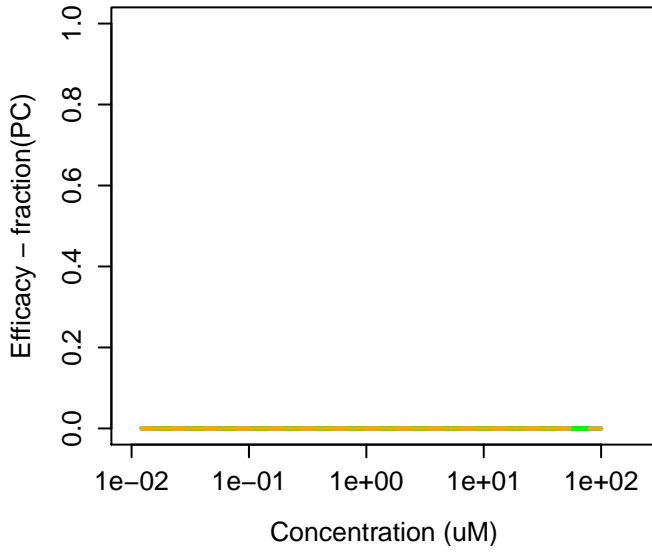

124-07-2 : Octanoic acid  
Agonist: 0 Antagonist: 0



124-09-4 : 1,6-Hexanediamine



124-09-4 : 1,6-Hexanediamine  
Agonist: 0 Antagonist: 0



124-13-0 : Octanal



124-13-0 : Octanal  
Agonist: 0 Antagonist: 0



124-18-5 : Decane



124-18-5 : Decane  
Agonist: 0 Antagonist: 0



1241-94-7 : 2-Ethylhexyl diphenyl phosphate

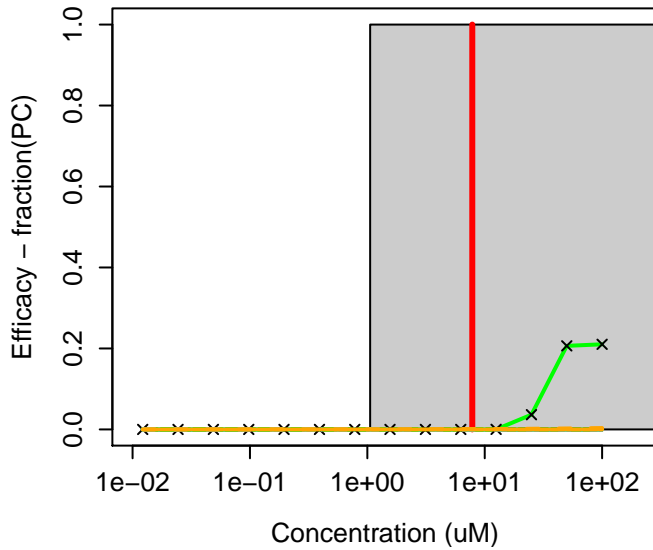

1241-94-7 : 2-Ethylhexyl diphenyl phosphate  
Agonist: 0 Antagonist: 0.00013

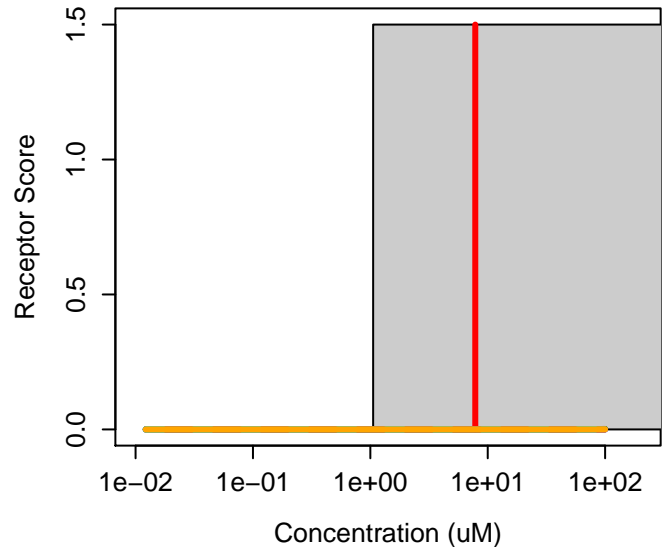

124-19-6 : Nonanal



124-19-6 : Nonanal  
Agonist: 0 Antagonist: 0



124-22-1 : 1-Dodecanamine

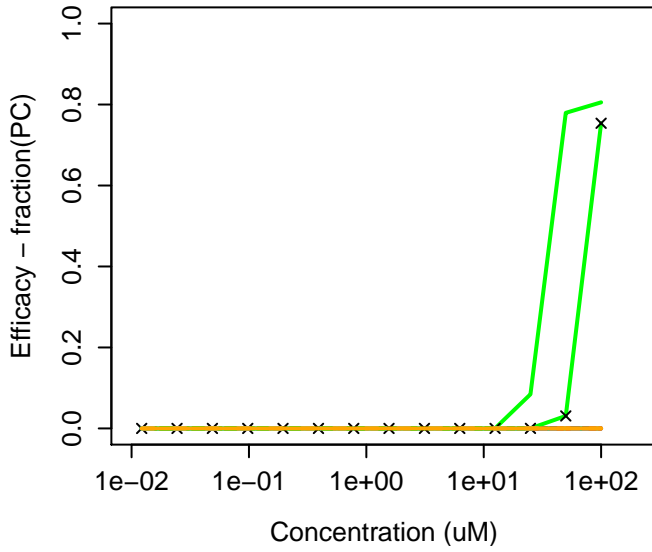

124-22-1 : 1-Dodecanamine  
Agonist: 0.00015 Antagonist: 0

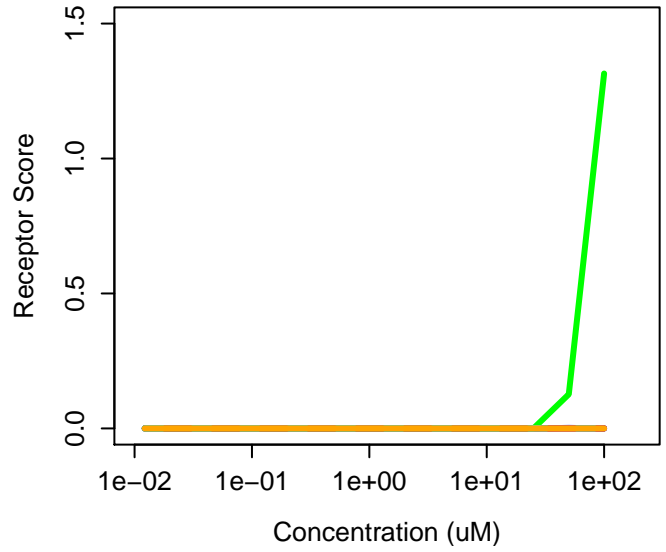

12427-38-2 : Maneb

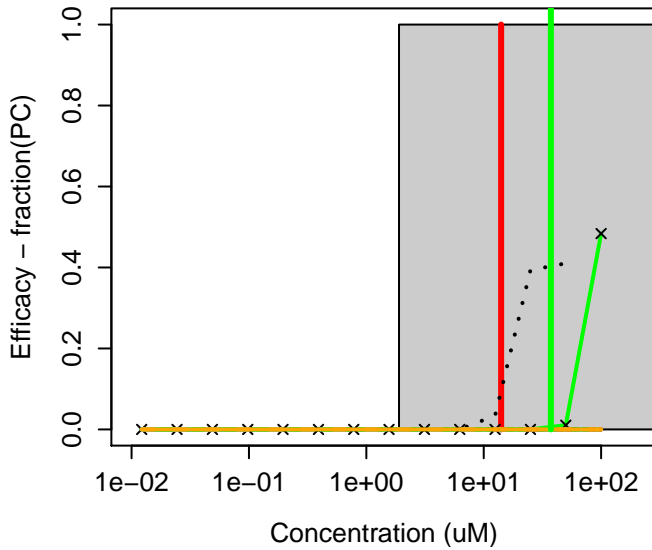

12427-38-2 : Maneb  
Agonist: 0.0067 Antagonist: 0.013

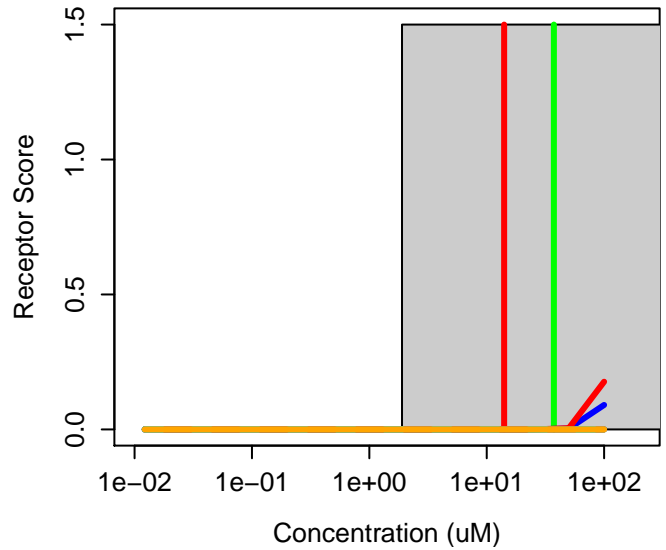

124378-77-4 : Enadoline

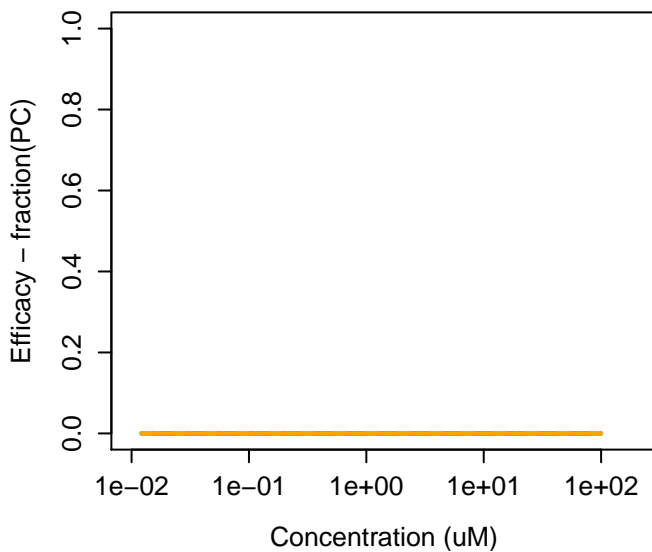

124378-77-4 : Enadoline  
Agonist: 0 Antagonist: 0



**124-40-3 : Dimethylamine**



**124-40-3 : Dimethylamine  
Agonist: 0 Antagonist: 0**



**124495-18-7 : Quinoxifen**

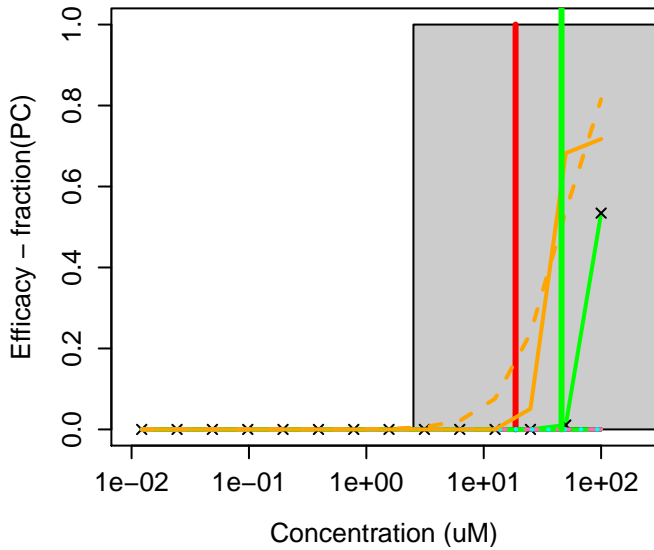

**124495-18-7 : Quinoxifen  
Agonist: 0 Antagonist: 0.033**

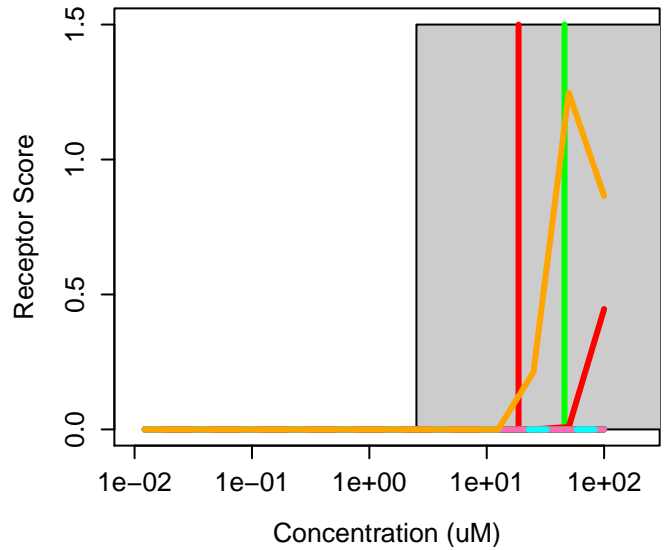

**124-68-5 : 2-Amino-2-methylpropan-1-ol**



**124-68-5 : 2-Amino-2-methylpropan-1-ol  
Agonist: 0 Antagonist: 0**



124-76-5 : Isoborneol



124-76-5 : Isoborneol  
Agonist: 0 Antagonist: 0



124-94-7 : Triamcinolone

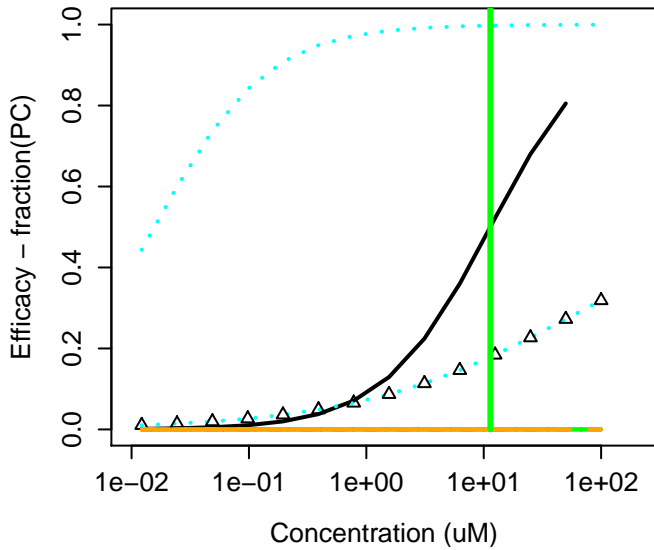

124-94-7 : Triamcinolone  
Agonist: 0.19 Antagonist: 0

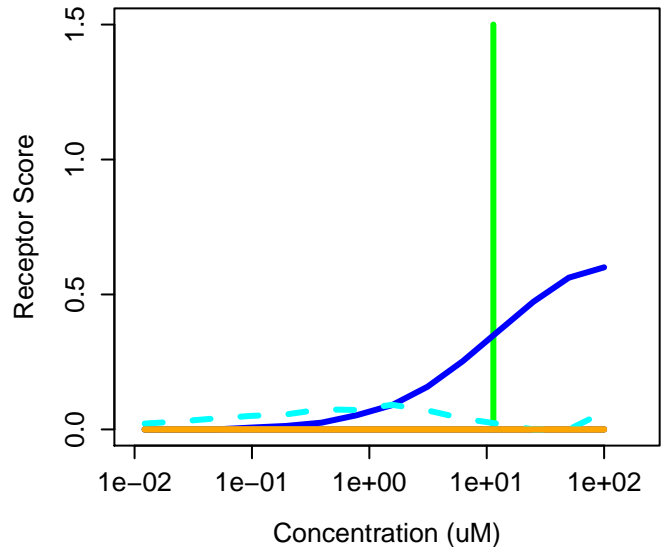

125116-23-6 : Metconazole

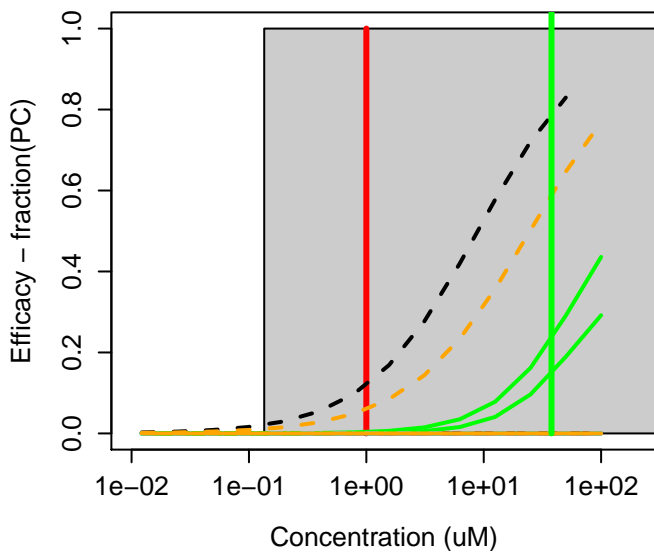

125116-23-6 : Metconazole  
Agonist: 0 Antagonist: 0.21

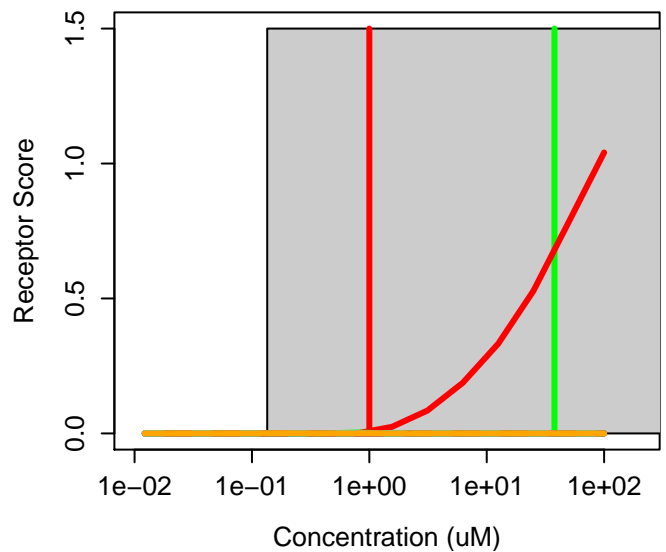

125-12-2 : Isobornyl acetate

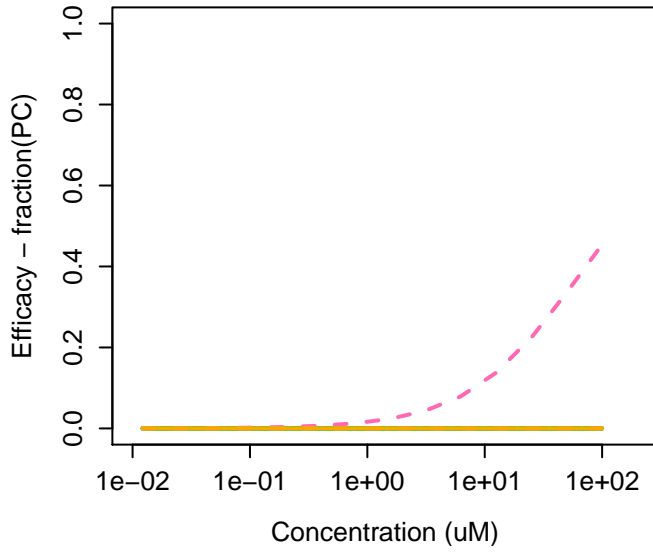

125-12-2 : Isobornyl acetate  
Agonist: 0 Antagonist: 0

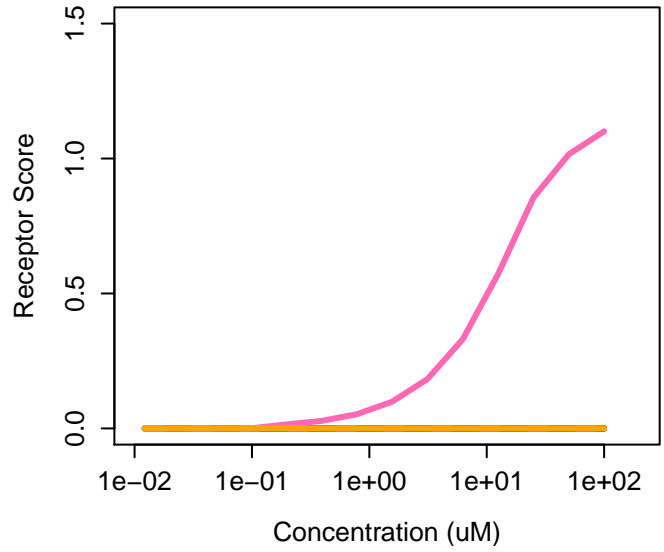

125225-28-7 : Ipconazole

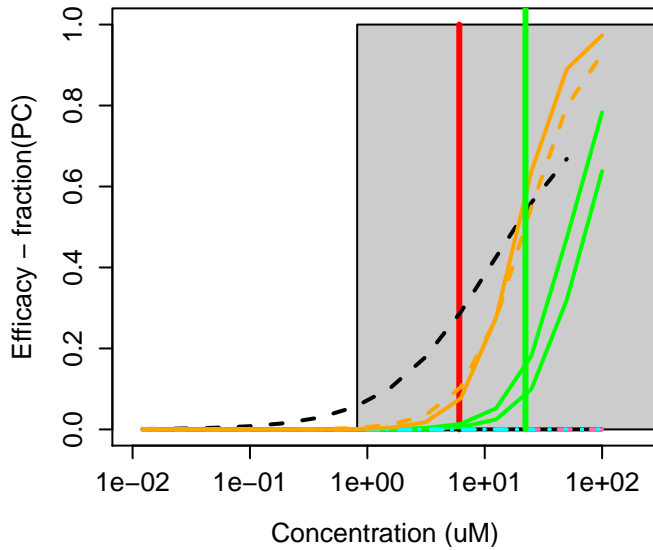

125225-28-7 : Ipconazole  
Agonist: 0 Antagonist: 0.27

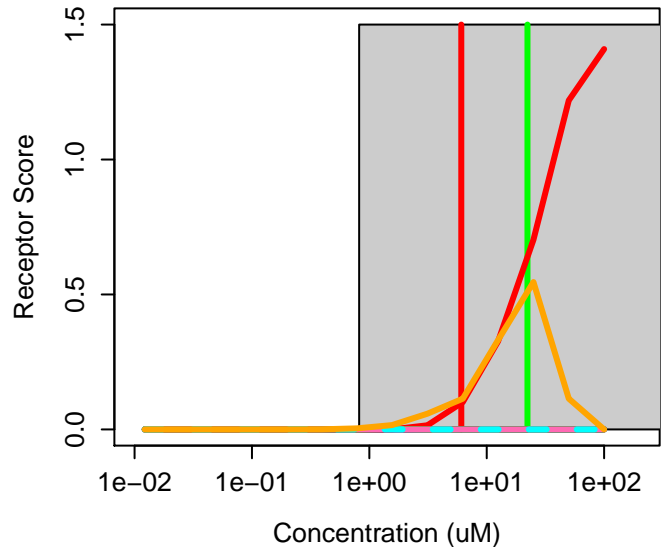

125401-92-5 : Bispyribac-sodium

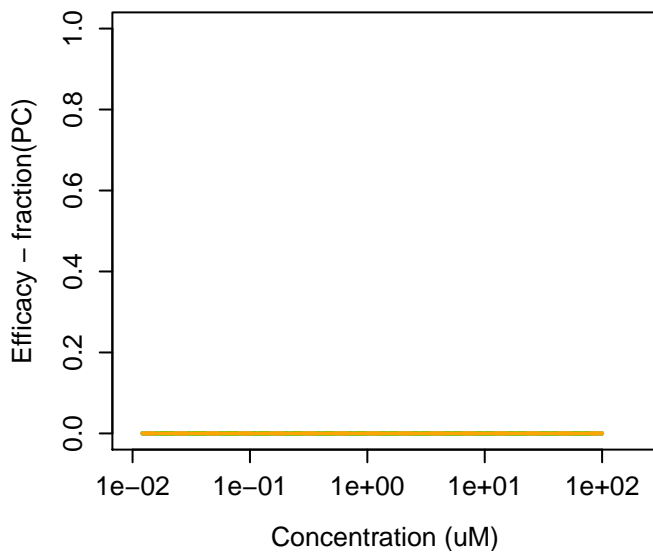

125401-92-5 : Bispyribac-sodium  
Agonist: 0 Antagonist: 0



**125-84-8 : Aminoglutethimide**



**125-84-8 : Aminoglutethimide  
Agonist: 0 Antagonist: 0**



**126-00-1 : Diphenolic acid**



**126-00-1 : Diphenolic acid  
Agonist: 0 Antagonist: 0**



**1260-17-9 : Carminic acid**

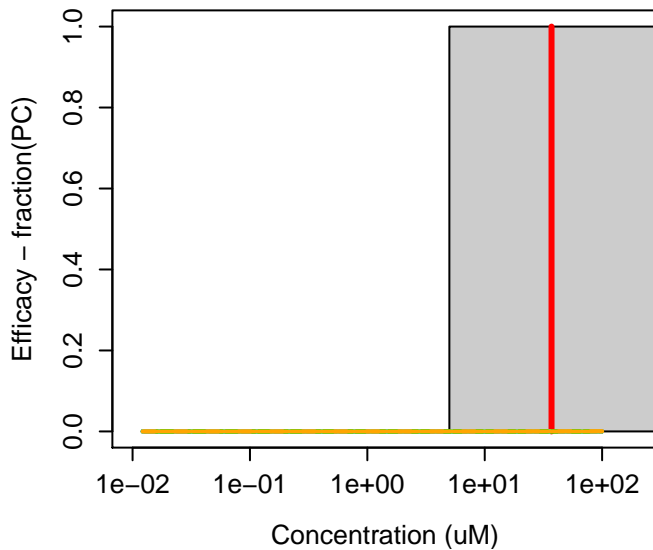

**1260-17-9 : Carminic acid  
Agonist: 0 Antagonist: 0**

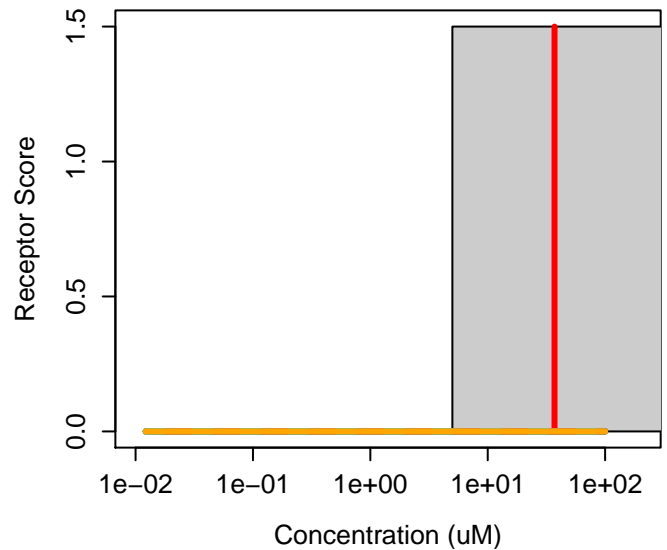

126-06-7 : 3-Bromo-1-chloro-5,5-dimethylhydant

126-06-7 : 3-Bromo-1-chloro-5,5-dimethylhydant  
Agonist: 0 Antagonist: 0



126-11-4 : 2-(Hydroxymethyl)-2-nitro-1,3-propane

126-11-4 : 2-(Hydroxymethyl)-2-nitro-1,3-propane  
Agonist: 0 Antagonist: 0

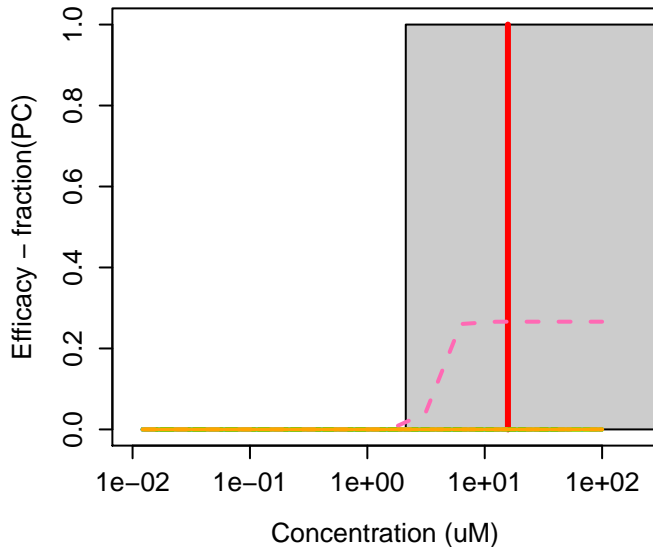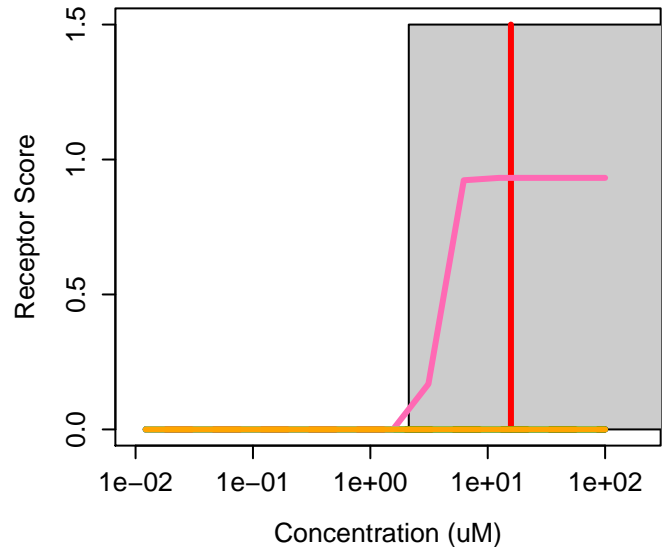

126-14-7 : Sucrose octaacetate

126-14-7 : Sucrose octaacetate  
Agonist: 0 Antagonist: 0

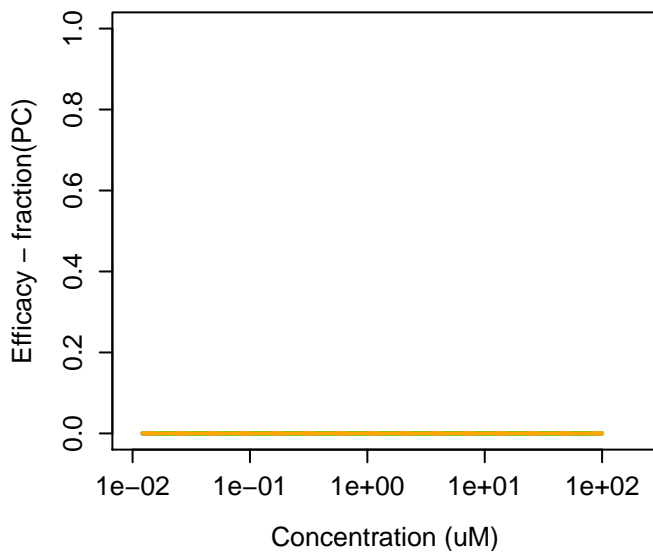



126-30-7 : 2,2-Dimethylpropane-1,3-diol

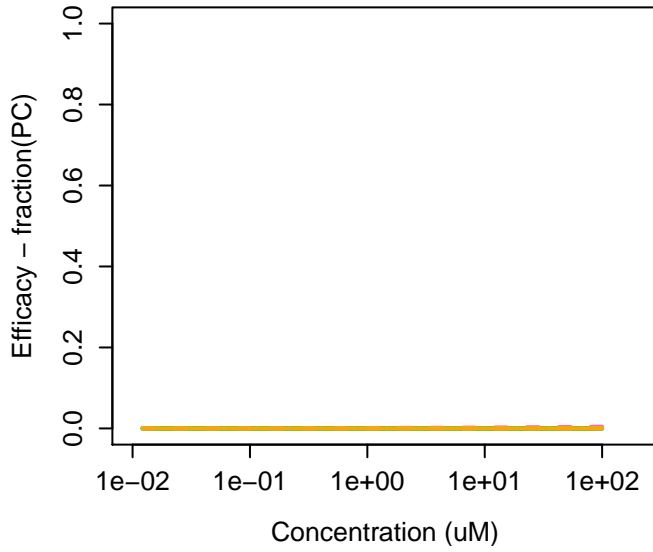

126-30-7 : 2,2-Dimethylpropane-1,3-diol  
Agonist: 0 Antagonist: 0

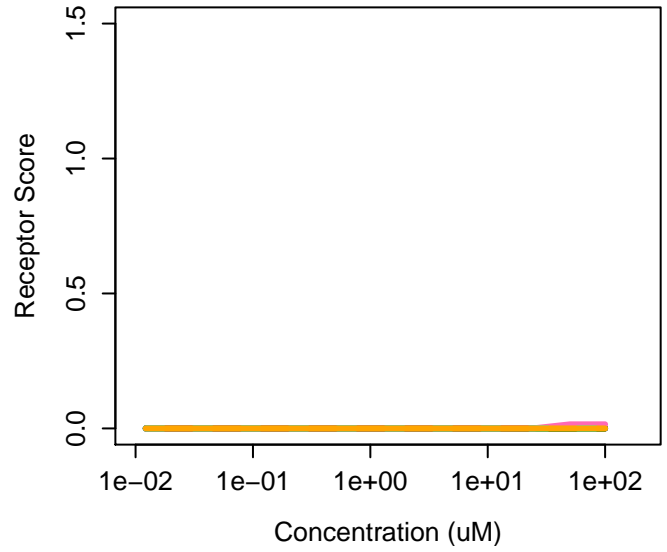

126-72-7 : Tris(2,3-dibromopropyl) phosphate

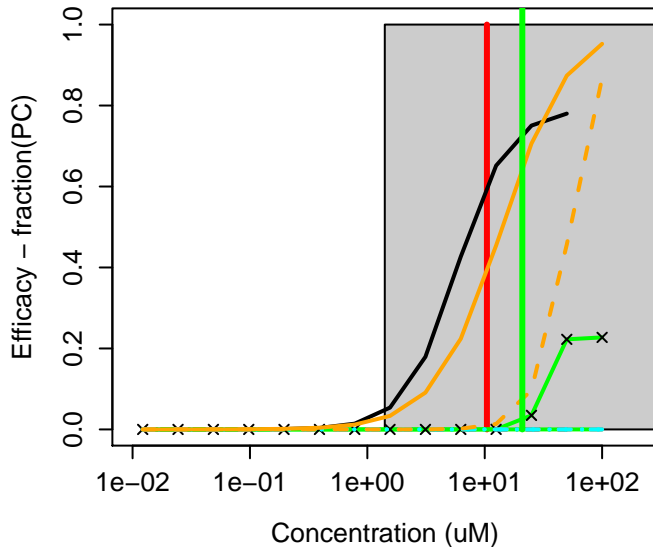

126-72-7 : Tris(2,3-dibromopropyl) phosphate  
Agonist: 0 Antagonist: 0.19

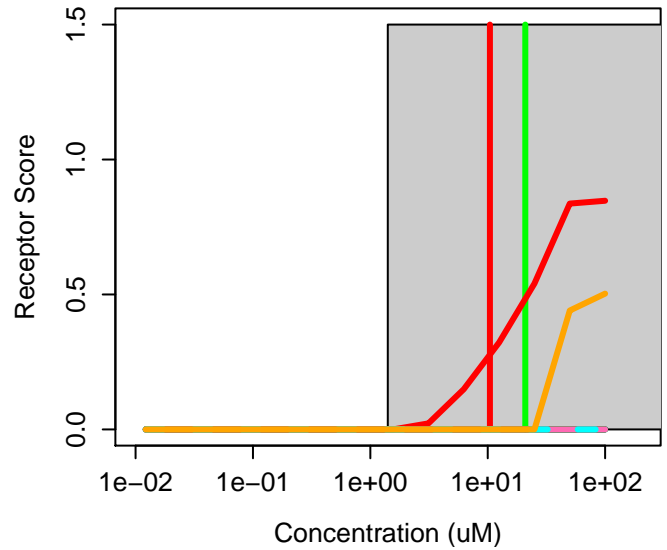

126-73-8 : Tributyl phosphate

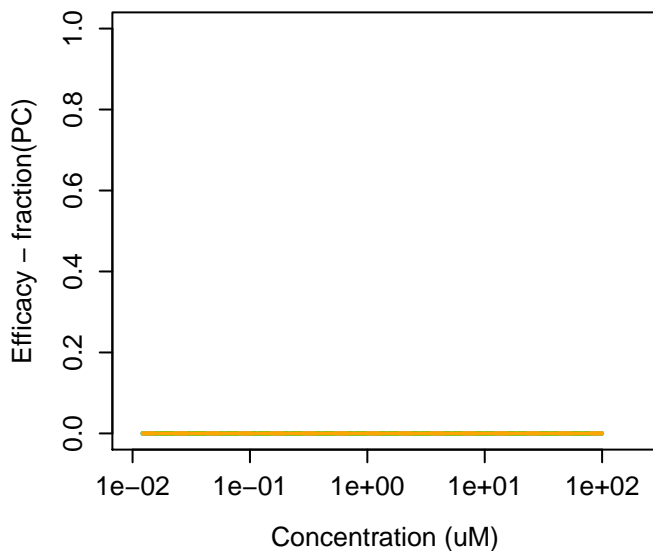

126-73-8 : Tributyl phosphate  
Agonist: 0 Antagonist: 0



126833-17-8 : Fenhexamid

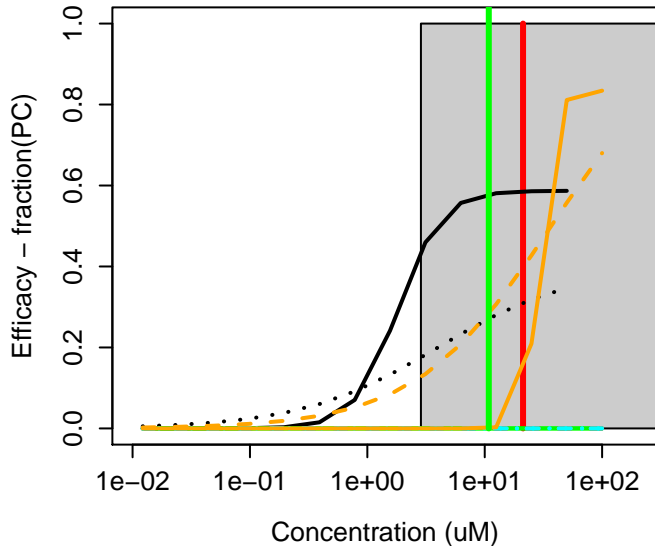

126833-17-8 : Fenhexamid  
Agonist: 0 Antagonist: 0.21

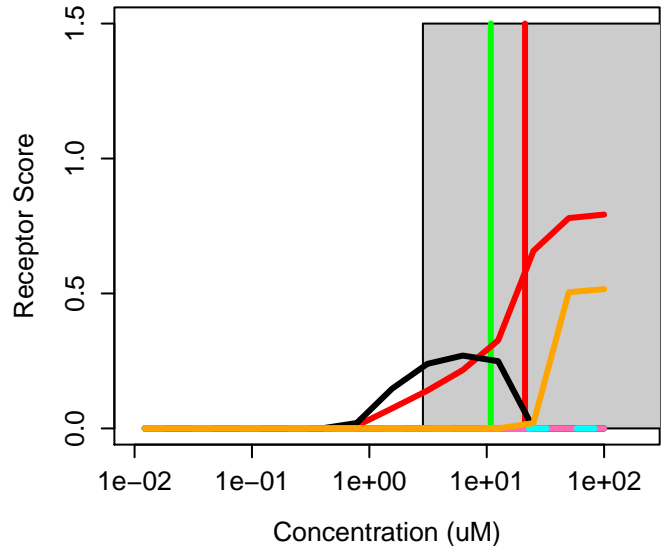

126-86-3 : 2,4,7,9-Tetramethyl-5-decyne-4,7-di



126-86-3 : 2,4,7,9-Tetramethyl-5-decyne-4,7-di  
Agonist: 0 Antagonist: 0



126-92-1 : Sodium ethasulfate

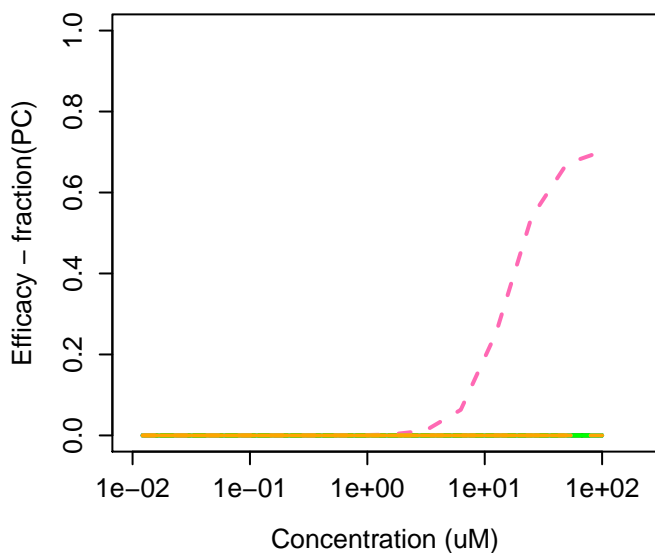

126-92-1 : Sodium ethasulfate  
Agonist: 6.5e-05 Antagonist: 0

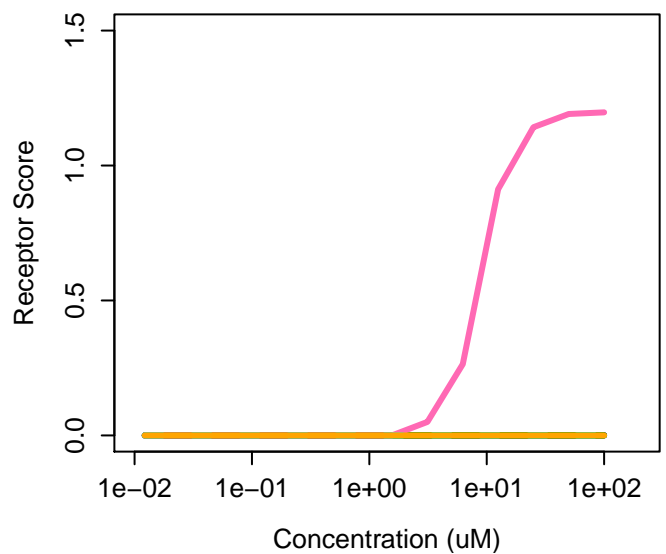

**126-98-7 : Methacrylonitrile**

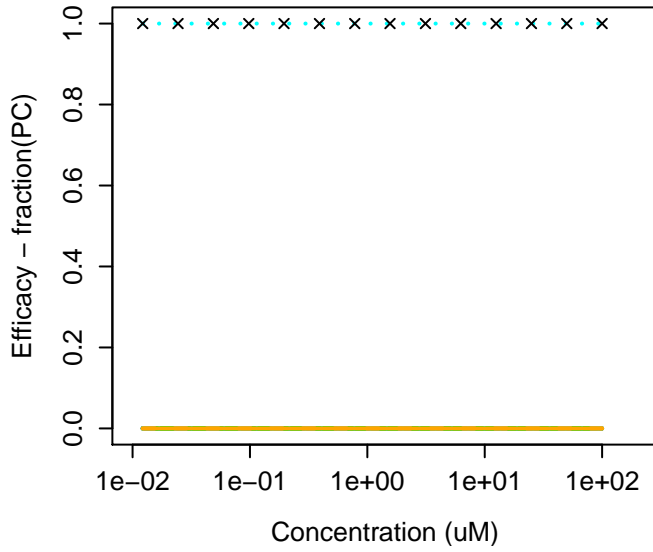

**126-98-7 : Methacrylonitrile  
Agonist: 0 Antagonist: 0**



**127-07-1 : Hydroxyurea**

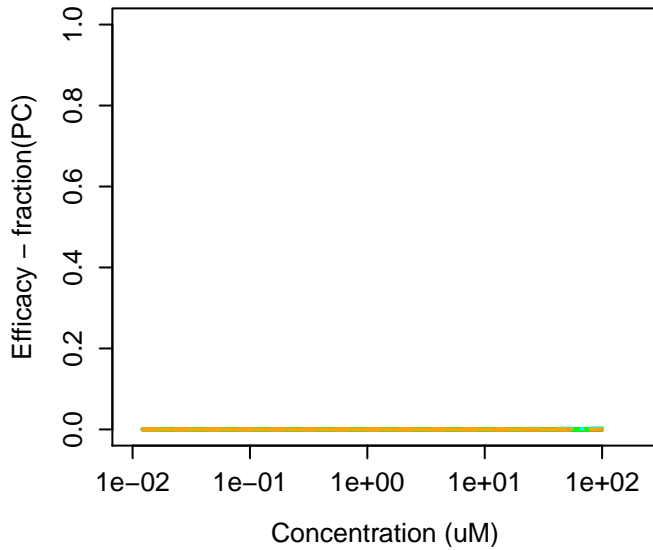

**127-07-1 : Hydroxyurea  
Agonist: 0 Antagonist: 0**

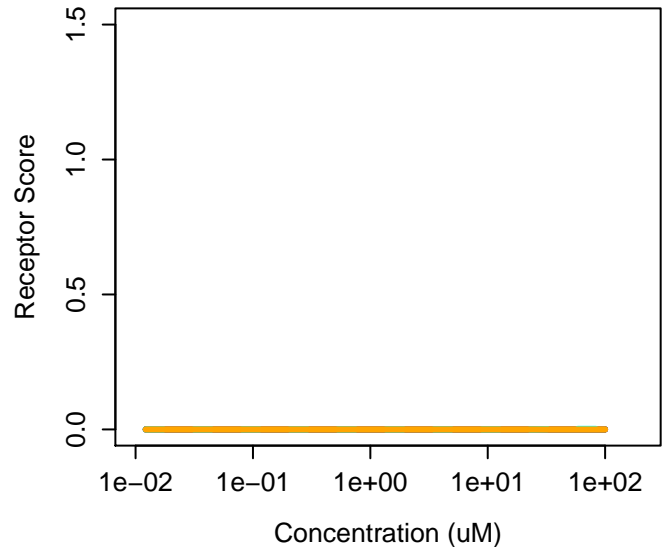

**127-19-5 : N,N-Dimethylacetamide**



**127-19-5 : N,N-Dimethylacetamide  
Agonist: 0 Antagonist: 0**



127-25-3 : Methyl abietate

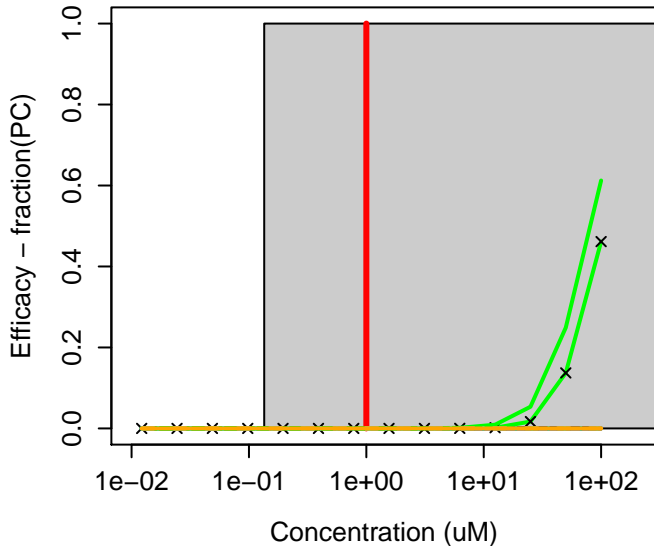

127-25-3 : Methyl abietate  
Agonist: 0 Antagonist: 0

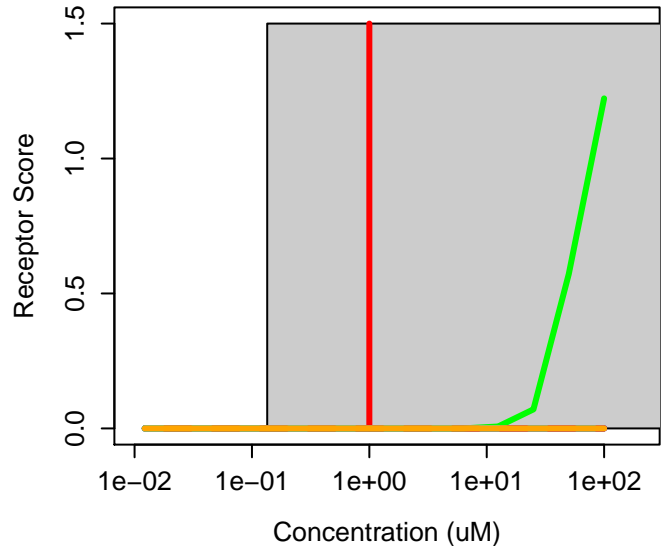

127308-82-1 : Zamifenacin

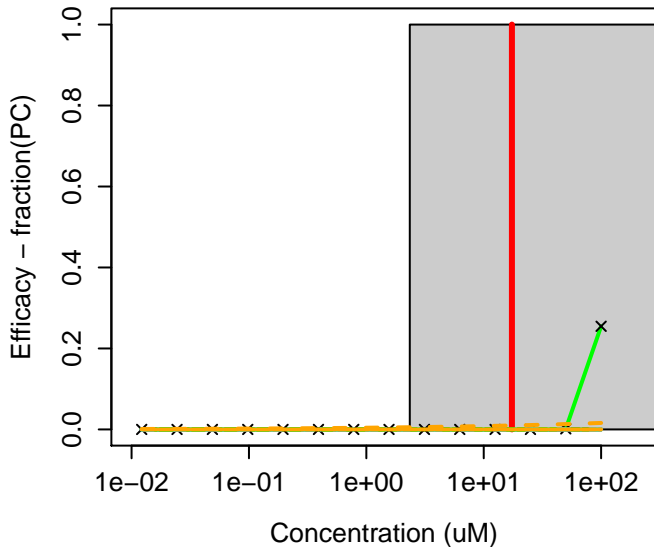

127308-82-1 : Zamifenacin  
Agonist: 0 Antagonist: 8e-04

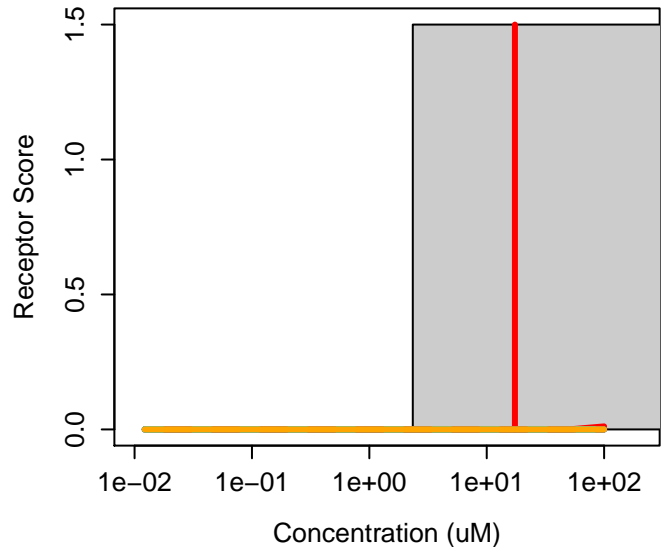

127-39-9 : Sodium 1,4-diisobutyl sulfosuccinate



127-39-9 : Sodium 1,4-diisobutyl sulfosuccinate  
Agonist: 0 Antagonist: 0



127-41-3 : alpha-Ionone



127-41-3 : alpha-Ionone  
Agonist: 0 Antagonist: 0



127-47-9 : Retinol acetate

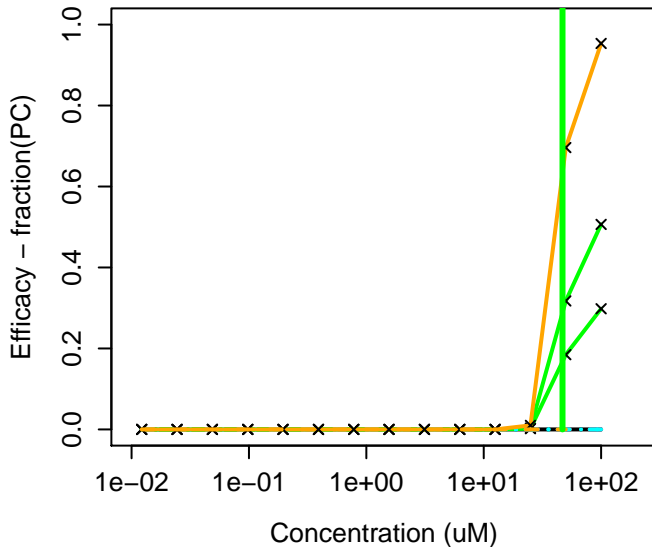

127-47-9 : Retinol acetate  
Agonist: 0 Antagonist: 0.065

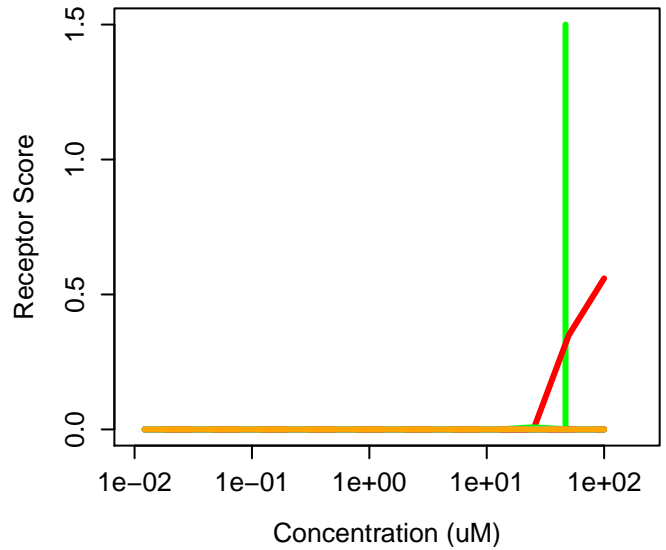

127-51-5 : alpha-Isomethylionone



127-51-5 : alpha-Isomethylionone  
Agonist: 0 Antagonist: 0



128-04-1 : Sodium dimethyldithiocarbamate

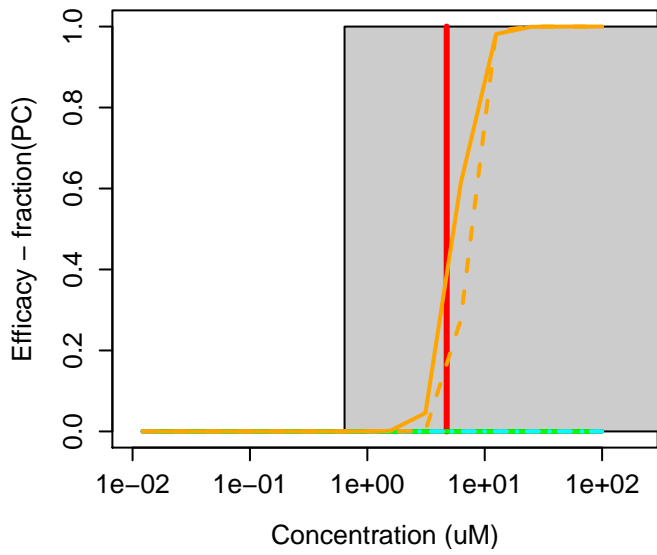

128-04-1 : Sodium dimethyldithiocarbamate  
Agonist: 0 Antagonist: 0

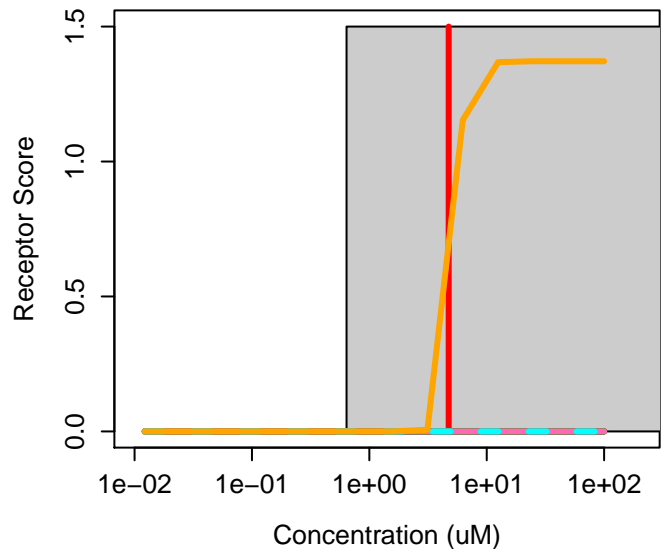

128-37-0 : Butylated hydroxytoluene

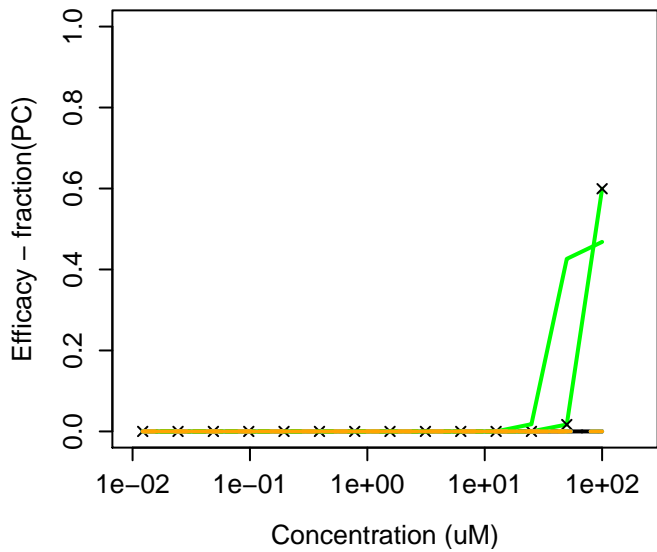

128-37-0 : Butylated hydroxytoluene  
Agonist: 0 Antagonist: 0

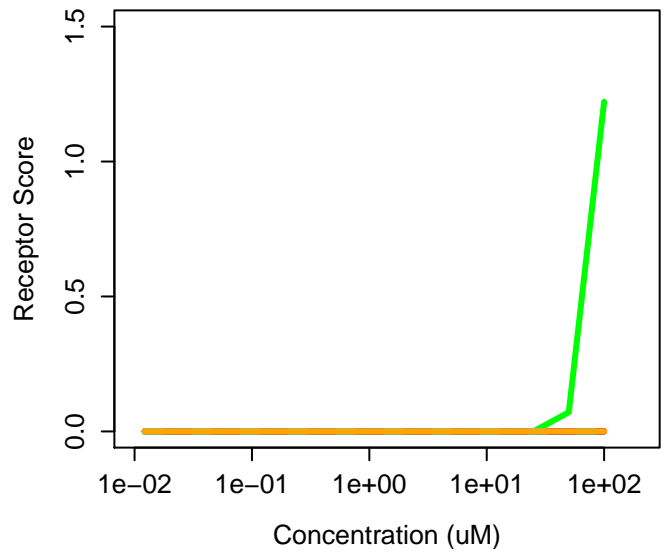

128-39-2 : 2,6-Di-tert-butylphenol

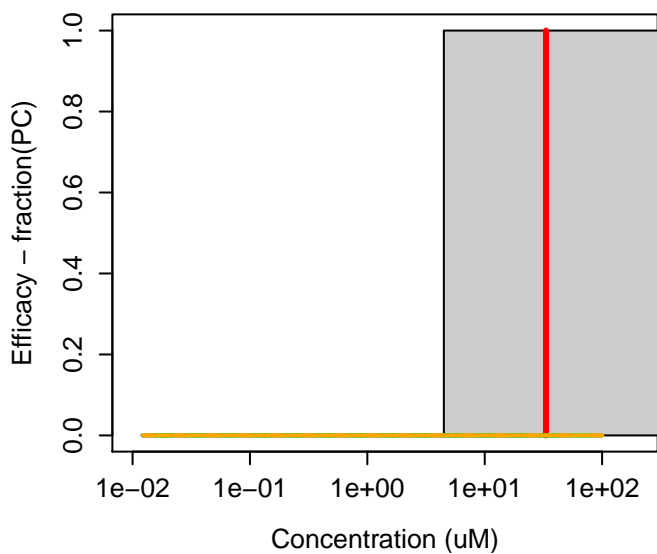

128-39-2 : 2,6-Di-tert-butylphenol  
Agonist: 0 Antagonist: 0

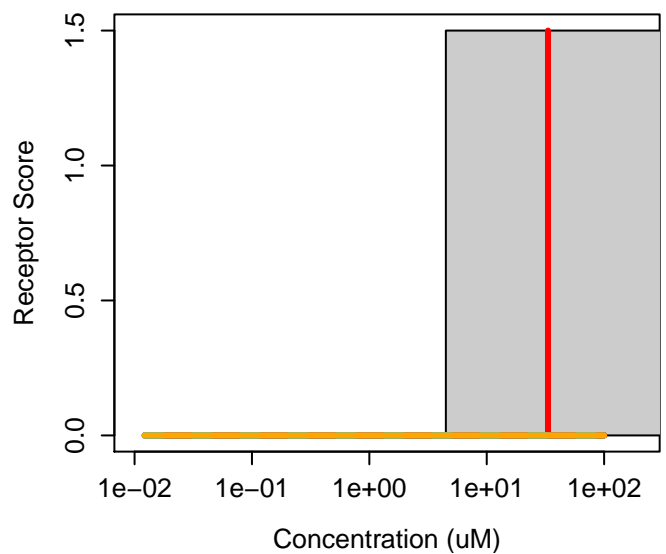

128639-02-1 : Carfentrazone-ethyl



128639-02-1 : Carfentrazone-ethyl  
Agonist: 0 Antagonist: 0



128-95-0 : 1,4-Diaminoanthraquinone

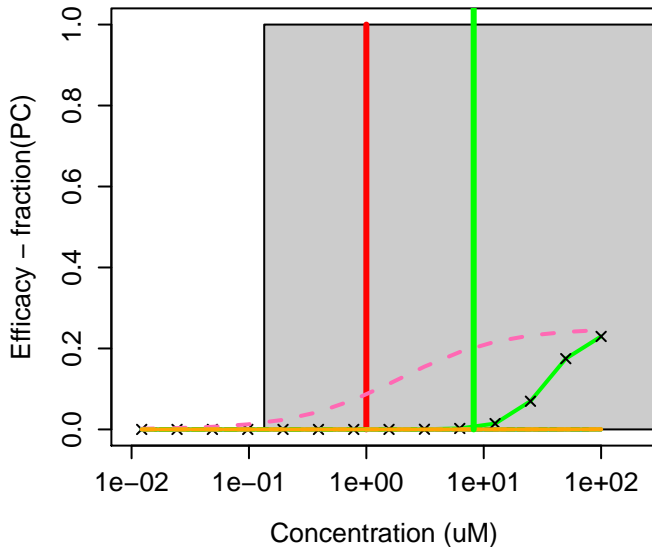

128-95-0 : 1,4-Diaminoanthraquinone  
Agonist: 0.01 Antagonist: 0

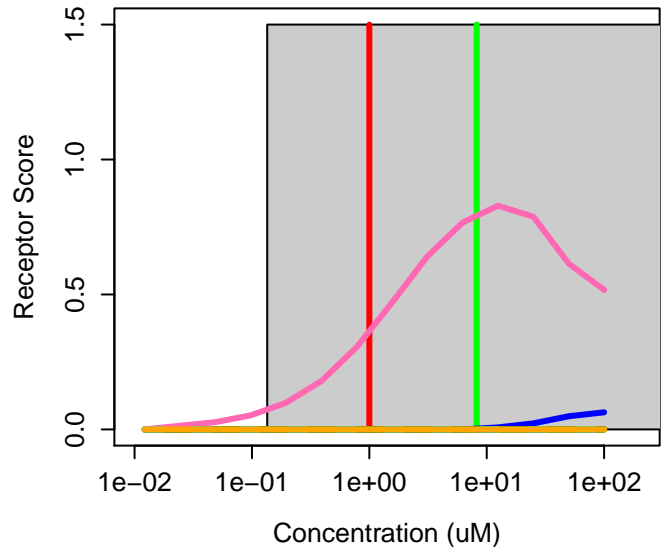

129-00-0 : Pyrene

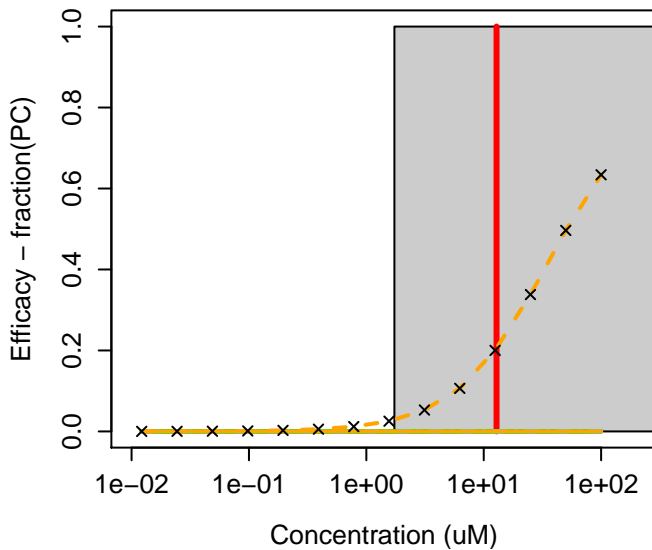

129-00-0 : Pyrene  
Agonist: 0 Antagonist: 0

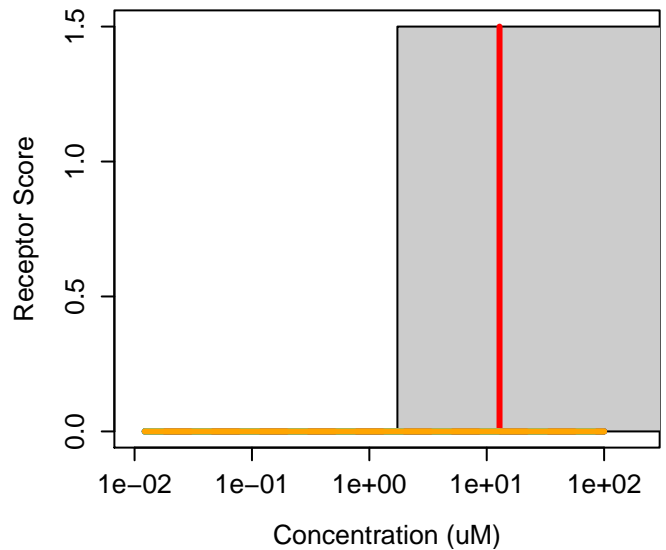

129-06-6 : Sodium warfarin

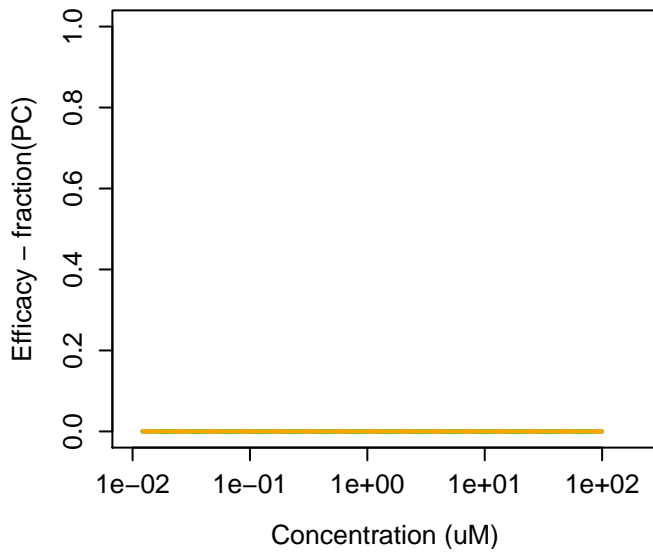

129-06-6 : Sodium warfarin  
Agonist: 0 Antagonist: 0

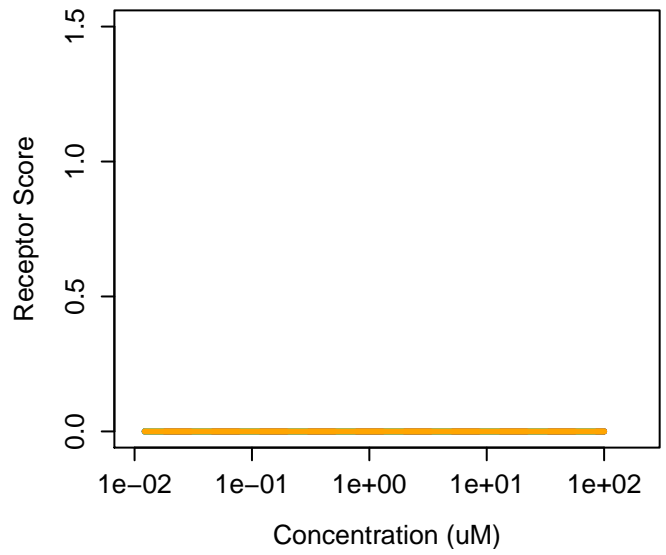

129-17-9 : Sulfan blue

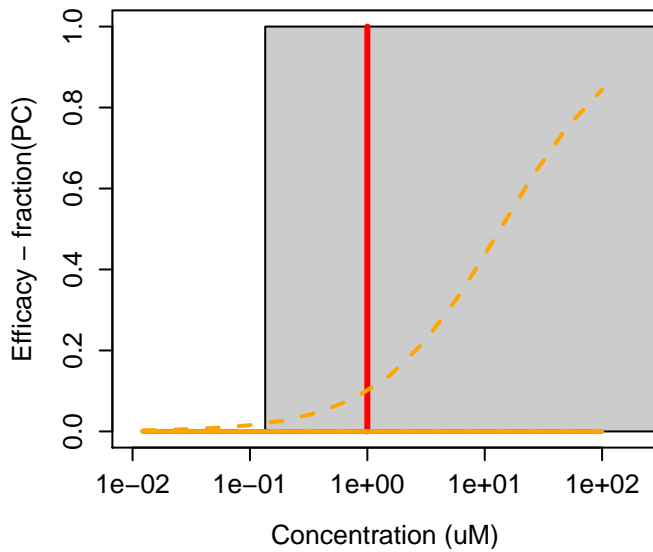

129-17-9 : Sulfan blue  
Agonist: 0 Antagonist: 0

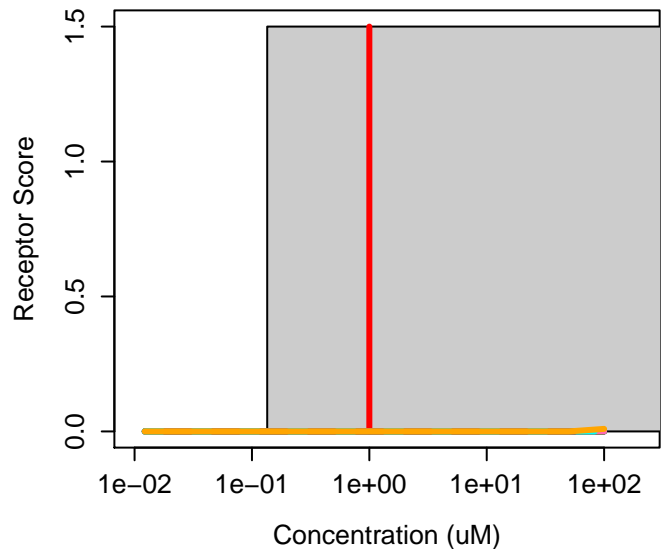

129298-91-5 : TNP-470

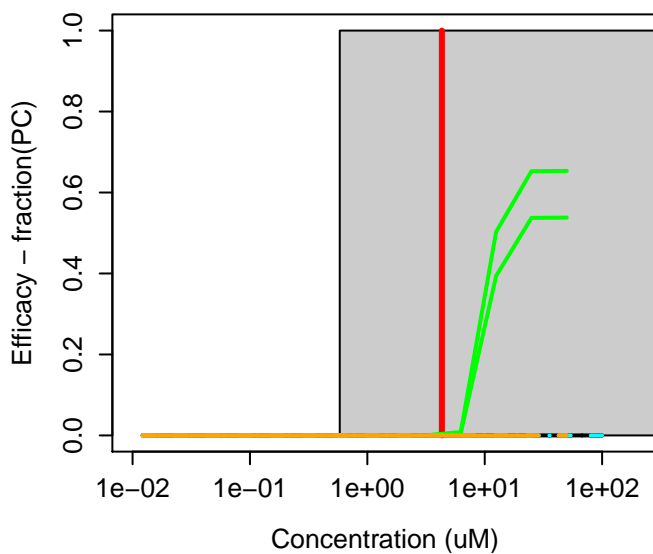

129298-91-5 : TNP-470  
Agonist: 0 Antagonist: 0

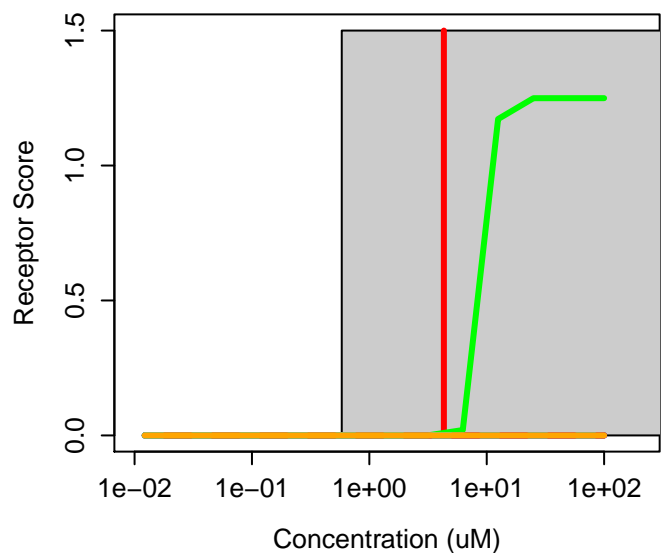



129299-90-7 : Fabesetron hydrochloride

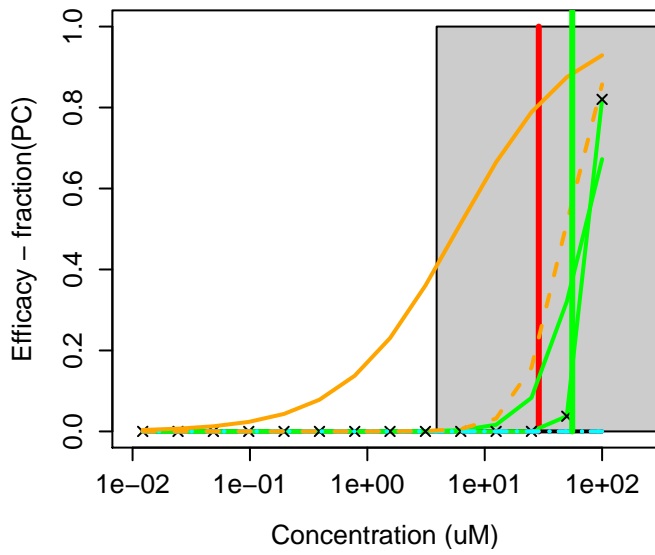

129299-90-7 : Fabesetron hydrochloride  
Agonist: 0 Antagonist: 0.12

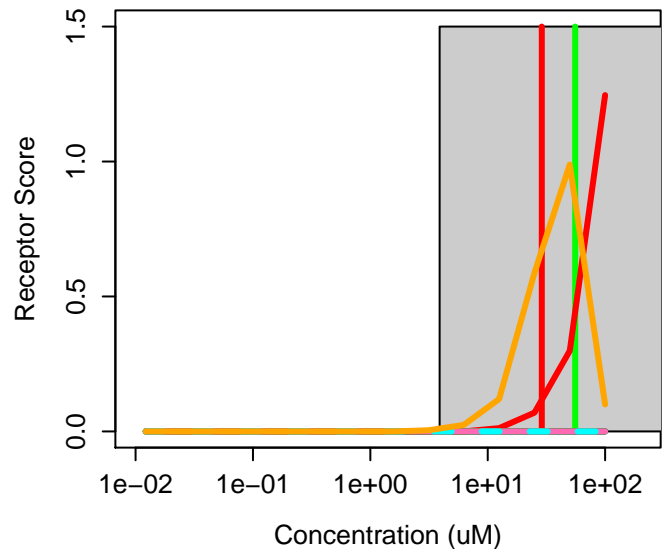

129453-61-8 : Fulvestrant

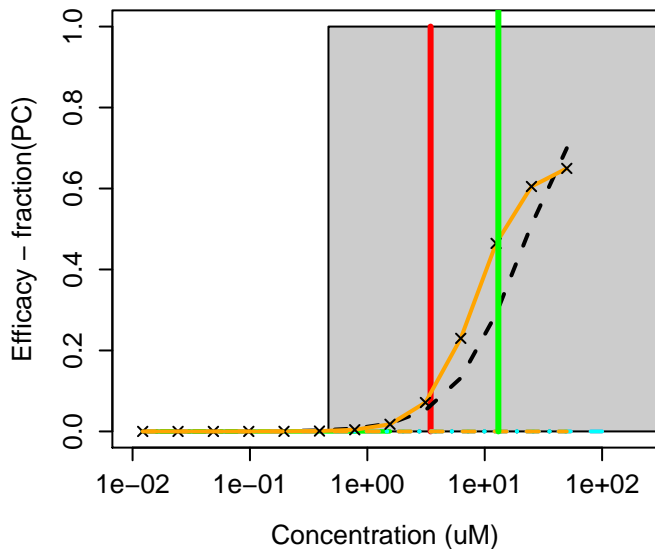

129453-61-8 : Fulvestrant  
Agonist: 0 Antagonist: 0.1

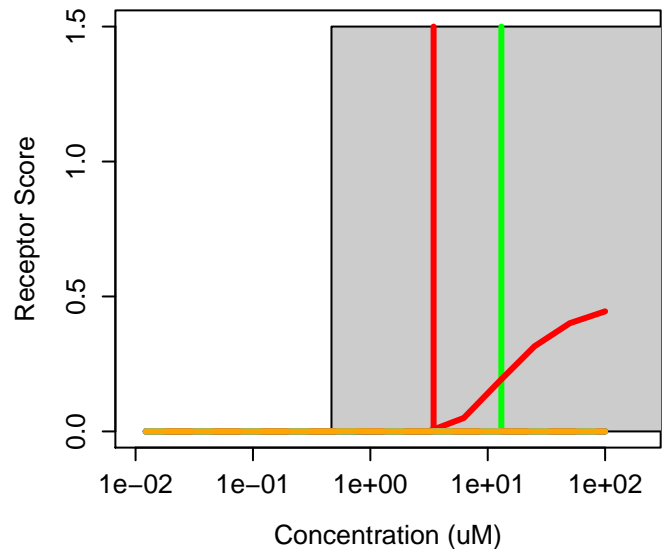

129630-19-9 : Pyraflufen-ethyl



129630-19-9 : Pyraflufen-ethyl  
Agonist: 0 Antagonist: 0



**1300-72-7 : Sodium xylenesulfonate**



**1300-72-7 : Sodium xylenesulfonate  
Agonist: 0 Antagonist: 0**



**1300-73-8 : Dimethylaniline**



**1300-73-8 : Dimethylaniline  
Agonist: 0 Antagonist: 0**



**130-14-3 : Sodium 1-naphthalenesulfonate**



**130-14-3 : Sodium 1-naphthalenesulfonate  
Agonist: 0 Antagonist: 0**



1303-11-3 : Indium arsenide

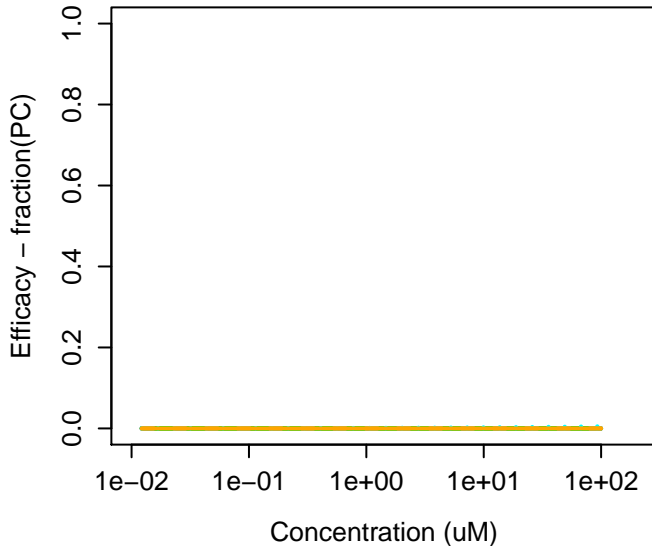

1303-11-3 : Indium arsenide  
Agonist: 0 Antagonist: 0

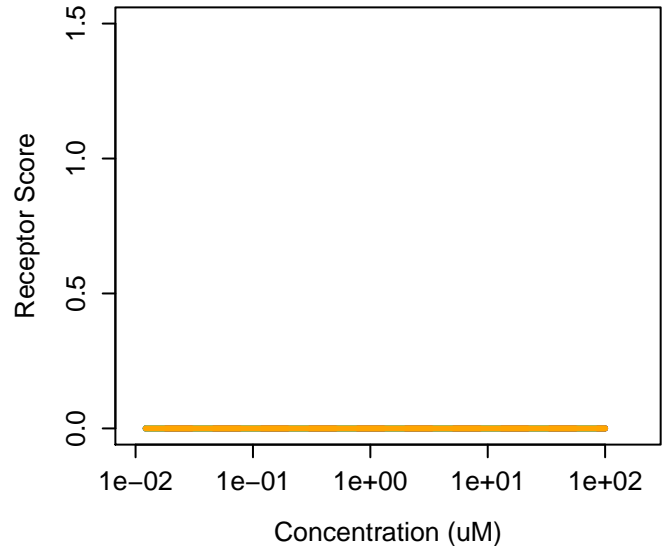

13071-79-9 : Terbufos

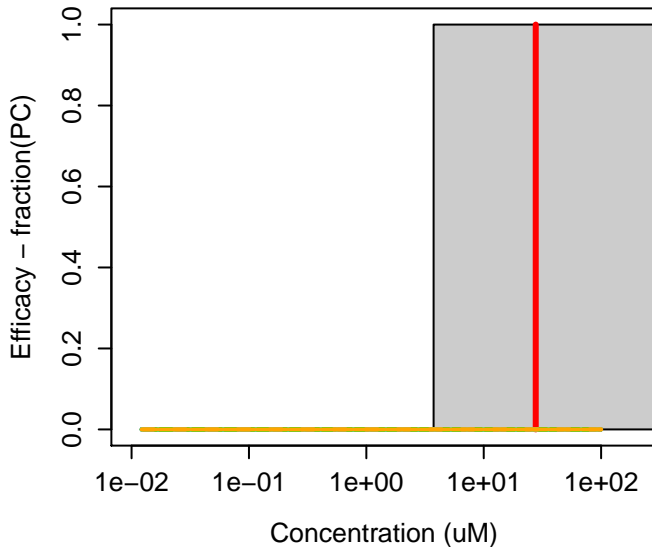

13071-79-9 : Terbufos  
Agonist: 0 Antagonist: 0

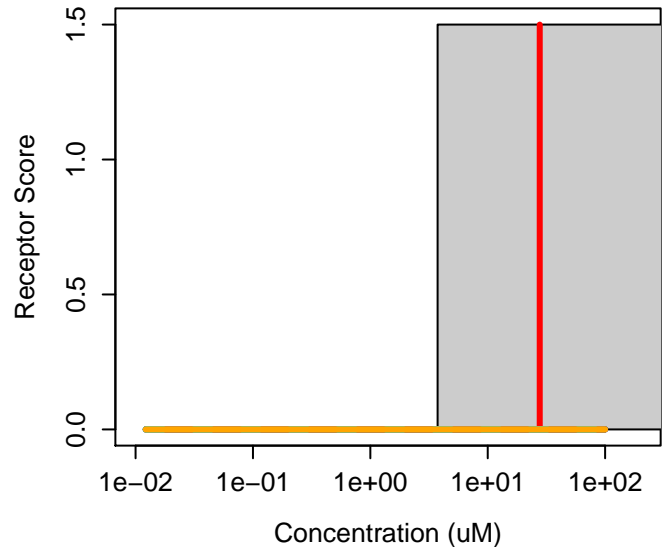

131-11-3 : Dimethyl phthalate

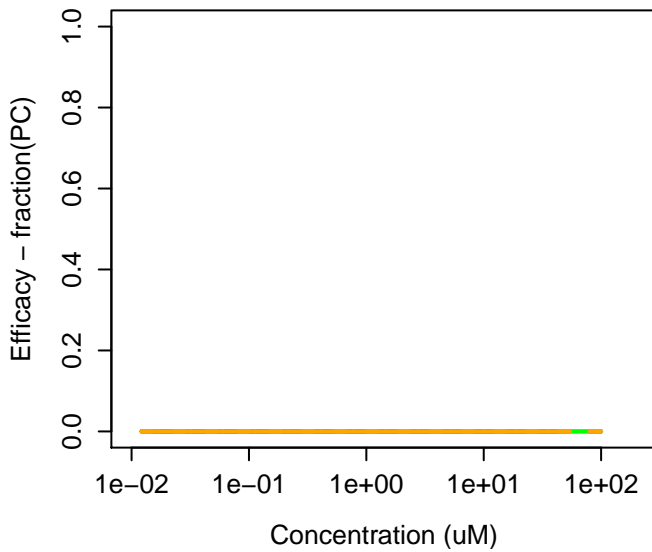

131-11-3 : Dimethyl phthalate  
Agonist: 0 Antagonist: 0



**131-17-9 : Diallyl phthalate**

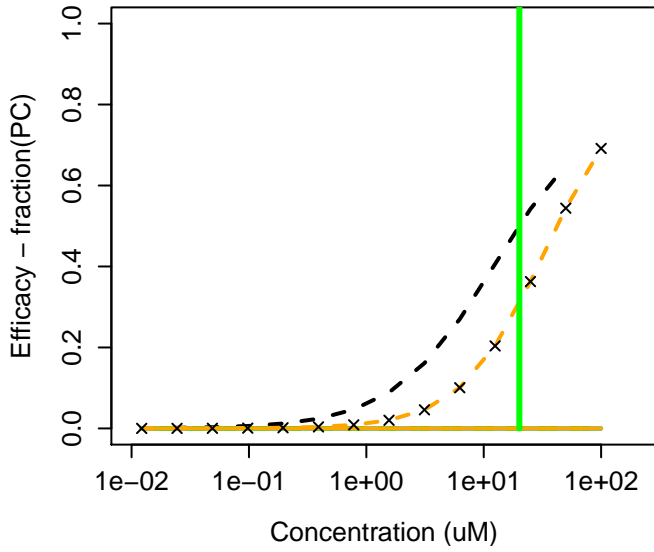

**131-17-9 : Diallyl phthalate**  
Agonist: 0 Antagonist: 0.086

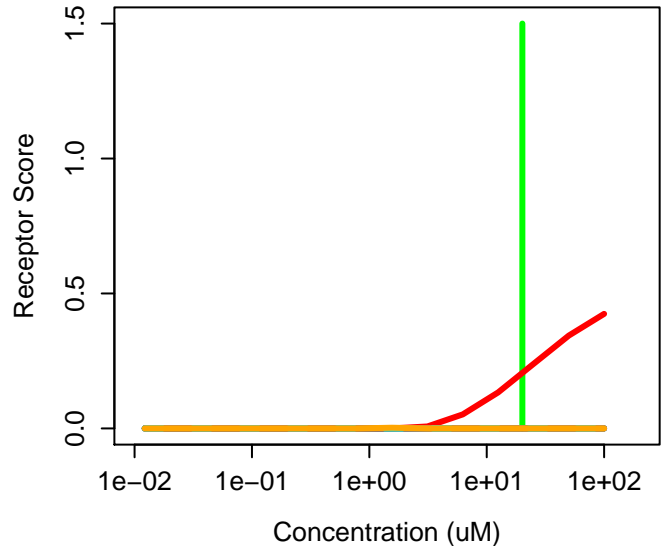

**131-18-0 : Dipentyl phthalate**

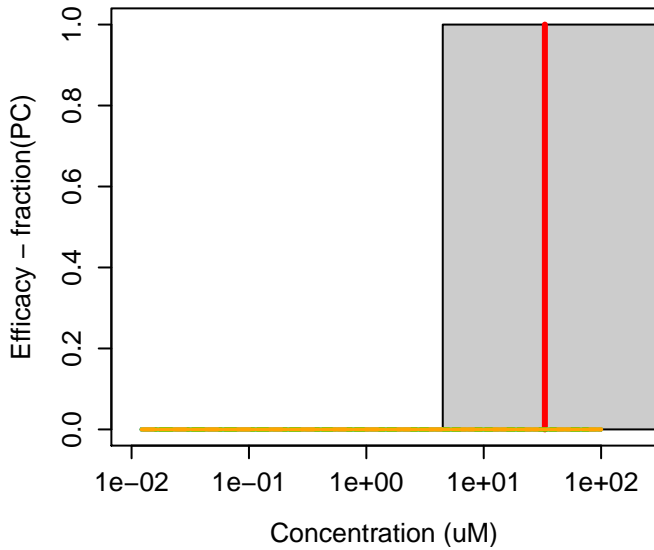

**131-18-0 : Dipentyl phthalate**  
Agonist: 0 Antagonist: 0

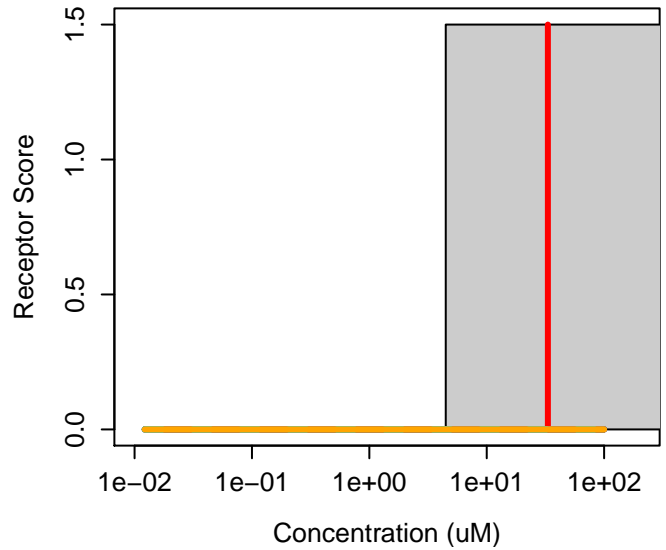

**131341-86-1 : Fludioxonil**

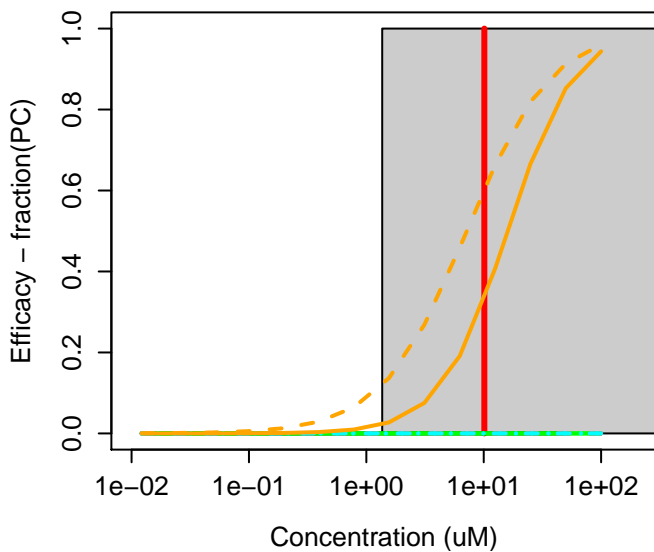

**131341-86-1 : Fludioxonil**  
Agonist: 0 Antagonist: 0.00054

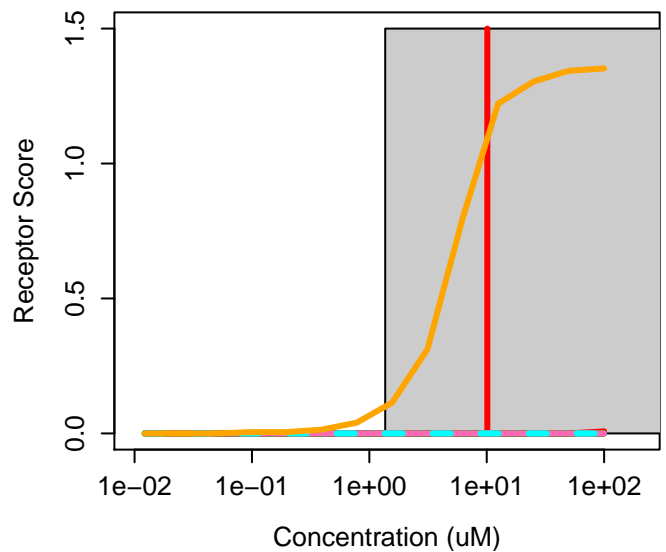

131-55-5 : 2,2',4,4'-Tetrahydroxybenzophenone

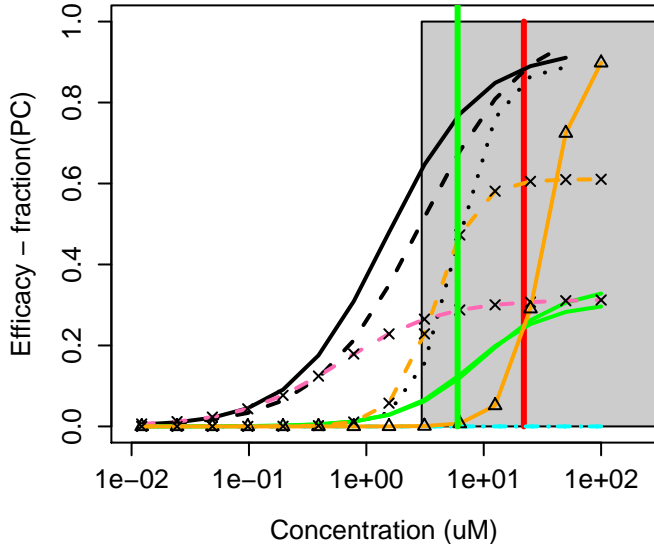

131-55-5 : 2,2',4,4'-Tetrahydroxybenzophenone  
Agonist: 0.0091 Antagonist: 0.45

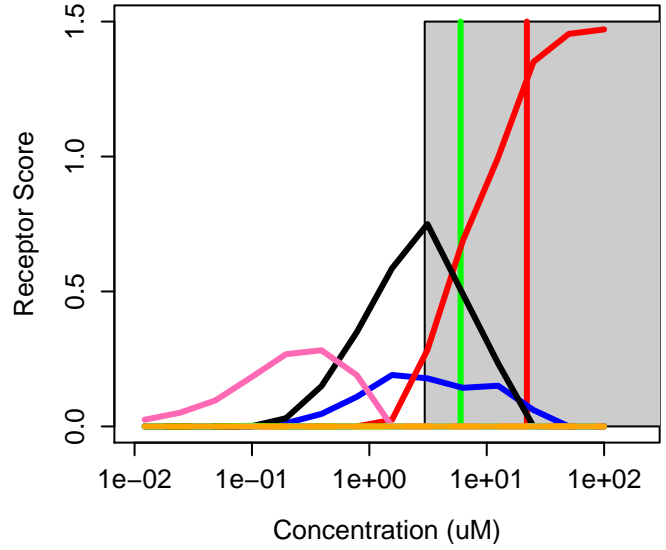

131-56-6 : 2,4-Dihydroxybenzophenone

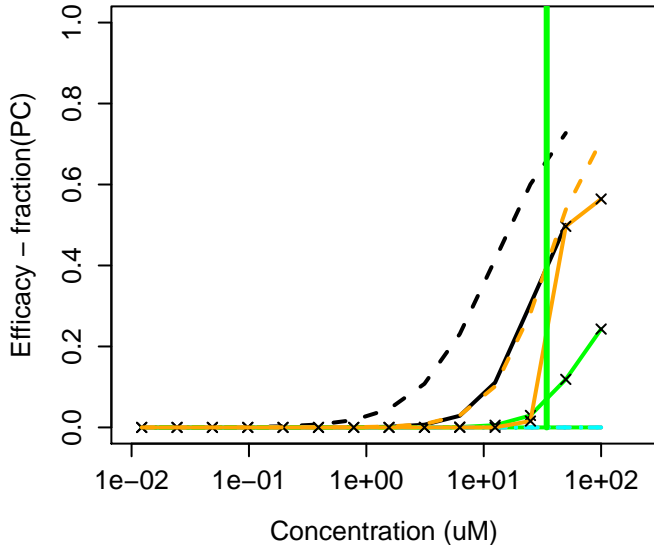

131-56-6 : 2,4-Dihydroxybenzophenone  
Agonist: 0 Antagonist: 0.21

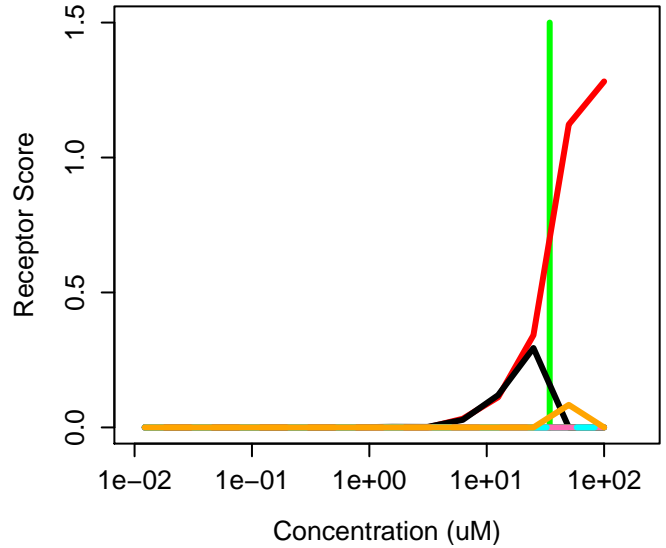

131-57-7 : 2-Hydroxy-4-methoxybenzophenone

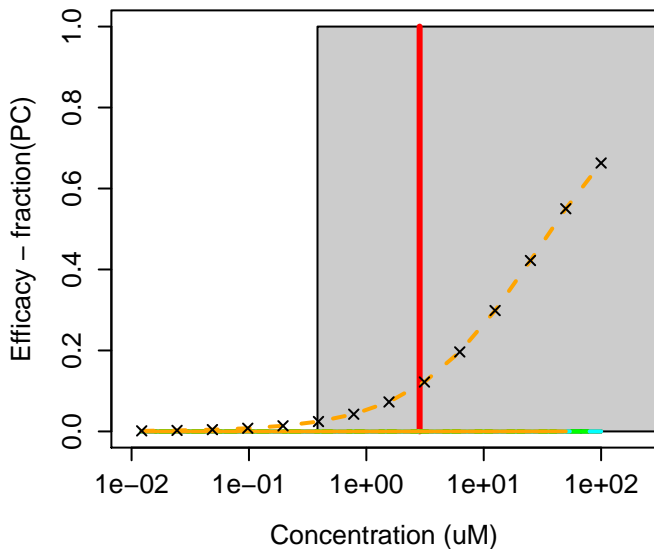

131-57-7 : 2-Hydroxy-4-methoxybenzophenone  
Agonist: 0 Antagonist: 0

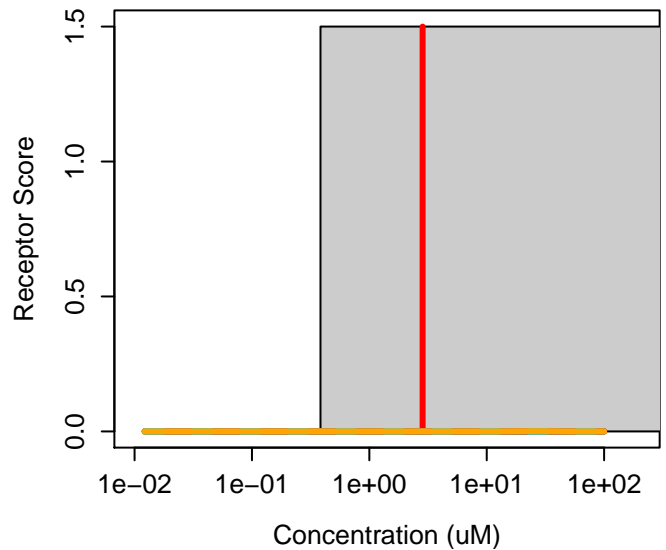

131-70-4 : Monobutyl phthalate

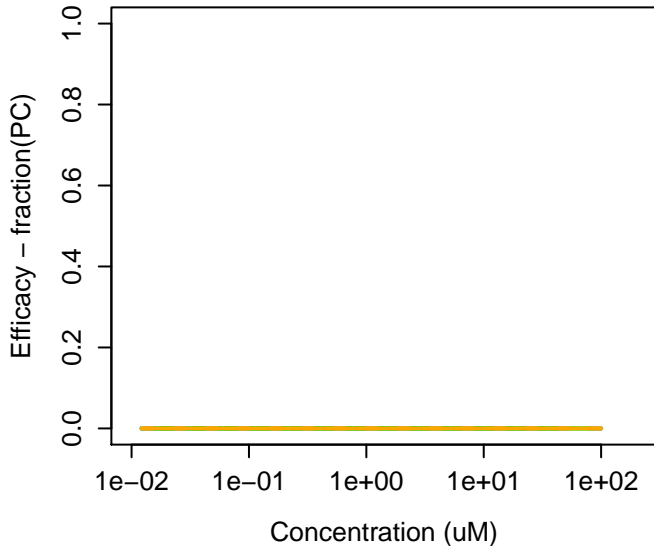

131-70-4 : Monobutyl phthalate  
Agonist: 0 Antagonist: 0



: 1-(6-tert-Butyl-1,1-dimethyl-2,3-dihydro-1H-indol-3-yl)ethanone : 1-(6-tert-Butyl-1,1-dimethyl-2,3-dihydro-1H-indol-3-yl)ethanone  
Agonist: 6e-05 Antagonist: 0

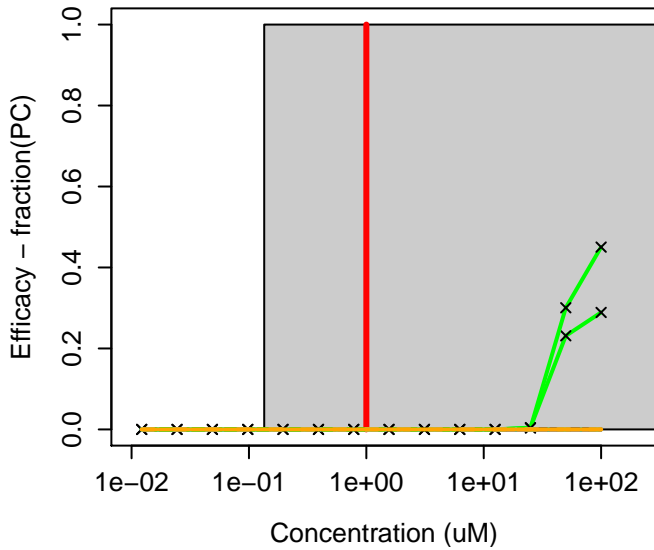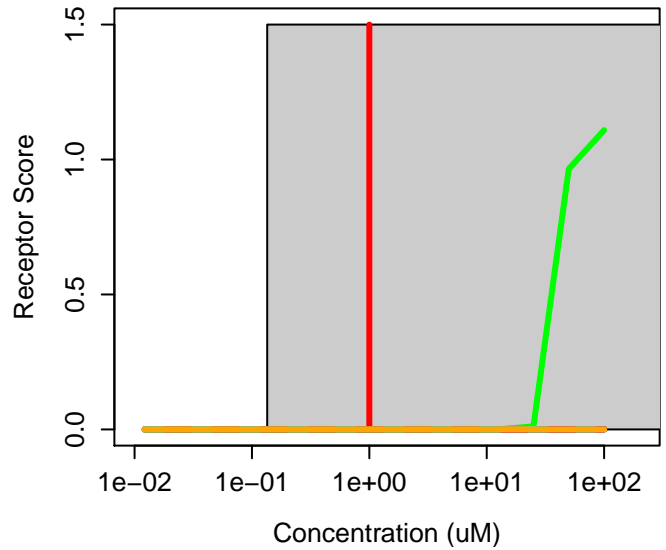

131807-57-3 : Famoxadone

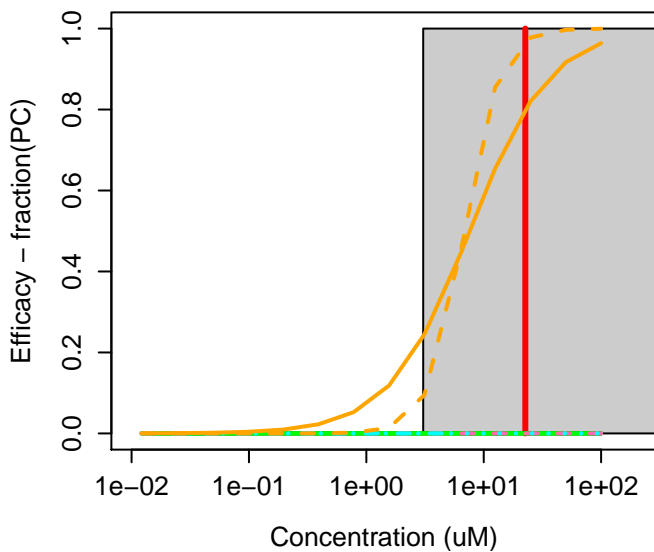

131807-57-3 : Famoxadone  
Agonist: 0 Antagonist: 0.00043

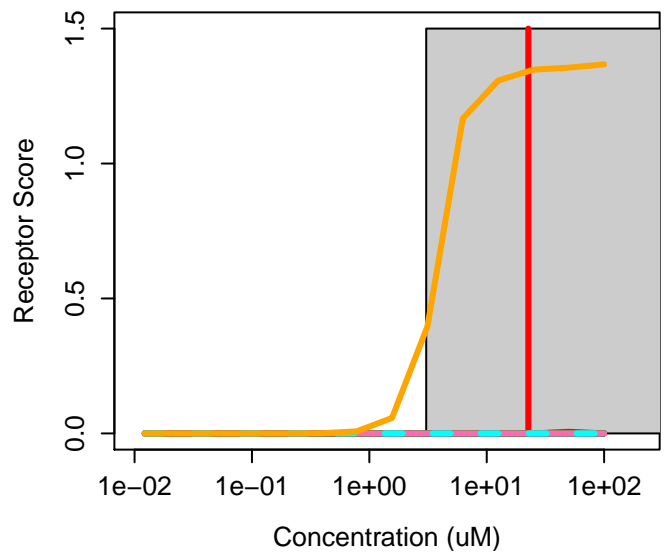

131860-33-8 : Azoxystrobin

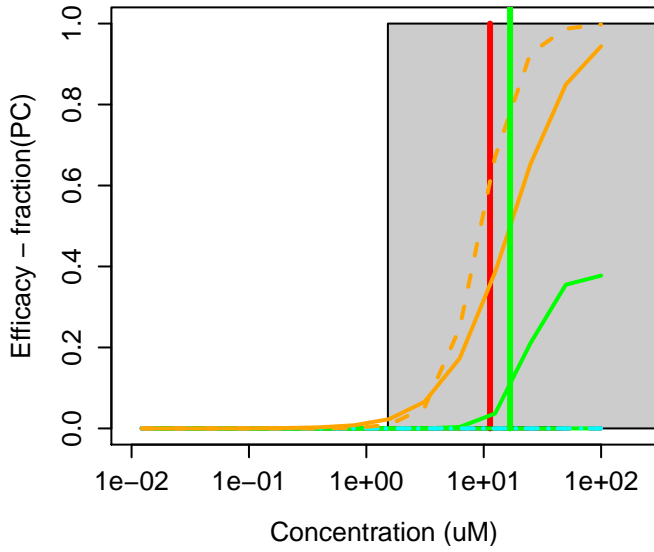

131860-33-8 : Azoxystrobin  
Agonist: 0 Antagonist: 0.059

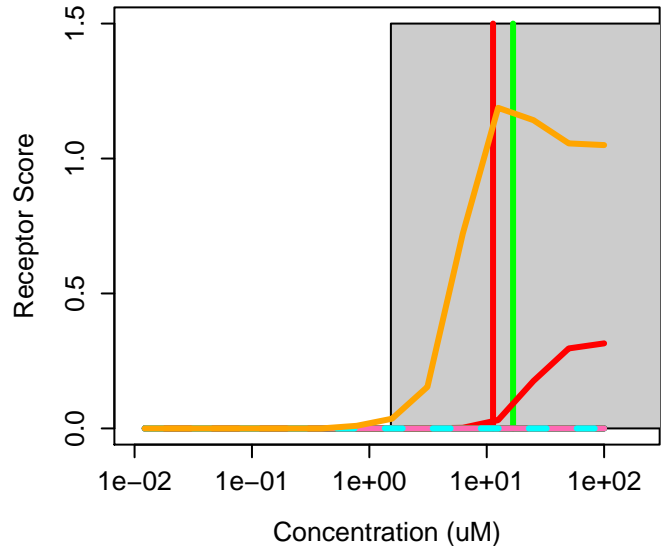

13194-48-4 : Ethoprop

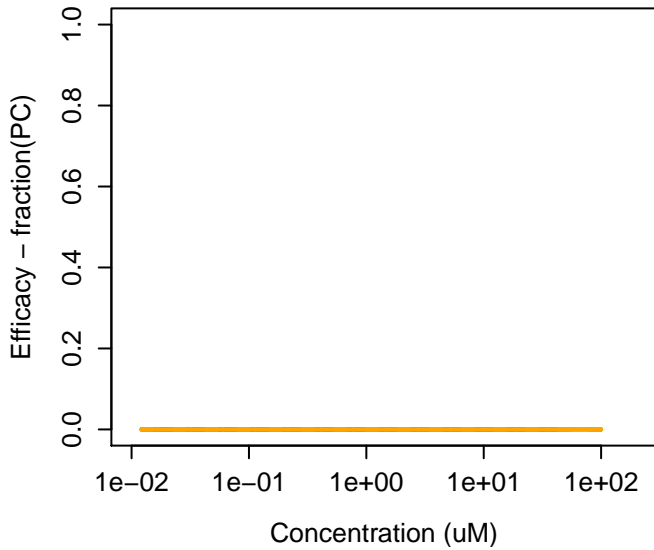

13194-48-4 : Ethoprop  
Agonist: 0 Antagonist: 0



131983-72-7 : Triticonazole

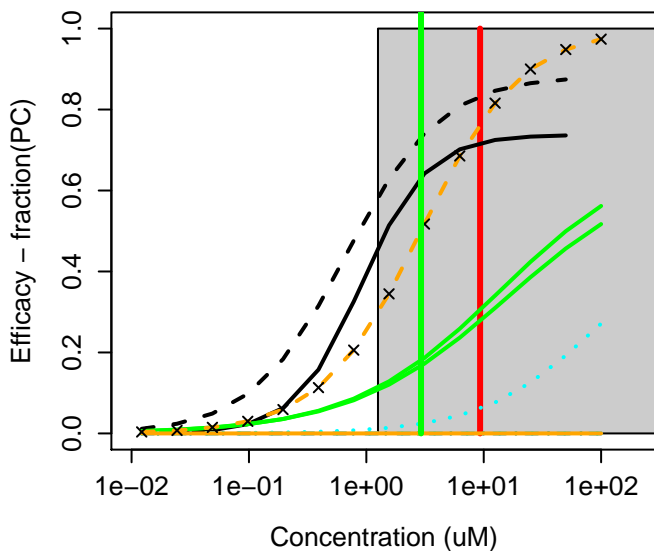

131983-72-7 : Triticonazole  
Agonist: 0.00073 Antagonist: 0.63

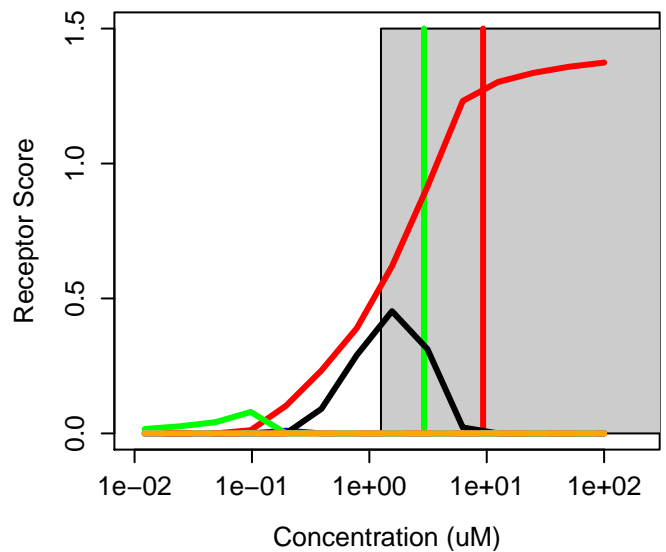

1320-07-6 : C.I. Acid Orange 24, monosodium sa

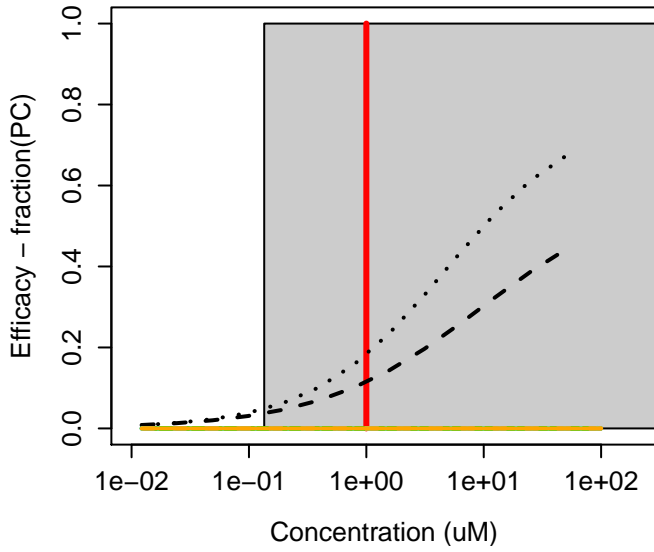

1320-07-6 : C.I. Acid Orange 24, monosodium sa  
Agonist: 0 Antagonist: 0

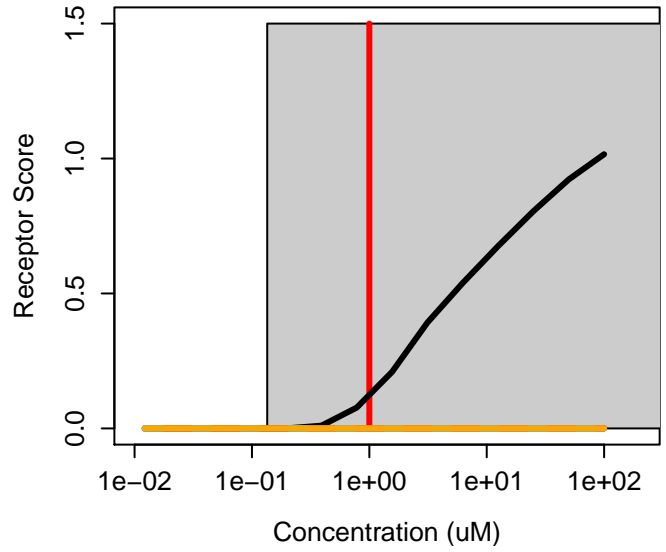

1321-74-0 : Divinylbenzene

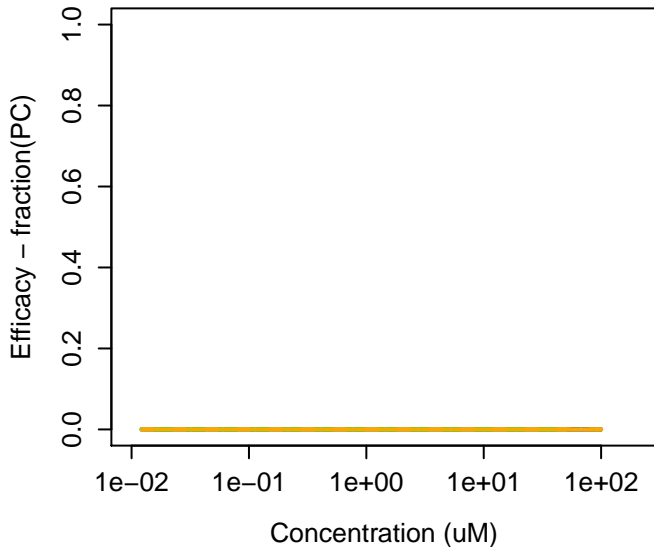

1321-74-0 : Divinylbenzene  
Agonist: 0 Antagonist: 0



1323-19-9 : Sodium triisopropyl naphthalene sulfonate

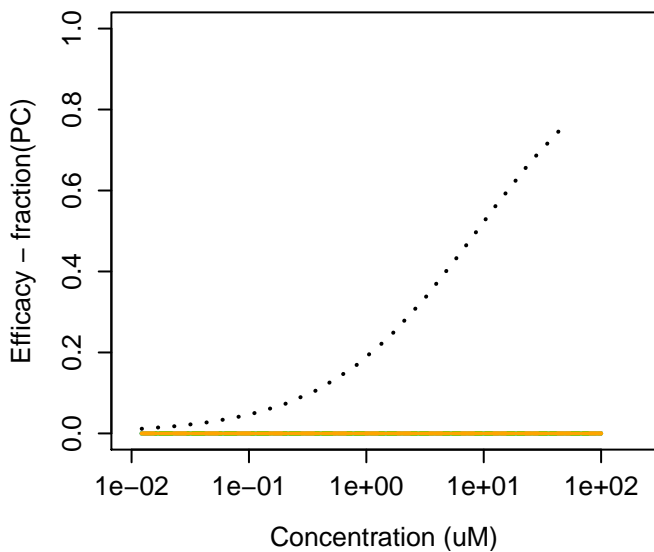

1323-19-9 : Sodium triisopropyl naphthalene sulfonate  
Agonist: 0 Antagonist: 0

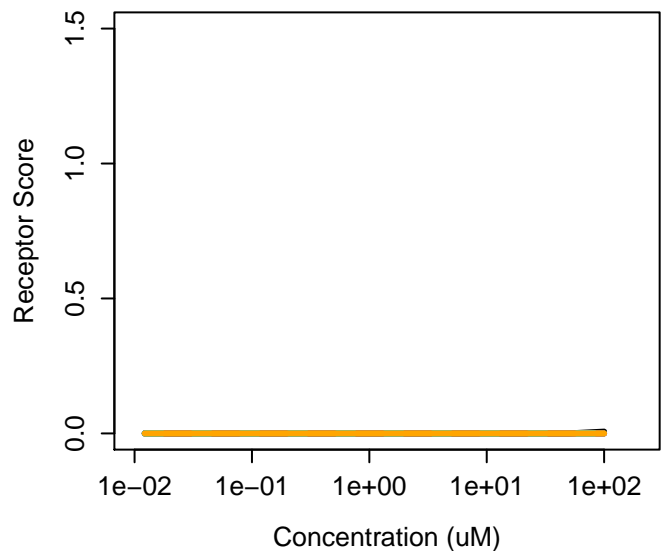



**1323-38-2 : Glycerol monoricinoleate**

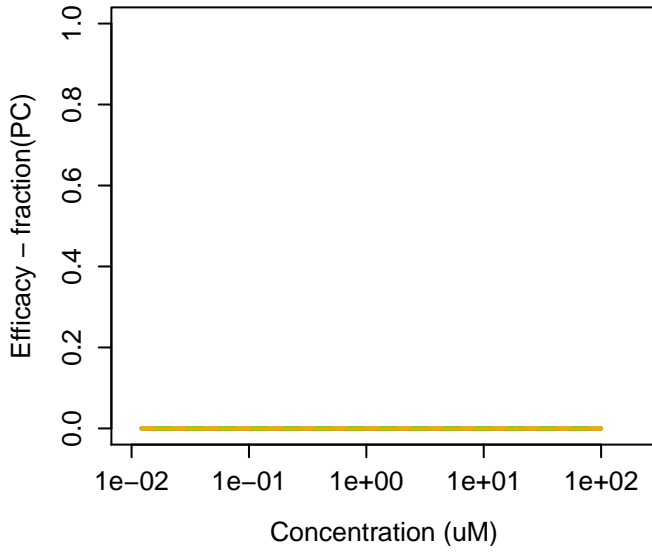

**1323-38-2 : Glycerol monoricinoleate  
Agonist: 0 Antagonist: 0**



**13254-34-7 : 2,6-Dimethyl-2-heptanol**

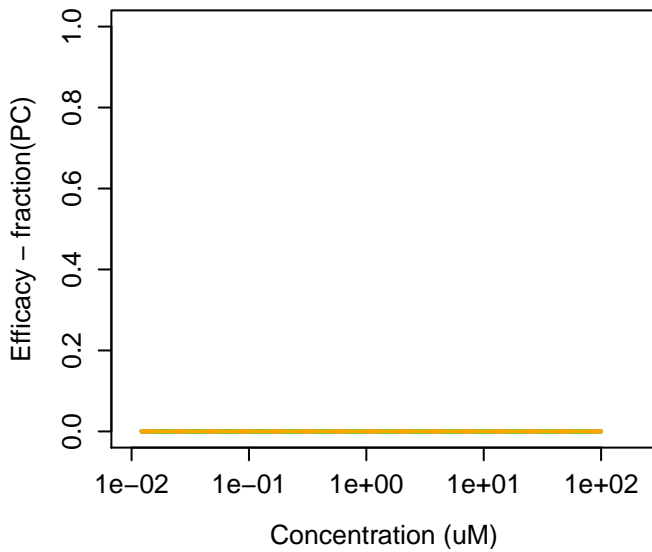

**13254-34-7 : 2,6-Dimethyl-2-heptanol  
Agonist: 0 Antagonist: 0**



**132-64-9 : Dibenzofuran**



**132-64-9 : Dibenzofuran  
Agonist: 0 Antagonist: 0**



132-65-0 : Dibenzothiophene

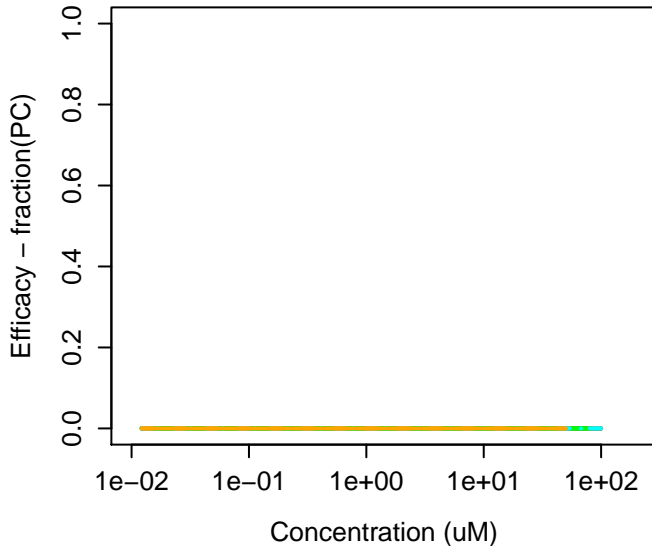

132-65-0 : Dibenzothiophene  
Agonist: 0 Antagonist: 0



13292-46-1 : Rifampicin

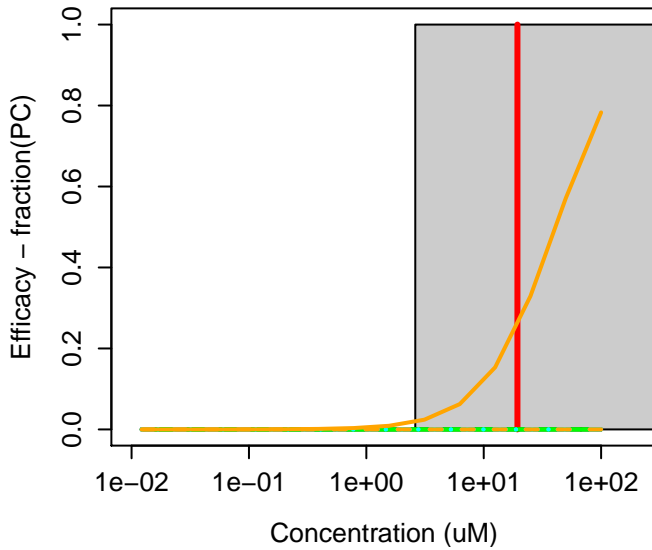

13292-46-1 : Rifampicin  
Agonist: 0 Antagonist: 0

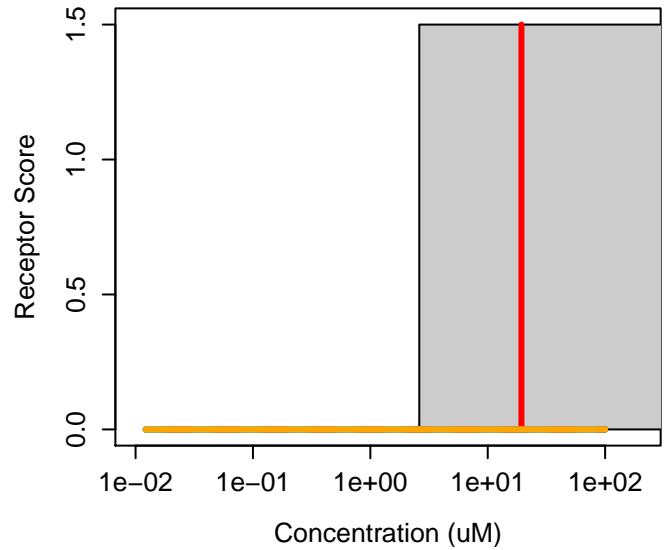

13301-61-6 : C.I. Disperse Orange 37

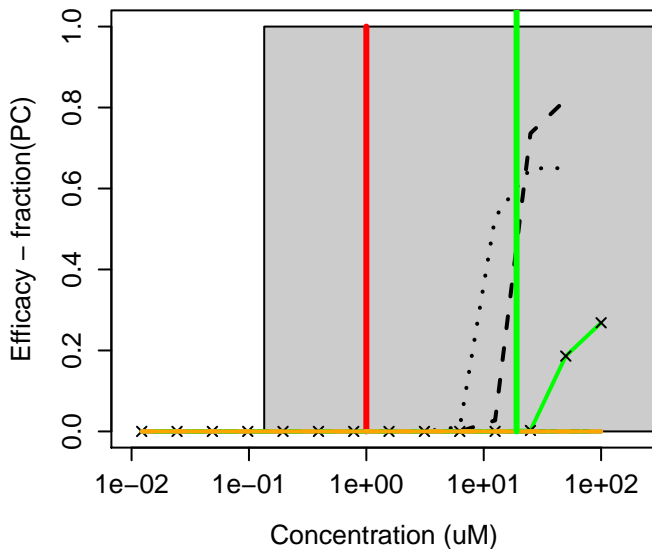

13301-61-6 : C.I. Disperse Orange 37  
Agonist: 0.014 Antagonist: 0.027

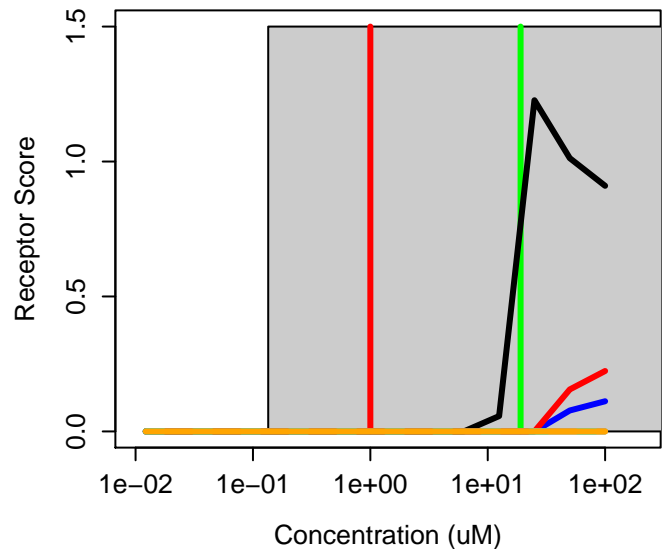

133-06-2 : Captan

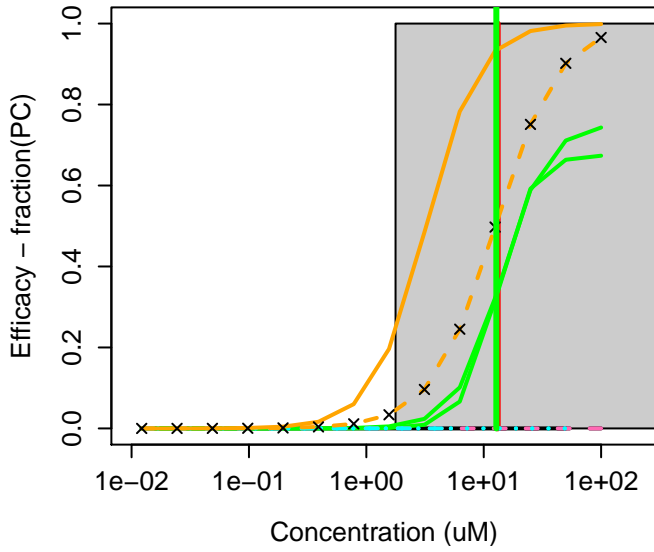

133-06-2 : Captan  
Agonist: 0 Antagonist: 0.29

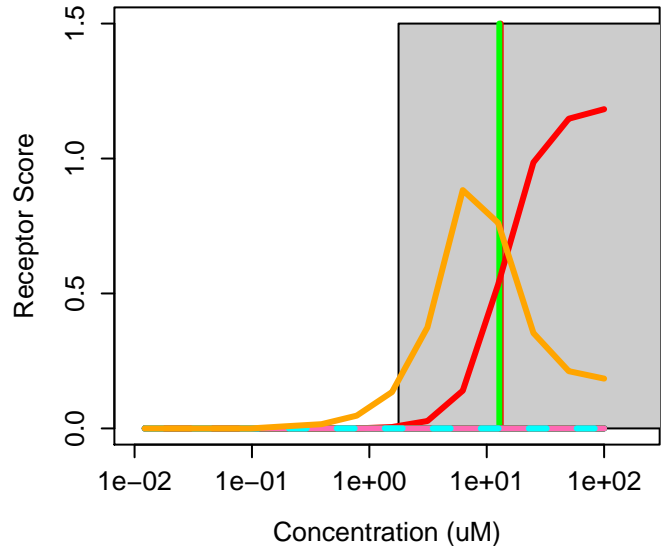

133-07-3 : Folpet

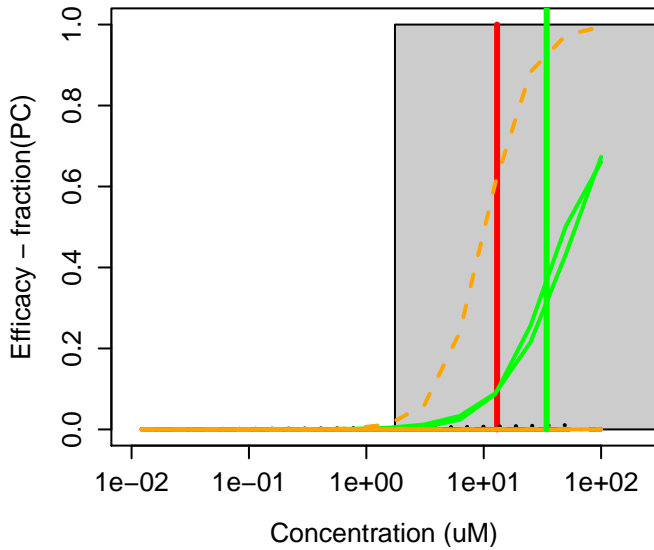

133-07-3 : Folpet  
Agonist: 0 Antagonist: 0.14

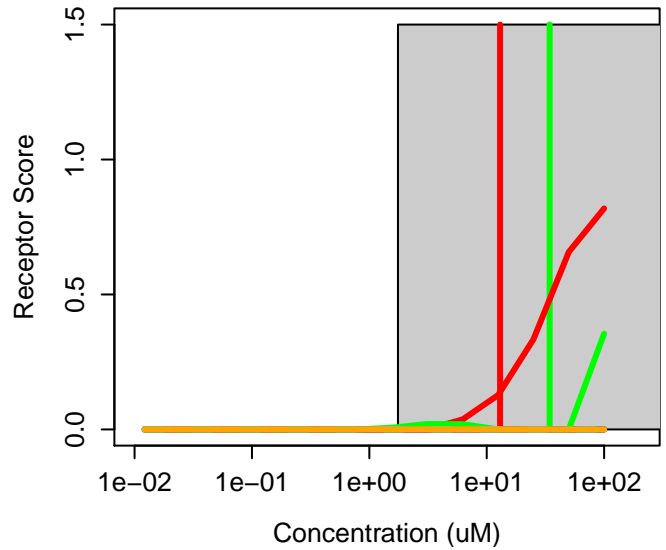

1330-78-5 : Tricresyl phosphate

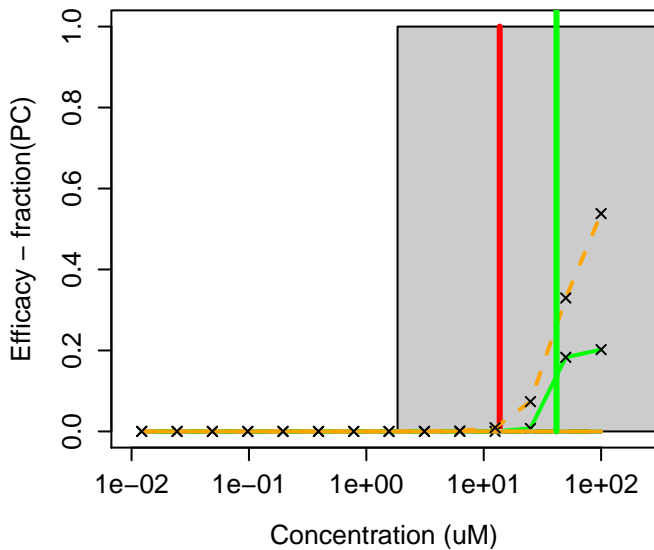

1330-78-5 : Tricresyl phosphate  
Agonist: 0 Antagonist: 0.017

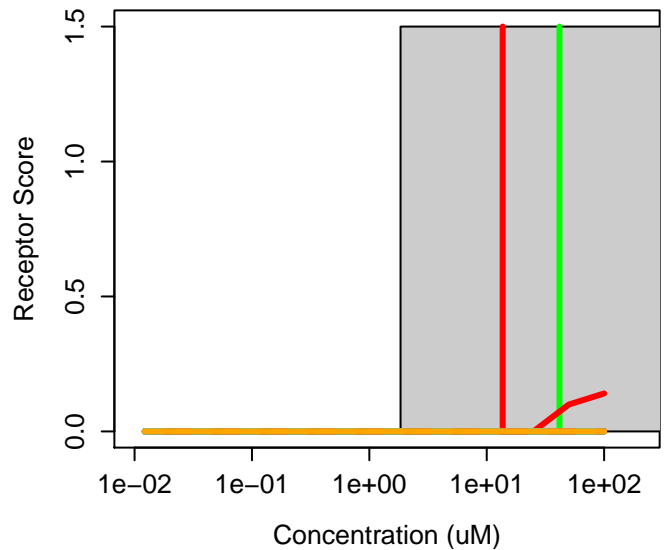

1330-86-5 : Diisooctyl adipate



1330-86-5 : Diisooctyl adipate  
Agonist: 0 Antagonist: 0



13311-84-7 : Flutamide

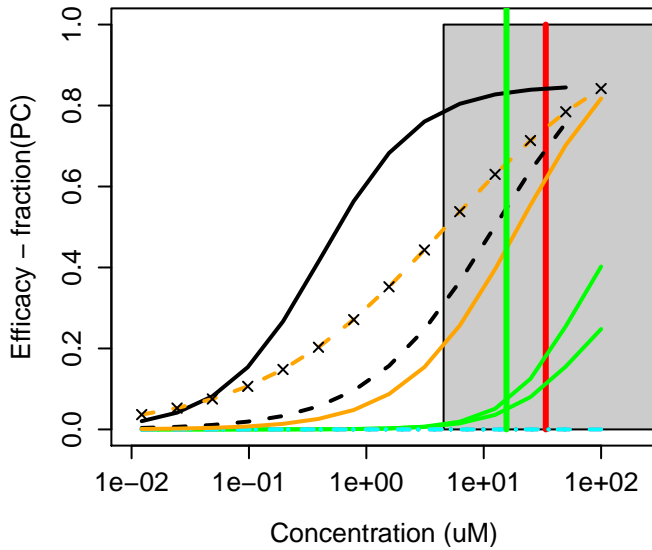

13311-84-7 : Flutamide  
Agonist: 0 Antagonist: 0.55

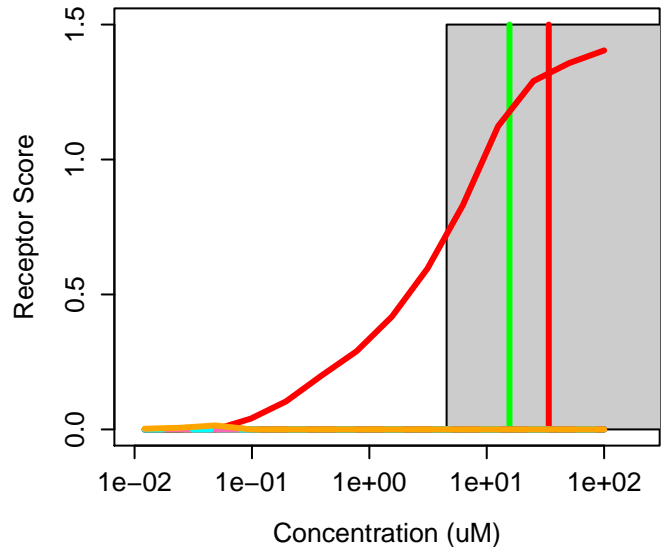

1333-39-7 : Phenolsulfonic acid



1333-39-7 : Phenolsulfonic acid  
Agonist: 0 Antagonist: 0



1335-46-2 : Methylinone



1335-46-2 : Methylinone  
Agonist: 0 Antagonist: 0



1338-43-8 : Sorbitan, mono-(9Z)-9-octadecenoa

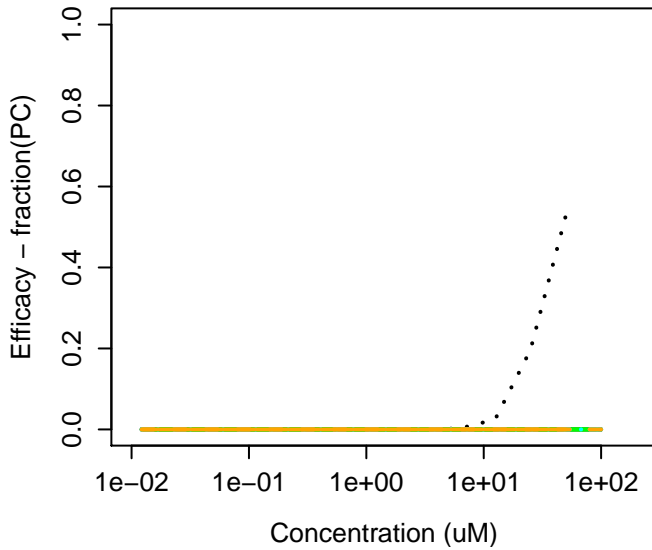

1338-43-8 : Sorbitan, mono-(9Z)-9-octadecenoa  
Agonist: 0 Antagonist: 0



133855-98-8 : Epoxiconazole

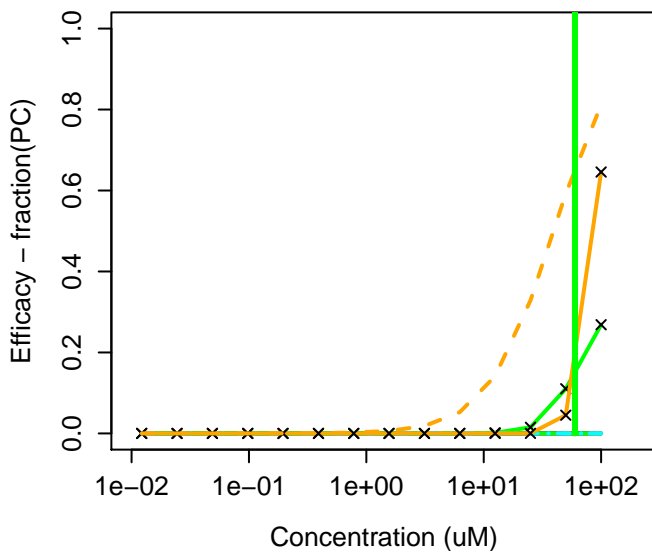

133855-98-8 : Epoxiconazole  
Agonist: 0 Antagonist: 0.023

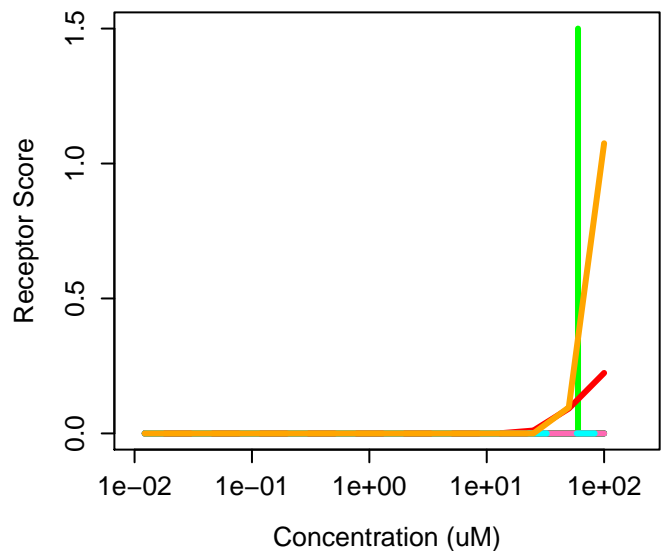

133-90-4 : Chloramben



133-90-4 : Chloramben  
Agonist: 0 Antagonist: 0



134002-60-1 : CP-085958

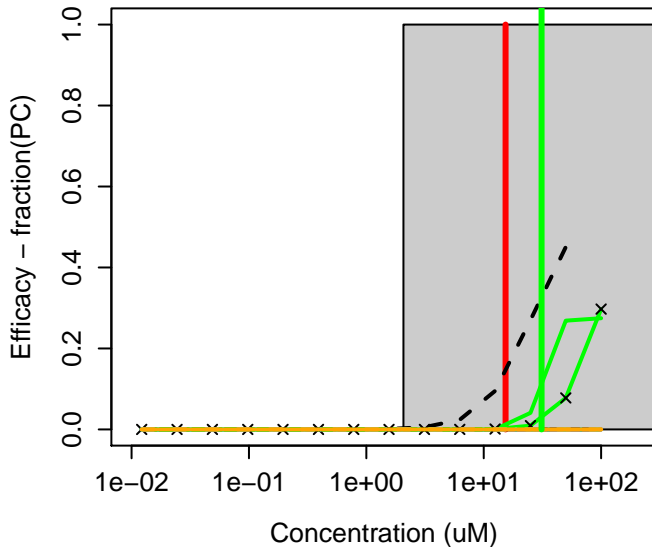

134002-60-1 : CP-085958  
Agonist: 0.016 Antagonist: 0.032

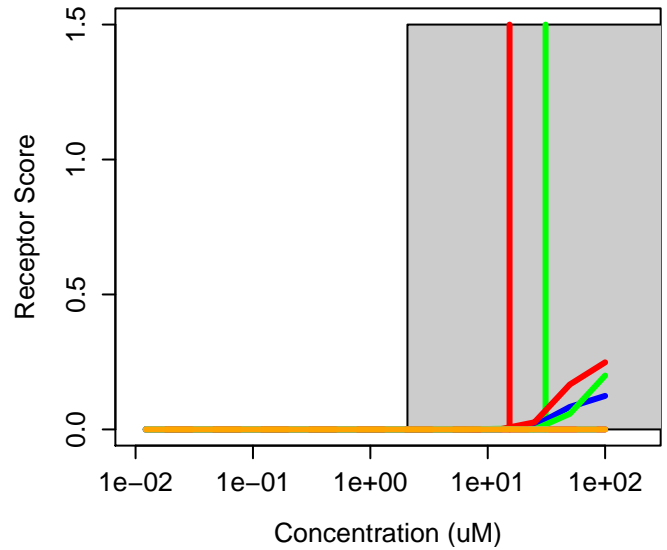

134-03-2 : Sodium L-ascorbate



134-03-2 : Sodium L-ascorbate  
Agonist: 0 Antagonist: 0



134-20-3 : Methyl 2-aminobenzoate



134-20-3 : Methyl 2-aminobenzoate  
Agonist: 0 Antagonist: 0



134-31-6 : 8-Hydroxyquinoline sulfate

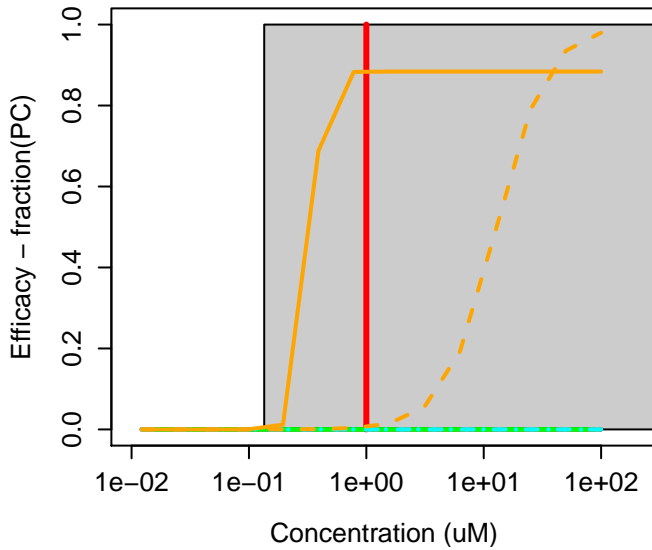

134-31-6 : 8-Hydroxyquinoline sulfate  
Agonist: 0 Antagonist: 0

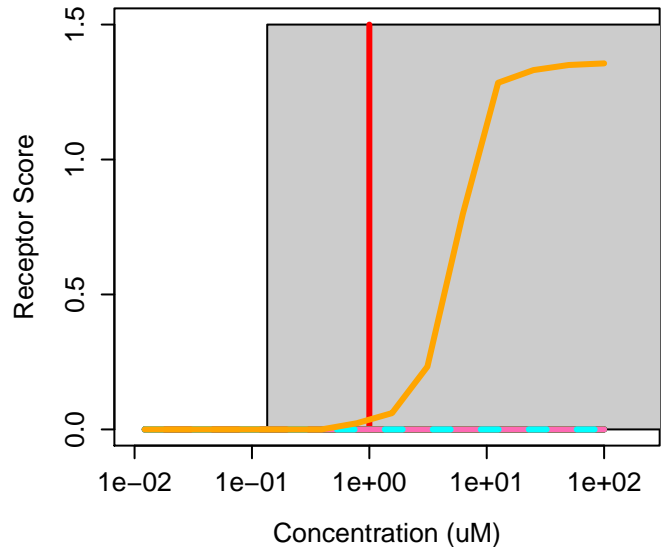

134523-03-8 : Atorvastatin calcium

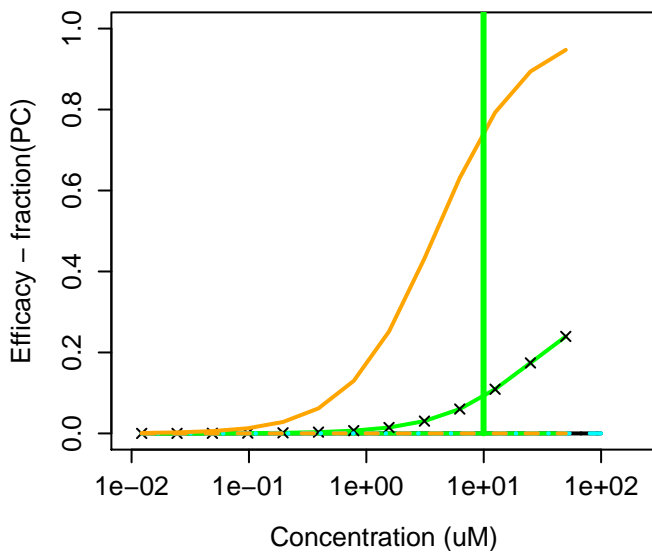

134523-03-8 : Atorvastatin calcium  
Agonist: 0 Antagonist: 0.045

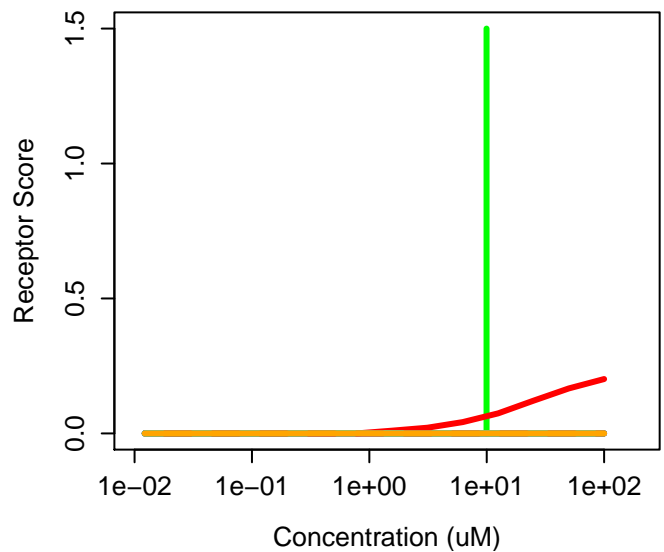

134605-64-4 : Butafenacil

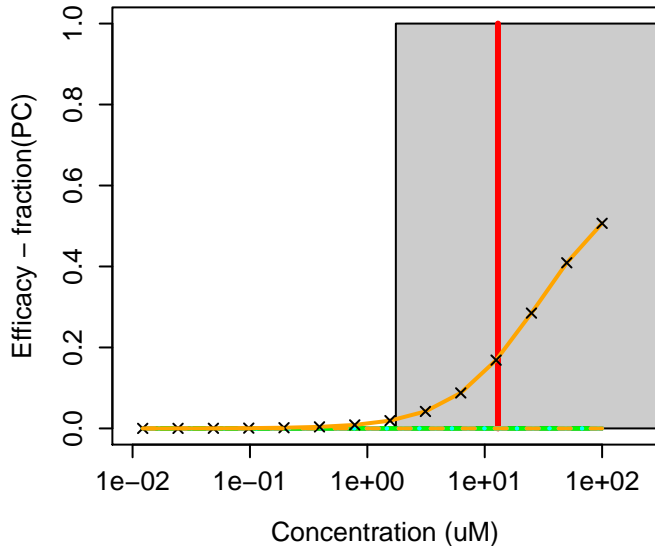

134605-64-4 : Butafenacil  
Agonist: 0 Antagonist: 0

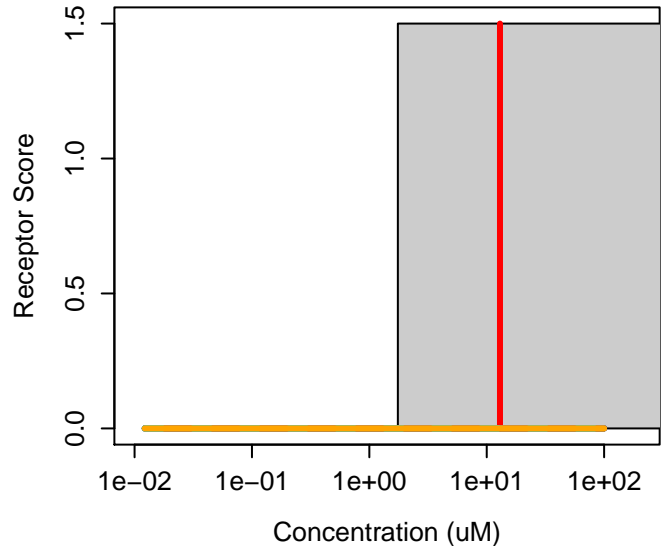

134-62-3 : DEET

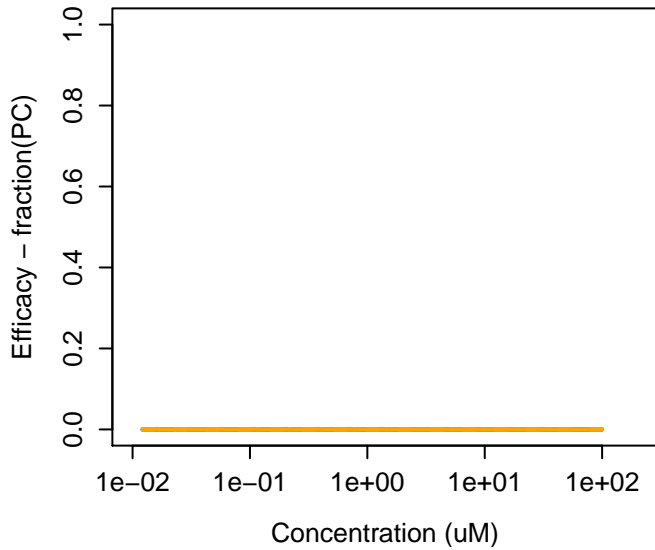

134-62-3 : DEET  
Agonist: 0 Antagonist: 0



13463-41-7 : Zinc pyrithione

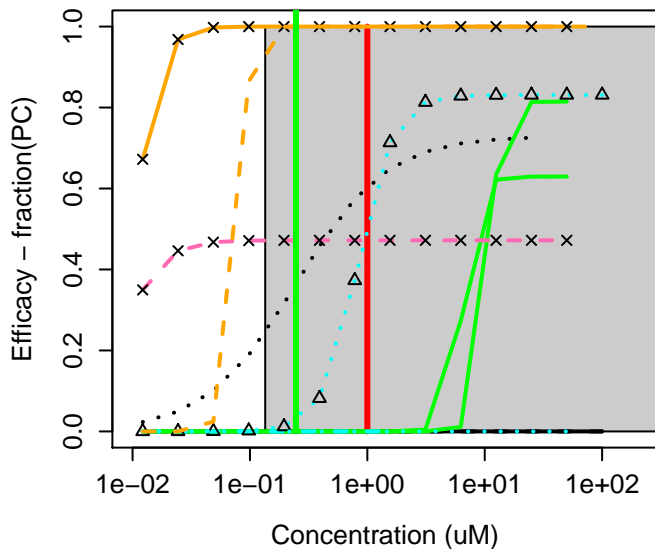

13463-41-7 : Zinc pyrithione  
Agonist: 0 Antagonist: 0.64

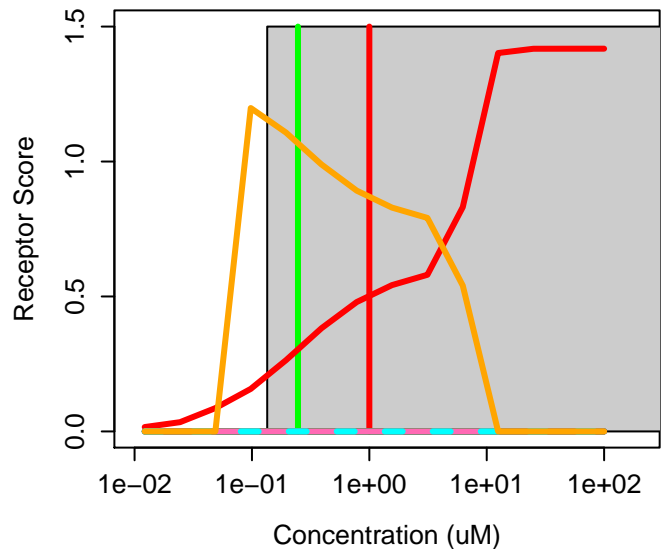



135080-03-4 : CP-100829

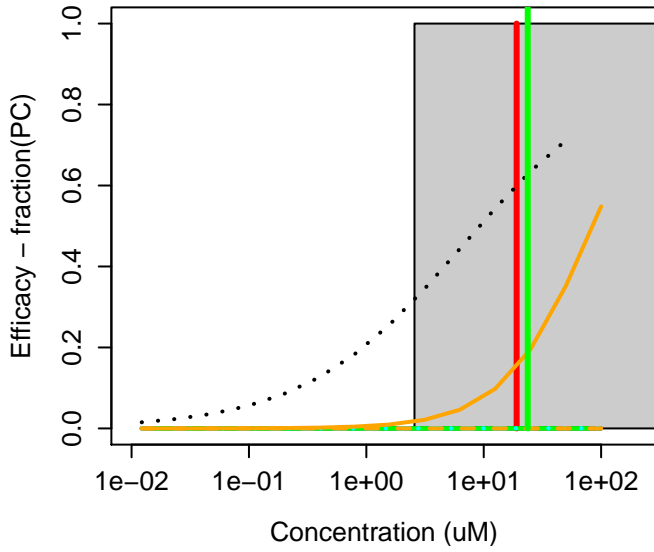

135080-03-4 : CP-100829  
Agonist: 0 Antagonist: 0.063

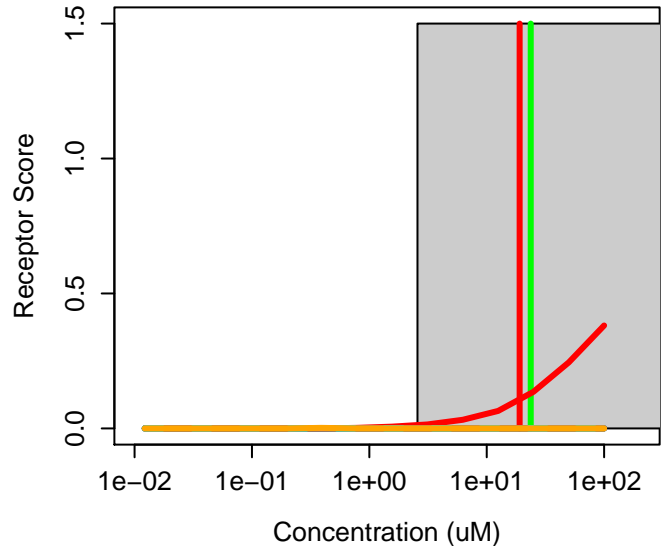

135158-54-2 : Acibenzolar-S-methyl

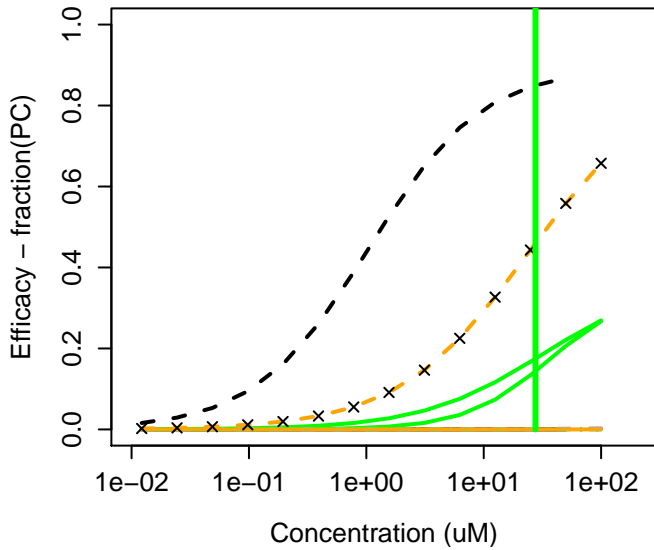

135158-54-2 : Acibenzolar-S-methyl  
Agonist: 0 Antagonist: 0.21

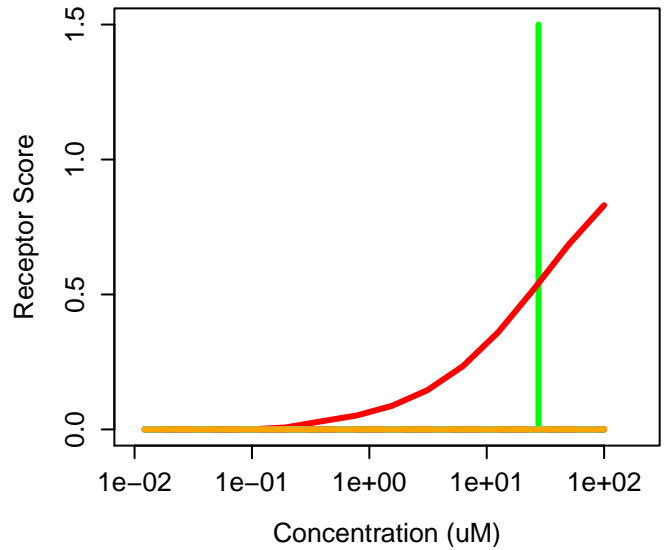

135-19-3 : 2-Naphthalenol

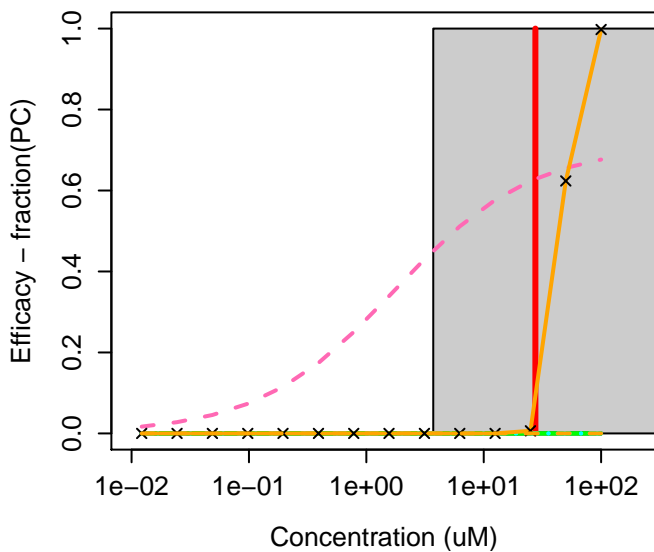

135-19-3 : 2-Naphthalenol  
Agonist: 0 Antagonist: 0

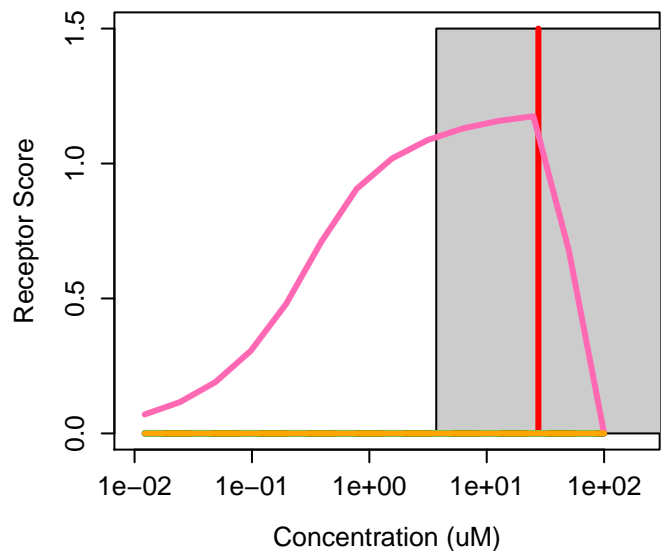

135-20-6 : Cupferron

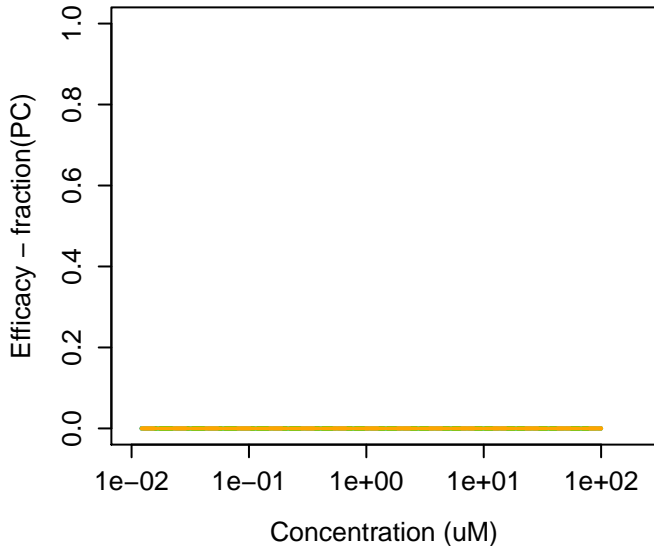

135-20-6 : Cupferron  
Agonist: 0 Antagonist: 0



135410-20-7 : Acetamiprid



135410-20-7 : Acetamiprid  
Agonist: 0 Antagonist: 0



136042-19-8 : FR130739

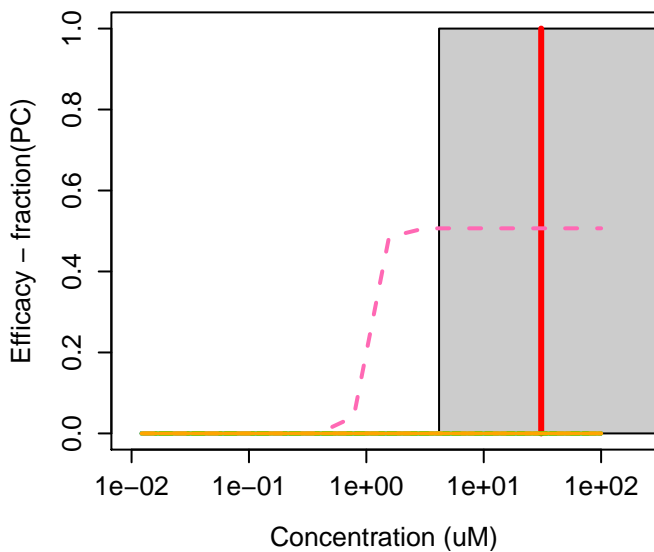

136042-19-8 : FR130739  
Agonist: 0 Antagonist: 0

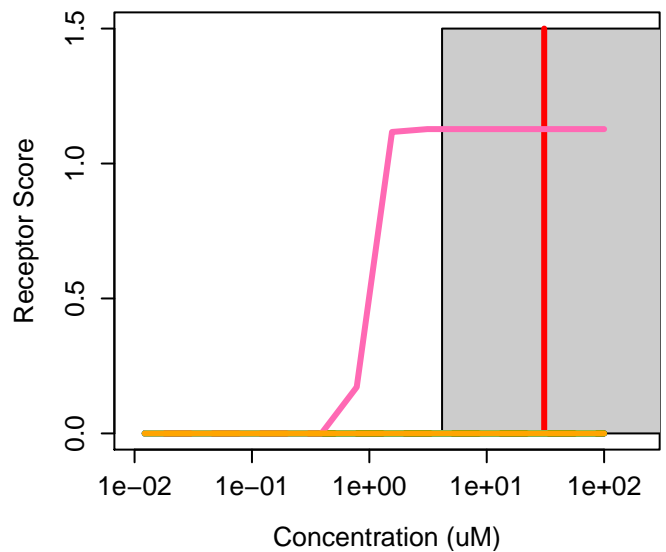

136-45-8 : Dipropyl 2,5-pyridinedicarboxylate



136-45-8 : Dipropyl 2,5-pyridinedicarboxylate  
Agonist: 0 Antagonist: 0



136-60-7 : Butyl benzoate



136-60-7 : Butyl benzoate  
Agonist: 0 Antagonist: 0



13674-84-5 : Tris(2-chloroisopropyl)phosphate



13674-84-5 : Tris(2-chloroisopropyl)phosphate  
Agonist: 0 Antagonist: 0



13674-87-8 : TDCPP

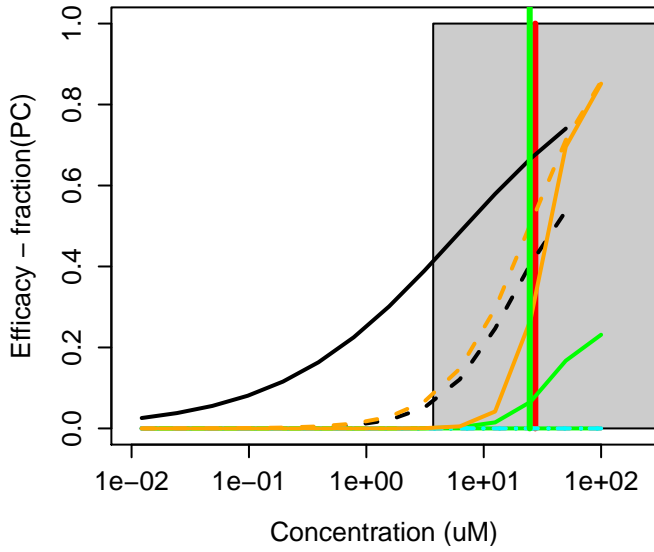

13674-87-8 : TDCPP  
Agonist: 0 Antagonist: 0.29

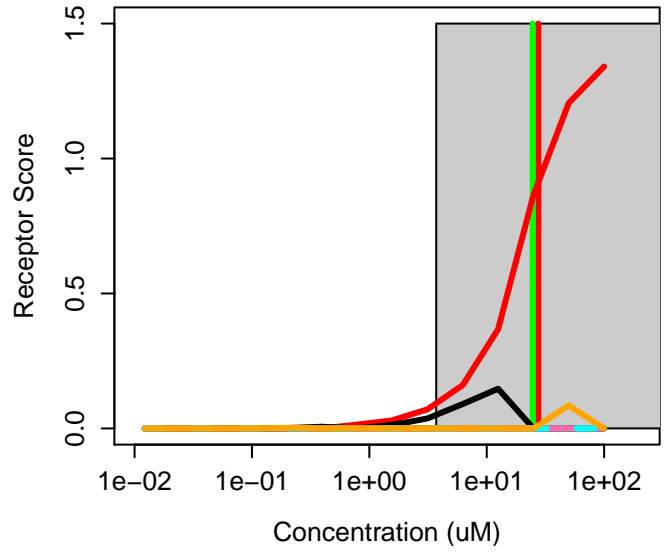

136-77-6 : 4-Hexylresorcinol

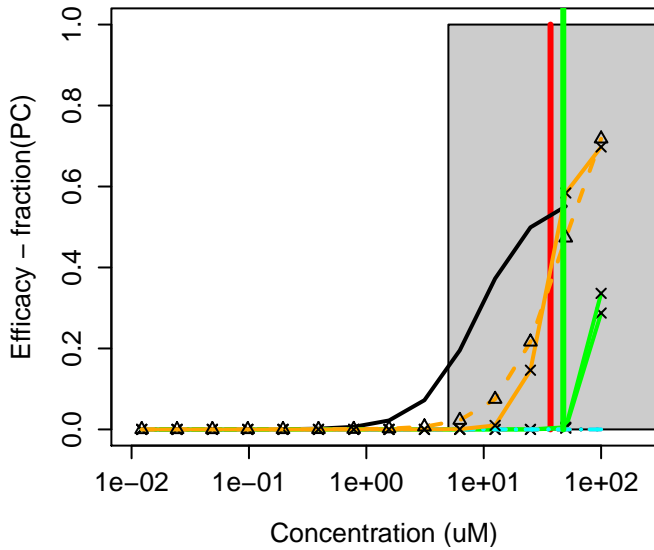

136-77-6 : 4-Hexylresorcinol  
Agonist: 0 Antagonist: 0.13

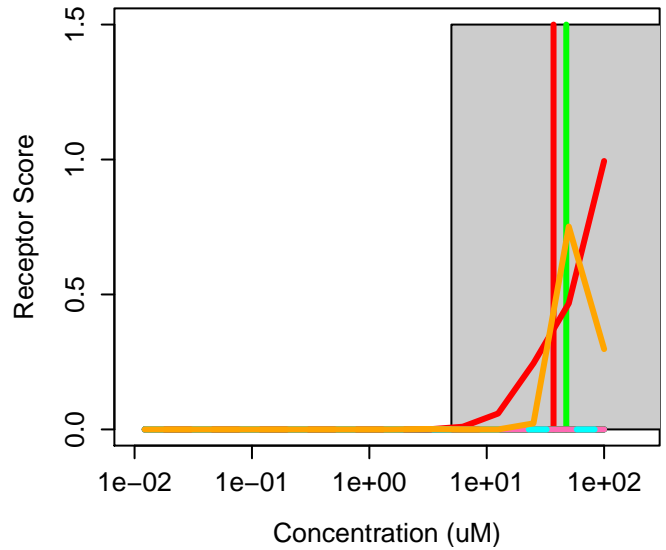

13680-35-8 : 4,4'-Methylenebis(2,6-diethylaniline)

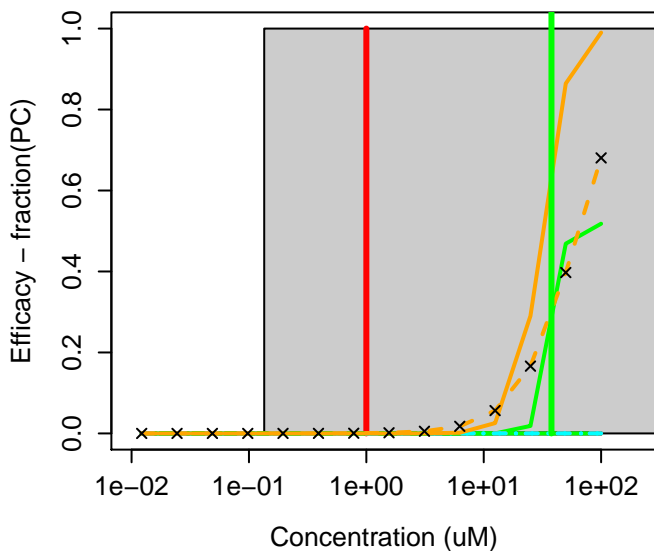

13680-35-8 : 4,4'-Methylenebis(2,6-diethylaniline)  
Agonist: 0 Antagonist: 0.06

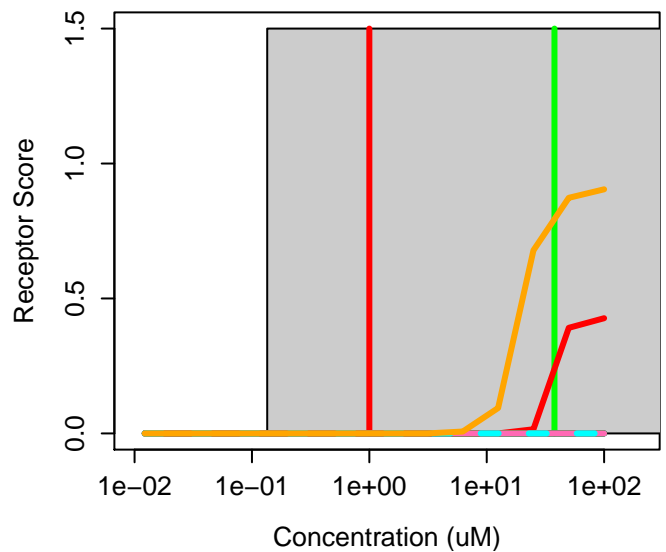

13684-56-5 : Desmedipham

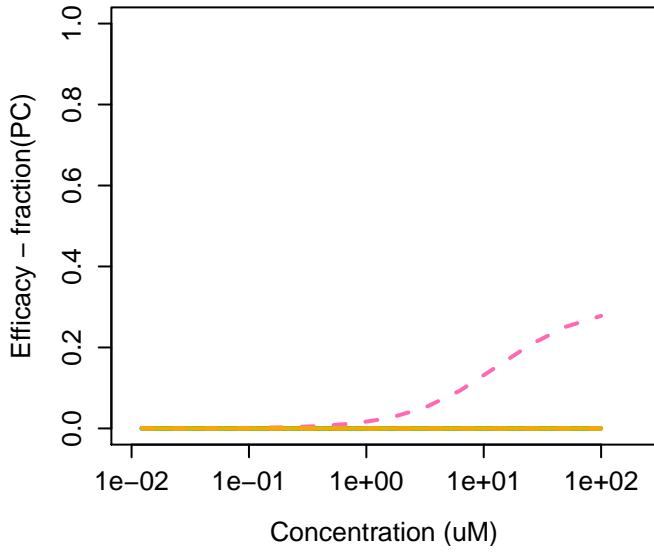

13684-56-5 : Desmedipham  
Agonist: 0 Antagonist: 0

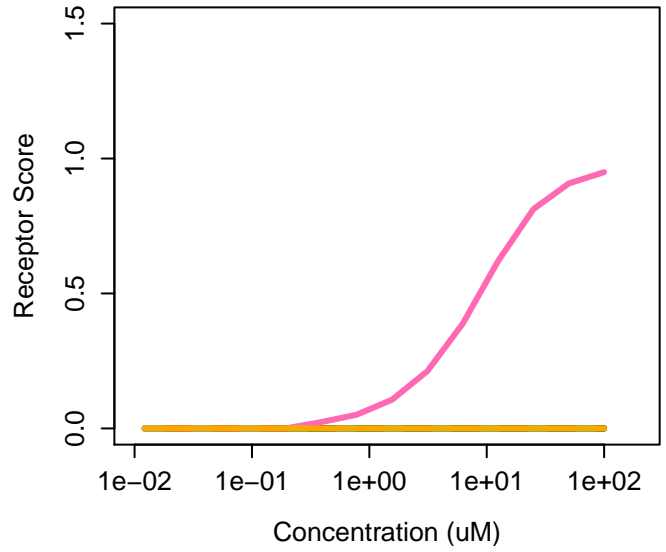

13684-63-4 : Phenmedipham

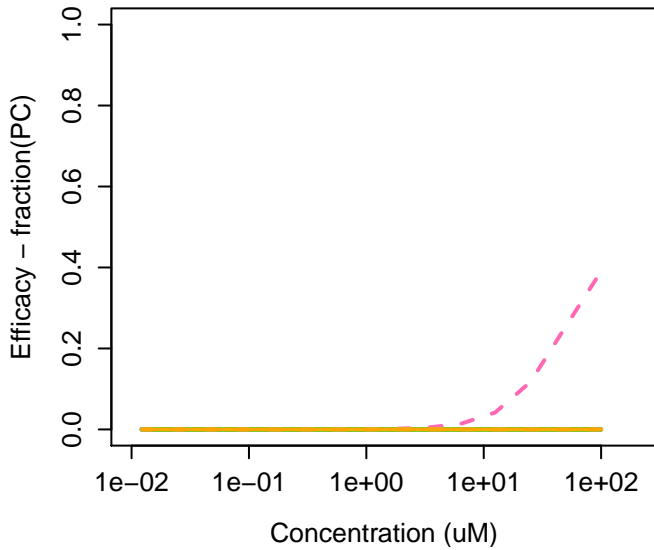

13684-63-4 : Phenmedipham  
Agonist: 0 Antagonist: 0

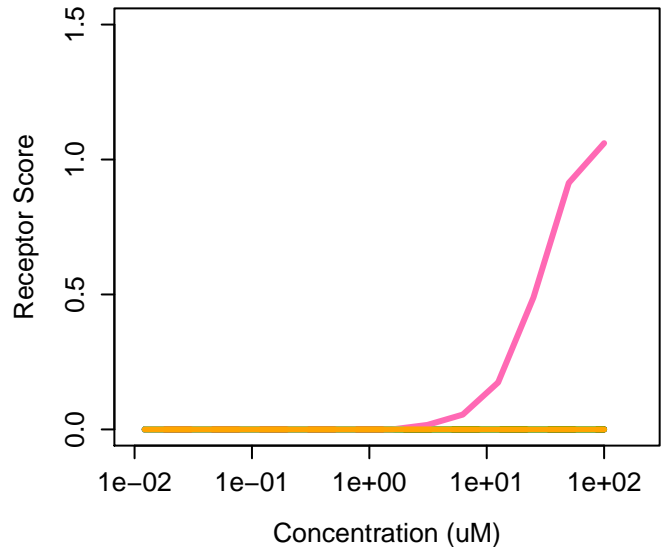

137-26-8 : Thiram

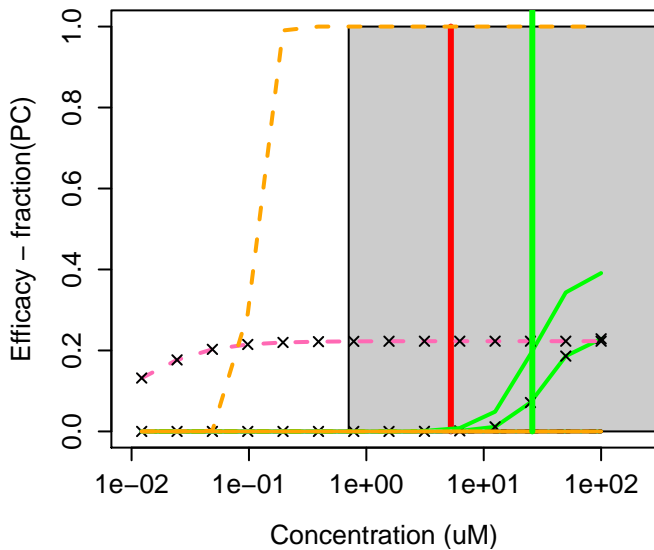

137-26-8 : Thiram  
Agonist: 0 Antagonist: 0.073

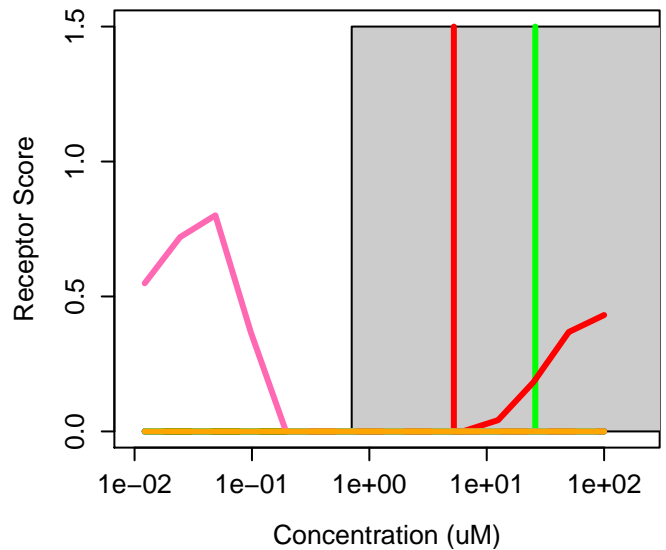

137-30-4 : Ziram

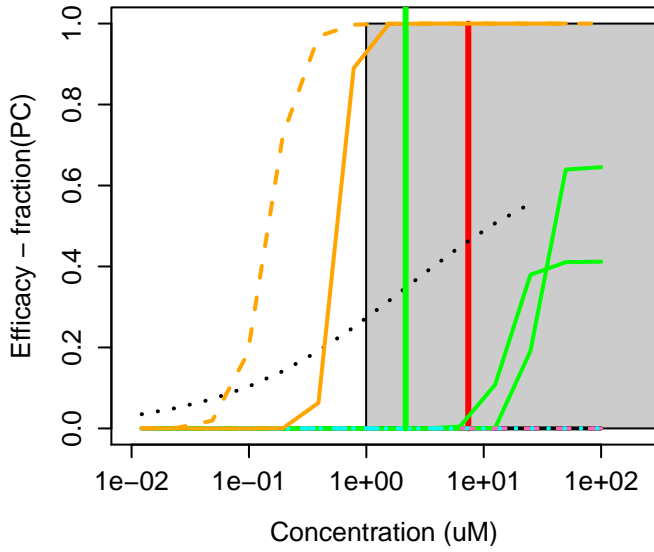

137-30-4 : Ziram  
Agonist: 0 Antagonist: 0.4

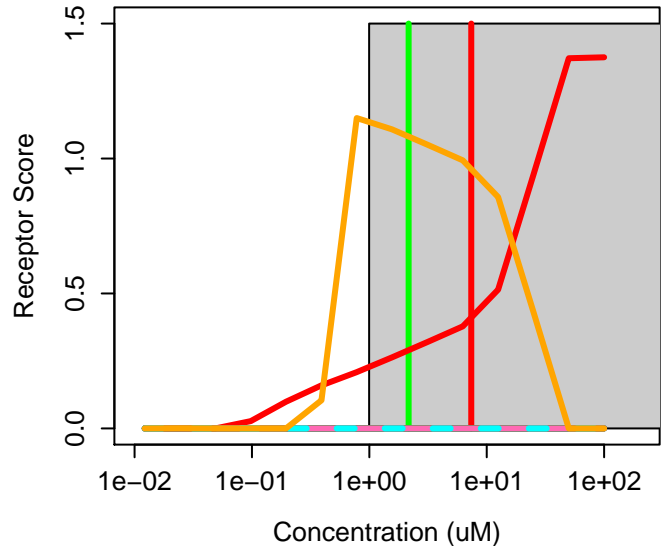

137-42-8 : Metam-sodium

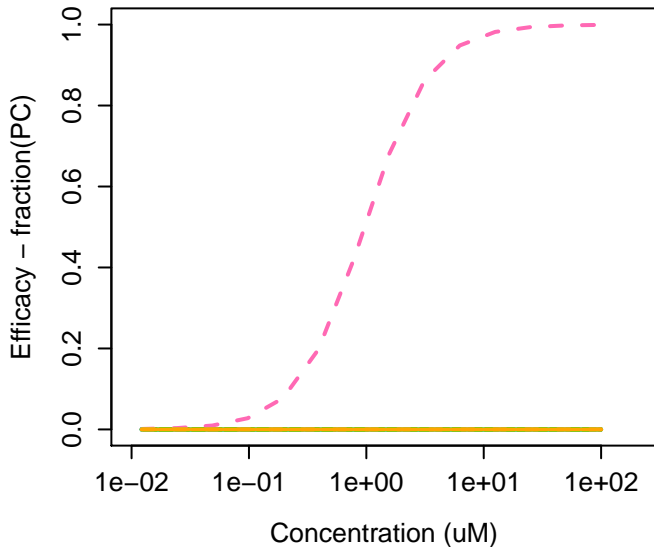

137-42-8 : Metam-sodium  
Agonist: 0 Antagonist: 0

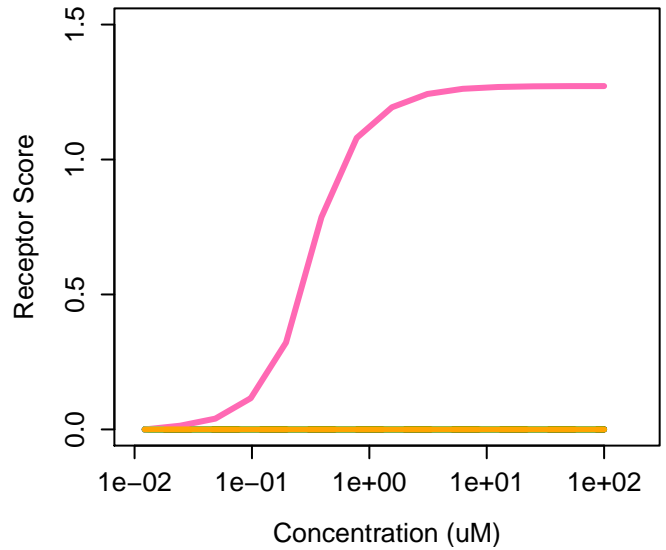

13755-29-8 : Sodium tetrafluoroborate



13755-29-8 : Sodium tetrafluoroborate  
Agonist: 0 Antagonist: 0



**137-66-6 : Ascorbyl palmitate**

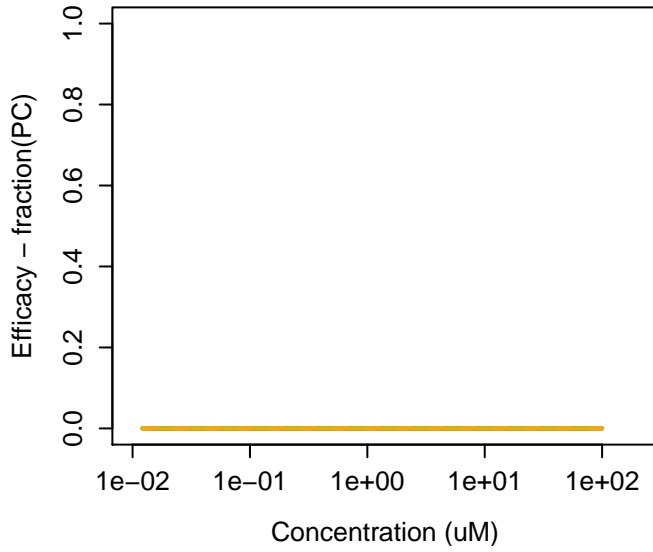

**137-66-6 : Ascorbyl palmitate  
Agonist: 0 Antagonist: 0**



**138-22-7 : Butyl lactate**



**138-22-7 : Butyl lactate  
Agonist: 0 Antagonist: 0**



**138261-41-3 : Imidacloprid**

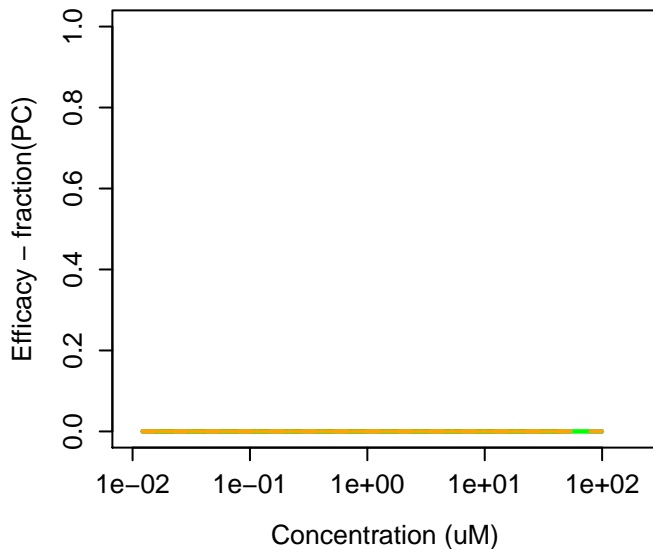

**138261-41-3 : Imidacloprid  
Agonist: 0 Antagonist: 0**



13826-35-2 : 3-Phenoxybenzenemethanol

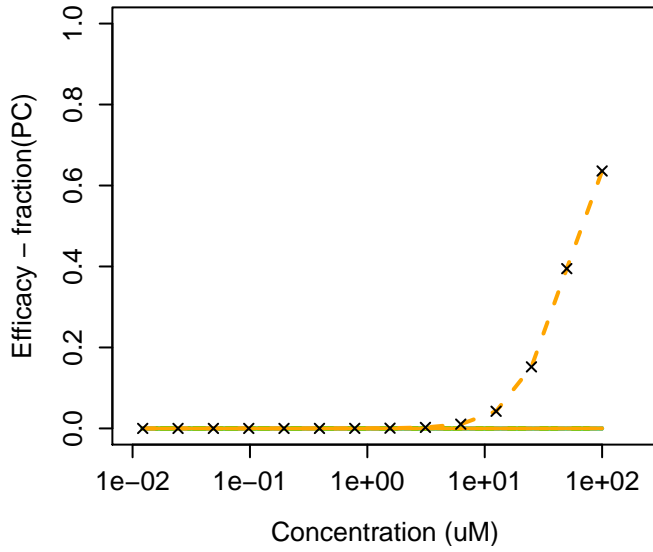

13826-35-2 : 3-Phenoxybenzenemethanol  
Agonist: 0 Antagonist: 0



138472-01-2 : FR900409

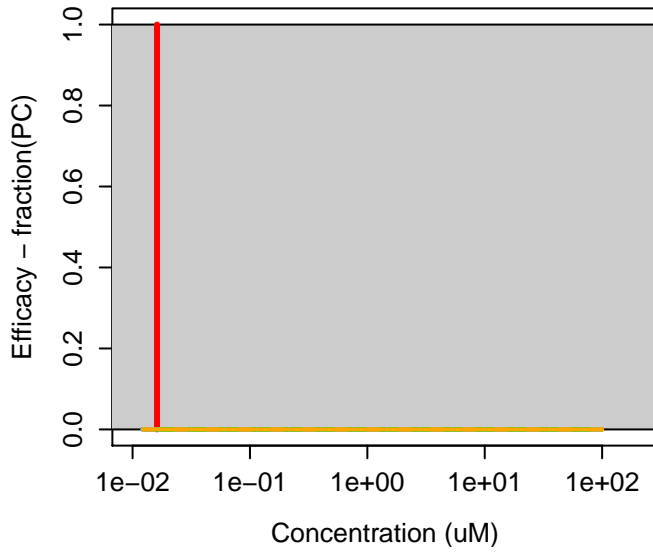

138472-01-2 : FR900409  
Agonist: 0 Antagonist: 0

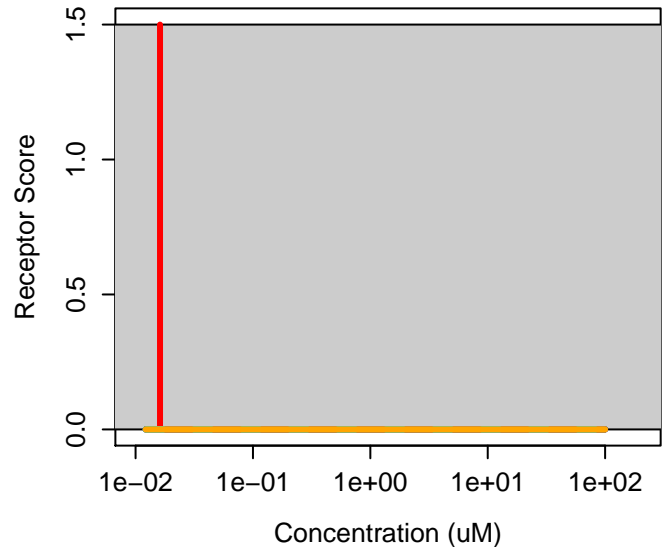

138-86-3 : Limonene

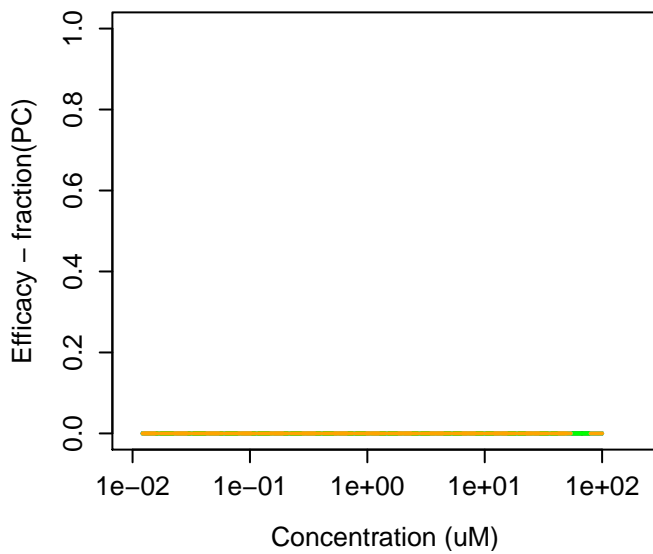

138-86-3 : Limonene  
Agonist: 0 Antagonist: 0

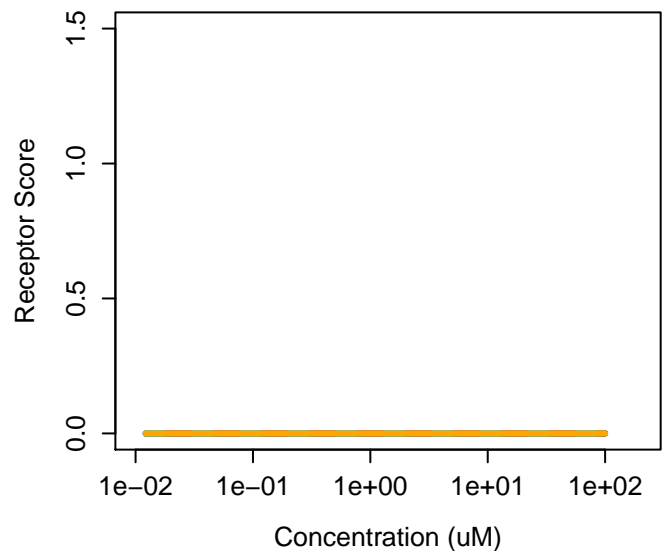



139-02-6 : Sodium phenolate



139-02-6 : Sodium phenolate  
Agonist: 0 Antagonist: 0



139-13-9 : Nitriлотriacetic acid

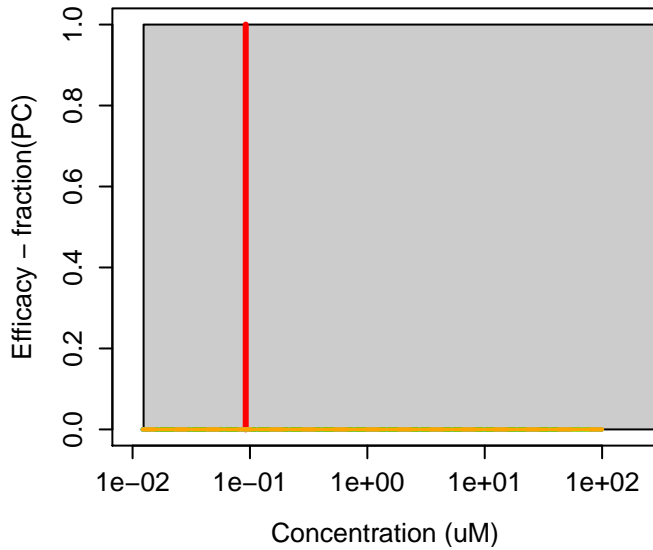

139-13-9 : Nitriлотriacetic acid  
Agonist: 0 Antagonist: 0

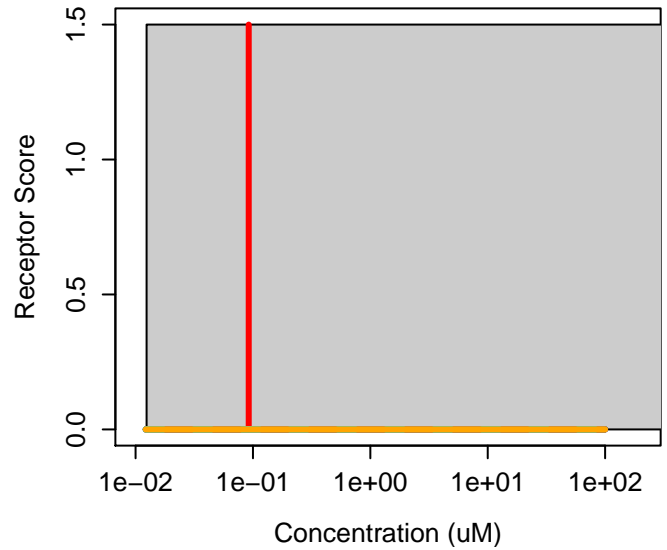

139149-55-6 : SB202235

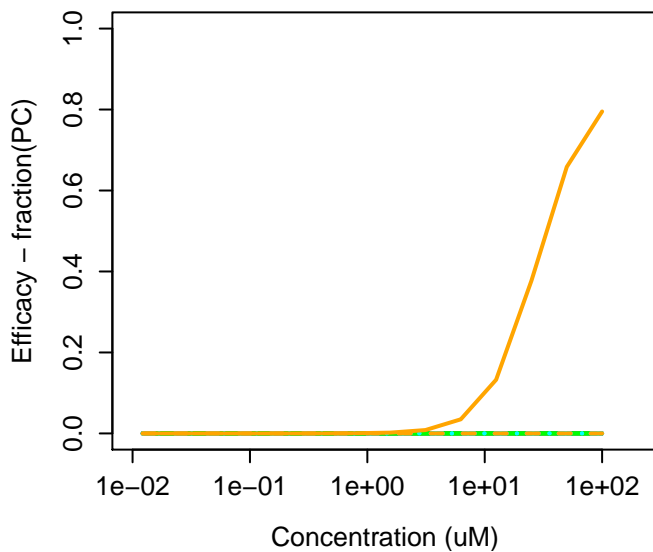

139149-55-6 : SB202235  
Agonist: 0 Antagonist: 0

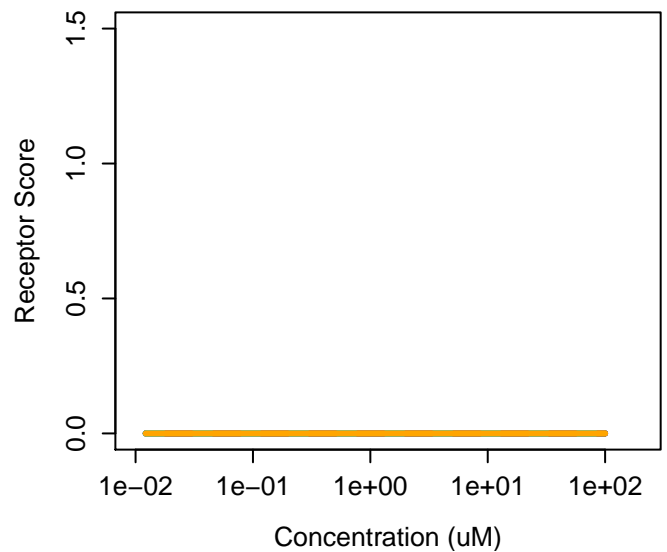

139290-65-6 : Volinanserin

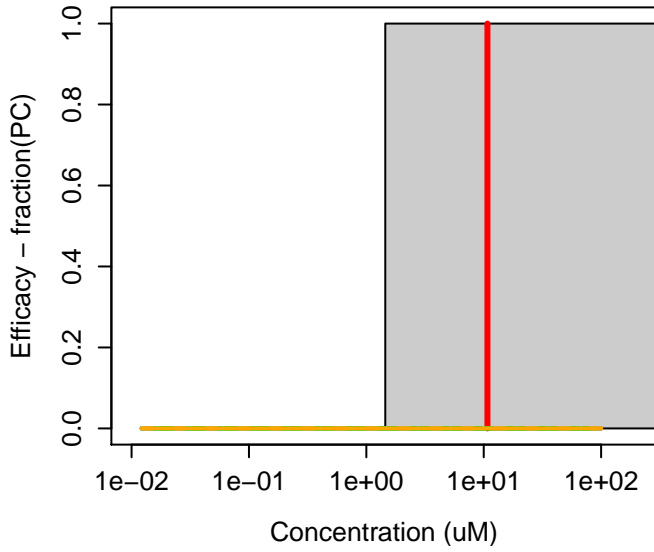

139290-65-6 : Volinanserin  
Agonist: 0 Antagonist: 0

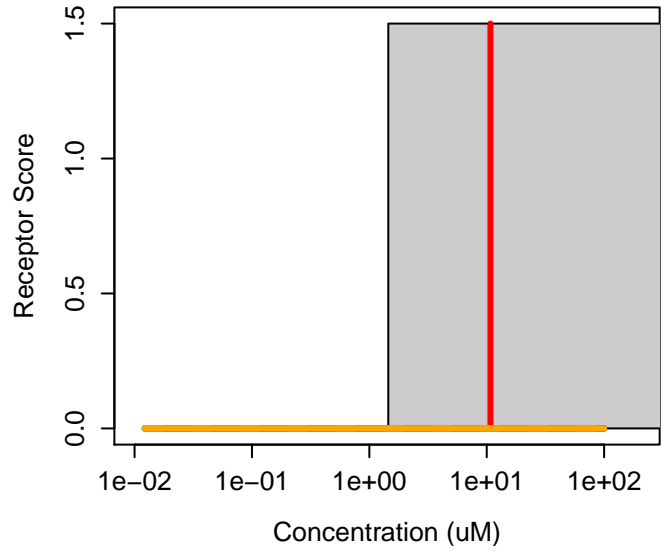

139340-56-0 : Darbufelone mesylate

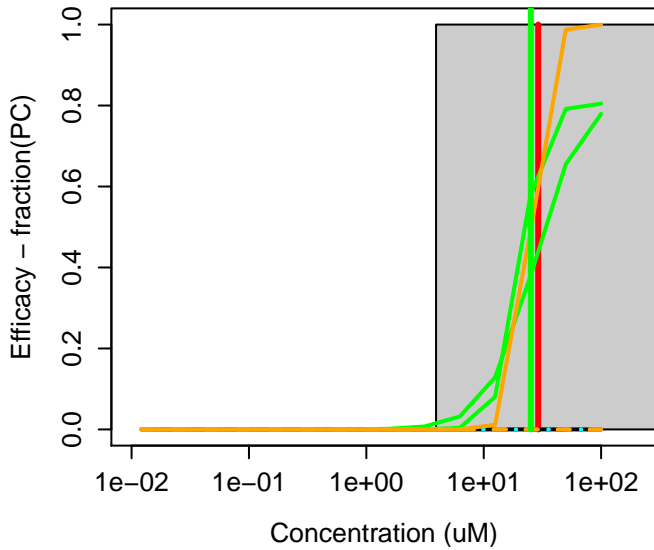

139340-56-0 : Darbufelone mesylate  
Agonist: 0 Antagonist: 0.15

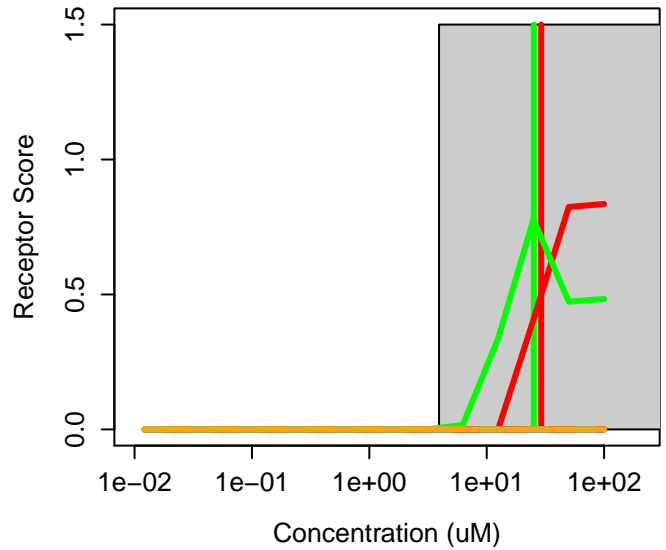

139-40-2 : Propazine



139-40-2 : Propazine  
Agonist: 0 Antagonist: 0



139-87-7 : Ethyl diethanolamine



139-87-7 : Ethyl diethanolamine  
Agonist: 0 Antagonist: 0



9-88-8 : 7-Ethyl-2-methyl-4-undecanolsulfate, sodi9-88-8 : 7-Ethyl-2-methyl-4-undecanolsulfate, sodi  
Agonist: 0 Antagonist: 0

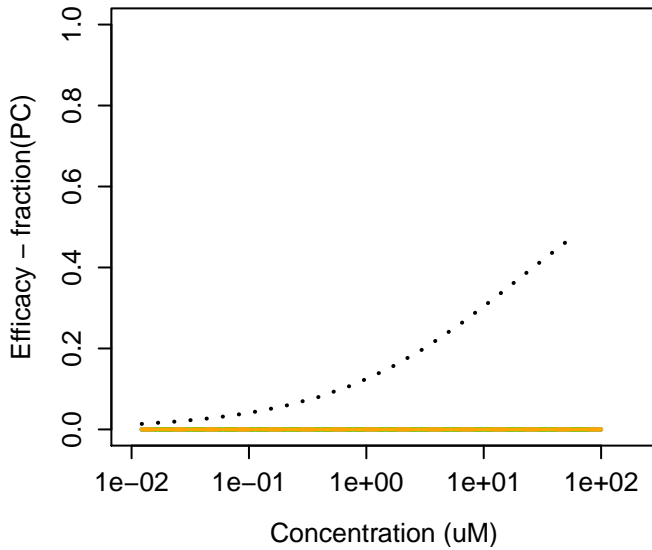

139-96-8 : Dodecyl sulfate triethanolamine

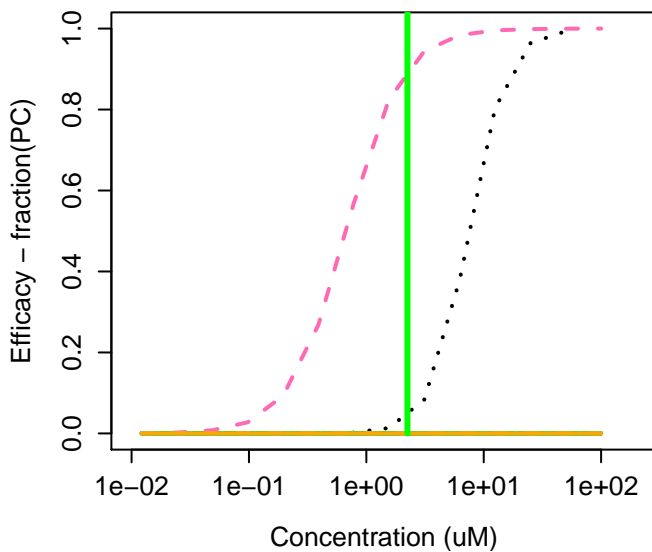

139-96-8 : Dodecyl sulfate triethanolamine  
Agonist: 0.15 Antagonist: 0

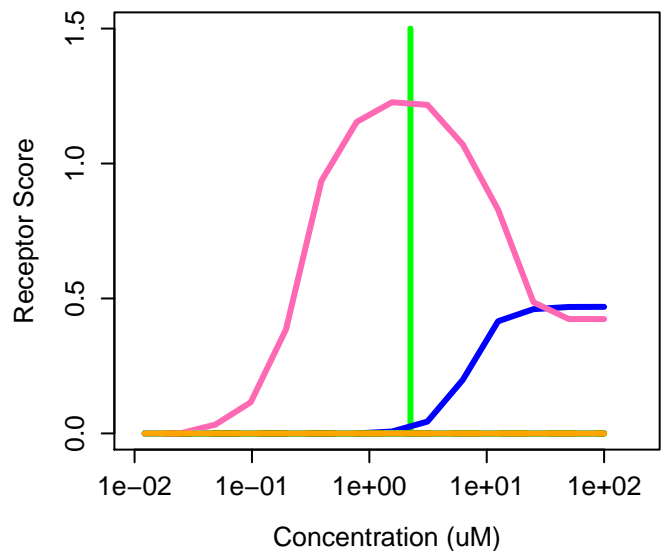

140-08-9 : Tris(2-chloroethyl) phosphite



140-08-9 : Tris(2-chloroethyl) phosphite  
Agonist: 0 Antagonist: 0



140-10-3 : E-Cinnamic acid

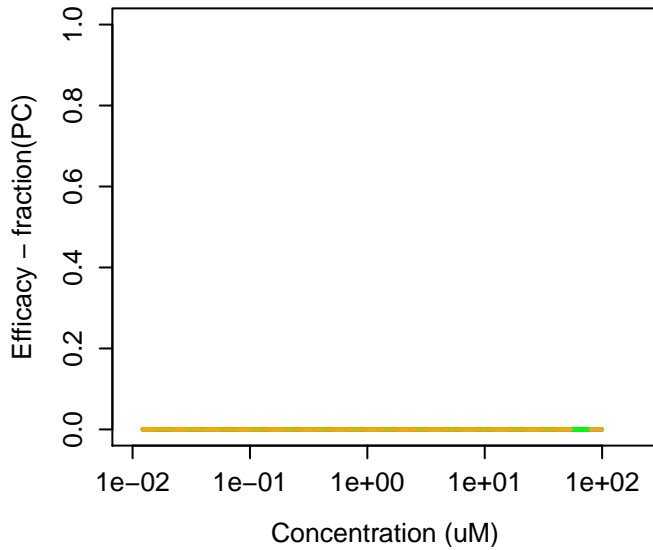

140-10-3 : E-Cinnamic acid  
Agonist: 0 Antagonist: 0



140-11-4 : Benzyl acetate



140-11-4 : Benzyl acetate  
Agonist: 0 Antagonist: 0



1401-55-4 : Tannic acid

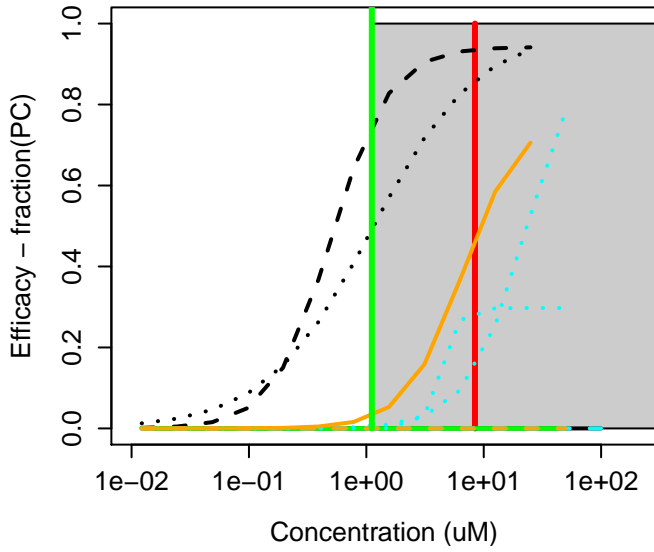

1401-55-4 : Tannic acid  
Agonist: 0.15 Antagonist: 0.047

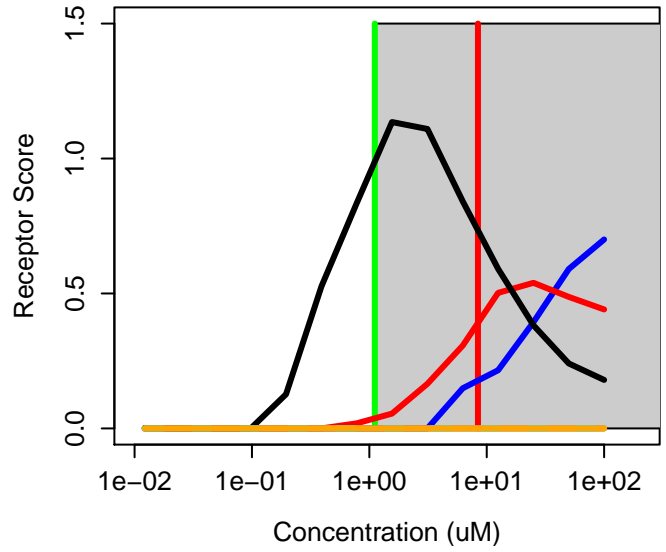

140-31-8 : 1-(2-Aminoethyl)piperazine



140-31-8 : 1-(2-Aminoethyl)piperazine  
Agonist: 0 Antagonist: 0



140-38-5 : 4-Chlorophenylurea

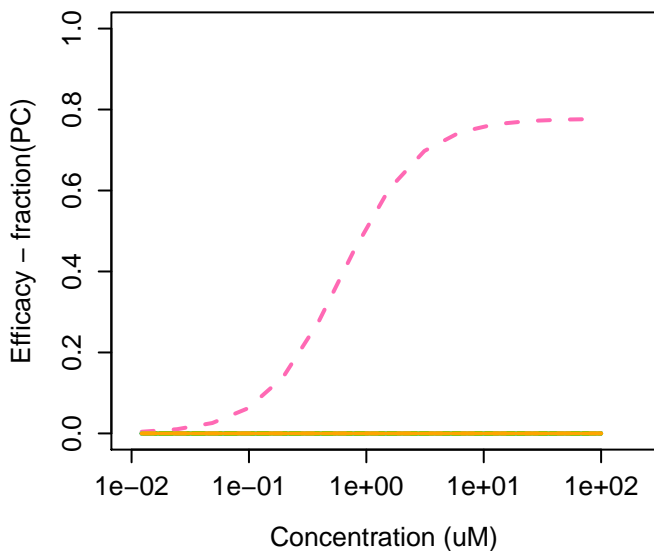

140-38-5 : 4-Chlorophenylurea  
Agonist: 0 Antagonist: 0

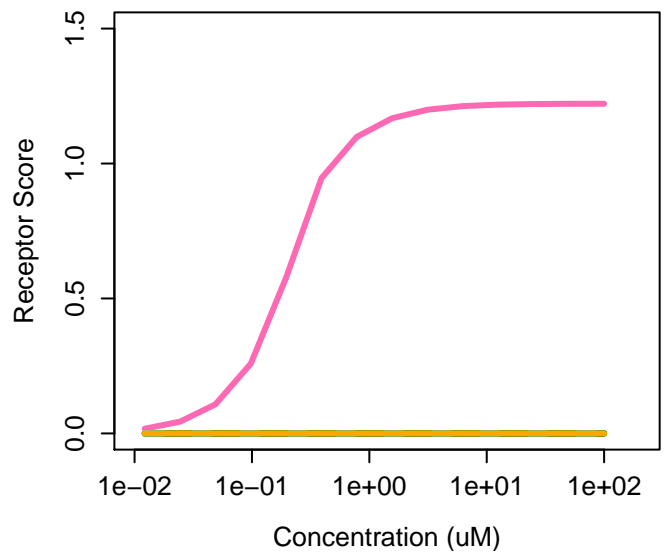

140-56-7 : Fenaminosulf

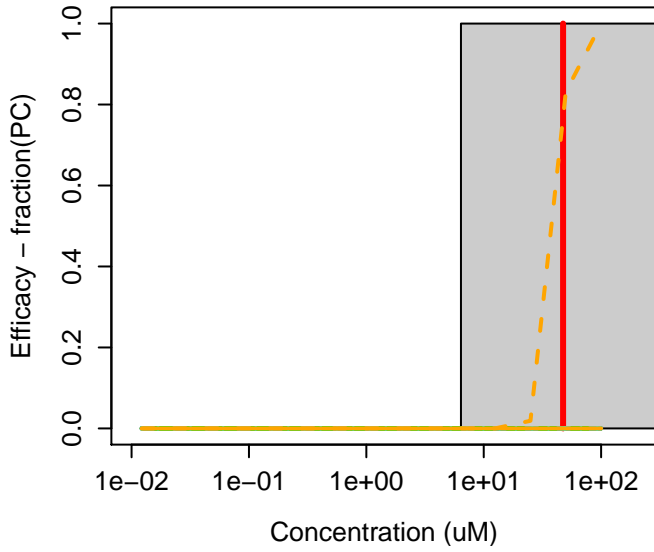

140-56-7 : Fenaminosulf  
Agonist: 0 Antagonist: 0

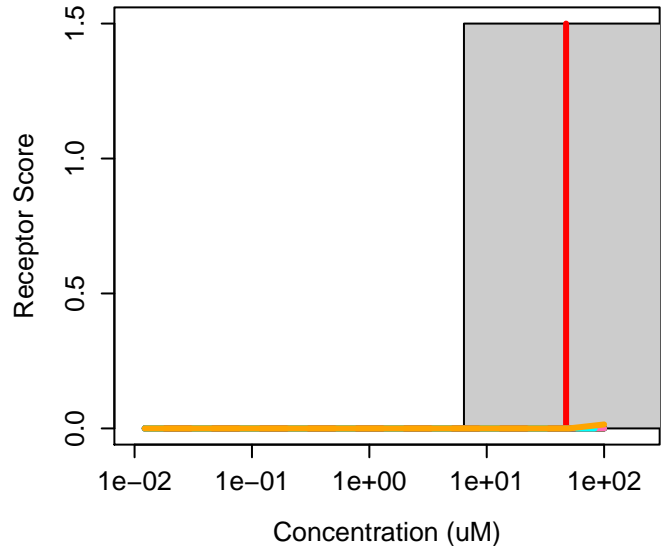

140-64-7 : Pentamidine isethionate

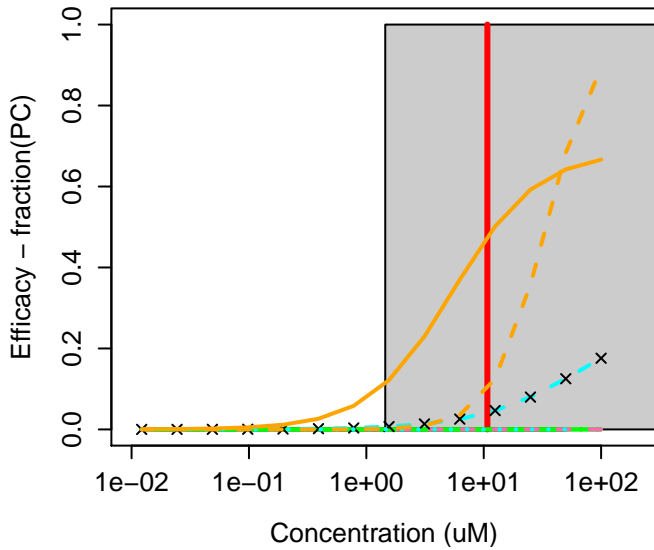

140-64-7 : Pentamidine isethionate  
Agonist: 0 Antagonist: 0

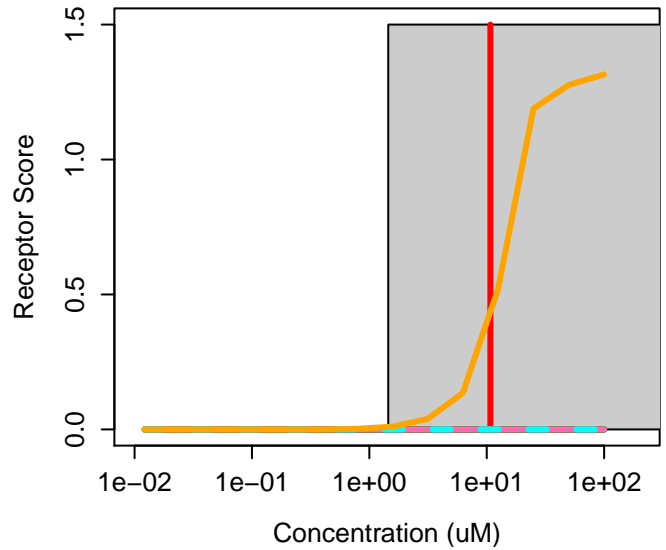

140-66-9 : 4-(1,1,3,3-Tetramethylbutyl)phenol

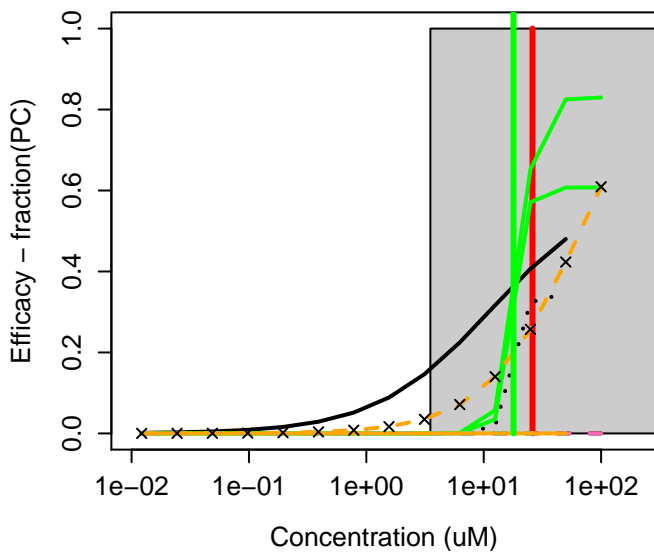

140-66-9 : 4-(1,1,3,3-Tetramethylbutyl)phenol  
Agonist: 0.0035 Antagonist: 0.23

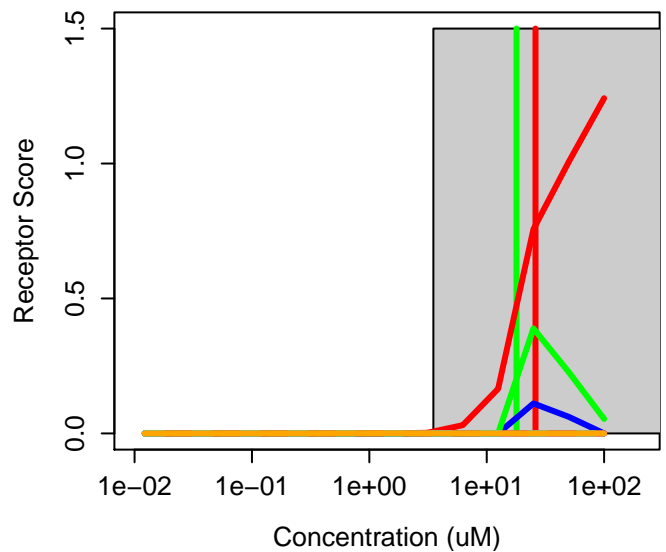

**140-67-0 : Estragole**



**140-67-0 : Estragole  
Agonist: 0 Antagonist: 0**



**140-95-4 : Dimethylolurea**



**140-95-4 : Dimethylolurea  
Agonist: 0 Antagonist: 0**



**141-04-8 : Diisobutyl adipate**



**141-04-8 : Diisobutyl adipate  
Agonist: 0 Antagonist: 0**



141112-29-0 : Isoxaflutole

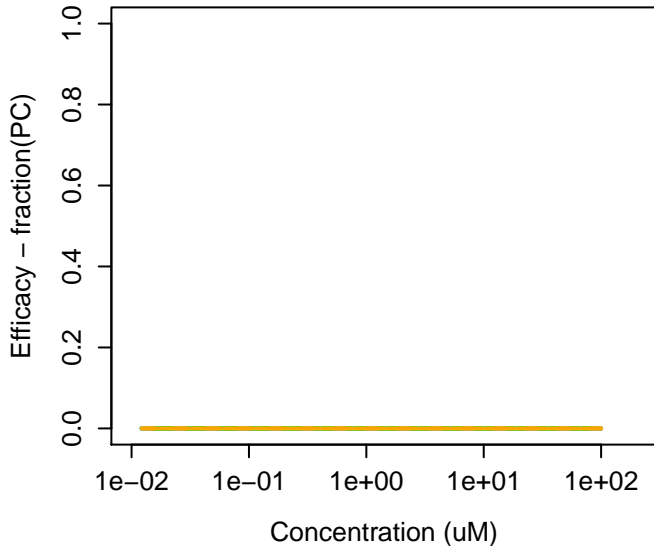

141112-29-0 : Isoxaflutole  
Agonist: 0 Antagonist: 0



141-22-0 : (9Z,12R)-12-Hydroxyoctadec-9-enoic acid  
Agonist: 0 Antagonist: 0

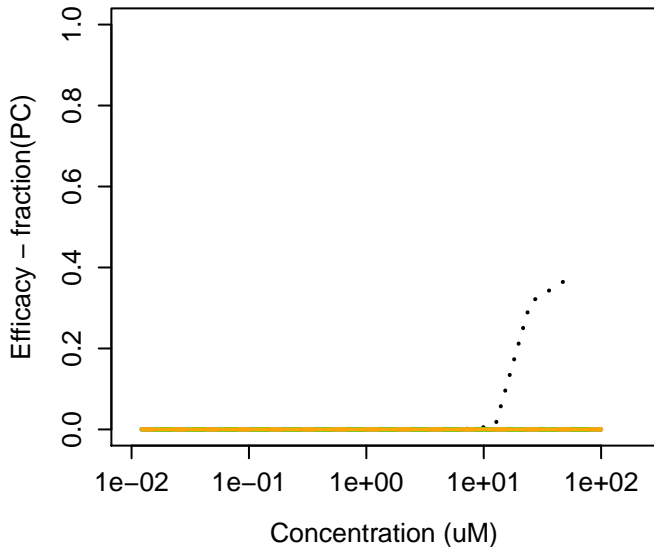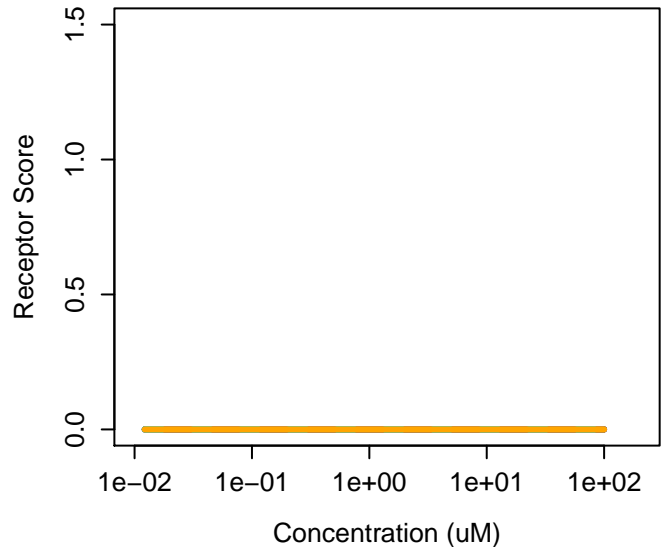

141-32-2 : Butyl acrylate

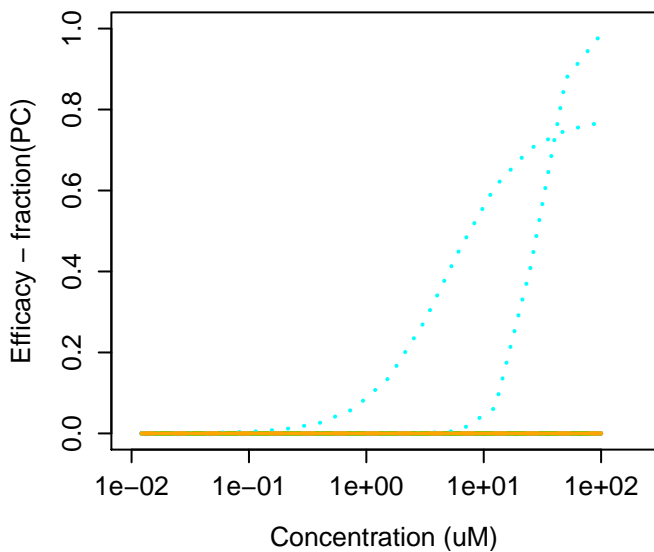

141-32-2 : Butyl acrylate  
Agonist: 0 Antagonist: 0

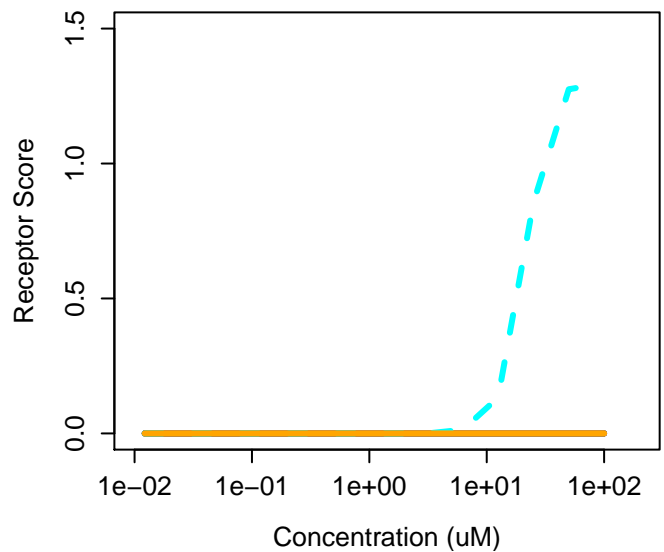



141-43-5 : Ethanolamine



141-43-5 : Ethanolamine  
Agonist: 0 Antagonist: 0



141517-21-7 : Trifloxystrobin

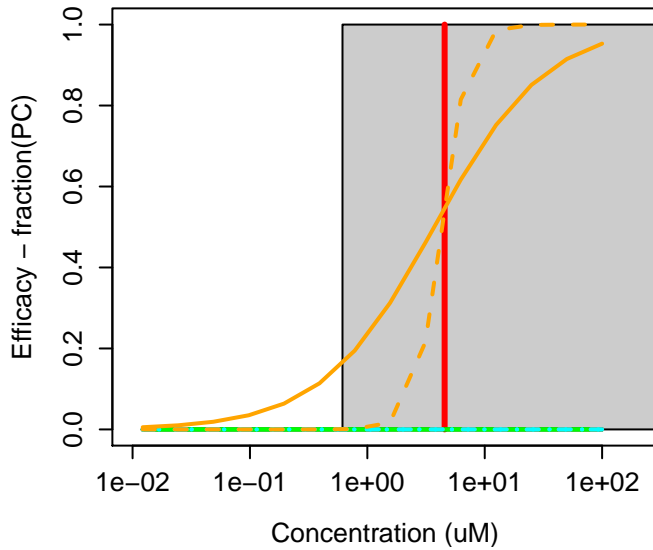

141517-21-7 : Trifloxystrobin  
Agonist: 0 Antagonist: 0.00022

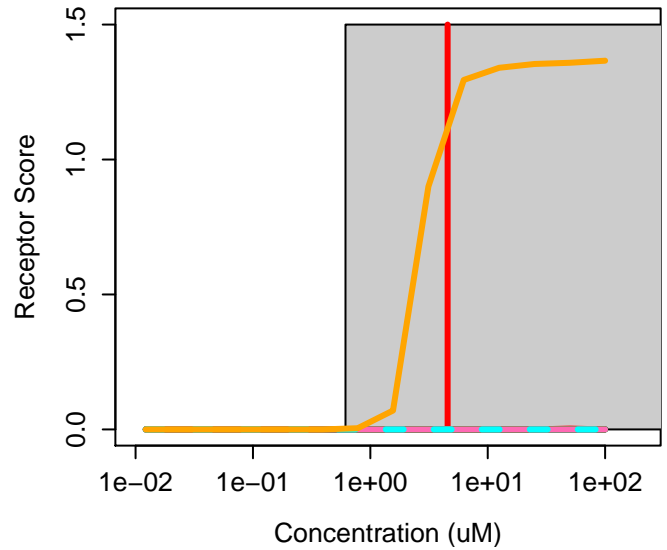

141-66-2 : Dicrotophos



141-66-2 : Dicrotophos  
Agonist: 0 Antagonist: 0



141-79-7 : 4-Methylpent-3-en-2-one



141-79-7 : 4-Methylpent-3-en-2-one  
Agonist: 0 Antagonist: 0



142-04-1 : Aniline hydrochloride



142-04-1 : Aniline hydrochloride  
Agonist: 0 Antagonist: 0



142-16-5 : Bis(2-ethylhexyl) maleate

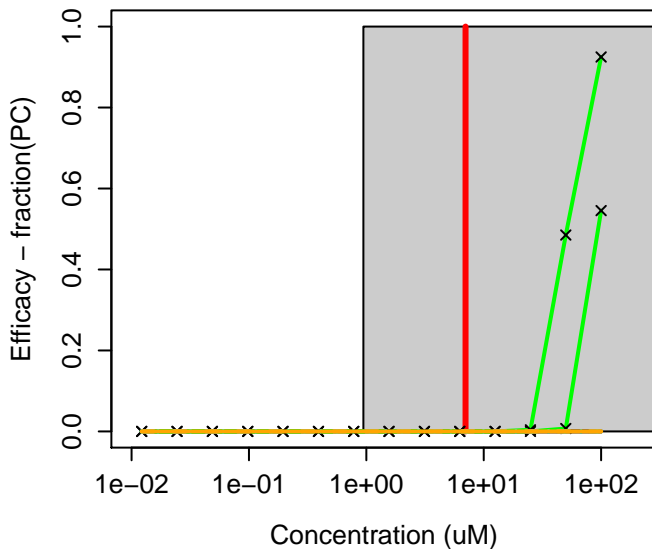

142-16-5 : Bis(2-ethylhexyl) maleate  
Agonist: 0 Antagonist: 0

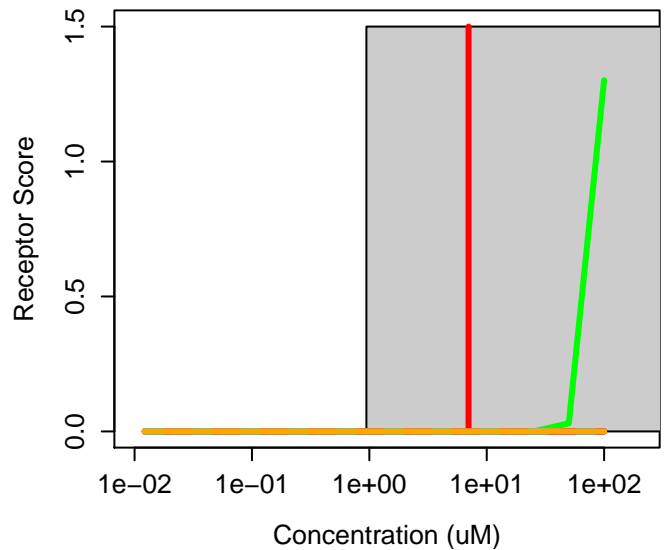

142-18-7 : 1-Monolaurin

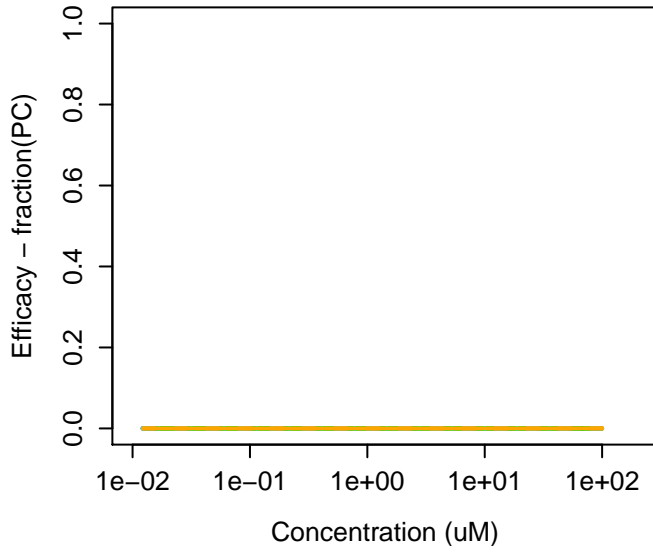

142-18-7 : 1-Monolaurin  
Agonist: 0 Antagonist: 0



142-31-4 : Sodium octyl sulfate

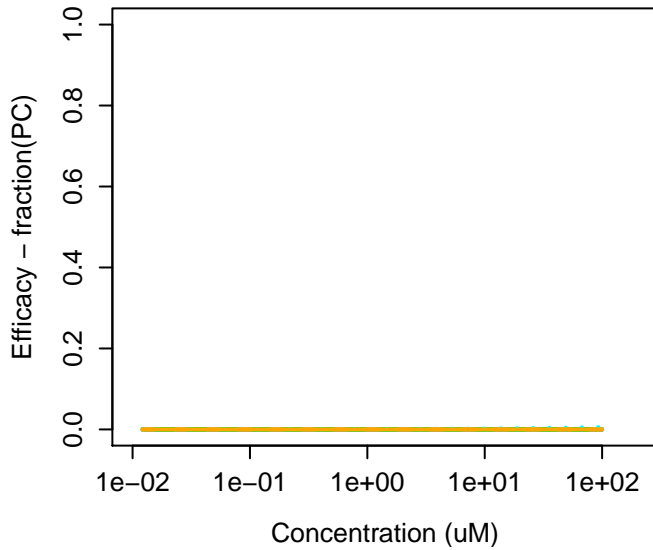

142-31-4 : Sodium octyl sulfate  
Agonist: 0 Antagonist: 0

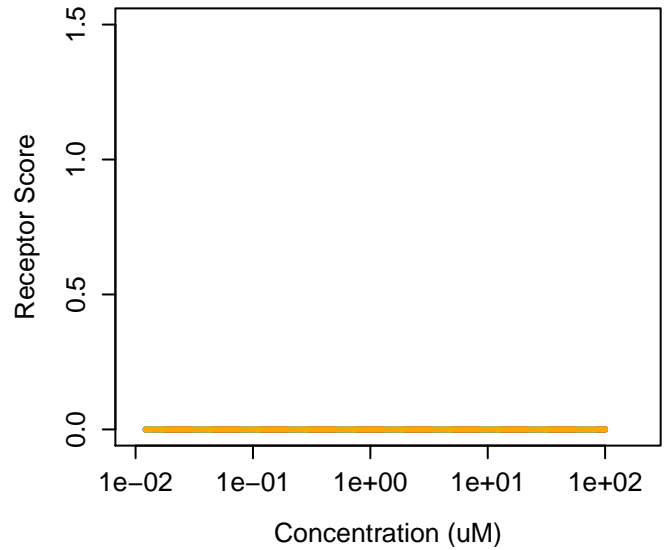

14233-37-5 : 1,4-Bis(N-isopropylamino)anthraquin



14233-37-5 : 1,4-Bis(N-isopropylamino)anthraquin  
Agonist: 0 Antagonist: 0



142459-58-3 : Flufenacet

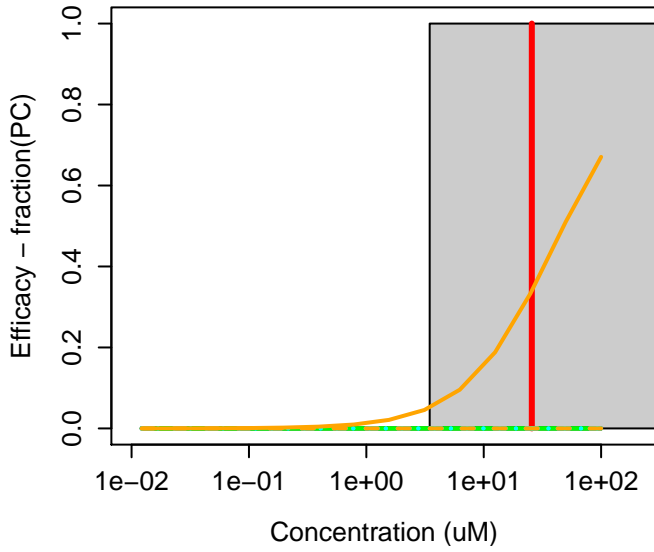

142459-58-3 : Flufenacet  
Agonist: 0 Antagonist: 0

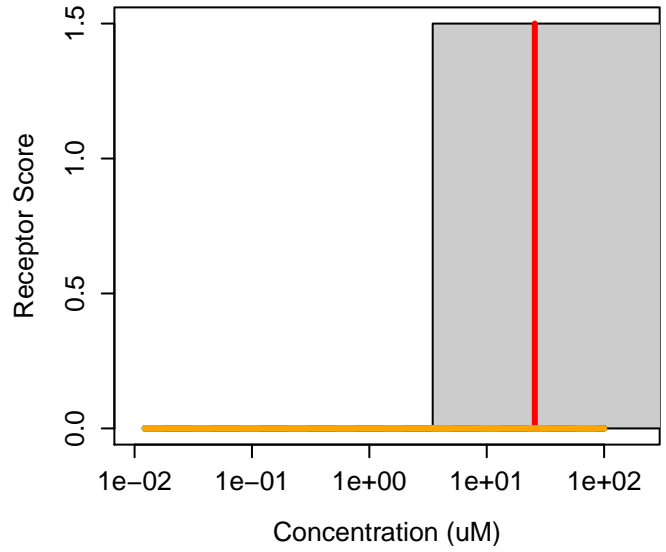

142-62-1 : Hexanoic acid



142-62-1 : Hexanoic acid  
Agonist: 0 Antagonist: 0



142-87-0 : Sodium decyl sulfate



142-87-0 : Sodium decyl sulfate  
Agonist: 0 Antagonist: 0



**143-07-7 : Dodecanoic acid**

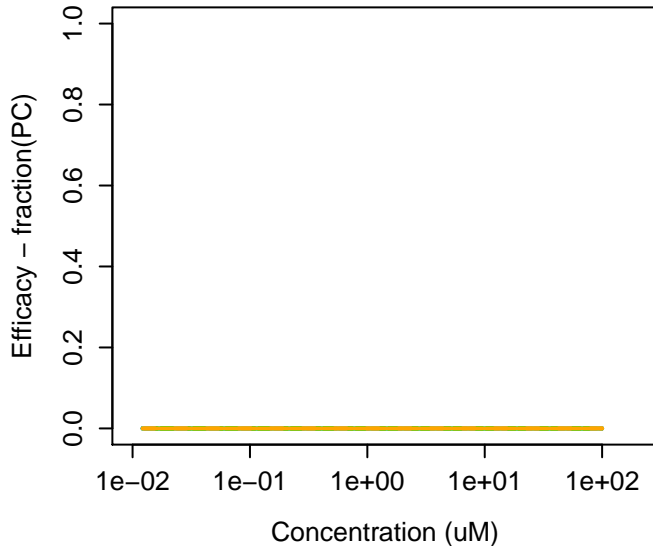

**143-07-7 : Dodecanoic acid**  
**Agonist: 0 Antagonist: 0**



**143-08-8 : 1-Nonanol**



**143-08-8 : 1-Nonanol**  
**Agonist: 0 Antagonist: 0**



**143-22-6 : 2-[2-(2-Butoxyethoxy)ethoxy]ethano**

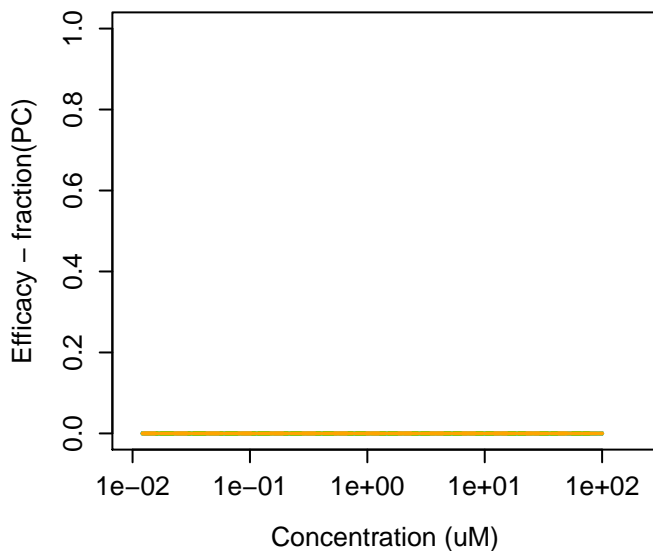

**143-22-6 : 2-[2-(2-Butoxyethoxy)ethoxy]ethano**  
**Agonist: 0 Antagonist: 0**



143390-89-0 : Kresoxim-methyl

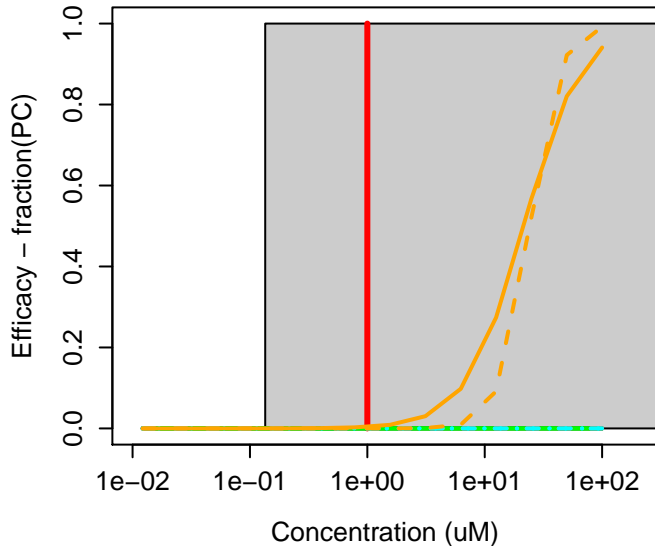

143390-89-0 : Kresoxim-methyl  
Agonist: 0 Antagonist: 0

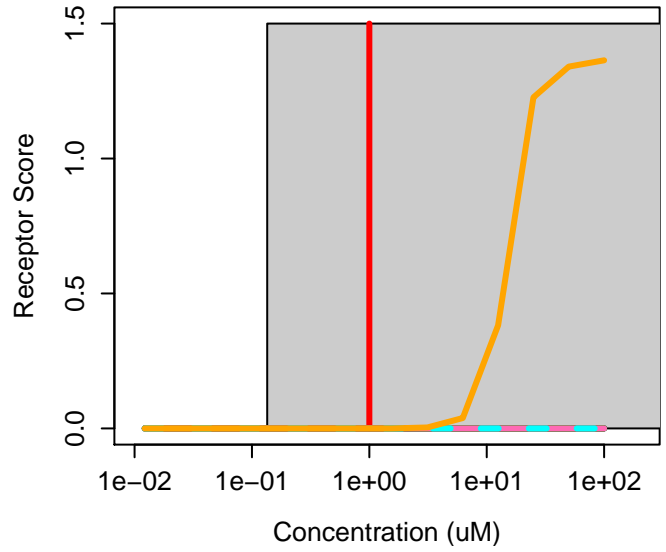

1434-54-4 : Pregnenolone carbonitrile

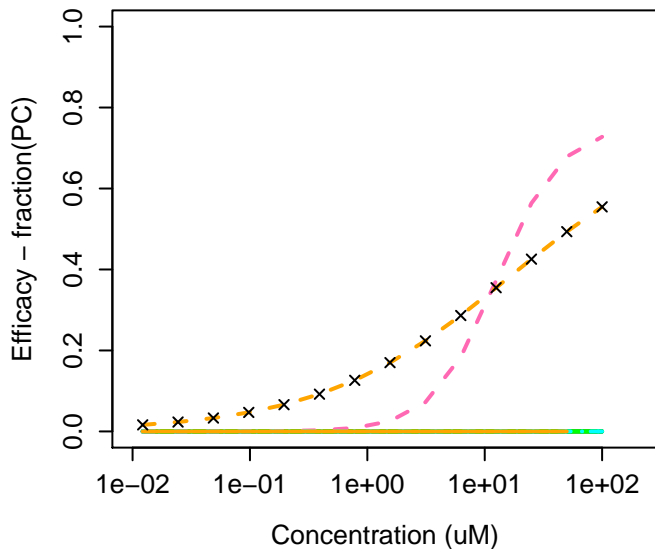

1434-54-4 : Pregnenolone carbonitrile  
Agonist: 0 Antagonist: 0

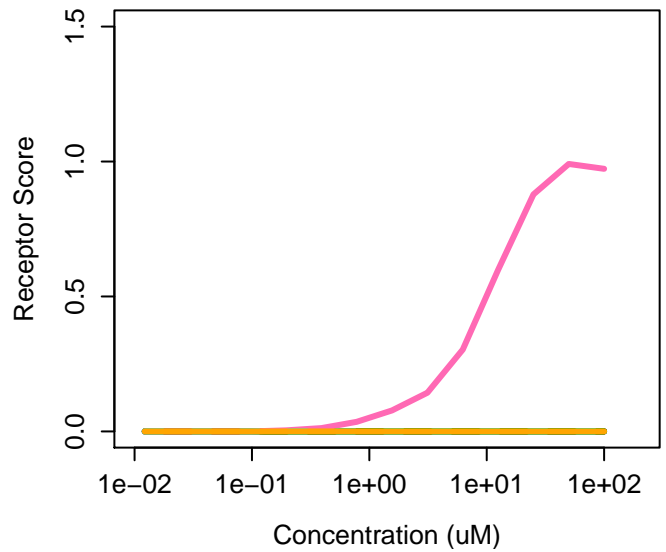

143-50-0 : Kepone

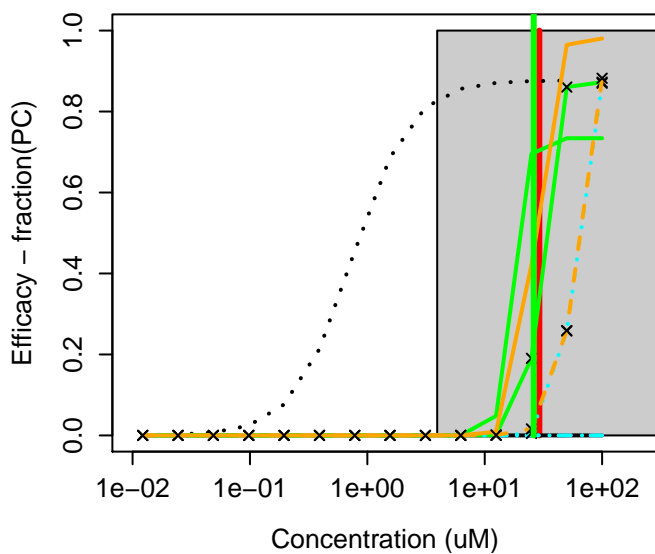

143-50-0 : Kepone  
Agonist: 0.0013 Antagonist: 0.27

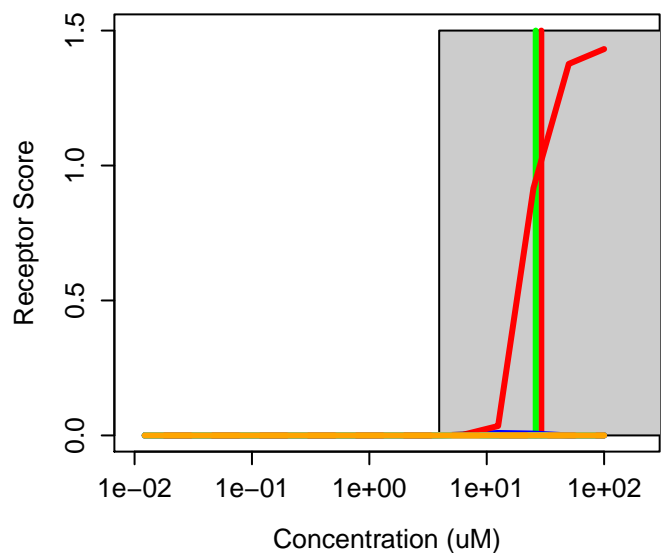

14351-66-7 : Sodium abietate

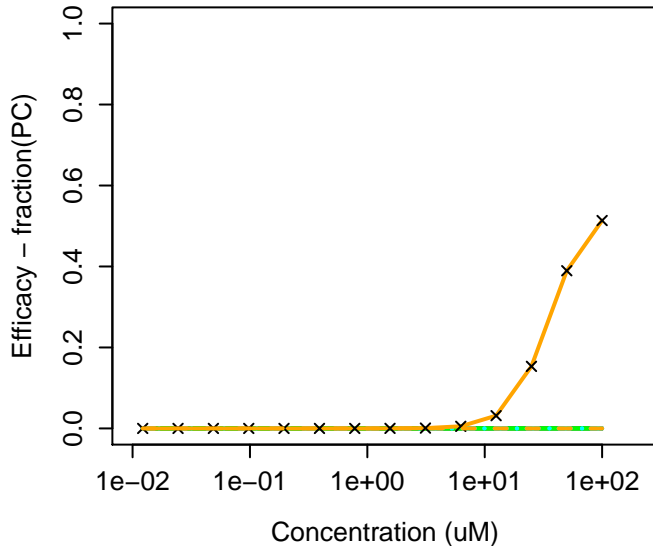

14351-66-7 : Sodium abietate  
Agonist: 0 Antagonist: 0



14371-10-9 : (2E)-3-Phenylprop-2-enal

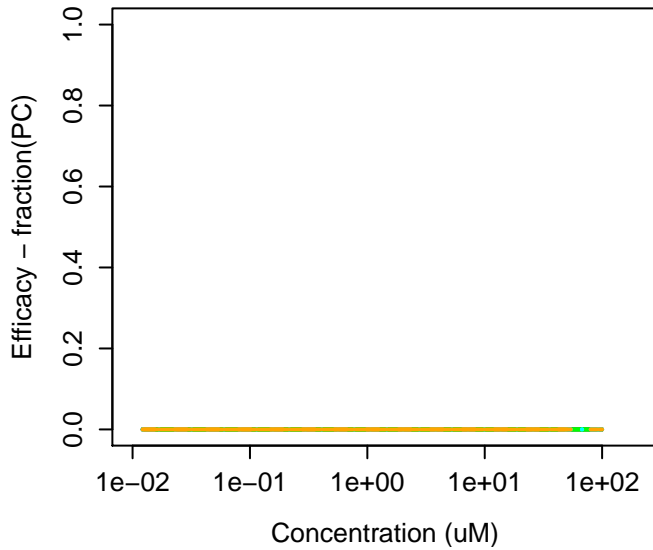

14371-10-9 : (2E)-3-Phenylprop-2-enal  
Agonist: 0 Antagonist: 0



143-74-8 : Phenol red

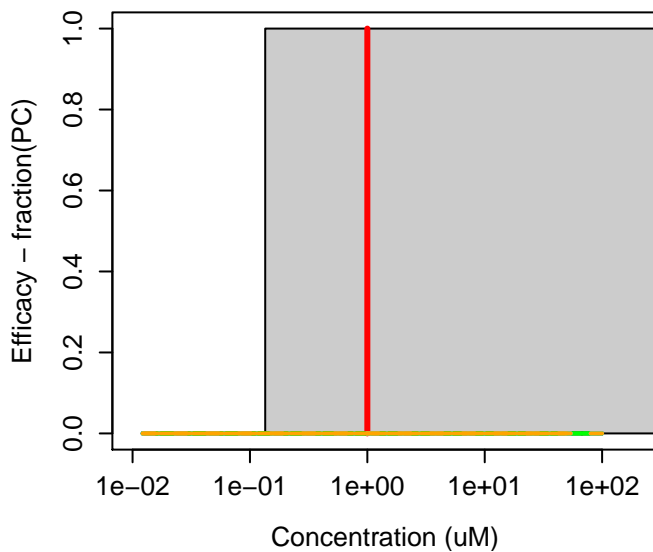

143-74-8 : Phenol red  
Agonist: 0 Antagonist: 0

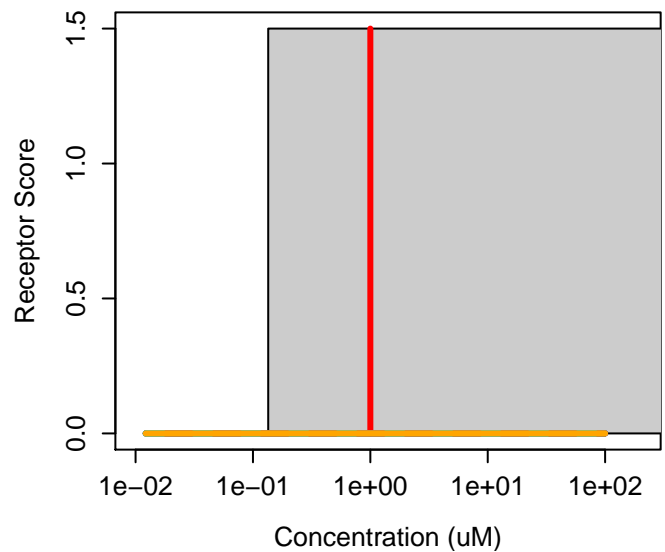

144-49-0 : Fluoroacetic acid



144-49-0 : Fluoroacetic acid  
Agonist: 0 Antagonist: 0



144550-36-7 : Iodosulfuron-methyl-sodium



144550-36-7 : Iodosulfuron-methyl-sodium  
Agonist: 0 Antagonist: 0



1445-75-6 : Diisopropyl methylphosphonate

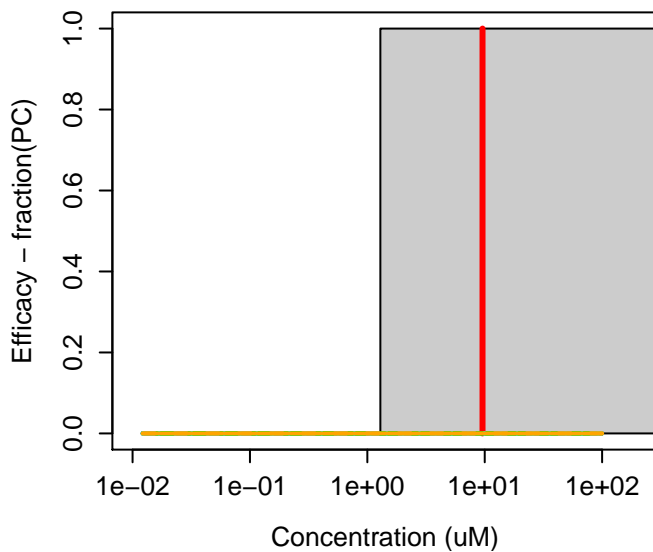

1445-75-6 : Diisopropyl methylphosphonate  
Agonist: 0 Antagonist: 0

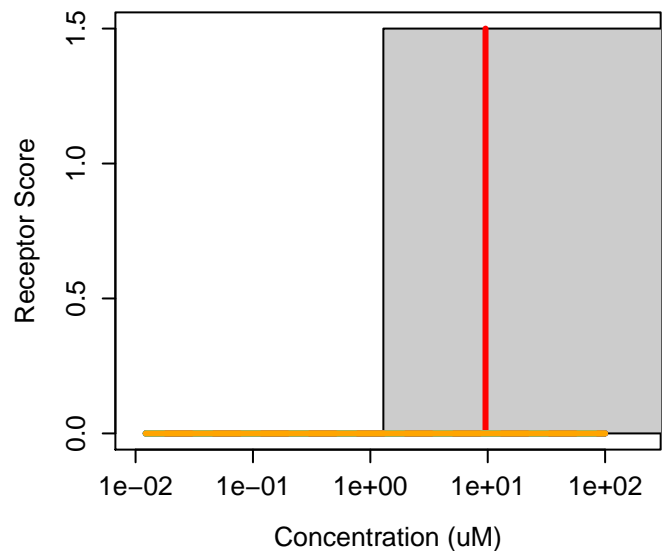



144-62-7 : Oxalic acid



144-62-7 : Oxalic acid  
Agonist: 0 Antagonist: 0



145701-21-9 : Diclosulam



145701-21-9 : Diclosulam  
Agonist: 0 Antagonist: 0



145-73-3 : Endothal

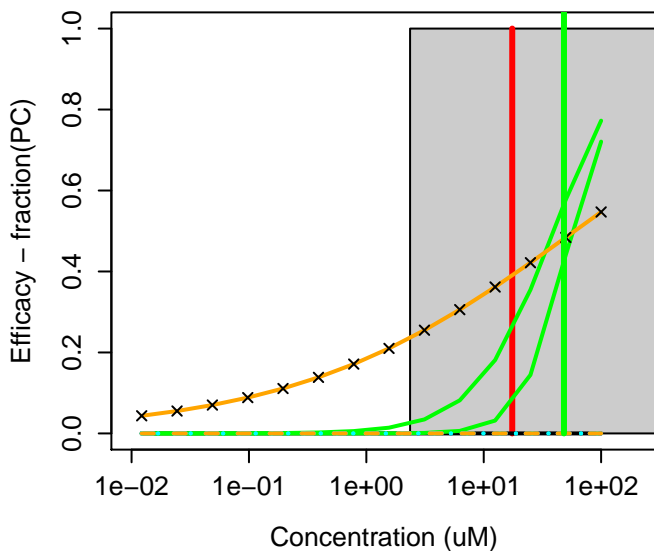

145-73-3 : Endothal  
Agonist: 0 Antagonist: 0.095

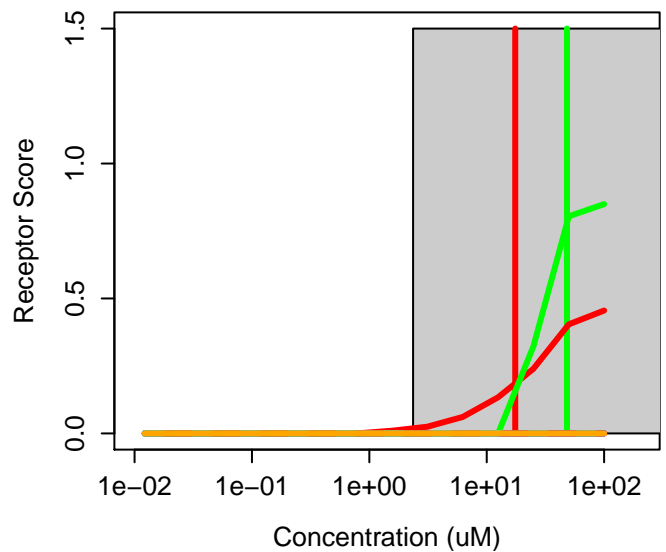

145742-28-5 : CP-122721

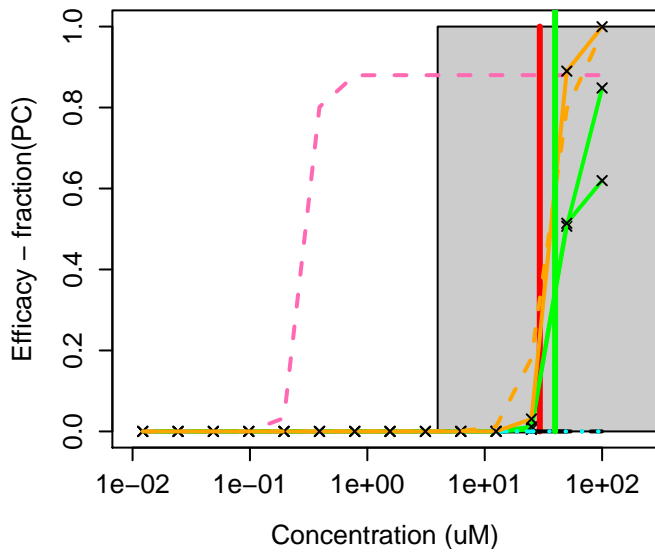

145742-28-5 : CP-122721  
Agonist: 0.00061 Antagonist: 0.15

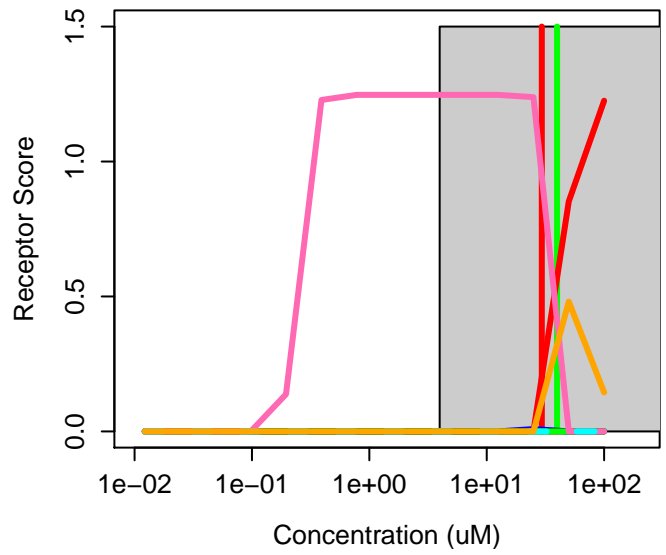

1459-93-4 : Dimethyl isophthalate

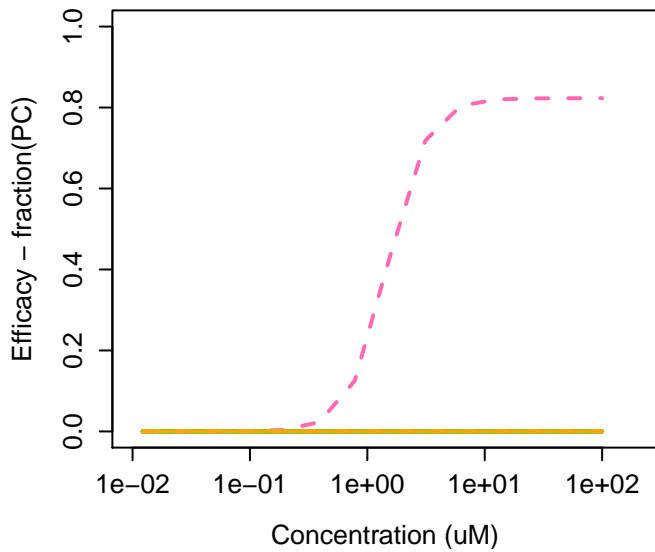

1459-93-4 : Dimethyl isophthalate  
Agonist: 0 Antagonist: 0

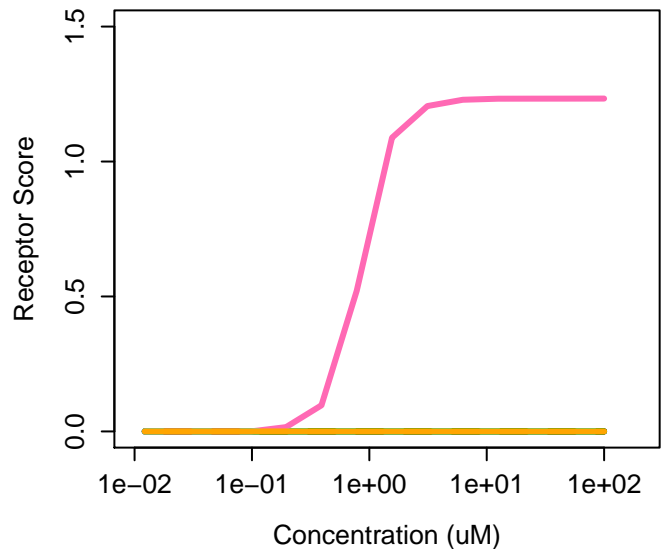

146011-65-6 : FR145237

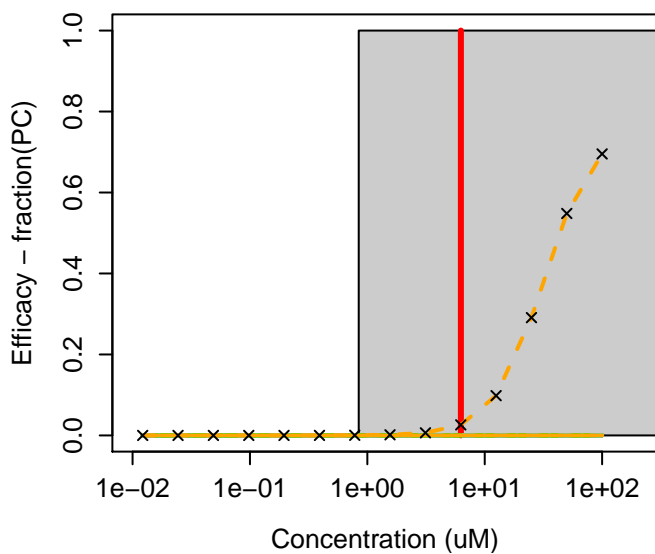

146011-65-6 : FR145237  
Agonist: 0 Antagonist: 0

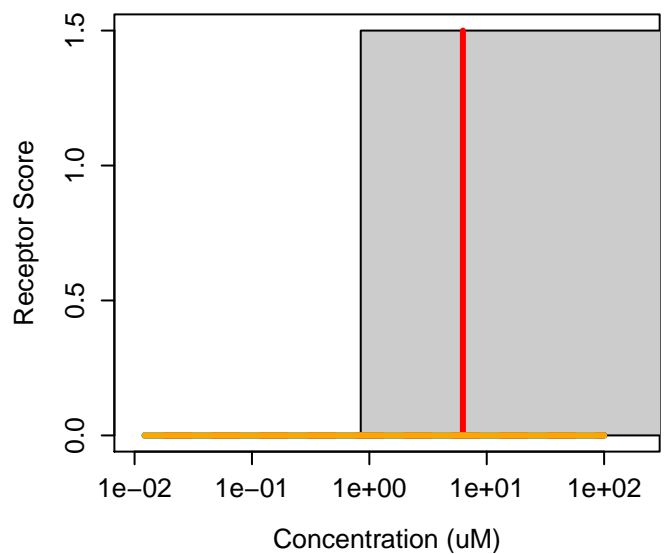

1461-22-9 : Tributyltin chloride

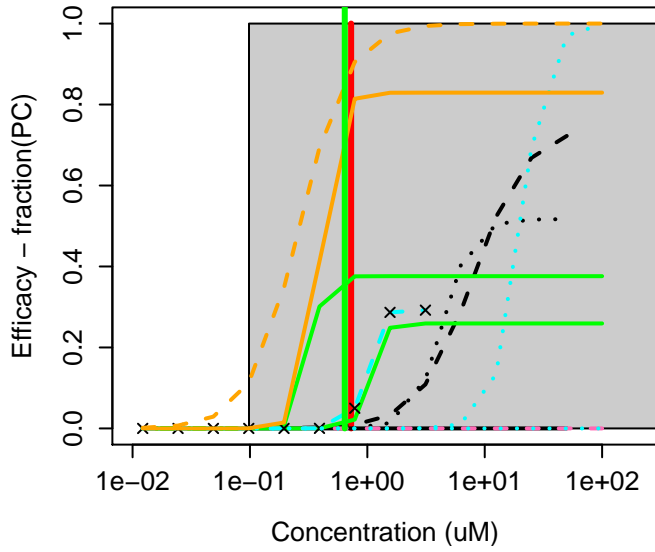

1461-22-9 : Tributyltin chloride  
Agonist: 0.011 Antagonist: 0.22

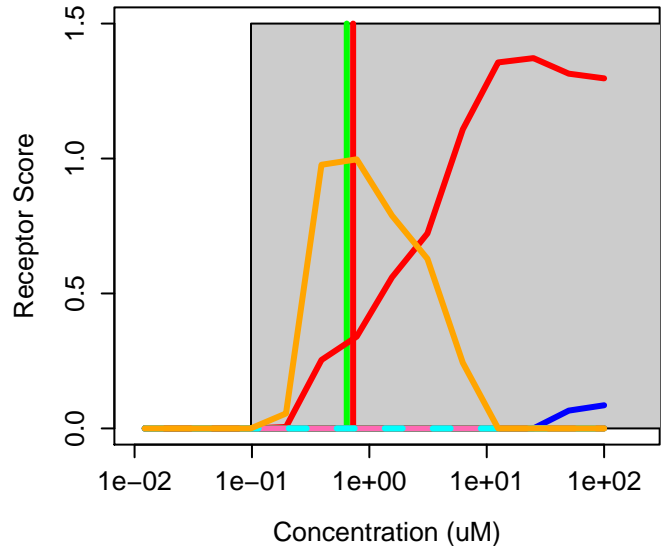

1461-25-2 : Tetrabutyltin

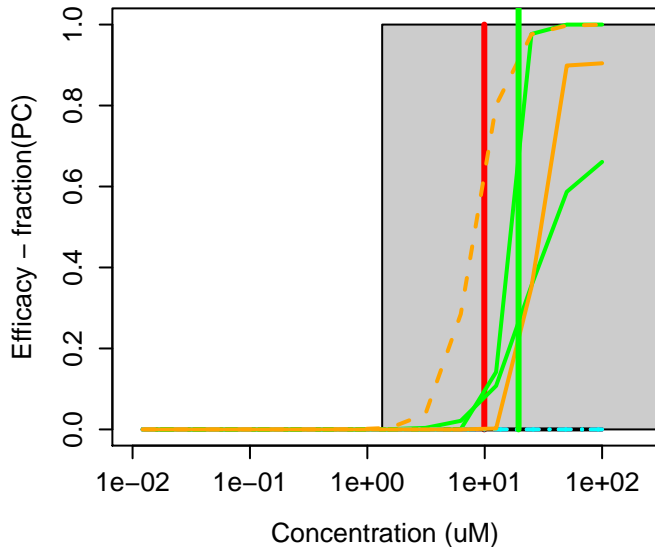

1461-25-2 : Tetrabutyltin  
Agonist: 0 Antagonist: 0.28

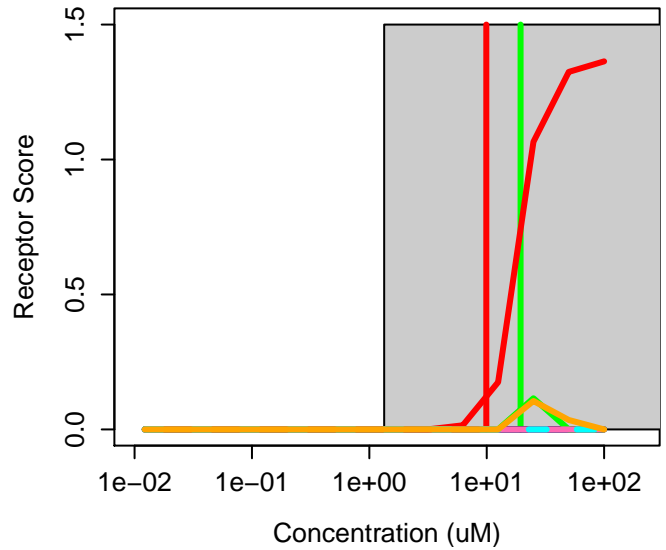

147-24-0 : Diphenhydramine hydrochloride

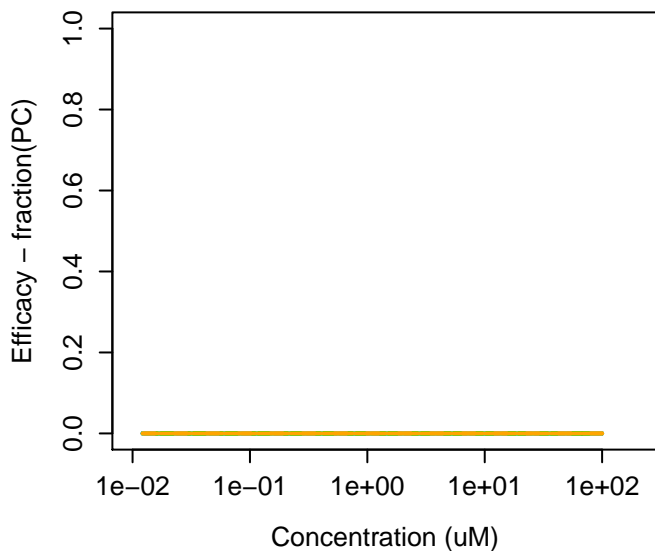

147-24-0 : Diphenhydramine hydrochloride  
Agonist: 0 Antagonist: 0



14765-30-1 : 2-sec-Butylcyclohexanone



14765-30-1 : 2-sec-Butylcyclohexanone  
Agonist: 0 Antagonist: 0



1477-55-0 : 1,3-Benzenedimethanamine



1477-55-0 : 1,3-Benzenedimethanamine  
Agonist: 0 Antagonist: 0



147-81-9 : Arabinose

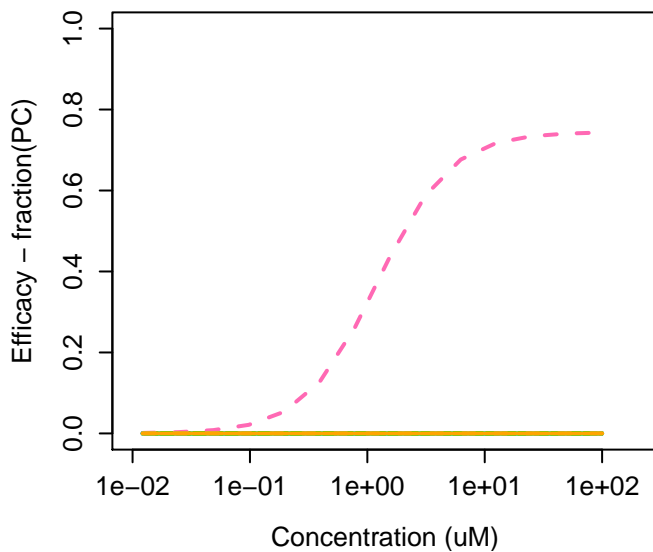

147-81-9 : Arabinose  
Agonist: 1.8e-08 Antagonist: 0

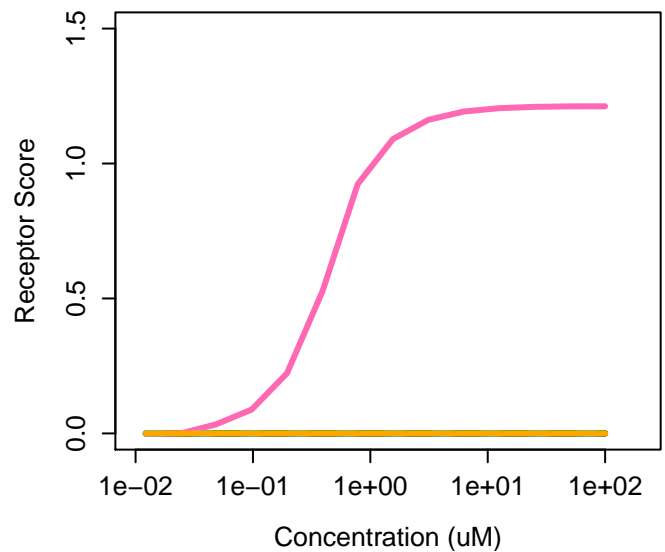

1478-61-1 : Bisphenol AF

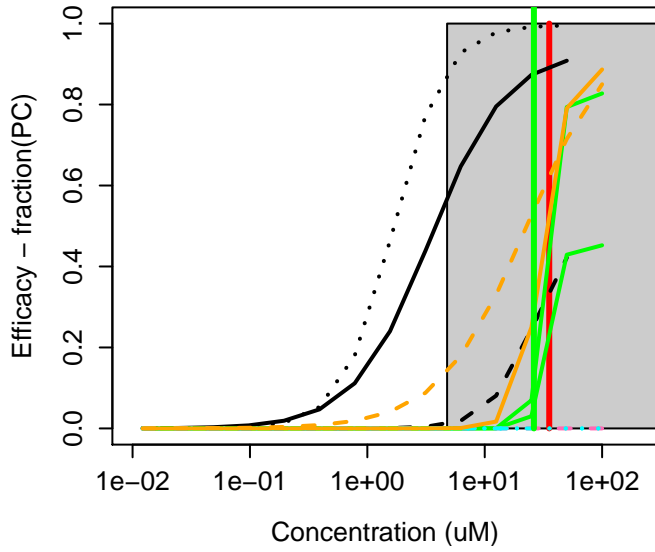

1478-61-1 : Bisphenol AF  
Agonist: 0 Antagonist: 0.33

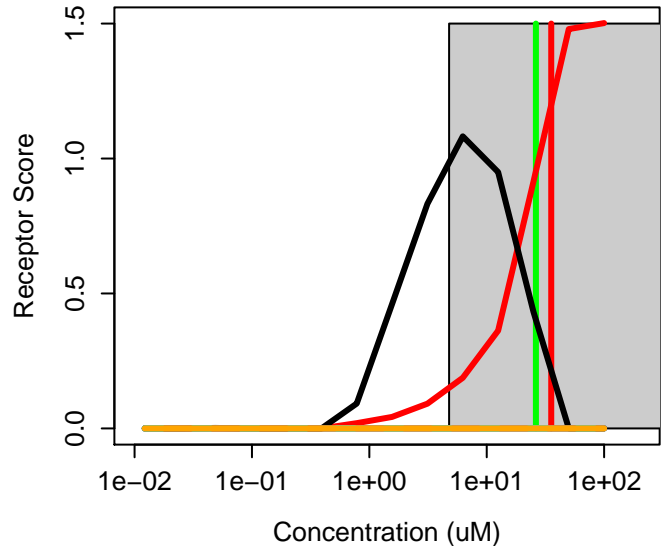

14816-18-3 : Phoxim

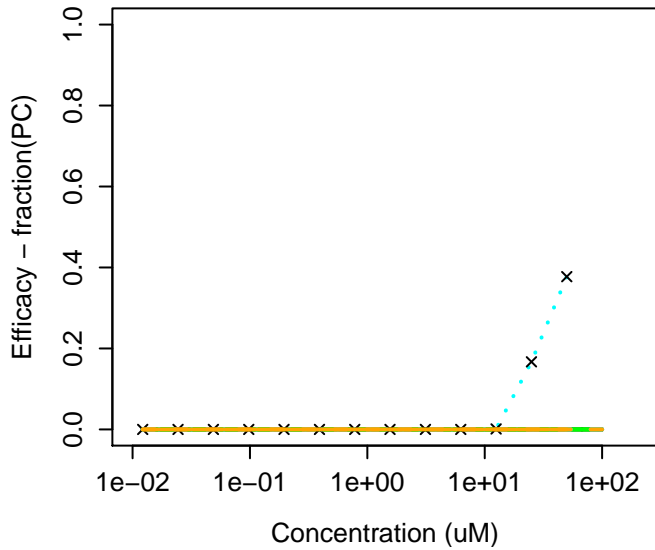

14816-18-3 : Phoxim  
Agonist: 0 Antagonist: 0



148-24-3 : 8-Hydroxyquinoline

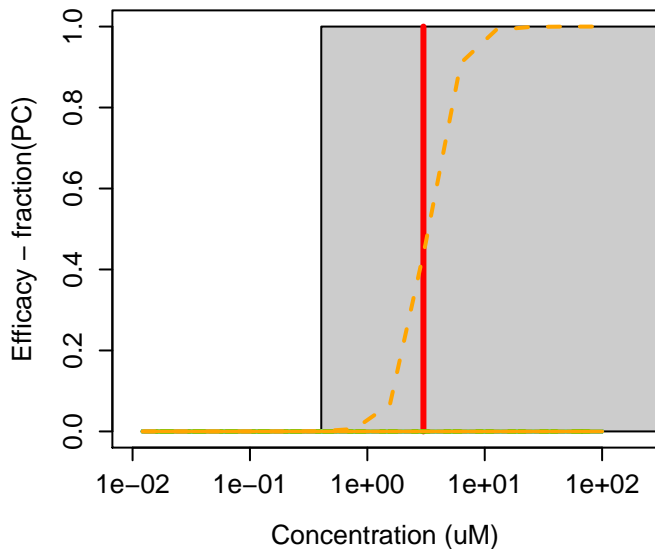

148-24-3 : 8-Hydroxyquinoline  
Agonist: 0 Antagonist: 0

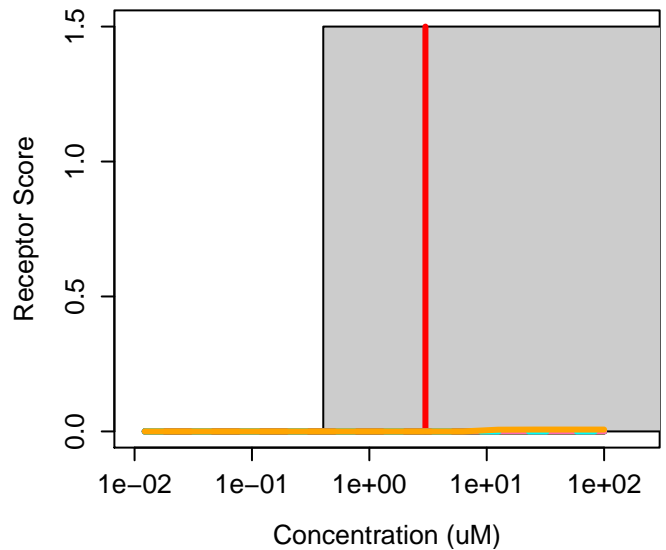

148477-71-8 : Spirodiclofen

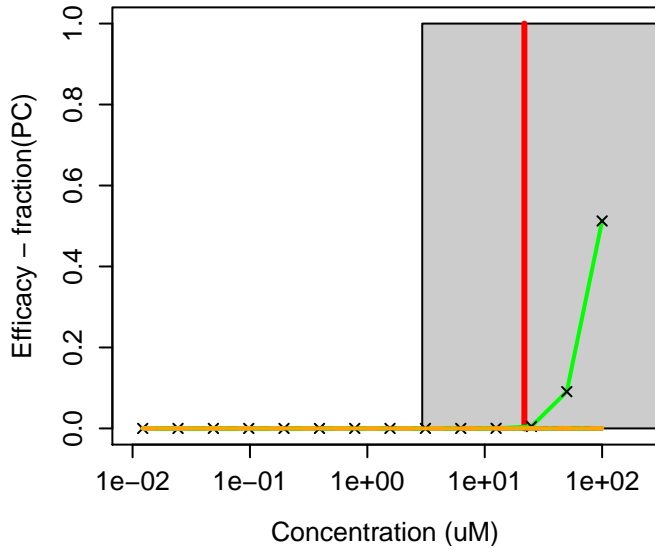

148477-71-8 : Spirodiclofen  
Agonist: 0 Antagonist: 0

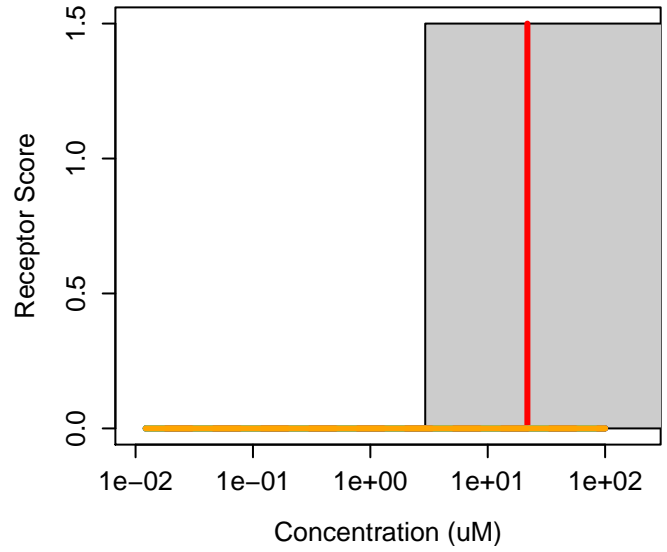

148-79-8 : Thiabendazole

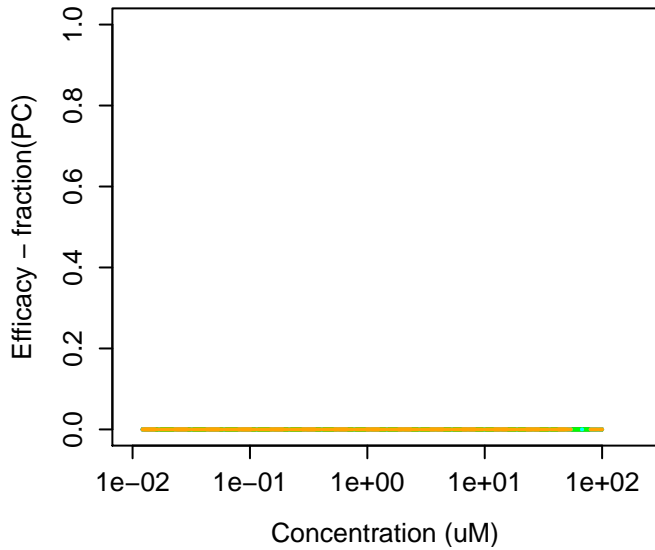

148-79-8 : Thiabendazole  
Agonist: 0 Antagonist: 0



1490-04-6 : Menthol

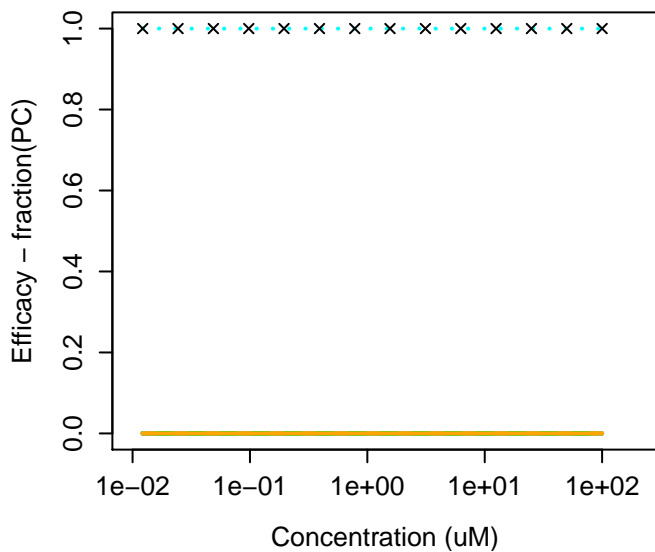

1490-04-6 : Menthol  
Agonist: 0 Antagonist: 0



1-07-6 : 4-(2,6,6-Trimethyl-cyclohex-1-enyl)-but-3-1-07-6 : 4-(2,6,6-Trimethyl-cyclohex-1-enyl)-but-3-  
Agonist: 0 Antagonist: 0



149062-75-9 : PharmaGSID\_47259

149062-75-9 : PharmaGSID\_47259  
Agonist: 0.00018 Antagonist: 0

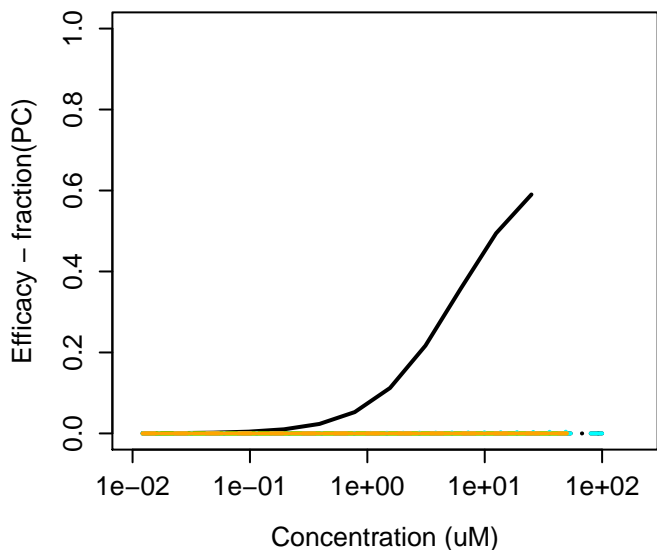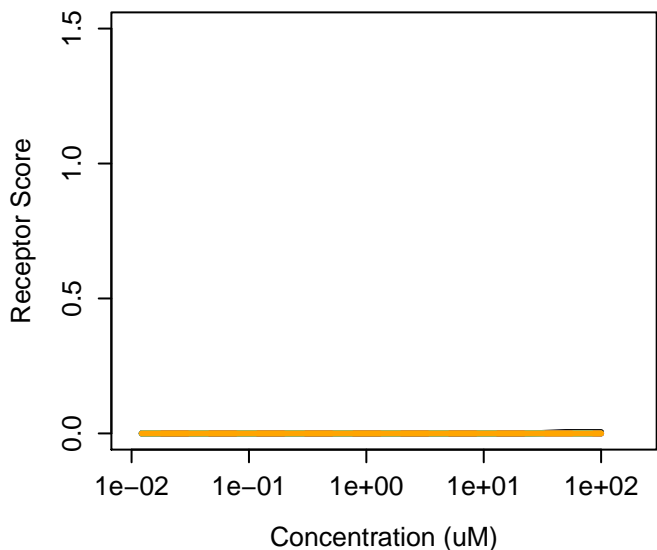

149-30-4 : 2-Mercaptobenzothiazole

149-30-4 : 2-Mercaptobenzothiazole  
Agonist: 0 Antagonist: 0

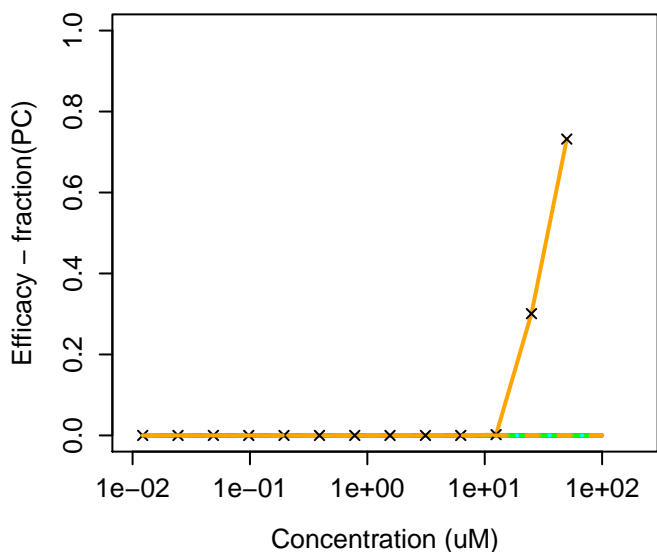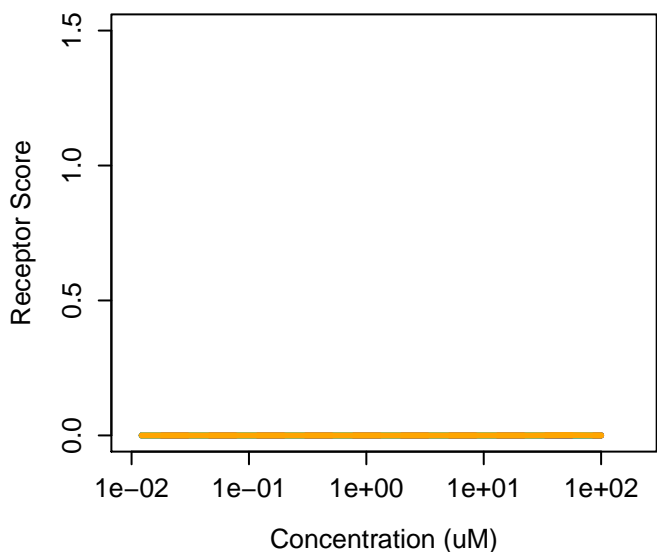

149413-74-1 : FR150011

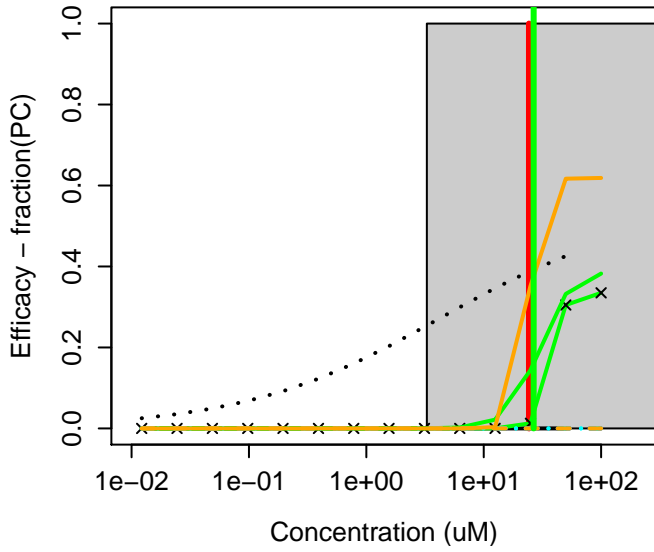

149413-74-1 : FR150011  
Agonist: 0.00015 Antagonist: 0.13

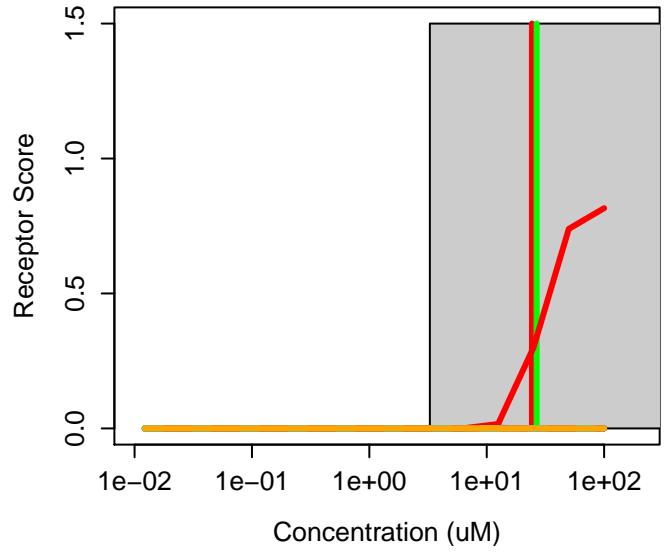

149-57-5 : 2-Ethylhexanoic acid

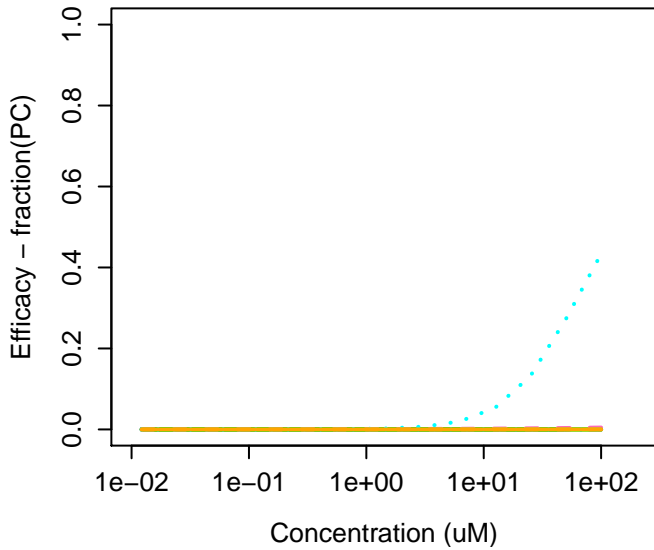

149-57-5 : 2-Ethylhexanoic acid  
Agonist: 0 Antagonist: 0

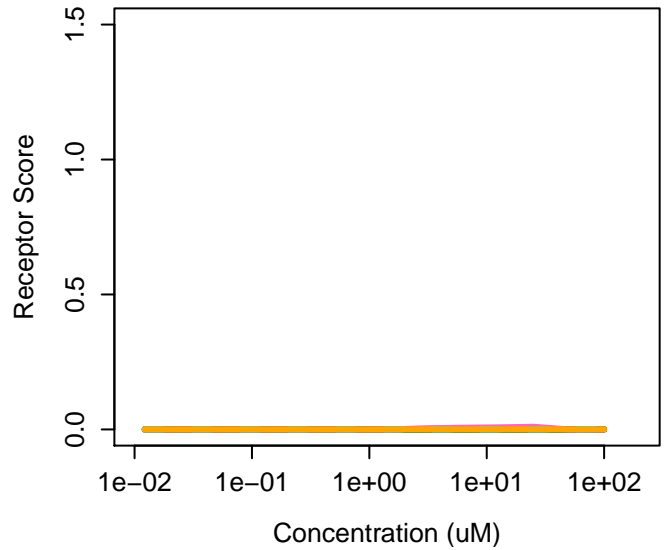

149877-41-8 : Bifenazate

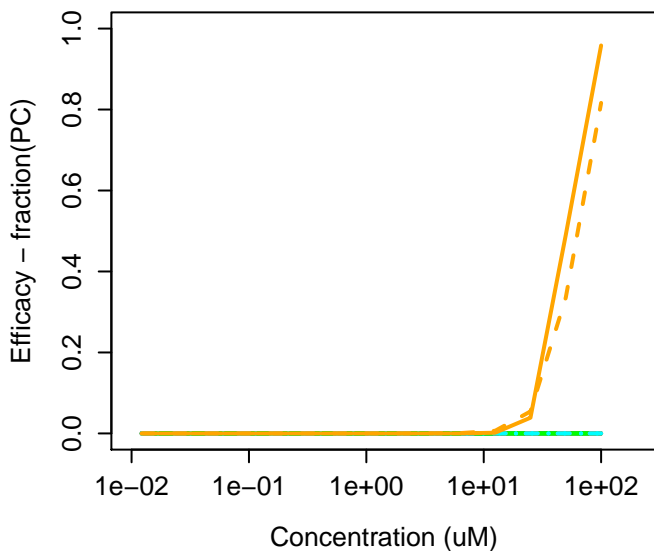

149877-41-8 : Bifenazate  
Agonist: 0 Antagonist: 0

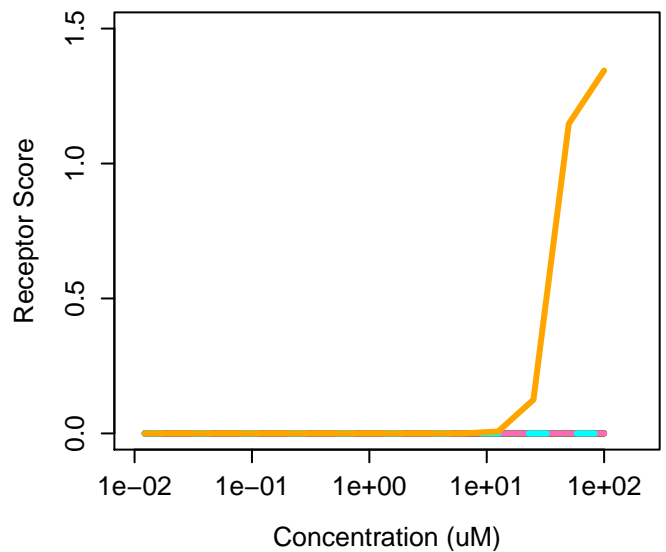



149979-41-9 : Tepraloxymid



149979-41-9 : Tepraloxymid  
Agonist: 0 Antagonist: 0



150-13-0 : 4-Aminobenzoic acid



150-13-0 : 4-Aminobenzoic acid  
Agonist: 0 Antagonist: 0



15046-75-0 : Sodium 2-methylbenzenesulfonate



15046-75-0 : Sodium 2-methylbenzenesulfonate  
Agonist: 0 Antagonist: 0



**150-68-5 : Monuron**



**150-68-5 : Monuron  
Agonist: 0 Antagonist: 0**



**150-76-5 : 4-Methoxyphenol**



**150-76-5 : 4-Methoxyphenol  
Agonist: 0 Antagonist: 0**



**150-78-7 : Hydroquinone dimethyl ether**



**150-78-7 : Hydroquinone dimethyl ether  
Agonist: 0 Antagonist: 0**



151-05-3 : Dimethylbenzylcarbiny acetate

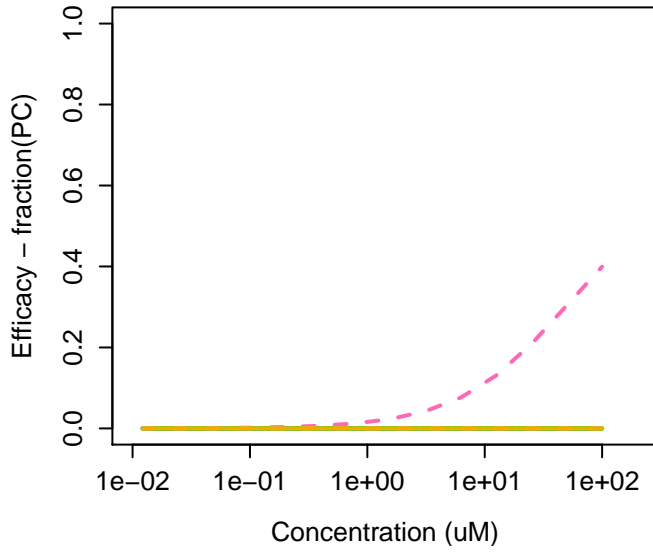

151-05-3 : Dimethylbenzylcarbiny acetate  
Agonist: 0 Antagonist: 0

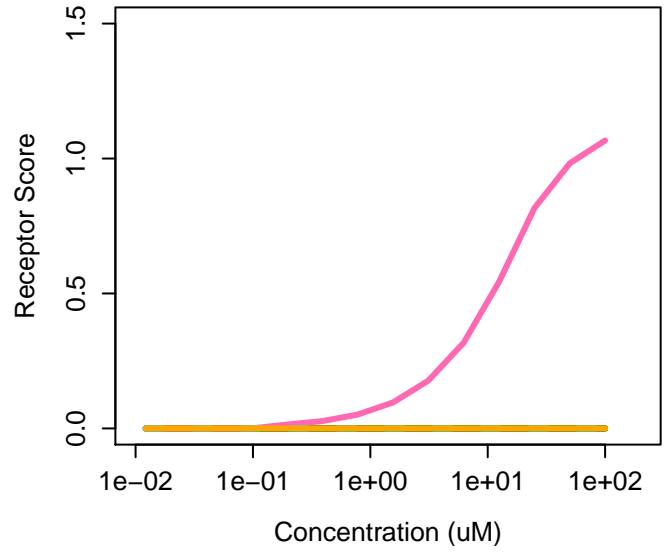

151-21-3 : Sodium dodecyl sulfate

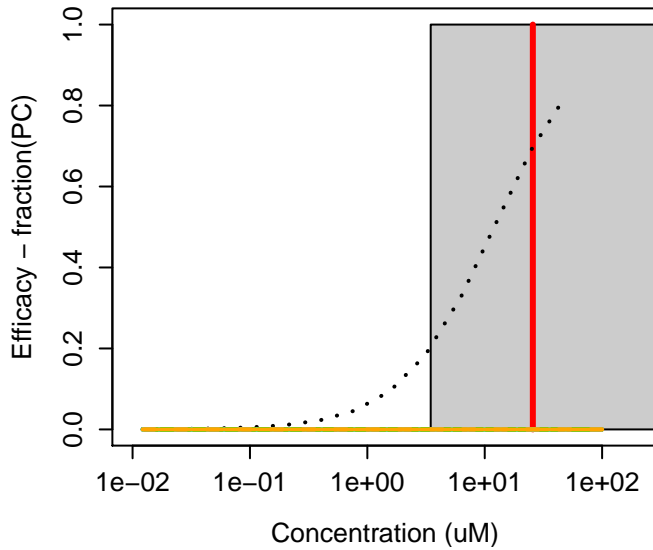

151-21-3 : Sodium dodecyl sulfate  
Agonist: 0 Antagonist: 5.5e-05

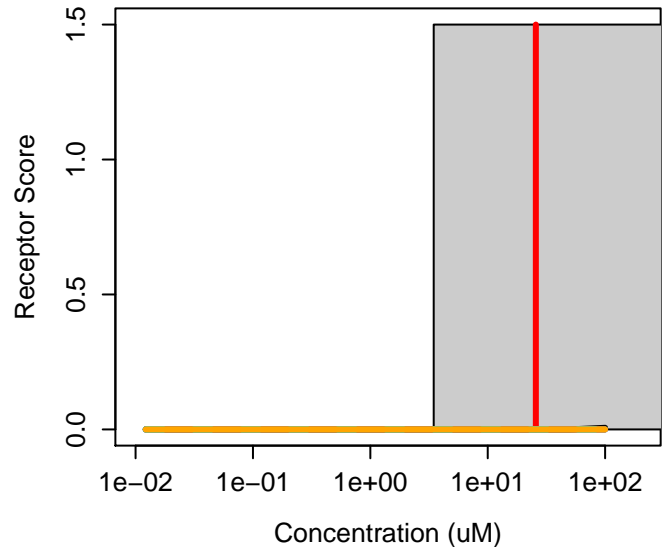

151506-44-4 : FR140423



151506-44-4 : FR140423  
Agonist: 0 Antagonist: 0



214-89-8 : 2-Acrylamido-2-methyl-1-propanesulfonamide  
Agonist: 0 Antagonist: 0



15299-99-7 : Napropamide

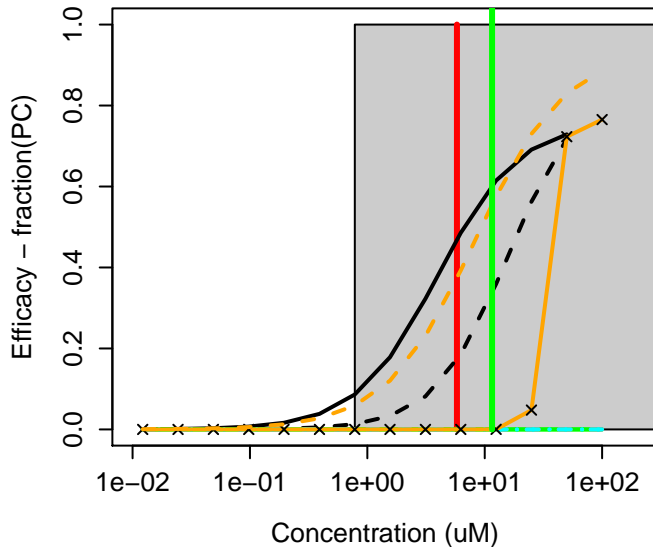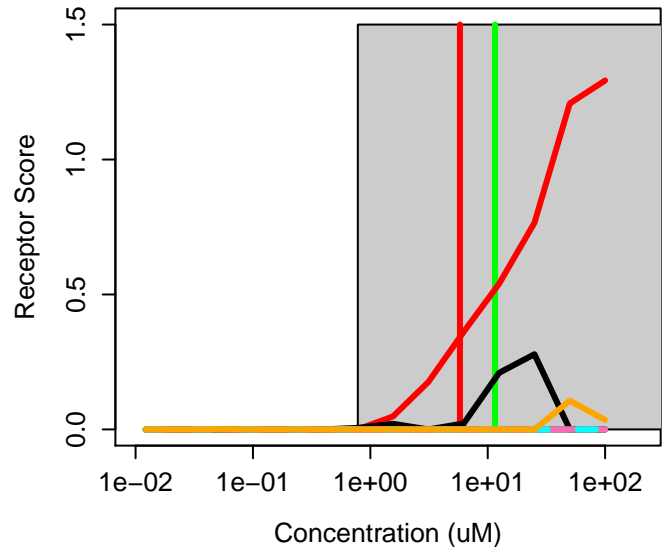

15299-99-7 : Napropamide  
Agonist: 0 Antagonist: 0.31

15307-79-6 : Diclofenac sodium

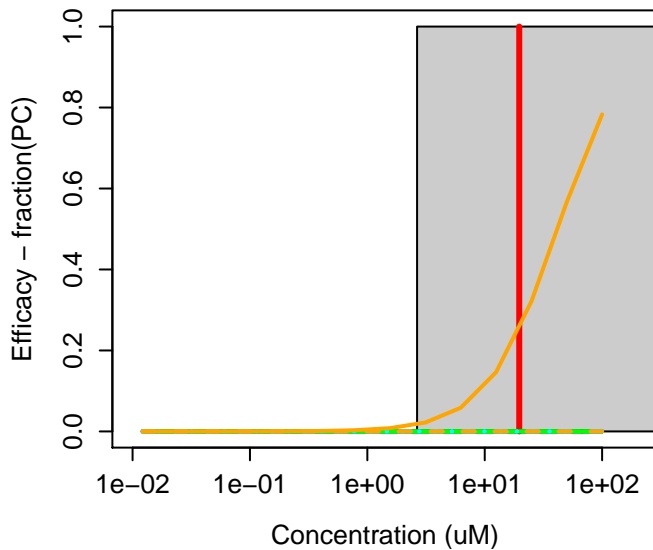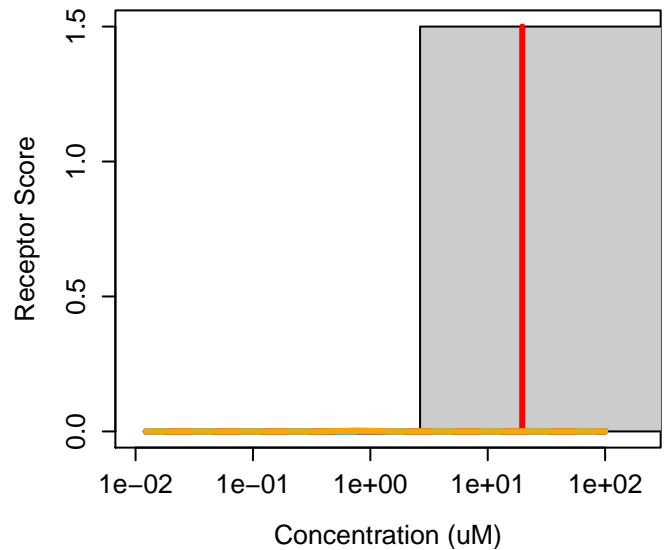

15307-79-6 : Diclofenac sodium  
Agonist: 0 Antagonist: 0

15310-01-7 : Benodanil

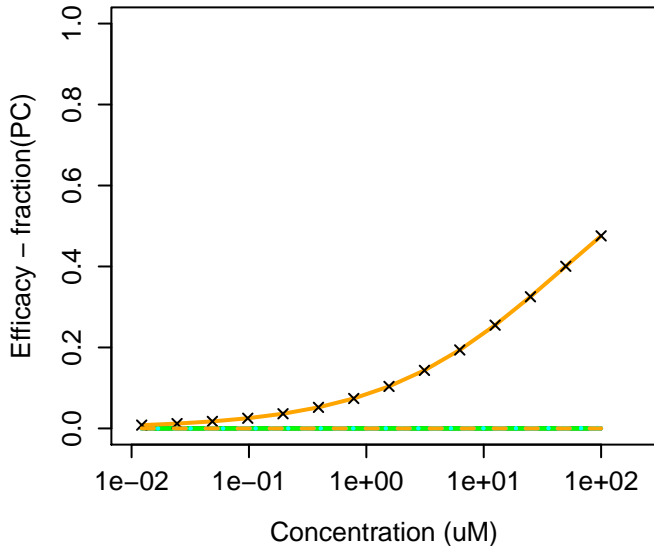

15310-01-7 : Benodanil  
Agonist: 0 Antagonist: 0



153233-91-1 : Etoxazole

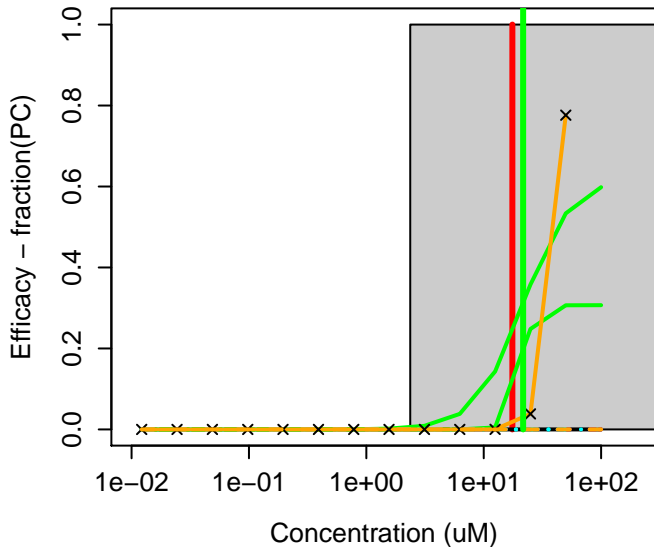

153233-91-1 : Etoxazole  
Agonist: 0 Antagonist: 0.083

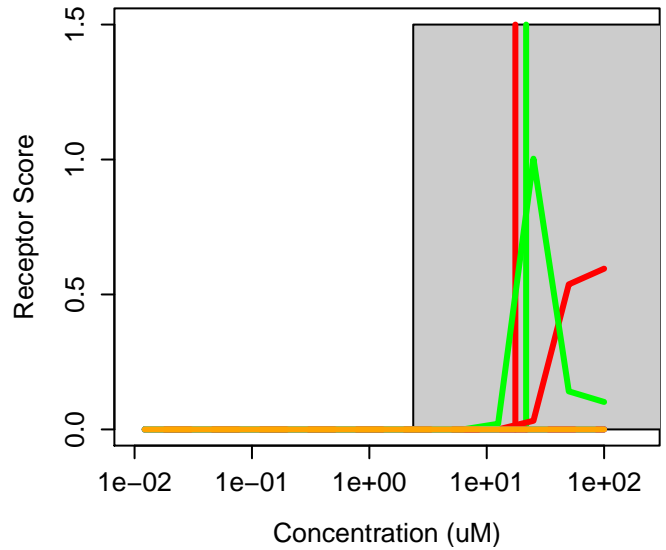

153719-23-4 : Thiamethoxam



153719-23-4 : Thiamethoxam  
Agonist: 0 Antagonist: 0



1541-81-7 : 4-Dodecylmorpholine



1541-81-7 : 4-Dodecylmorpholine  
Agonist: 0 Antagonist: 0



154-42-7 : 6-Thioguanine

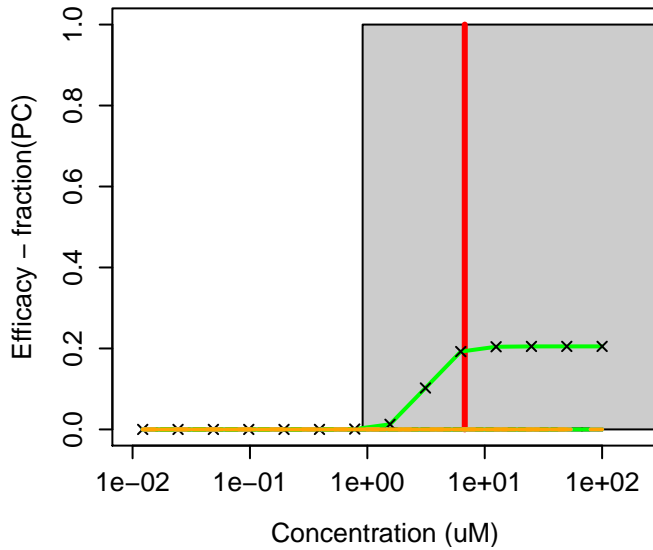

154-42-7 : 6-Thioguanine  
Agonist: 0 Antagonist: 0

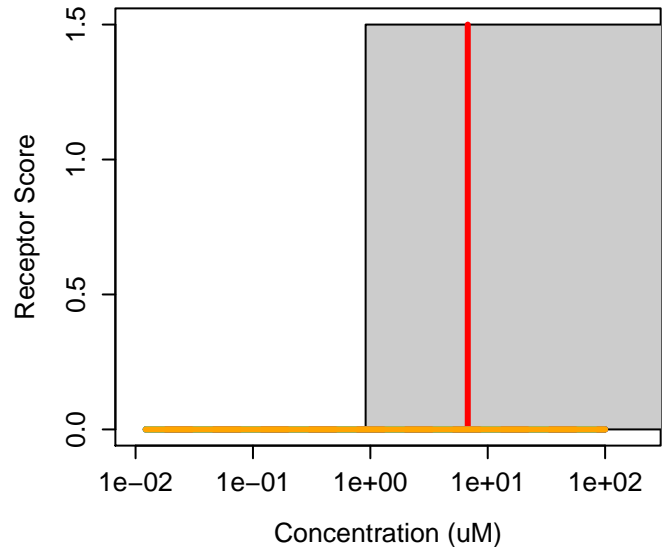

15499-27-1 : 4-Butylchlorobenzene



15499-27-1 : 4-Butylchlorobenzene  
Agonist: 0 Antagonist: 0



155569-91-8 : Emamectin benzoate

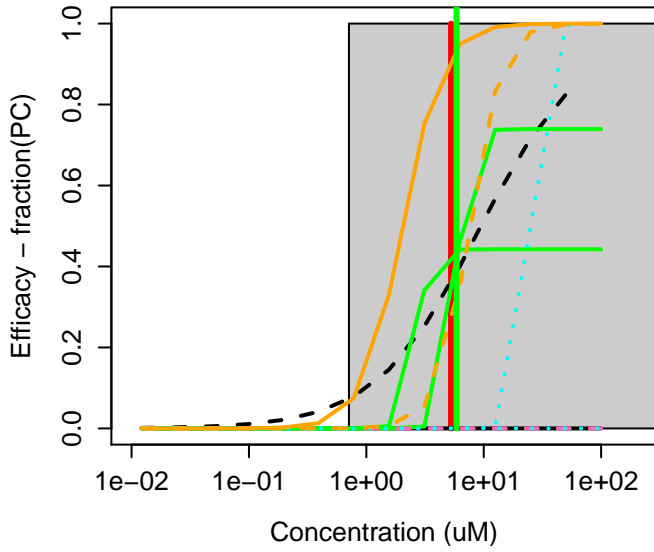

155569-91-8 : Emamectin benzoate  
Agonist: 0 Antagonist: 0.52

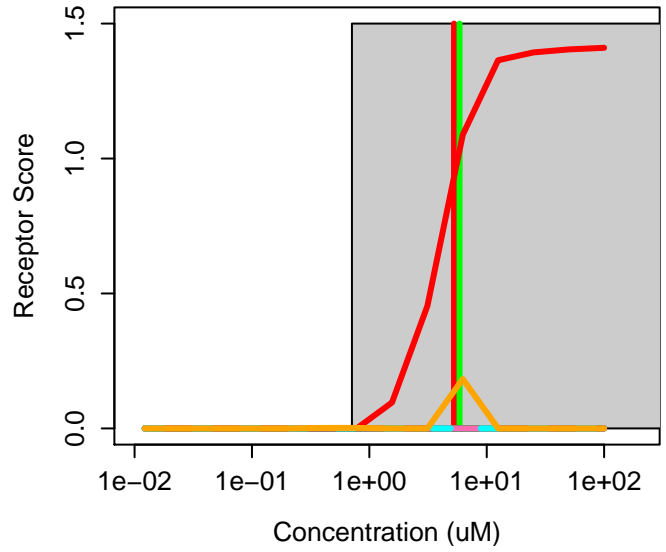

1559-34-8 : 3,6,9,12-Tetraoxahexadecan-1-ol



1559-34-8 : 3,6,9,12-Tetraoxahexadecan-1-ol  
Agonist: 0 Antagonist: 0



1559-35-9 : 2-(2-Ethylhexyloxy)ethanol

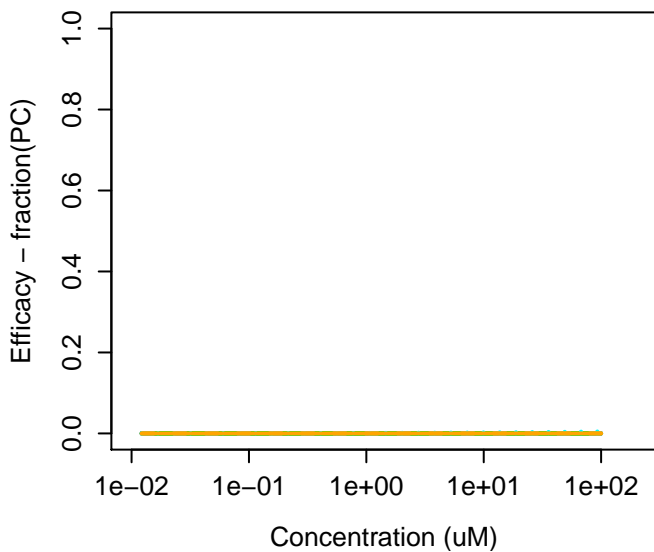

1559-35-9 : 2-(2-Ethylhexyloxy)ethanol  
Agonist: 0 Antagonist: 0

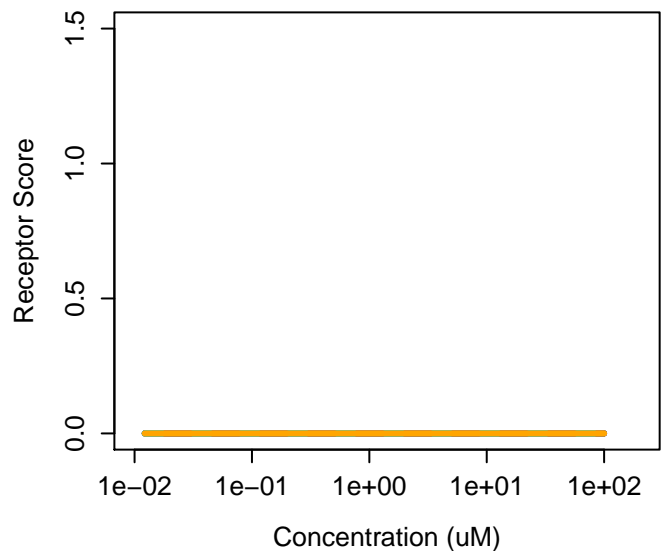

155990-20-8 : SR271425

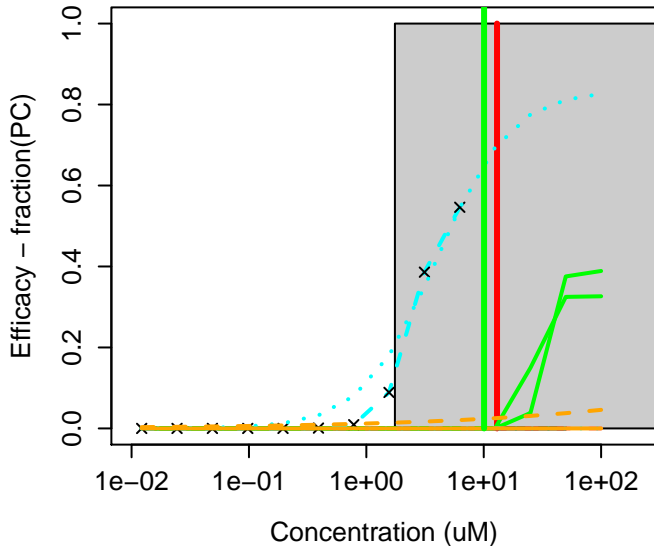

155990-20-8 : SR271425  
Agonist: 0.08 Antagonist: 0

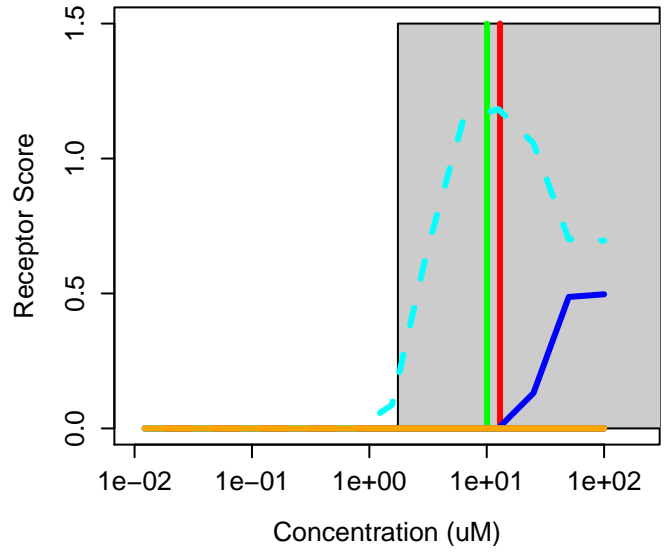

156052-68-5 : Zoxamide

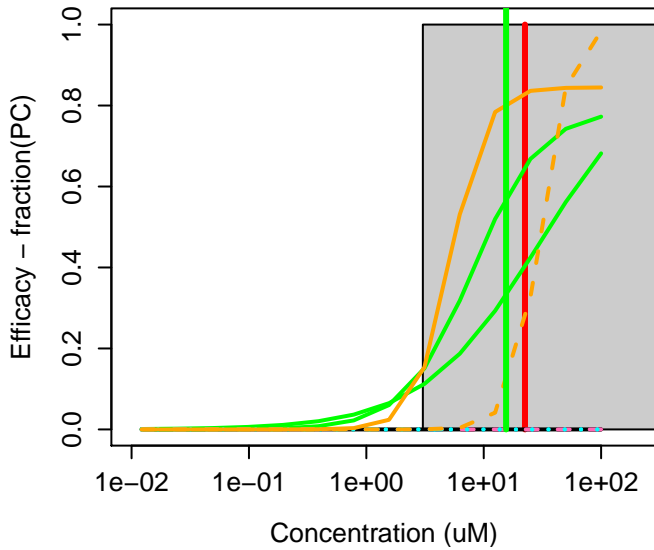

156052-68-5 : Zoxamide  
Agonist: 0 Antagonist: 0.29

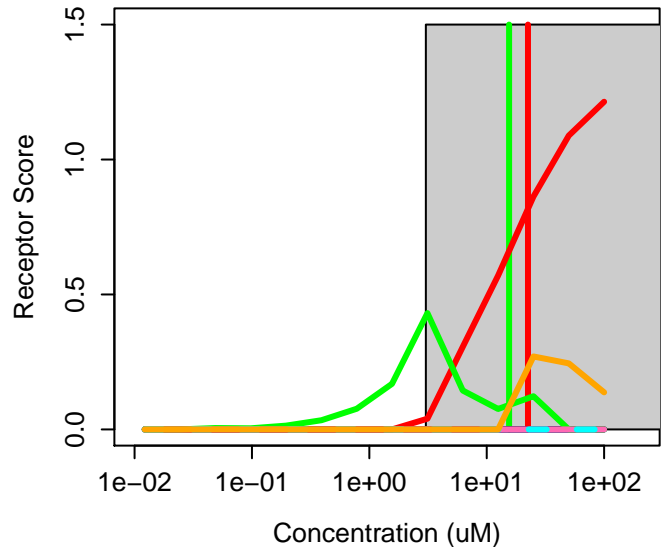

156-10-5 : 4-Nitrosodiphenylamine

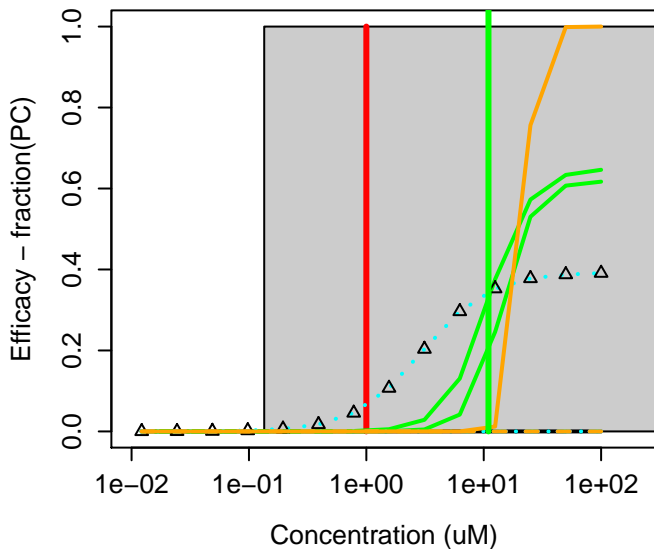

156-10-5 : 4-Nitrosodiphenylamine  
Agonist: 0.017 Antagonist: 0.16

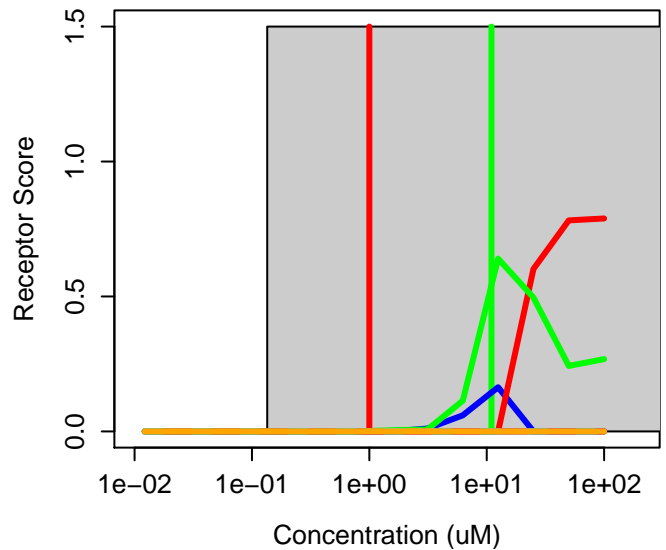



15619-48-4 : 1-Benzylquinolinium chloride

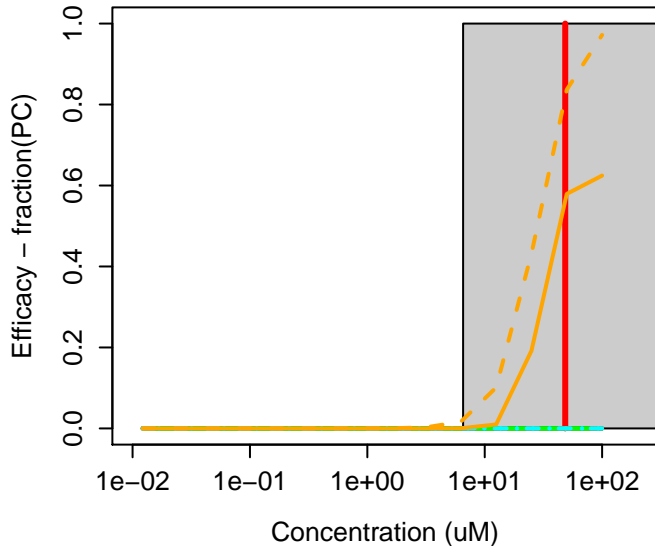

15619-48-4 : 1-Benzylquinolinium chloride  
Agonist: 0 Antagonist: 0

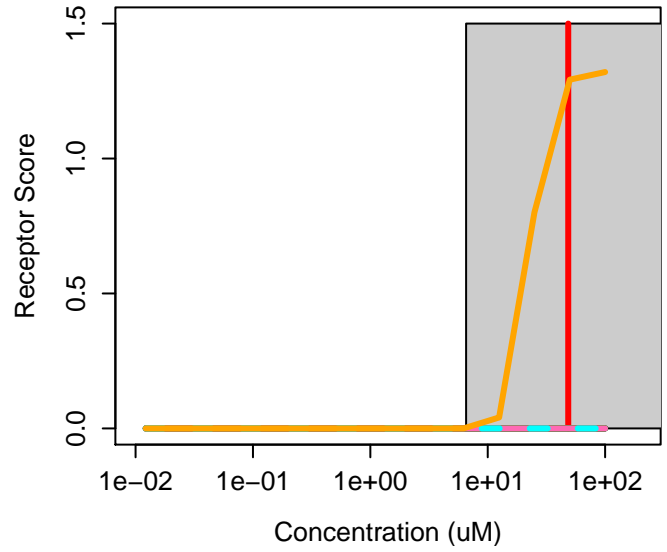

1563-38-8 : 2,3-Dihydro-2,2-dimethyl-7-benzofur: 1563-38-8 : 2,3-Dihydro-2,2-dimethyl-7-benzofur:  
Agonist: 7.2e-06 Antagonist: 0

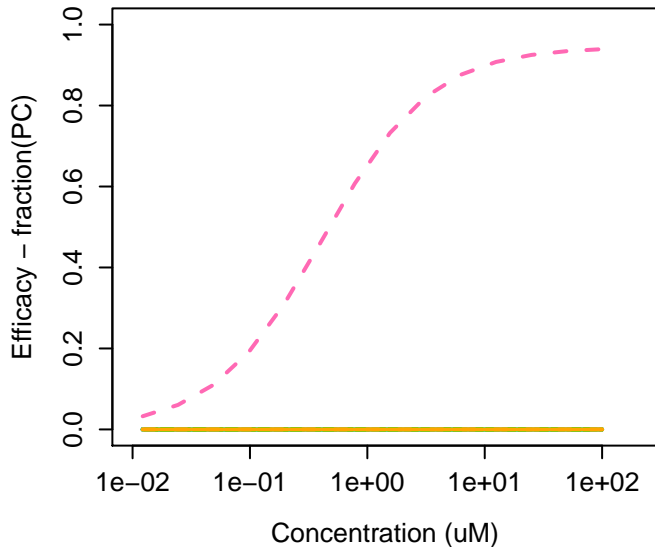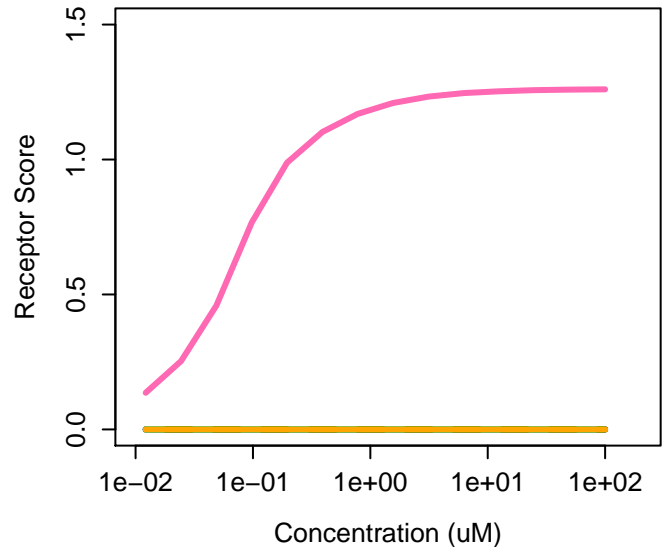

1563-66-2 : Carbofuran



1563-66-2 : Carbofuran  
Agonist: 0 Antagonist: 0



156-43-4 : 4-Ethoxyaniline

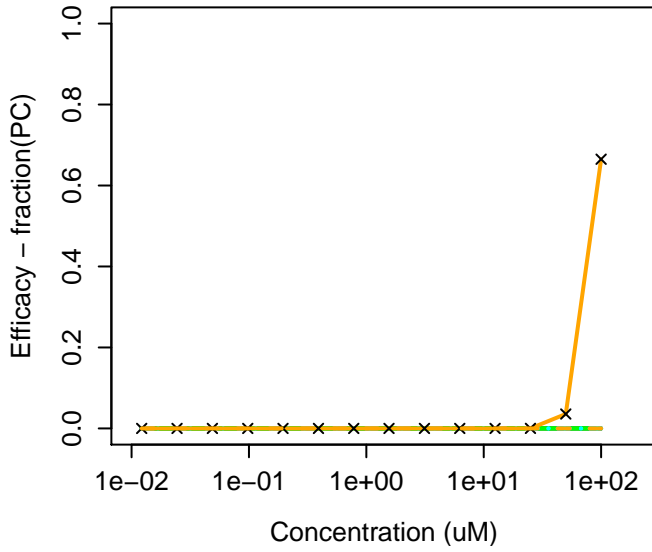

156-43-4 : 4-Ethoxyaniline  
Agonist: 0 Antagonist: 0



156-60-5 : (E)-1,2-Dichloroethylene



156-60-5 : (E)-1,2-Dichloroethylene  
Agonist: 0 Antagonist: 0



1569-01-3 : 1-Propoxy-2-propanol

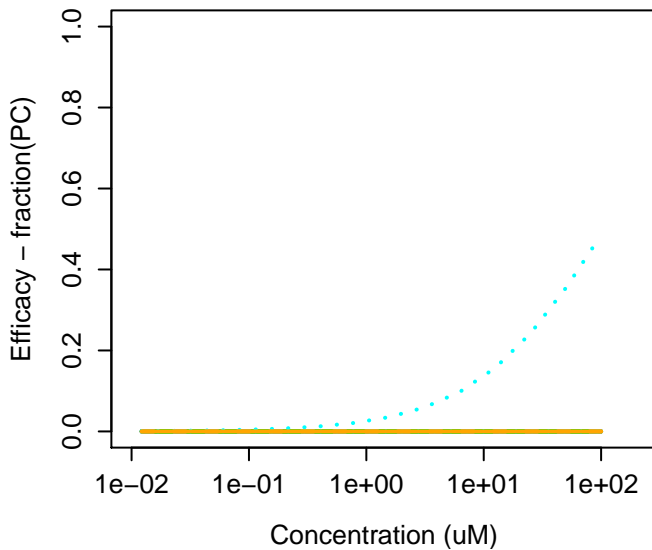

1569-01-3 : 1-Propoxy-2-propanol  
Agonist: 0 Antagonist: 0

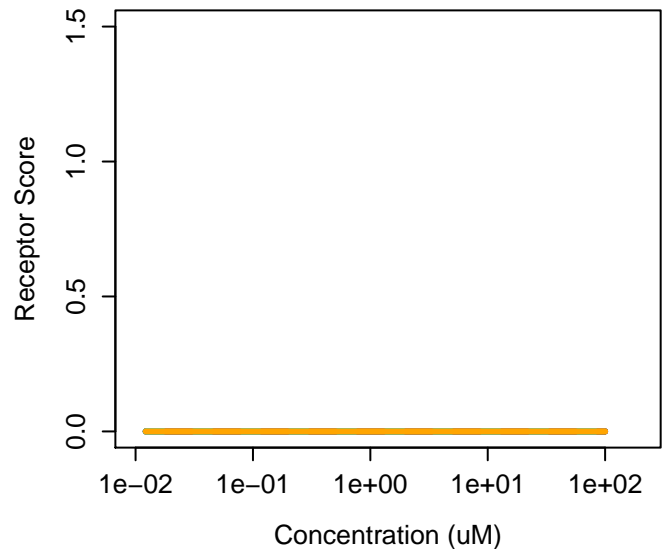

1569-02-4 : 1-Ethoxy-2-propanol



1569-02-4 : 1-Ethoxy-2-propanol  
Agonist: 0 Antagonist: 0



1570-64-5 : 4-Chloro-2-methylphenol



1570-64-5 : 4-Chloro-2-methylphenol  
Agonist: 0 Antagonist: 0



708-41-5 : Ethylenediaminetetraacetic acid ferric sod  
708-41-5 : Ethylenediaminetetraacetic acid ferric sod  
Agonist: 0 Antagonist: 0

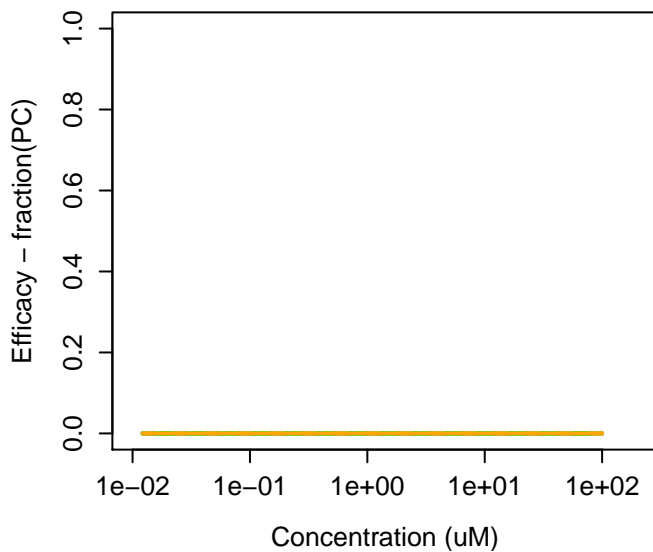

158081-99-3 : CP-105696

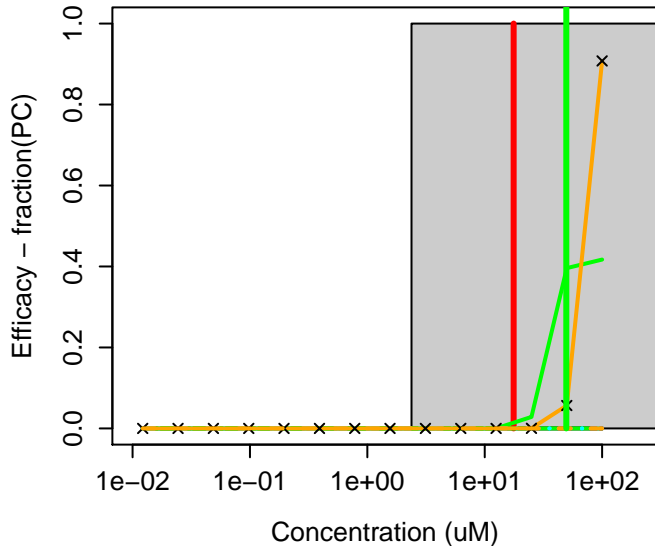

158081-99-3 : CP-105696  
Agonist: 0 Antagonist: 0.024

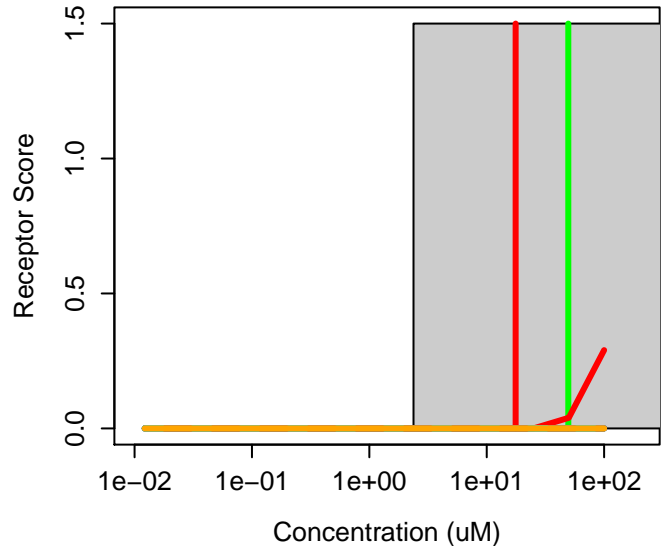

1582-09-8 : Trifluralin

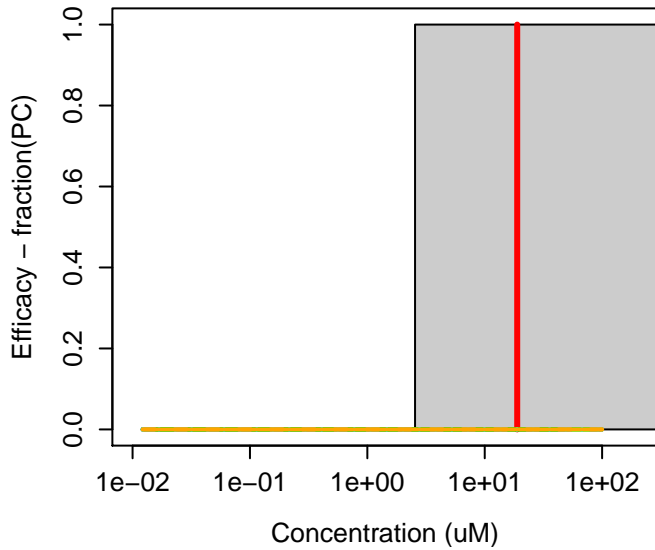

1582-09-8 : Trifluralin  
Agonist: 0 Antagonist: 0

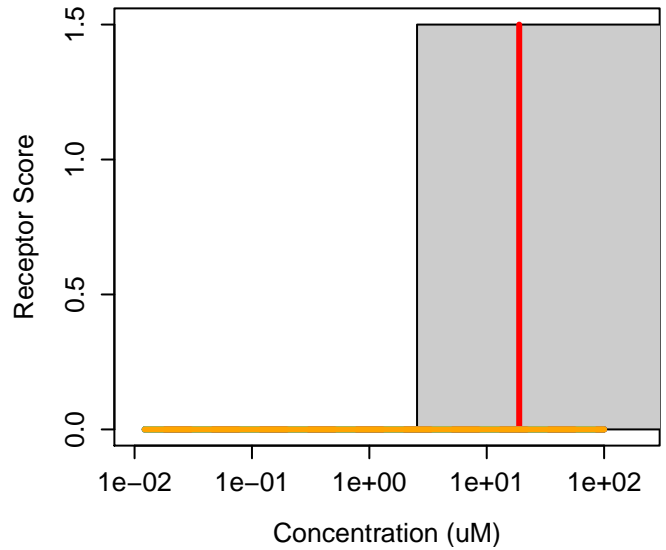

159138-81-5 : Cariporide mesylate



159138-81-5 : Cariporide mesylate  
Agonist: 0 Antagonist: 0



1596-84-5 : Daminozide



1596-84-5 : Daminozide  
Agonist: 0 Antagonist: 0



15972-60-8 : Alachlor

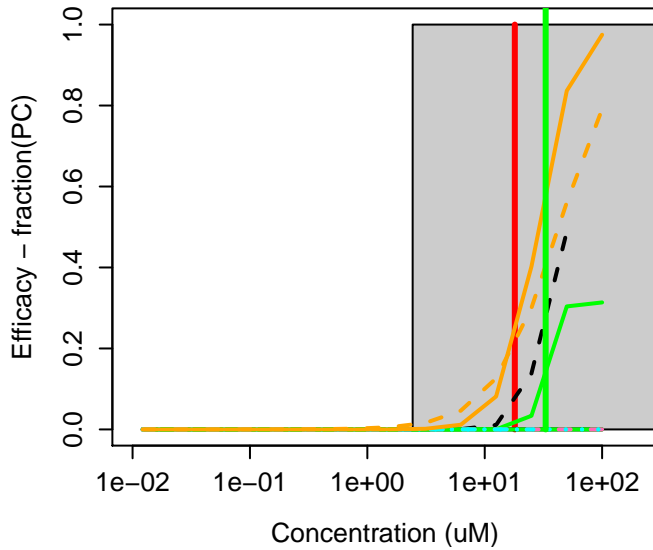

15972-60-8 : Alachlor  
Agonist: 0 Antagonist: 0.11

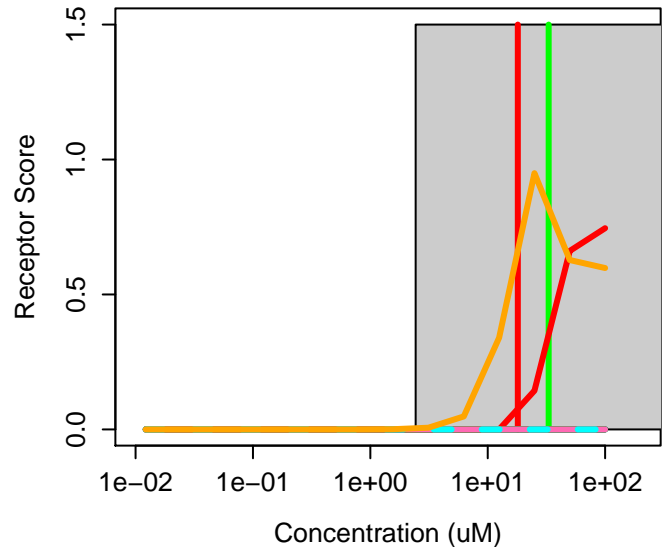

16079-88-2 : Bromo-3-chloro-5,5-dimethylhydant



16079-88-2 : Bromo-3-chloro-5,5-dimethylhydant  
Agonist: 0 Antagonist: 0



1610-18-0 : Prometon



1610-18-0 : Prometon  
Agonist: 0 Antagonist: 0



161050-58-4 : Methoxyfenozide



161050-58-4 : Methoxyfenozide  
Agonist: 0 Antagonist: 0



161326-34-7 : Fenamidone

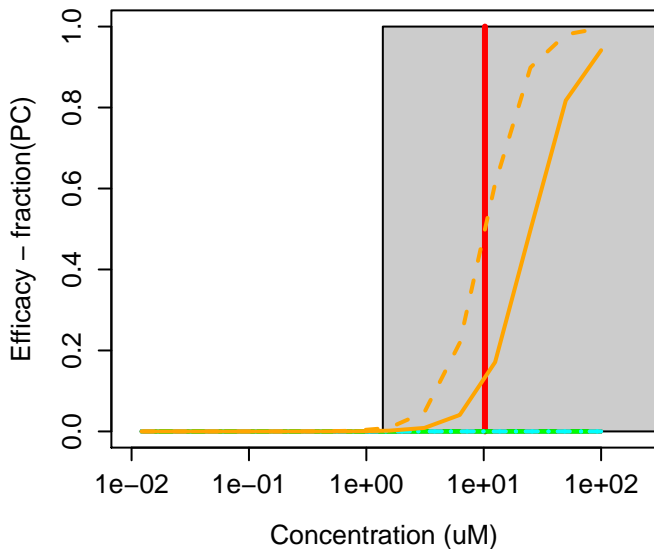

161326-34-7 : Fenamidone  
Agonist: 0 Antagonist: 0.00054

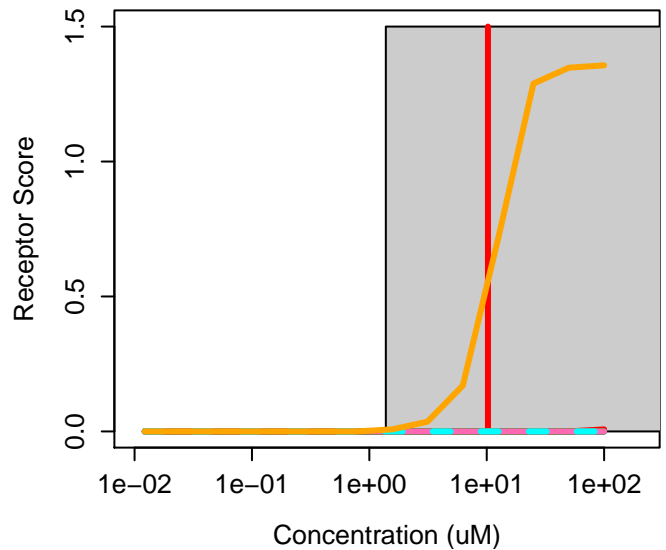

16219-75-3 : 5-Ethylidene-2-norbornene



16219-75-3 : 5-Ethylidene-2-norbornene  
Agonist: 0 Antagonist: 0



1625-91-8 : 4,4'-Di-tert-butylbiphenyl

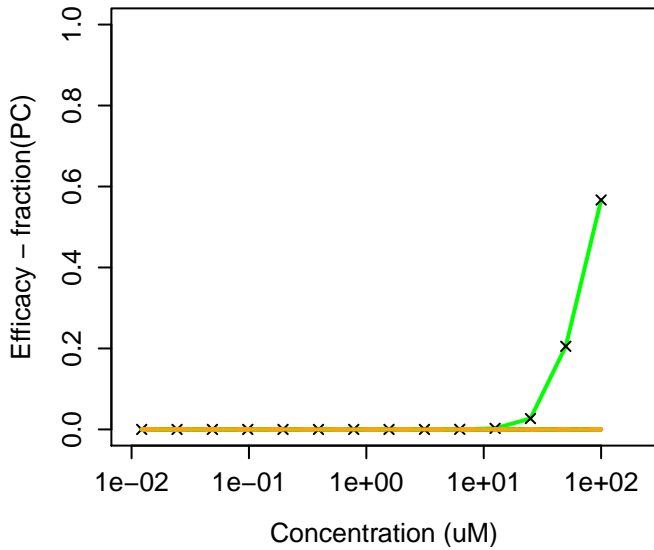

1625-91-8 : 4,4'-Di-tert-butylbiphenyl  
Agonist: 0 Antagonist: 0



162706-14-1 : UK-156819

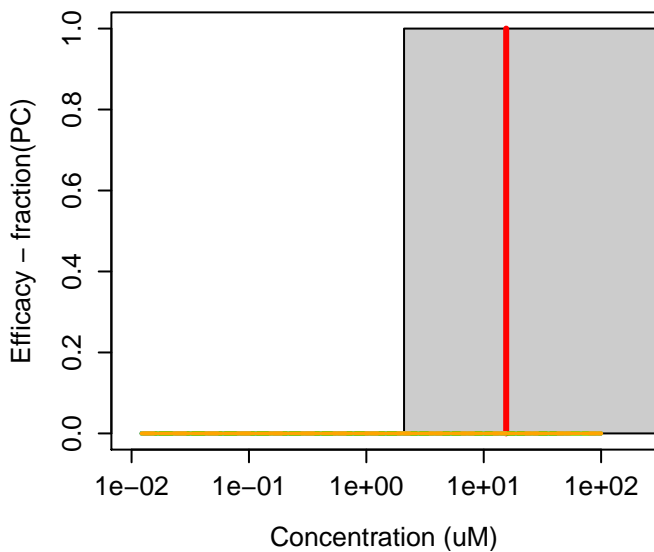

162706-14-1 : UK-156819  
Agonist: 0 Antagonist: 0

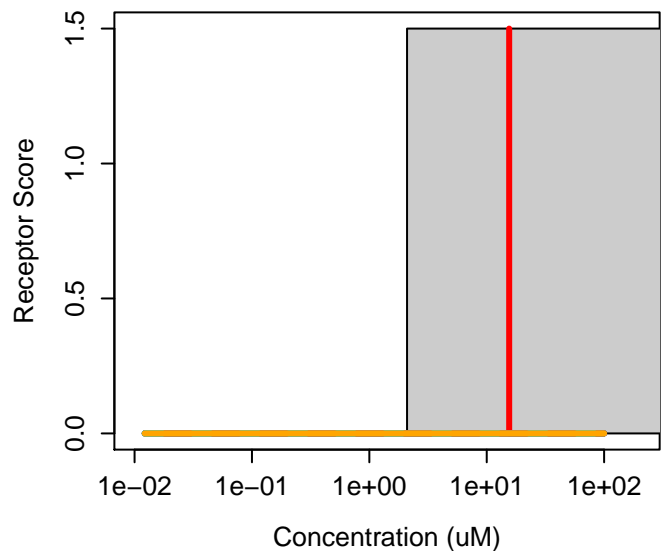

1632-73-1 : Fenchol



1632-73-1 : Fenchol  
Agonist: 0 Antagonist: 0



1634-78-2 : Malaoxon

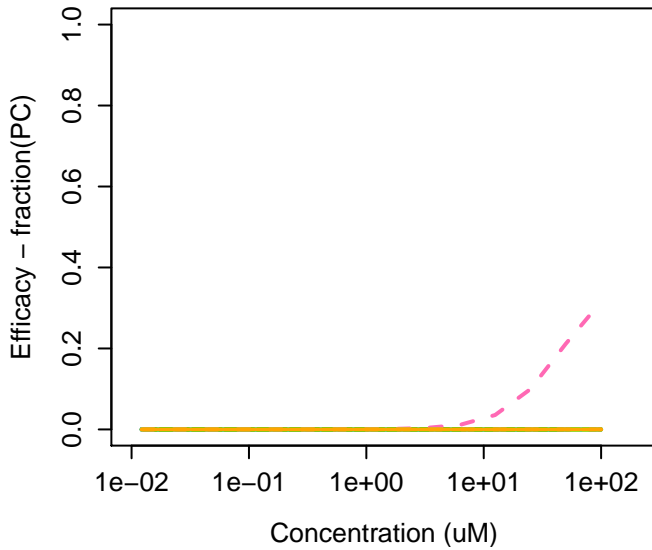

1634-78-2 : Malaoxon  
Agonist: 0 Antagonist: 0

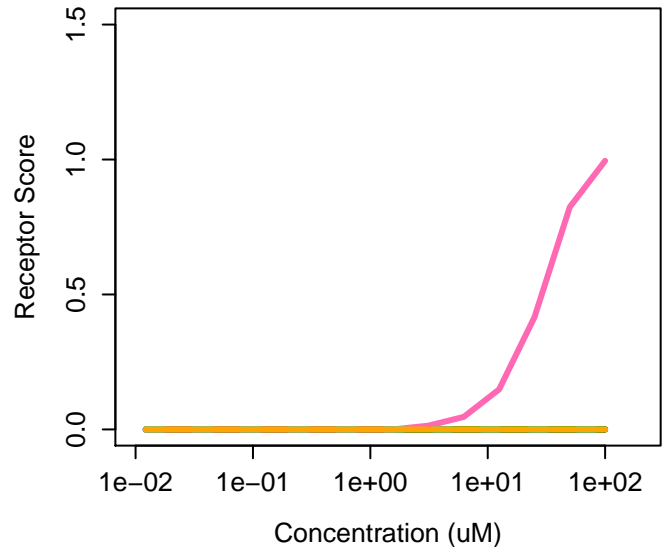

163520-33-0 : Isoxadifen-ethyl



163520-33-0 : Isoxadifen-ethyl  
Agonist: 0 Antagonist: 0





1638-22-8 : 4-Butylphenol

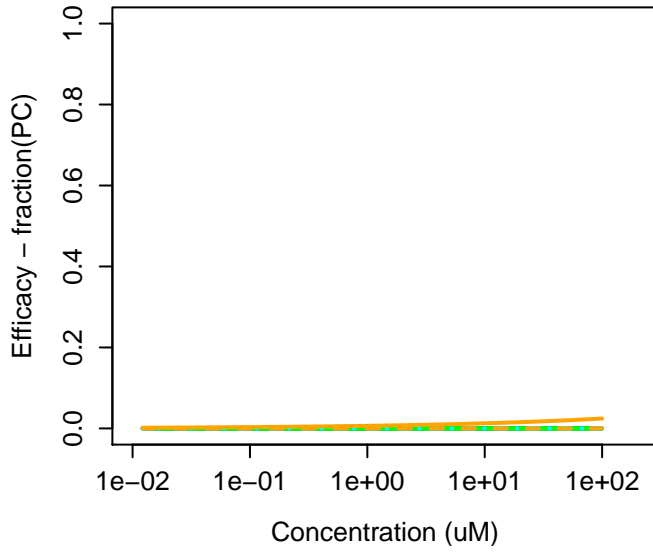

1638-22-8 : 4-Butylphenol  
Agonist: 0 Antagonist: 0

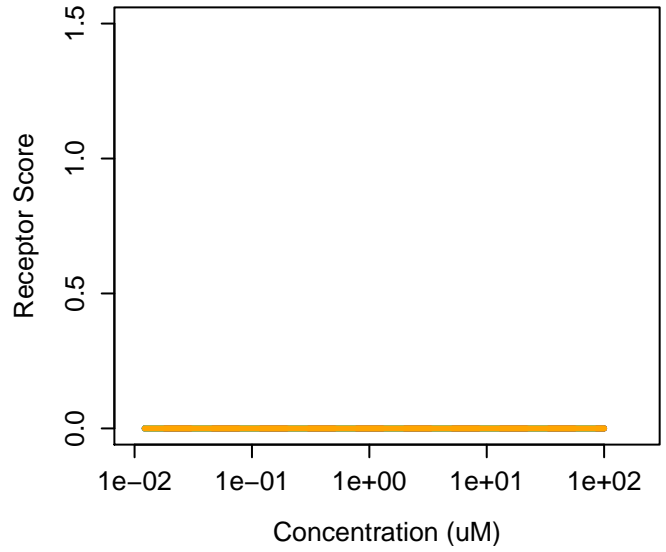

16423-68-0 : FD&C Red 3

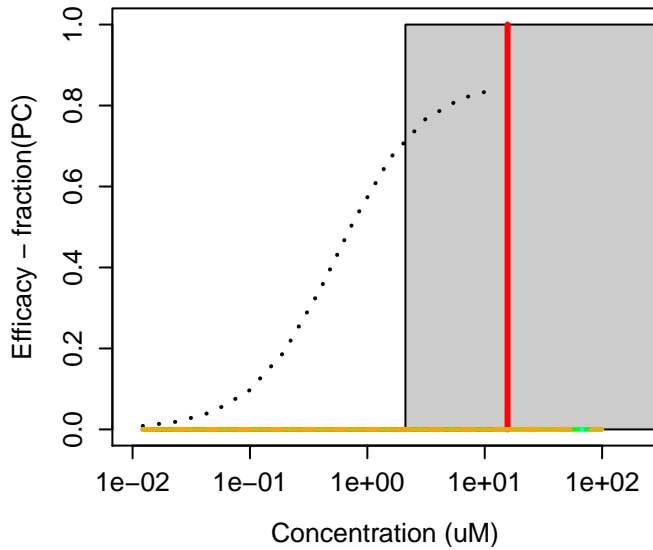

16423-68-0 : FD&C Red 3  
Agonist: 0.00017 Antagonist: 0.00018

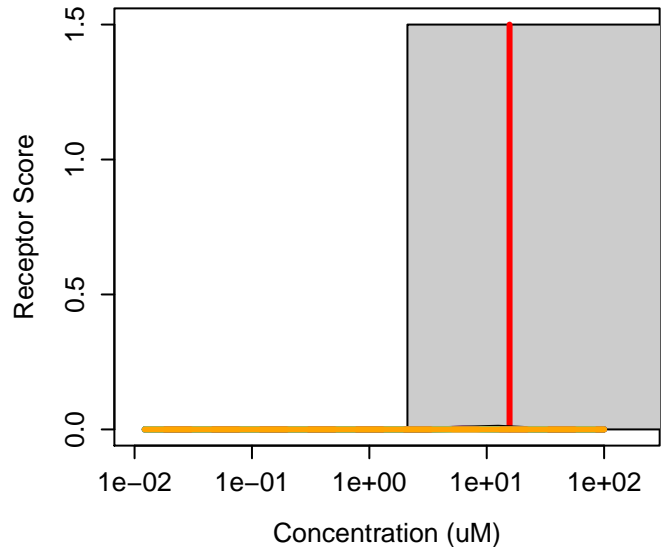

1646-75-9 : Aldicarb oxime

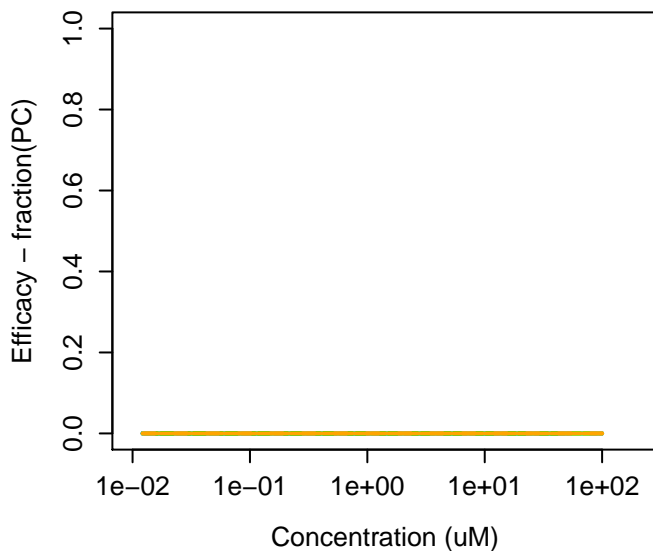

1646-75-9 : Aldicarb oxime  
Agonist: 0 Antagonist: 0



**1646-87-3 : Aldicarb sulfoxide**

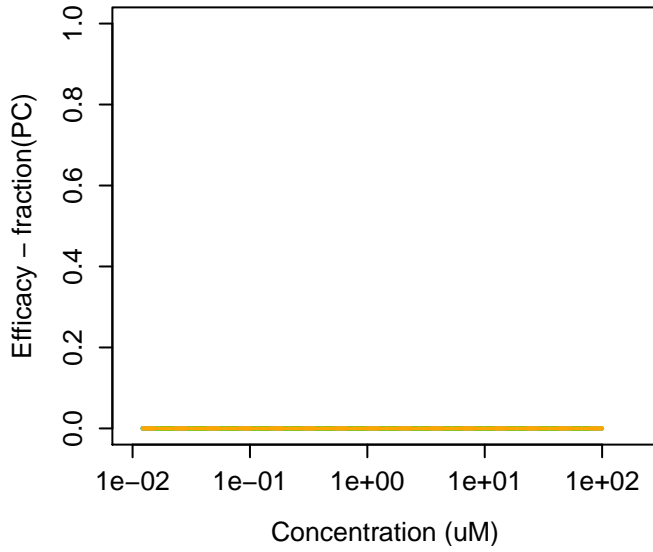

**1646-87-3 : Aldicarb sulfoxide**  
**Agonist: 0 Antagonist: 0**



**1646-88-4 : Aldoxycarb**

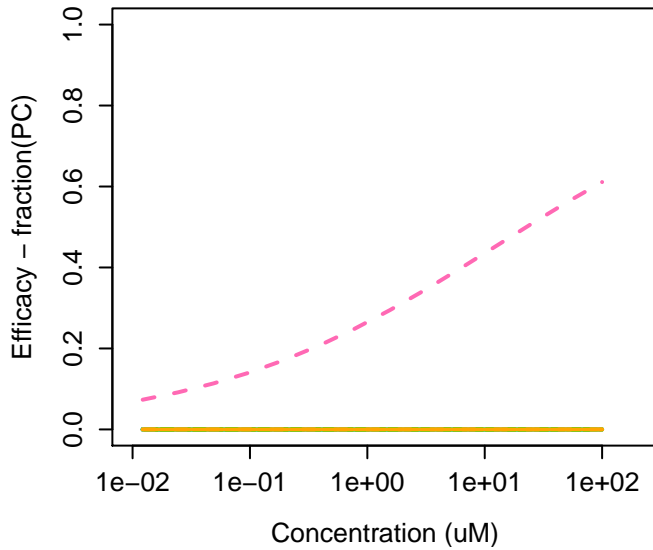

**1646-88-4 : Aldoxycarb**  
**Agonist: 0 Antagonist: 0**

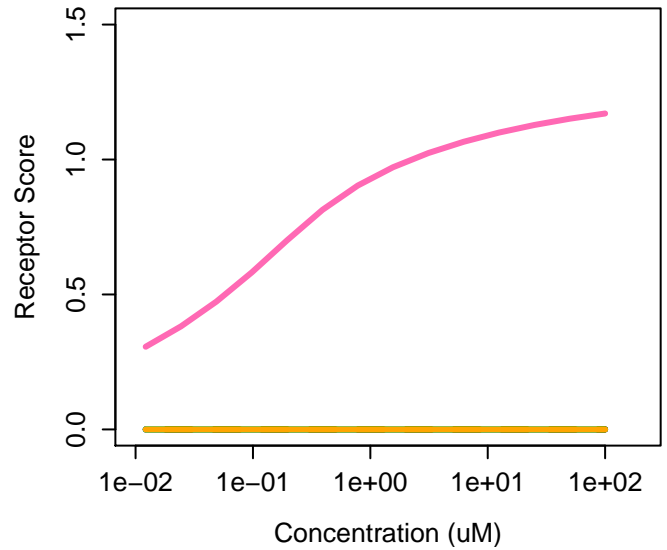

**165252-70-0 : Dinotefuran**



**165252-70-0 : Dinotefuran**  
**Agonist: 0 Antagonist: 0**



16587-71-6 : 4-(tert-Pentyl)-cyclohexanone



16587-71-6 : 4-(tert-Pentyl)-cyclohexanone  
Agonist: 0 Antagonist: 0

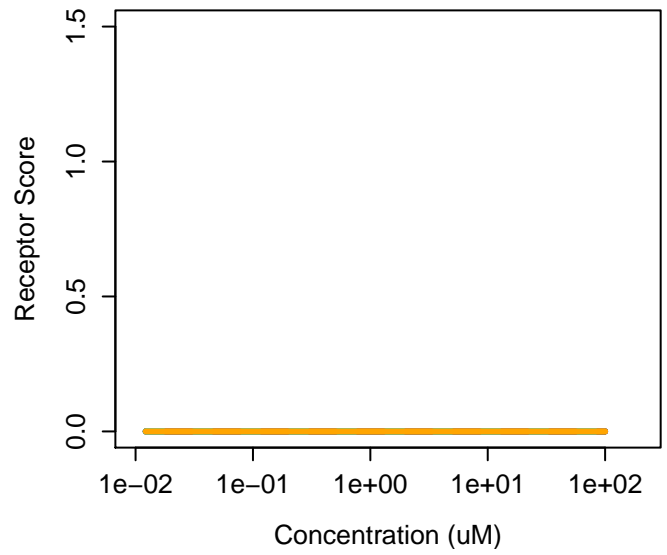

166412-78-8 : Diisononyl cyclohexane-1,2-dicarbox 166412-78-8 : Diisononyl cyclohexane-1,2-dicarbox  
Agonist: 0 Antagonist: 0



16672-87-0 : Ethephon



16672-87-0 : Ethephon  
Agonist: 0 Antagonist: 0



1671-75-6 : Heptanophenone



1671-75-6 : Heptanophenone  
Agonist: 0 Antagonist: 0



16752-77-5 : Methomyl

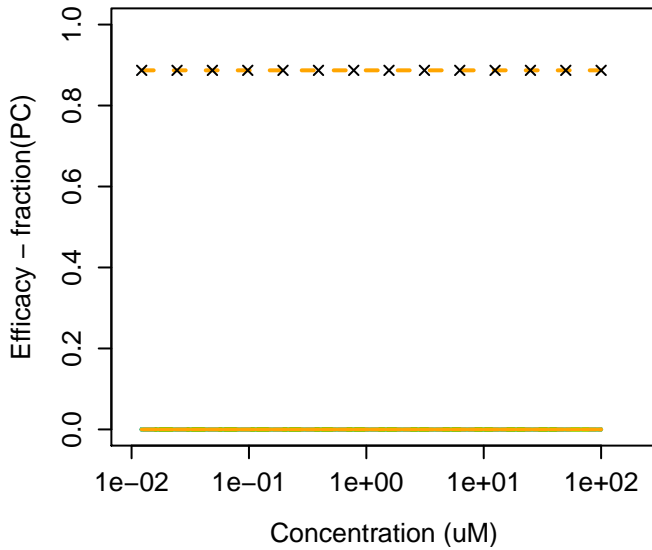

16752-77-5 : Methomyl  
Agonist: 0 Antagonist: 0



1675-54-3 : Bisphenol A diglycidyl ether

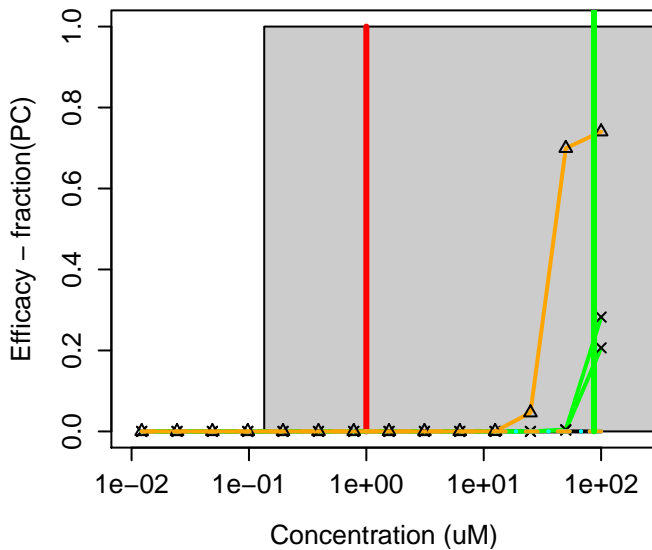

1675-54-3 : Bisphenol A diglycidyl ether  
Agonist: 0 Antagonist: 0.024

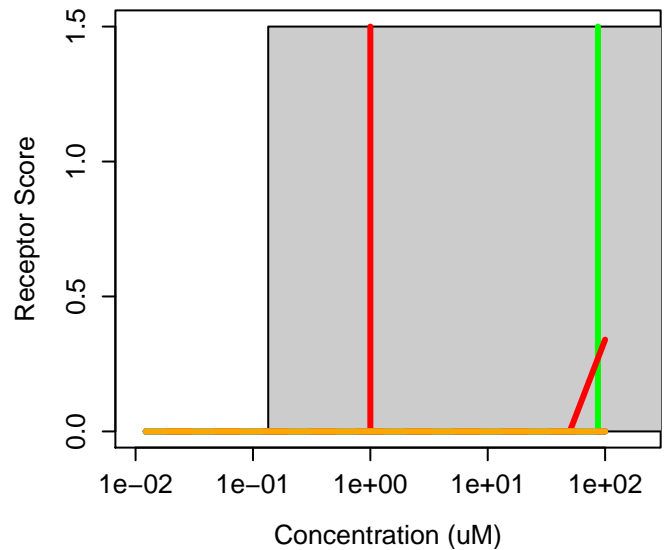

16893-85-9 : Sodium hexafluorosilicate

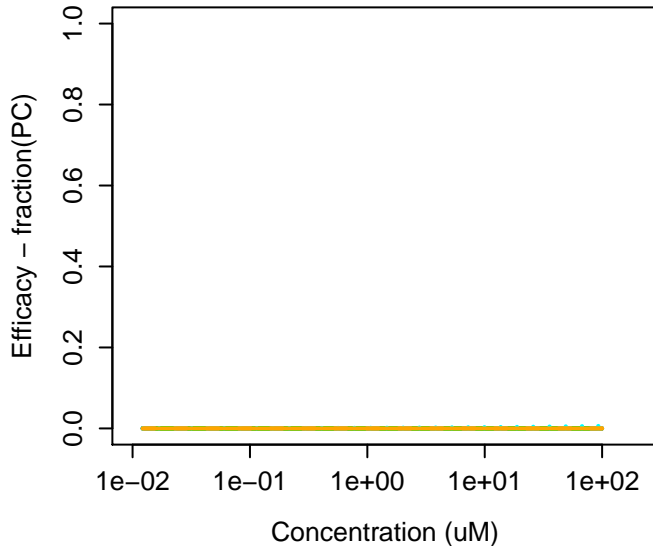

16893-85-9 : Sodium hexafluorosilicate  
Agonist: 0 Antagonist: 0

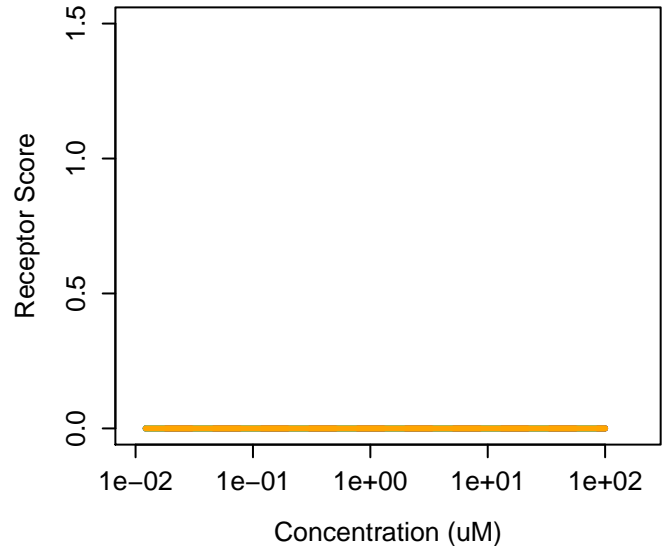

1689-84-5 : Bromoxynil

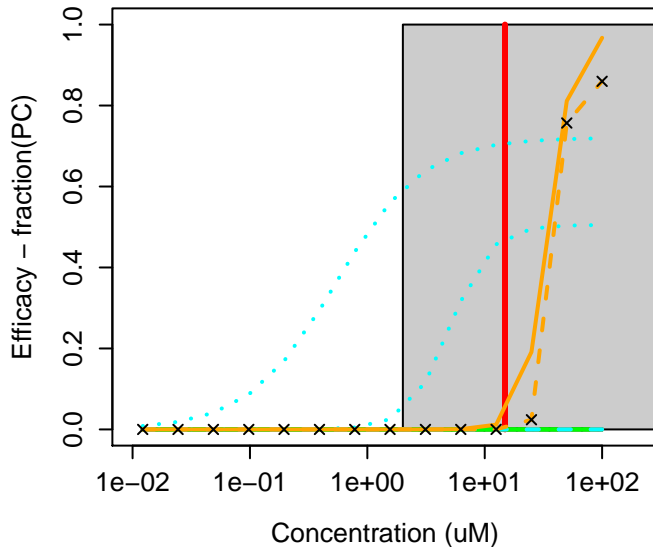

1689-84-5 : Bromoxynil  
Agonist: 0 Antagonist: 3.2e-05

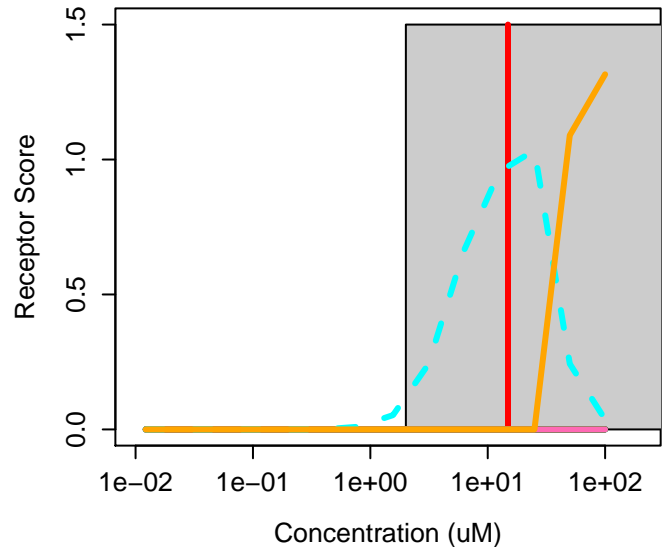

169590-42-5 : Celecoxib

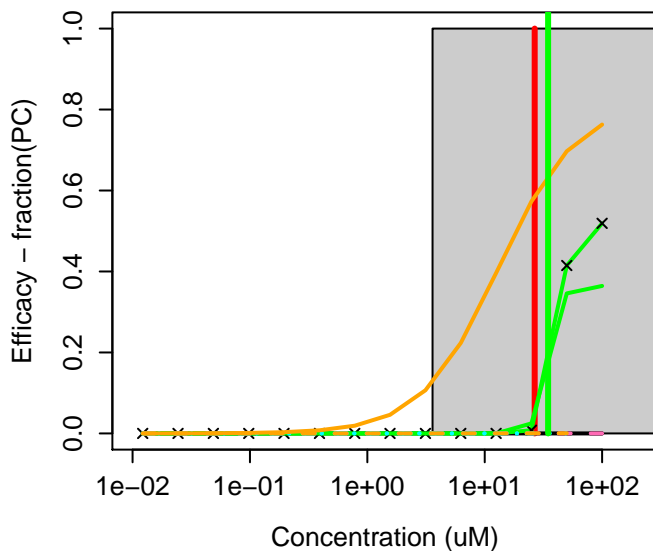

169590-42-5 : Celecoxib  
Agonist: 0 Antagonist: 0.074

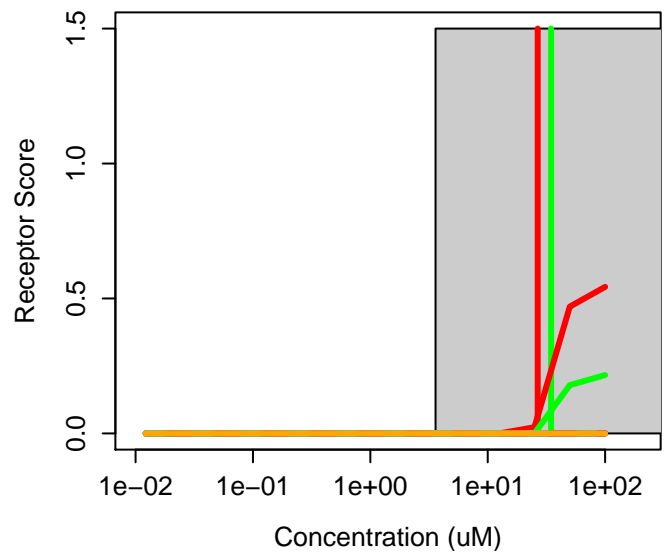

**1698-60-8 : Chloridazon**



**1698-60-8 : Chloridazon  
Agonist: 0 Antagonist: 0**



**1702-17-6 : Clopyralid**



**1702-17-6 : Clopyralid  
Agonist: 0 Antagonist: 0**



**171866-31-2 : CP-283097**

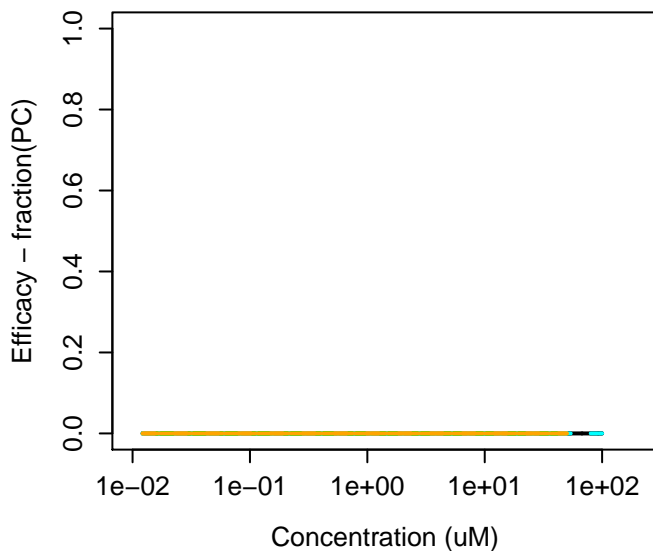

**171866-31-2 : CP-283097  
Agonist: 0 Antagonist: 0**



1724-39-6 : Cyclododecanol



1724-39-6 : Cyclododecanol  
Agonist: 0 Antagonist: 0



173584-44-6 : Indoxacarb

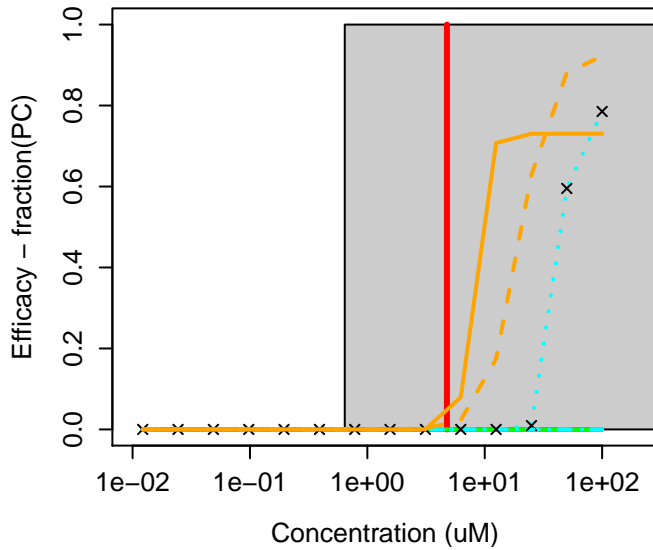

173584-44-6 : Indoxacarb  
Agonist: 0 Antagonist: 0.00013

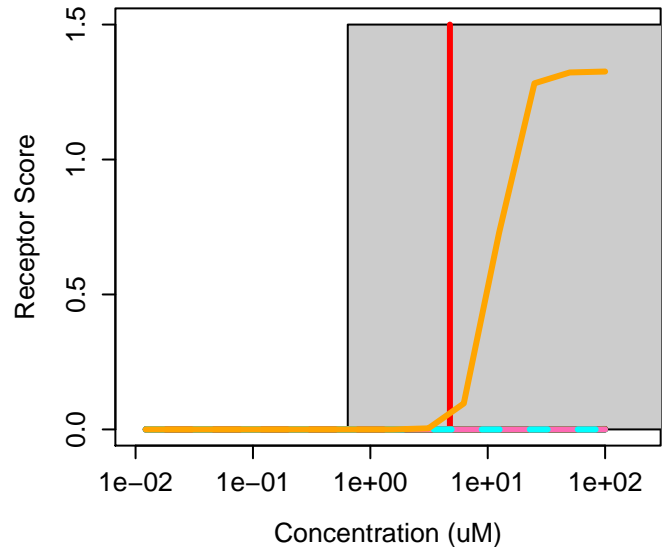

17372-87-1 : Eosin

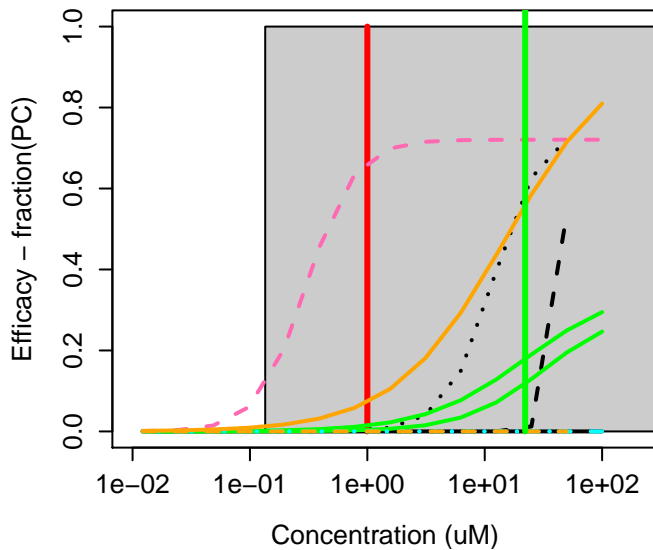

17372-87-1 : Eosin  
Agonist: 0.046 Antagonist: 0.17

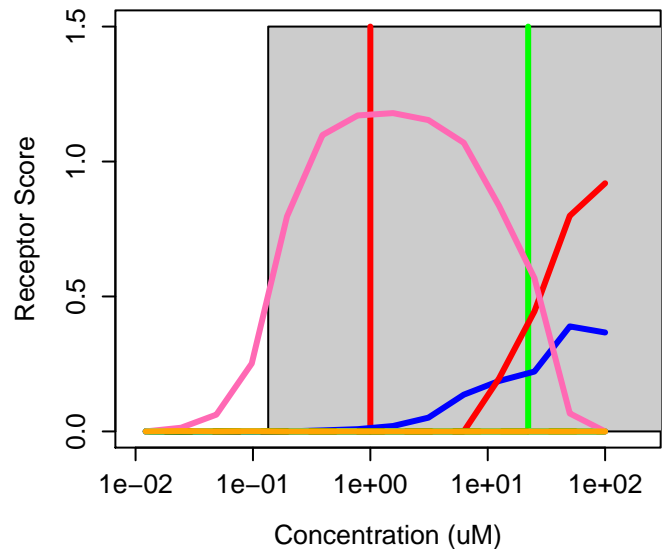

174185-16-1 : FR167356

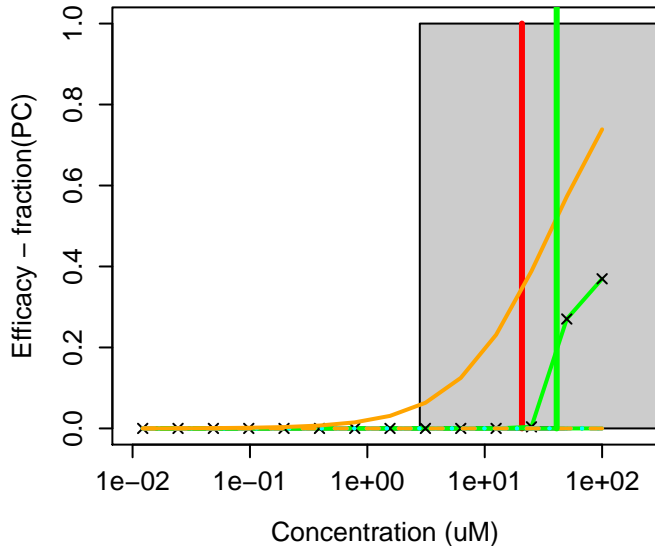

174185-16-1 : FR167356  
Agonist: 0 Antagonist: 0.032

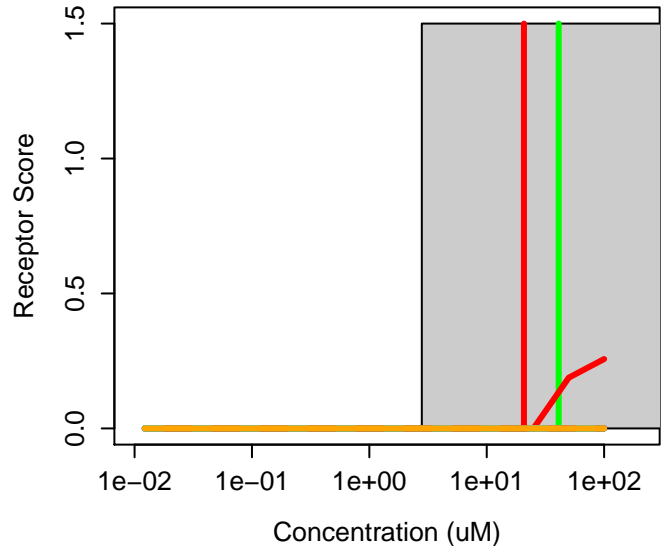

1742-14-9 : 1,1-Bis(3,4-dimethylphenyl)ethane

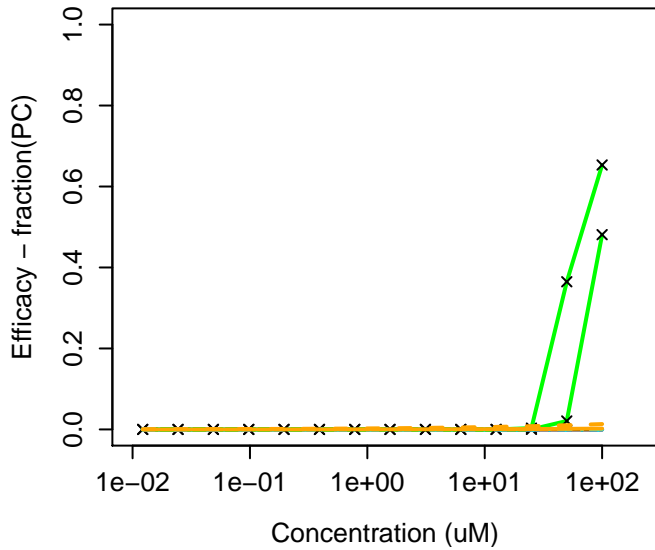

1742-14-9 : 1,1-Bis(3,4-dimethylphenyl)ethane  
Agonist: 0 Antagonist: 0.0016

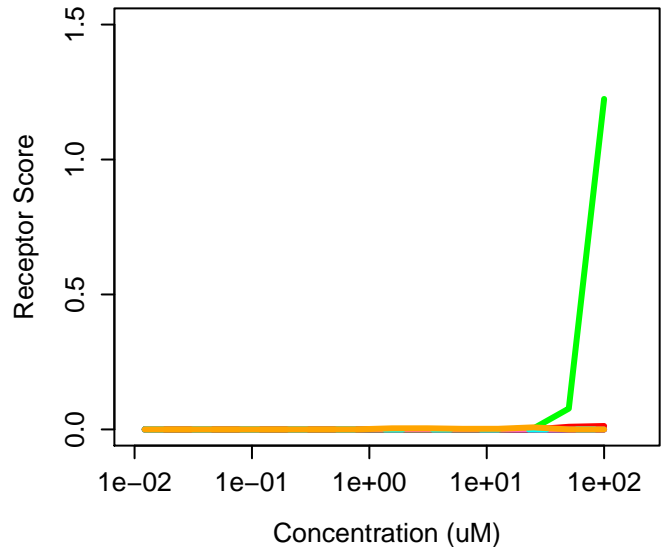

17465-86-0 : gamma-Cyclodextrin



17465-86-0 : gamma-Cyclodextrin  
Agonist: 0 Antagonist: 0





175013-18-0 : Pyraclostrobin

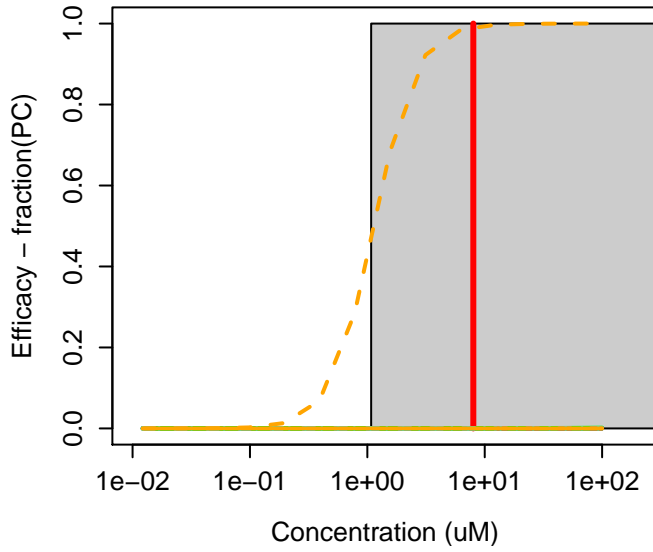

175013-18-0 : Pyraclostrobin  
Agonist: 0 Antagonist: 0

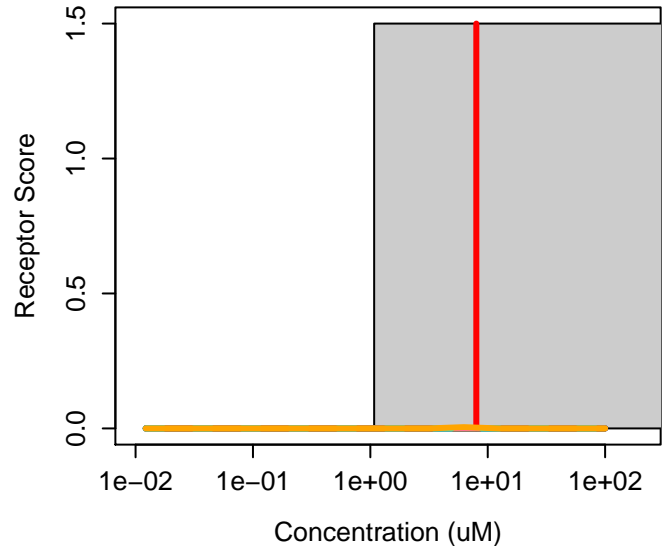

'60-24-3 : N-[3-(Trimethoxysilyl)propyl]ethane-1,2-c'60-24-3 : N-[3-(Trimethoxysilyl)propyl]ethane-1,2-c  
Agonist: 0 Antagonist: 0



1762-95-4 : Thiocyanic acid, ammonium salt



1762-95-4 : Thiocyanic acid, ammonium salt  
Agonist: 0 Antagonist: 0



1763-23-1 : PFOS

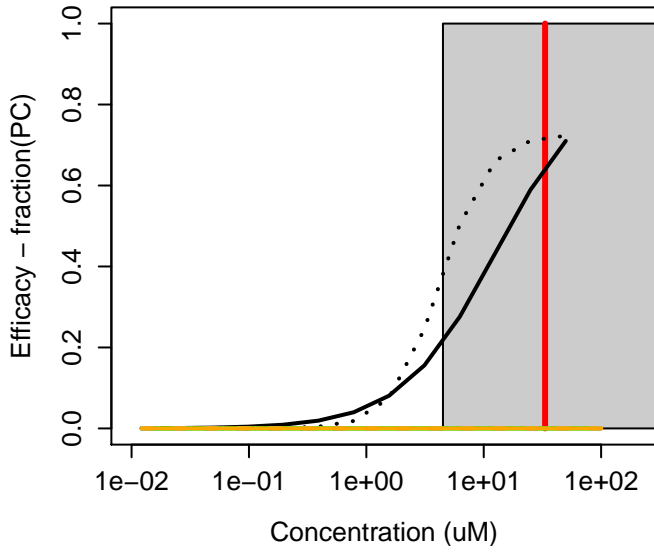

1763-23-1 : PFOS  
Agonist: 6.9e-05 Antagonist: 0.00019

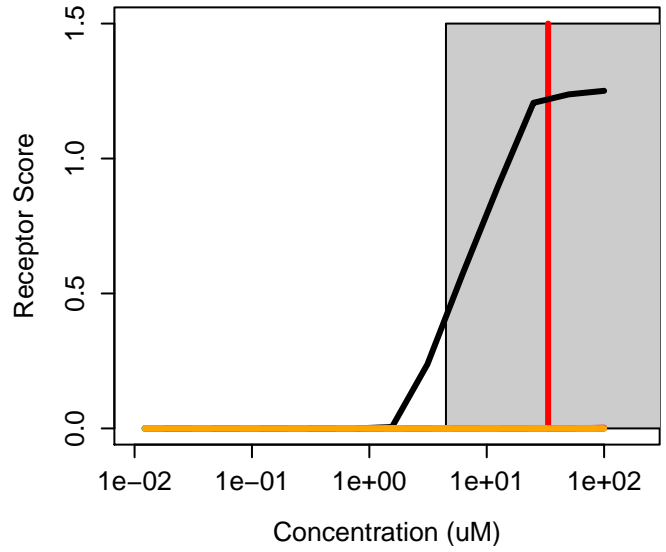

17696-62-7 : Phenylparaben

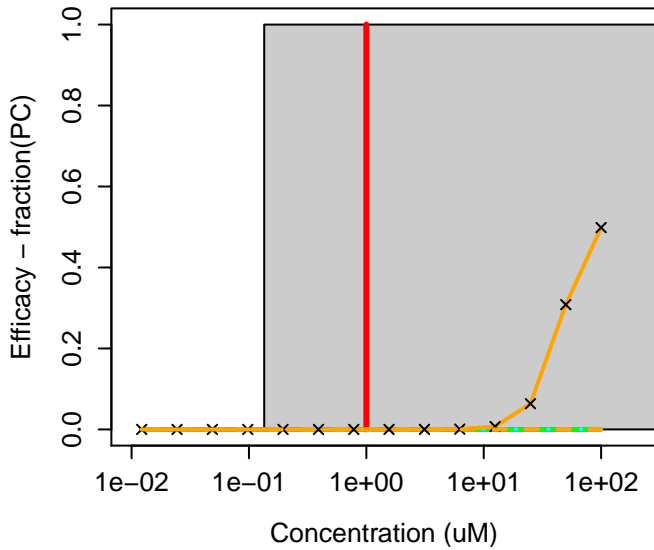

17696-62-7 : Phenylparaben  
Agonist: 0 Antagonist: 0



177785-47-6 : PharmaGSID\_47261

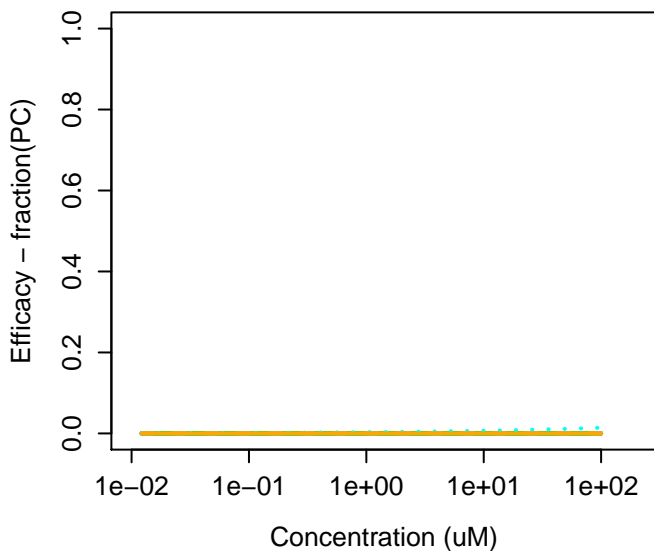

177785-47-6 : PharmaGSID\_47261  
Agonist: 0 Antagonist: 0

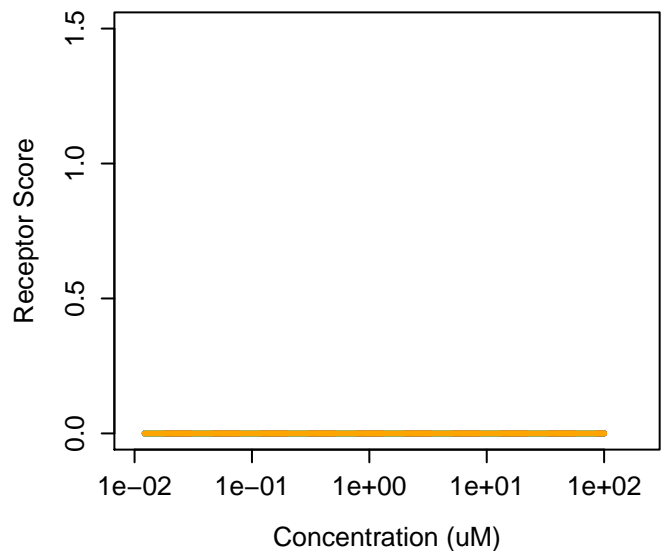

17796-82-6 : N-(Cyclohexylthio)phthalimide

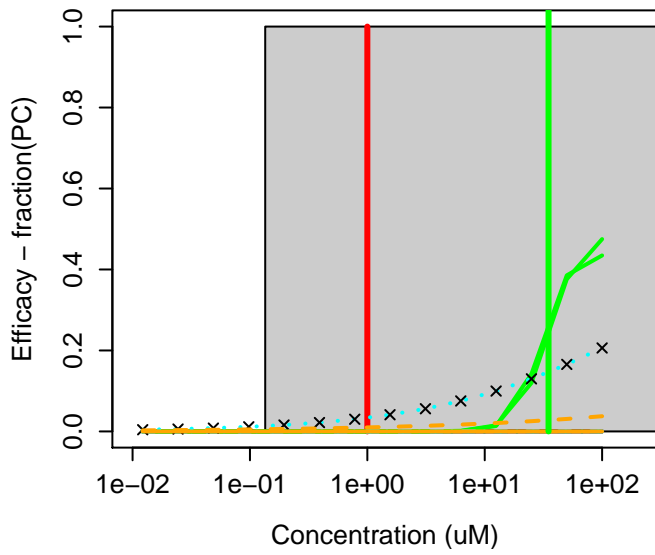

17796-82-6 : N-(Cyclohexylthio)phthalimide  
Agonist: 0.017 Antagonist: 0.00097

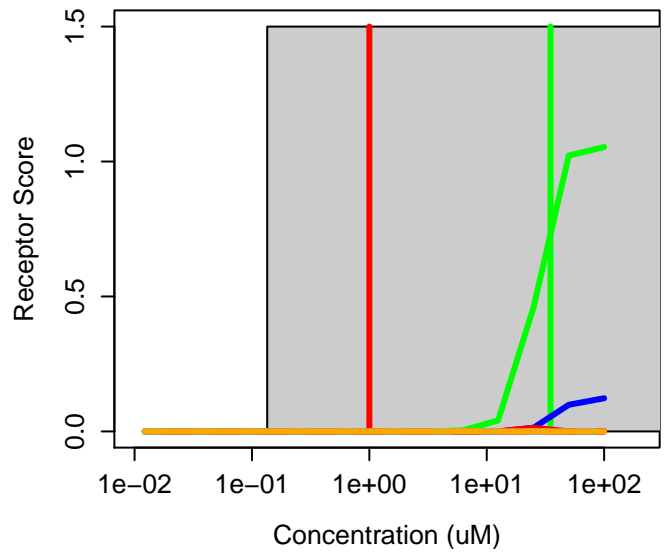

17804-35-2 : Benomyl

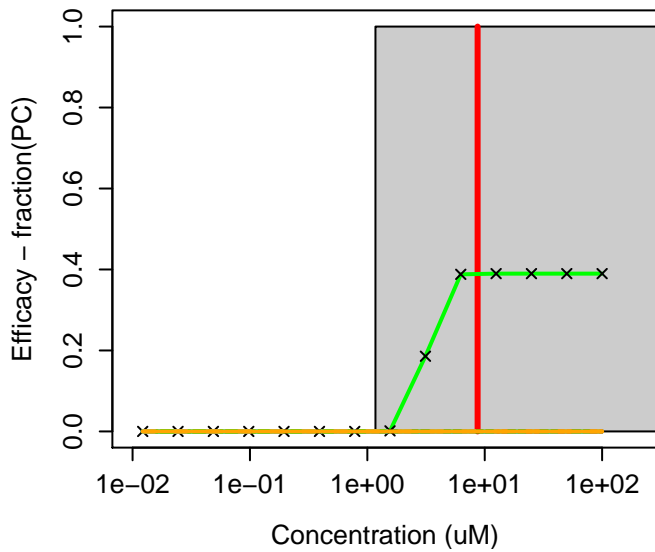

17804-35-2 : Benomyl  
Agonist: 0 Antagonist: 0

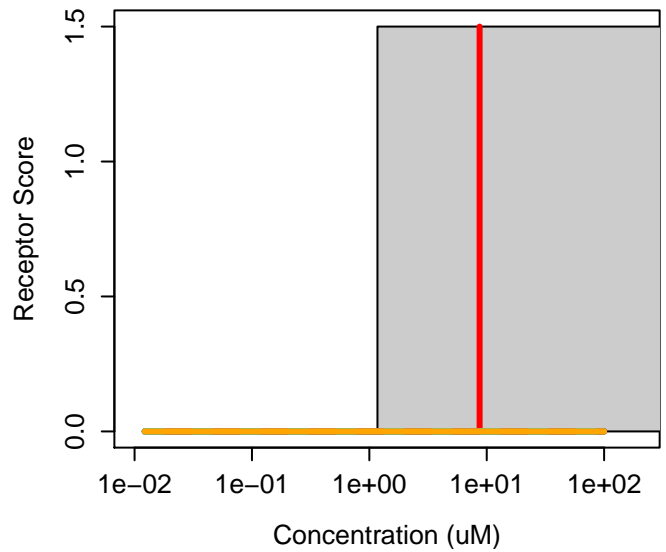

17924-92-4 : Zearalenone

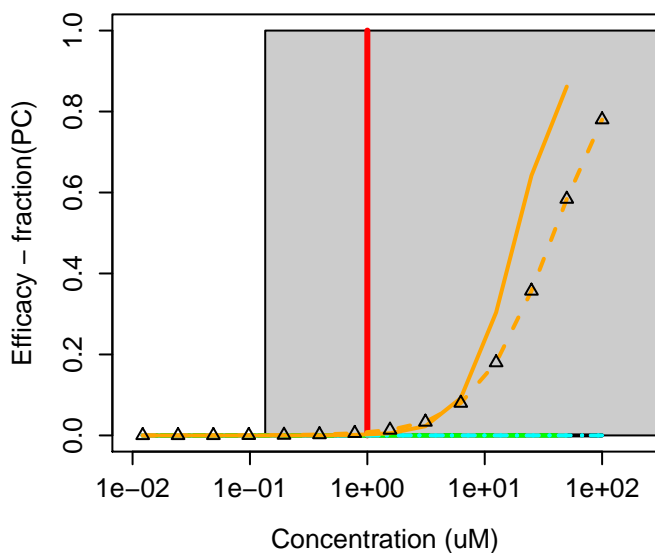

17924-92-4 : Zearalenone  
Agonist: 0 Antagonist: 0

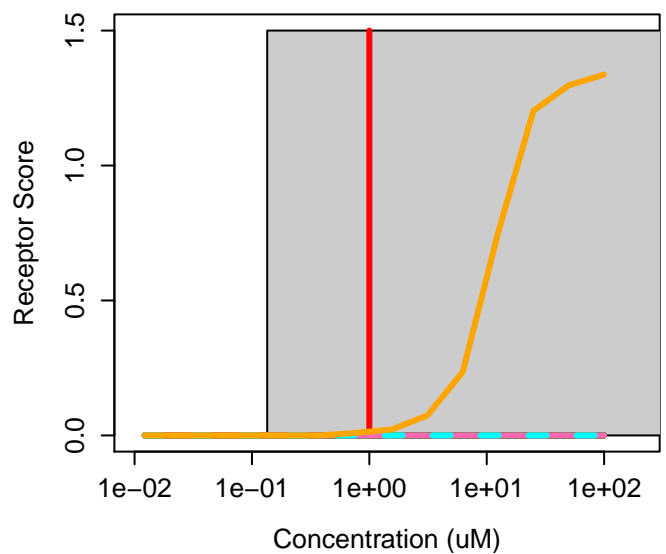

179465-71-5 : CJ-013790

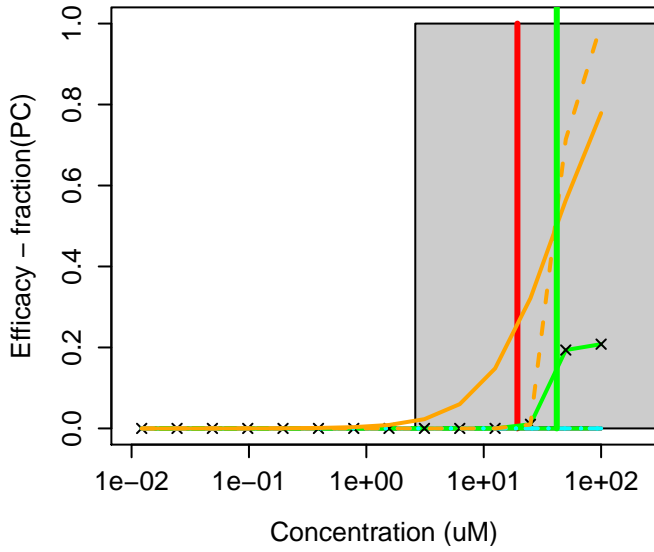

179465-71-5 : CJ-013790  
Agonist: 0 Antagonist: 0.025

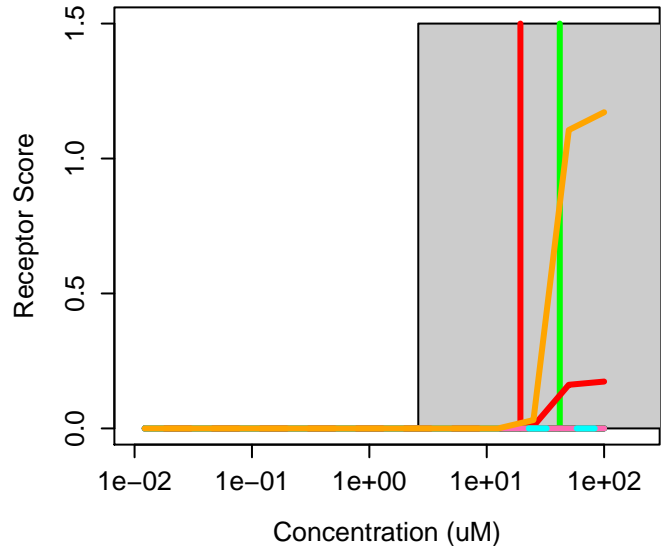

180084-01-9 : SB236057A

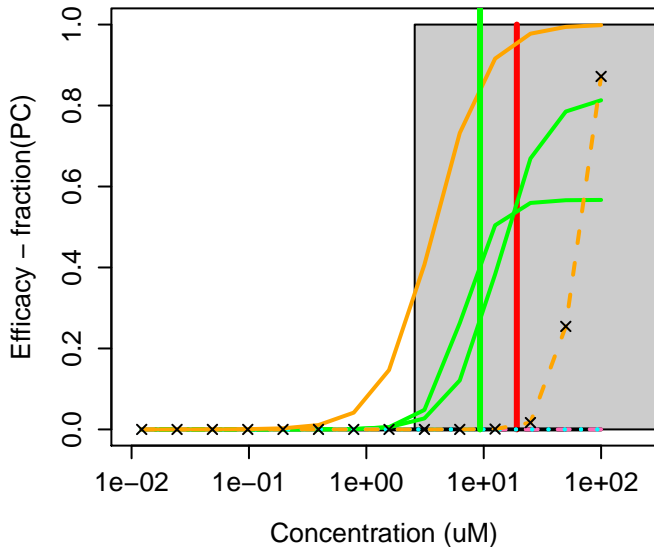

180084-01-9 : SB236057A  
Agonist: 0 Antagonist: 0.28

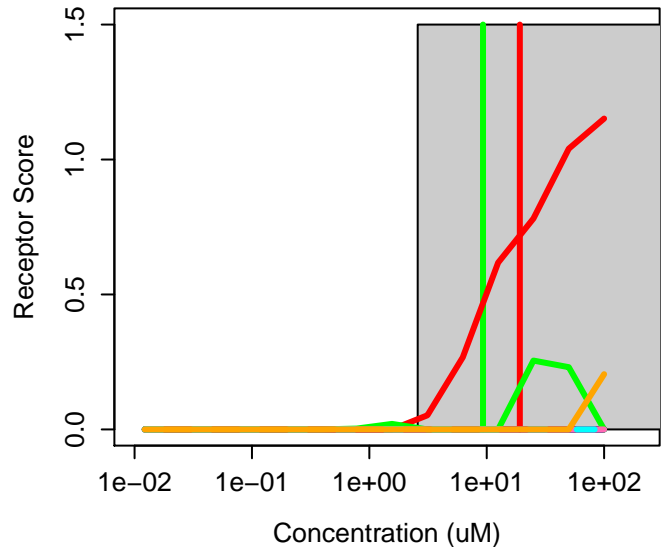

1806-26-4 : 4-Octylphenol

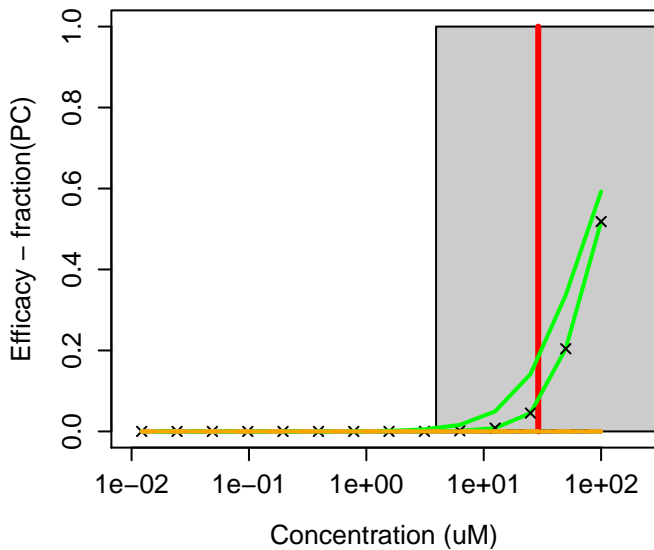

1806-26-4 : 4-Octylphenol  
Agonist: 0 Antagonist: 0

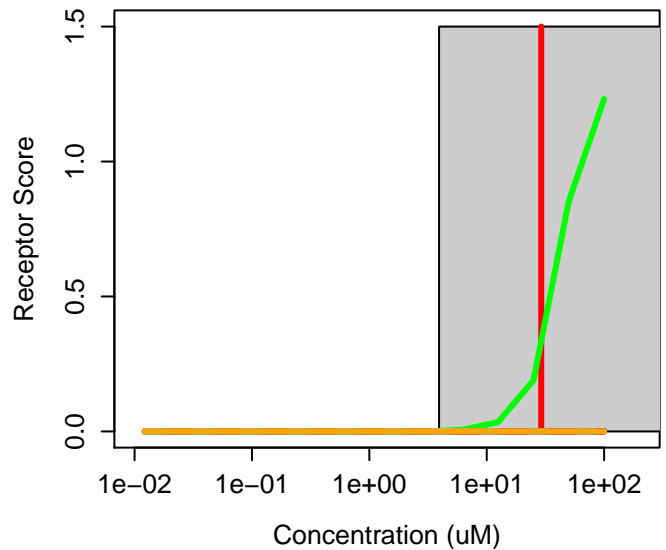

181274-15-7 : Propoxy-carbazone-sodium



181274-15-7 : Propoxy-carbazone-sodium  
Agonist: 0 Antagonist: 0



181274-17-9 : Flucarbazone-sodium



181274-17-9 : Flucarbazone-sodium  
Agonist: 0 Antagonist: 0



181640-09-5 : SR144190

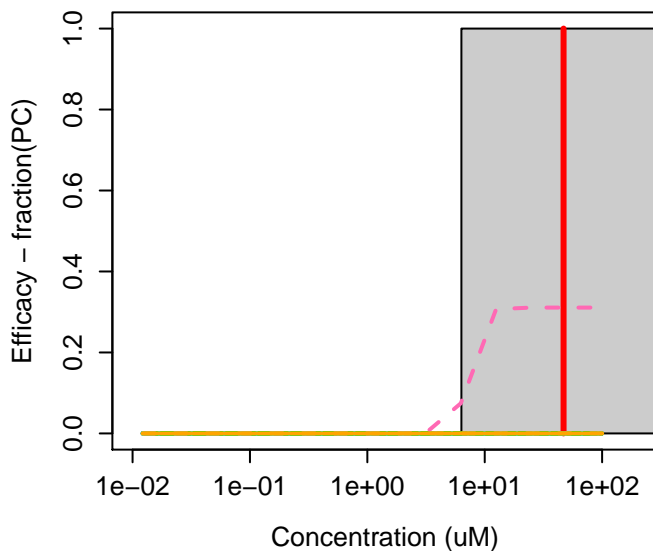

181640-09-5 : SR144190  
Agonist: 0 Antagonist: 0

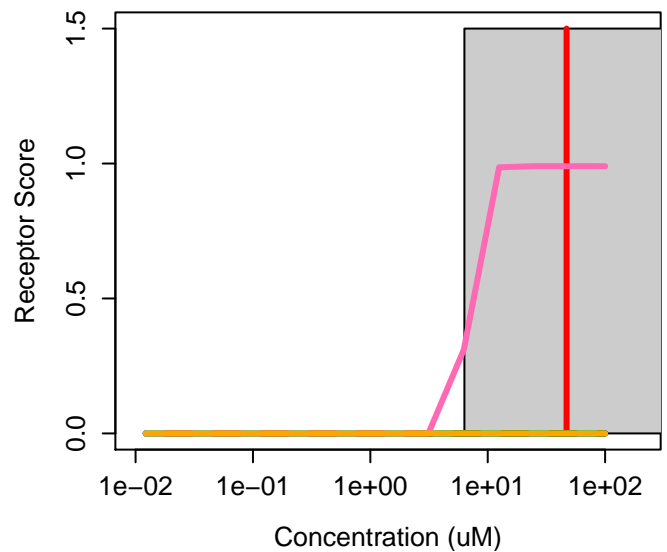

18172-67-3 : (-)-beta-Pinene



18172-67-3 : (-)-beta-Pinene  
Agonist: 0 Antagonist: 0



1825-21-4 : Pentachloroanisole



1825-21-4 : Pentachloroanisole  
Agonist: 0 Antagonist: 0



1836-75-5 : Nitrofen

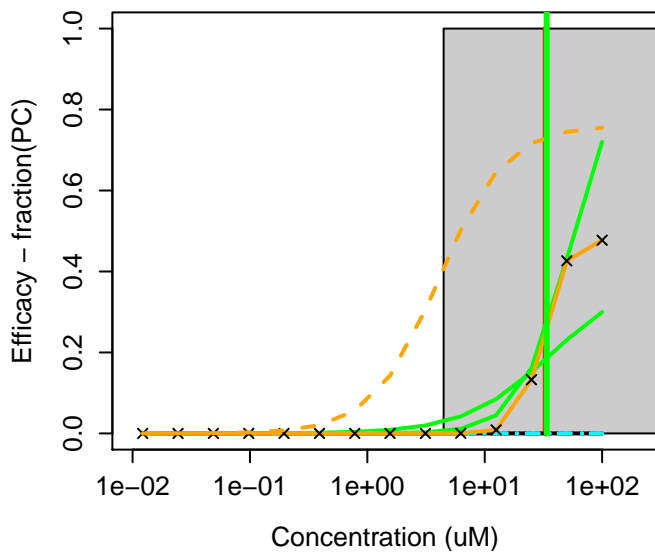

1836-75-5 : Nitrofen  
Agonist: 0 Antagonist: 0.13

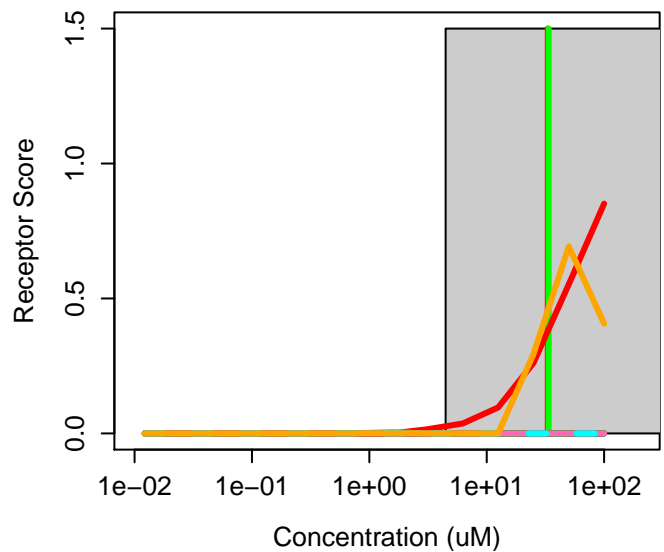

1843-05-6 : Octabenzone

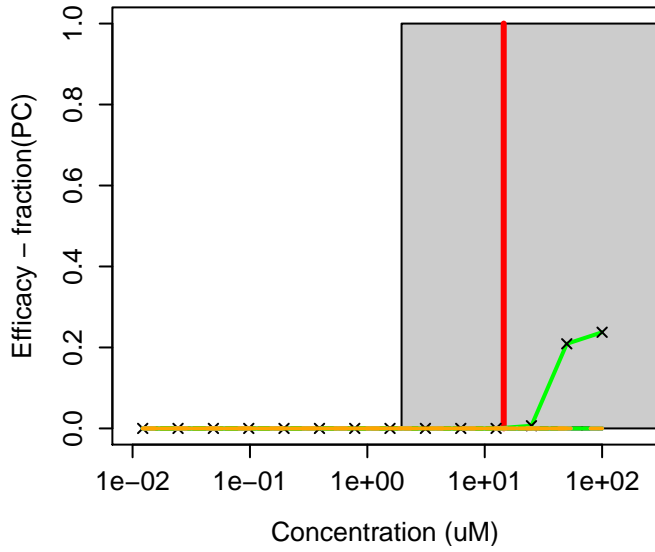

1843-05-6 : Octabenzone  
Agonist: 0 Antagonist: 0

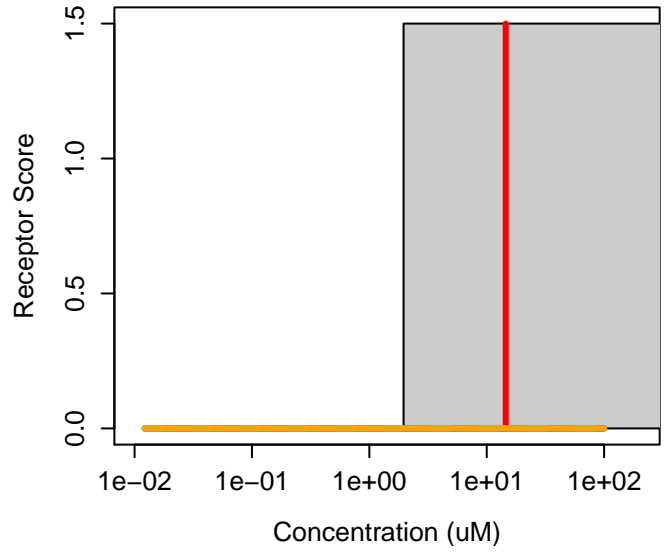

184653-84-7 : Carabersat



184653-84-7 : Carabersat  
Agonist: 0 Antagonist: 0



1861-32-1 : Chlorthal-dimethyl

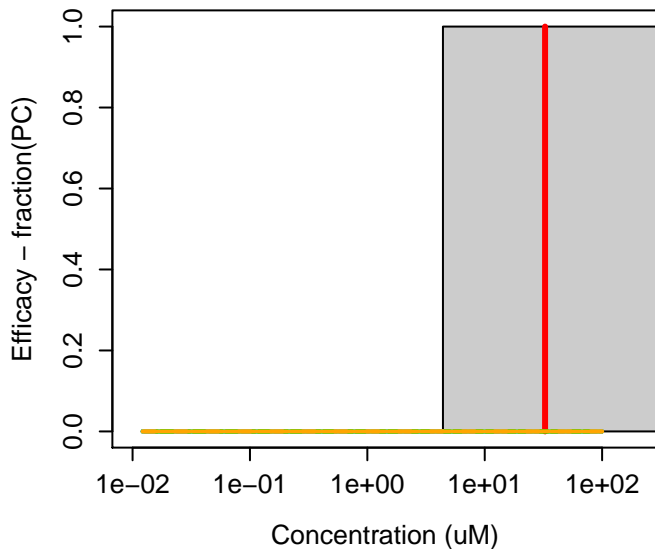

1861-32-1 : Chlorthal-dimethyl  
Agonist: 0 Antagonist: 0

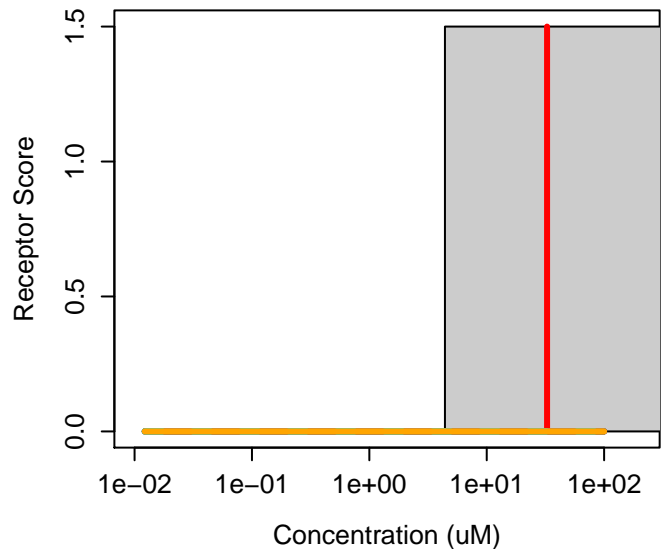

1861-40-1 : Benfluralin

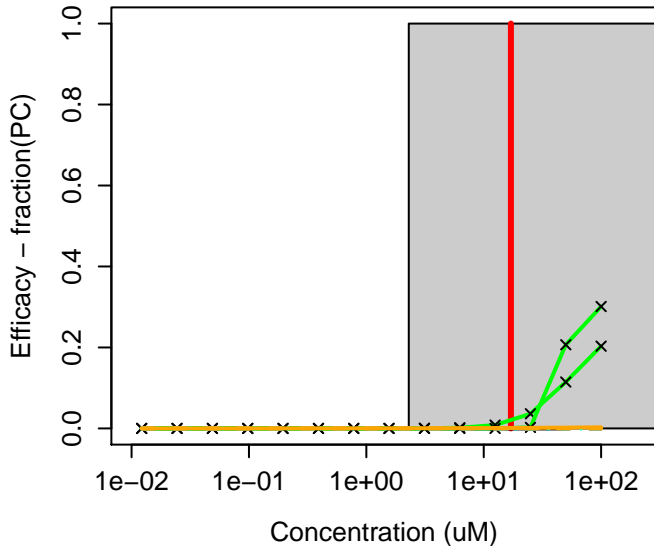

1861-40-1 : Benfluralin  
Agonist: 0 Antagonist: 0.00012

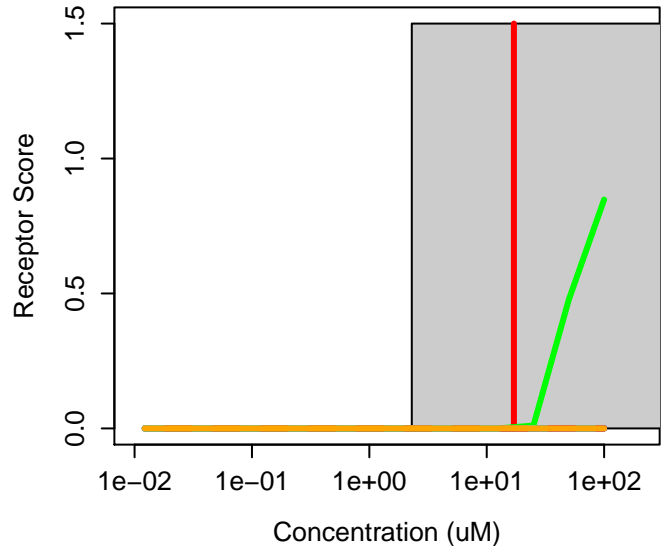

186392-65-4 : Ingliforib

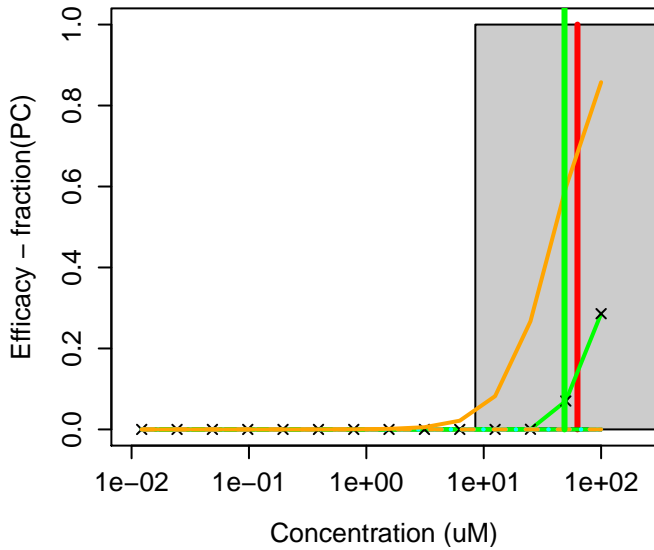

186392-65-4 : Ingliforib  
Agonist: 0 Antagonist: 0.018

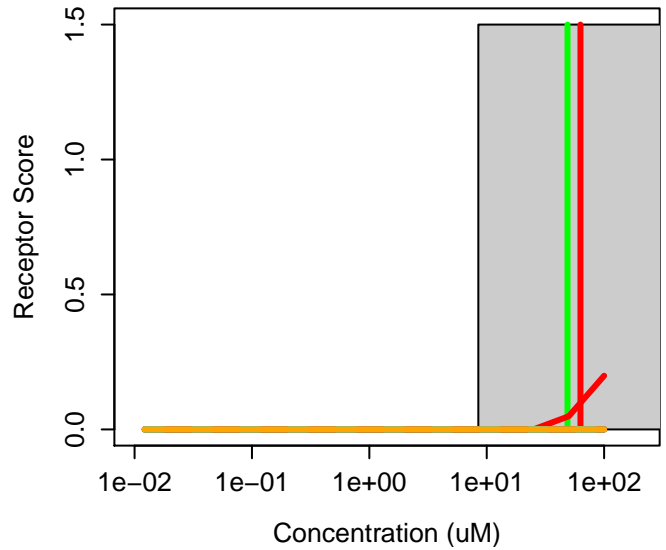

1873-88-7 : 1,1,1,3,5,5,5-Heptamethyltrisiloxane



1873-88-7 : 1,1,1,3,5,5,5-Heptamethyltrisiloxane  
Agonist: 0 Antagonist: 0





188425-85-6 : Boscalid

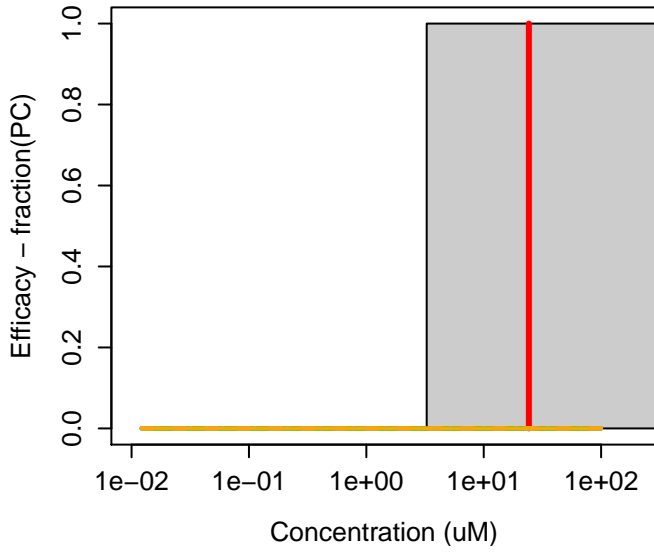

188425-85-6 : Boscalid  
Agonist: 0 Antagonist: 0

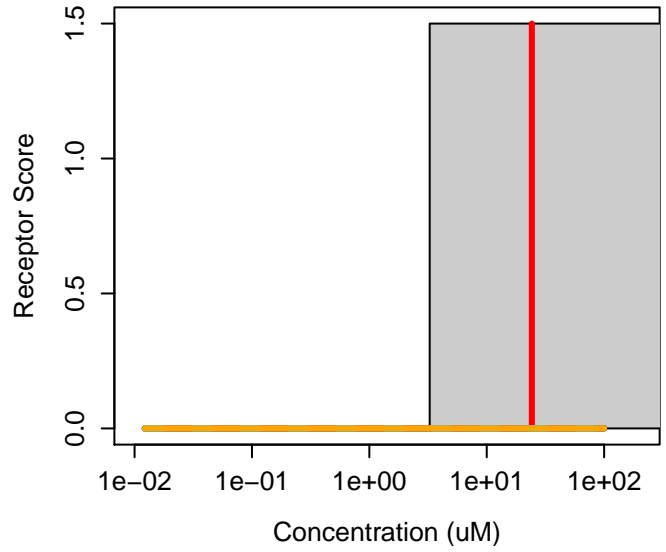

188489-07-8 : Flufenpyr-ethyl



188489-07-8 : Flufenpyr-ethyl  
Agonist: 0 Antagonist: 0



189003-92-7 : Trelanserlin

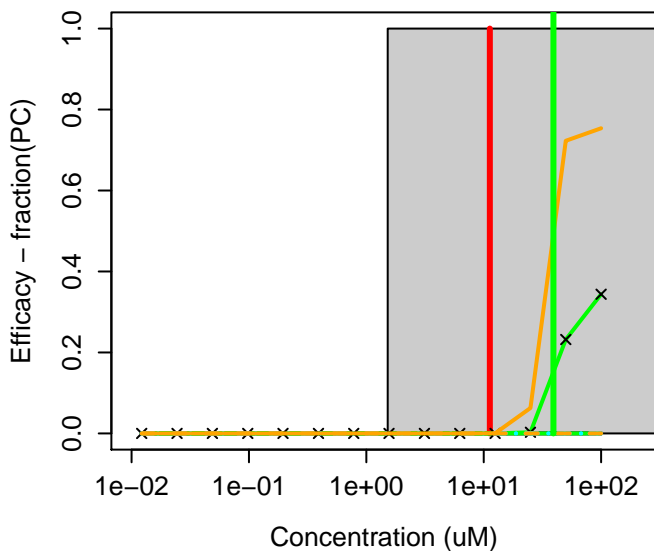

189003-92-7 : Trelanserlin  
Agonist: 0 Antagonist: 0.029

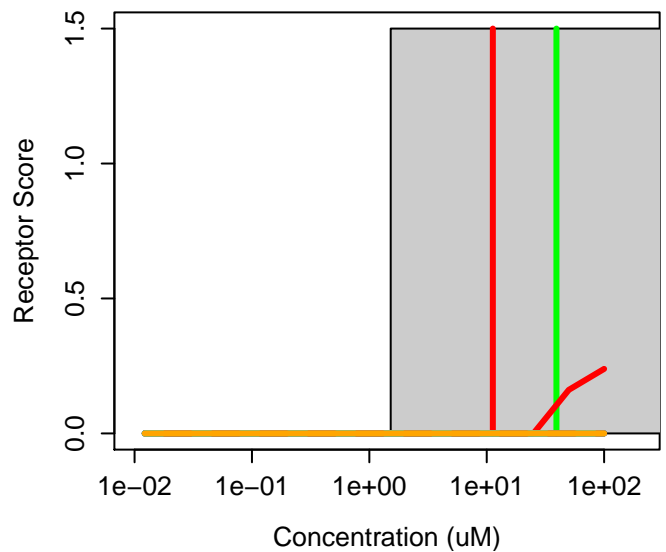

18924-66-8 : 2,2'-(Tetradecylimino)diethanol

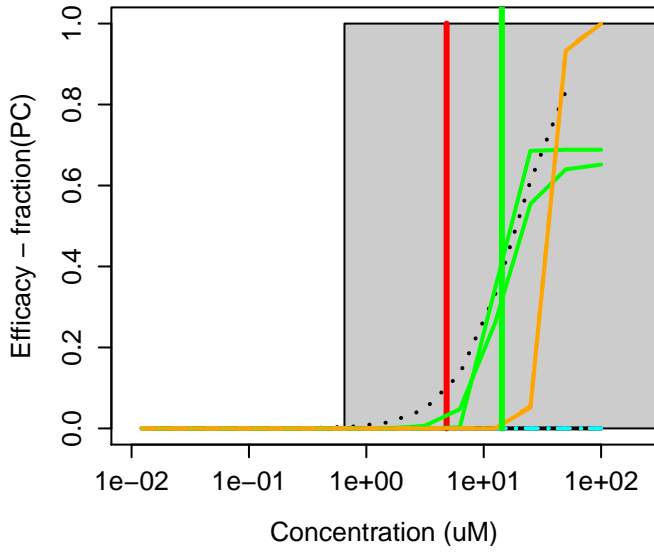

18924-66-8 : 2,2'-(Tetradecylimino)diethanol  
Agonist: 0.016 Antagonist: 0.25

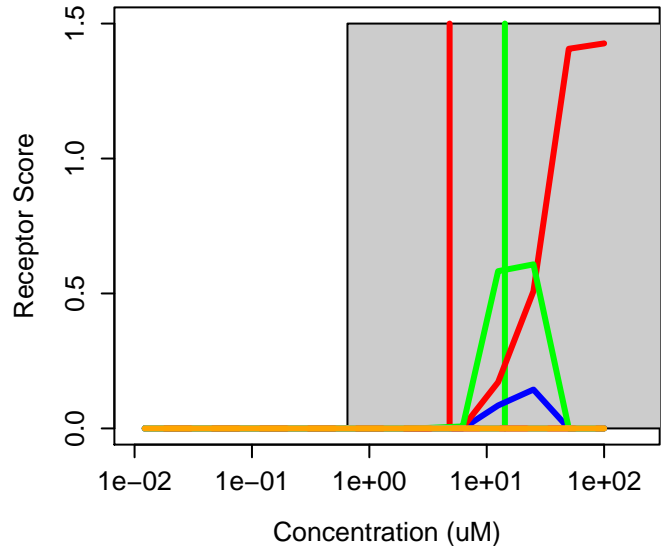

1897-45-6 : Chlorothalonil

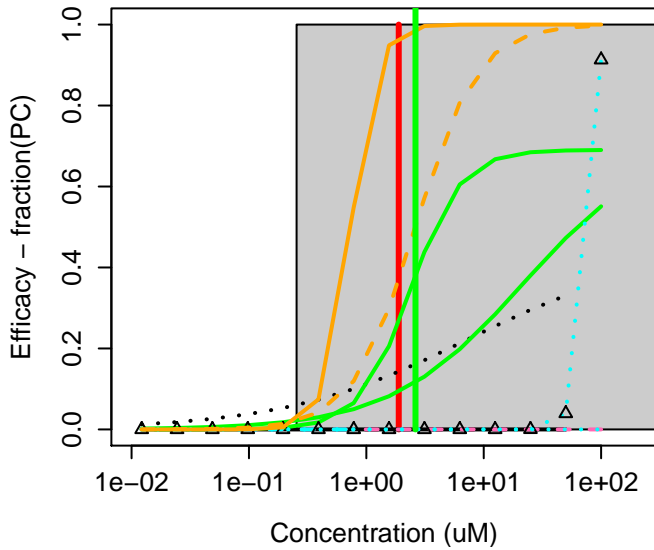

1897-45-6 : Chlorothalonil  
Agonist: 0 Antagonist: 0.48

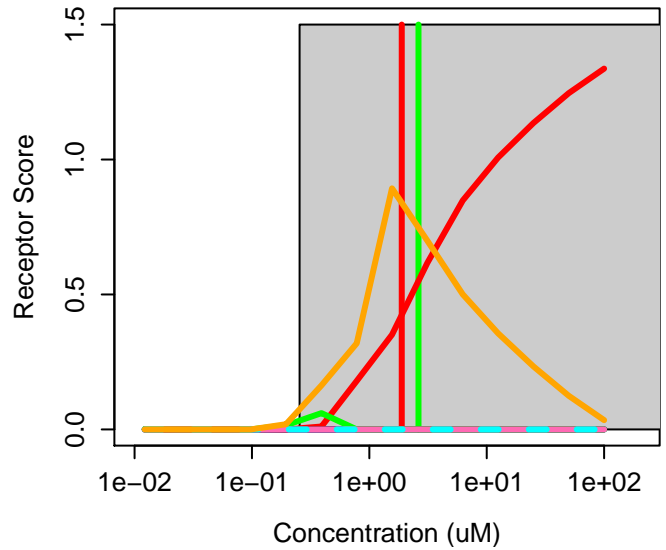

18979-55-0 : 4-(Hexyloxy)phenol

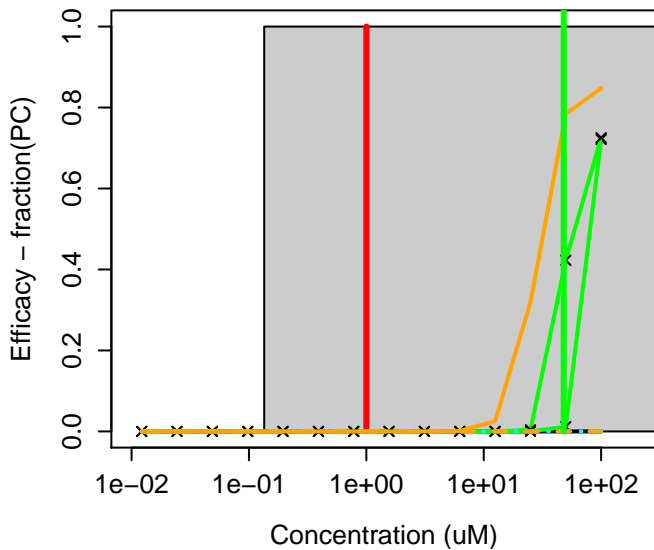

18979-55-0 : 4-(Hexyloxy)phenol  
Agonist: 0 Antagonist: 0.072

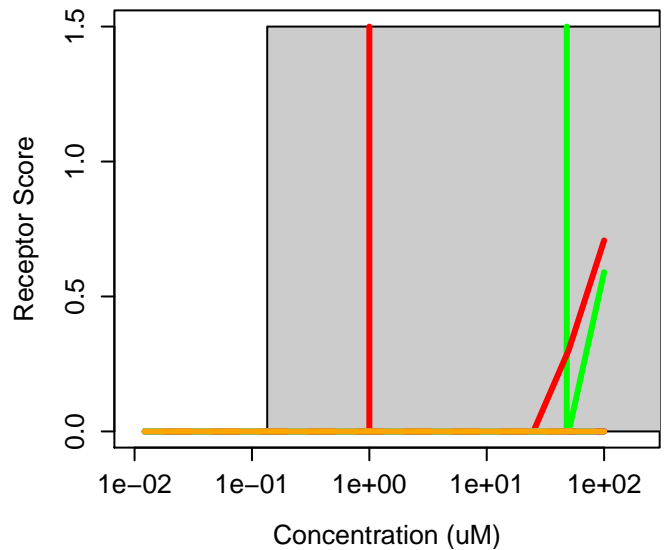

19044-88-3 : Oryzalin

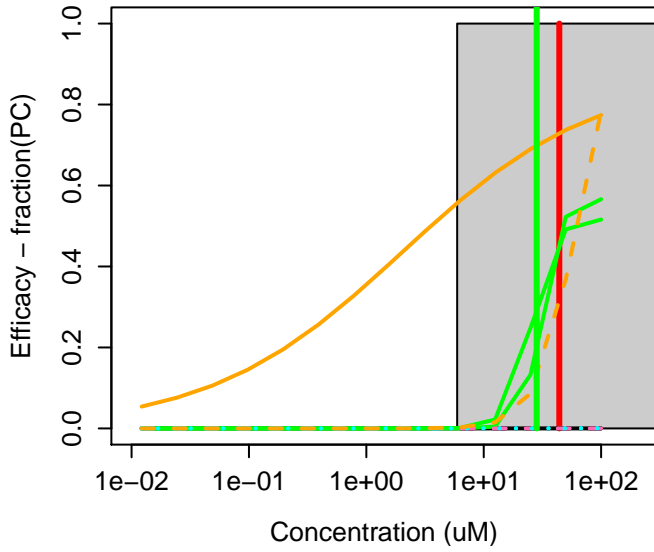

19044-88-3 : Oryzalin  
Agonist: 0 Antagonist: 0.15

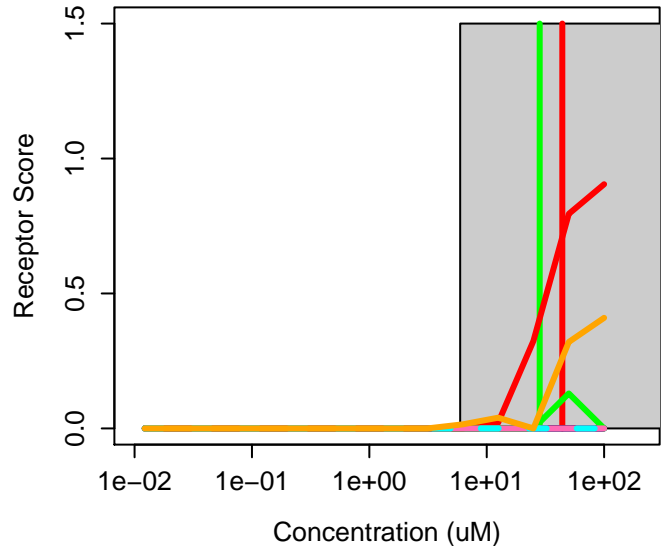

1907-65-9 : N-Butyl-p-toluenesulfonamide

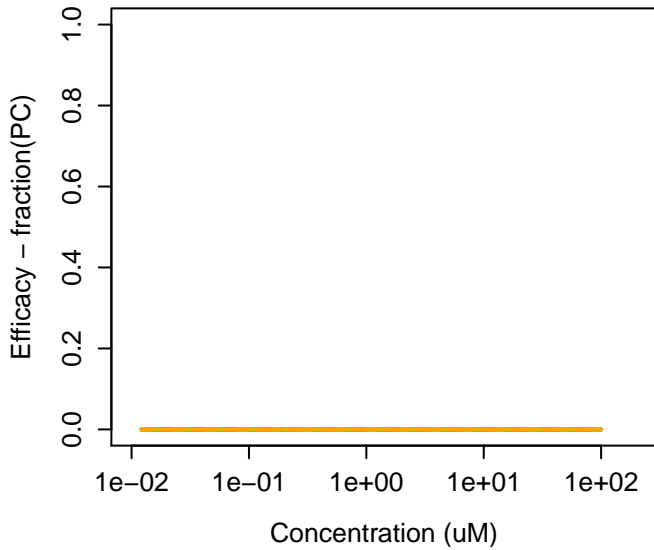

1907-65-9 : N-Butyl-p-toluenesulfonamide  
Agonist: 0 Antagonist: 0



1912-24-9 : Atrazine

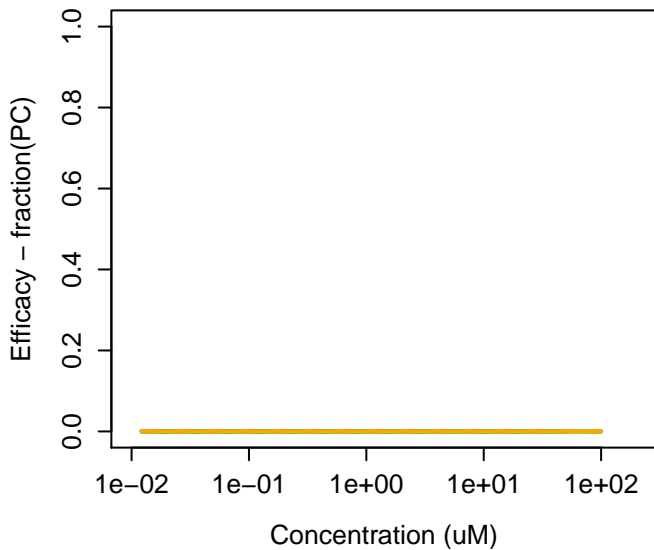

1912-24-9 : Atrazine  
Agonist: 0 Antagonist: 0



1918-00-9 : Dicamba



1918-00-9 : Dicamba  
Agonist: 0 Antagonist: 0



1918-02-1 : Picloram



1918-02-1 : Picloram  
Agonist: 0 Antagonist: 0



1918-16-7 : Propachlor

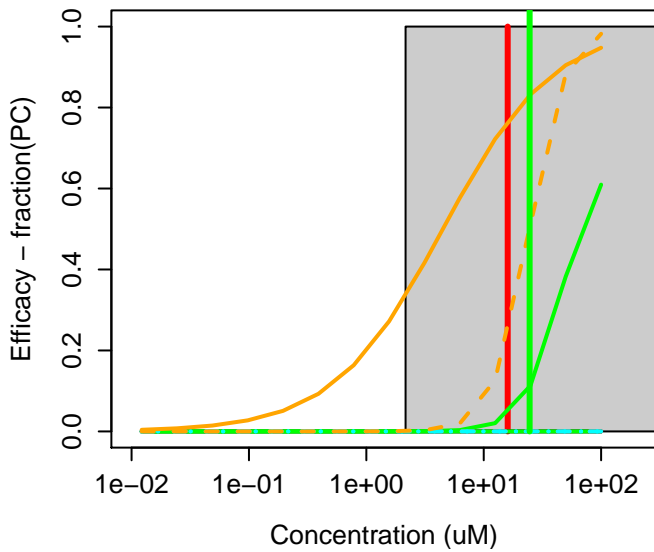

1918-16-7 : Propachlor  
Agonist: 0 Antagonist: 0.067

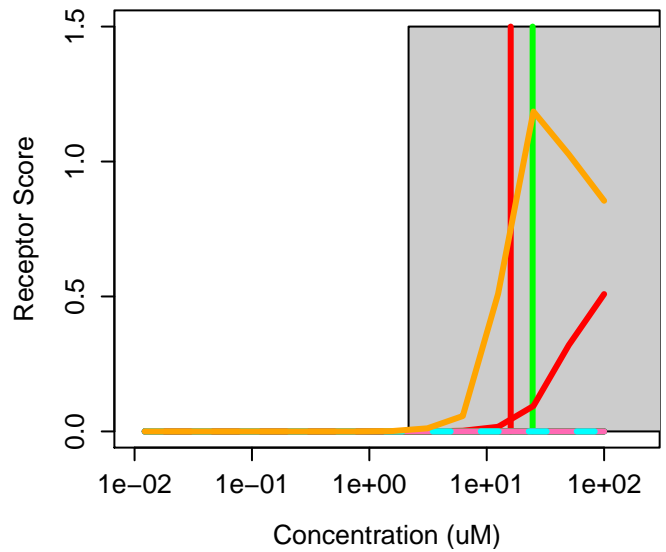

**1929-73-3 : 2,4-D-Butotyl**



**1929-73-3 : 2,4-D-Butotyl**  
**Agonist: 0 Antagonist: 0**



**1929-77-7 : Vernolate**



**1929-77-7 : Vernolate**  
**Agonist: 0 Antagonist: 0**



**1929-82-4 : Nitrapyrin**



**1929-82-4 : Nitrapyrin**  
**Agonist: 0 Antagonist: 0**



1934-21-0 : FD&C Yellow 5

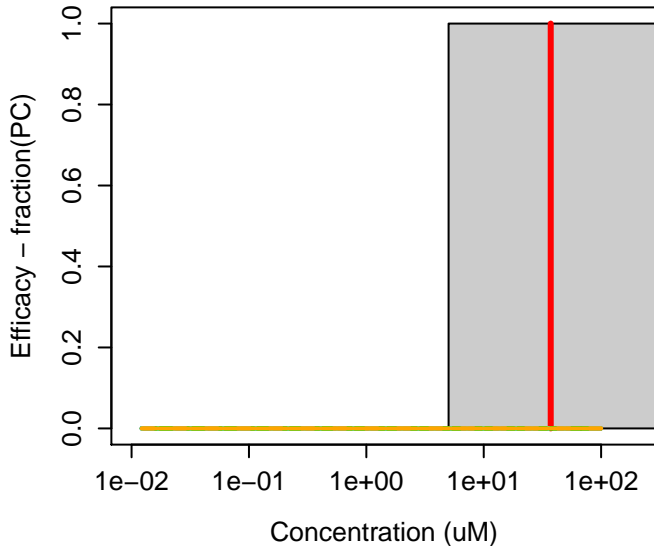

1934-21-0 : FD&C Yellow 5  
Agonist: 0 Antagonist: 0

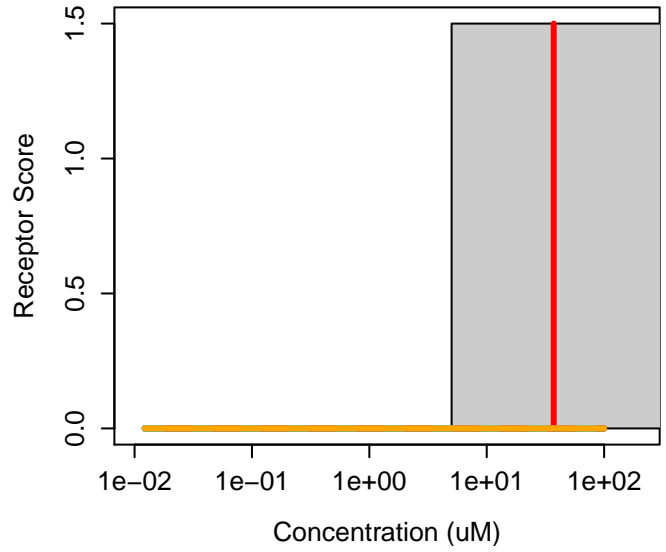

1936-15-8 : C.I. Acid Orange 10



1936-15-8 : C.I. Acid Orange 10  
Agonist: 0 Antagonist: 0



194098-25-4 : CP-409092



194098-25-4 : CP-409092  
Agonist: 0 Antagonist: 0



1948-33-0 : tert-Butylhydroquinone

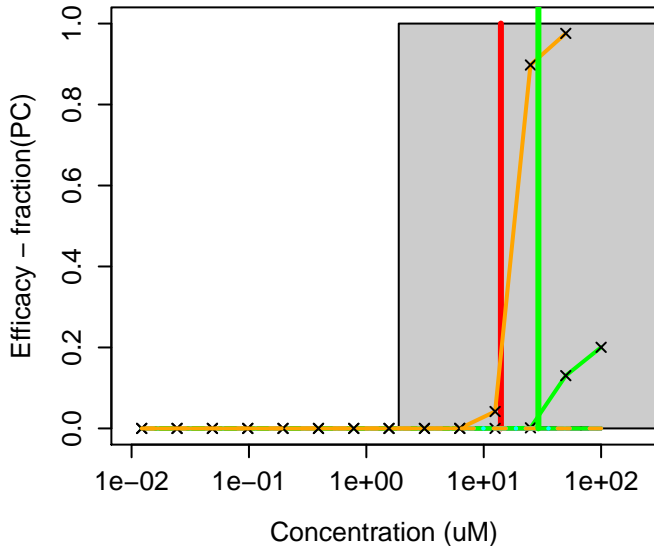

1948-33-0 : tert-Butylhydroquinone  
Agonist: 0 Antagonist: 0.016

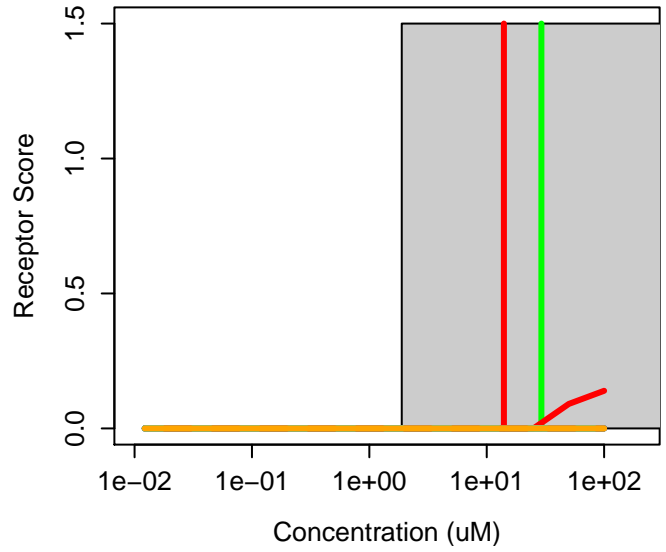

19666-30-9 : Oxadiazon

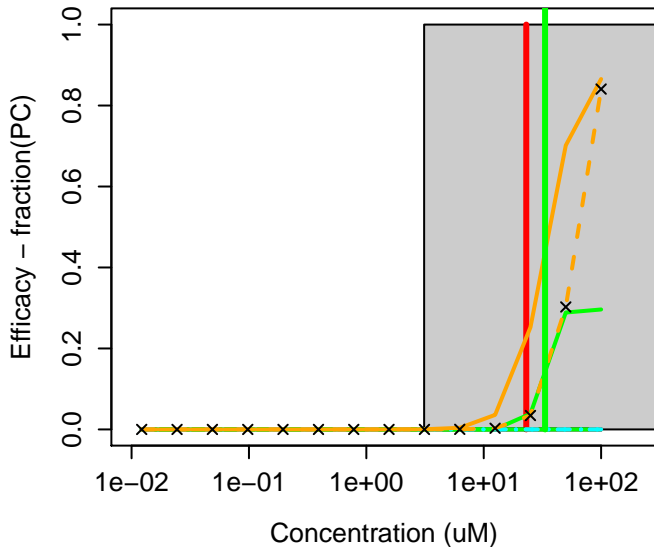

19666-30-9 : Oxadiazon  
Agonist: 0 Antagonist: 0.037

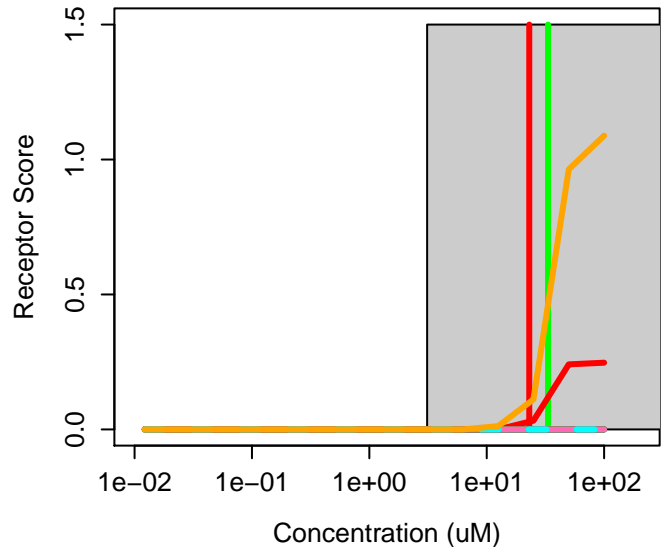

196808-45-4 : Farglitazar

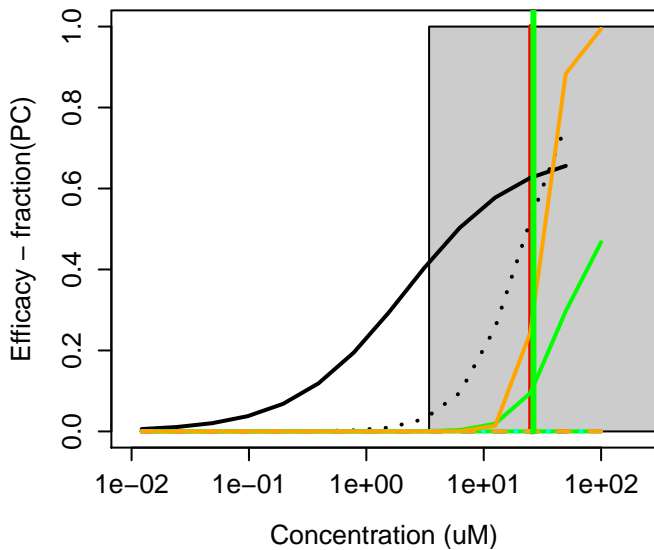

196808-45-4 : Farglitazar  
Agonist: 0 Antagonist: 0.21

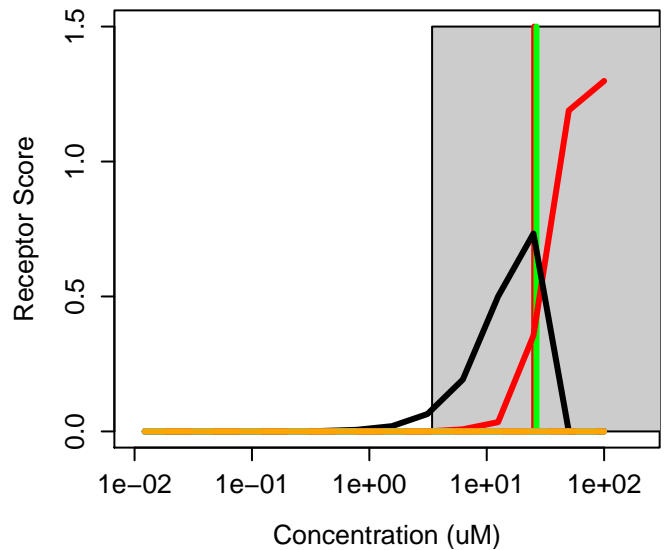

197077-55-7 : UK-333747



197077-55-7 : UK-333747  
Agonist: 0 Antagonist: 0



19774-82-4 : Amiodarone hydrochloride

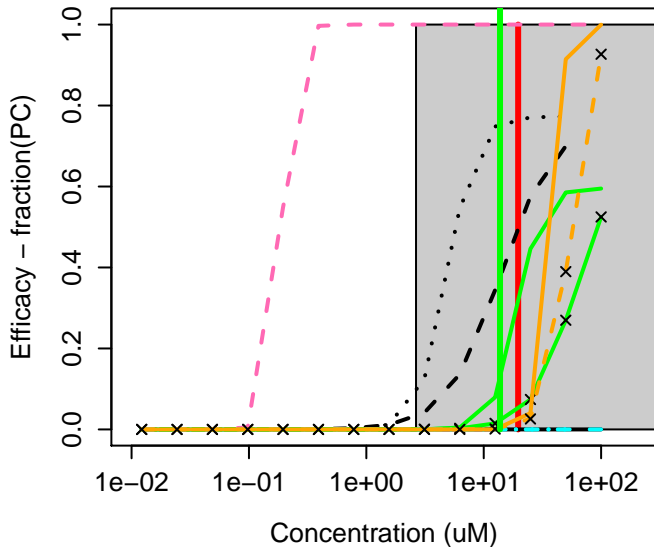

19774-82-4 : Amiodarone hydrochloride  
Agonist: 0.13 Antagonist: 0.19

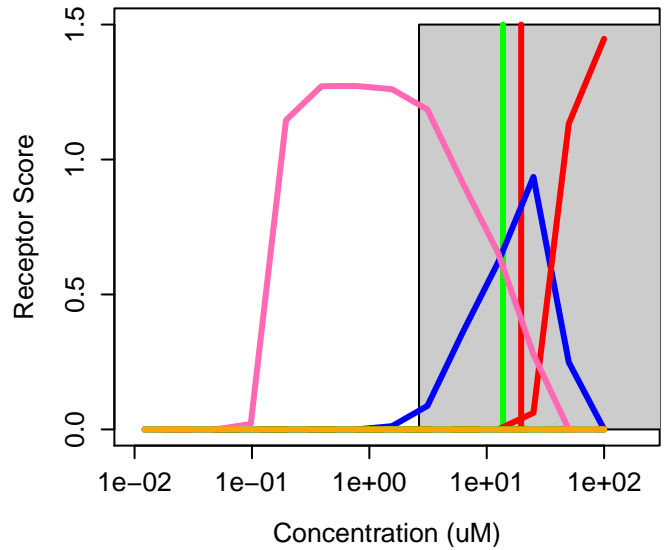

19780-11-1 : (2-Dodeceny)succinic anhydride

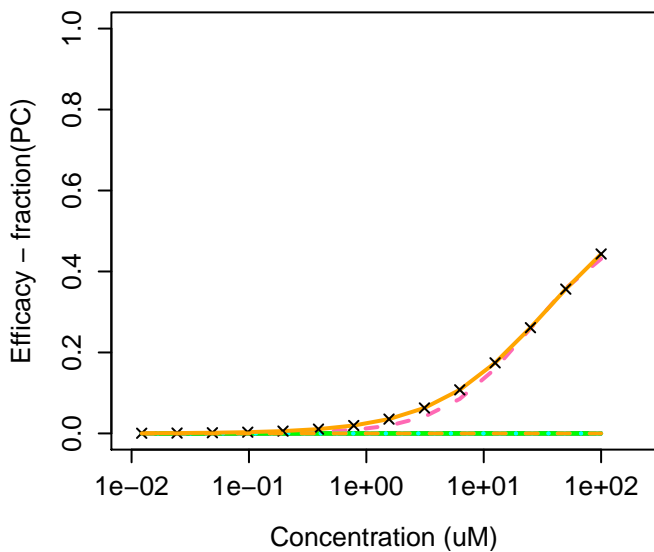

19780-11-1 : (2-Dodeceny)succinic anhydride  
Agonist: 0 Antagonist: 0

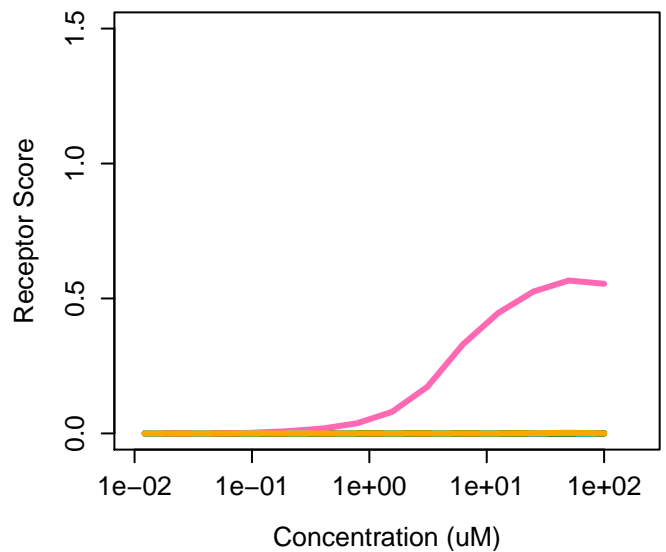



1987-50-4 : 4-Heptylphenol

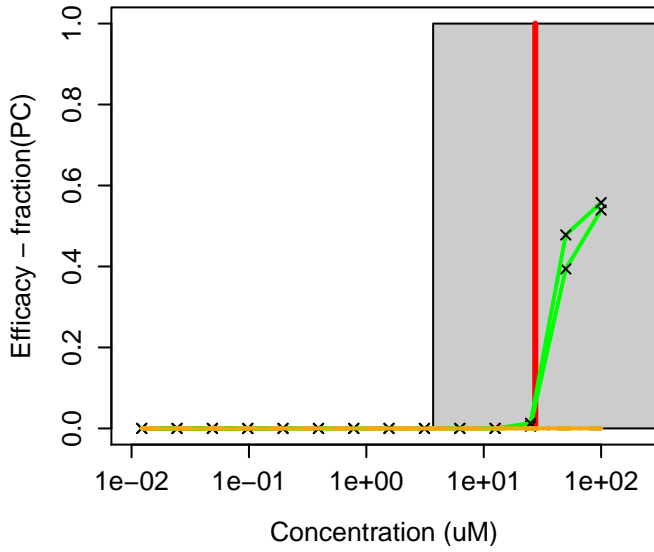

1987-50-4 : 4-Heptylphenol  
Agonist: 0 Antagonist: 0

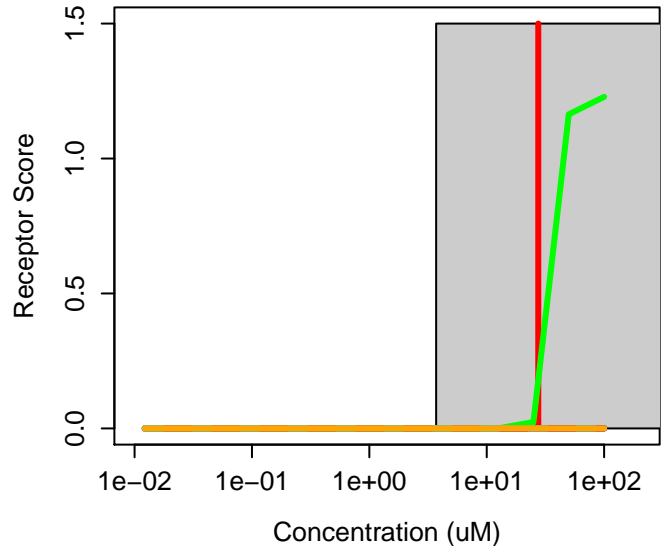

199119-58-9 : Trifloxysulfuron-sodium



199119-58-9 : Trifloxysulfuron-sodium  
Agonist: 0 Antagonist: 0



199171-88-5 : CP-401387

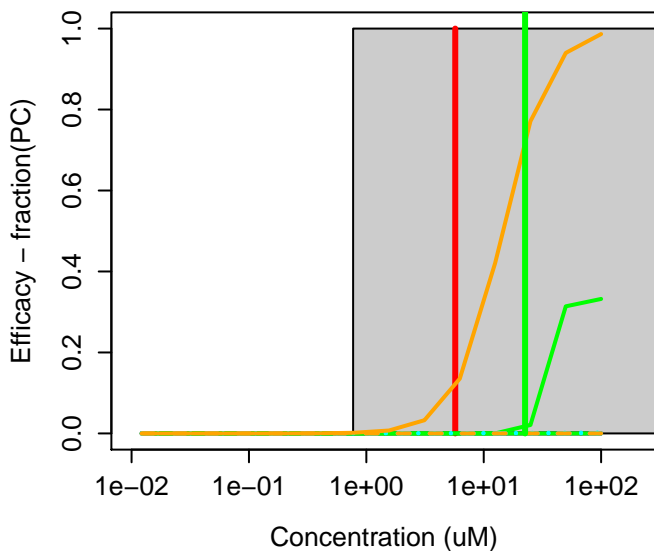

199171-88-5 : CP-401387  
Agonist: 0 Antagonist: 0.033

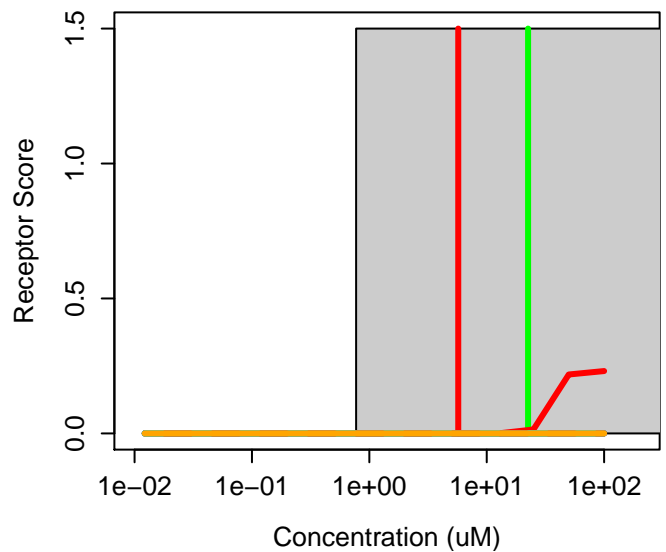

199584-38-8 : 1-Methoxy-4-tert-pentylcyclohexa

199584-38-8 : 1-Methoxy-4-tert-pentylcyclohexa

Agonist: 0 Antagonist: 0



2008-41-5 : Butylate

2008-41-5 : Butylate

Agonist: 0 Antagonist: 0



200940-23-4 : SB243213A

200940-23-4 : SB243213A

Agonist: 0 Antagonist: 0.00043

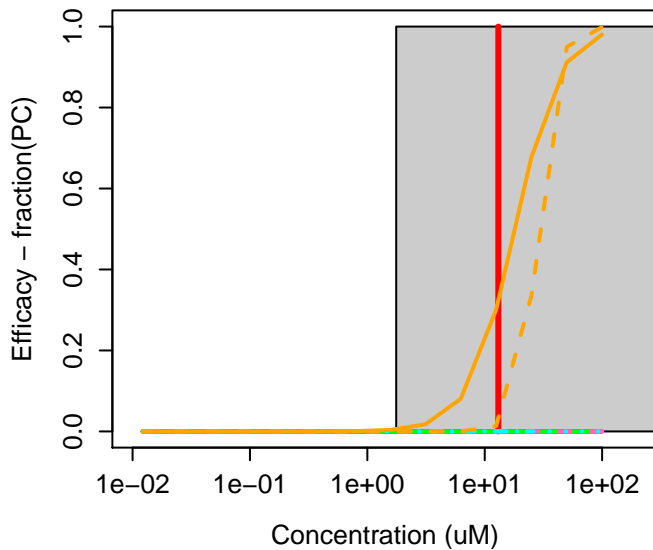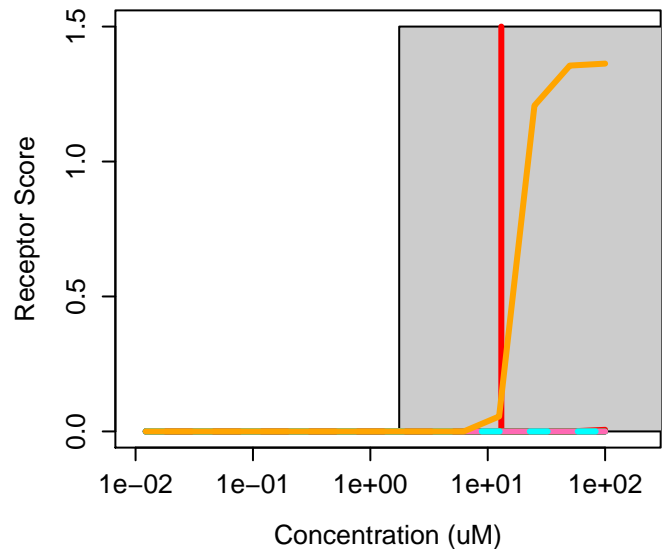

2016-57-1 : 1-Decanamine

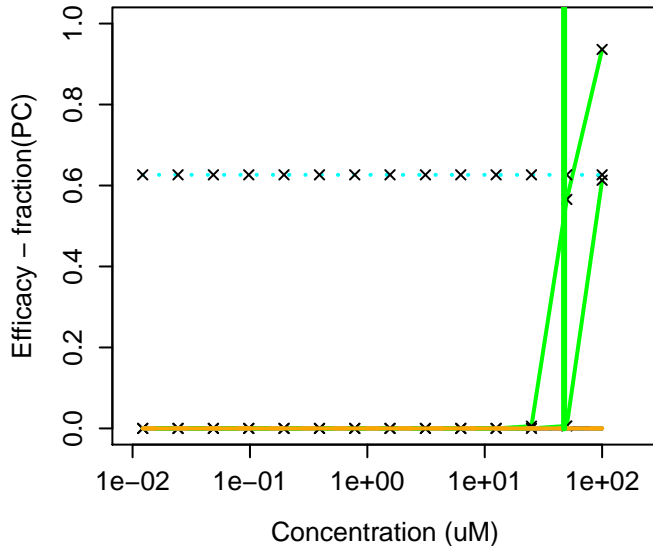

2016-57-1 : 1-Decanamine  
Agonist: 0.045 Antagonist: 0

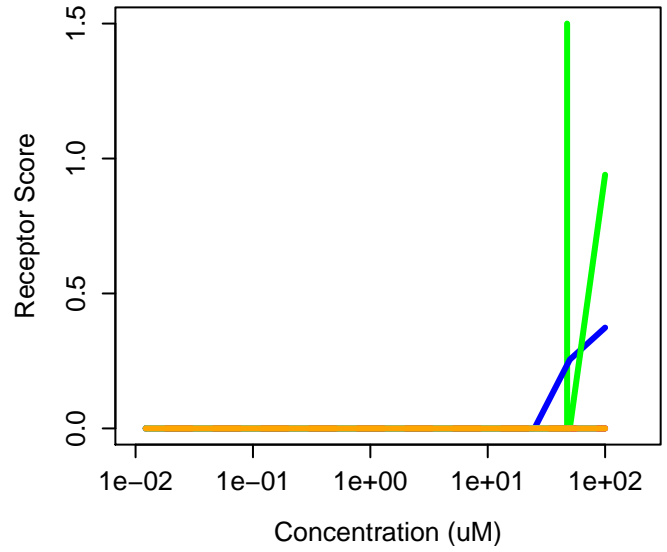

20265-97-8 : 4-Methoxyaniline hydrochloride



20265-97-8 : 4-Methoxyaniline hydrochloride  
Agonist: 0 Antagonist: 0



2031-67-6 : Triethoxymethylsilane



2031-67-6 : Triethoxymethylsilane  
Agonist: 0 Antagonist: 0



20325-40-0 : 3,3'-Dimethoxybenzidine dihydrochloride    20325-40-0 : 3,3'-Dimethoxybenzidine dihydrochloride  
 Agonist: 0 Antagonist: 0.29

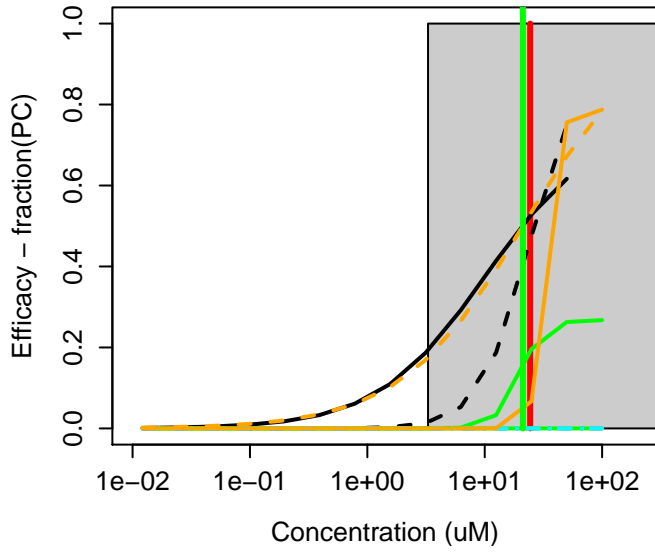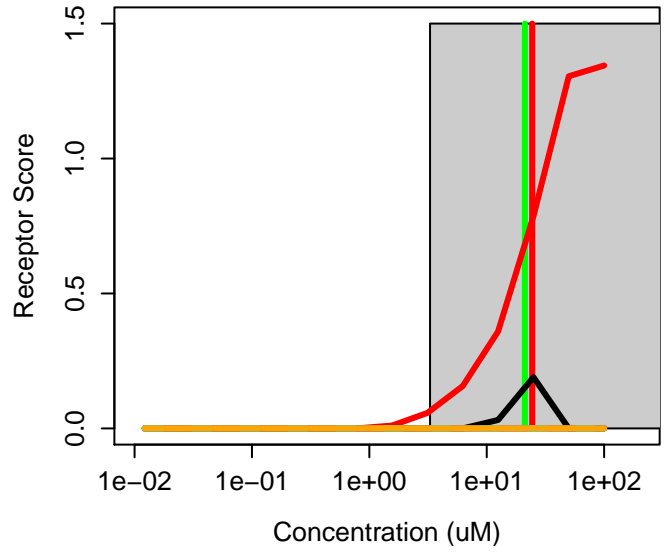

203942-49-8 : UK-337312

203942-49-8 : UK-337312  
 Agonist: 0.0021 Antagonist: 0.07

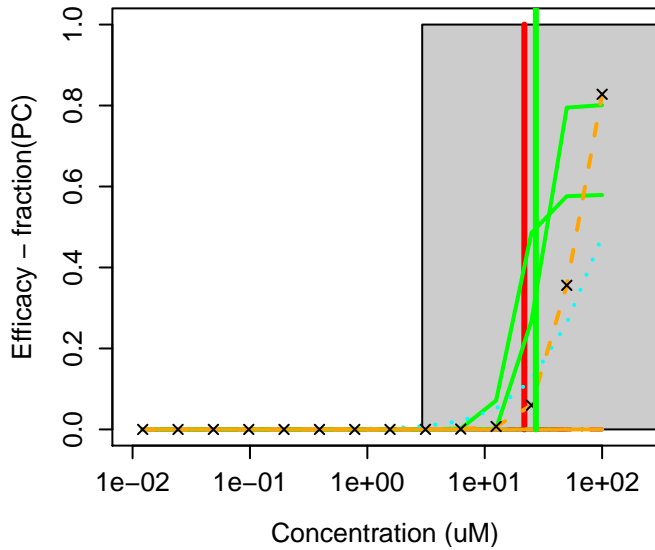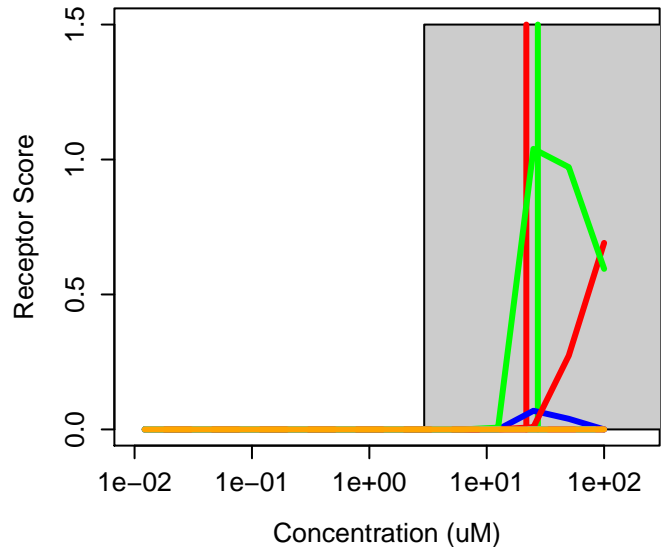

2043-57-4 : 1H,1H,2H,2H-Perfluorooctyl iodide

2043-57-4 : 1H,1H,2H,2H-Perfluorooctyl iodide  
 Agonist: 0 Antagonist: 0



2044-64-6 : N,N-Dimethylacetoacetamide

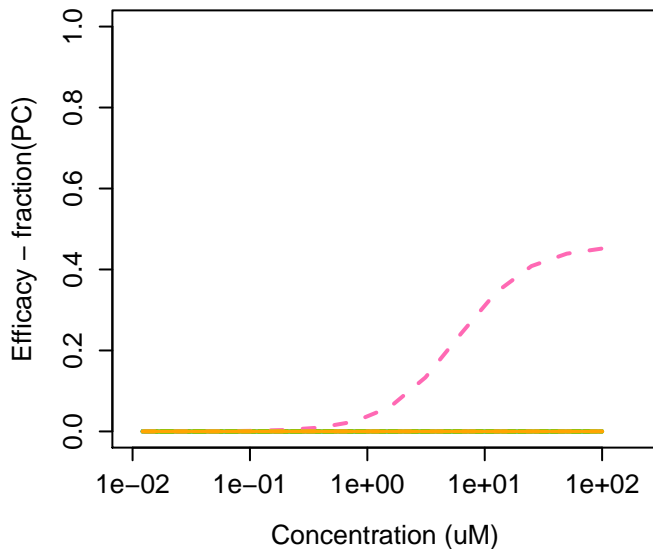

2044-64-6 : N,N-Dimethylacetoacetamide  
Agonist: 0 Antagonist: 0

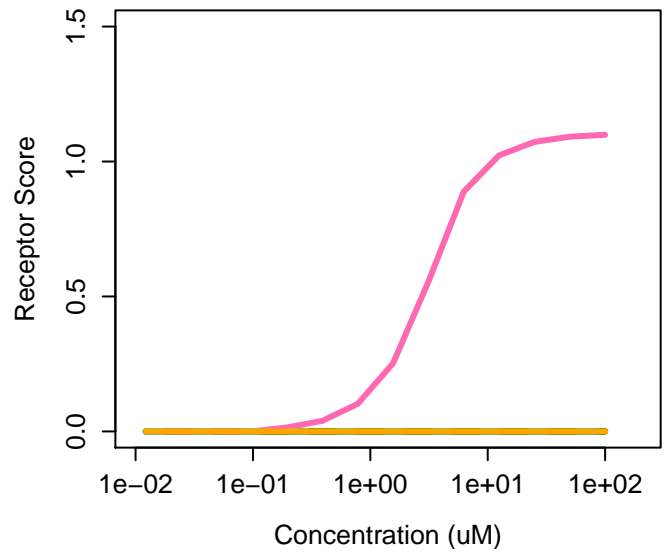

2058-46-0 : Oxytetracycline hydrochloride

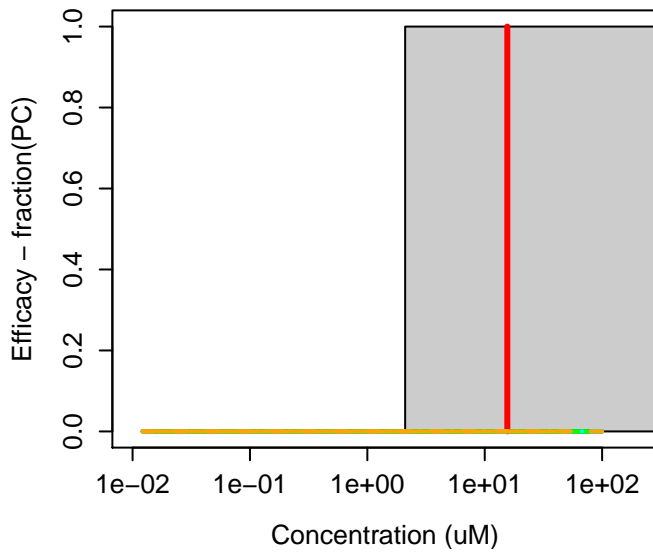

2058-46-0 : Oxytetracycline hydrochloride  
Agonist: 0 Antagonist: 0

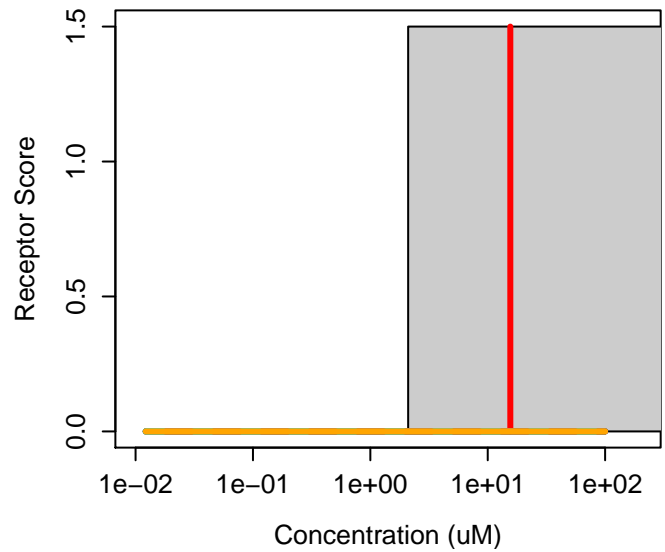

2058-94-8 : Perfluoroundecanoic acid

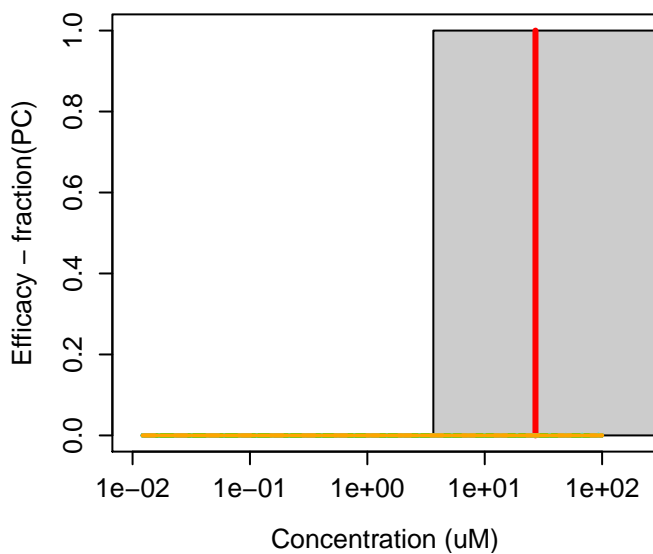

2058-94-8 : Perfluoroundecanoic acid  
Agonist: 0 Antagonist: 0

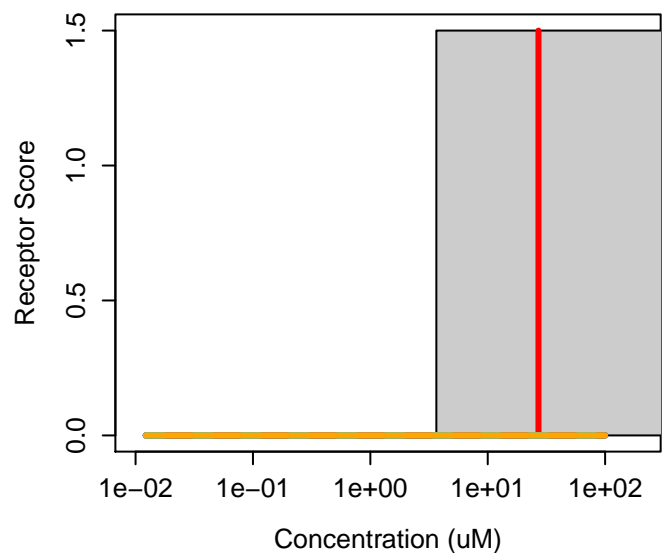

205-99-2 : Benzo(b)fluoranthene

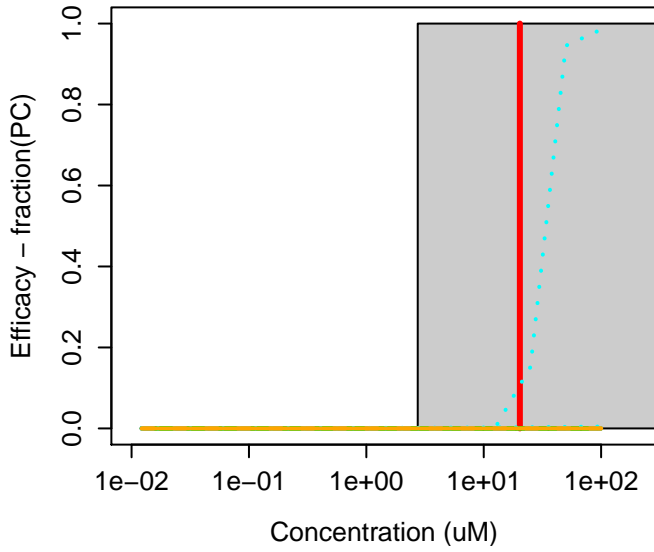

205-99-2 : Benzo(b)fluoranthene  
Agonist: 0 Antagonist: 0

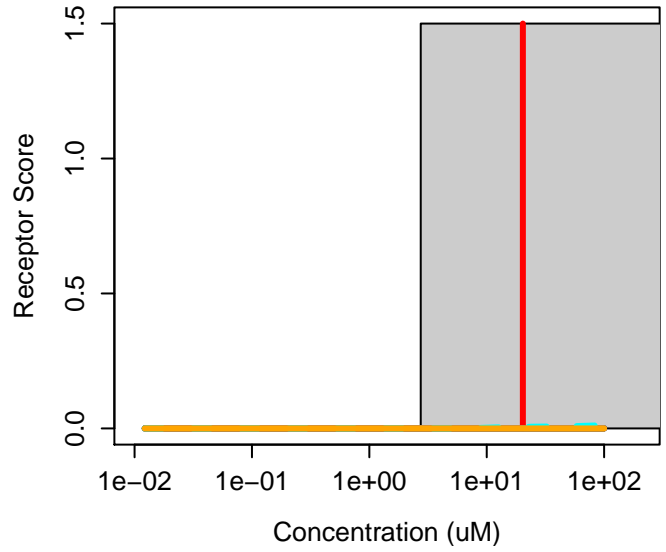

206-44-0 : Fluoranthene

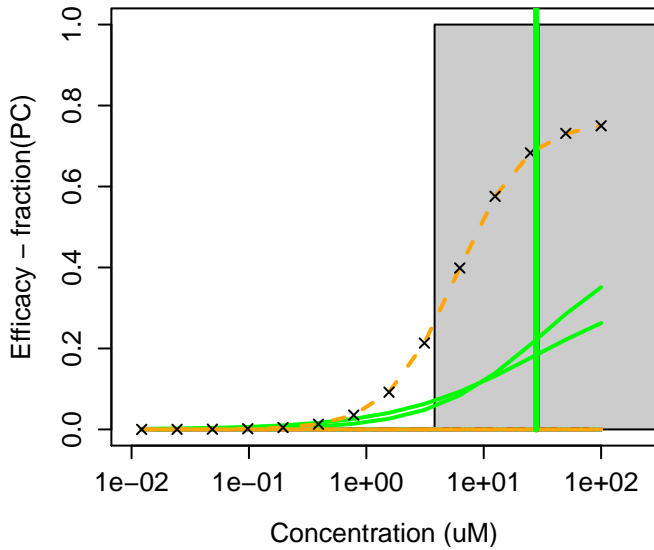

206-44-0 : Fluoranthene  
Agonist: 0 Antagonist: 0.099

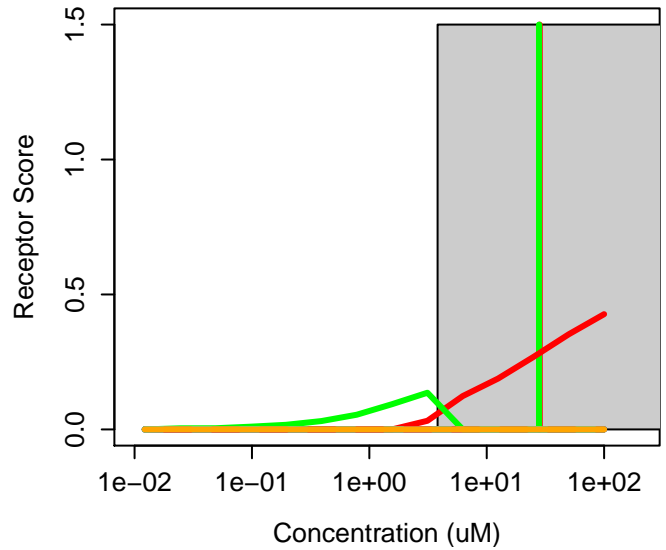

207736-05-8 : CI-1029

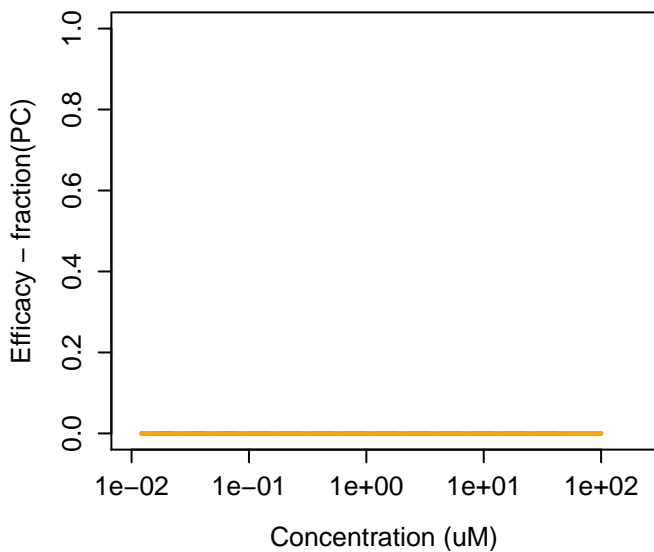

207736-05-8 : CI-1029  
Agonist: 0 Antagonist: 0



20780-48-7 : 3,7-Dimethyloctan-3-yl acetate



20780-48-7 : 3,7-Dimethyloctan-3-yl acetate  
Agonist: 0 Antagonist: 0



2078-54-8 : Propofol



2078-54-8 : Propofol  
Agonist: 0 Antagonist: 0



20830-75-5 : Digoxin

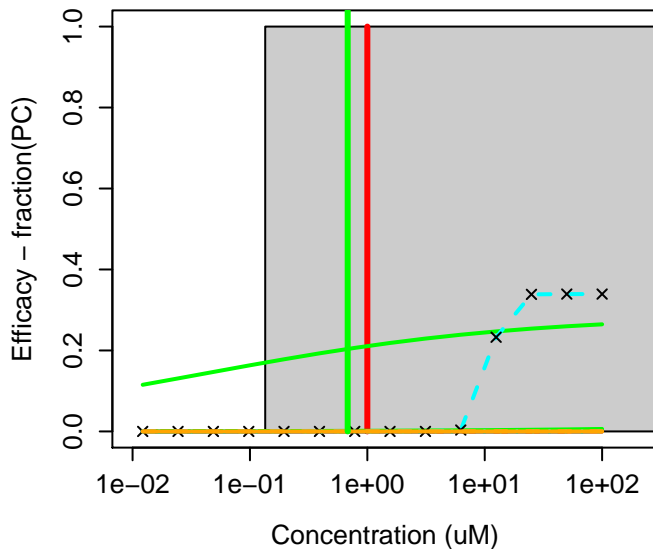

20830-75-5 : Digoxin  
Agonist: 0.026 Antagonist: 0

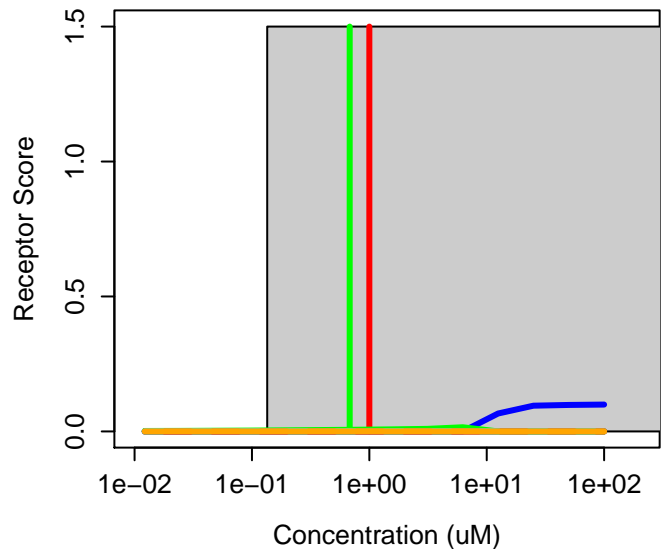

**208-96-8 : Acenaphthylene**



**208-96-8 : Acenaphthylene**  
**Agonist: 0 Antagonist: 0**



**2104-64-5 : EPN**

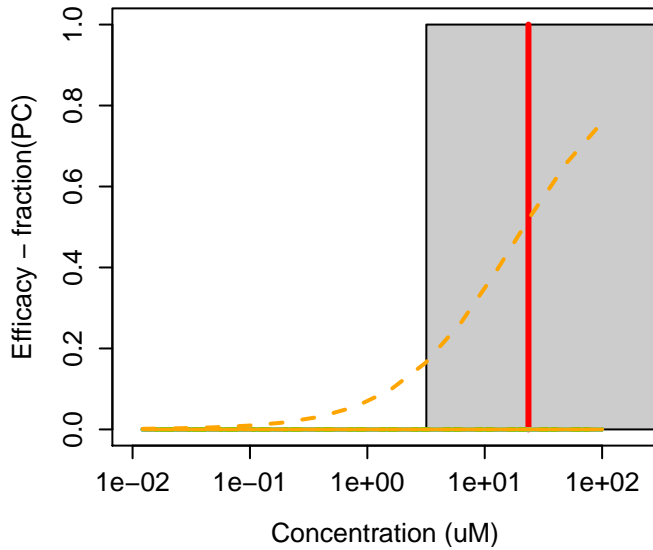

**2104-64-5 : EPN**  
**Agonist: 0 Antagonist: 0**

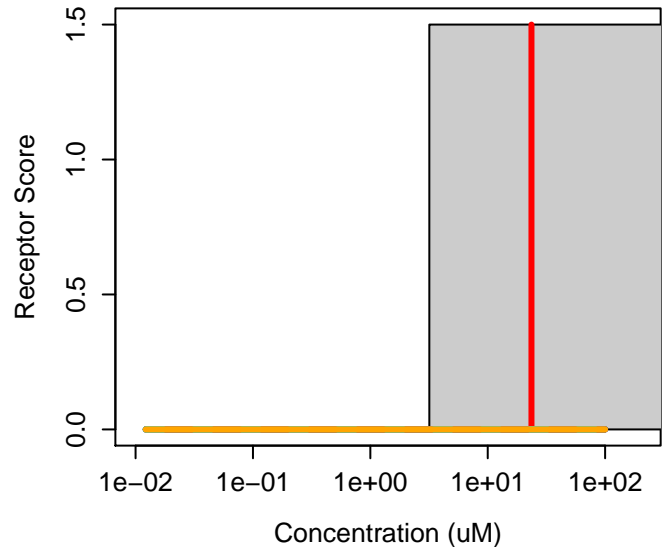

**210631-68-8 : Topramezone**

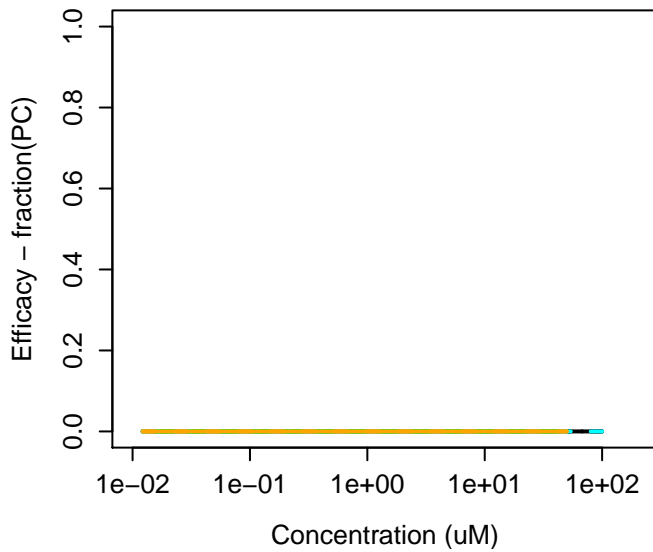

**210631-68-8 : Topramezone**  
**Agonist: 0 Antagonist: 0**





**210826-40-7 : CP-456773**

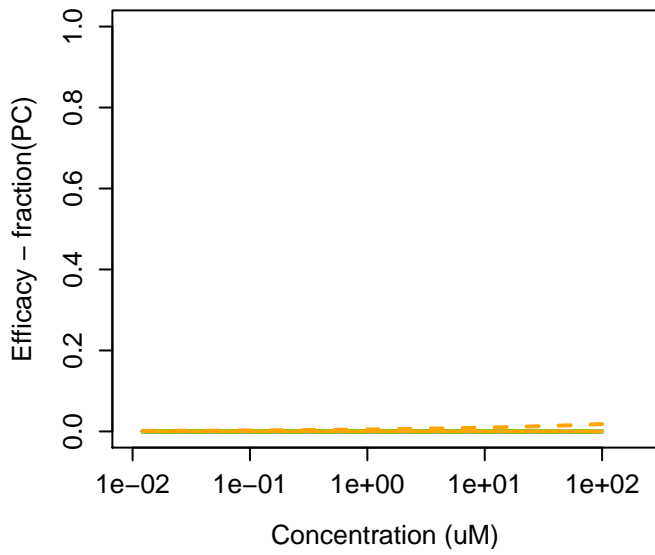

**210826-40-7 : CP-456773**  
**Agonist: 0 Antagonist: 0**

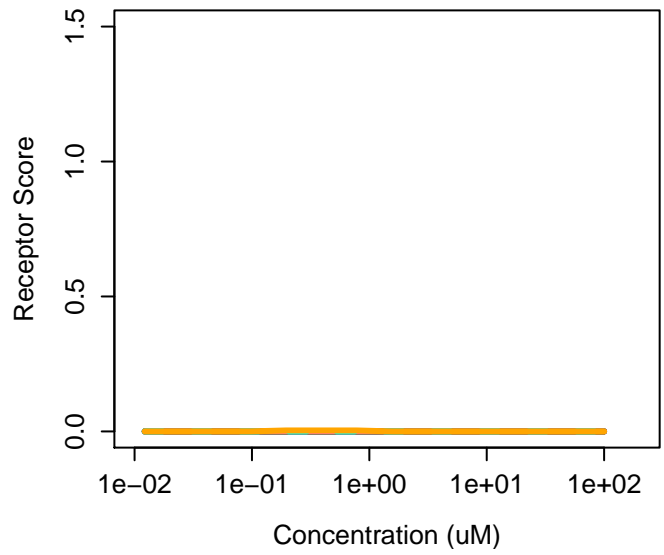

**21087-64-9 : Metribuzin**

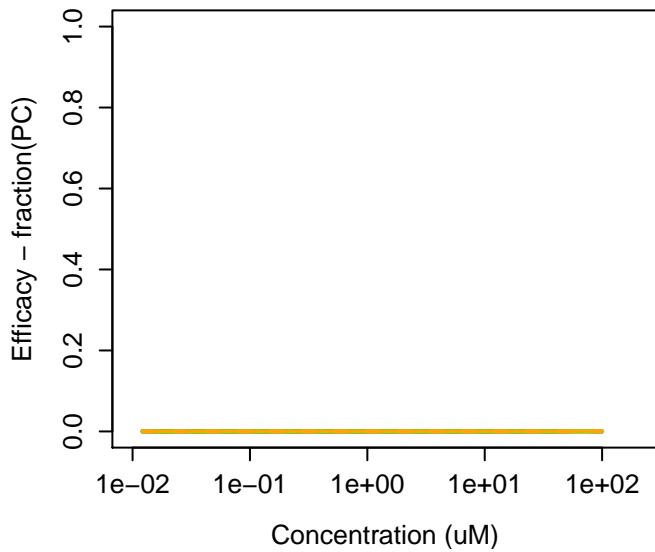

**21087-64-9 : Metribuzin**  
**Agonist: 0 Antagonist: 0**



**210880-92-5 : Clothianidin**

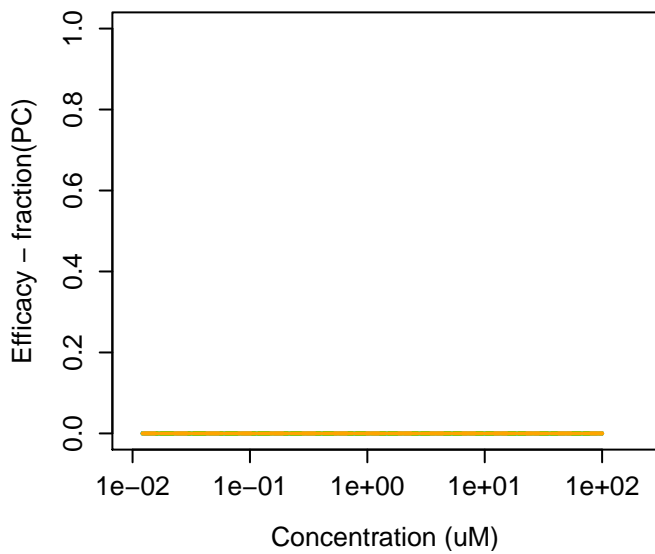

**210880-92-5 : Clothianidin**  
**Agonist: 0 Antagonist: 0**

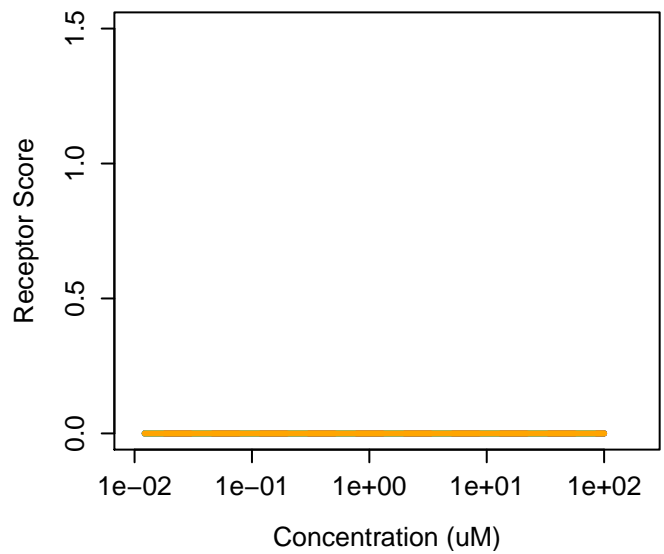

2110-18-1 : 2-(3-Phenylpropyl)pyridine

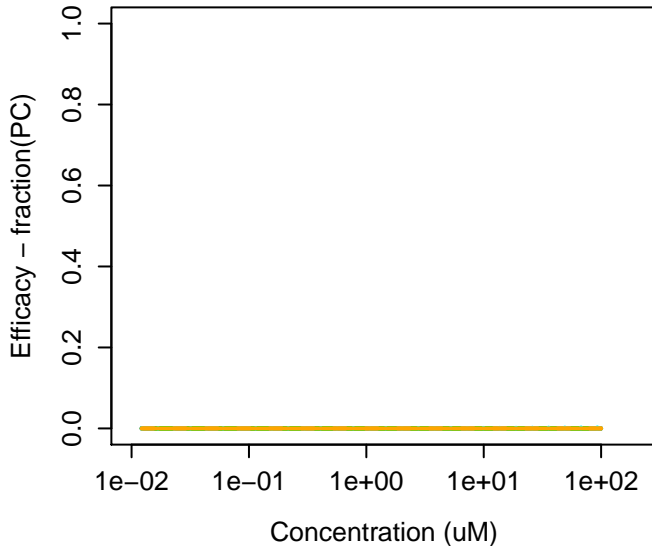

2110-18-1 : 2-(3-Phenylpropyl)pyridine  
Agonist: 0 Antagonist: 0

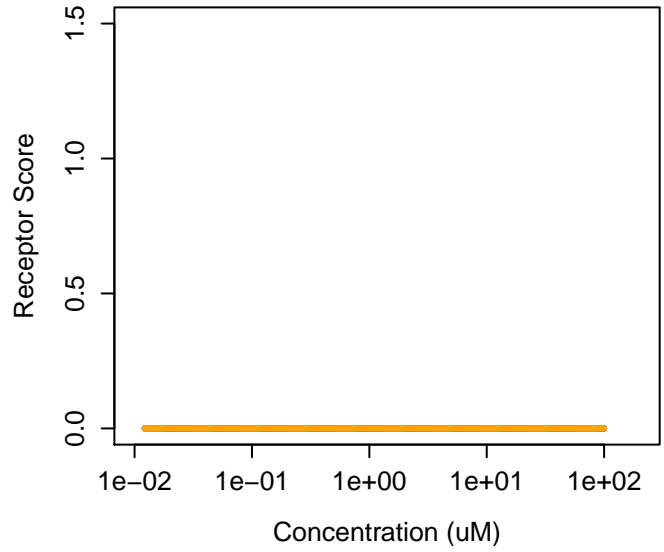

21145-77-7 : 6-Acetyl-1,1,2,4,4,7-hexamethyltetra

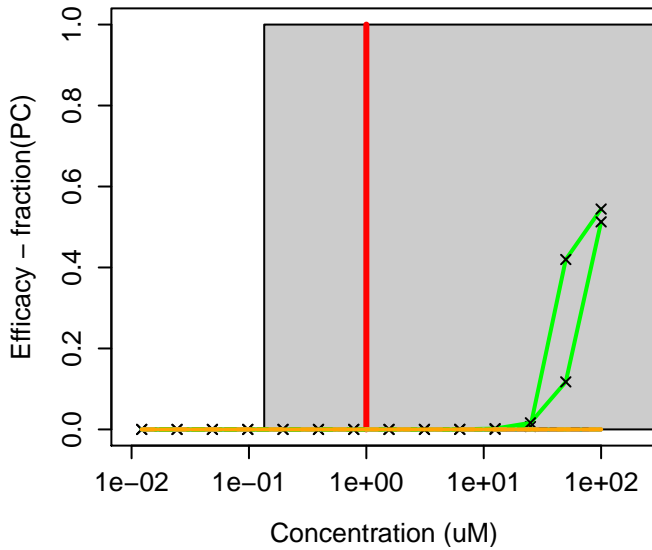

21145-77-7 : 6-Acetyl-1,1,2,4,4,7-hexamethyltetra  
Agonist: 0 Antagonist: 0

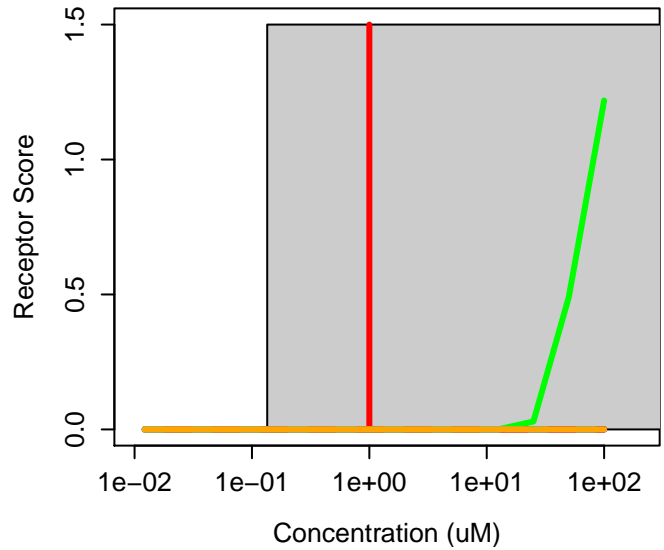

2122-70-5 : Ethyl 1-naphthaleneacetate



2122-70-5 : Ethyl 1-naphthaleneacetate  
Agonist: 0 Antagonist: 0



21245-02-3 : 2-Ethylhexyl 4-(dimethylamino)benzoate Agonist: 0 Antagonist: 0

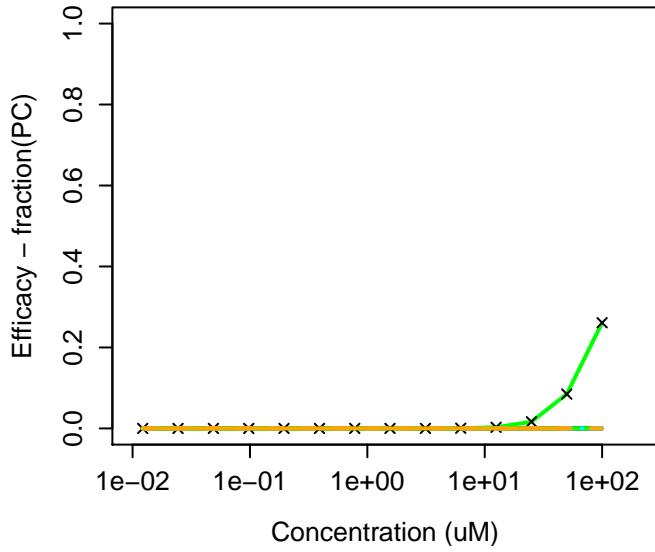

2144-53-8 : Tridecafluorohexylethyl methacrylate

2144-53-8 : Tridecafluorohexylethyl methacrylate Agonist: 0 Antagonist: 0

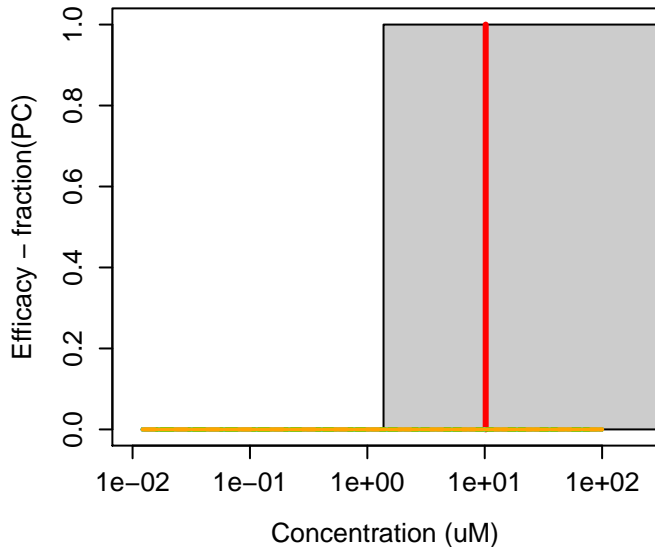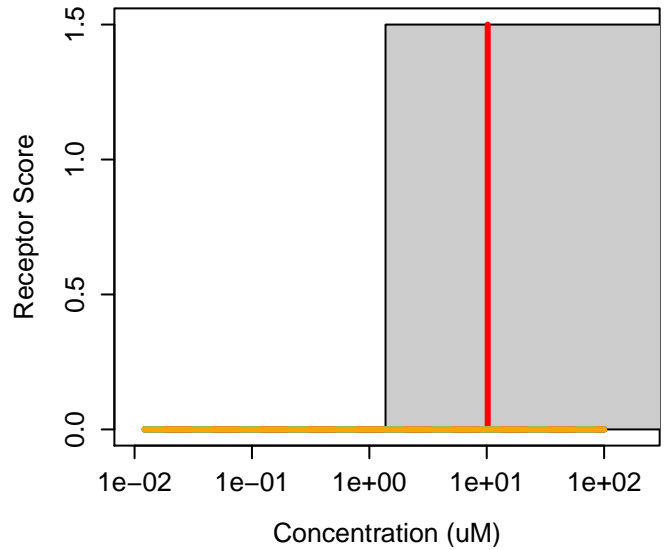

214535-77-0 : CP-457677

214535-77-0 : CP-457677 Agonist: 0 Antagonist: 0



215297-27-1 : UK-343664



215297-27-1 : UK-343664  
Agonist: 0 Antagonist: 0



2155-70-6 : Tributyltin methacrylate

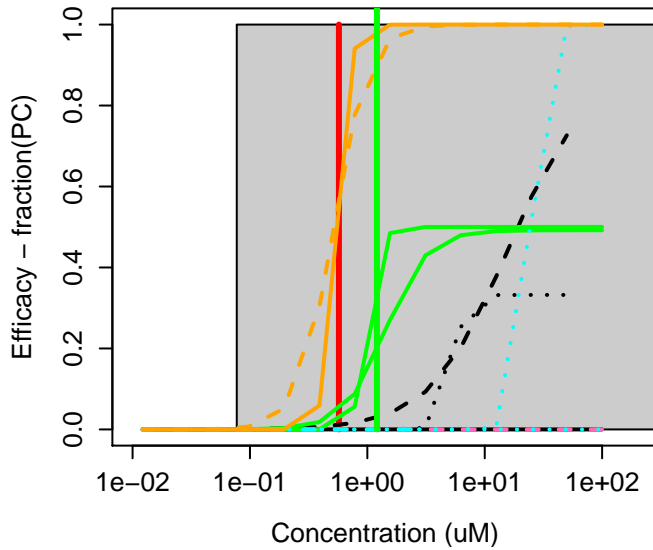

2155-70-6 : Tributyltin methacrylate  
Agonist: 0 Antagonist: 0.6

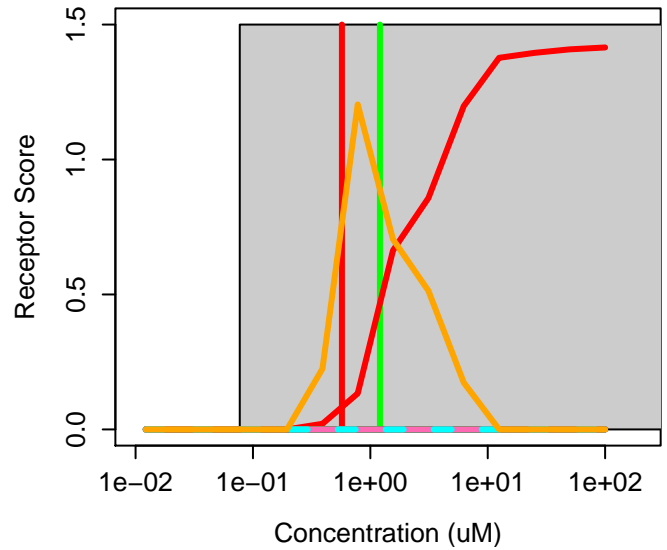

21564-17-0 : 2-(Thiocyanomethylthio)benzothiaz

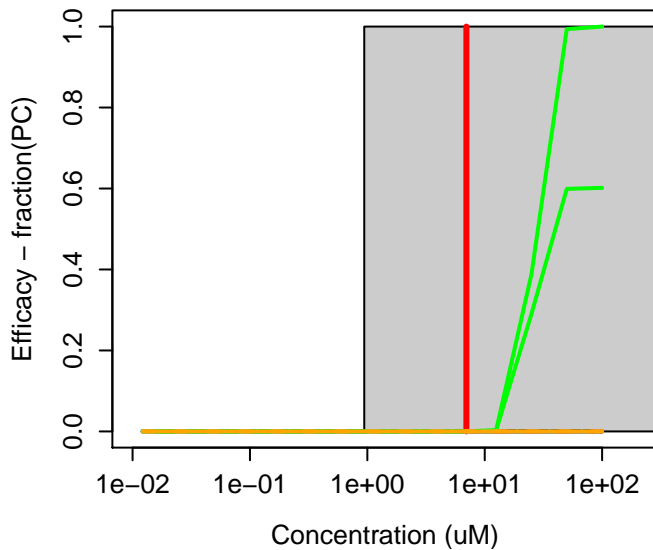

21564-17-0 : 2-(Thiocyanomethylthio)benzothiaz  
Agonist: 0 Antagonist: 0

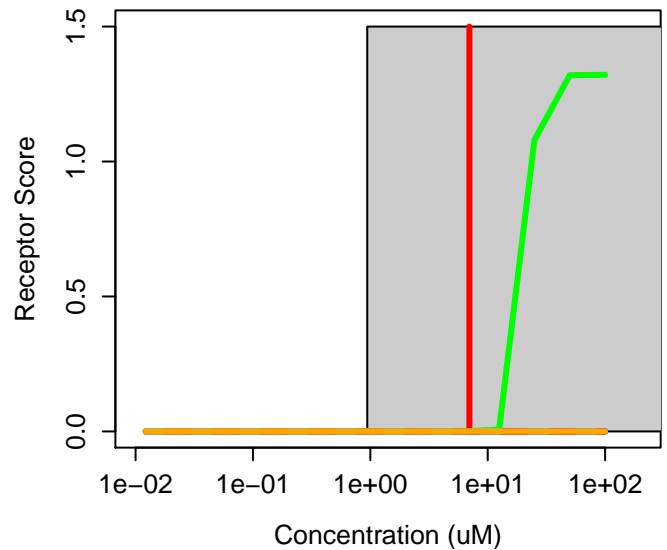

2164-17-2 : Fluometuron



2164-17-2 : Fluometuron  
Agonist: 0 Antagonist: 0



21662-09-9 : (4Z)-4-Decenal

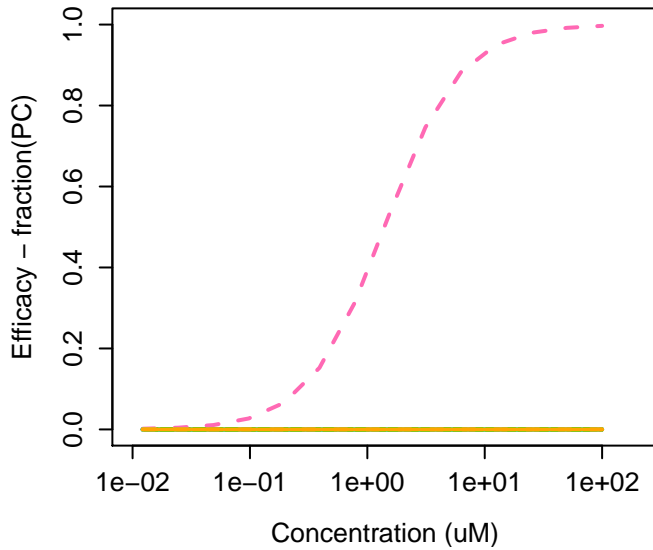

21662-09-9 : (4Z)-4-Decenal  
Agonist: 0 Antagonist: 0

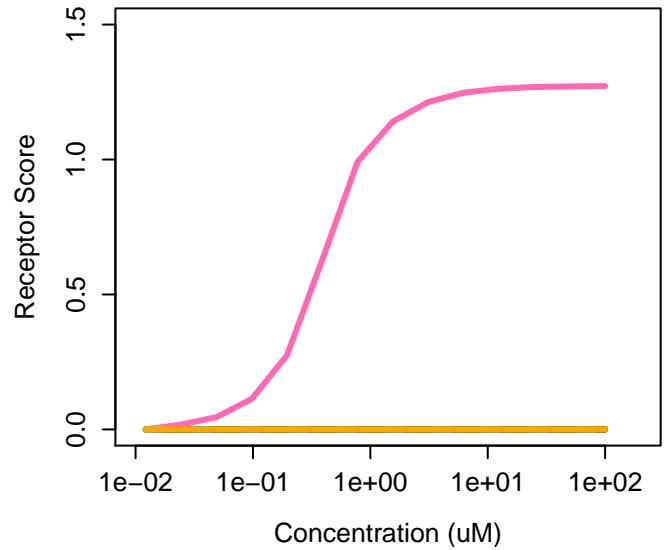

21725-46-2 : Cyanazine



21725-46-2 : Cyanazine  
Agonist: 0 Antagonist: 0



2176-62-7 : Pentachloropyridine

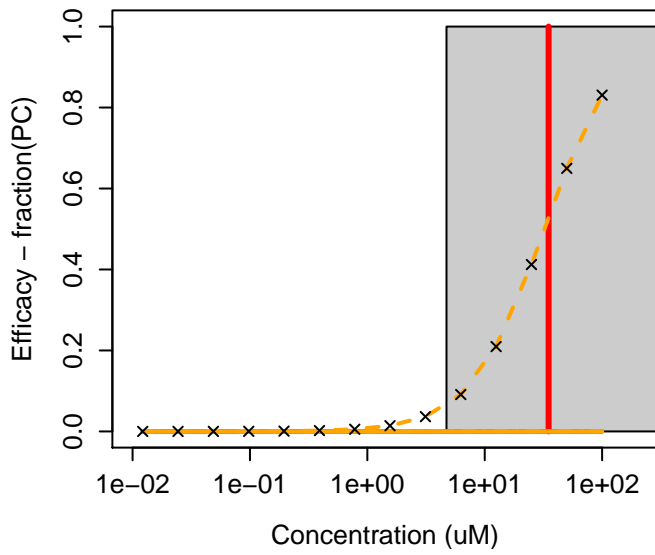

2176-62-7 : Pentachloropyridine  
Agonist: 0 Antagonist: 0

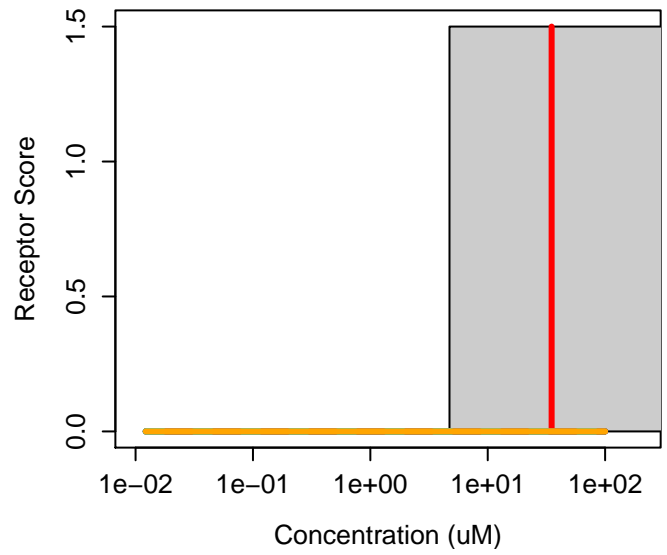

219714-96-2 : Penoxsulam



219714-96-2 : Penoxsulam  
Agonist: 0 Antagonist: 0



219790-72-4 : SB281832

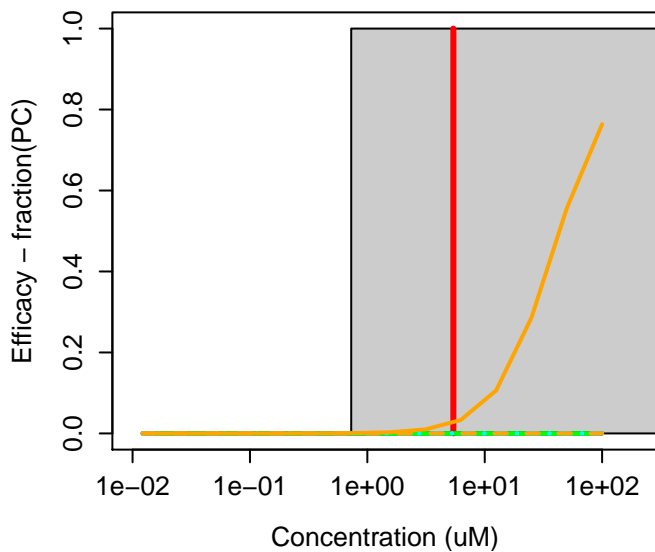

219790-72-4 : SB281832  
Agonist: 0 Antagonist: 0

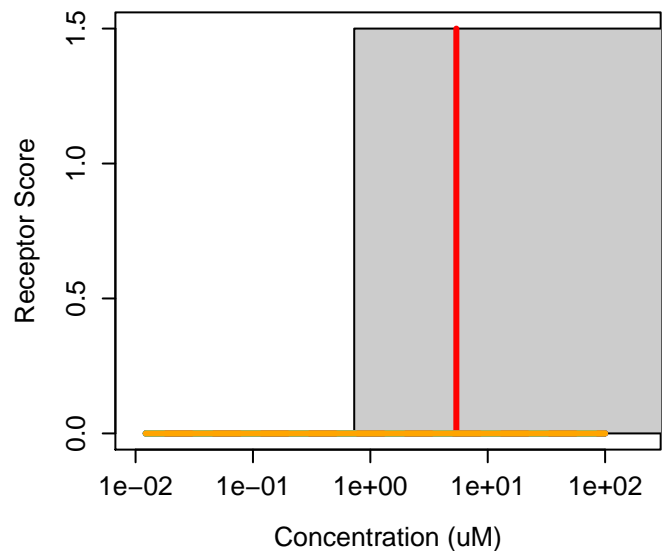

22047-49-0 : 2-Ethylhexyl octadecanoate



22047-49-0 : 2-Ethylhexyl octadecanoate  
Agonist: 0 Antagonist: 0



220860-50-4 : CP-457920

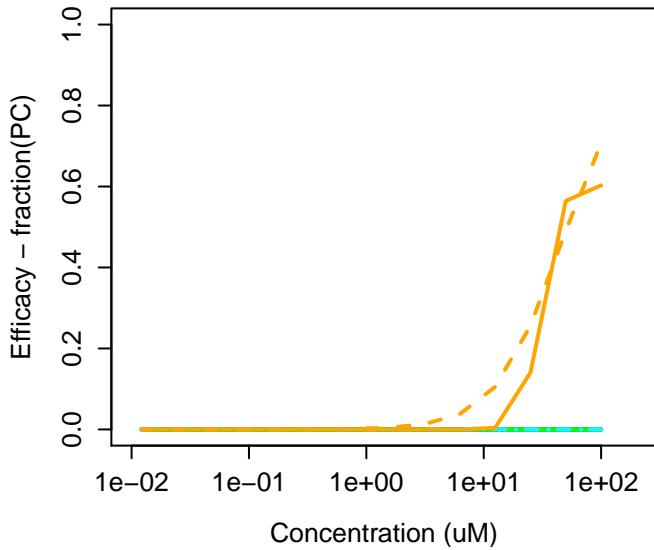

220860-50-4 : CP-457920  
Agonist: 0 Antagonist: 0

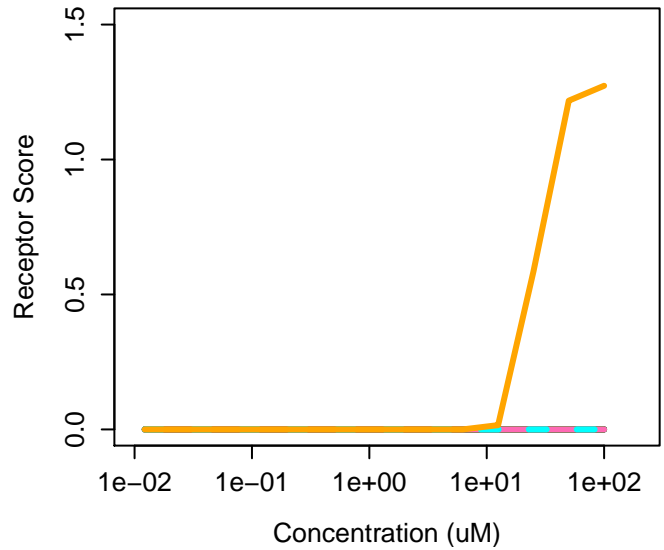

221246-12-4 : Fandosentan potassium salt

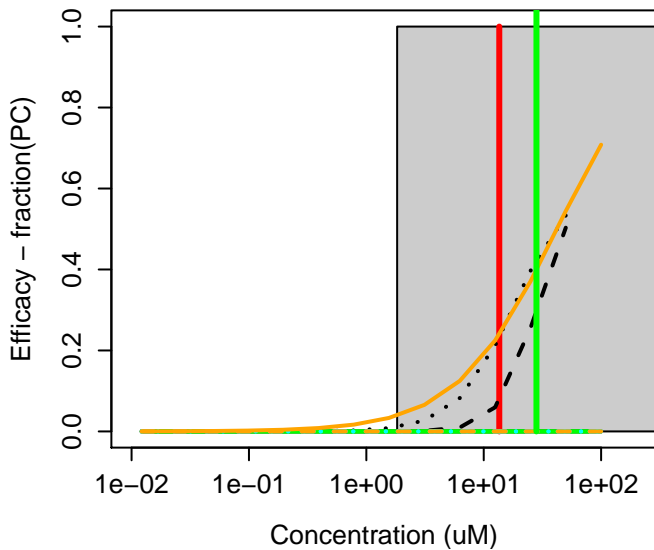

221246-12-4 : Fandosentan potassium salt  
Agonist: 0 Antagonist: 0.11

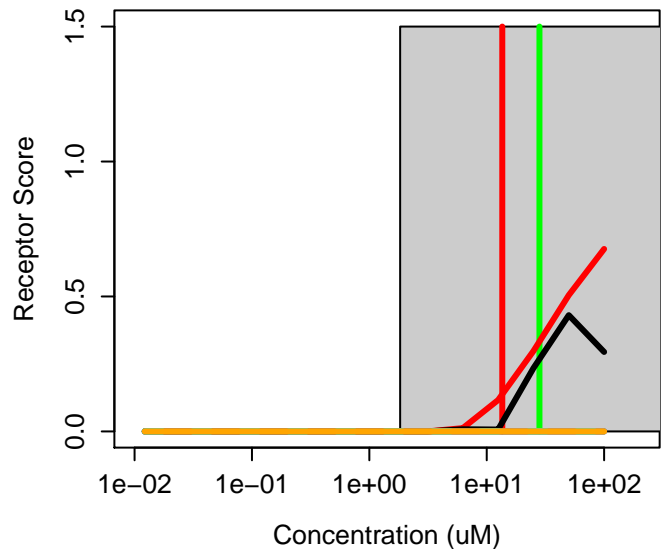

2212-67-1 : Molinate



2212-67-1 : Molinate  
Agonist: 0 Antagonist: 0



221671-62-1 : SR146131

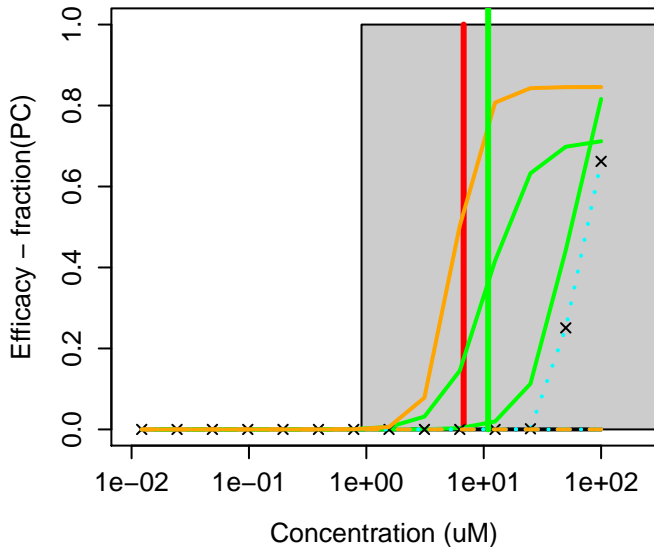

221671-62-1 : SR146131  
Agonist: 0.0089 Antagonist: 0.068

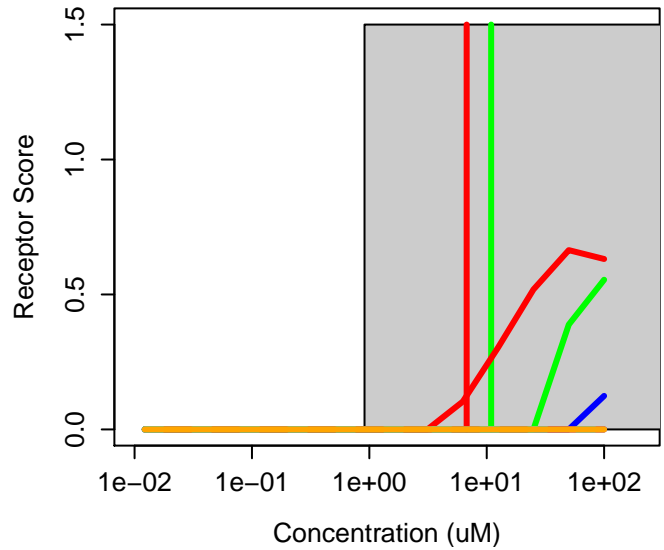

22224-92-6 : Fenamiphos

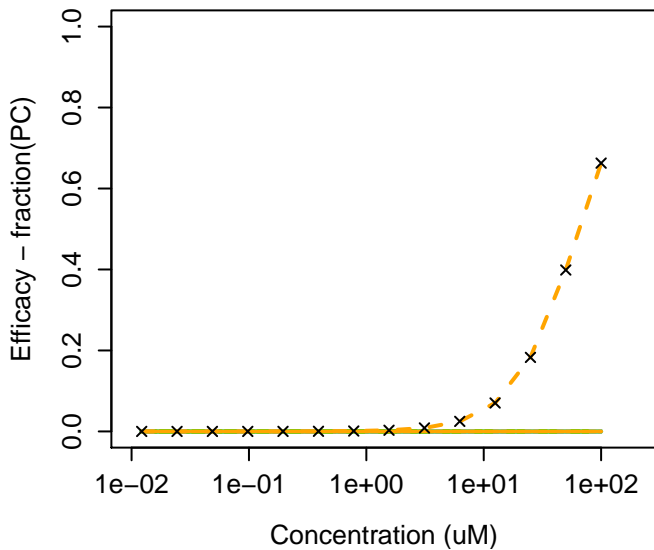

22224-92-6 : Fenamiphos  
Agonist: 0 Antagonist: 0

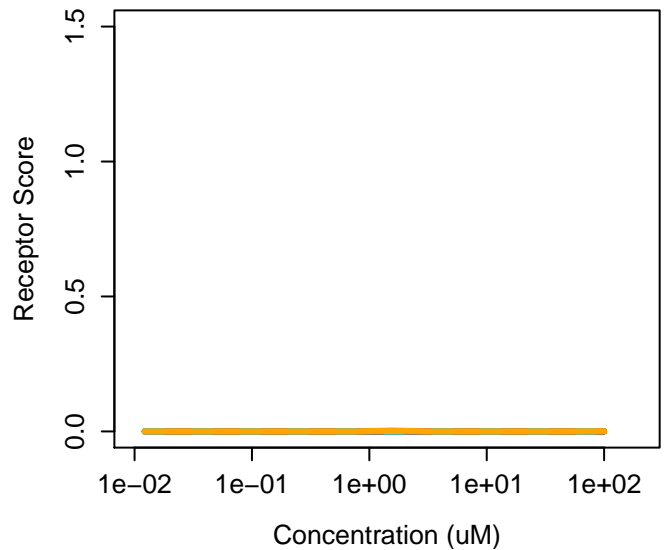



**22248-79-9 : Z-Tetrachlorvinphos**

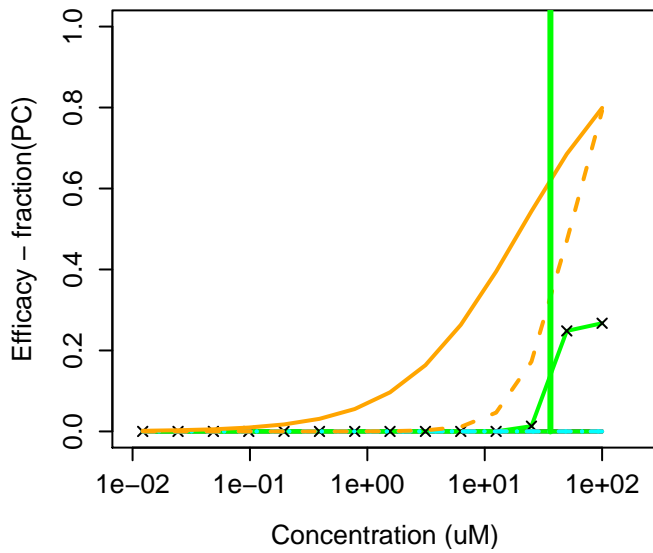

**22248-79-9 : Z-Tetrachlorvinphos**  
Agonist: 0 Antagonist: 0.031

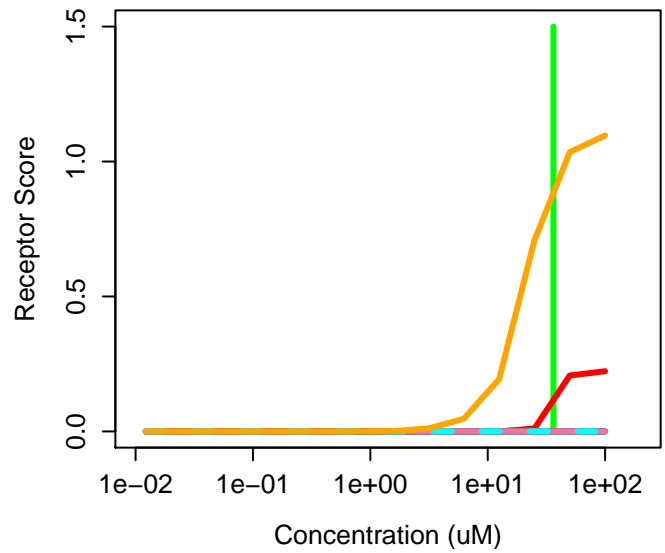

**22260-51-1 : Bromocriptine mesylate**

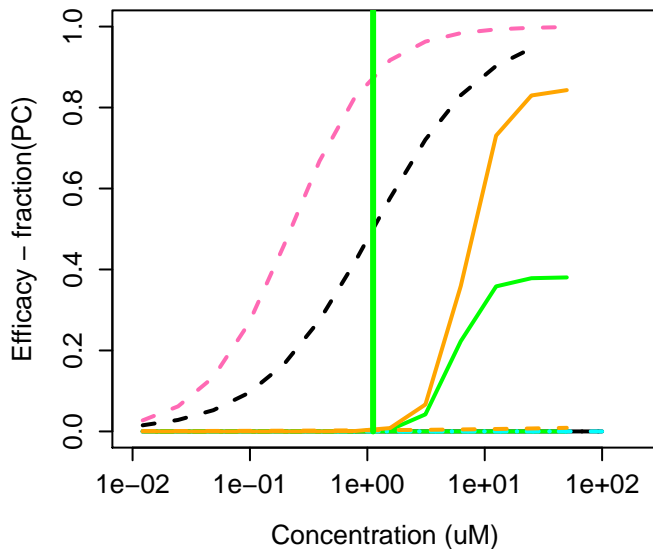

**22260-51-1 : Bromocriptine mesylate**  
Agonist: 0.12 Antagonist: 0.16

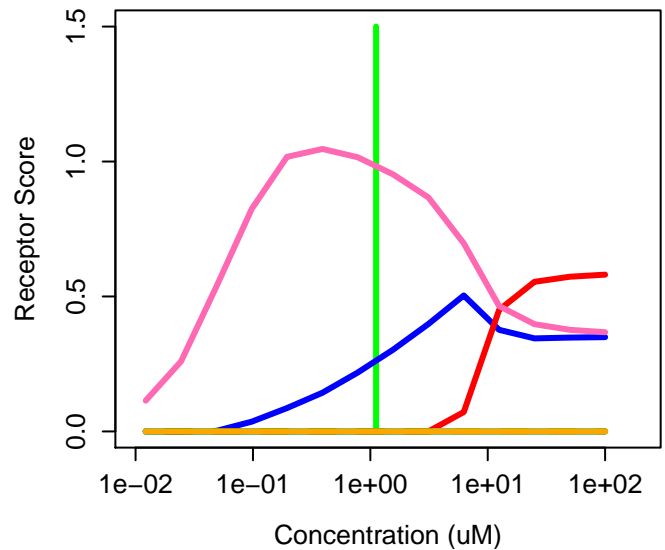

**2231-57-4 : Thiocarbazine**

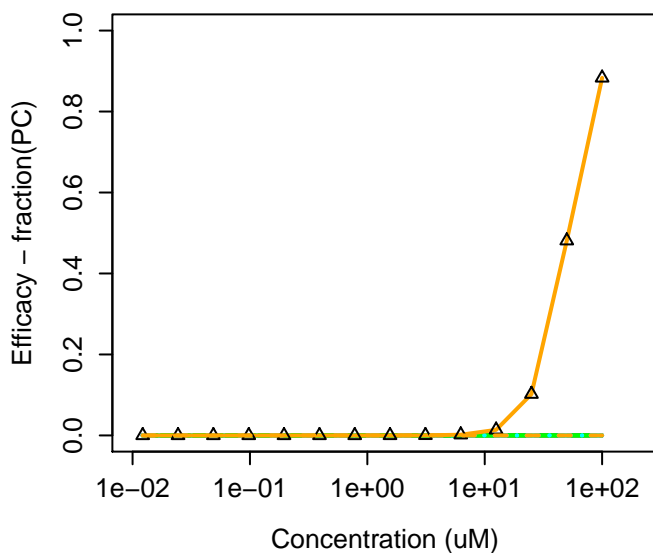

**2231-57-4 : Thiocarbazine**  
Agonist: 0 Antagonist: 0



**2243-62-1 : 1,5-Naphthalenediamine**

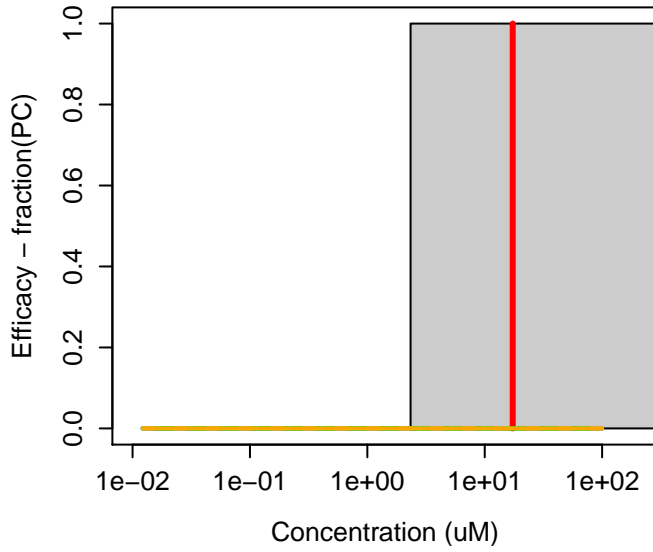

**2243-62-1 : 1,5-Naphthalenediamine  
Agonist: 0 Antagonist: 0**

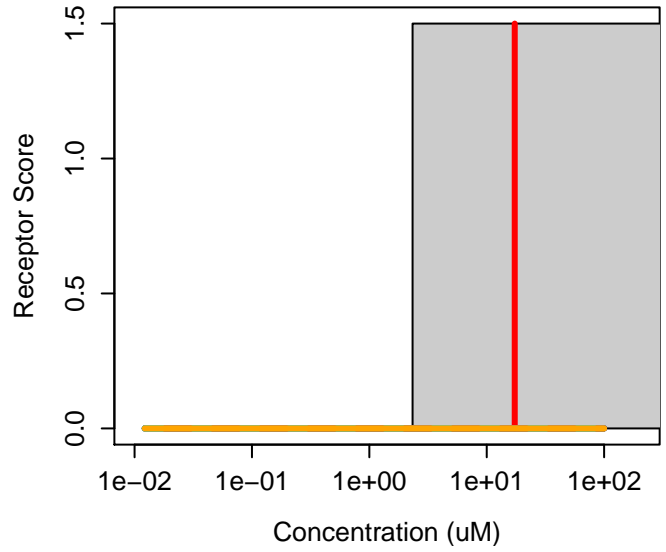

**2244-21-5 : Potassium dichloroisocyanurate**



**2244-21-5 : Potassium dichloroisocyanurate  
Agonist: 0 Antagonist: 0**



**22781-23-3 : Bendiocarb**

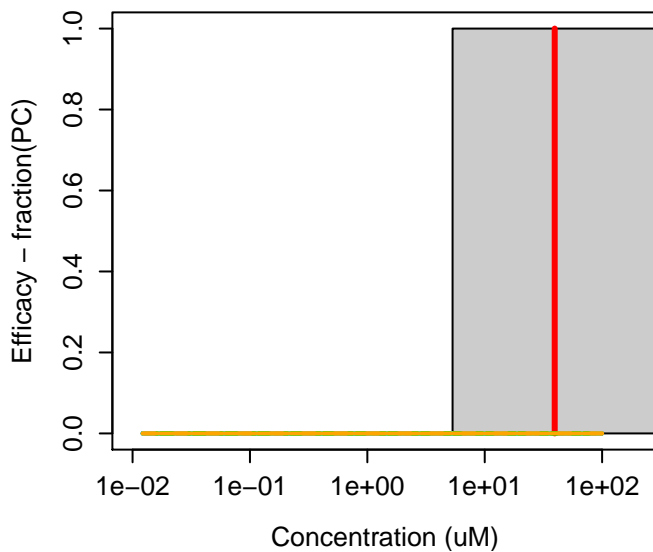

**22781-23-3 : Bendiocarb  
Agonist: 0 Antagonist: 0**

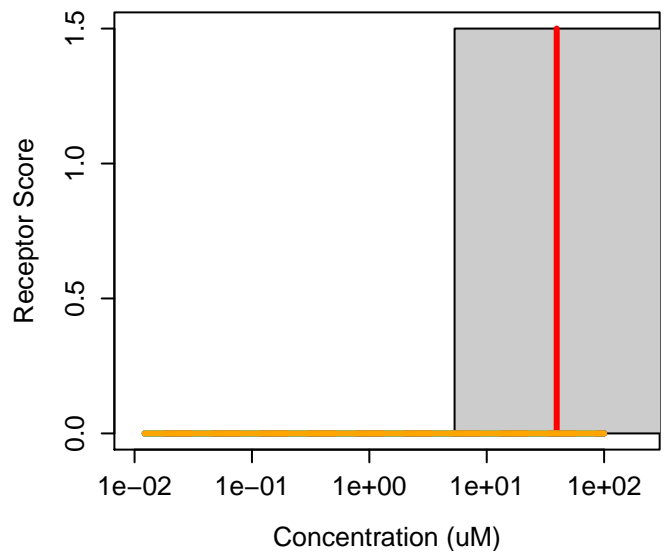

22839-47-0 : Aspartame



22839-47-0 : Aspartame  
Agonist: 0 Antagonist: 0



22915-73-7 : Hexane-1,6-diyl dibenzoate

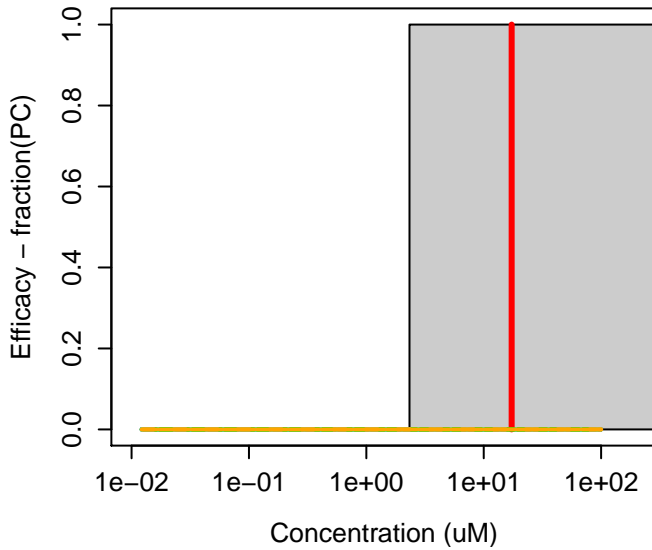

22915-73-7 : Hexane-1,6-diyl dibenzoate  
Agonist: 0 Antagonist: 0

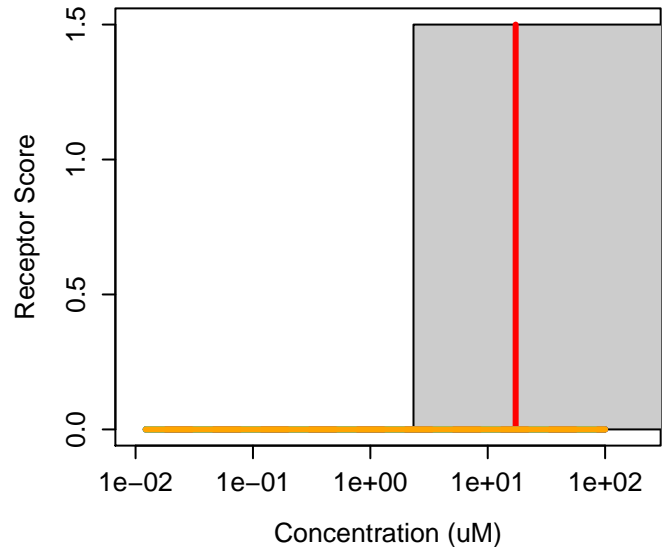

23031-36-9 : Prallethrin

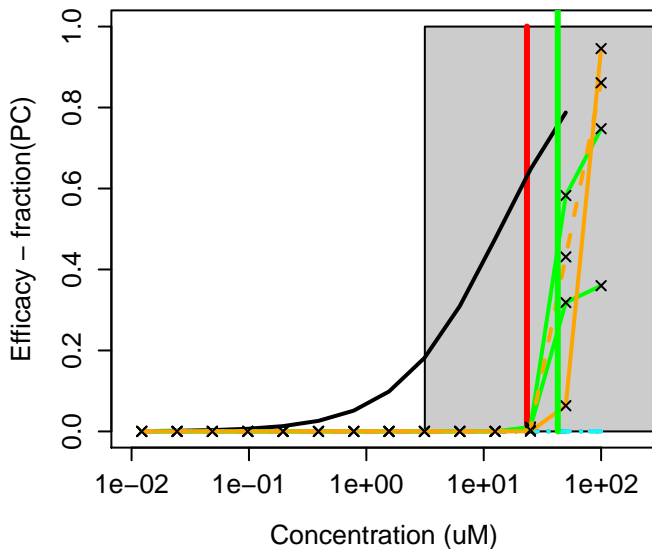

23031-36-9 : Prallethrin  
Agonist: 0 Antagonist: 0.17

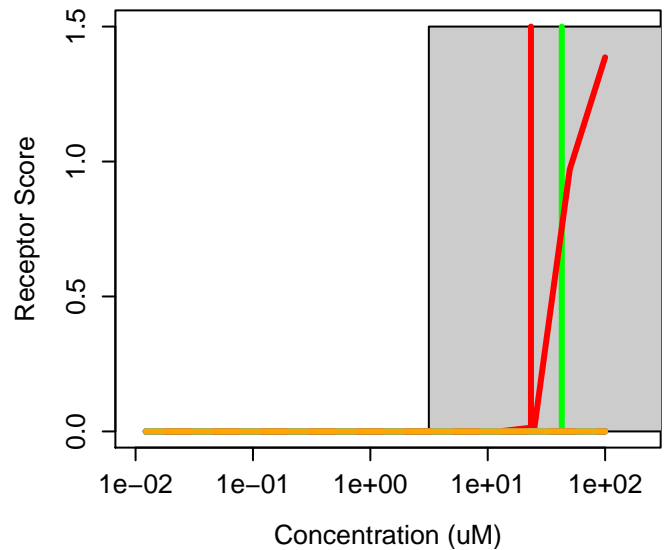

2303-17-5 : Tri-allate

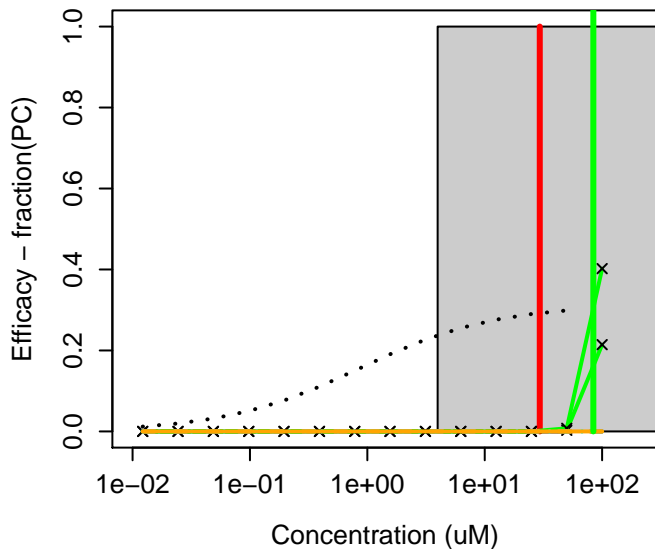

2303-17-5 : Tri-allate  
Agonist: 0.006 Antagonist: 0.012

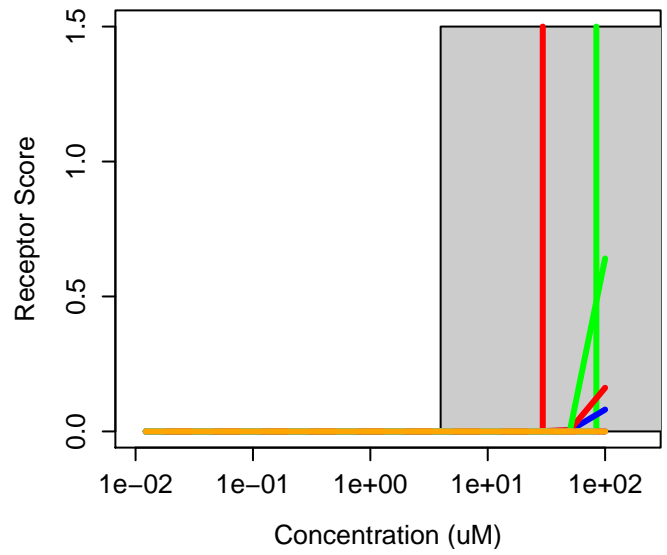

23089-26-1 : Levomenol



23089-26-1 : Levomenol  
Agonist: 0 Antagonist: 0



230954-09-3 : CP-544439

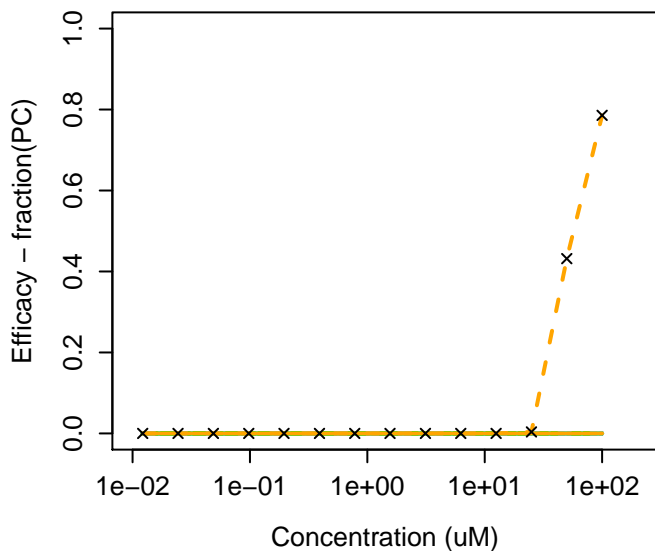

230954-09-3 : CP-544439  
Agonist: 0 Antagonist: 0



2310-17-0 : Phosalone

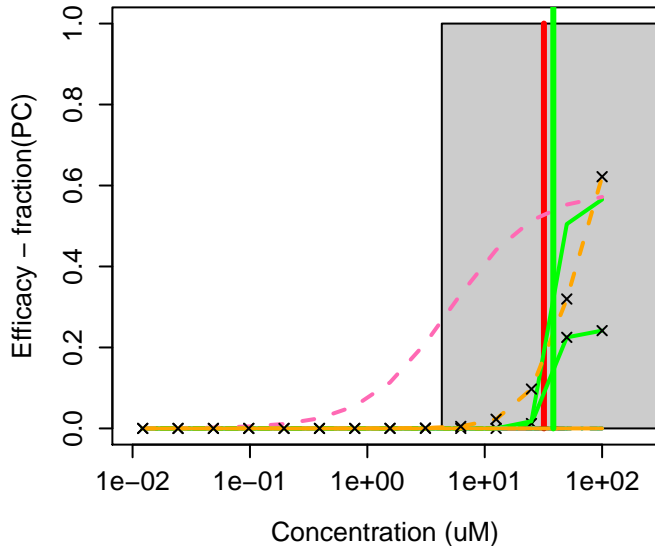

2310-17-0 : Phosalone  
Agonist: 0.0058 Antagonist: 0.039

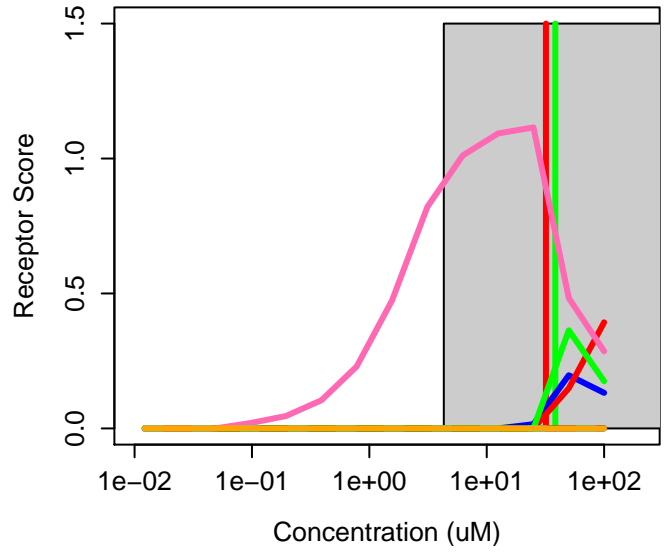

23103-98-2 : Pirimicarb



23103-98-2 : Pirimicarb  
Agonist: 0 Antagonist: 0



2312-35-8 : Propargite

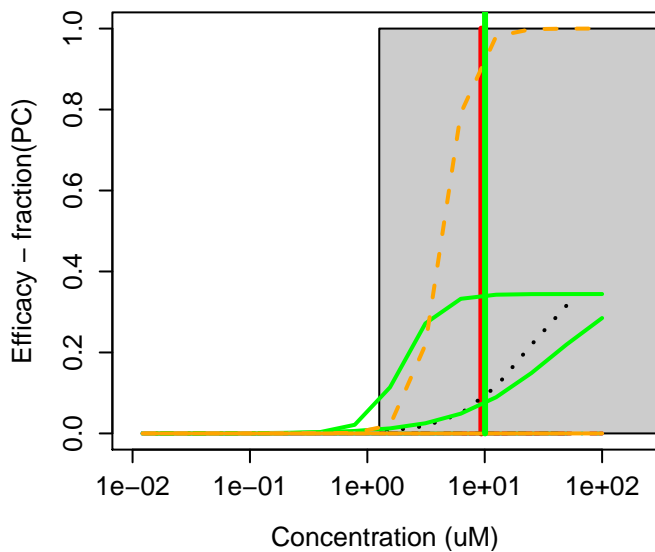

2312-35-8 : Propargite  
Agonist: 0 Antagonist: 0.19

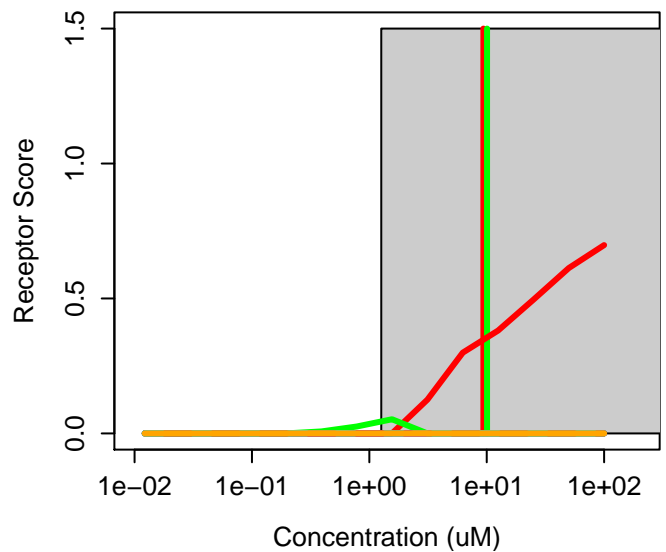

23135-22-0 : Oxamyl

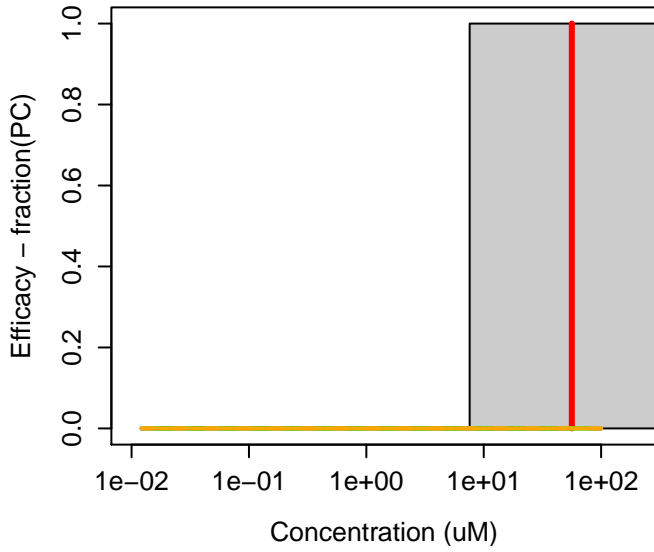

23135-22-0 : Oxamyl  
Agonist: 0 Antagonist: 0

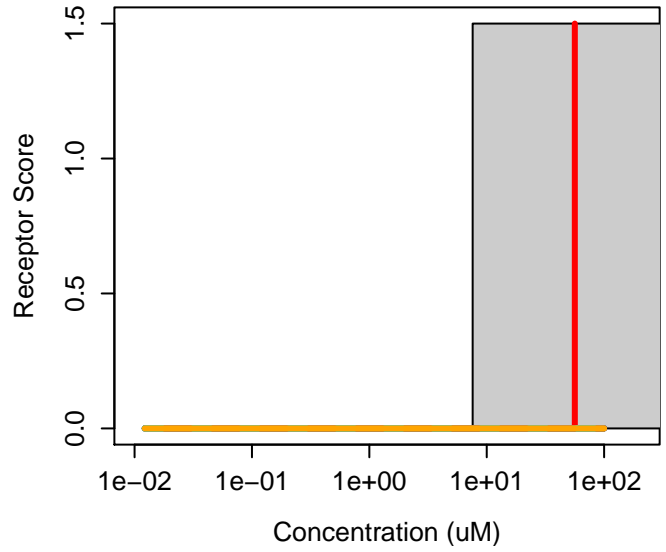

23184-66-9 : Butachlor

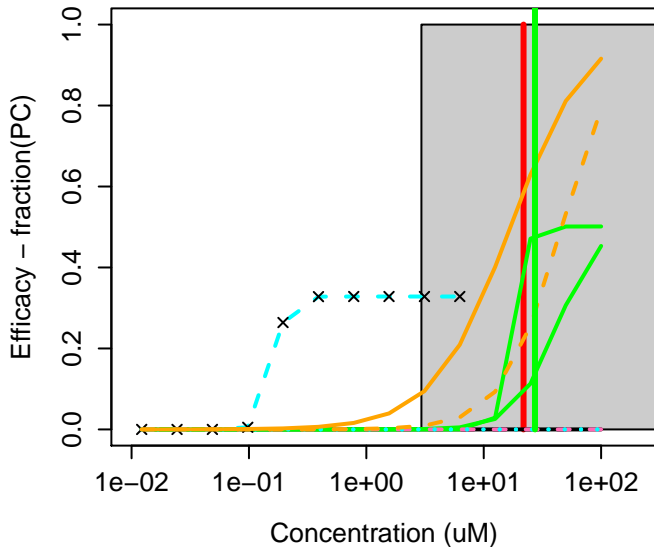

23184-66-9 : Butachlor  
Agonist: 0 Antagonist: 0.14

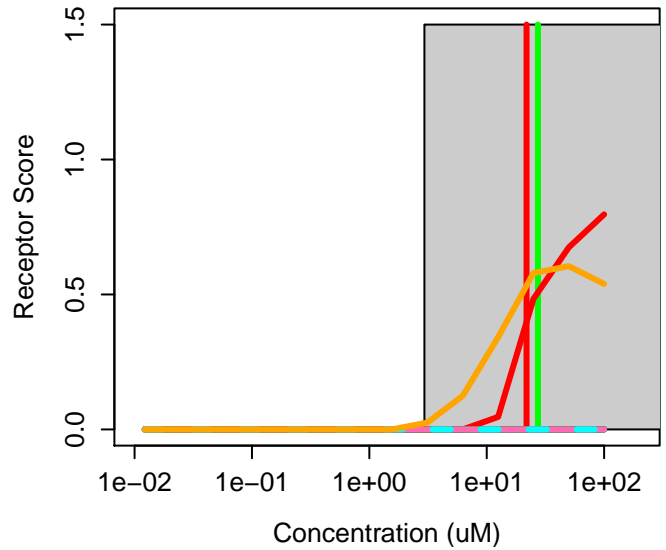

2321-07-5 : Fluorescein

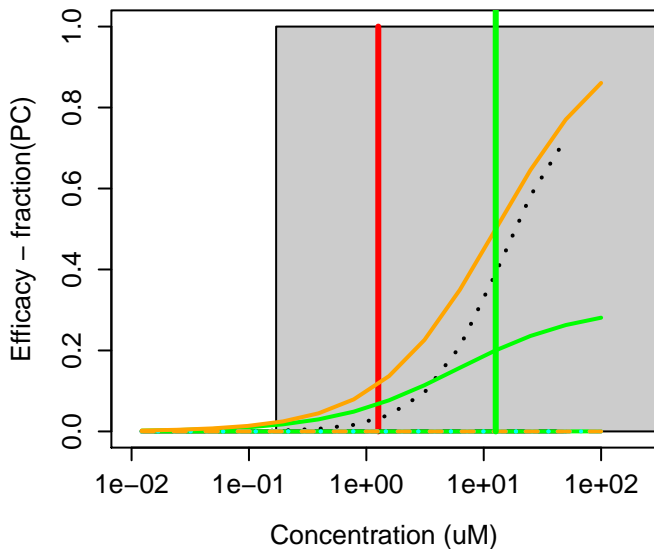

2321-07-5 : Fluorescein  
Agonist: 0 Antagonist: 0.19

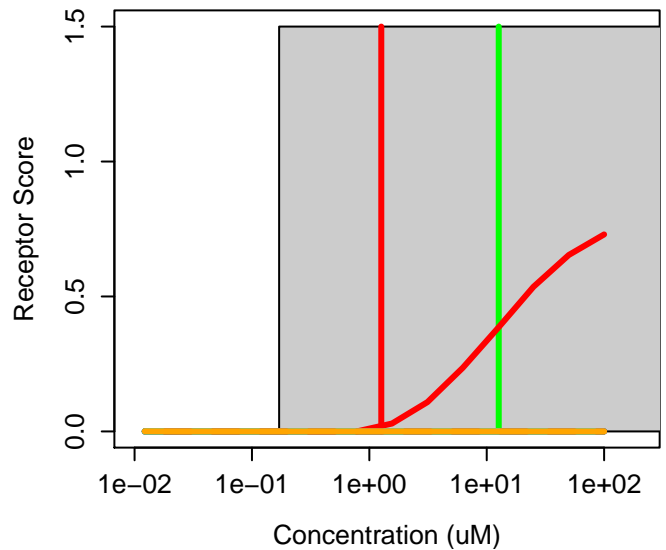

23386-52-9 : Dicyclohexyl sodium sulfosuccinat



23386-52-9 : Dicyclohexyl sodium sulfosuccinat  
Agonist: 0 Antagonist: 0



23422-53-9 : Formetanate hydrochloride

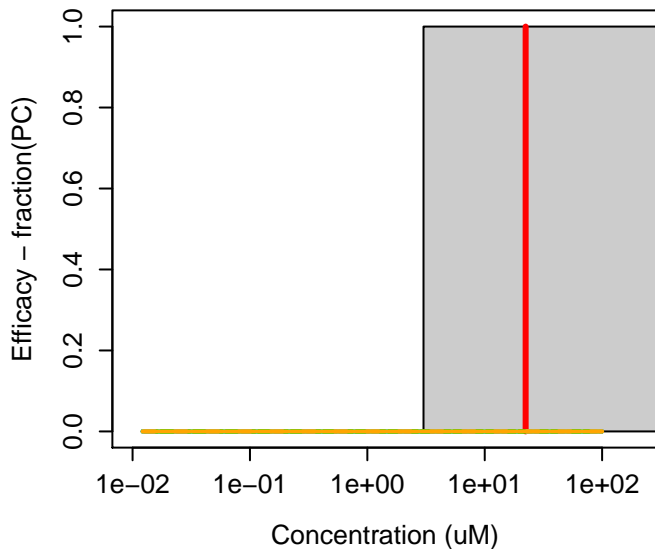

23422-53-9 : Formetanate hydrochloride  
Agonist: 0 Antagonist: 0

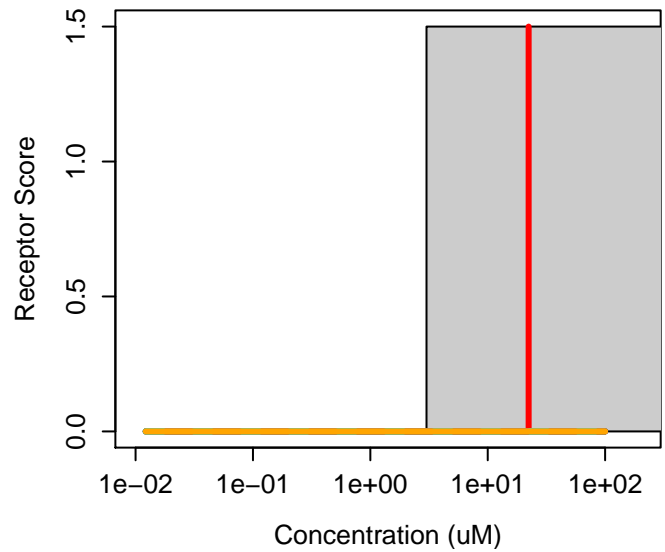

2353-45-9 : FD&C Green No. 3

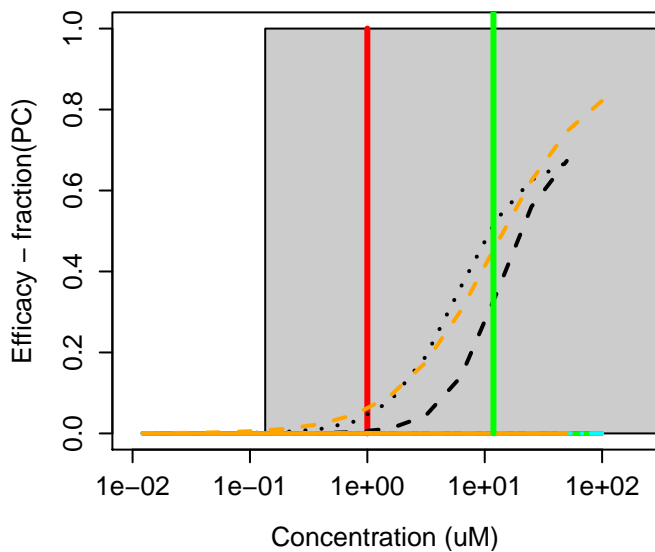

2353-45-9 : FD&C Green No. 3  
Agonist: 0 Antagonist: 0.21

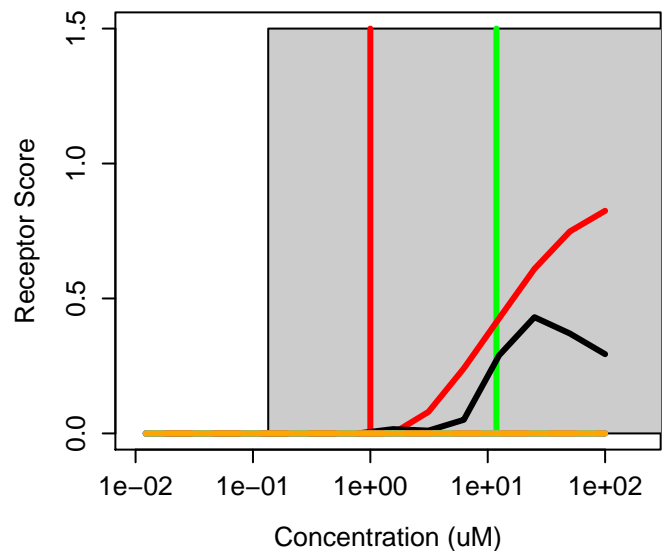

23564-05-8 : Thiophanate-methyl

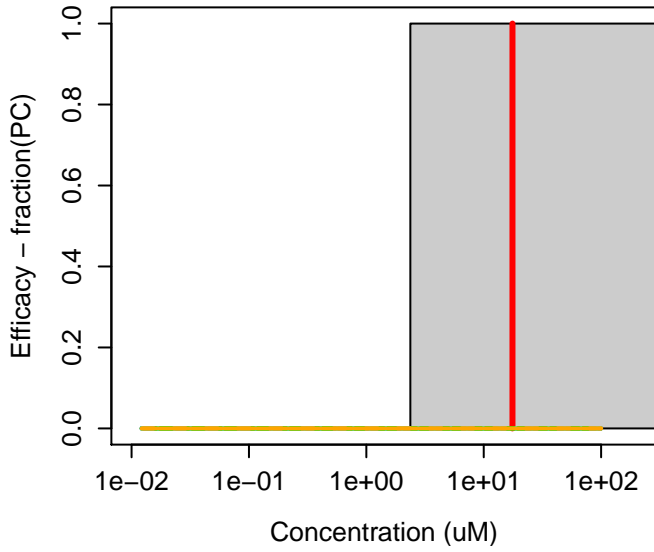

23564-05-8 : Thiophanate-methyl  
Agonist: 0 Antagonist: 0

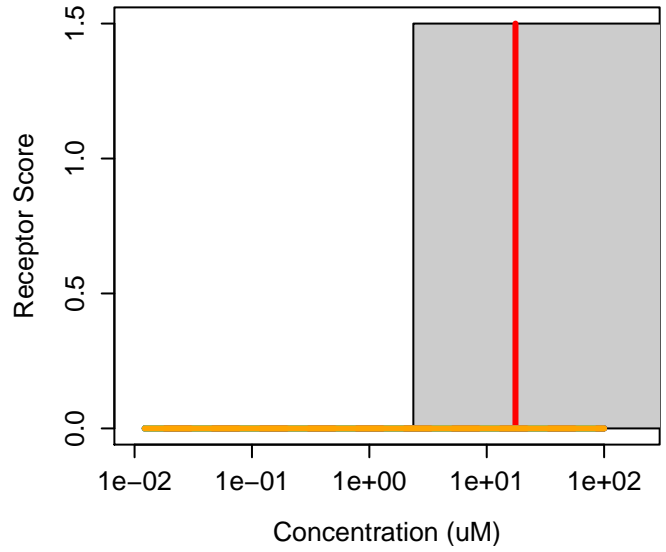

23564-06-9 : Thiophanate

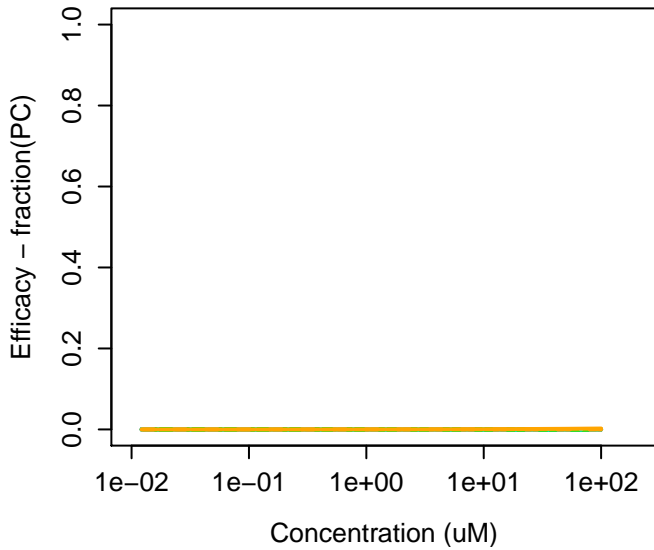

23564-06-9 : Thiophanate  
Agonist: 0 Antagonist: 0

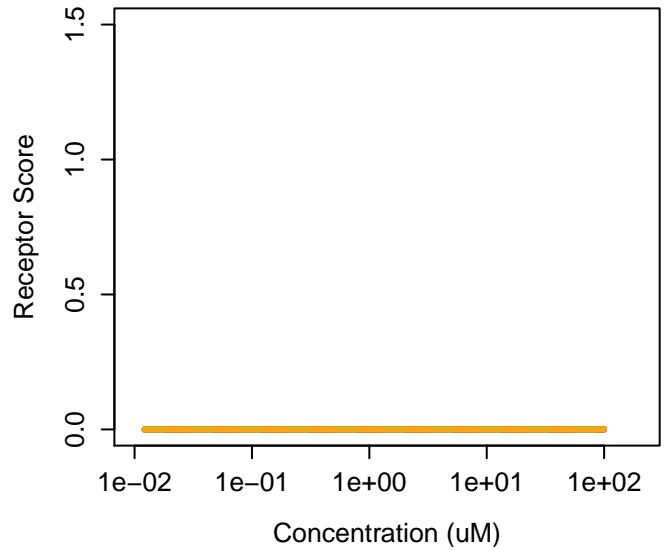

23593-75-1 : Clotrimazole

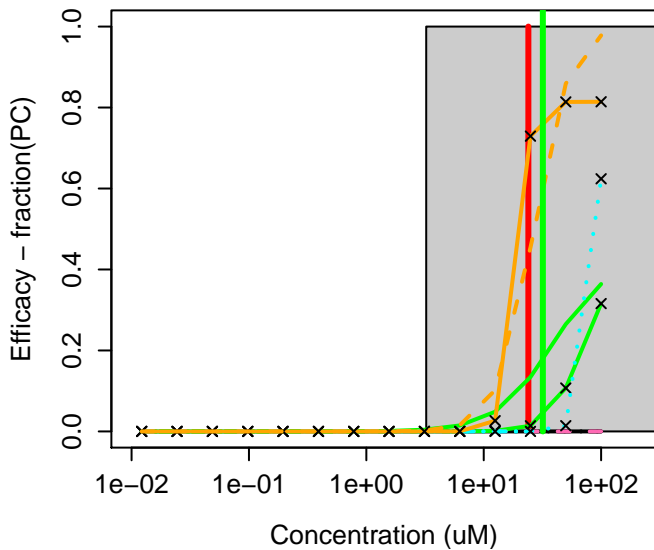

23593-75-1 : Clotrimazole  
Agonist: 0 Antagonist: 0.071

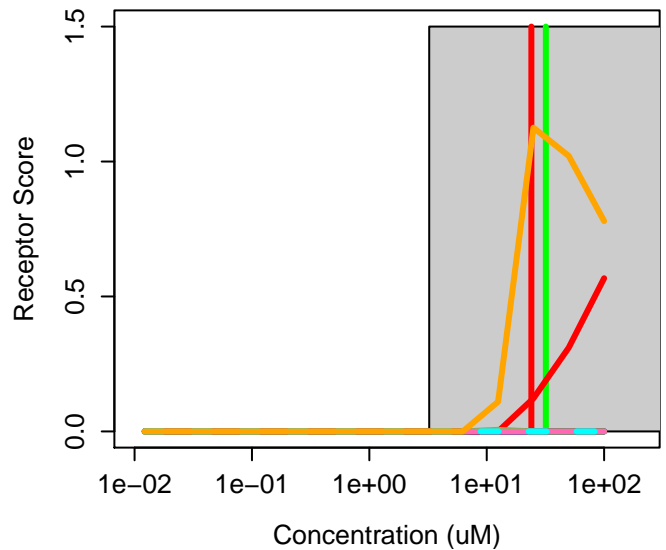



**23779-32-0 : 1-[3-(Triethoxysilyl)propyl]urea**



**23779-32-0 : 1-[3-(Triethoxysilyl)propyl]urea**  
Agonist: 0 Antagonist: 0



**2385-85-5 : Mirex**

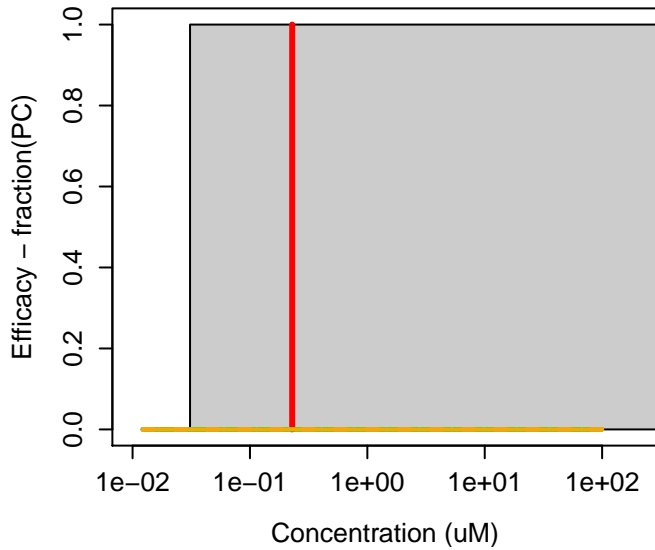

**2385-85-5 : Mirex**  
Agonist: 0 Antagonist: 0

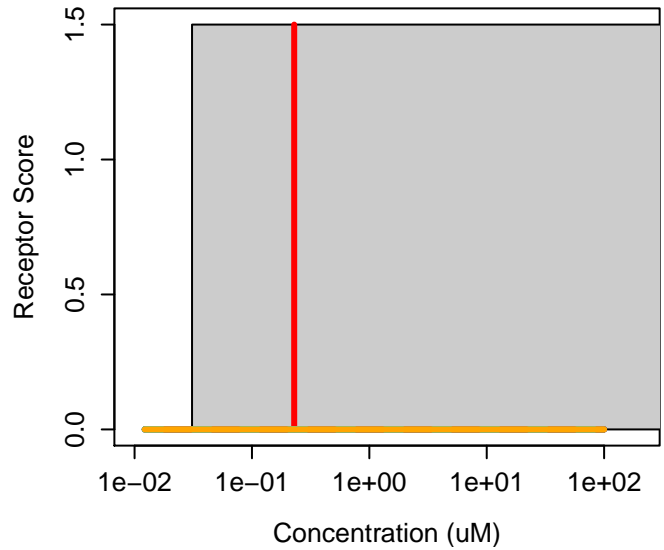

**2386-87-0 : UT-632**

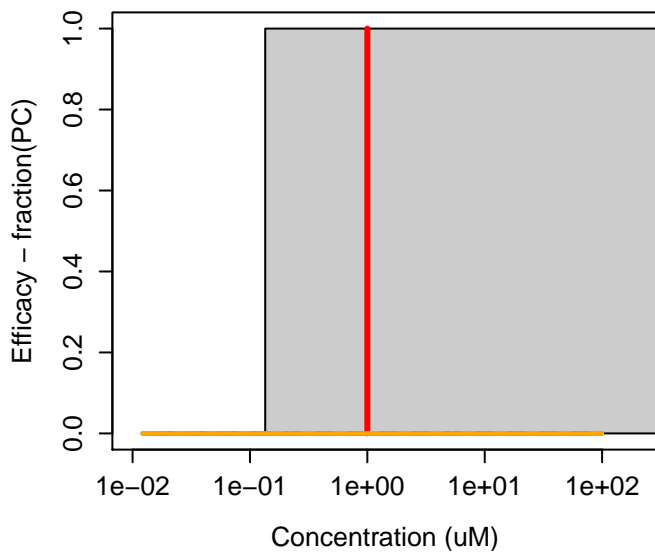

**2386-87-0 : UT-632**  
Agonist: 0 Antagonist: 0

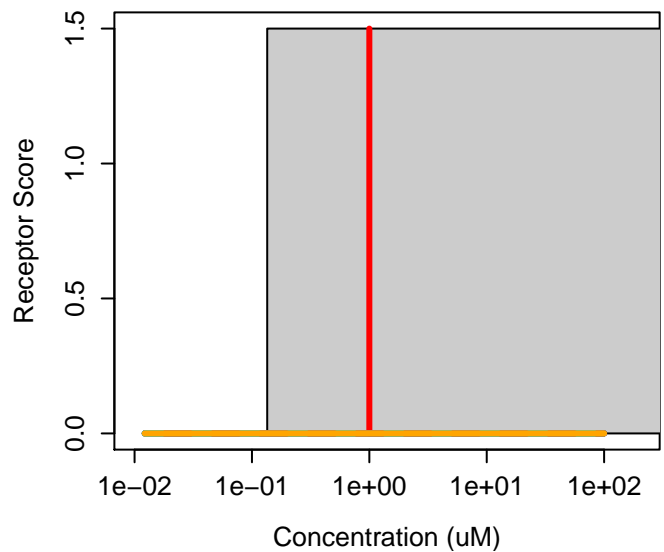

**2390-60-5 : Basic Blue 7**

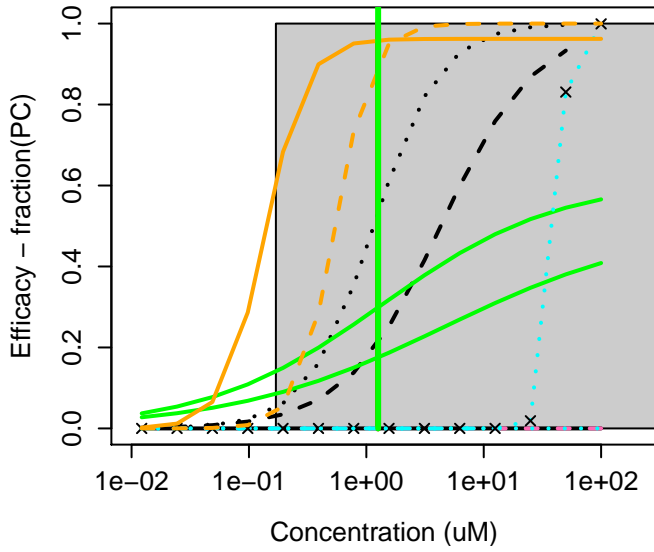

**2390-60-5 : Basic Blue 7**  
Agonist: 0 Antagonist: 0.81

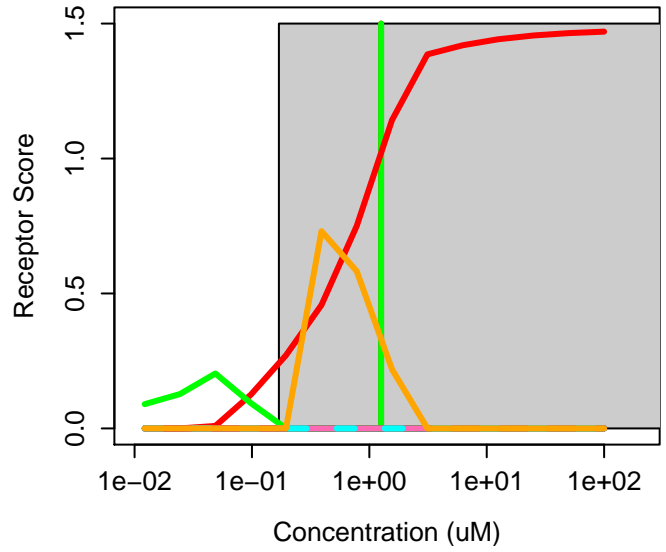

**2392-39-4 : Dexamethasone sodium phosphate**

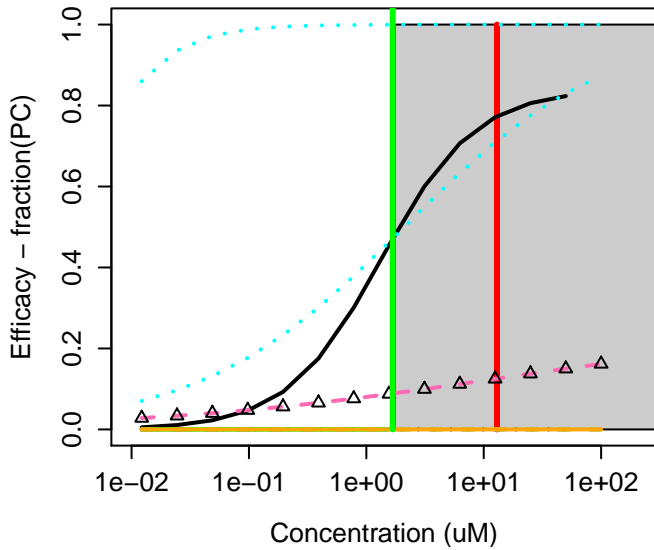

**2392-39-4 : Dexamethasone sodium phosphate**  
Agonist: 0.34 Antagonist: 0

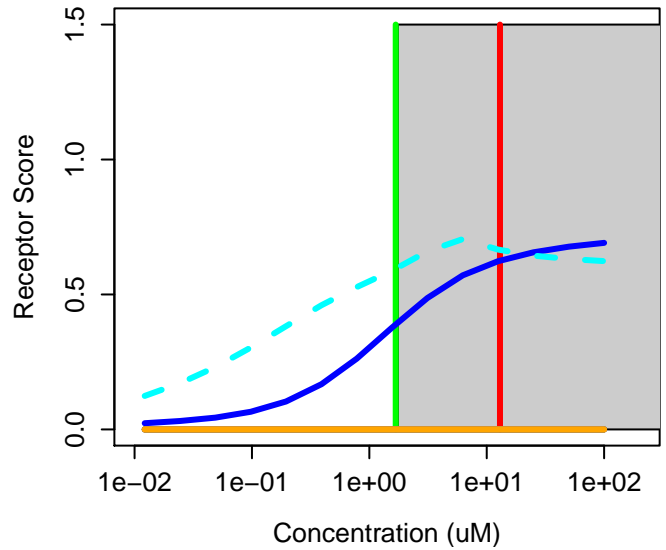

**23950-58-5 : Propyzamide**

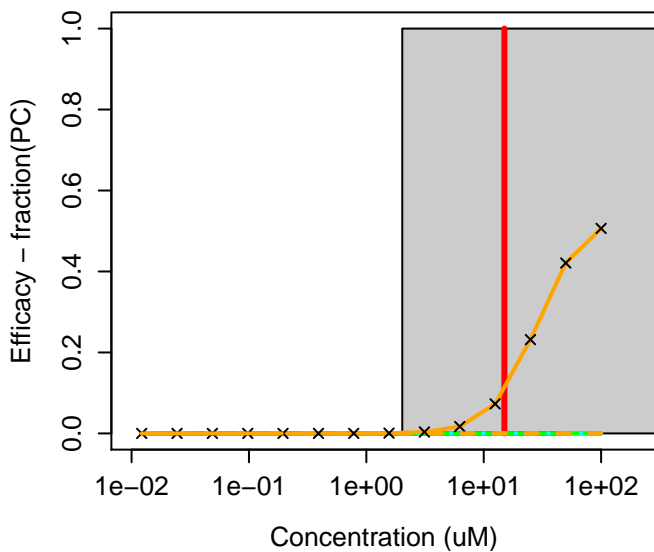

**23950-58-5 : Propyzamide**  
Agonist: 0 Antagonist: 0

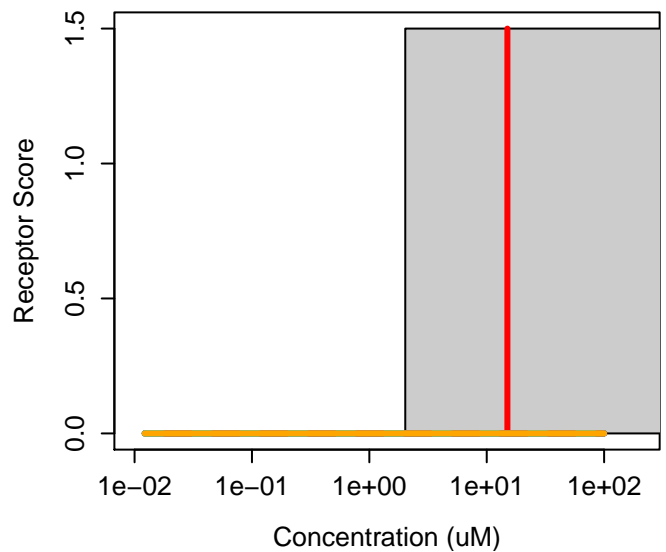

2396-68-1 : 4-tert-Butylbenzenethiol



2396-68-1 : 4-tert-Butylbenzenethiol  
Agonist: 0 Antagonist: 0



2409-55-4 : 2-tert-Butyl-4-methylphenol

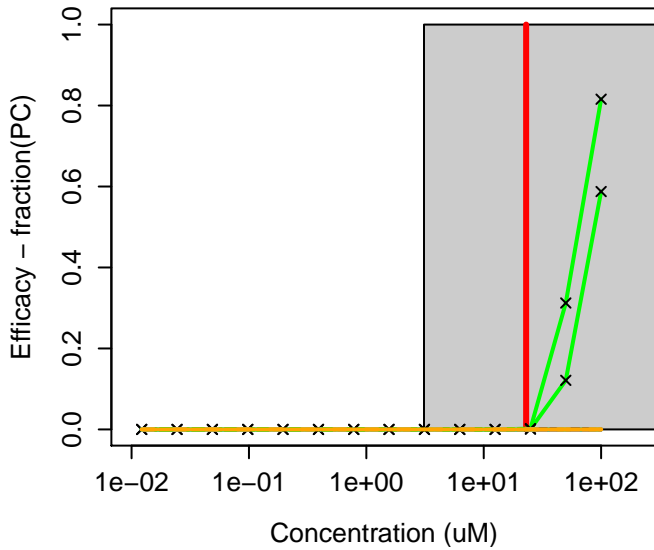

2409-55-4 : 2-tert-Butyl-4-methylphenol  
Agonist: 0 Antagonist: 0

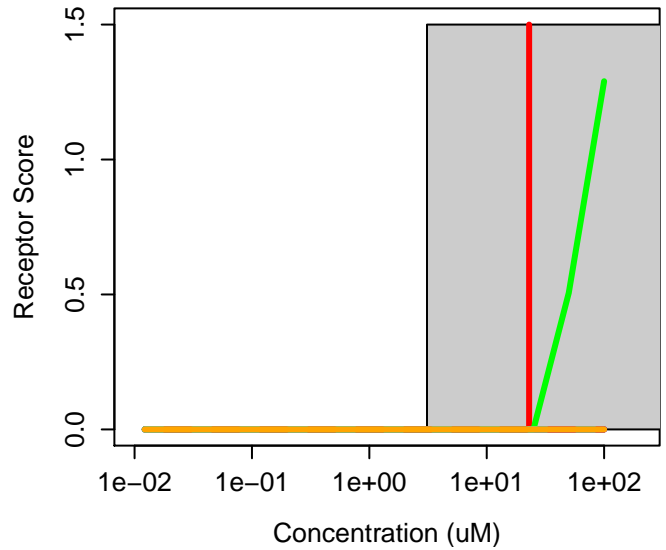

24157-81-1 : 2,6-Diisopropylnaphthalene



24157-81-1 : 2,6-Diisopropylnaphthalene  
Agonist: 0 Antagonist: 0



24169-02-6 : Econazole nitrate

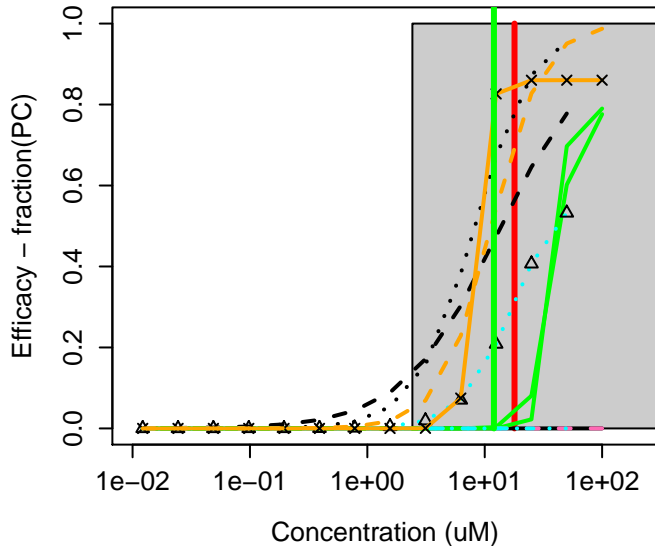

24169-02-6 : Econazole nitrate  
Agonist: 0 Antagonist: 0.4

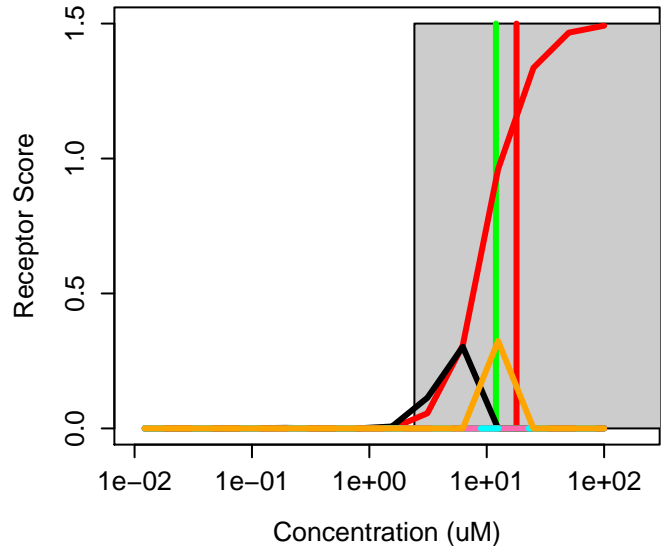

2416-94-6 : 2,3,6-Trimethylphenol

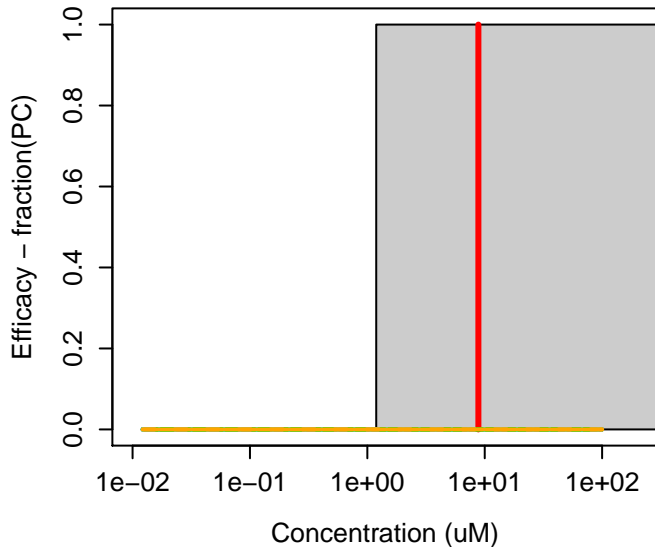

2416-94-6 : 2,3,6-Trimethylphenol  
Agonist: 0 Antagonist: 0

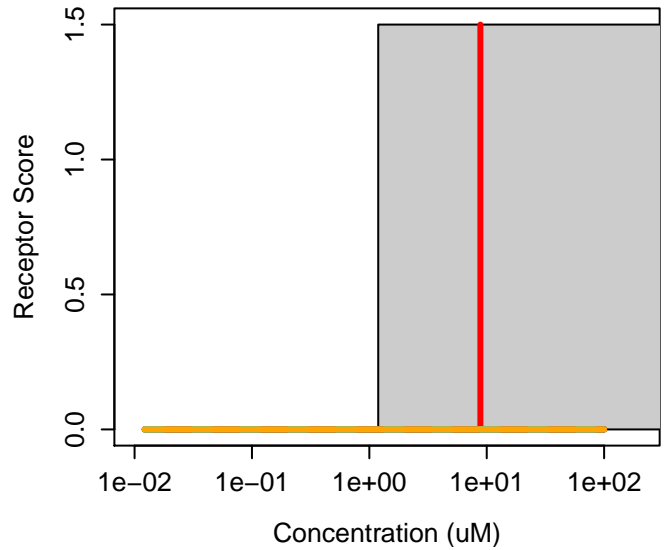

2425-06-1 : Captafol

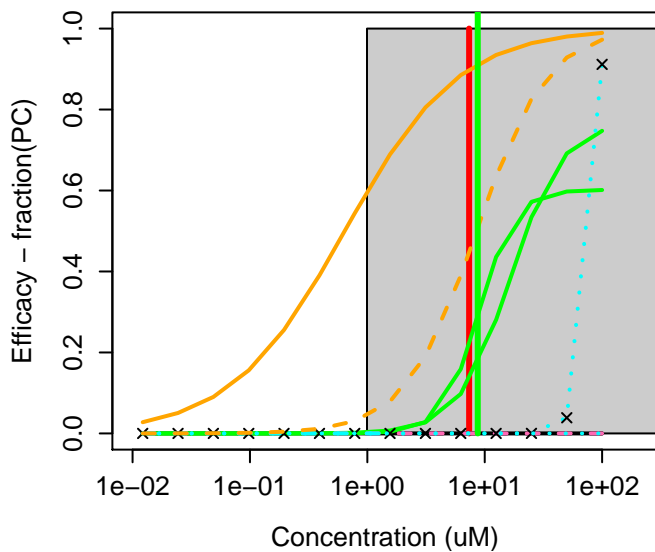

2425-06-1 : Captafol  
Agonist: 0 Antagonist: 0.29

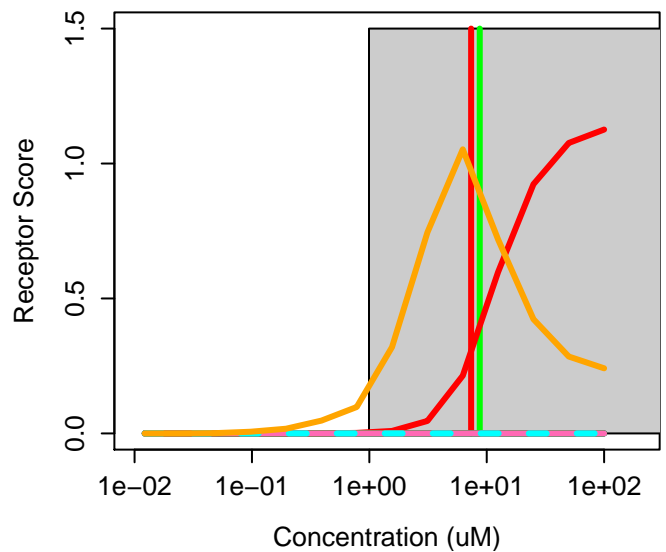

2425-77-6 : 2-Hexyl-1-decanol

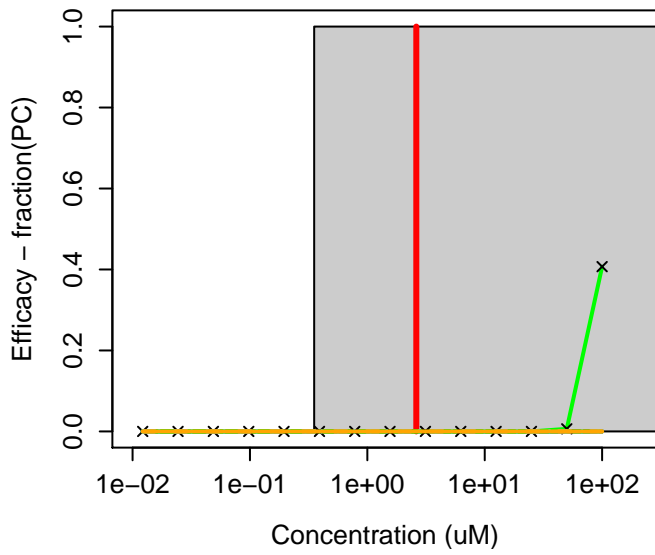

2425-77-6 : 2-Hexyl-1-decanol  
Agonist: 0 Antagonist: 0

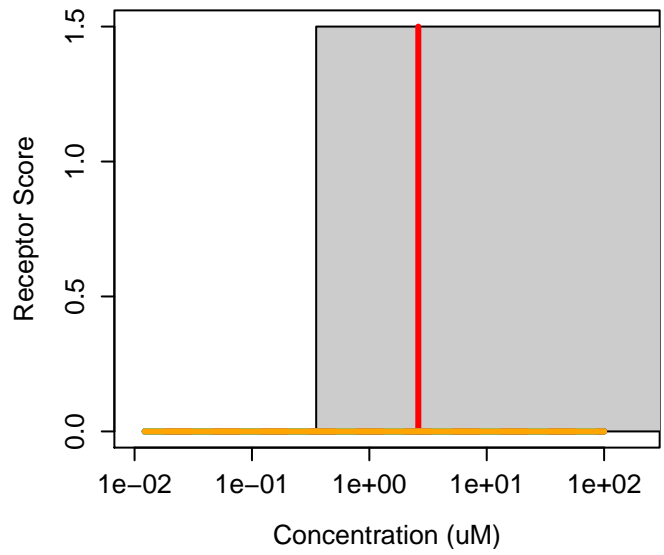

2426-08-6 : Butyl glycidyl ether



2426-08-6 : Butyl glycidyl ether  
Agonist: 0 Antagonist: 0



24307-26-4 : Mepiquat chloride



24307-26-4 : Mepiquat chloride  
Agonist: 0 Antagonist: 0



2432-87-3 : Dioctyl succinate



2432-87-3 : Dioctyl succinate  
Agonist: 0 Antagonist: 0



2433-14-9 : 4-Cyclohexylcyclohexanol

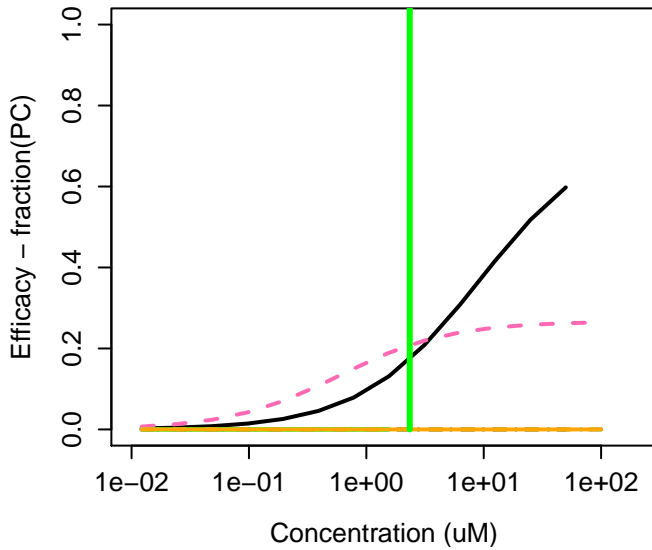

2433-14-9 : 4-Cyclohexylcyclohexanol  
Agonist: 0.049 Antagonist: 0

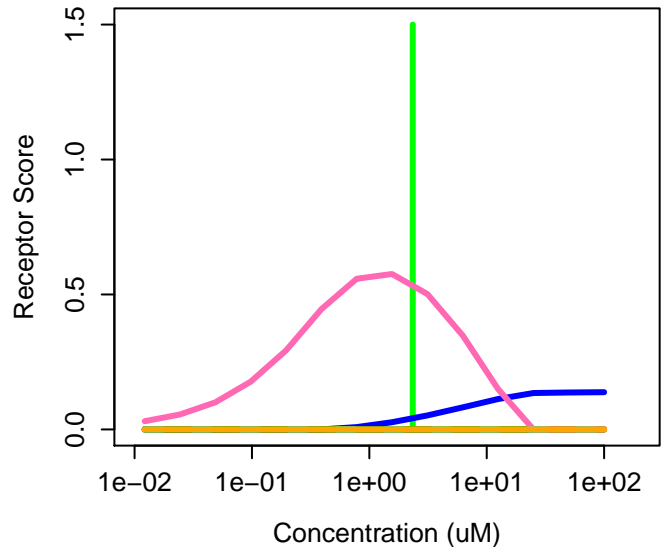

2440-22-4 : 2-(2H-Benzotriazol-2-yl)-4-methylph... 2440-22-4 : 2-(2H-Benzotriazol-2-yl)-4-methylph...  
Agonist: 0 Antagonist: 0

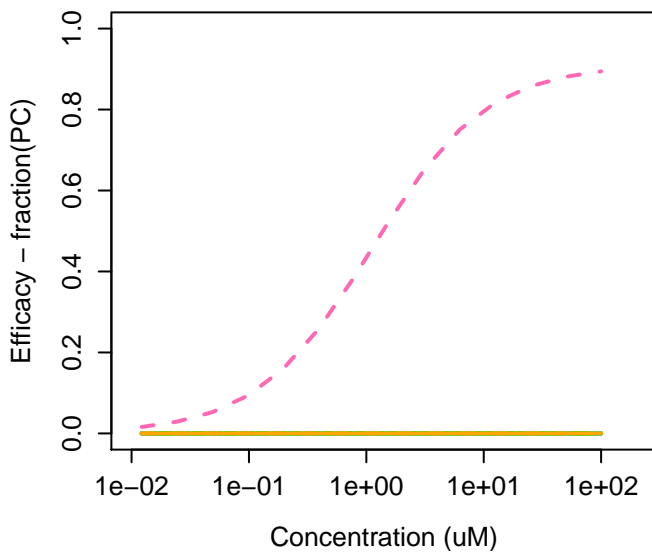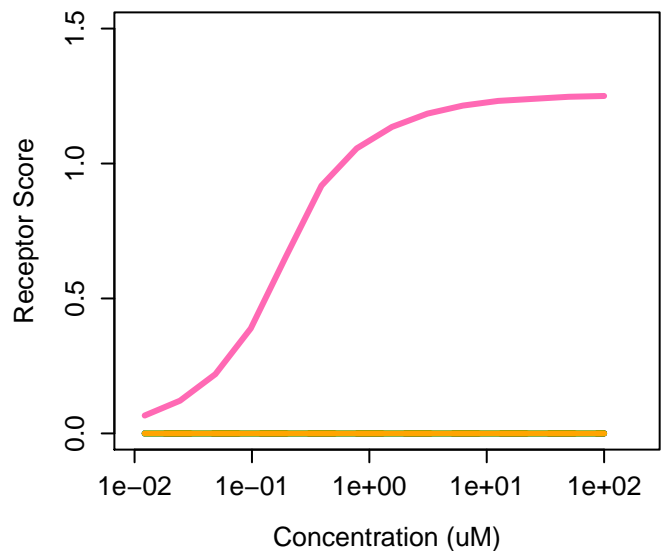

**2445-77-4 : 2-Methylbutyl isovalerate**



**2445-77-4 : 2-Methylbutyl isovalerate  
Agonist: 0 Antagonist: 0**



**2451-62-9 : Triglycidyl isocyanurate**

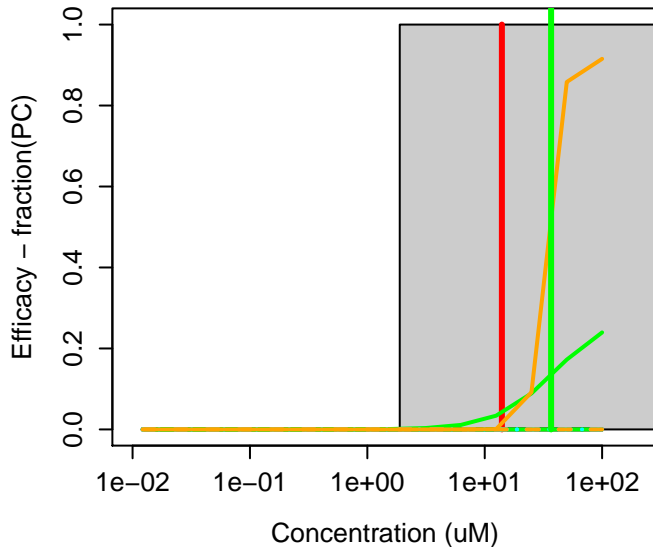

**2451-62-9 : Triglycidyl isocyanurate  
Agonist: 0 Antagonist: 0.021**

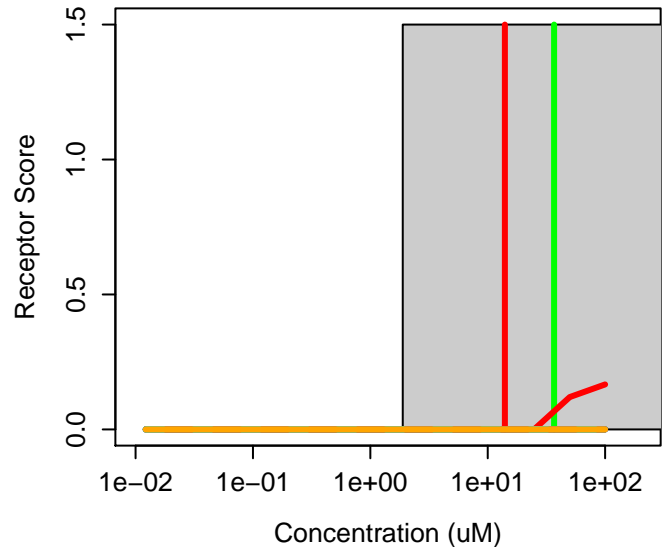

**24549-06-2 : 2-Ethyl-6-methylaniline**



**24549-06-2 : 2-Ethyl-6-methylaniline  
Agonist: 0 Antagonist: 0**



2457-01-4 : Barium bis(2-ethylhexanoate)



2457-01-4 : Barium bis(2-ethylhexanoate)  
Agonist: 0 Antagonist: 0



24602-86-6 : Tridemorph

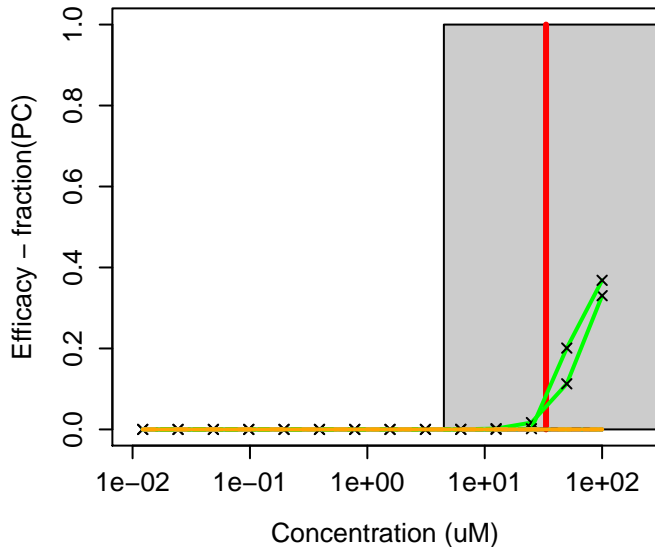

24602-86-6 : Tridemorph  
Agonist: 0 Antagonist: 0

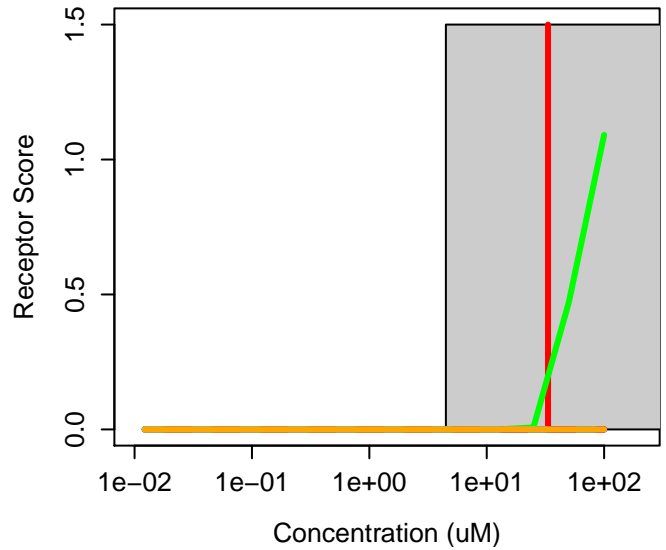

2465-27-2 : Auramine hydrochloride

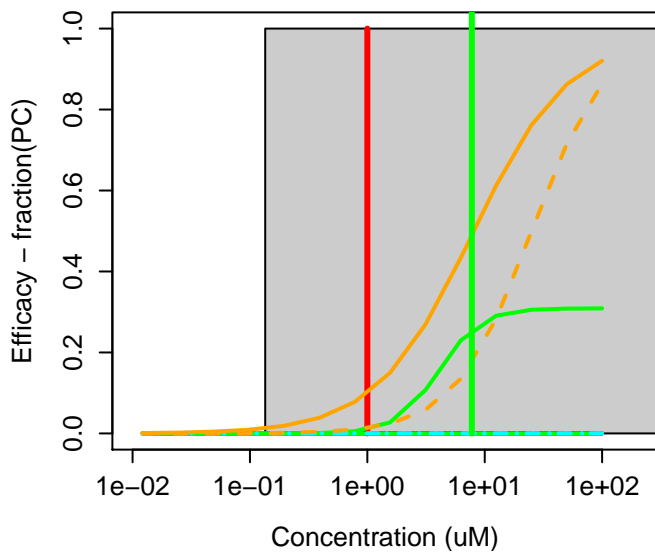

2465-27-2 : Auramine hydrochloride  
Agonist: 0 Antagonist: 0.09

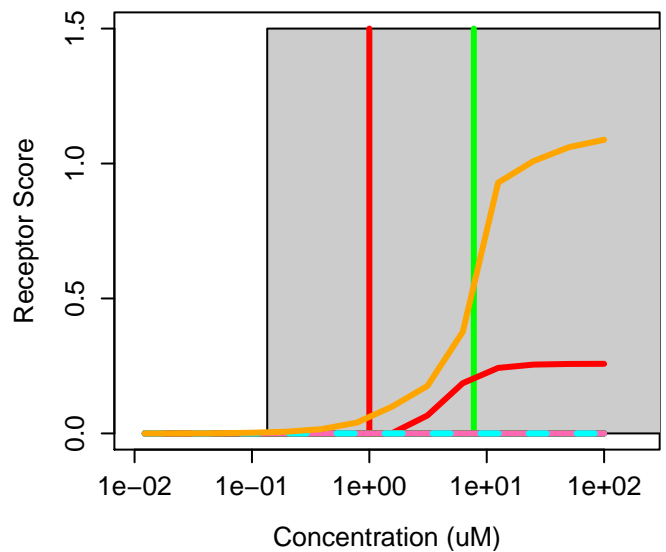



2467-02-9 : Bisphenol F

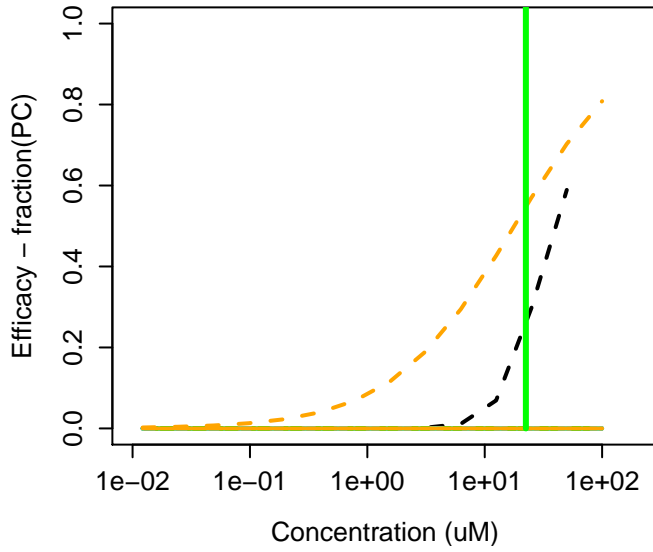

2467-02-9 : Bisphenol F  
Agonist: 0 Antagonist: 0.079

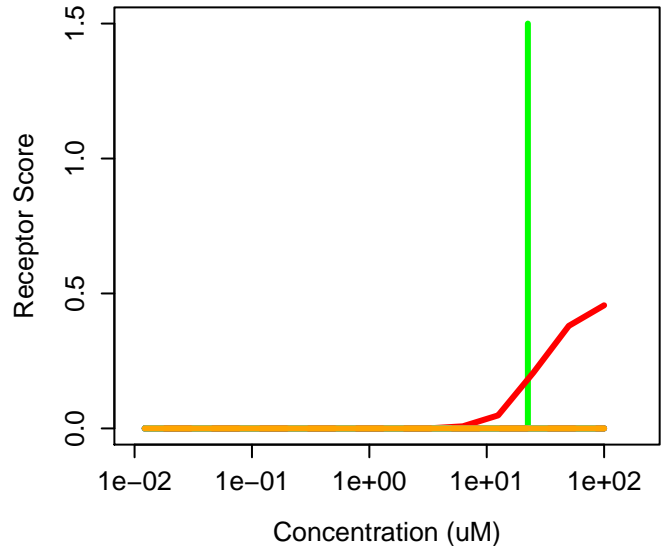

24800-44-0 : Tripropylene glycol



24800-44-0 : Tripropylene glycol  
Agonist: 0 Antagonist: 0



24851-98-7 : Methyl dihydrojasmonate



24851-98-7 : Methyl dihydrojasmonate  
Agonist: 0 Antagonist: 0



2491-38-5 : 2-Bromo-4-hydroxyacetophenone



2491-38-5 : 2-Bromo-4-hydroxyacetophenone  
Agonist: 0 Antagonist: 0



2492-26-4 : Sodium 2-mercaptobenzothiolate

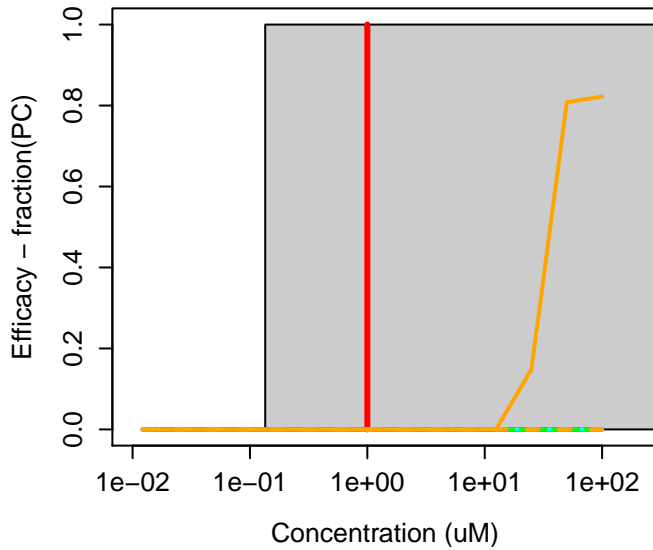

2492-26-4 : Sodium 2-mercaptobenzothiolate  
Agonist: 0 Antagonist: 0

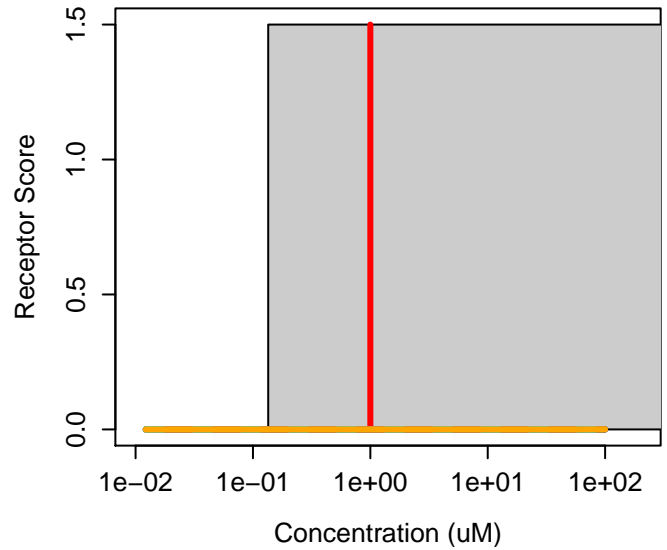

249296-43-3 : CJ-013610

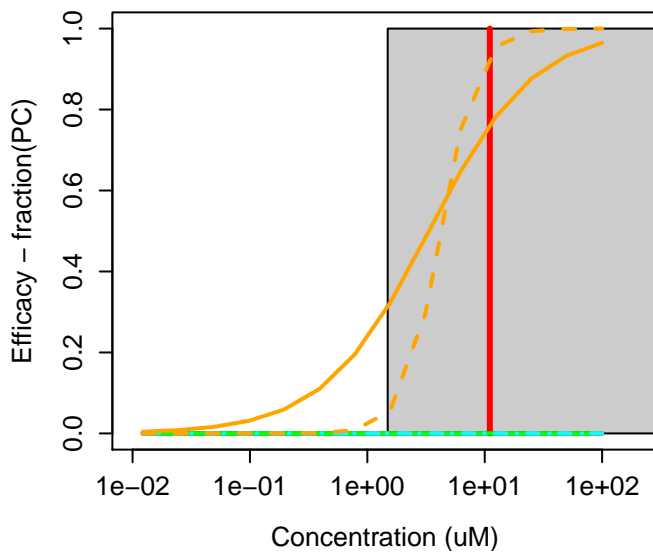

249296-43-3 : CJ-013610  
Agonist: 0 Antagonist: 0.00052

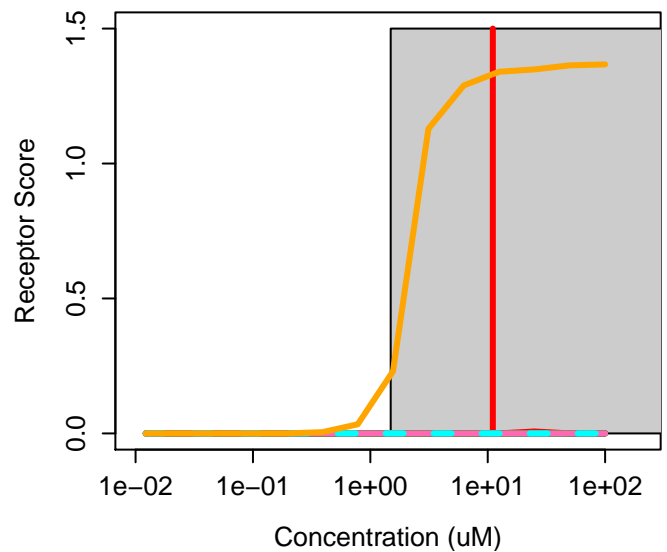

25057-89-0 : Bentazone

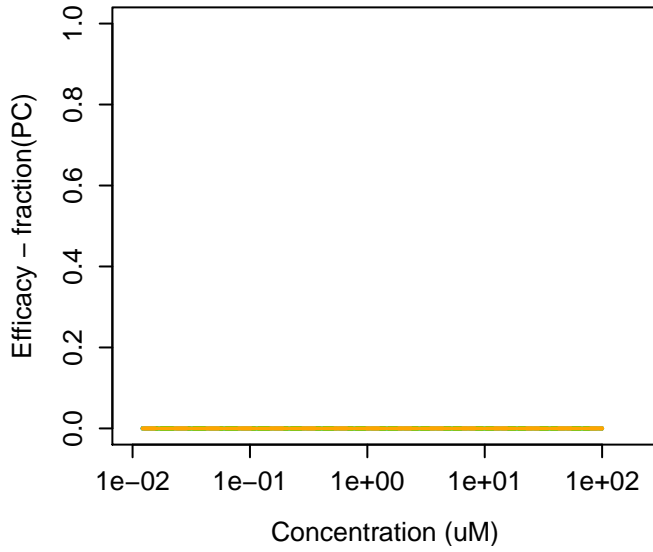

25057-89-0 : Bentazone  
Agonist: 0 Antagonist: 0



25155-18-4 : Methylbenzethonium chloride

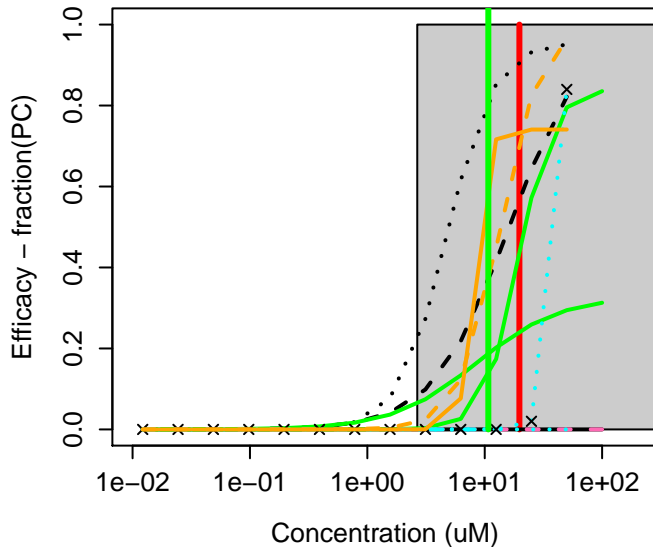

25155-18-4 : Methylbenzethonium chloride  
Agonist: 0.0015 Antagonist: 0.43

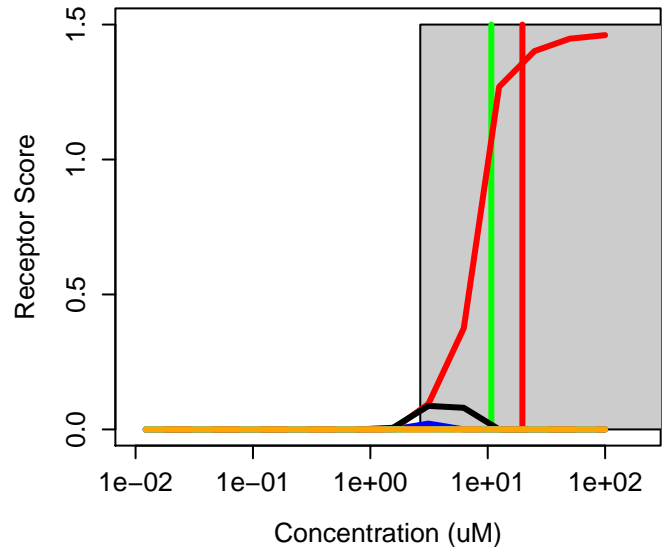

25155-30-0 : Sodium dodecylbenzenesulfonate

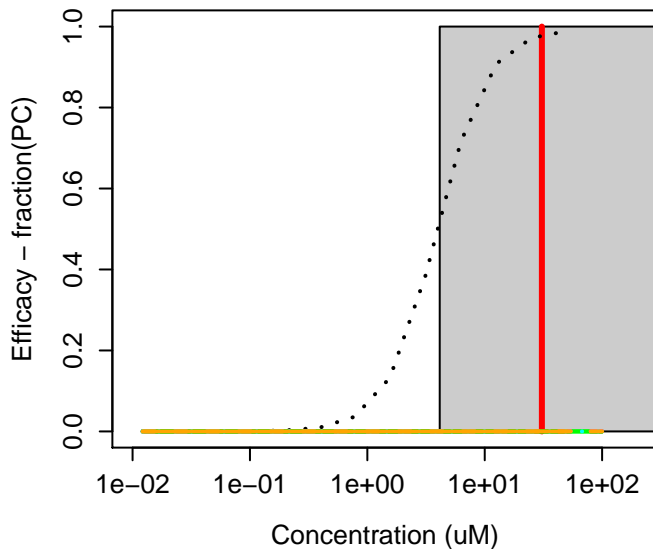

25155-30-0 : Sodium dodecylbenzenesulfonate  
Agonist: 0 Antagonist: 0

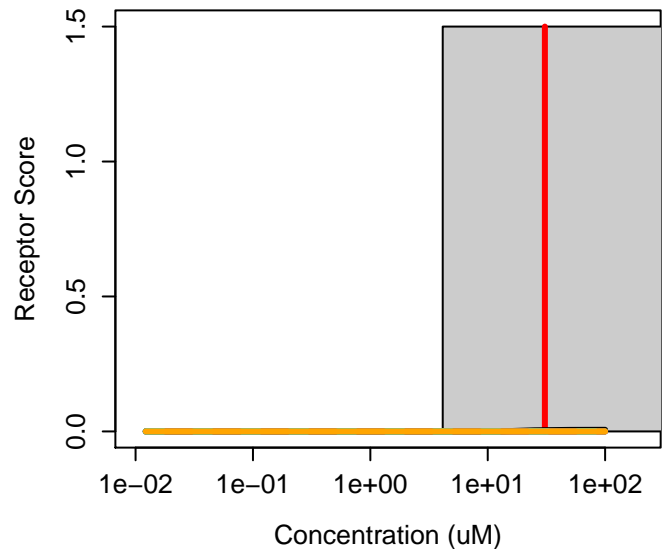

**25168-05-2 : Chlorotoluene**



**25168-05-2 : Chlorotoluene  
Agonist: 0 Antagonist: 0**



**25265-71-8 : Dipropylene glycol**



**25265-71-8 : Dipropylene glycol  
Agonist: 0 Antagonist: 0**



**2528-16-7 : Monobenzyl phthalate**

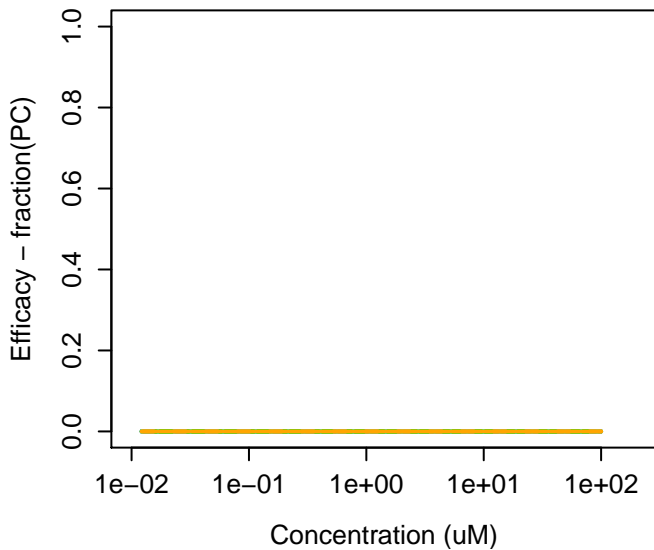

**2528-16-7 : Monobenzyl phthalate  
Agonist: 0 Antagonist: 0**



25322-69-4 : Polypropylene glycol

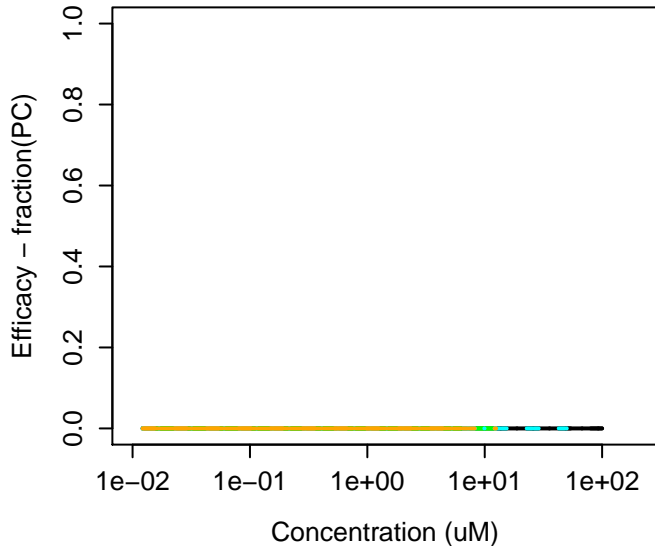

25322-69-4 : Polypropylene glycol  
Agonist: 0 Antagonist: 0



253450-09-8 : Besonprodil

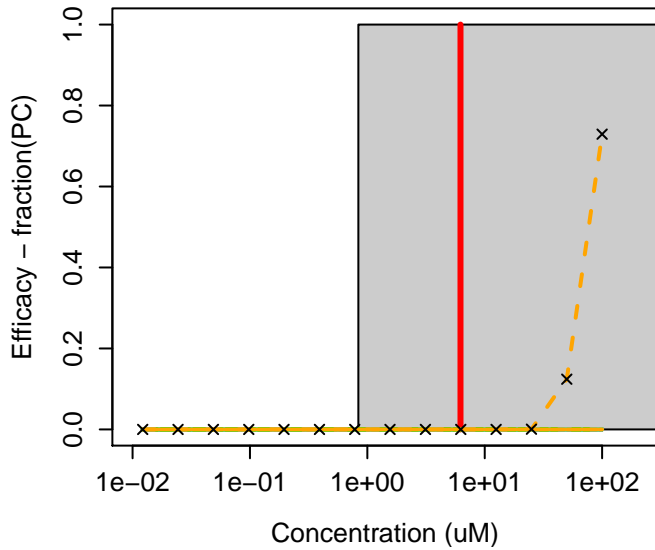

253450-09-8 : Besonprodil  
Agonist: 0 Antagonist: 0

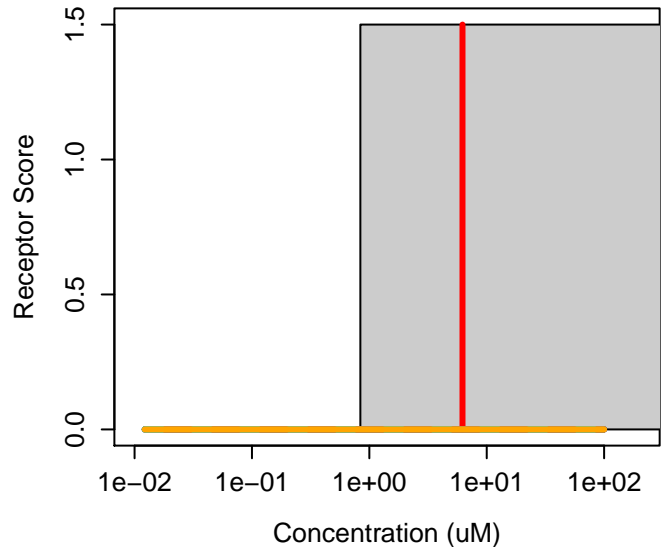

25360-10-5 : tert-Nonanethiol



25360-10-5 : tert-Nonanethiol  
Agonist: 0 Antagonist: 0



25496-72-4 : Glycerol monooleate

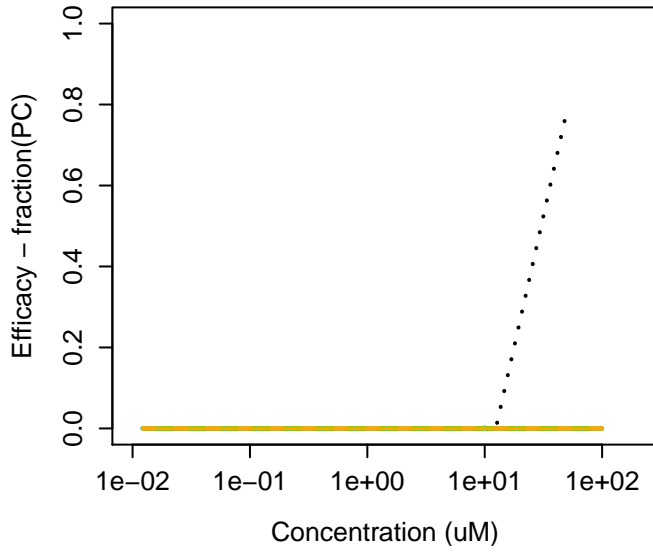

25496-72-4 : Glycerol monooleate  
Agonist: 0 Antagonist: 0



25498-49-1 : Tripropylene glycol monomethyl eth



25498-49-1 : Tripropylene glycol monomethyl eth  
Agonist: 0 Antagonist: 0



2550-40-5 : Dicyclohexyl disulfide

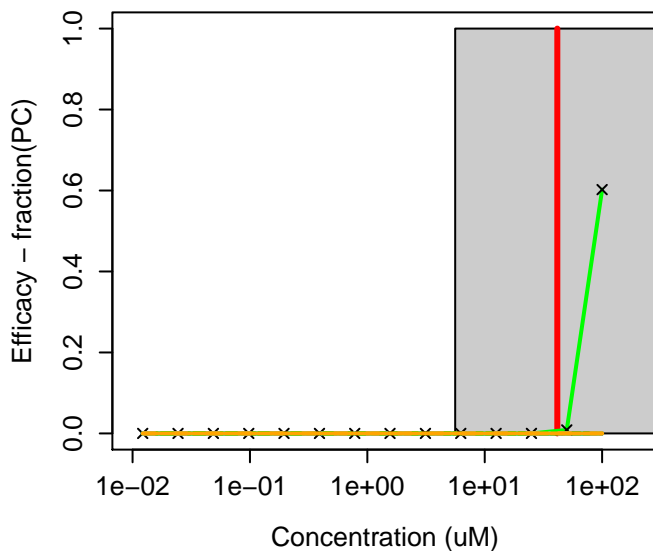

2550-40-5 : Dicyclohexyl disulfide  
Agonist: 0 Antagonist: 0

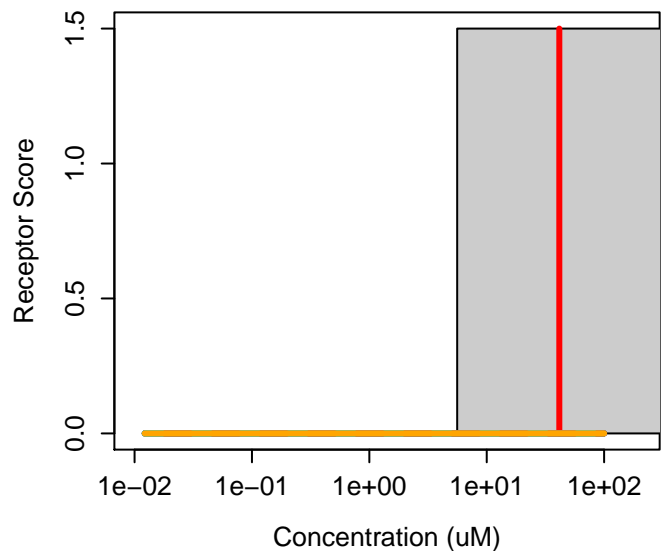

**-06-5 : 1,3,5,7-Tetramethyl-1,3,5,7-tetravinylcyclotet** **-06-5 : 1,3,5,7-Tetramethyl-1,3,5,7-tetravinylcyclotet**  
**Agonist: 0 Antagonist: 0**

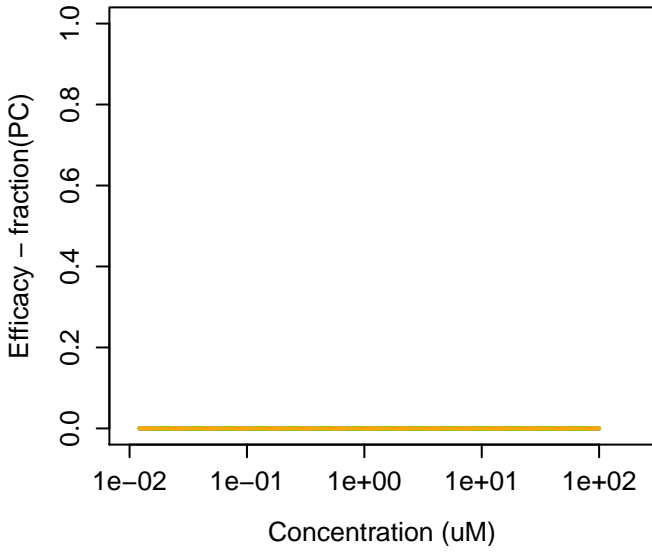

**25550-98-5 : Diisodecylphenyl phosphite**

**25550-98-5 : Diisodecylphenyl phosphite**  
**Agonist: 0 Antagonist: 0**

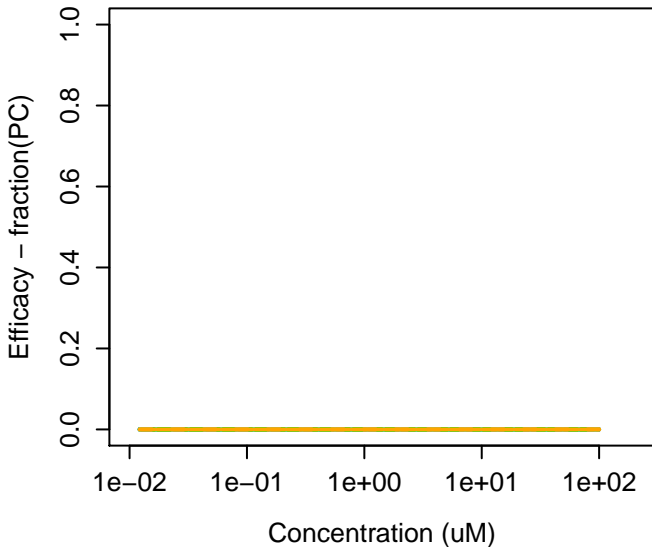

**25606-41-1 : Propamocarb hydrochloride**

**25606-41-1 : Propamocarb hydrochloride**  
**Agonist: 0 Antagonist: 0**

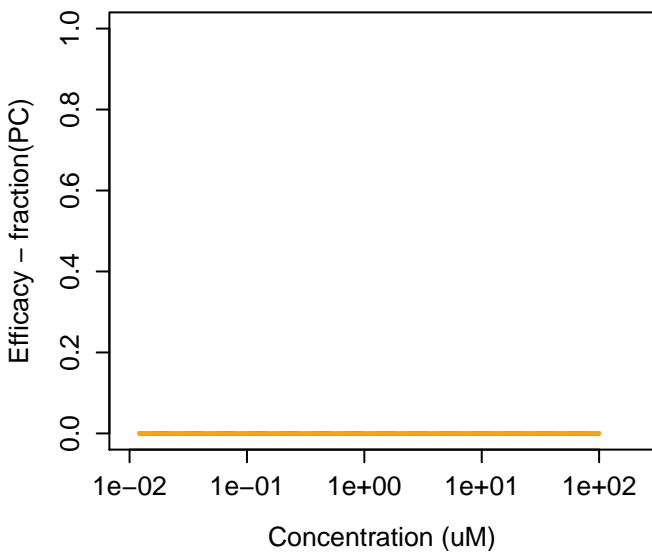

**25638-17-9 : Butylphthalenesulfonic acid sodium** **25638-17-9 : Butylphthalenesulfonic acid sodium**  
**Agonist: 0 Antagonist: 0**

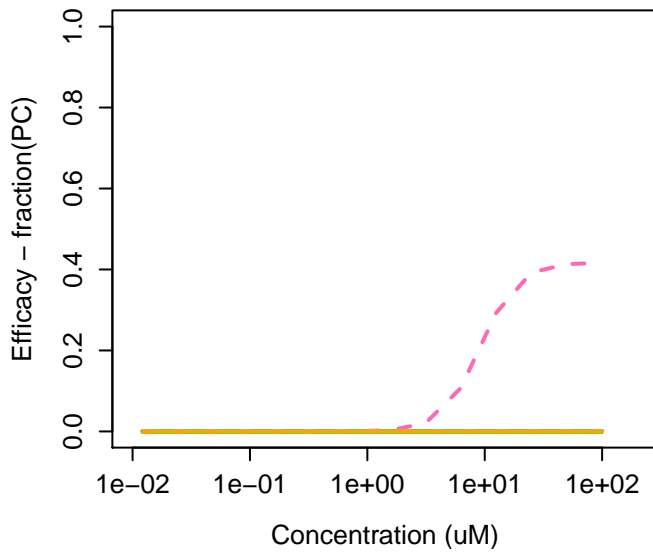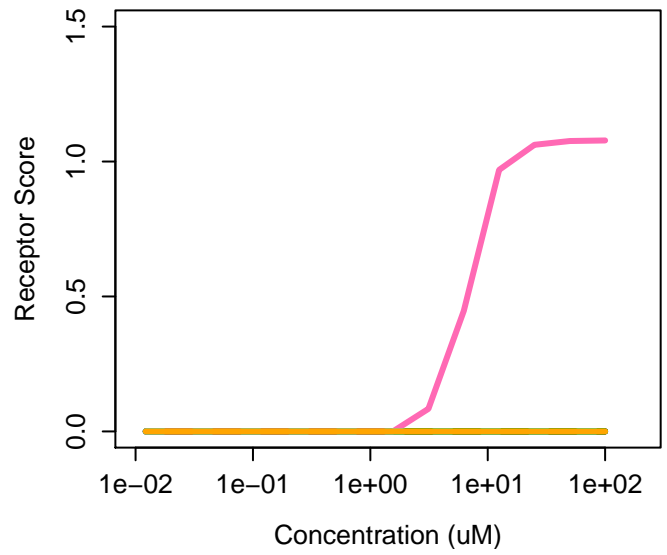

**25812-30-0 : Gemfibrozil**

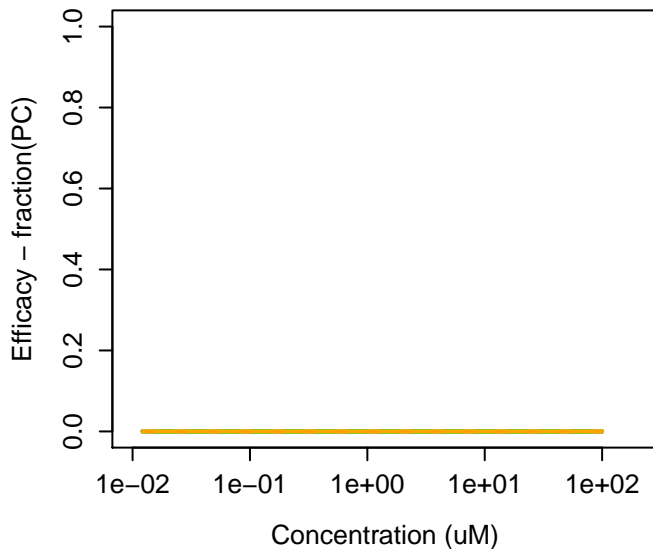

**25812-30-0 : Gemfibrozil**  
**Agonist: 0 Antagonist: 0**

**2593-15-9 : Etridiazole**

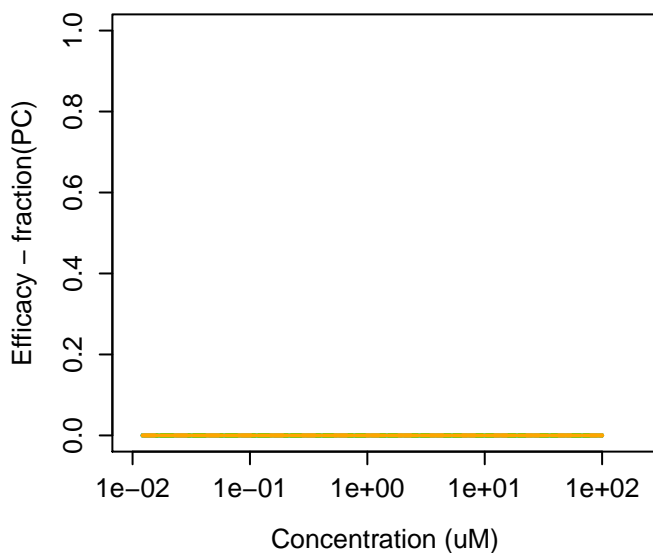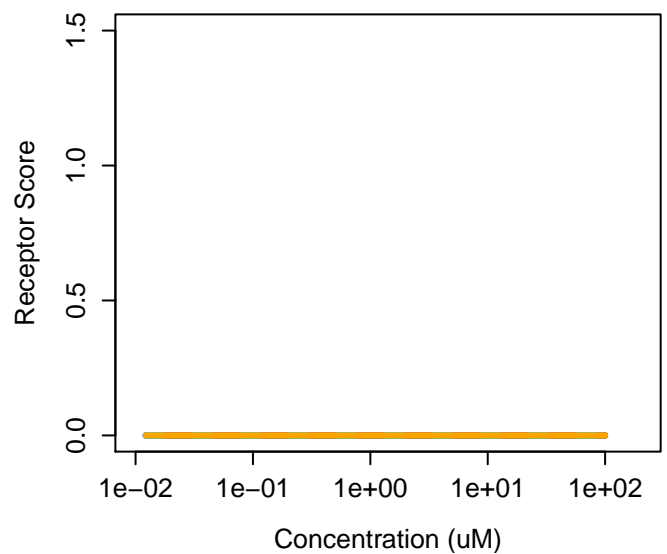

**2593-15-9 : Etridiazole**  
**Agonist: 0 Antagonist: 0**



25956-17-6 : Allura Red C.I.16035

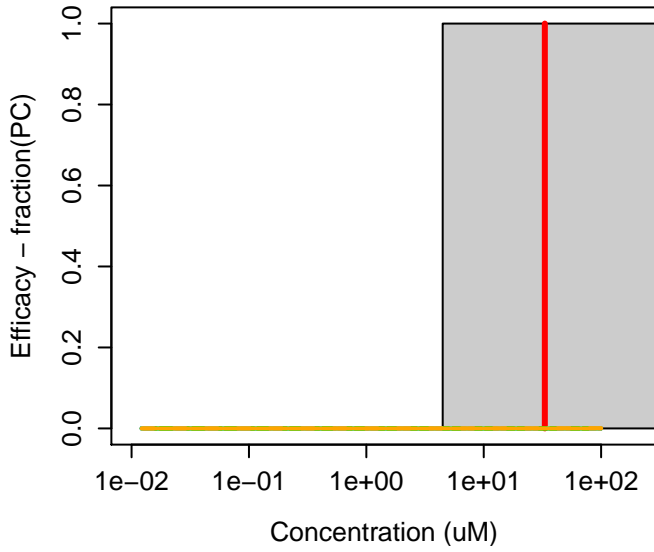

25956-17-6 : Allura Red C.I.16035  
Agonist: 0 Antagonist: 0

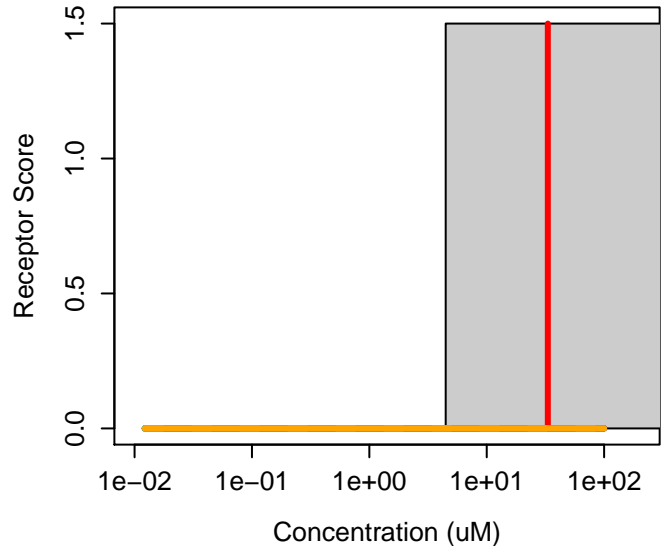

26002-80-2 : Phenothrin

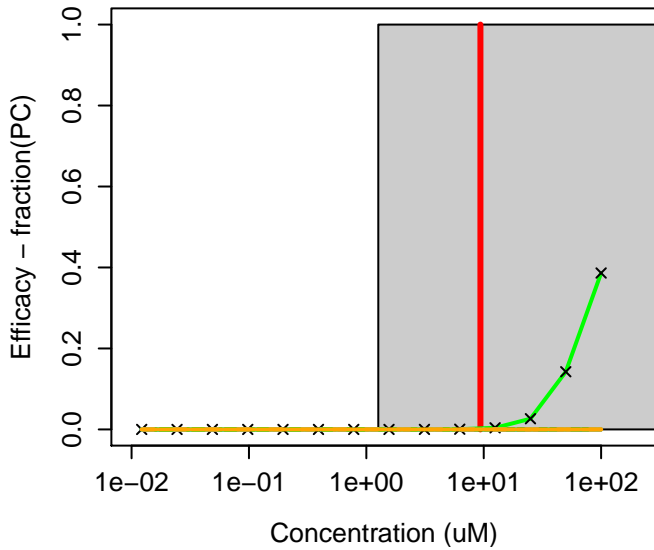

26002-80-2 : Phenothrin  
Agonist: 0 Antagonist: 0

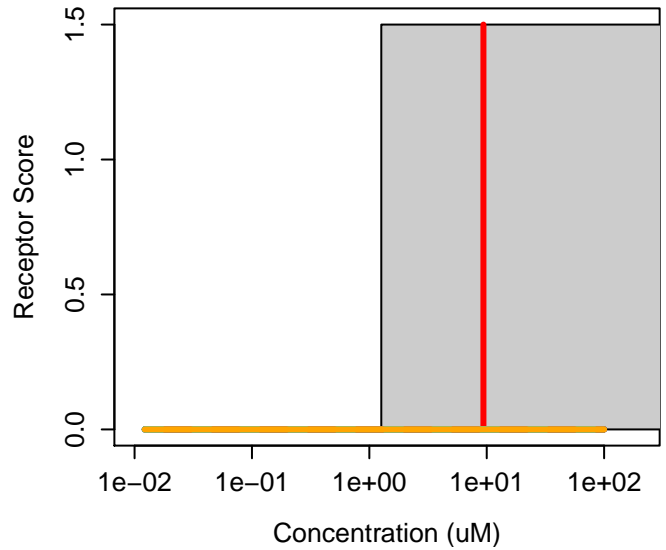

26027-38-3 : Polyoxyethylene(10)nonylphenyl eth

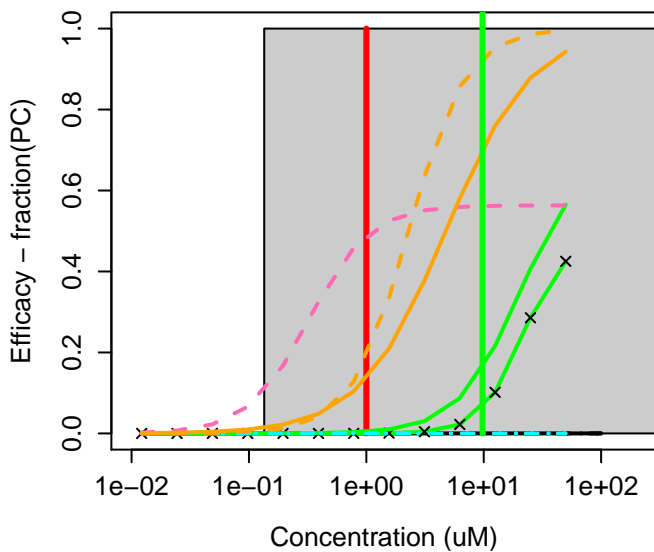

26027-38-3 : Polyoxyethylene(10)nonylphenyl eth  
Agonist: 0 Antagonist: 0.19

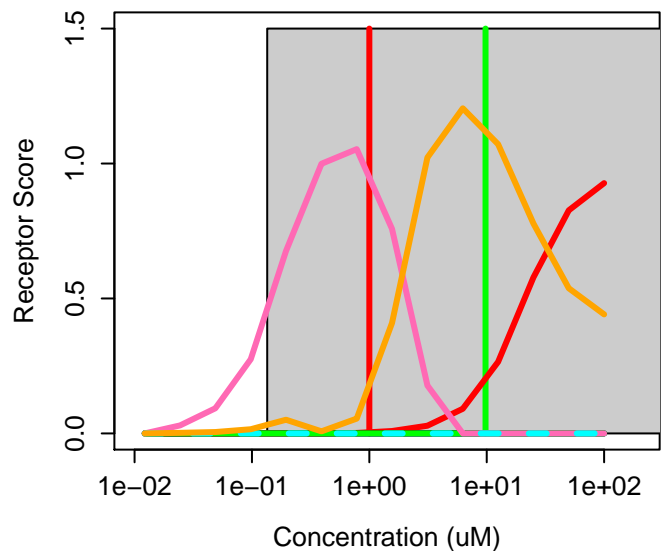

26040-51-7 : Bis(2-ethylhexyl) tetrabromophthala

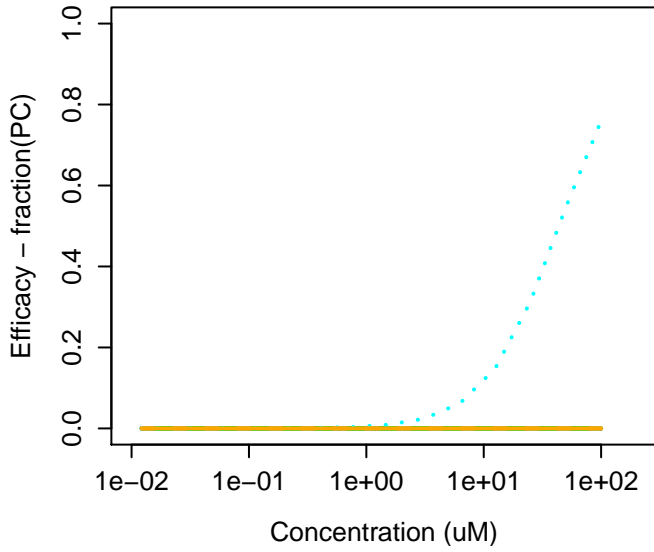

26040-51-7 : Bis(2-ethylhexyl) tetrabromophthala  
Agonist: 0 Antagonist: 0



2605-79-0 : N,N-Dimethyldecylamine oxide

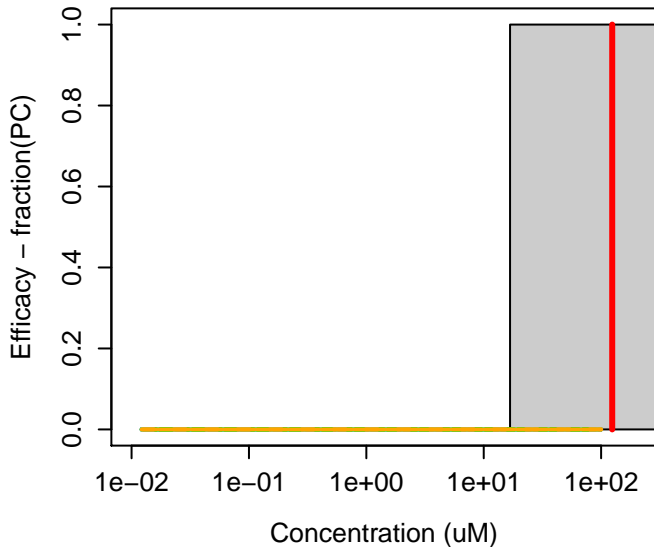

2605-79-0 : N,N-Dimethyldecylamine oxide  
Agonist: 0 Antagonist: 0

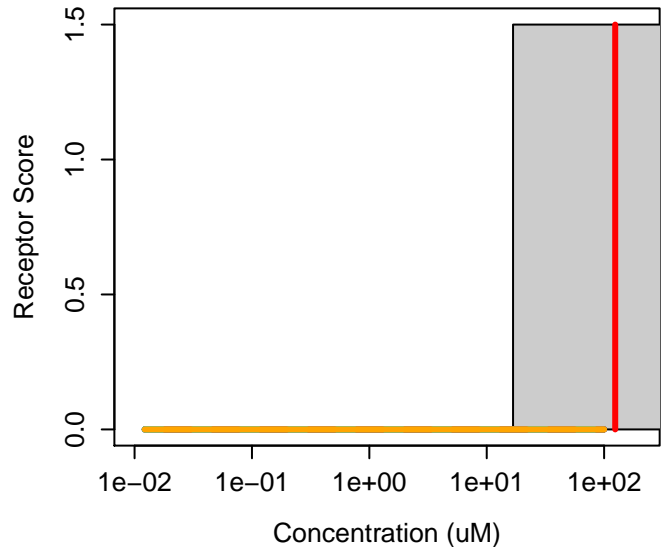

2610-11-9 : C.I. Direct Red 81 disodium salt

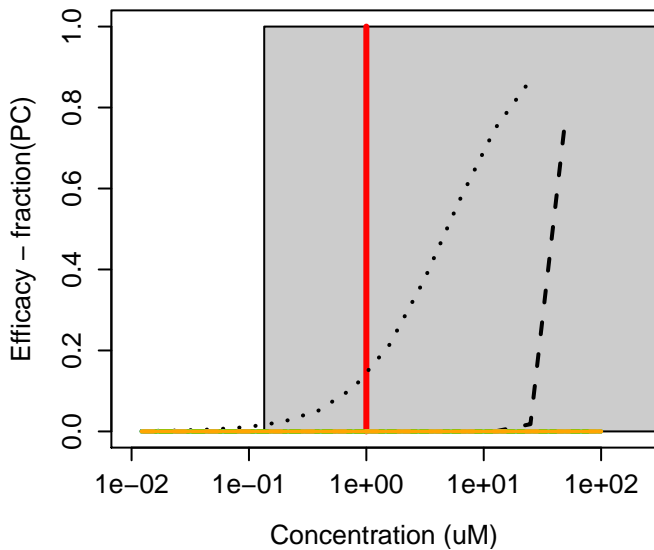

2610-11-9 : C.I. Direct Red 81 disodium salt  
Agonist: 0 Antagonist: 0

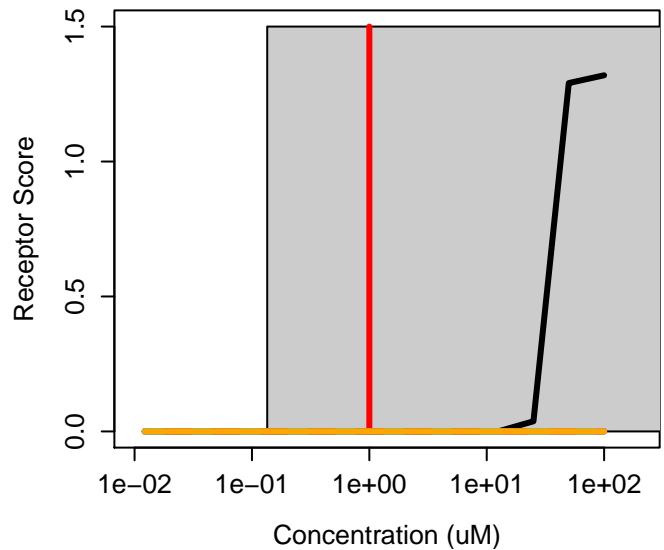

26172-55-4 : 5-Chloro-2-methyl-3(2H)-isothiazolol Agonist: 0 Antagonist: 0

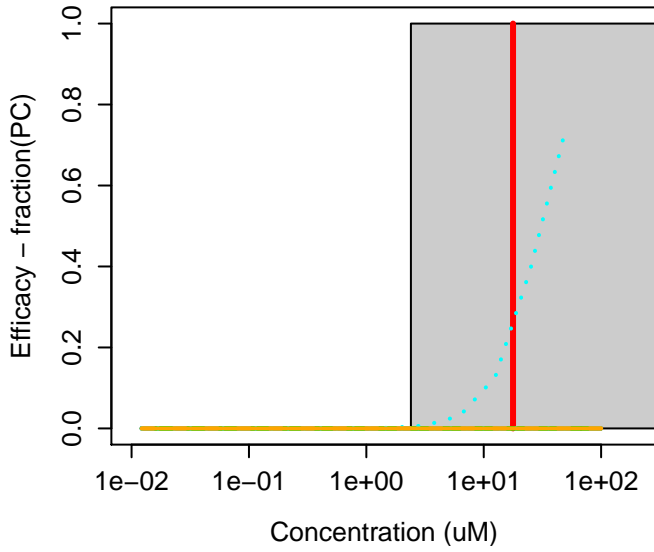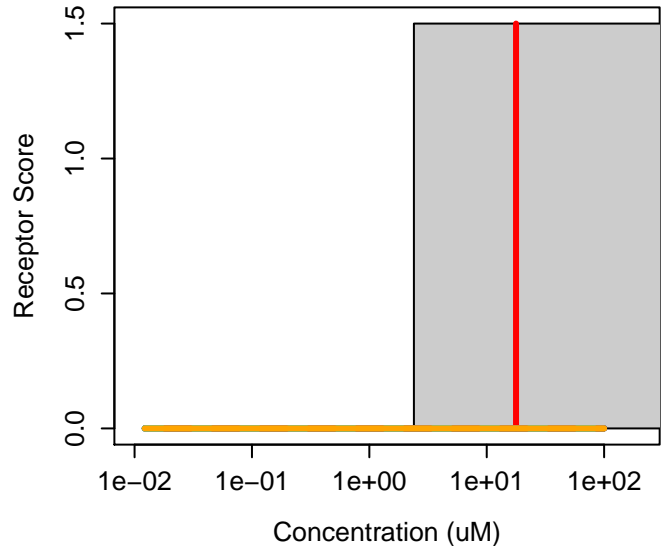

261947-38-0 : CP-532623

261947-38-0 : CP-532623  
Agonist: 0 Antagonist: 0

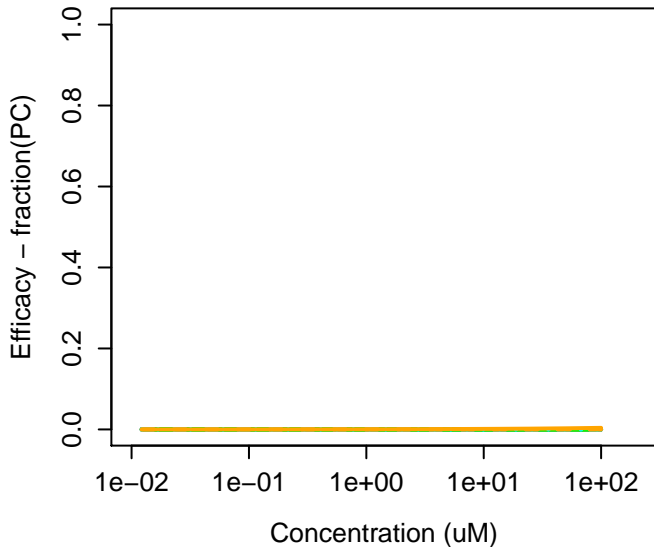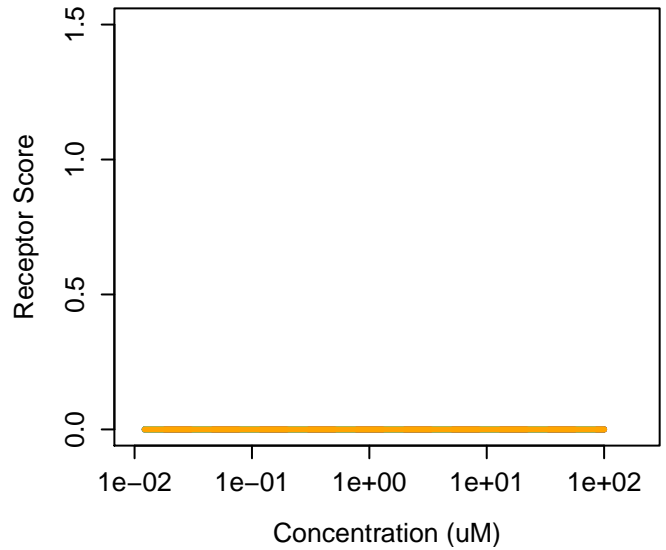

26225-79-6 : Ethofumesate

26225-79-6 : Ethofumesate  
Agonist: 0 Antagonist: 0

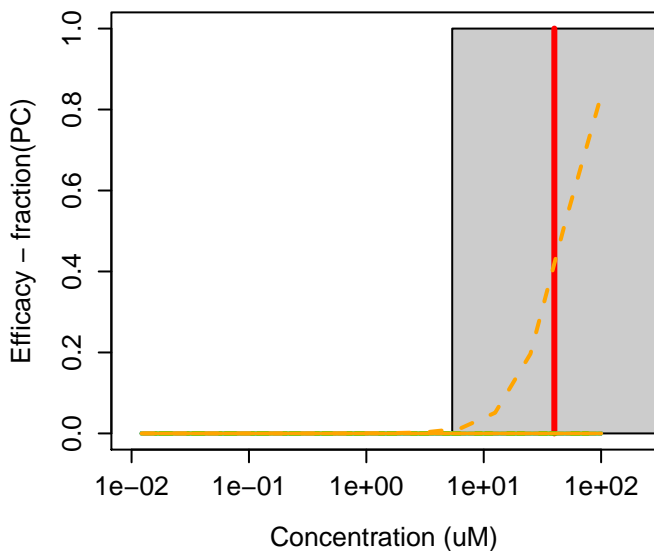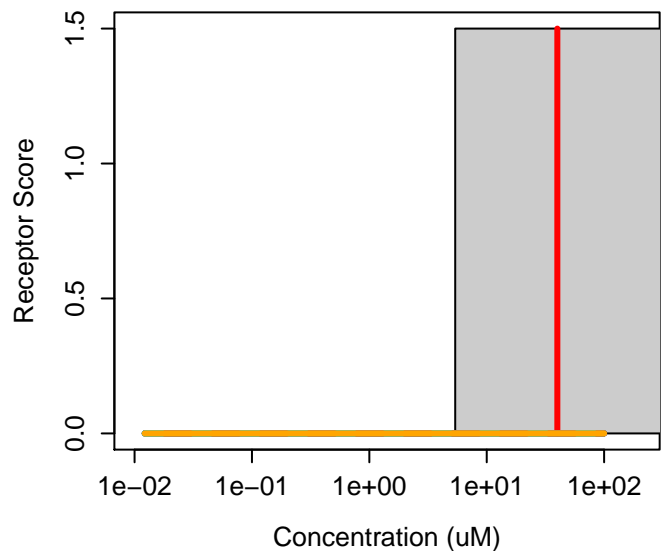

262376-75-0 : HMR1426

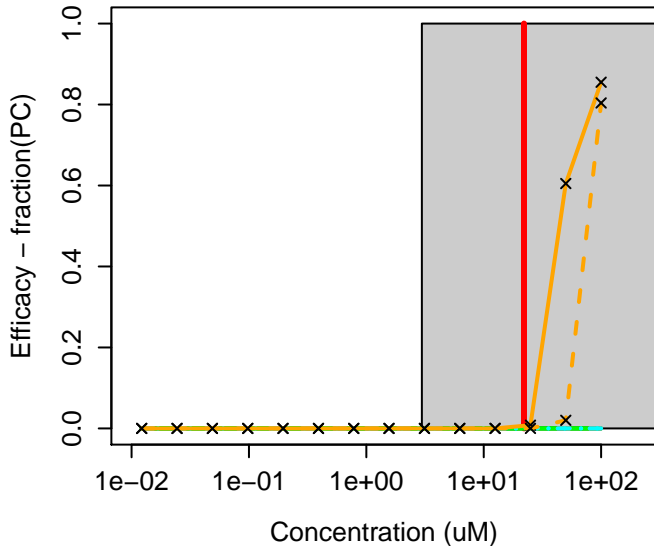

262376-75-0 : HMR1426  
Agonist: 0 Antagonist: 0

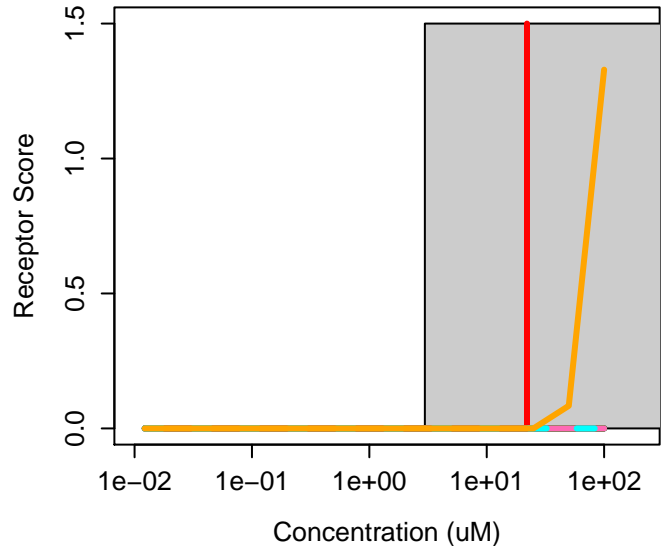

26264-06-2 : Calcium dodecylbenzene sulfonate

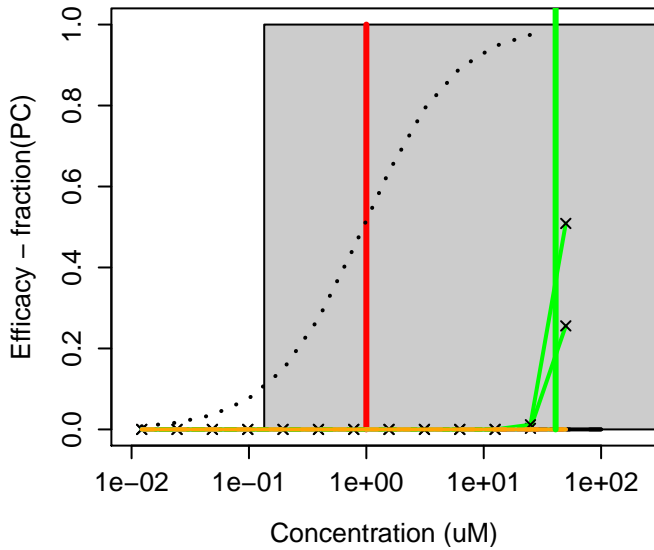

26264-06-2 : Calcium dodecylbenzene sulfonate  
Agonist: 0.033 Antagonist: 0.067

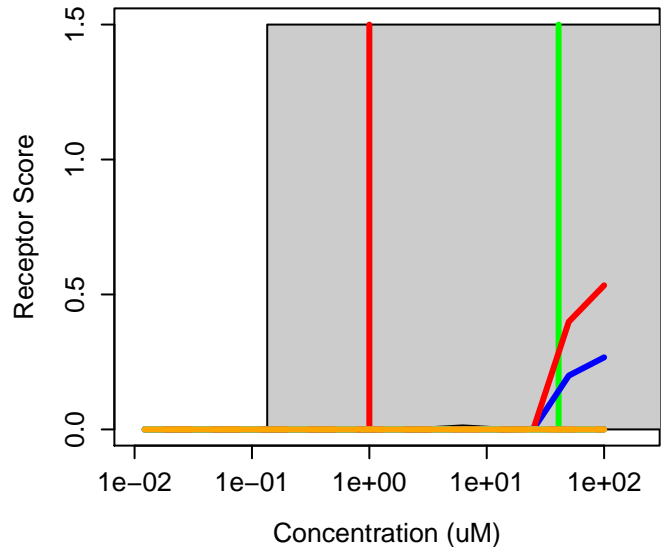

2627-95-4 : 1,3-Divinyl-1,1,3,3-tetramethyl disilox.

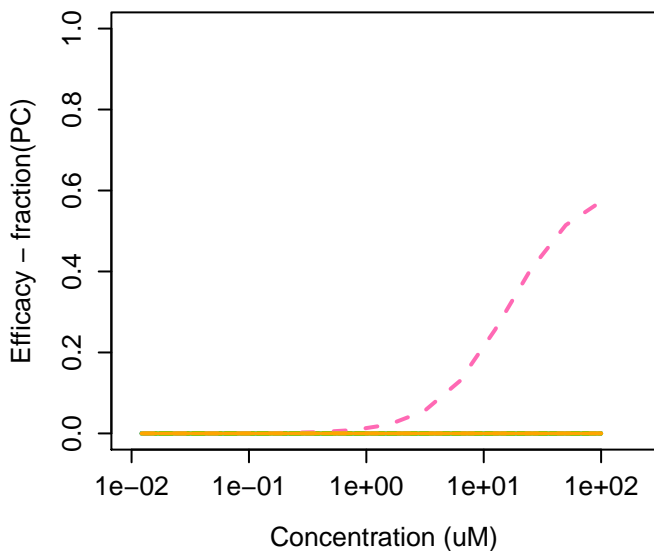

2627-95-4 : 1,3-Divinyl-1,1,3,3-tetramethyl disilox.  
Agonist: 0 Antagonist: 0

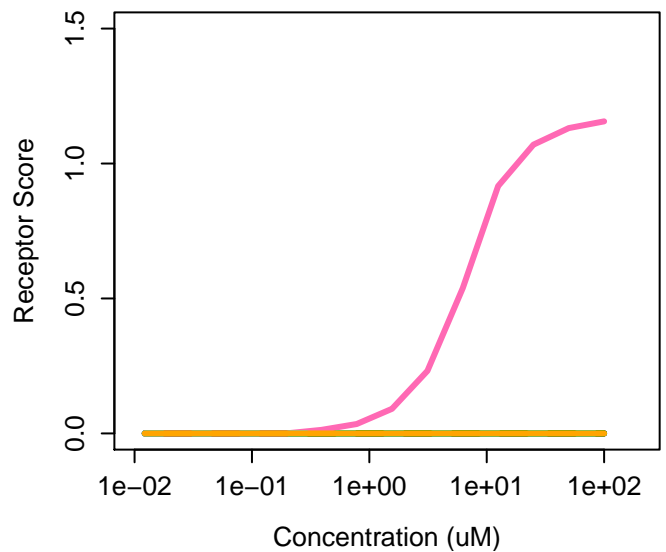

2634-33-5 : 1,2-Benzisothiazolin-3-one

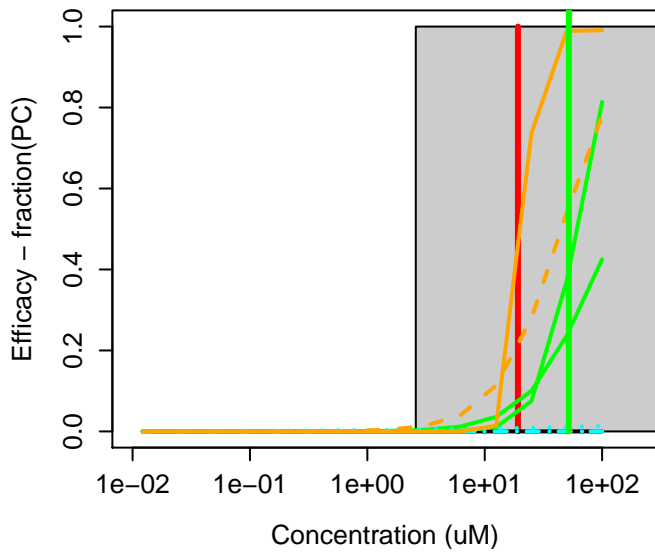

2634-33-5 : 1,2-Benzisothiazolin-3-one  
Agonist: 0 Antagonist: 0.12

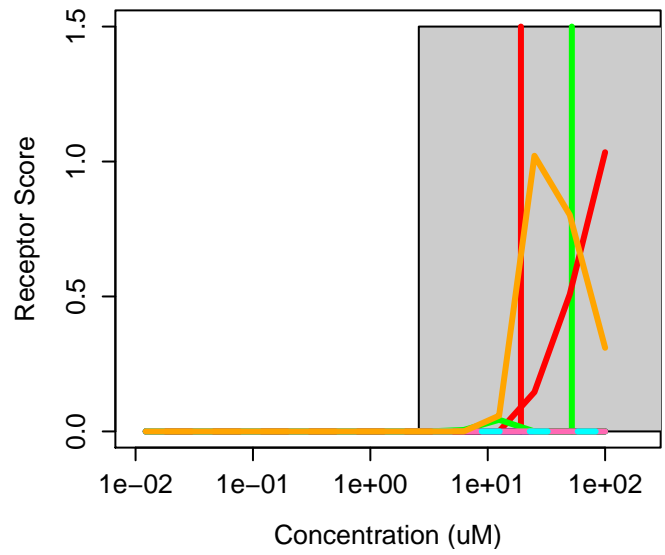

263553-33-9 : GW473178E methyl benzene sulphonate 263553-33-9 : GW473178E methyl benzene sulphonate  
Agonist: 0 Antagonist: 0

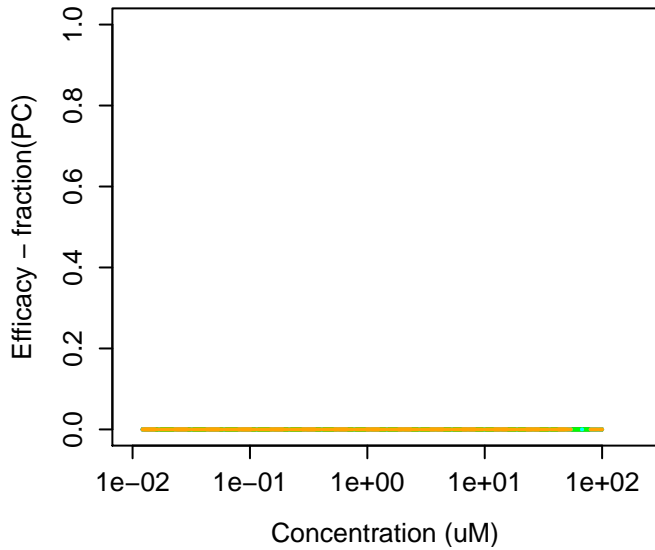

26402-26-6 : Glycerol monooleate



26402-26-6 : Glycerol monooleate  
Agonist: 0 Antagonist: 0



26447-10-9 : Ammonium xylene sulfonate



26447-10-9 : Ammonium xylene sulfonate  
Agonist: 0 Antagonist: 0



264618-44-2 : SSR146977

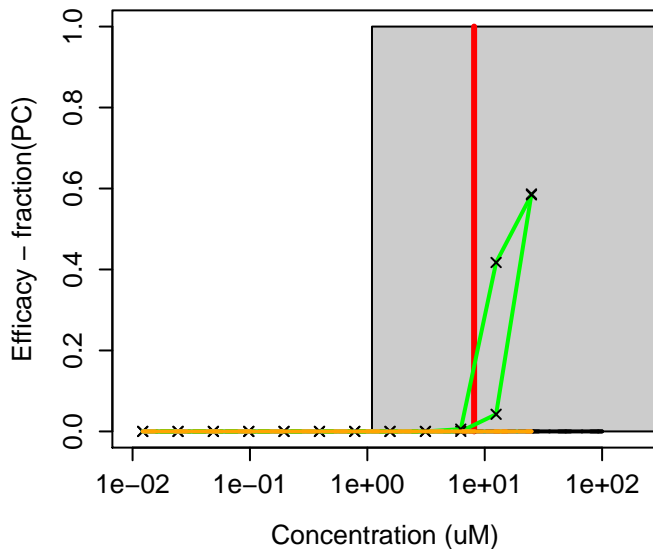

264618-44-2 : SSR146977  
Agonist: 0 Antagonist: 0

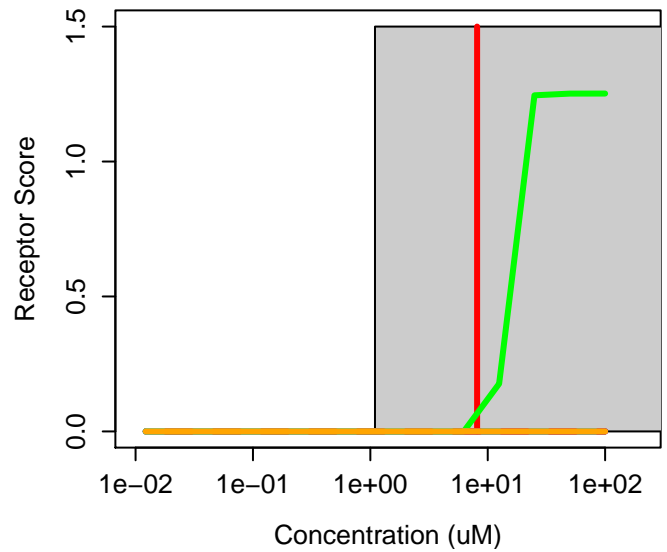

26530-20-1 : Octhilinone

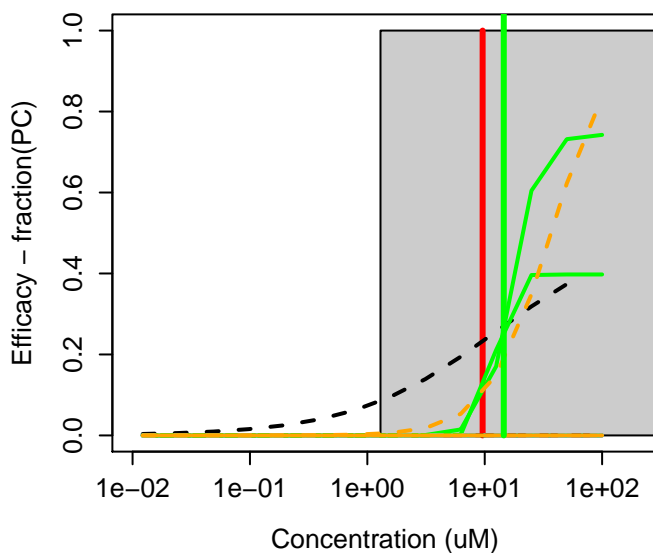

26530-20-1 : Octhilinone  
Agonist: 0 Antagonist: 0.19

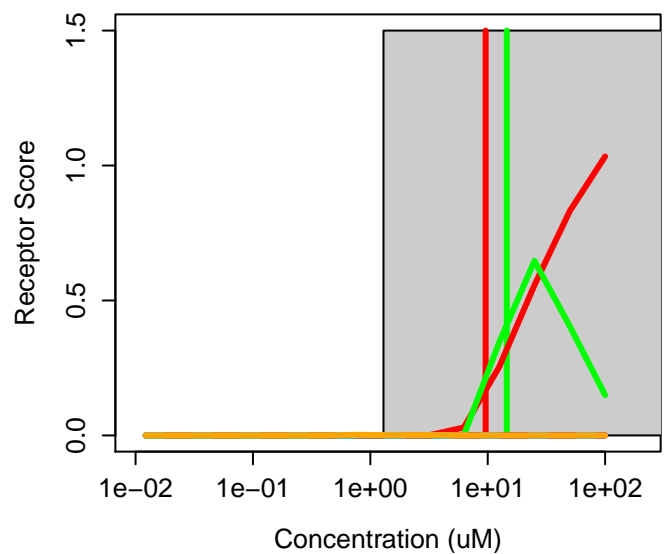

**26628-22-8 : Sodium azide**



**26628-22-8 : Sodium azide**  
**Agonist: 0 Antagonist: 0**



**26644-46-2 : Triforine**

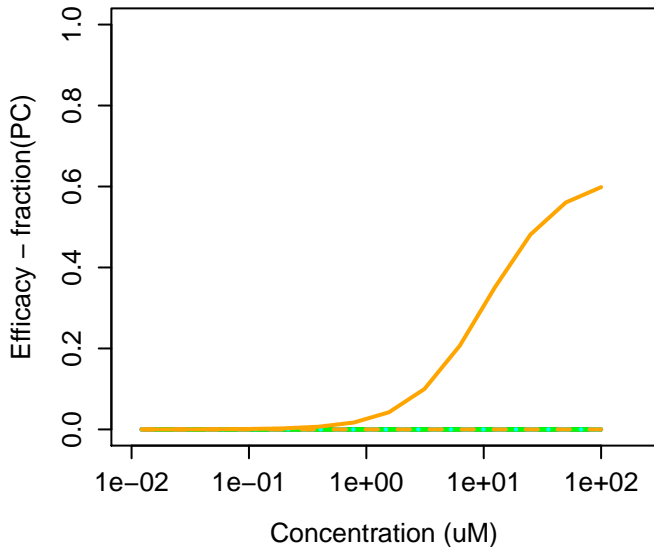

**26644-46-2 : Triforine**  
**Agonist: 0 Antagonist: 0**

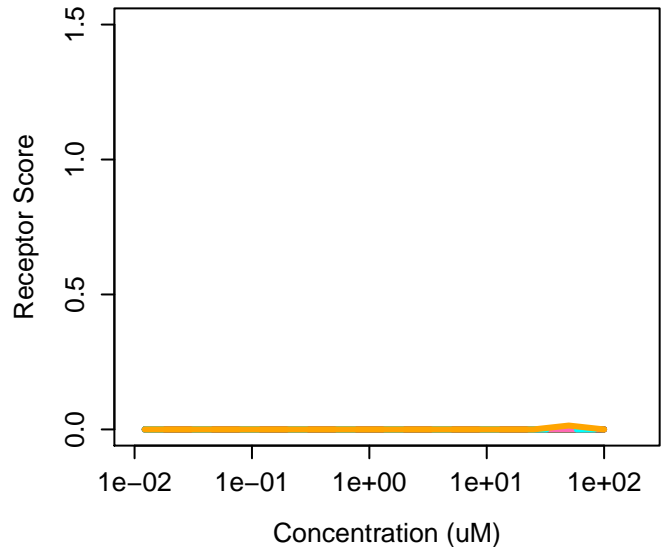

**2675-77-6 : Chloroneb**



**2675-77-6 : Chloroneb**  
**Agonist: 0 Antagonist: 0**



2687-25-4 : 2,3-Diaminotoluene

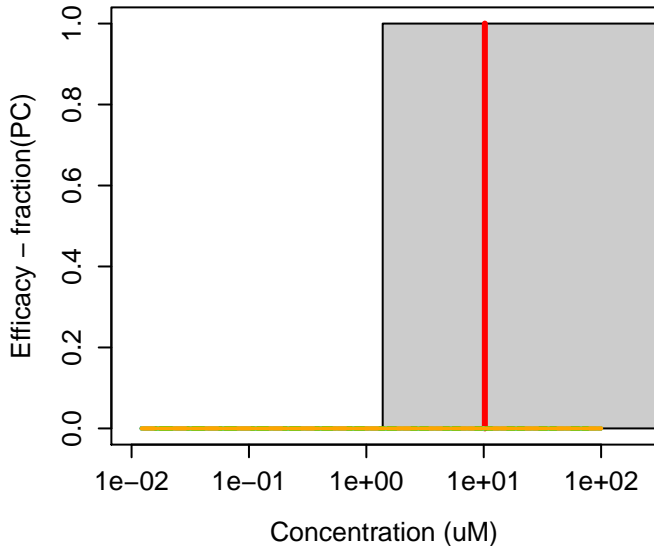

2687-25-4 : 2,3-Diaminotoluene  
Agonist: 0 Antagonist: 0

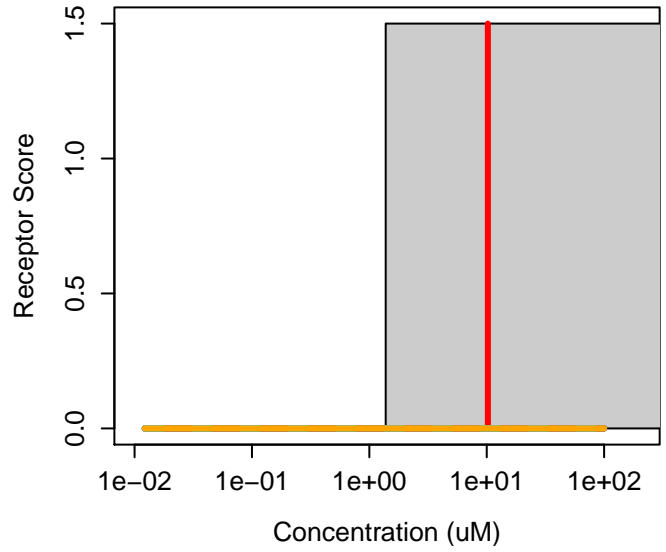

2687-94-7 : N-Octyl-2-pyrrolidone

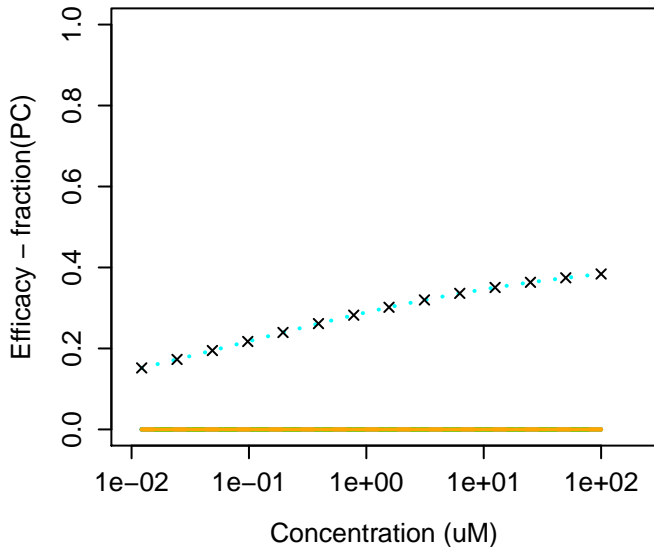

2687-94-7 : N-Octyl-2-pyrrolidone  
Agonist: 0 Antagonist: 0

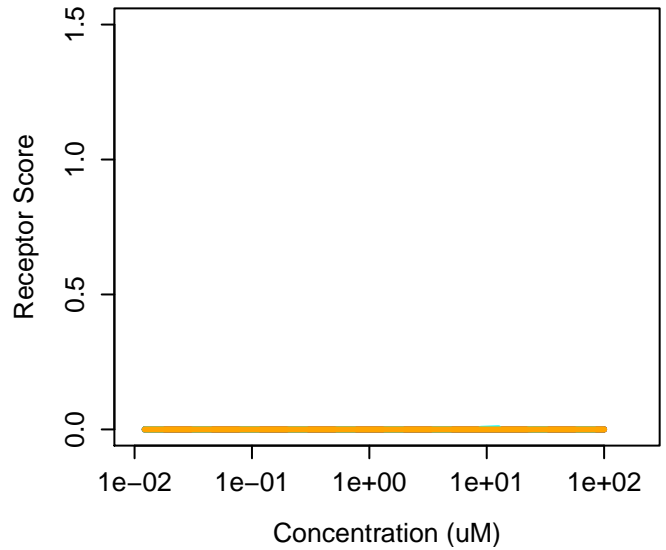

2687-96-9 : 1-Dodecyl-2-pyrrolidinone

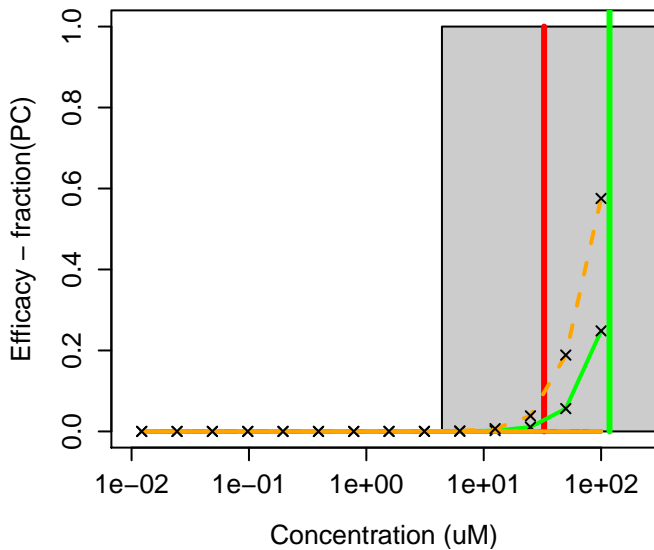

2687-96-9 : 1-Dodecyl-2-pyrrolidinone  
Agonist: 0 Antagonist: 0.013

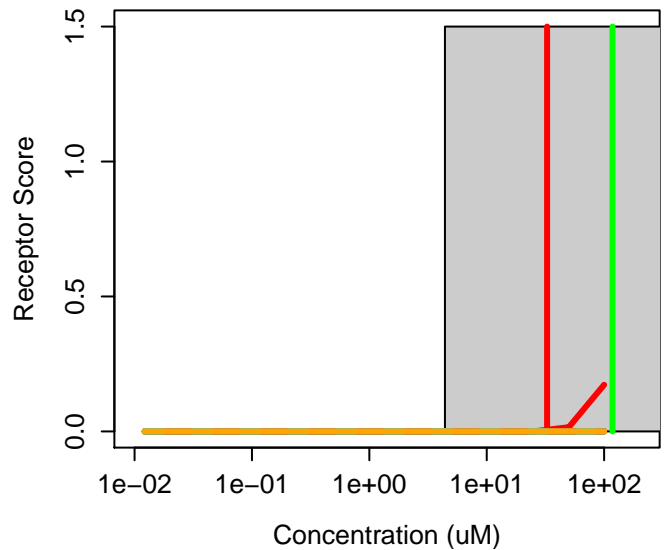



**26896-20-8 : Neodecanoic acid**



**26896-20-8 : Neodecanoic acid  
Agonist: 0 Antagonist: 0**



**2694-54-4 : Triallyl trimellitate**



**2694-54-4 : Triallyl trimellitate  
Agonist: 0 Antagonist: 0**



**2696-84-6 : 4-Propylaniline**



**2696-84-6 : 4-Propylaniline  
Agonist: 0 Antagonist: 0**



2702-72-9 : 2,4-D sodium salt



2702-72-9 : 2,4-D sodium salt  
Agonist: 0 Antagonist: 0



27090-63-7 : N,N,N',N'-Tetrabutyl-1,6-hexanediam



27090-63-7 : N,N,N',N'-Tetrabutyl-1,6-hexanediam  
Agonist: 0 Antagonist: 0



27138-31-4 : Di(propylene glycol) dibenzoate

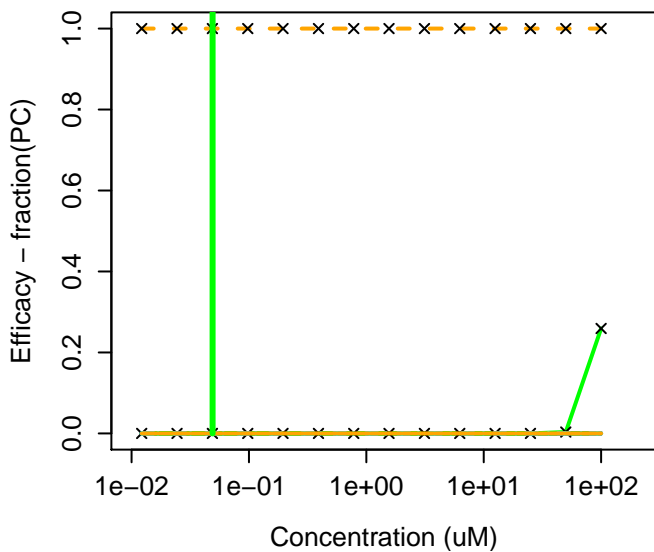

27138-31-4 : Di(propylene glycol) dibenzoate  
Agonist: 0 Antagonist: 0.013

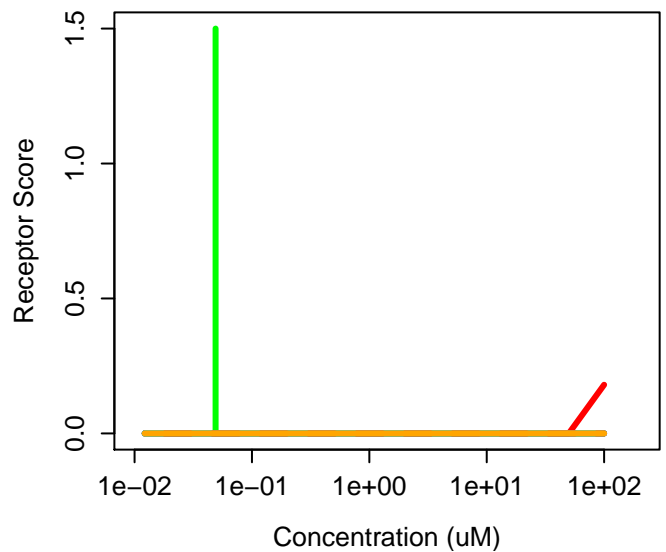

27176-87-0 : Dodecylbenzenesulfonic acid

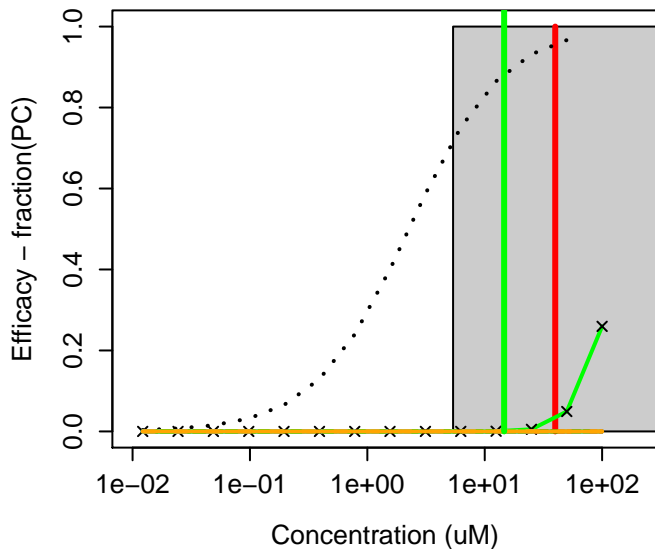

27176-87-0 : Dodecylbenzenesulfonic acid  
Agonist: 0.006 Antagonist: 0.011

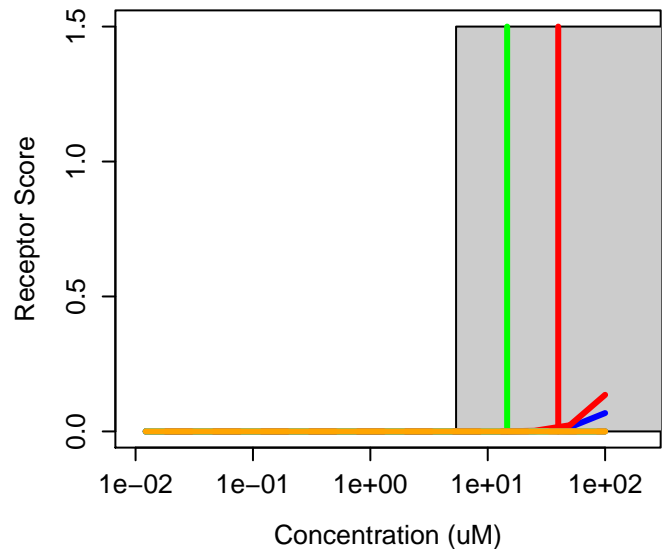

27178-16-1 : Diisodecyl hexanedioate

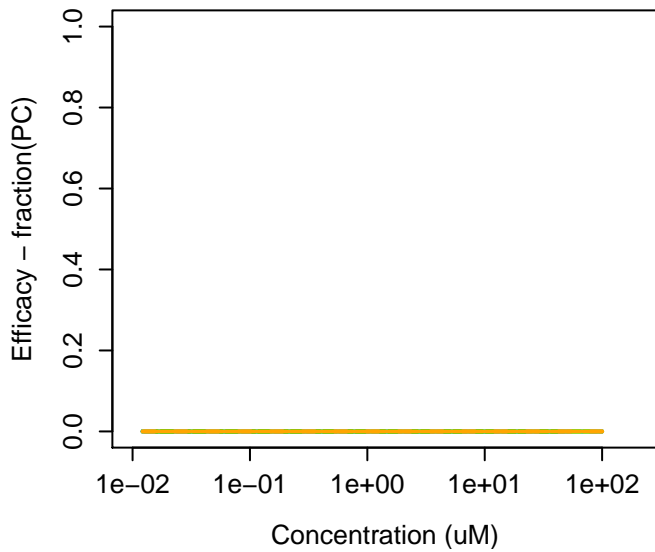

27178-16-1 : Diisodecyl hexanedioate  
Agonist: 0 Antagonist: 0



271-89-6 : 2,3-Benzofuran

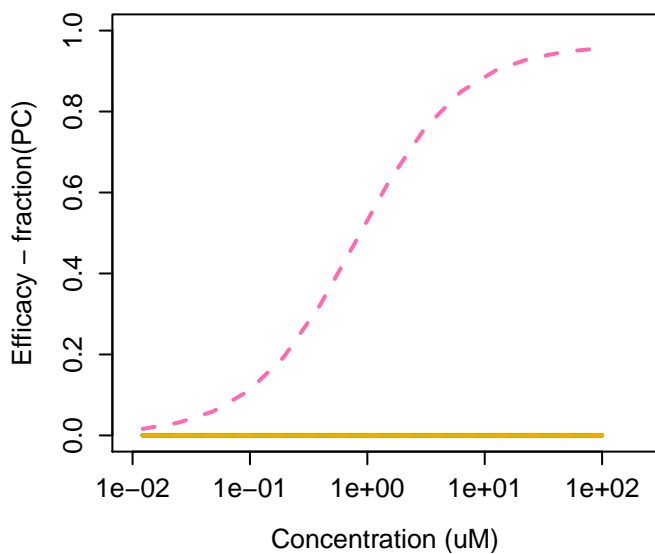

271-89-6 : 2,3-Benzofuran  
Agonist: 0 Antagonist: 0

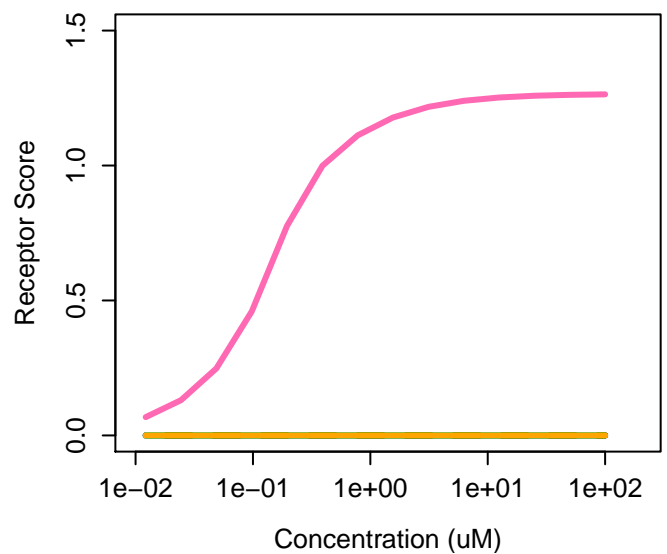

**27193-86-8 : Dodecylphenol**

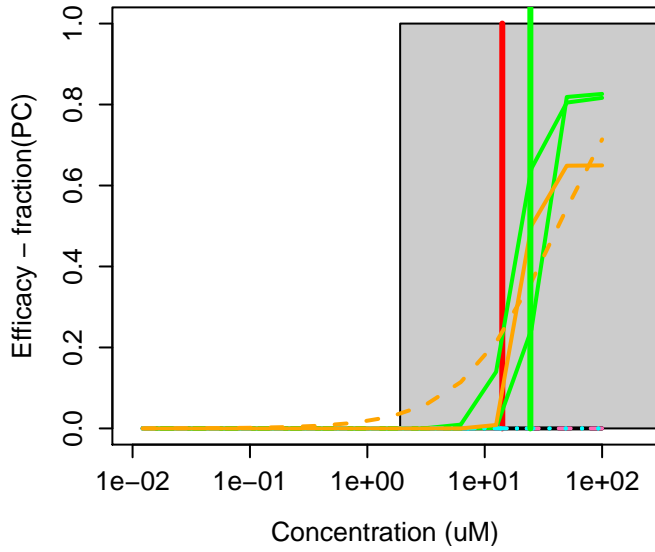

**27193-86-8 : Dodecylphenol  
Agonist: 0 Antagonist: 0.2**

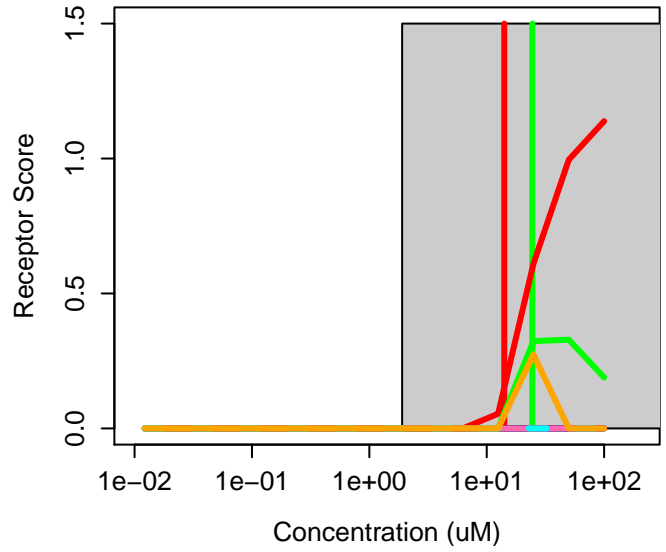

**27253-33-4 : Calcium neodecanoate**



**27253-33-4 : Calcium neodecanoate  
Agonist: 0 Antagonist: 0**



**27306-78-1 : Silwet L77**

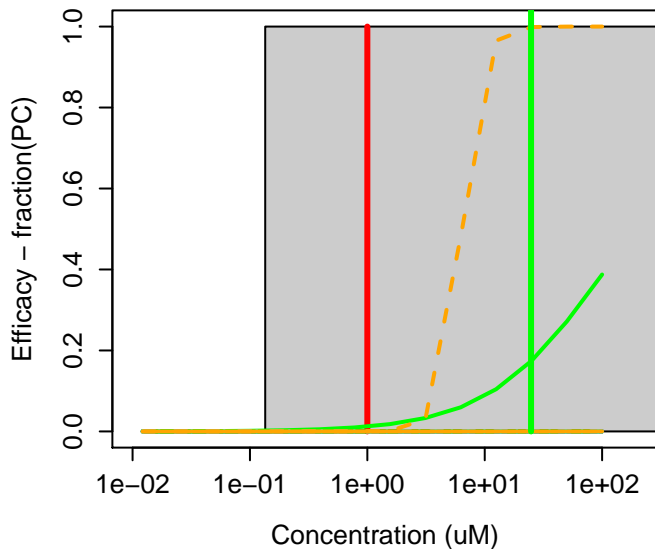

**27306-78-1 : Silwet L77  
Agonist: 0 Antagonist: 0.05**

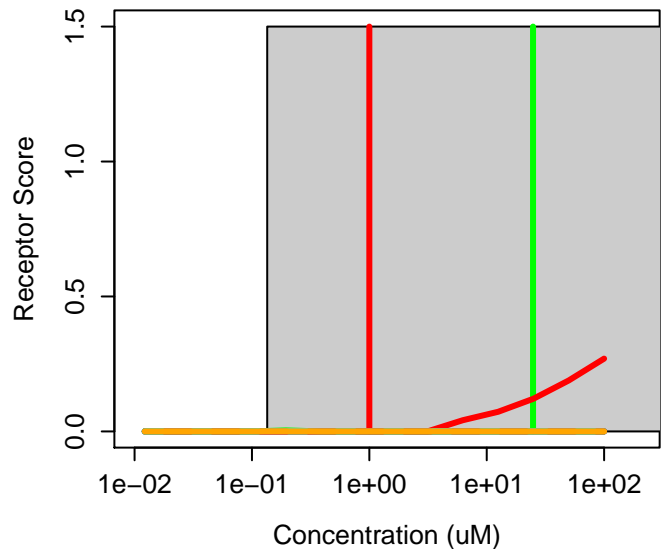

27314-13-2 : Norflurazon

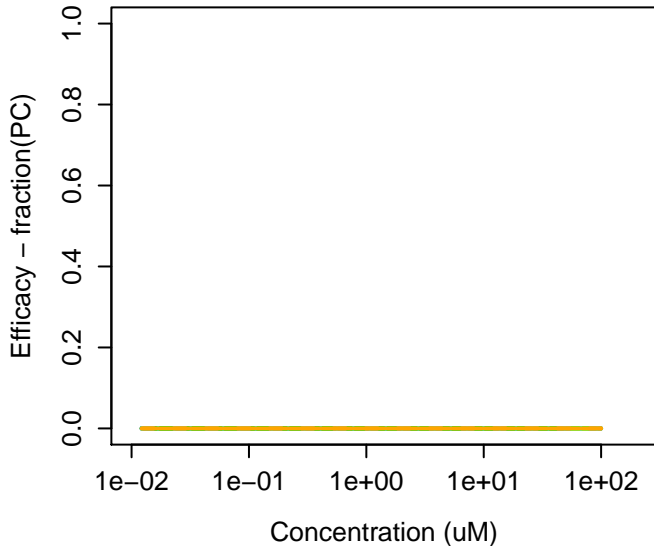

27314-13-2 : Norflurazon  
Agonist: 0 Antagonist: 0



7323-41-7 : Dodecylbenzene sulfonate triethanolami  
7323-41-7 : Dodecylbenzene sulfonate triethanolami  
Agonist: 1.4e-05 Antagonist: 2.5e-05

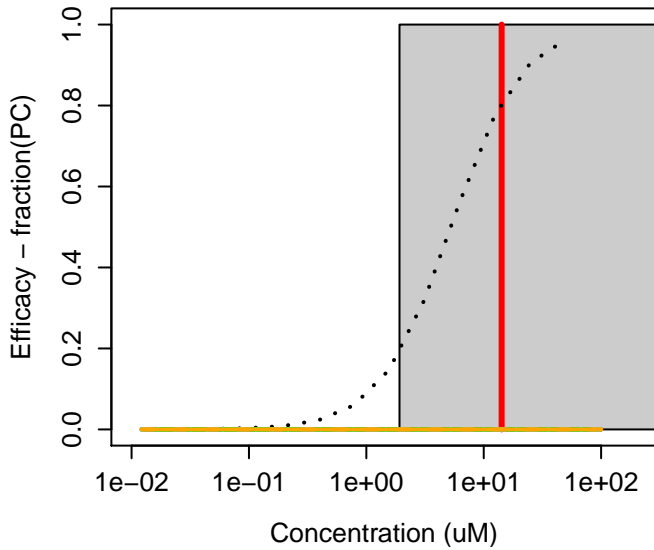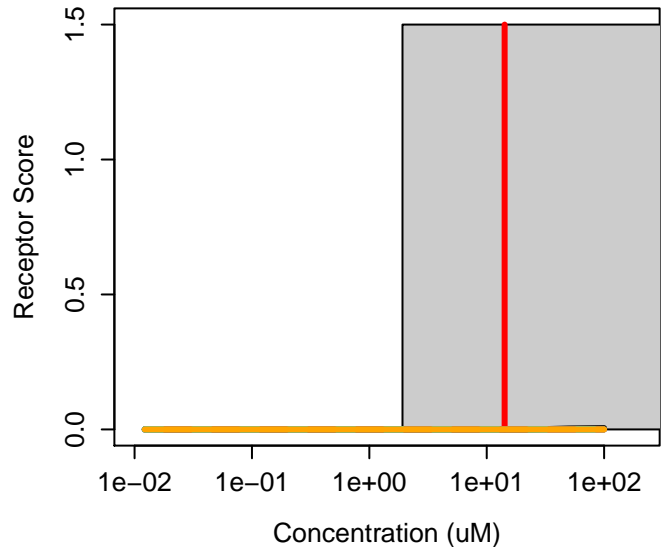

27344-41-8 : Disodium 4,4'-bis(2-sulfostyryl)biphe  
27344-41-8 : Disodium 4,4'-bis(2-sulfostyryl)biphe  
Agonist: 0.086 Antagonist: 0

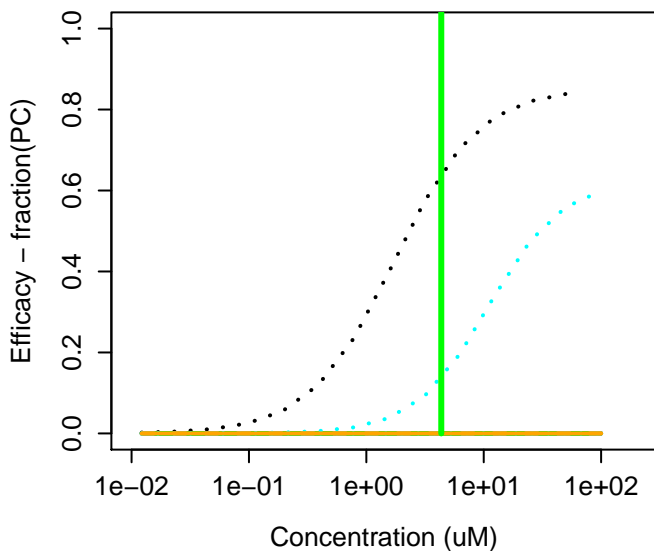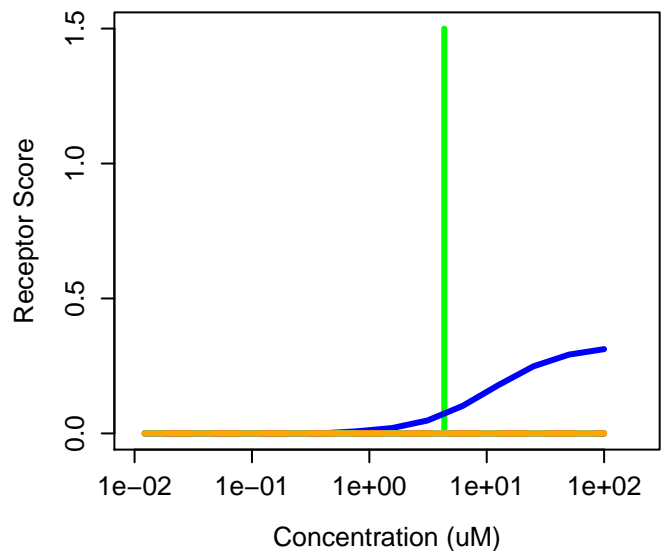

2756-56-1 : Isobornyl propanoate



2756-56-1 : Isobornyl propanoate  
Agonist: 0 Antagonist: 0



2761-24-2 : Triethoxypentylsilane



2761-24-2 : Triethoxypentylsilane  
Agonist: 0 Antagonist: 0



2772-45-4 : 2,4-Bis(1-methyl-1-phenylethyl)pher

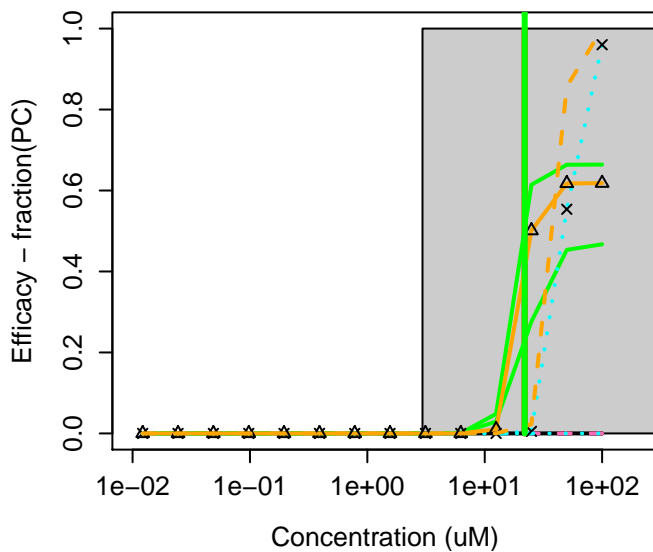

2772-45-4 : 2,4-Bis(1-methyl-1-phenylethyl)pher  
Agonist: 0 Antagonist: 0.16

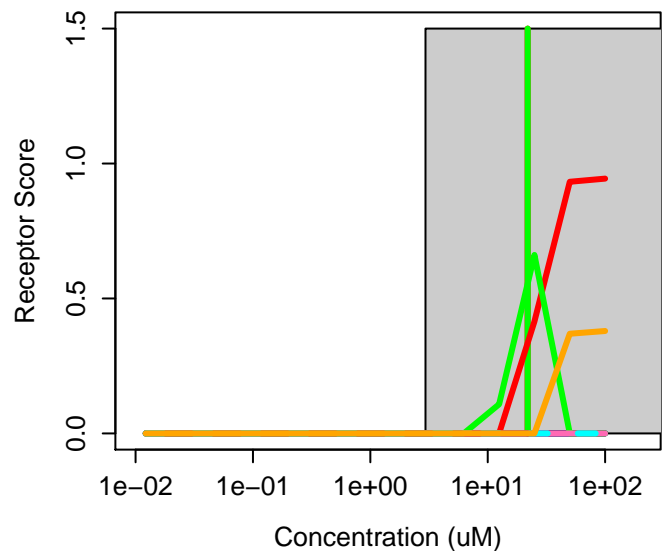

2782-57-2 : Troclocosene



2782-57-2 : Troclocosene  
Agonist: 0 Antagonist: 0



2783-94-0 : FD&C Yellow 6

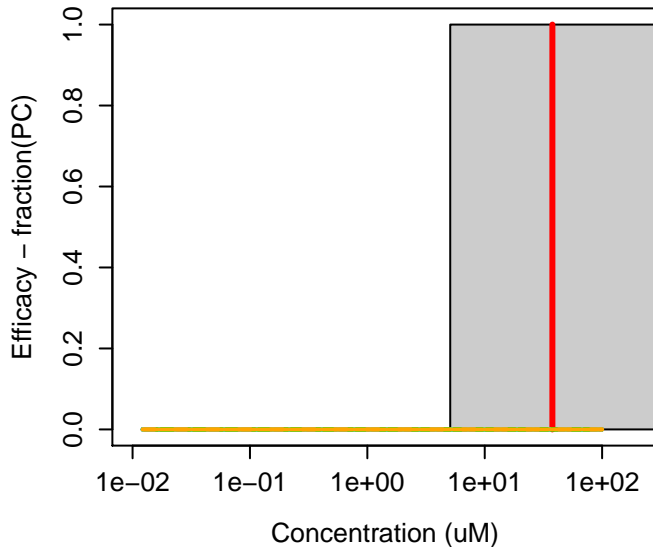

2783-94-0 : FD&C Yellow 6  
Agonist: 0 Antagonist: 0

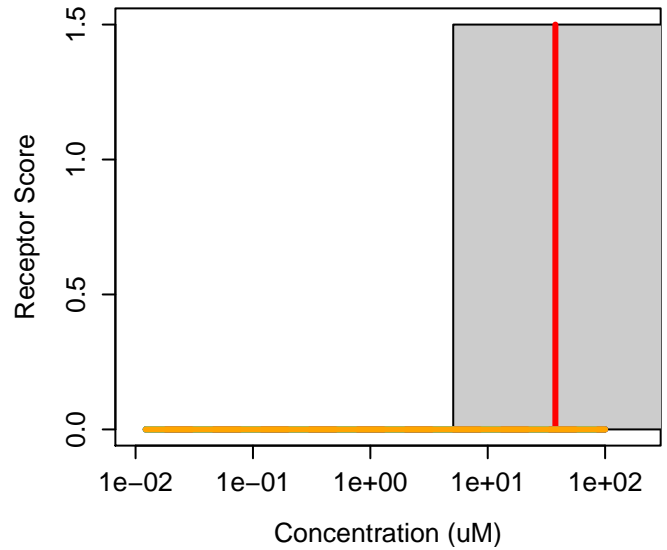

2795-39-3 : PFOS-K

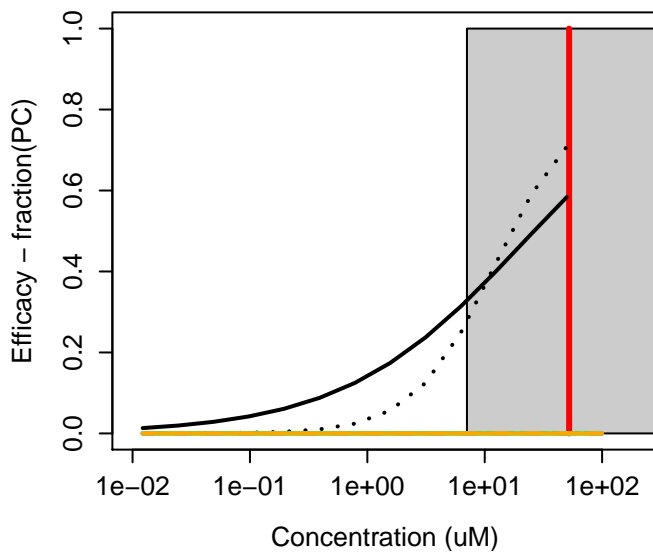

2795-39-3 : PFOS-K  
Agonist: 9.6e-05 Antagonist: 2e-04

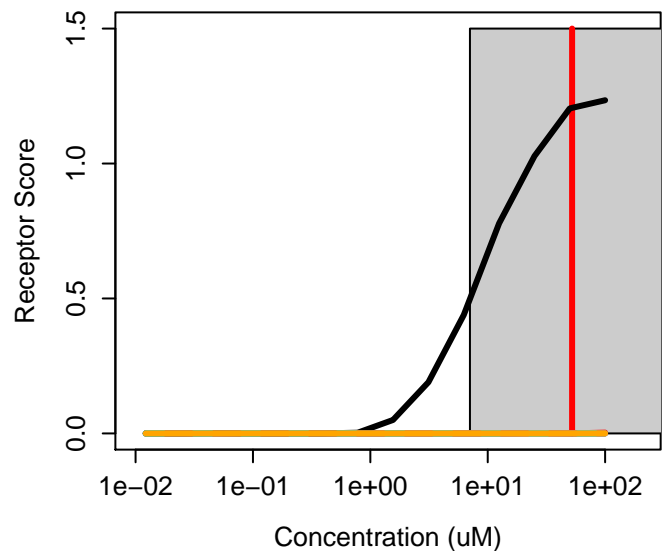

27955-94-8 : 4,4',4''-Ethane-1,1,1-triyltriphenol

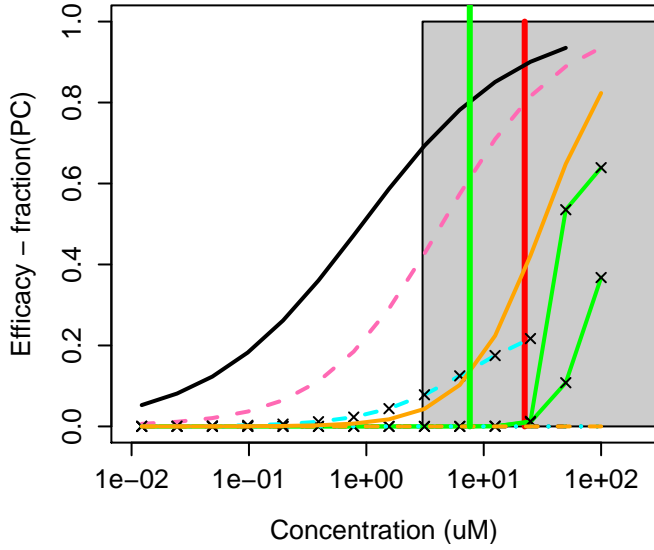

27955-94-8 : 4,4',4''-Ethane-1,1,1-triyltriphenol  
Agonist: 0.24 Antagonist: 0.075

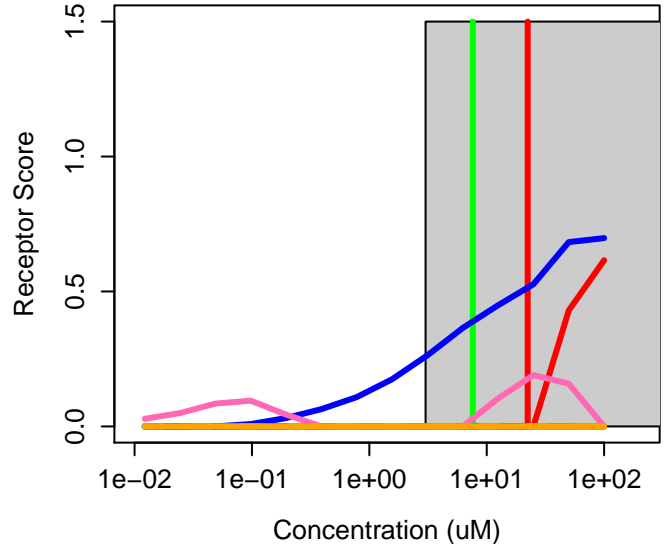

2807-30-9 : 2-Propoxyethanol

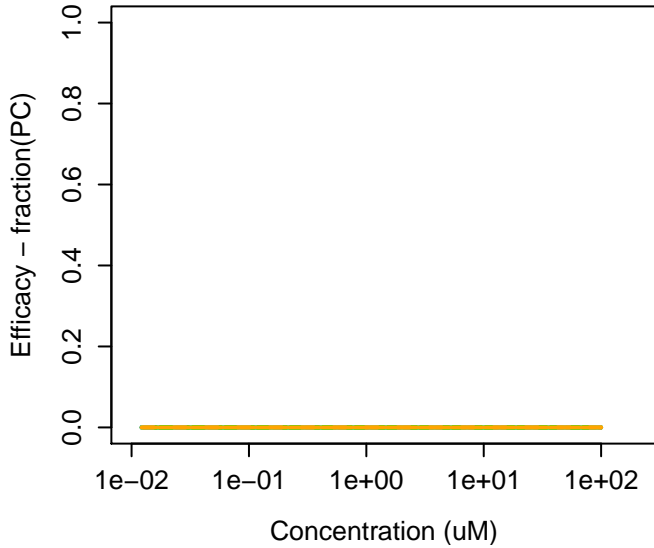

2807-30-9 : 2-Propoxyethanol  
Agonist: 0 Antagonist: 0

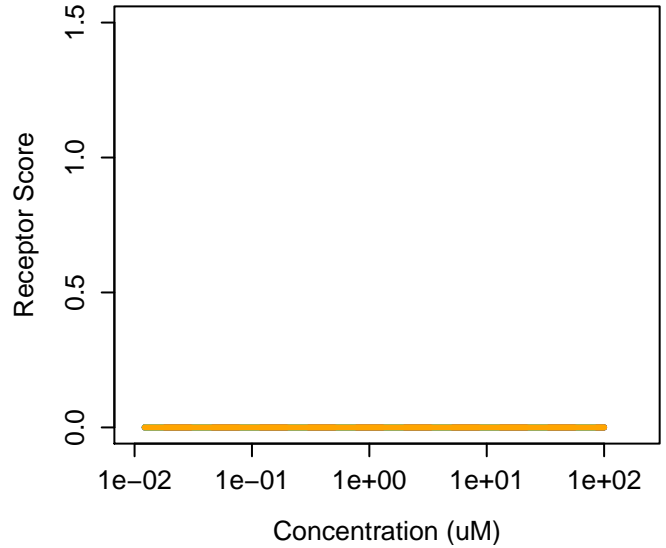

28159-98-0 : Cybutryne

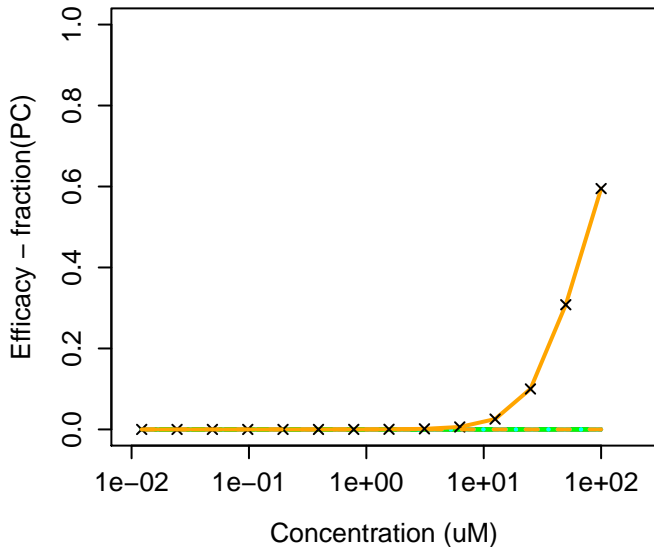

28159-98-0 : Cybutryne  
Agonist: 0 Antagonist: 0

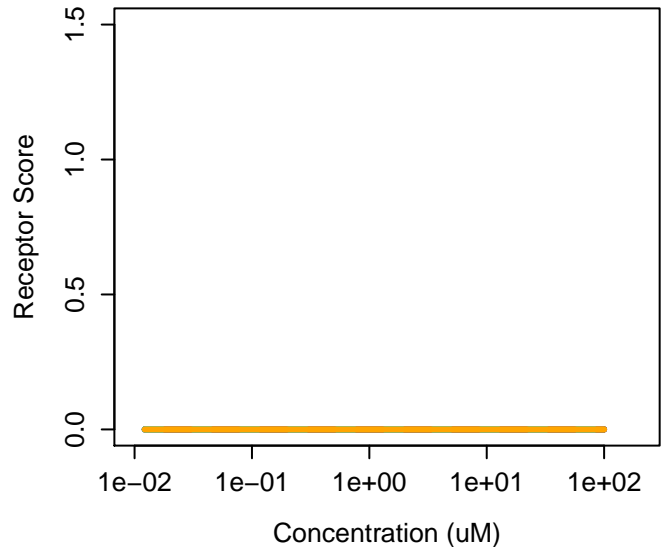



**28249-77-6 : Thiobencarb**

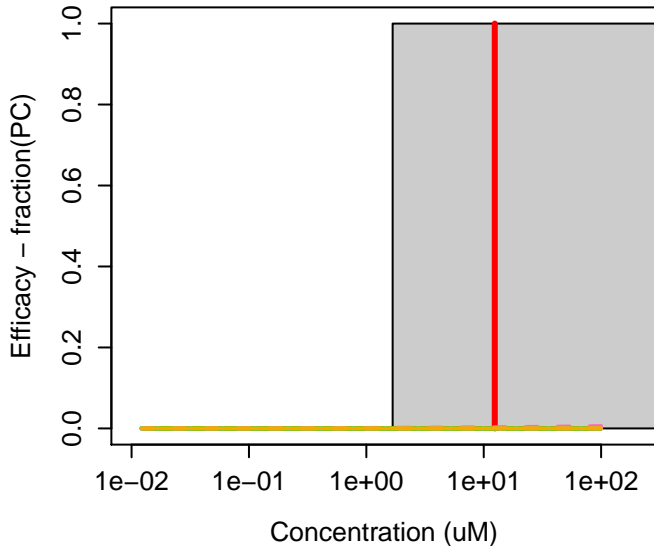

**28249-77-6 : Thiobencarb  
Agonist: 0 Antagonist: 0**

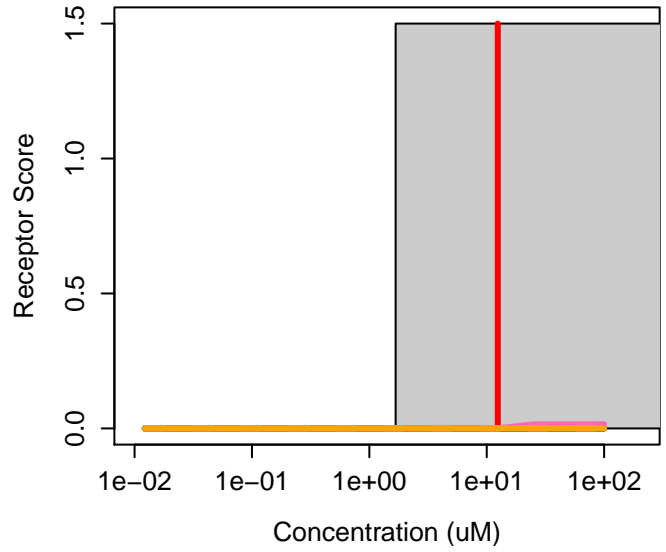

**283594-90-1 : Spiromesifen**



**283594-90-1 : Spiromesifen  
Agonist: 0 Antagonist: 0**



**2835-95-2 : 5-Amino-2-methylphenol**

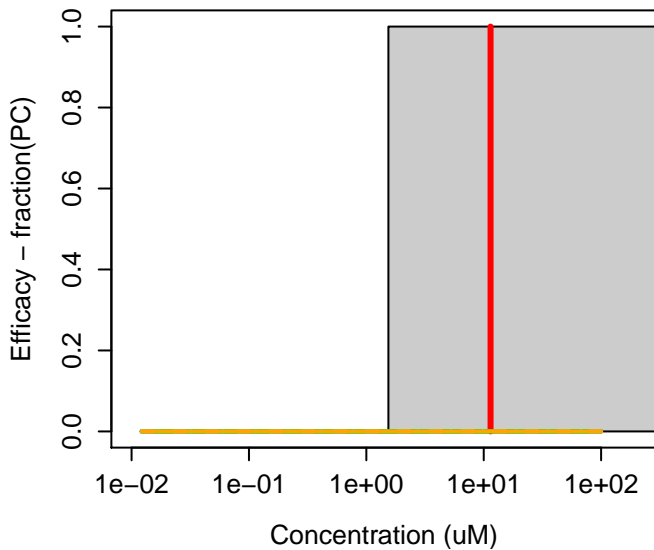

**2835-95-2 : 5-Amino-2-methylphenol  
Agonist: 0 Antagonist: 0**

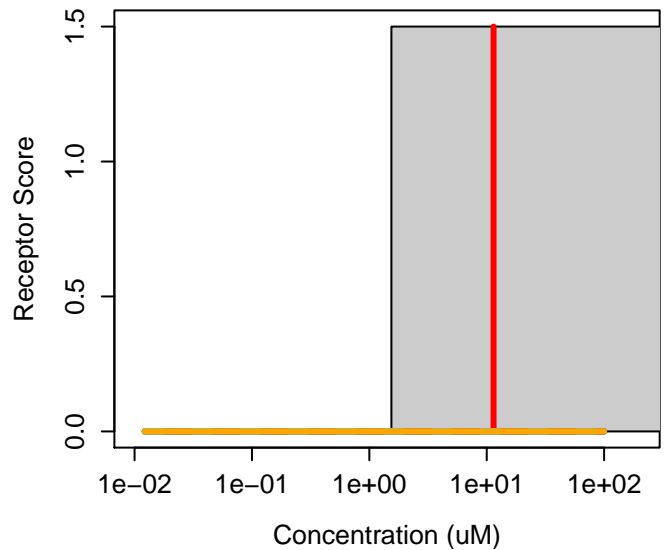

28434-00-6 : S-Bioallethrin

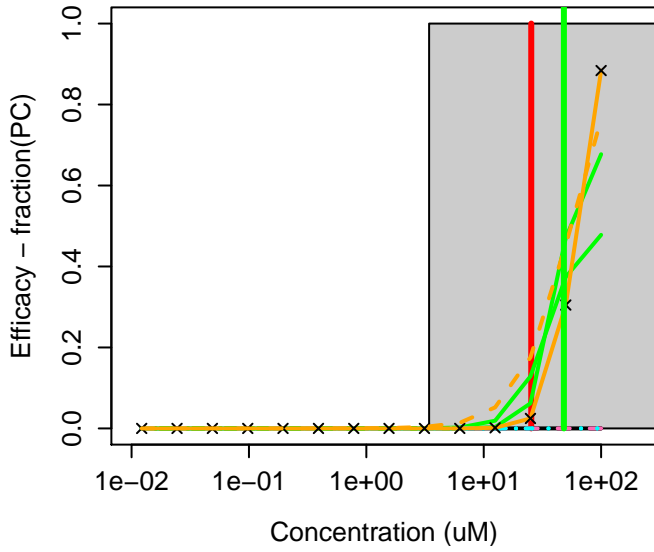

28434-00-6 : S-Bioallethrin  
Agonist: 0 Antagonist: 0.11

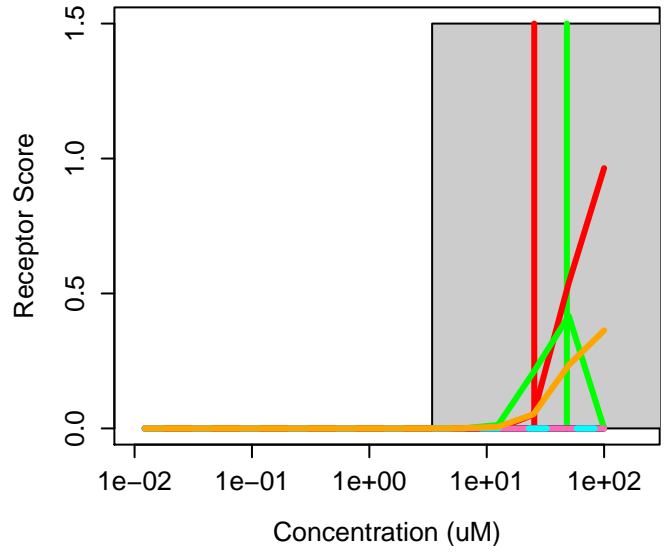

28631-66-5 : C.I. Acid Blue 22

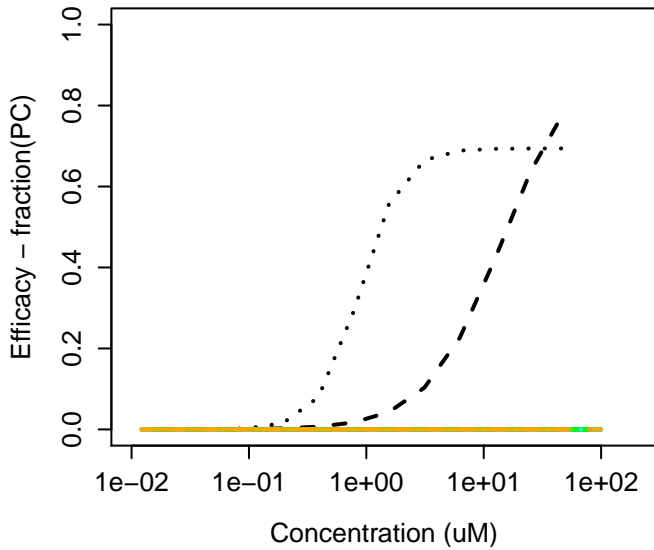

28631-66-5 : C.I. Acid Blue 22  
Agonist: 0 Antagonist: 5.1e-20

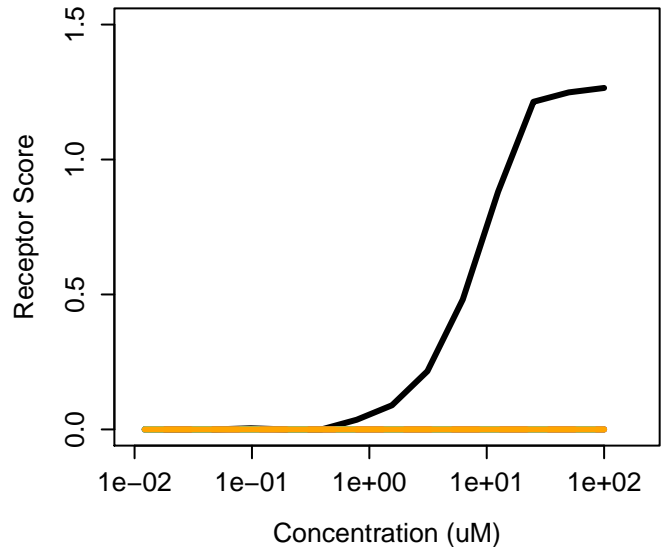

2870-32-8 : C.I. Direct Yellow 12

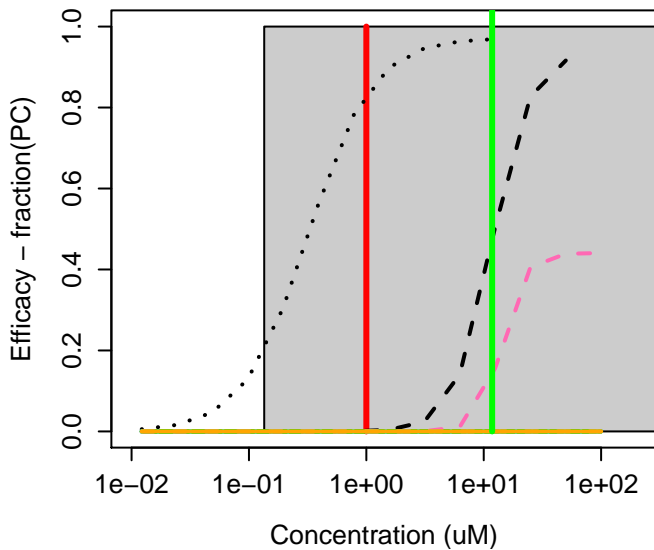

2870-32-8 : C.I. Direct Yellow 12  
Agonist: 0.072 Antagonist: 6.8e-05

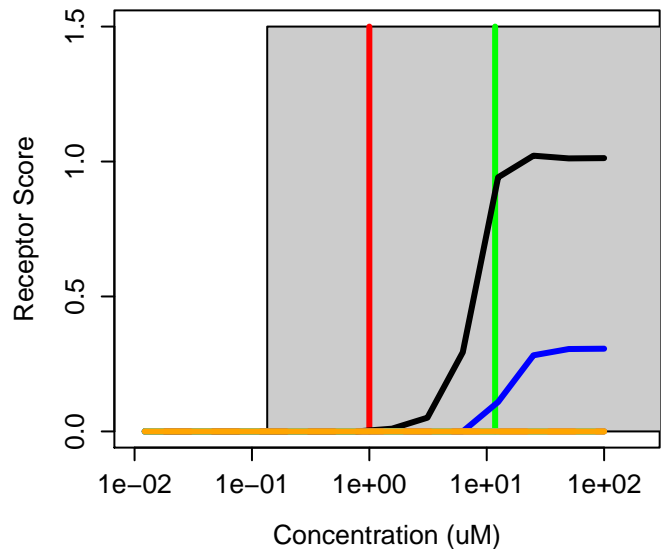

**28804-88-8 : Dimethylnaphthalene**



**28804-88-8 : Dimethylnaphthalene**  
**Agonist: 0 Antagonist: 0**



**288104-79-0 : Surinabant**

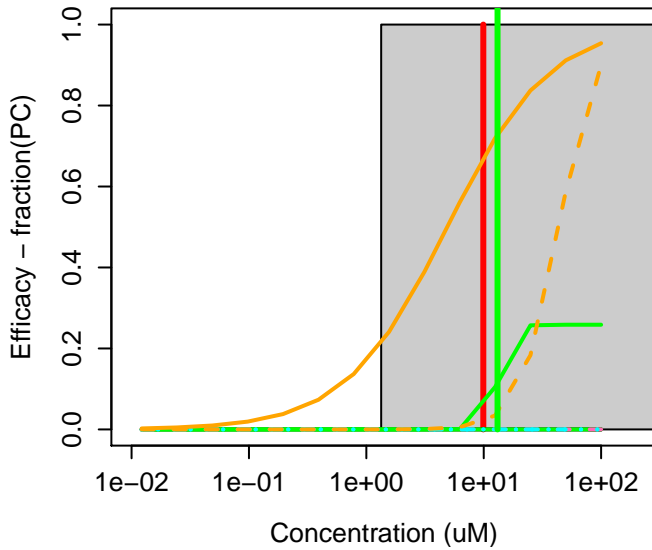

**288104-79-0 : Surinabant**  
**Agonist: 0 Antagonist: 0.052**

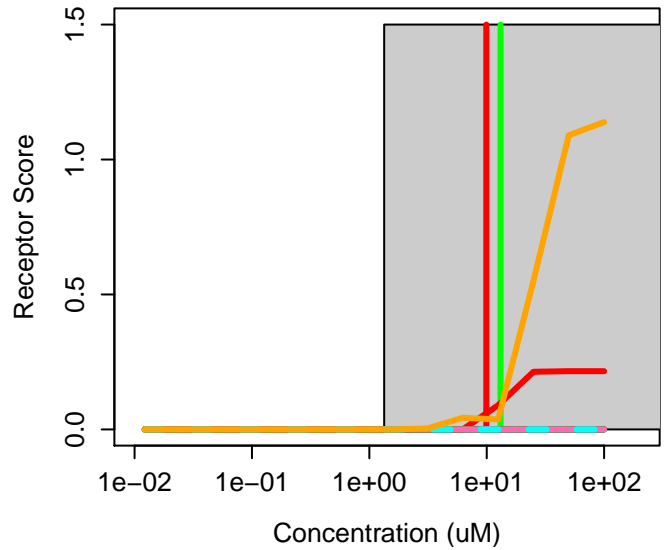

**288-32-4 : Imidazole**



**288-32-4 : Imidazole**  
**Agonist: 0 Antagonist: 0**



288-88-0 : 1H-1,2,4-Triazole

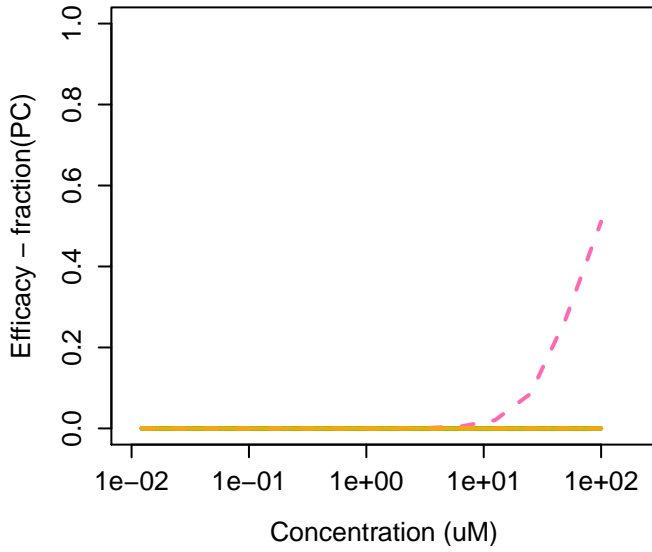

288-88-0 : 1H-1,2,4-Triazole  
Agonist: 0 Antagonist: 0

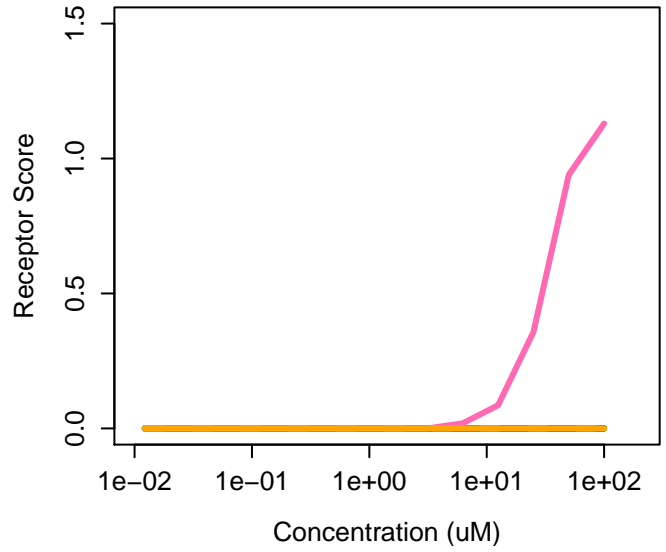

2893-78-9 : Sodium dichloroisocyanurate



2893-78-9 : Sodium dichloroisocyanurate  
Agonist: 0 Antagonist: 0



289716-94-5 : CP-607366

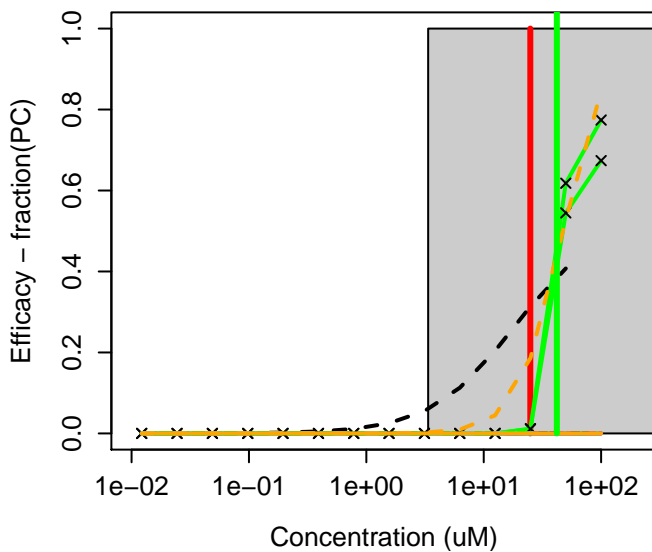

289716-94-5 : CP-607366  
Agonist: 0 Antagonist: 0.14

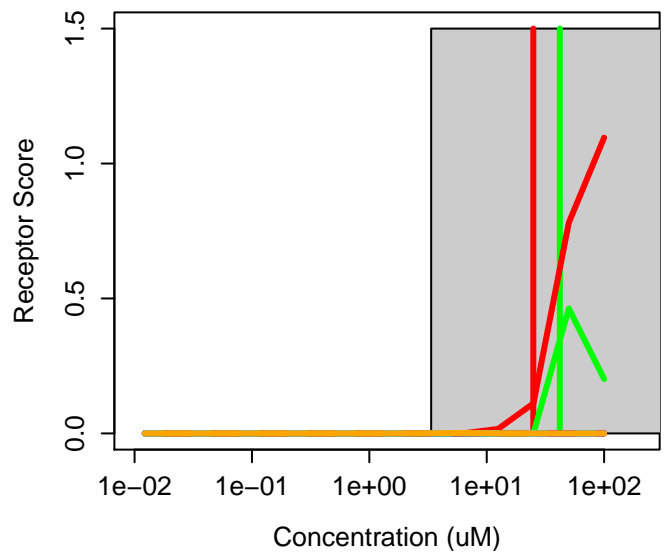

290352-28-2 : CP-634384

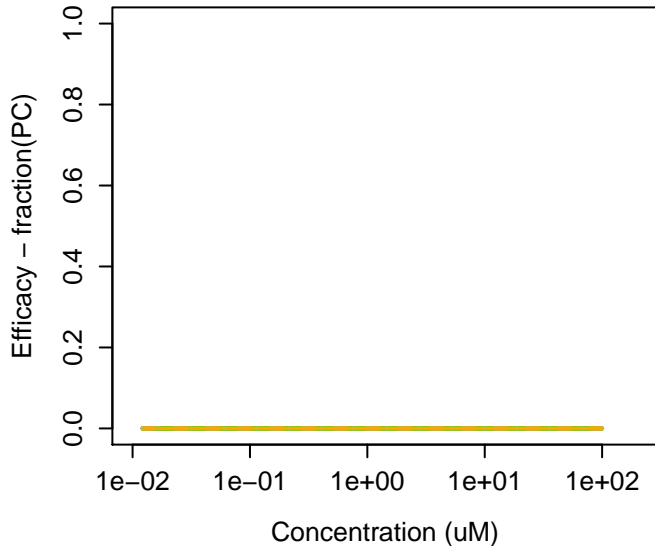

290352-28-2 : CP-634384  
Agonist: 0 Antagonist: 0



29091-21-2 : Prodiamine

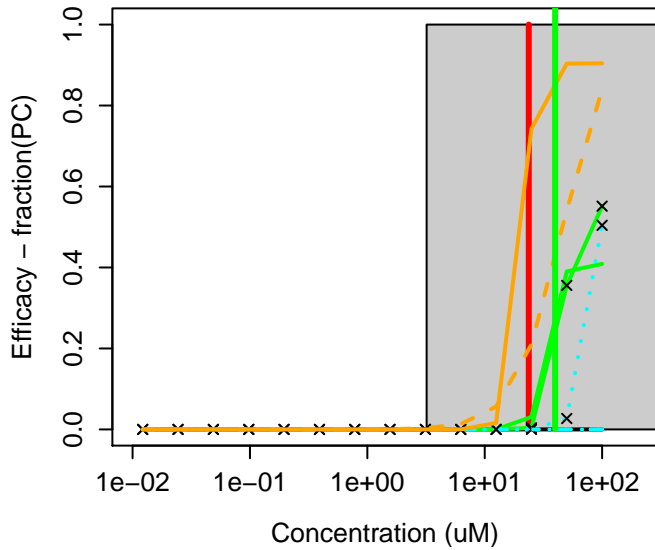

29091-21-2 : Prodiamine  
Agonist: 0 Antagonist: 0.1

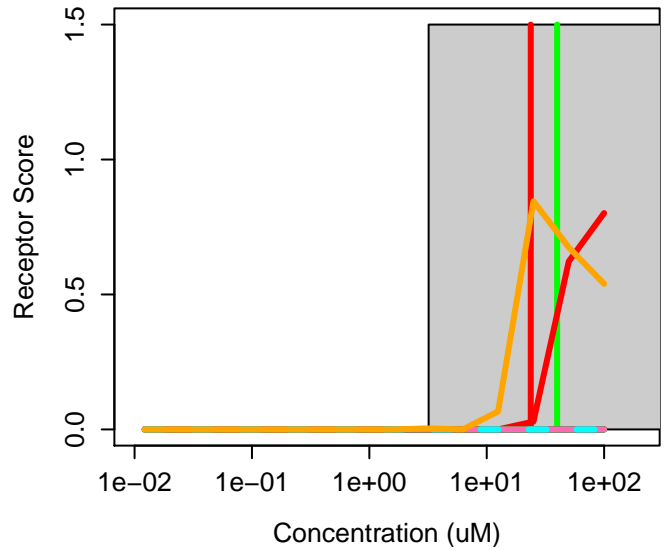

29122-68-7 : Atenolol

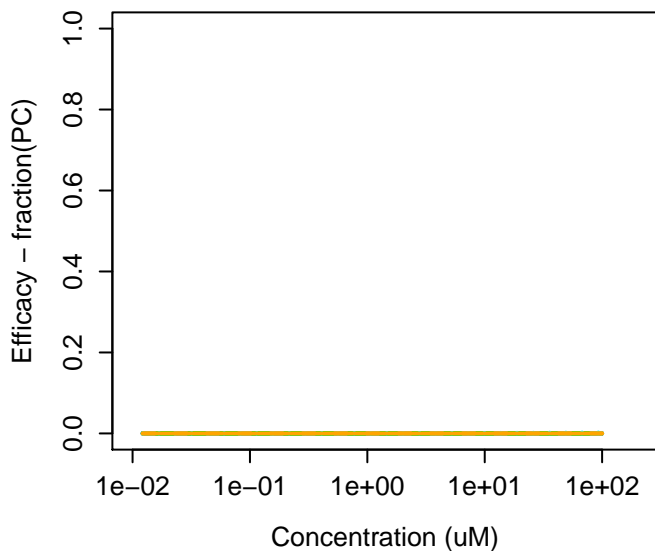

29122-68-7 : Atenolol  
Agonist: 0 Antagonist: 0

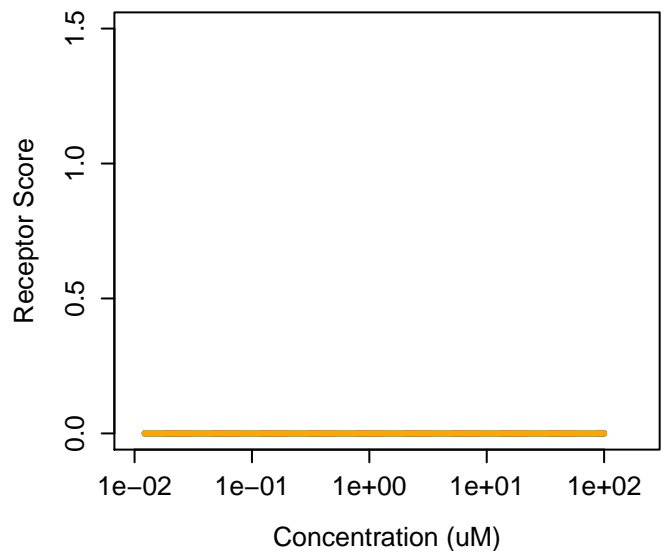

291305-06-1 : UK-373911

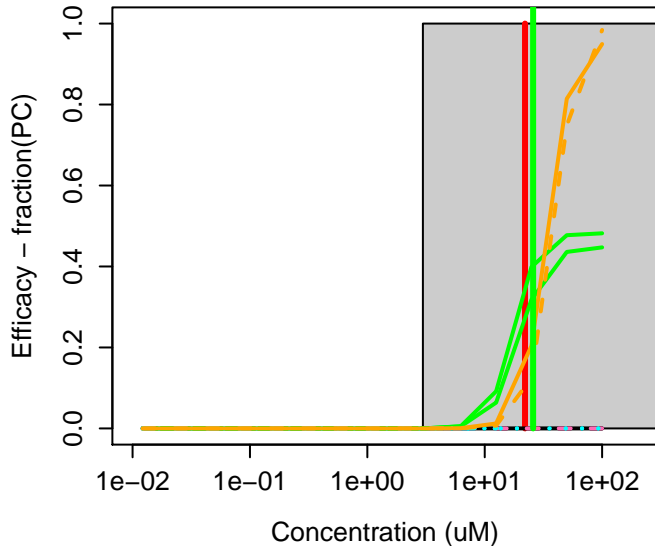

291305-06-1 : UK-373911  
Agonist: 0 Antagonist: 0.13

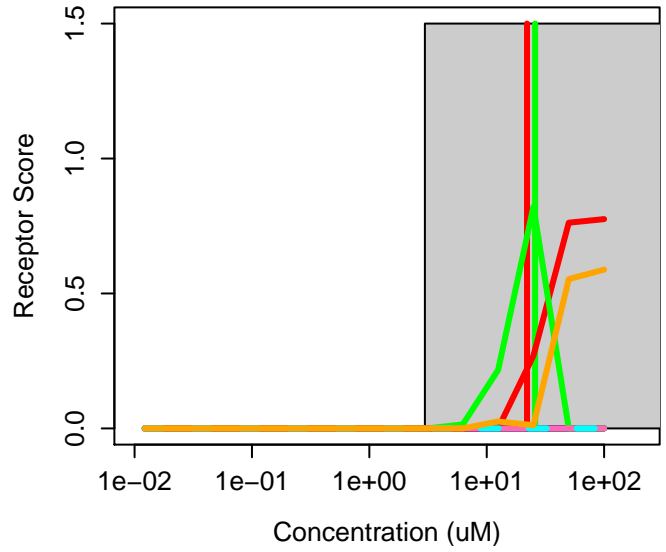

2917-73-9 : Dibutyl nonanedioate

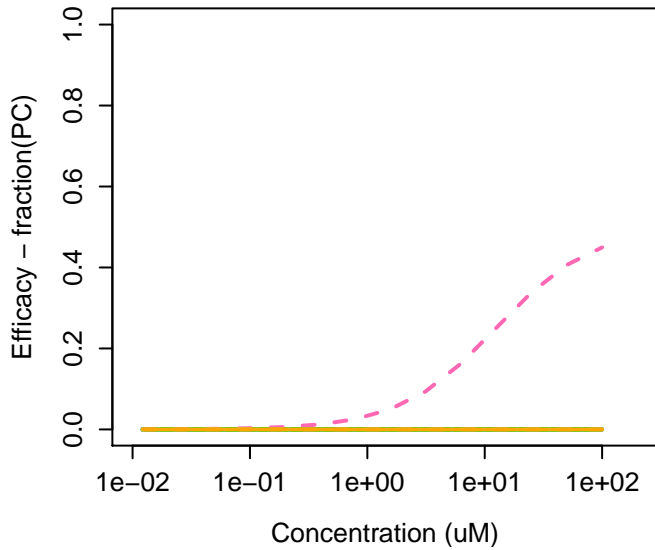

2917-73-9 : Dibutyl nonanedioate  
Agonist: 0 Antagonist: 0

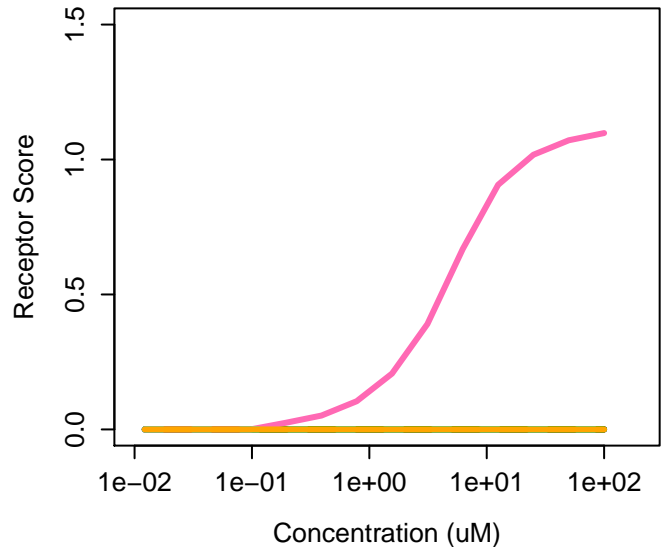

2919-66-6 : Melengestrol acetate

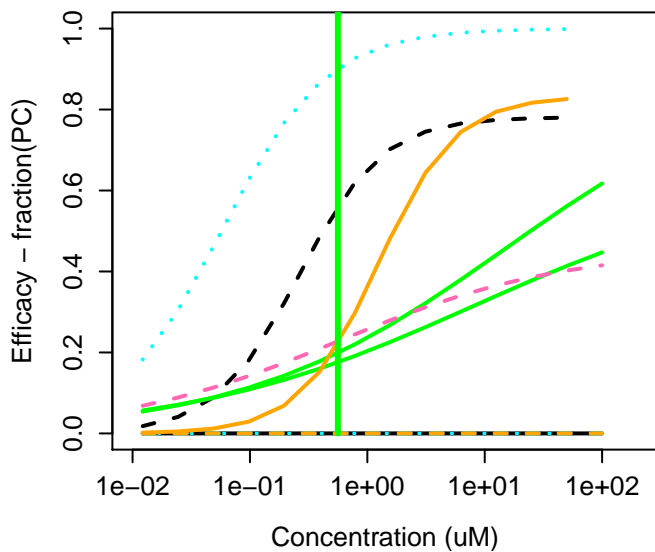

2919-66-6 : Melengestrol acetate  
Agonist: 0.45 Antagonist: 0.17

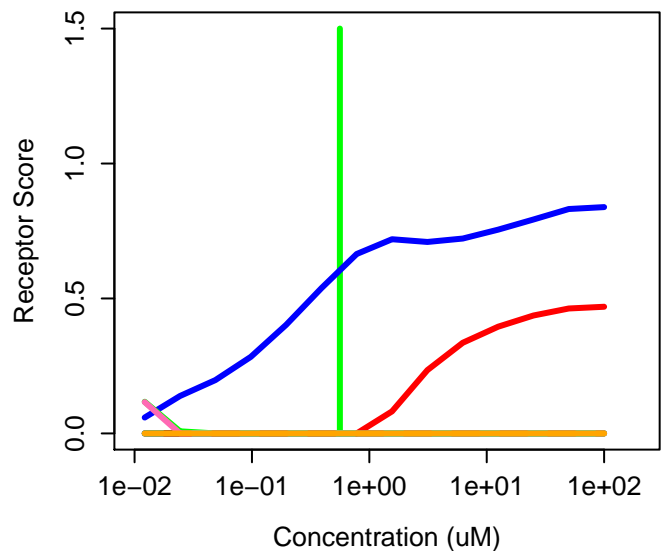

2921-88-2 : Chlorpyrifos

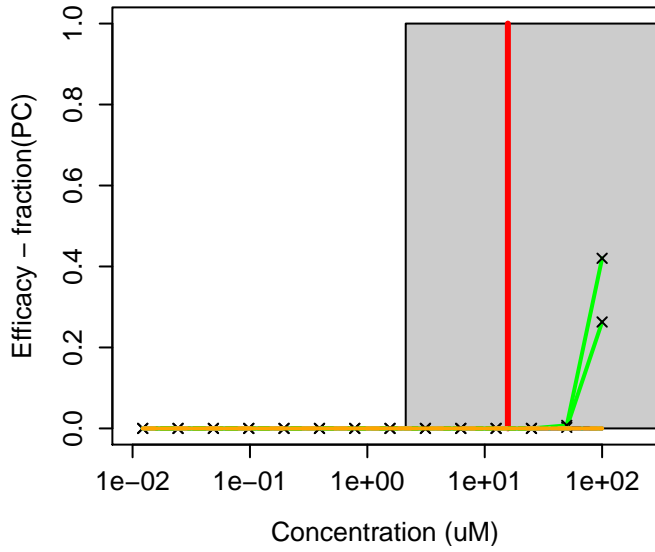

2921-88-2 : Chlorpyrifos  
Agonist: 0 Antagonist: 0

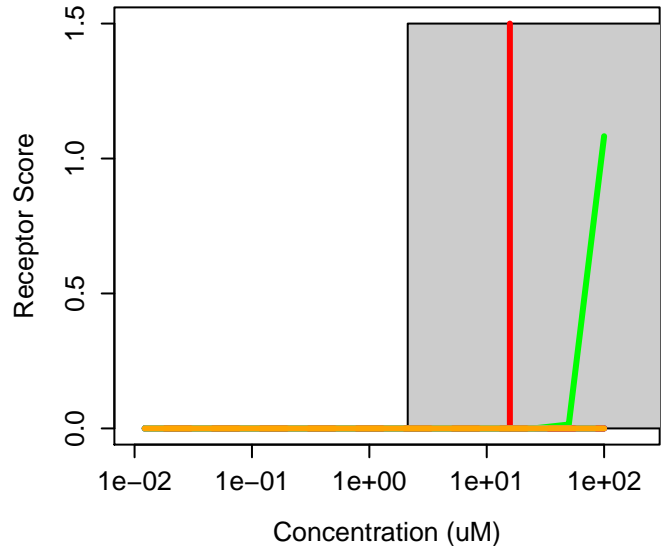

29232-93-7 : Pirimiphos-methyl

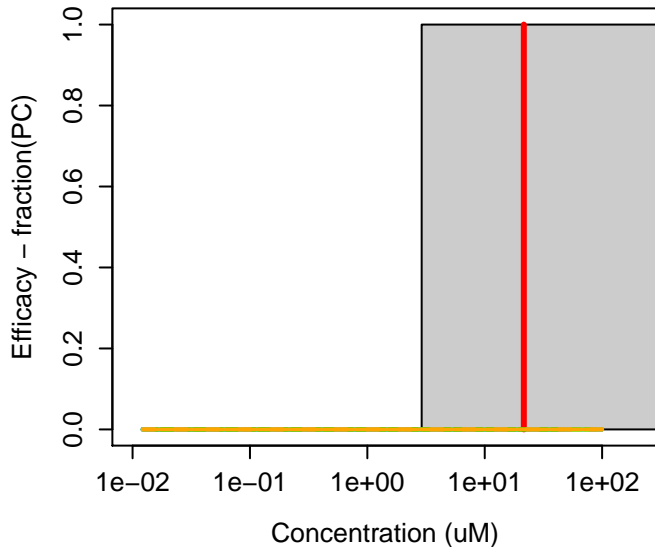

29232-93-7 : Pirimiphos-methyl  
Agonist: 0 Antagonist: 0

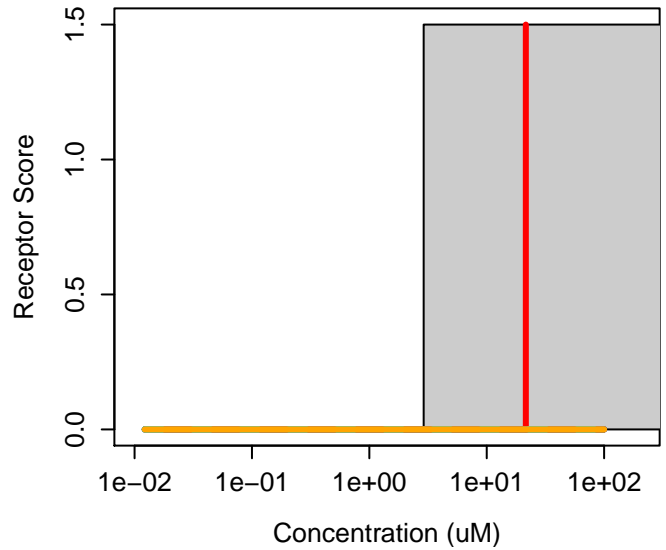

2934-05-6 : 2,4-Diisopropylphenol

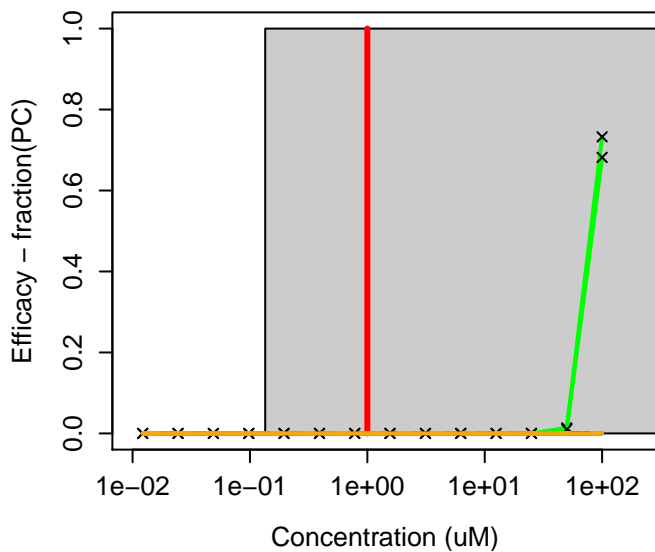

2934-05-6 : 2,4-Diisopropylphenol  
Agonist: 0 Antagonist: 0

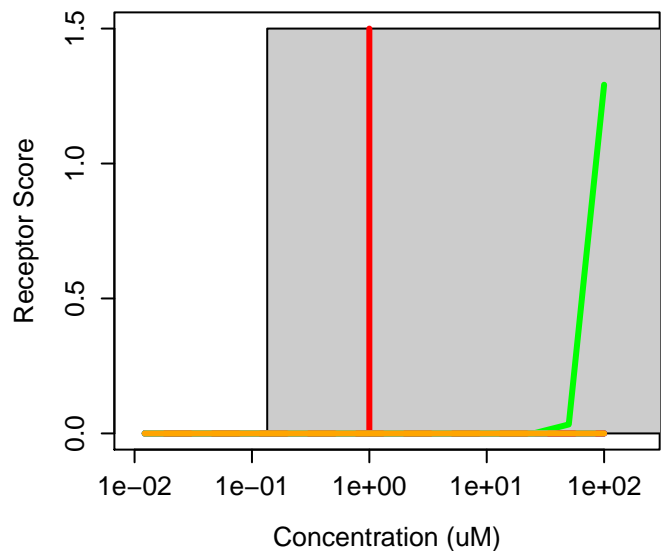

29385-43-1 : Tolyltriazole

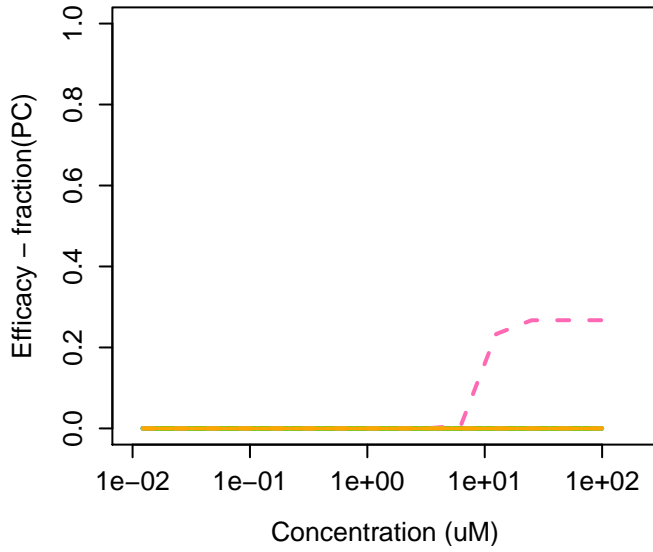

29385-43-1 : Tolyltriazole  
Agonist: 0 Antagonist: 0

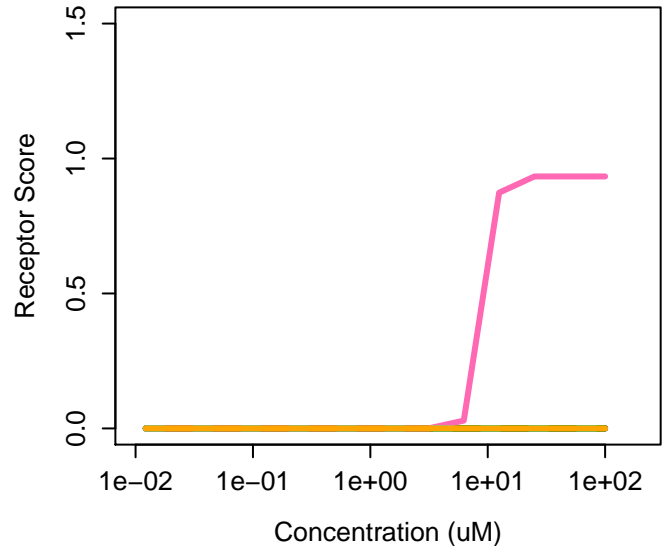

29387-86-8 : Propylene glycol monobutyl ether



29387-86-8 : Propylene glycol monobutyl ether  
Agonist: 0 Antagonist: 0



29420-49-3 : PFBS-K



29420-49-3 : PFBS-K  
Agonist: 0 Antagonist: 0





2943-75-1 : Triethoxyoctylsilane

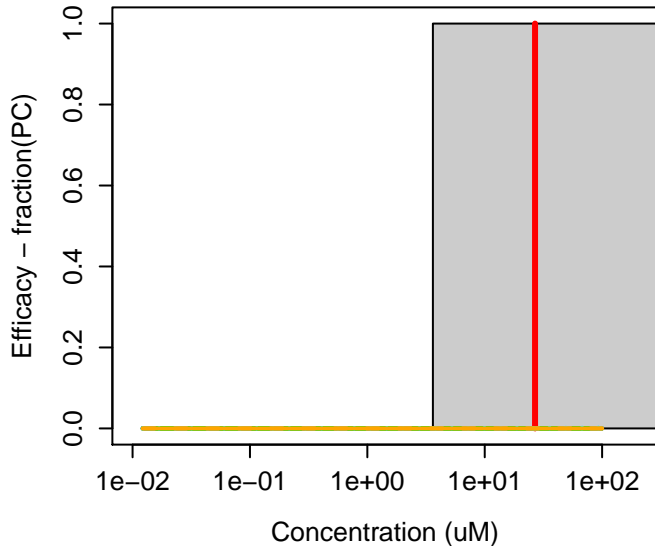

2943-75-1 : Triethoxyoctylsilane  
Agonist: 0 Antagonist: 0

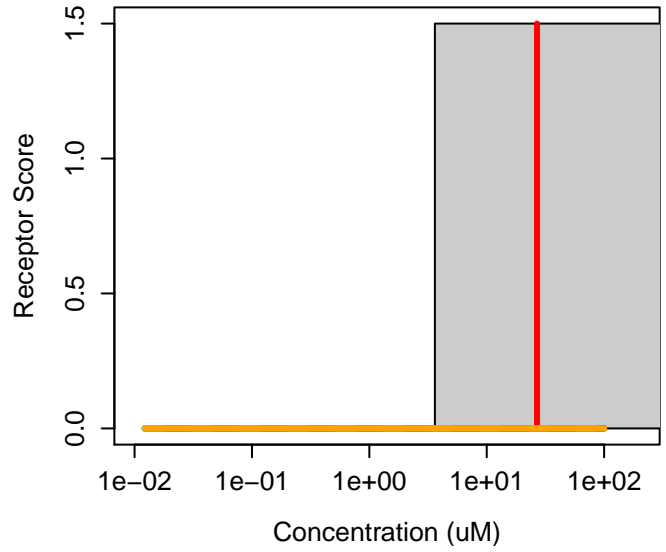

29590-42-9 : Isooctyl acrylate

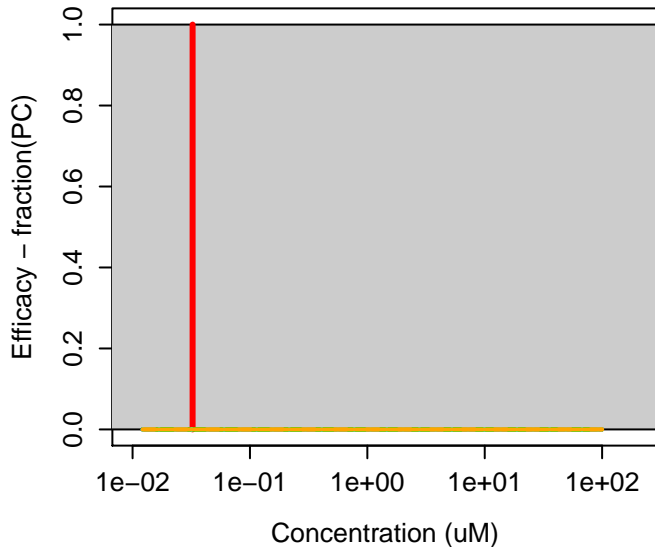

29590-42-9 : Isooctyl acrylate  
Agonist: 0 Antagonist: 0

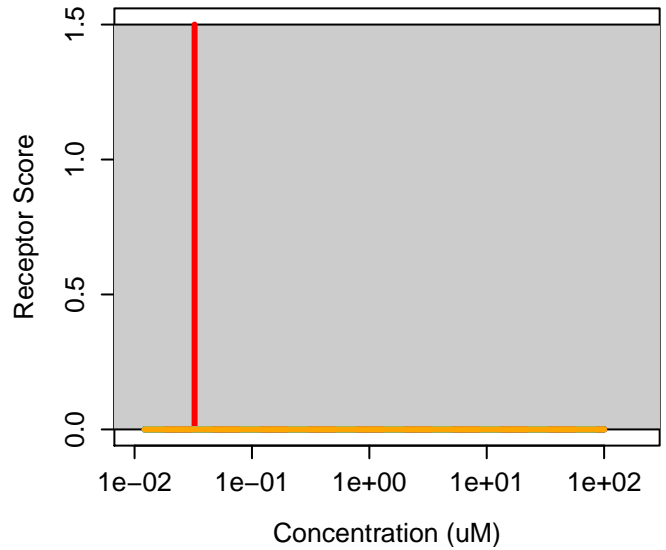

971-36-0 : 2,2-Bis(4-hydroxyphenyl)-1,1,1-trichloroethane  
Agonist: 0 Antagonist: 0.55

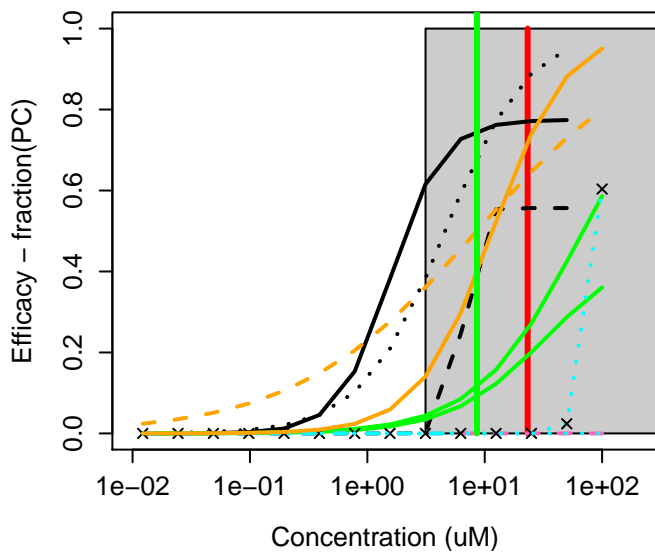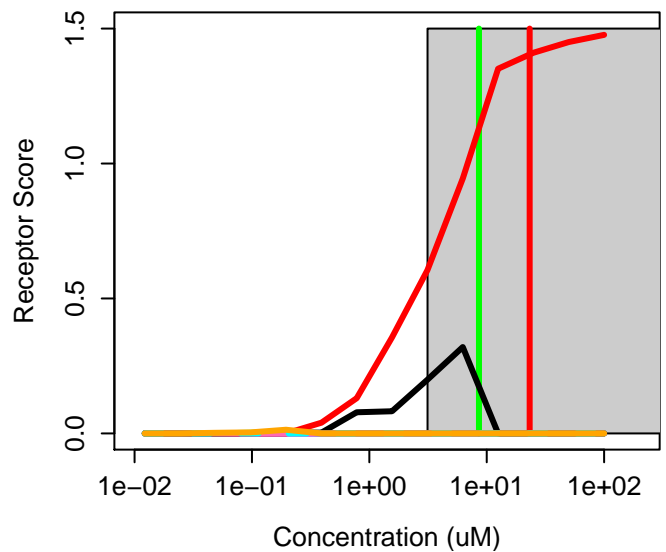

**298-00-0 : Methyl parathion**

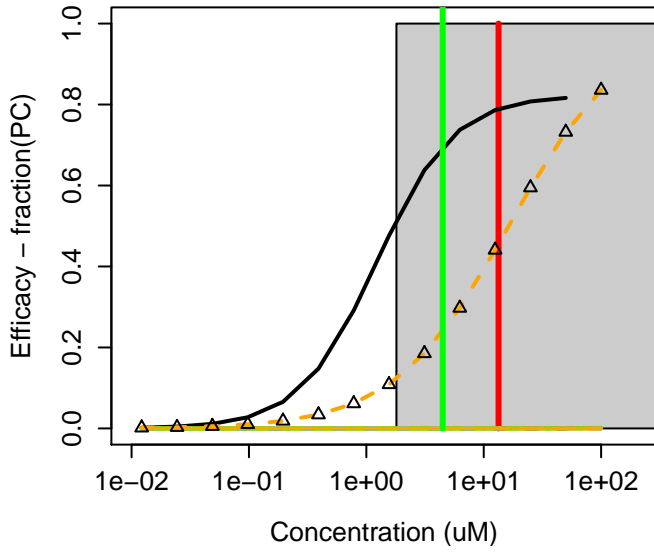

**298-00-0 : Methyl parathion**  
**Agonist: 0 Antagonist: 0.15**

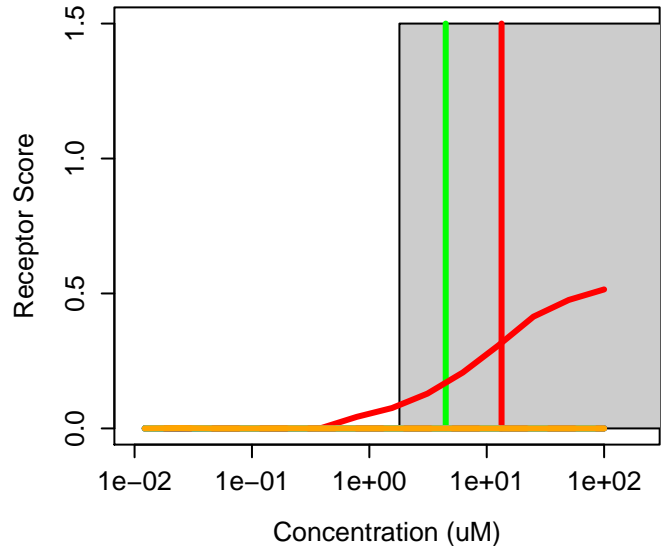

**298-02-2 : Phorate**



**298-02-2 : Phorate**  
**Agonist: 0 Antagonist: 0**



**298-04-4 : Disulfoton**

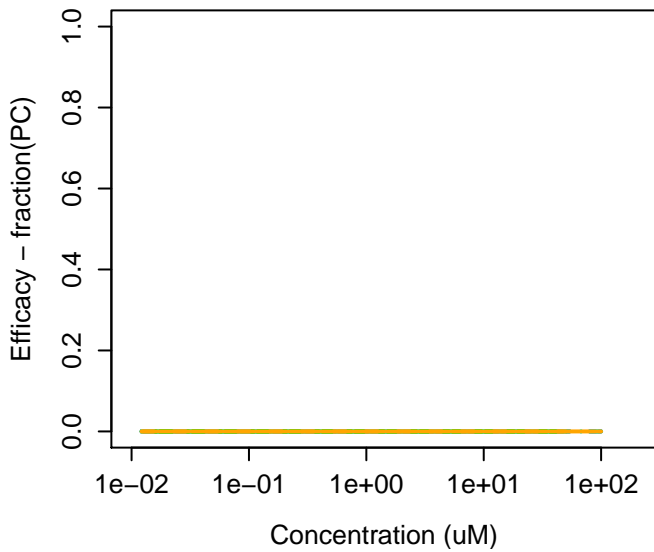

**298-04-4 : Disulfoton**  
**Agonist: 0 Antagonist: 0**



298-07-7 : Bis(2-ethylhexyl) phosphate

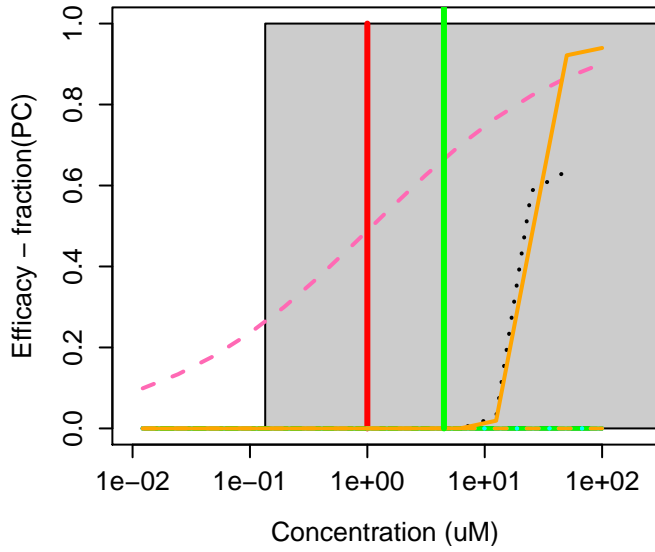

298-07-7 : Bis(2-ethylhexyl) phosphate  
Agonist: 0.017 Antagonist: 0.06

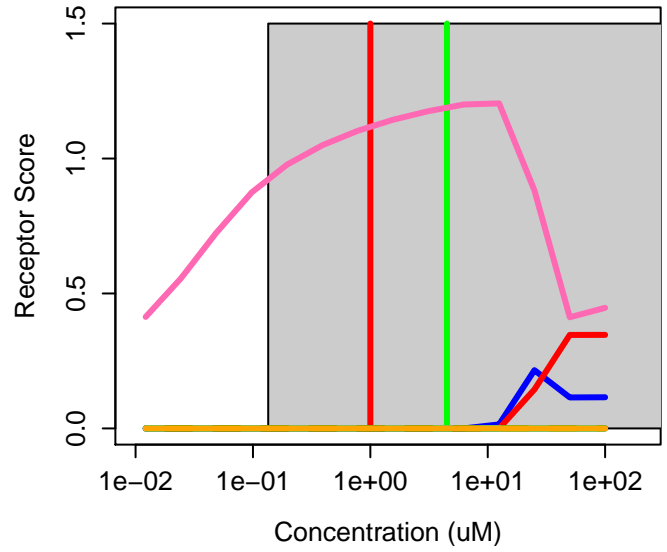

298198-52-4 : SSR180711

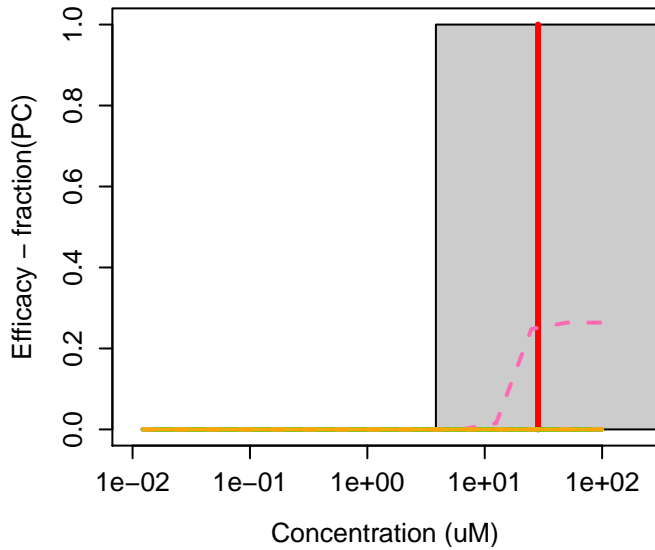

298198-52-4 : SSR180711  
Agonist: 0 Antagonist: 0

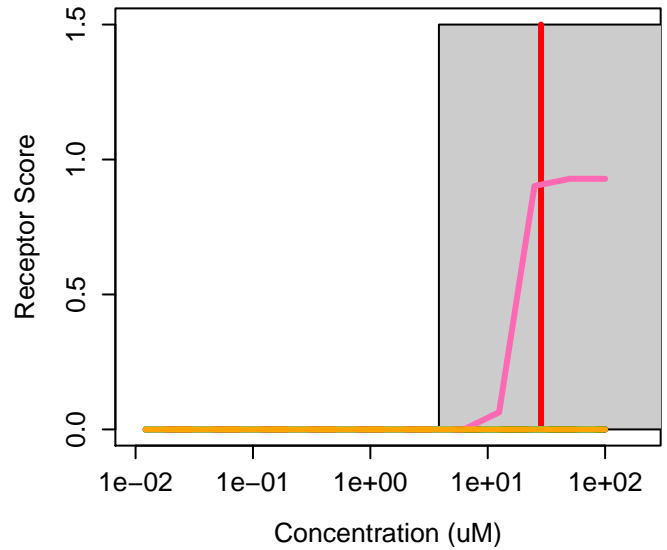

29836-26-8 : Octyl beta-D-glucopyranoside



29836-26-8 : Octyl beta-D-glucopyranoside  
Agonist: 0 Antagonist: 0



298-46-4 : Carbamazepine



298-46-4 : Carbamazepine  
Agonist: 0 Antagonist: 0



2996-92-1 : Trimethoxyphenylsilane

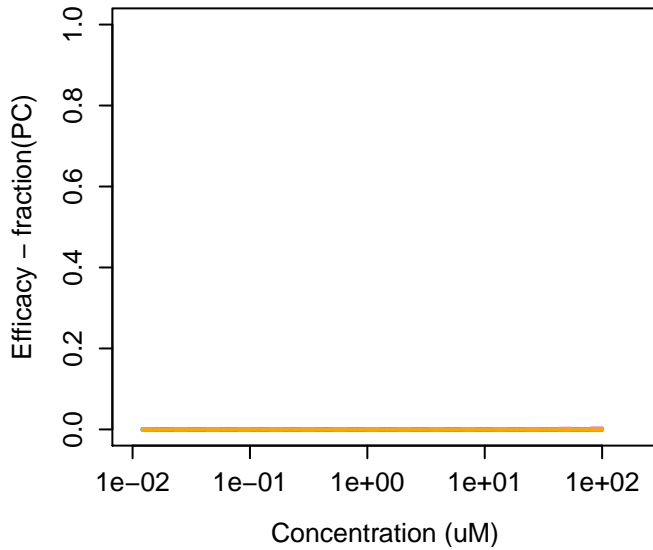

2996-92-1 : Trimethoxyphenylsilane  
Agonist: 0 Antagonist: 0

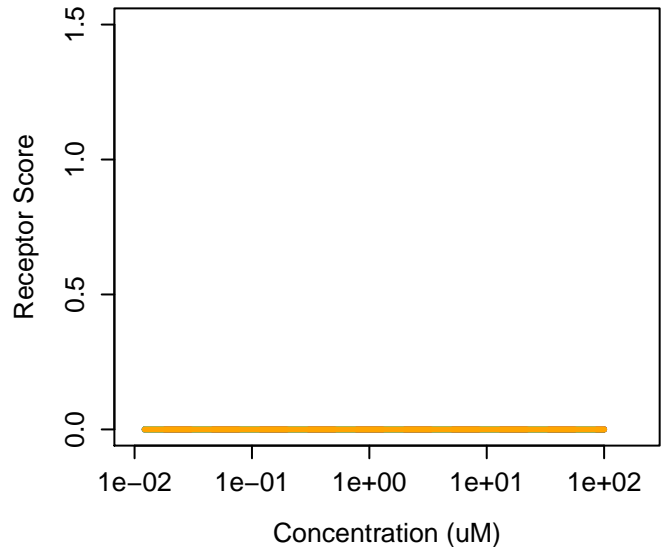

300-76-5 : Naled

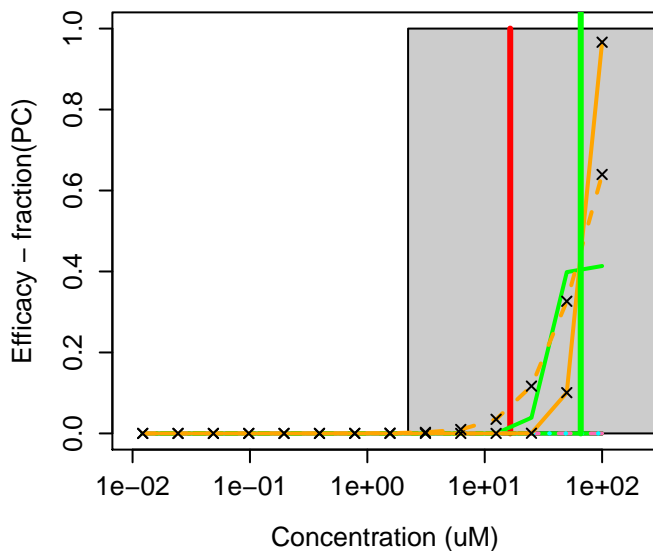

300-76-5 : Naled  
Agonist: 0 Antagonist: 0.04

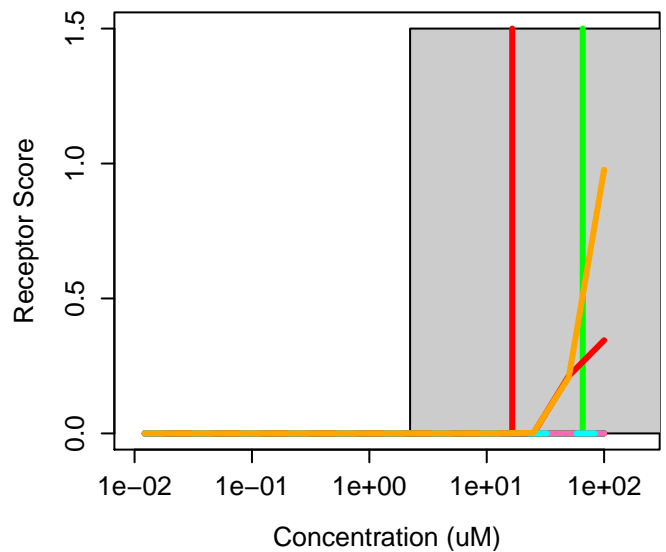

3025-30-7 : Ethyl (2E,4Z)-deca-2,4-dienoate

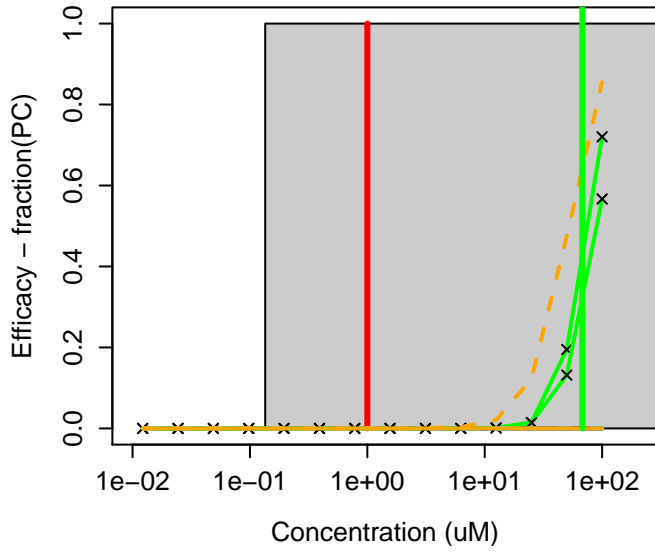

3025-30-7 : Ethyl (2E,4Z)-deca-2,4-dienoate  
Agonist: 0 Antagonist: 0.067

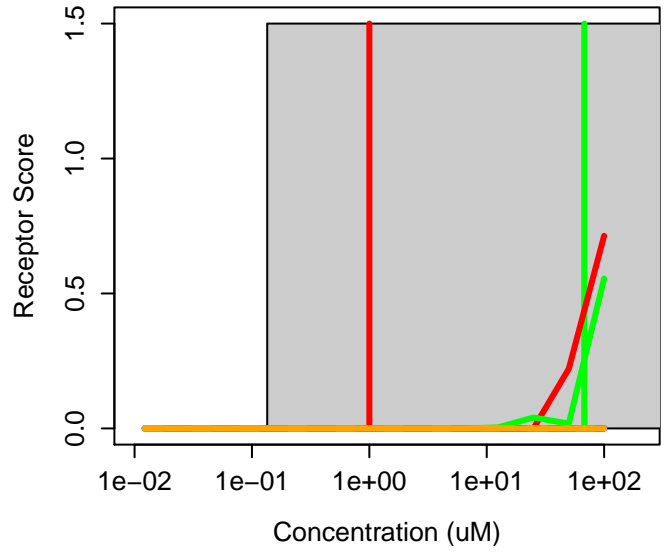

3026-63-9 : Sodium tridecyl sulfate

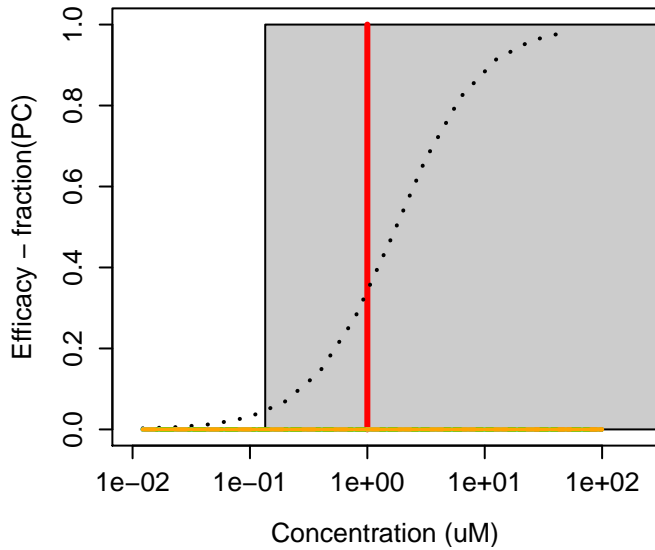

3026-63-9 : Sodium tridecyl sulfate  
Agonist: 0 Antagonist: 5.9e-05

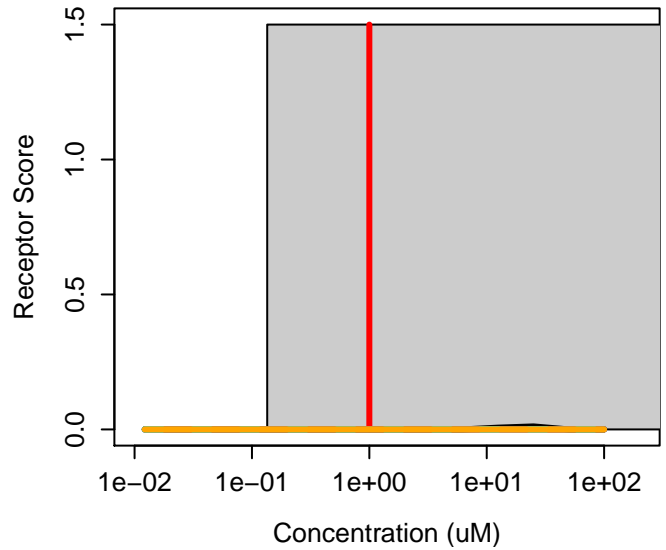

302-79-4 : all-trans-Retinoic acid

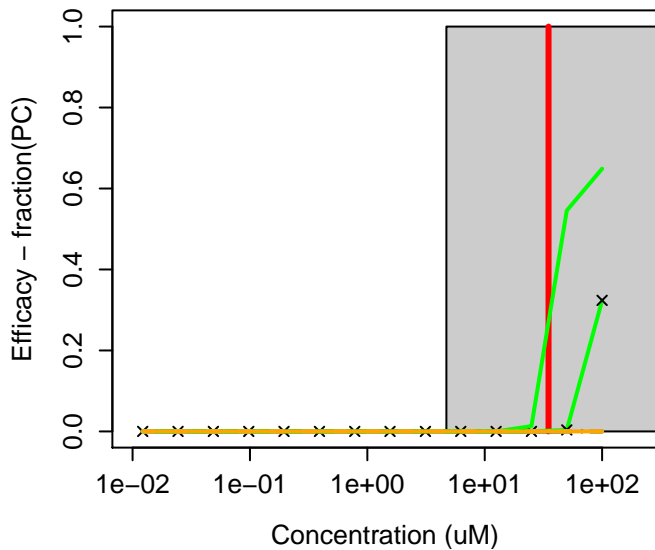

302-79-4 : all-trans-Retinoic acid  
Agonist: 0 Antagonist: 0

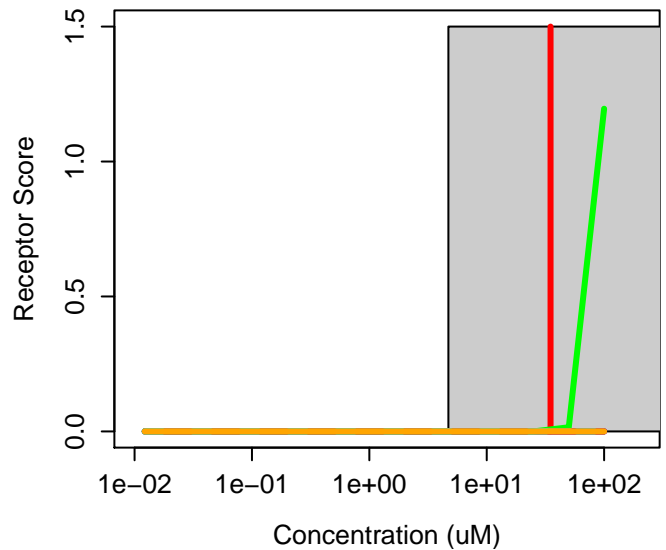

**3-77-0 : N,N,N-Trimethyl(oxiran-2-yl)methanaminium** **3-77-0 : N,N,N-Trimethyl(oxiran-2-yl)methanaminium**  
**Agonist: 0 Antagonist: 0**

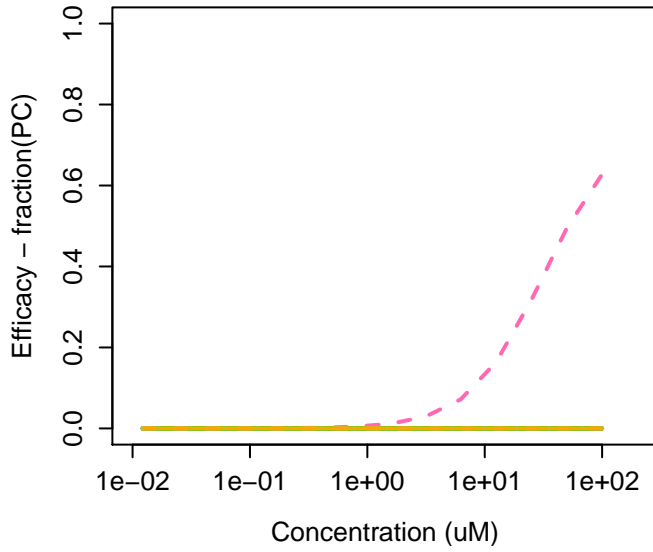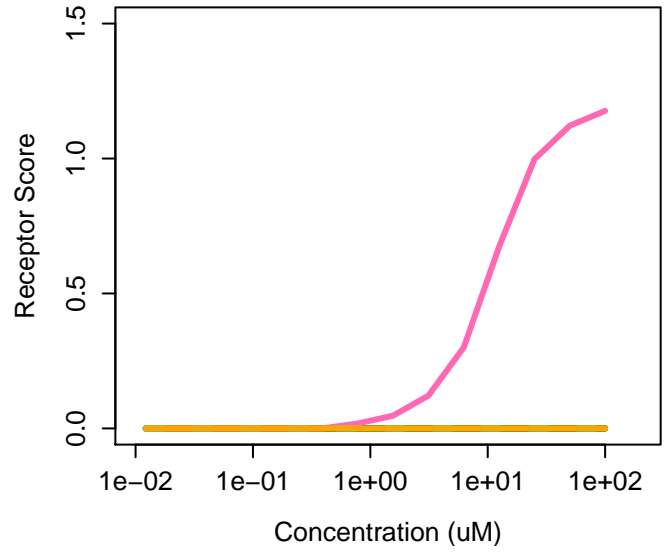

**30399-84-9 : Isooctadecanoic acid**

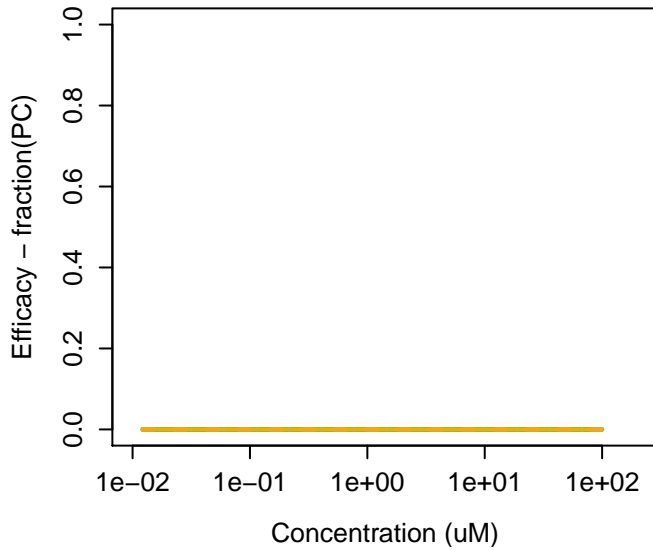

**30399-84-9 : Isooctadecanoic acid**  
**Agonist: 0 Antagonist: 0**

**30516-87-1 : 3'-Azido-3'-deoxythymidine**



**30516-87-1 : 3'-Azido-3'-deoxythymidine**  
**Agonist: 0 Antagonist: 0**

**30560-19-1 : Acephate**

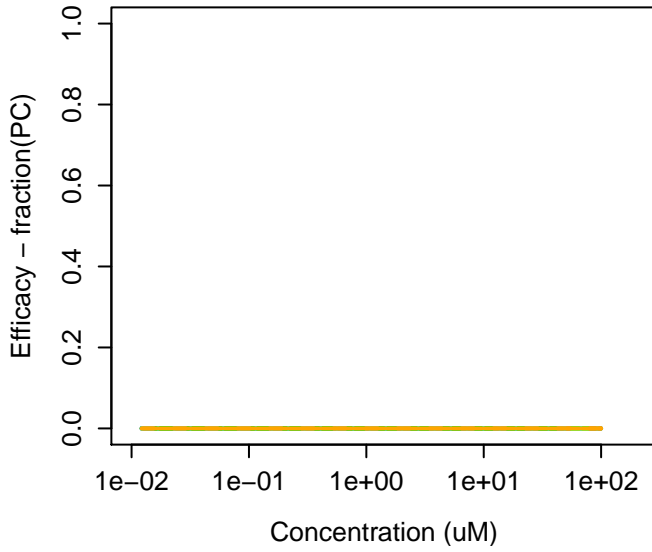

**30560-19-1 : Acephate  
Agonist: 0 Antagonist: 0**



**3056-17-5 : Stavudine**



**3056-17-5 : Stavudine  
Agonist: 0 Antagonist: 0**



**307-24-4 : PFHxA**

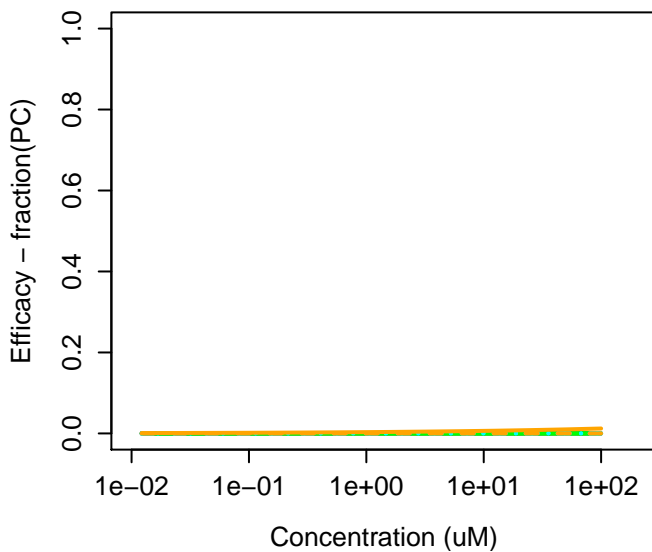

**307-24-4 : PFHxA  
Agonist: 0 Antagonist: 0**

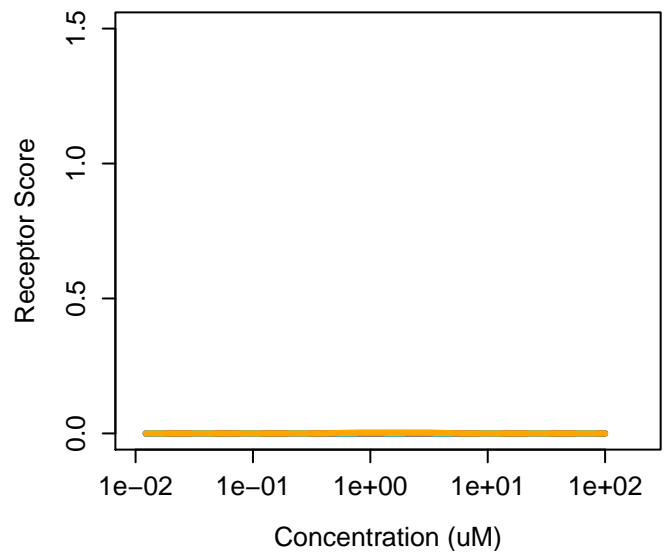

309-00-2 : Aldrin

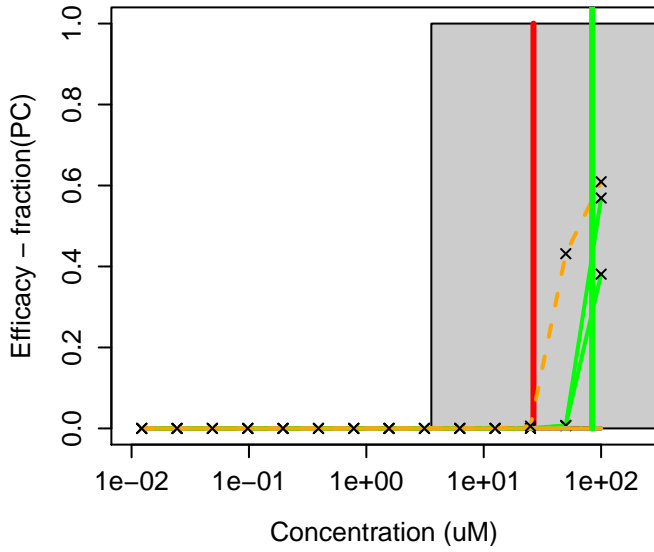

309-00-2 : Aldrin  
Agonist: 0 Antagonist: 0.035

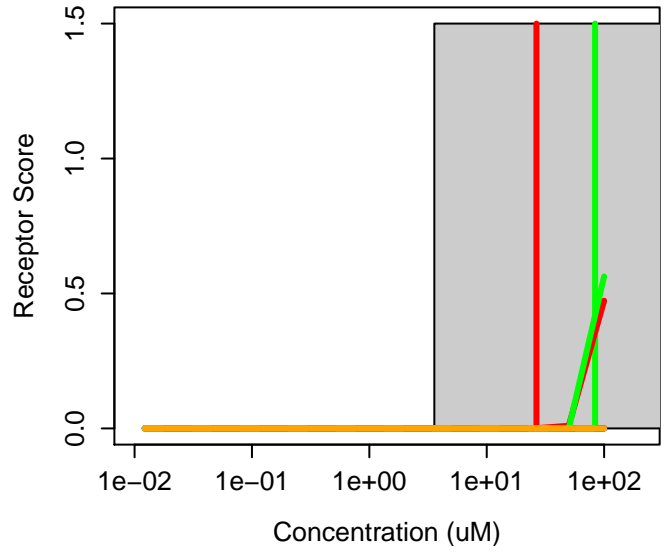

311-45-5 : Paraoxon

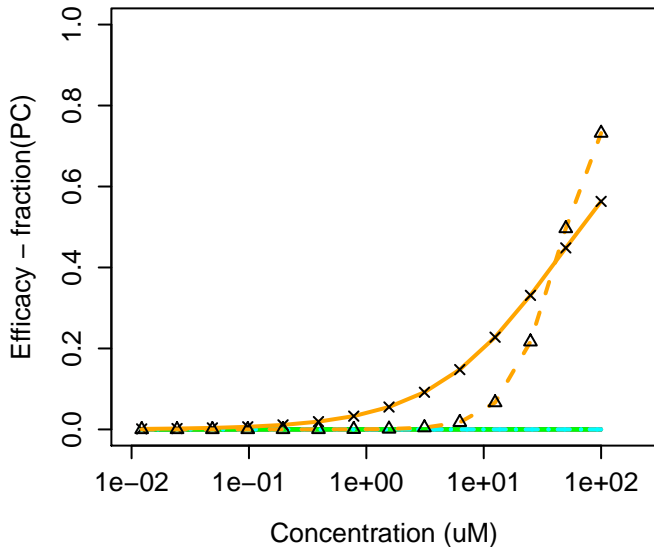

311-45-5 : Paraoxon  
Agonist: 0 Antagonist: 0

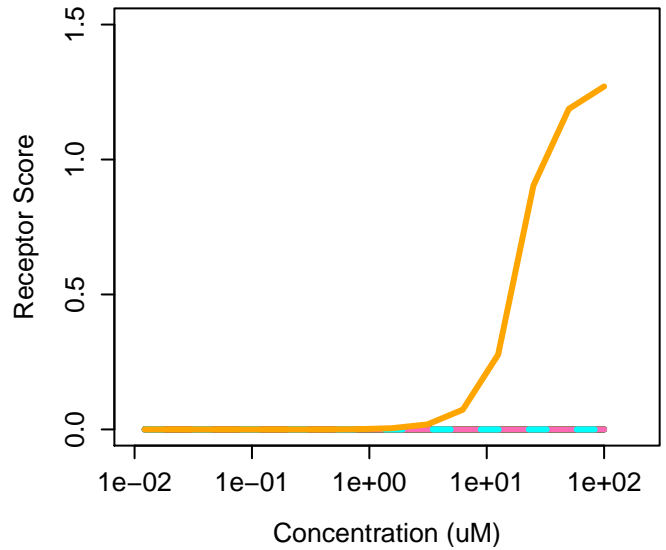

31218-83-4 : Propetamphos



31218-83-4 : Propetamphos  
Agonist: 0 Antagonist: 0





313994-79-5 : MK-578

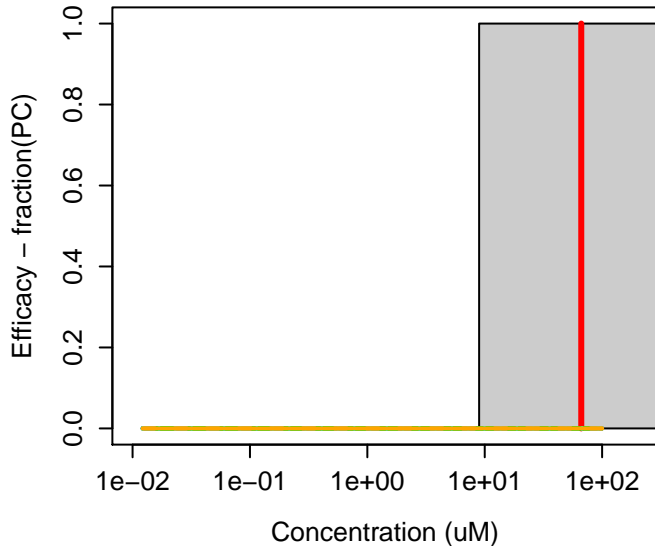

313994-79-5 : MK-578  
Agonist: 0 Antagonist: 0

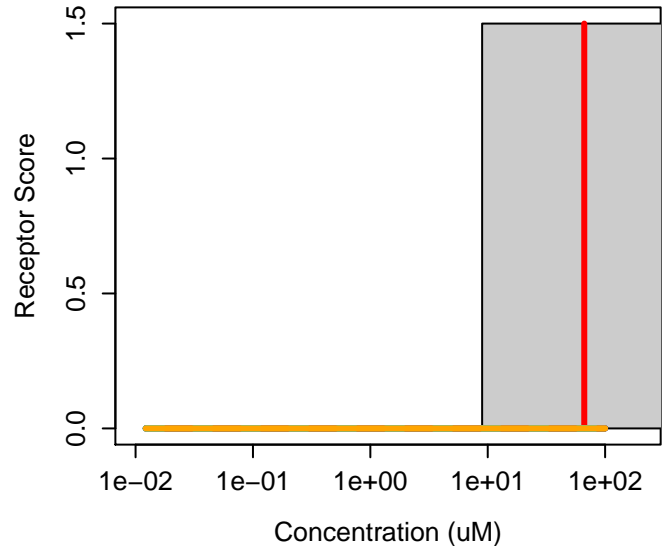

314-40-9 : Bromacil



314-40-9 : Bromacil  
Agonist: 0 Antagonist: 0



3147-75-9 : Octrizole

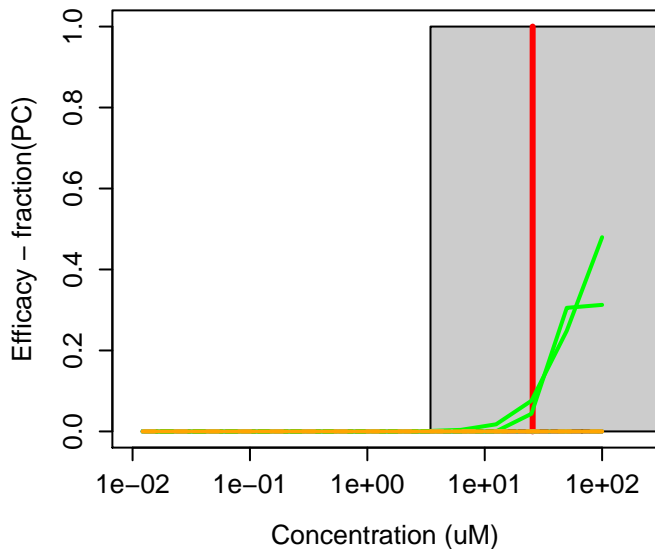

3147-75-9 : Octrizole  
Agonist: 0 Antagonist: 0

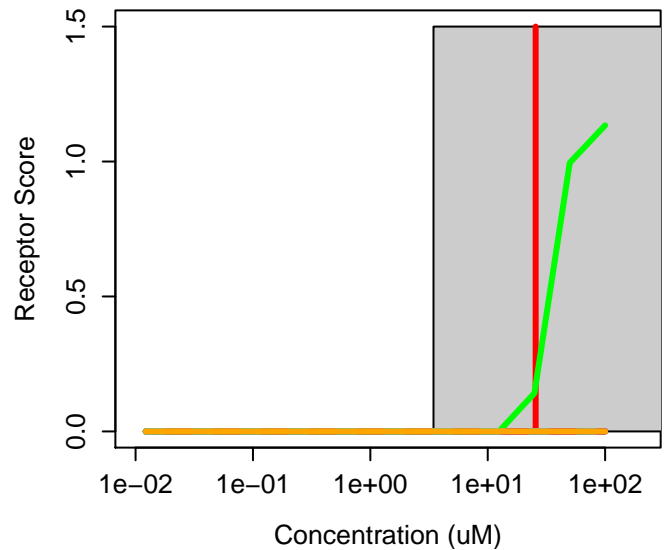

31519-22-9 : 1,4-Dihydroxy-2-naphthoic acid

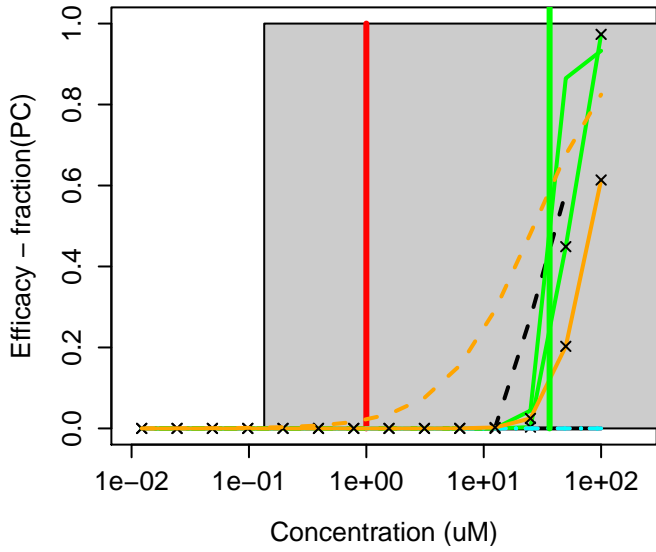

31519-22-9 : 1,4-Dihydroxy-2-naphthoic acid  
Agonist: 0 Antagonist: 0.2

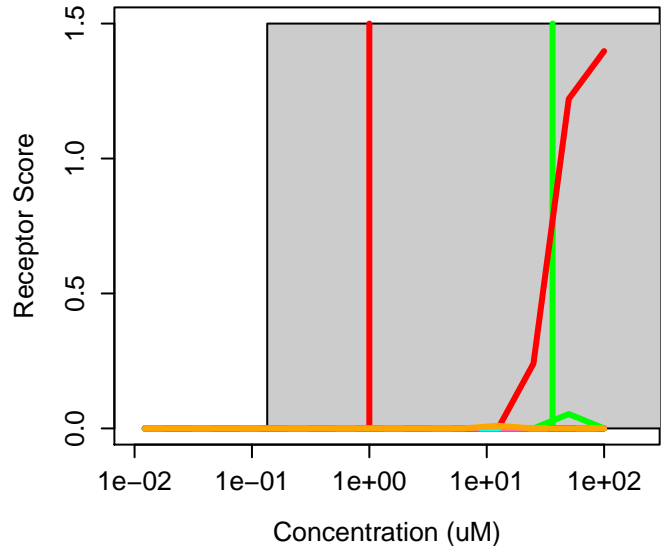

3164-85-0 : Potassium 2-ethylhexanoate

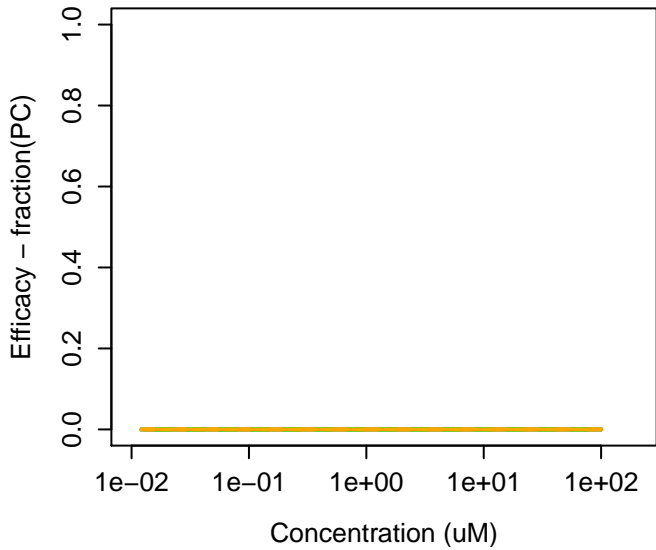

3164-85-0 : Potassium 2-ethylhexanoate  
Agonist: 0 Antagonist: 0



3194-55-6 : 1,2,5,6,9,10-Hexabromocyclododecar

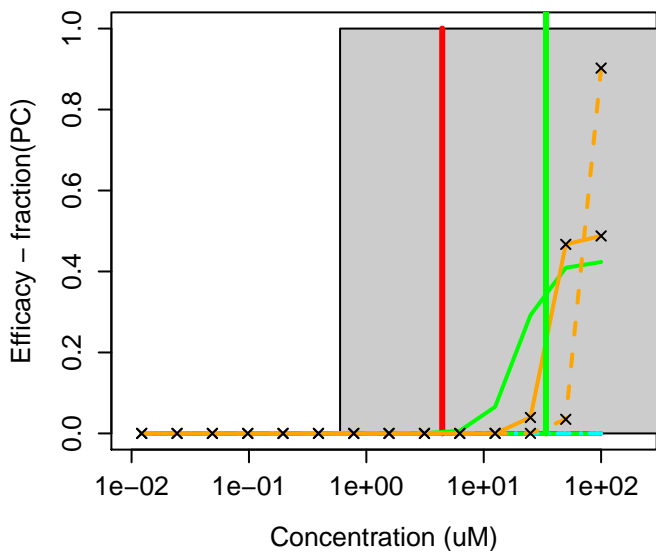

3194-55-6 : 1,2,5,6,9,10-Hexabromocyclododecar  
Agonist: 0 Antagonist: 0.045

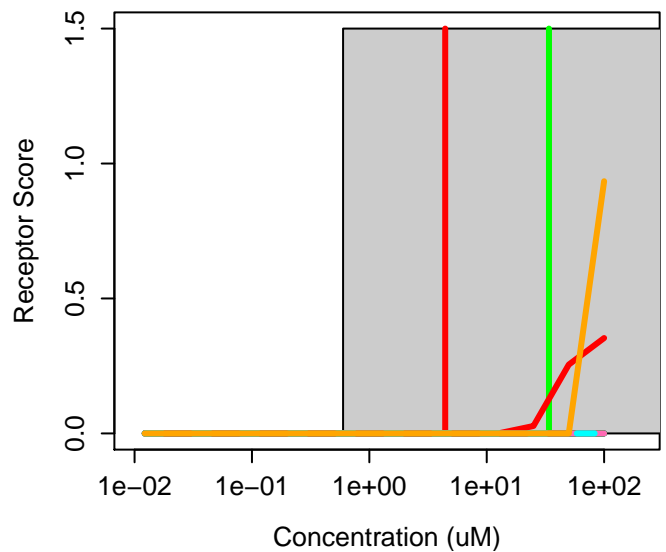

319-85-7 : beta-Hexachlorocyclohexane



319-85-7 : beta-Hexachlorocyclohexane  
Agonist: 0 Antagonist: 0



32388-55-9 : 1-Cedr-8-en-9-ylethanone

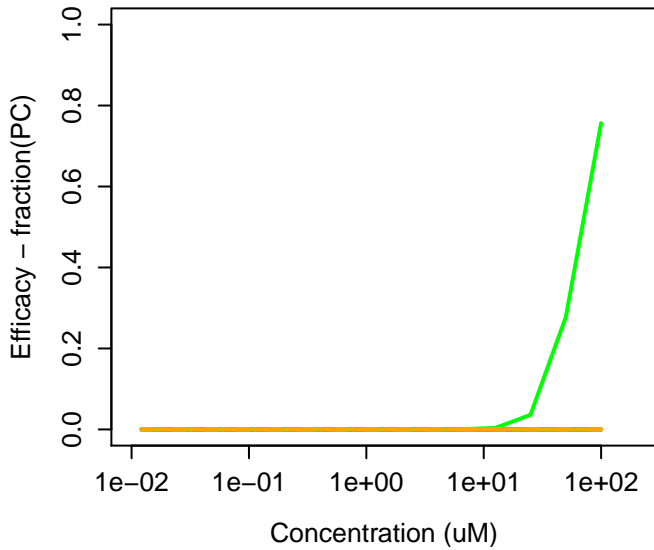

32388-55-9 : 1-Cedr-8-en-9-ylethanone  
Agonist: 0 Antagonist: 0

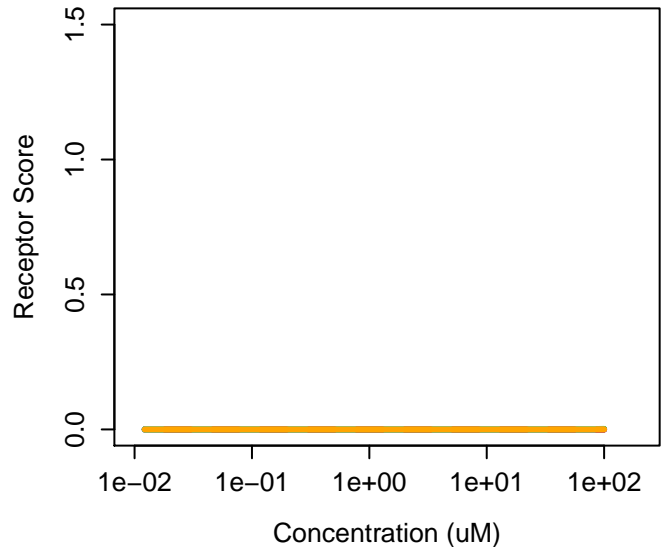

3252-43-5 : Dibromoacetonitrile

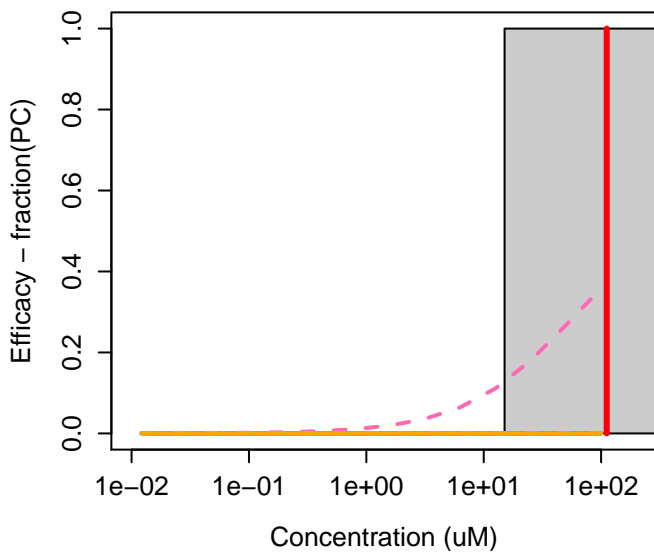

3252-43-5 : Dibromoacetonitrile  
Agonist: 0 Antagonist: 0

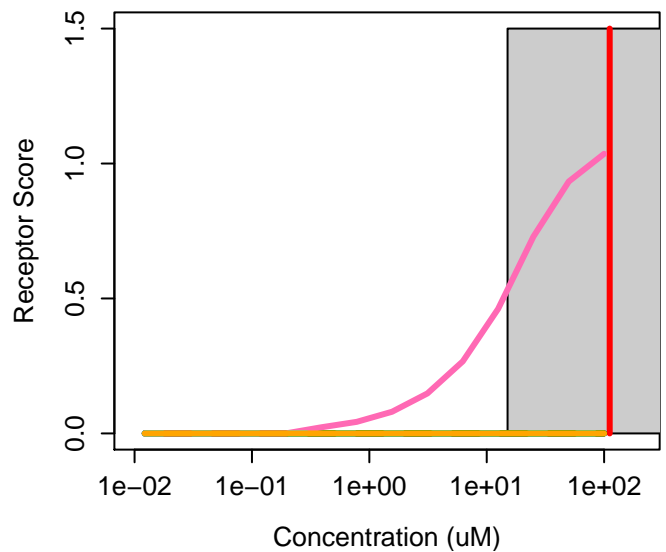

3268-49-3 : 3-(Methylthio)propanal



3268-49-3 : 3-(Methylthio)propanal  
Agonist: 0 Antagonist: 0



32809-16-8 : Procymidone

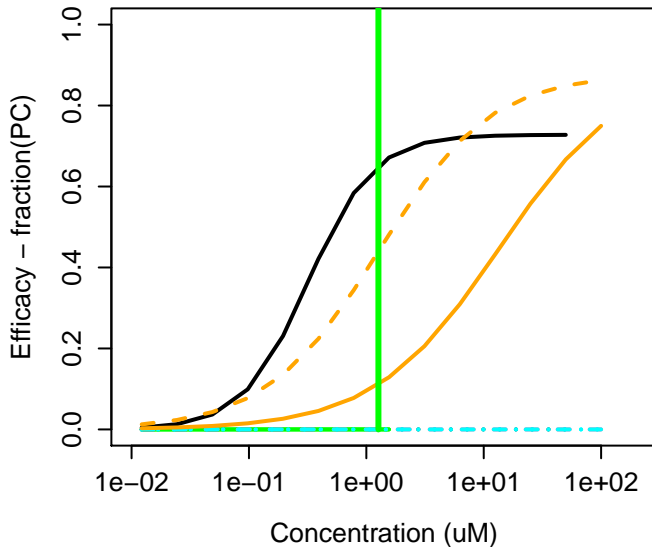

32809-16-8 : Procymidone  
Agonist: 0 Antagonist: 0.32

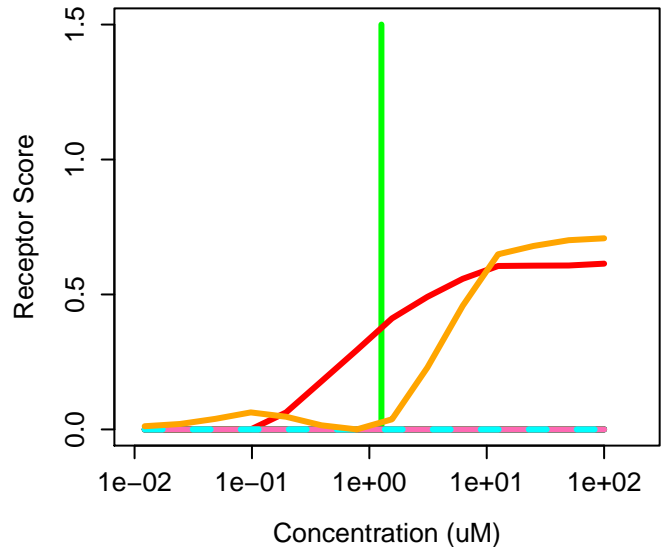

328-84-7 : 1,2-Dichloro-4-(trifluoromethyl)benzene



328-84-7 : 1,2-Dichloro-4-(trifluoromethyl)benzene  
Agonist: 0 Antagonist: 0



3296-90-0 : 2,2-Bis(bromomethyl)-1,3-propanedi

3296-90-0 : 2,2-Bis(bromomethyl)-1,3-propanedi  
Agonist: 0 Antagonist: 0



330-54-1 : Diuron

330-54-1 : Diuron  
Agonist: 0 Antagonist: 0

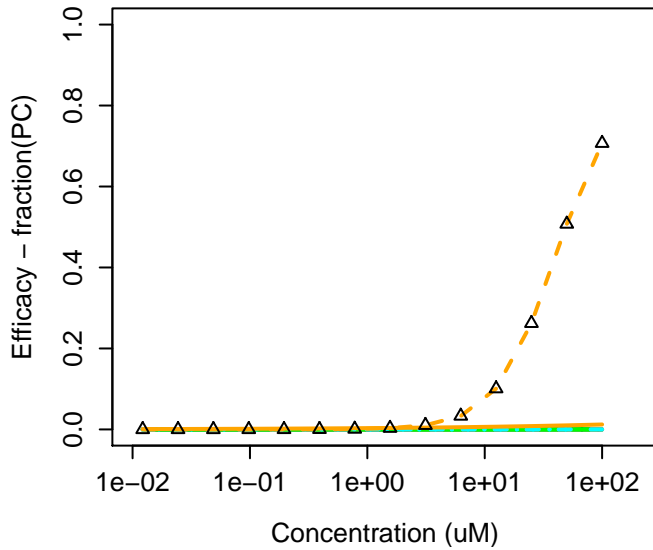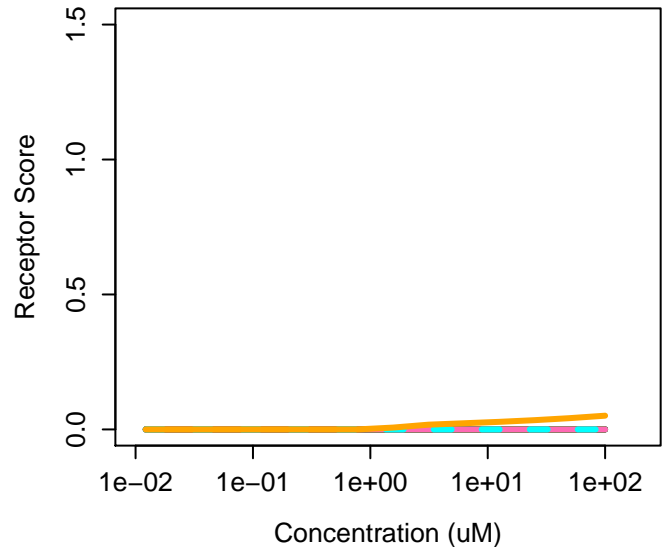

330-55-2 : Linuron

330-55-2 : Linuron  
Agonist: 0 Antagonist: 0.3

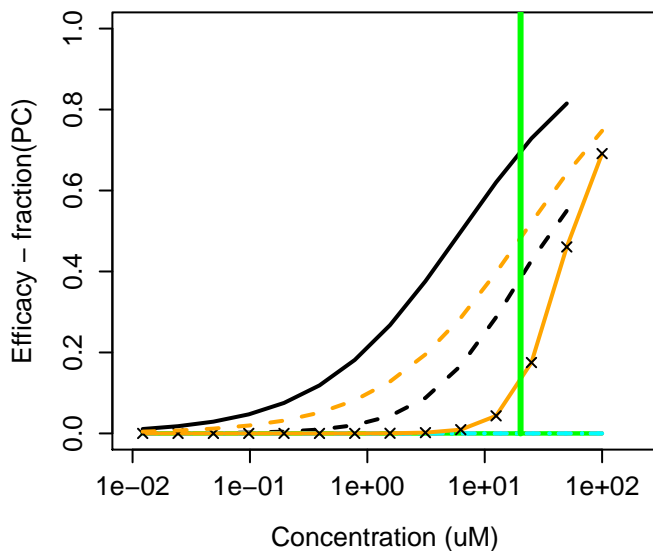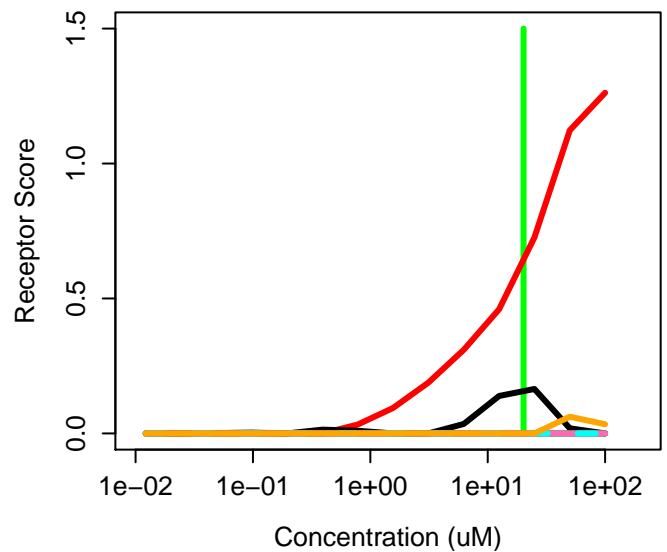

**33089-61-1 : Amitraz**

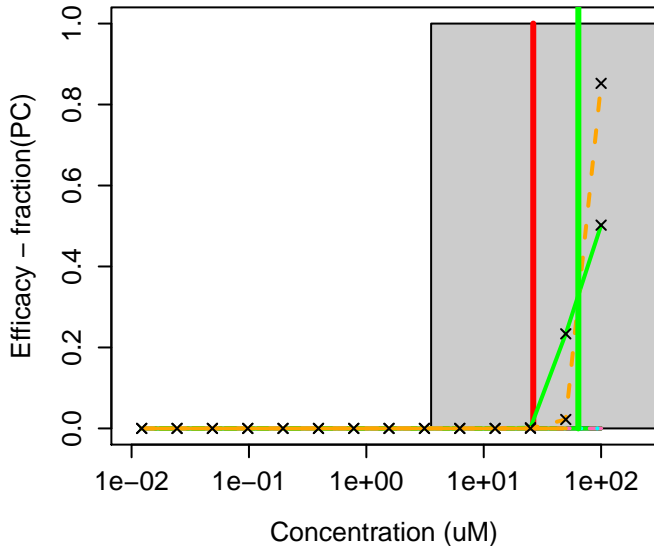

**33089-61-1 : Amitraz**  
**Agonist: 0 Antagonist: 0.026**

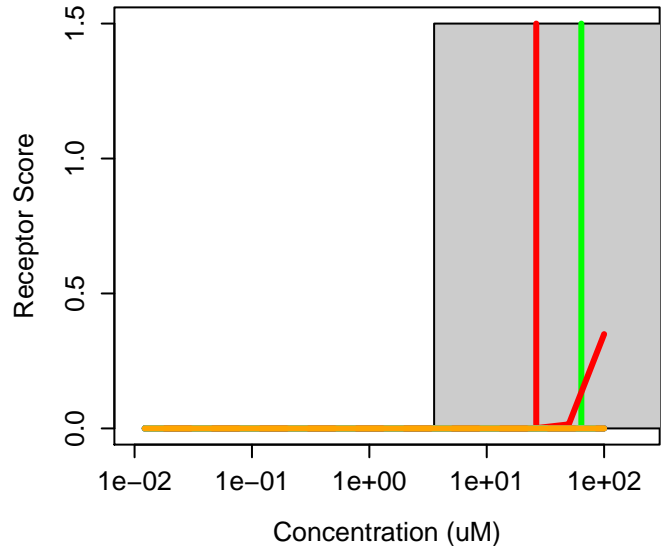

**331623-06-4 : MK-547**



**331623-06-4 : MK-547**  
**Agonist: 0 Antagonist: 0**



**3319-31-1 : Tris(2-ethylhexyl) trimellitate**



**3319-31-1 : Tris(2-ethylhexyl) trimellitate**  
**Agonist: 0 Antagonist: 0**



33228-44-3 : 4-Pentylaniline

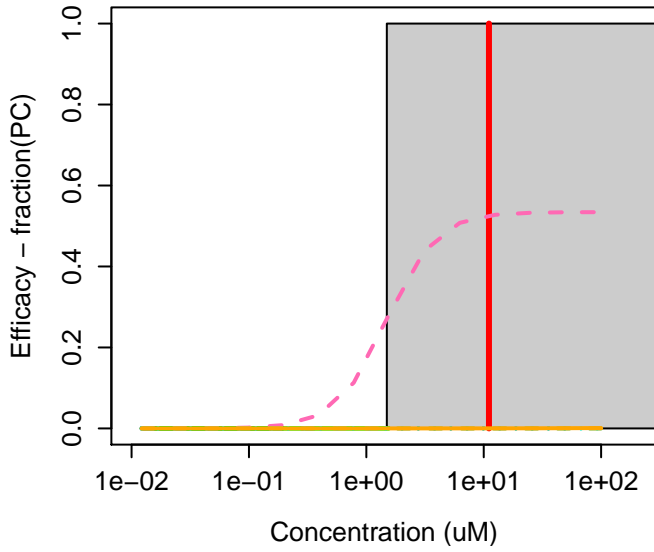

33228-44-3 : 4-Pentylaniline  
Agonist: 0 Antagonist: 0

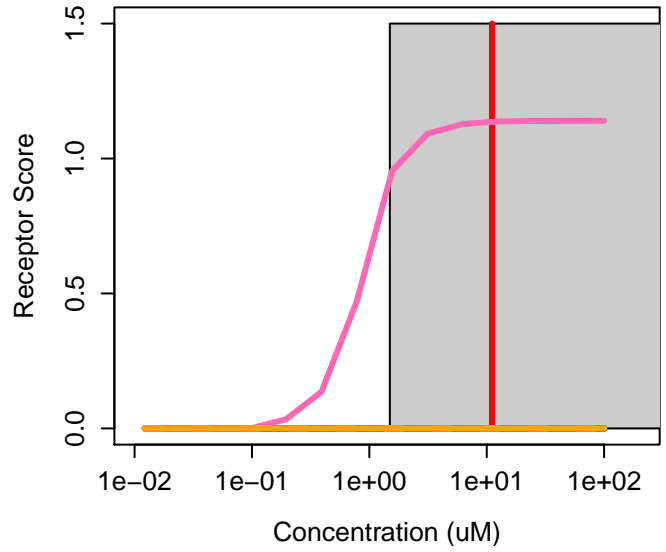

33228-45-4 : 4-Hexylaniline

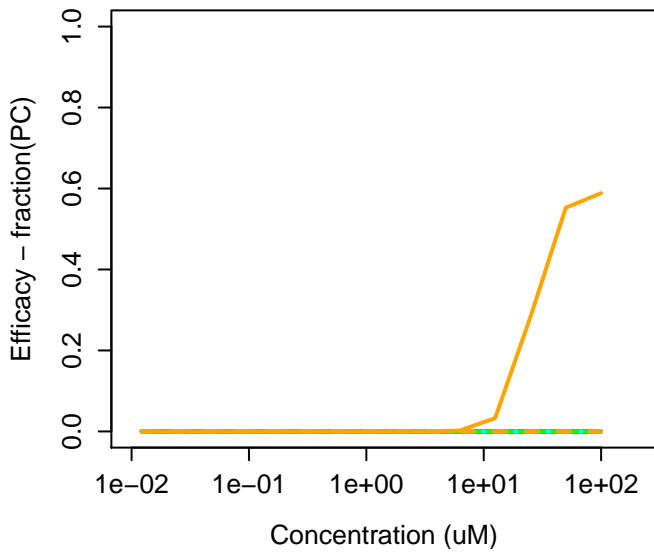

33228-45-4 : 4-Hexylaniline  
Agonist: 0 Antagonist: 0.00011

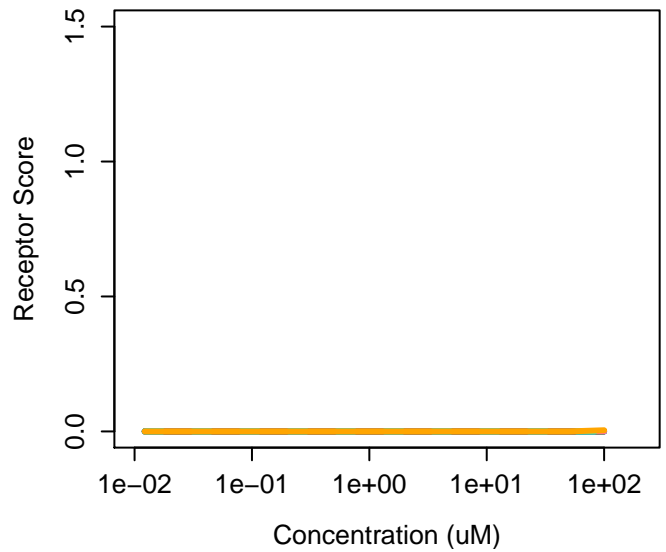

333-41-5 : Diazinon

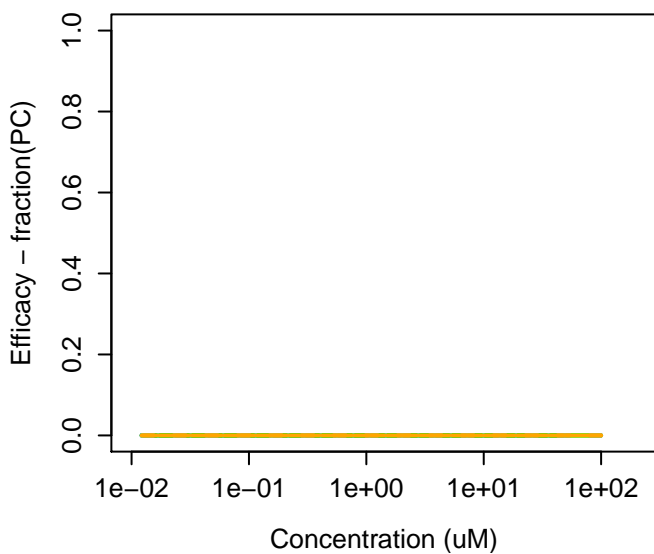

333-41-5 : Diazinon  
Agonist: 0 Antagonist: 0



**3337-71-1 : Asulam**



**3337-71-1 : Asulam  
Agonist: 0 Antagonist: 0**



**334-48-5 : Decanoic acid**

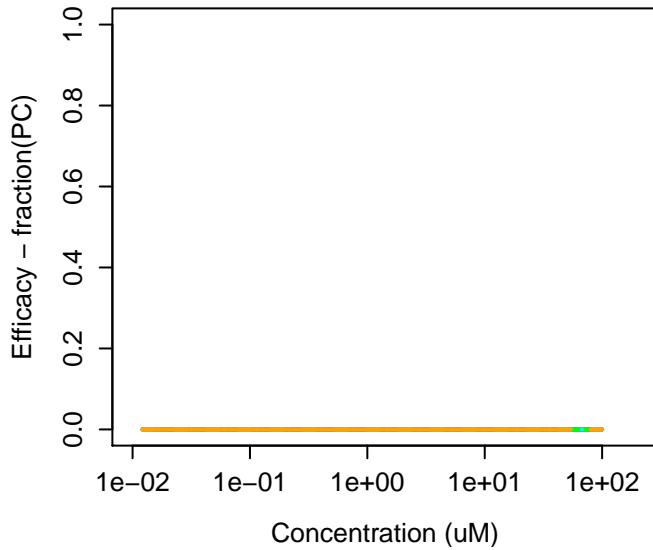

**334-48-5 : Decanoic acid  
Agonist: 0 Antagonist: 0**



**335-67-1 : PFOA**

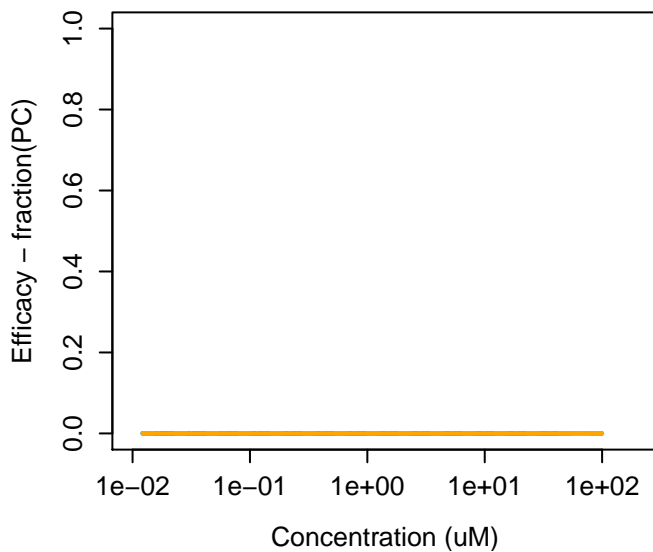

**335-67-1 : PFOA  
Agonist: 0 Antagonist: 0**





335-76-2 : PFDA

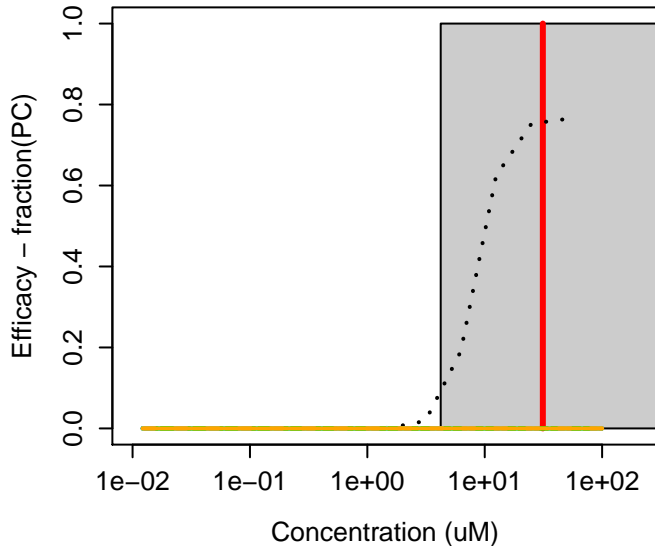

335-76-2 : PFDA  
Agonist: 0 Antagonist: 0

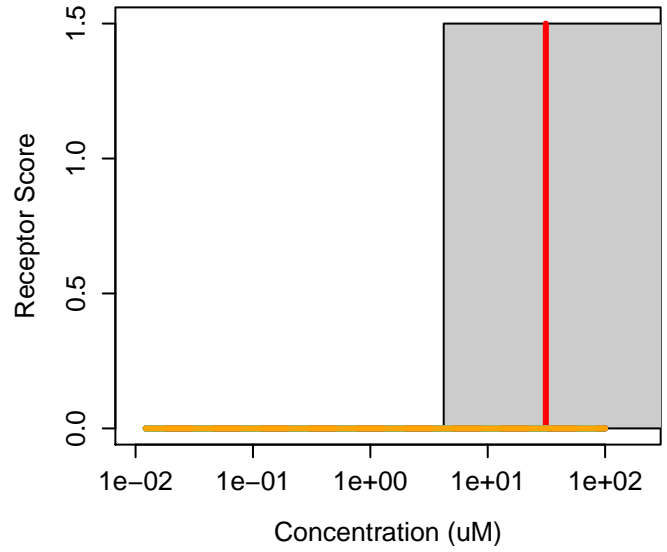

33629-47-9 : Butralin

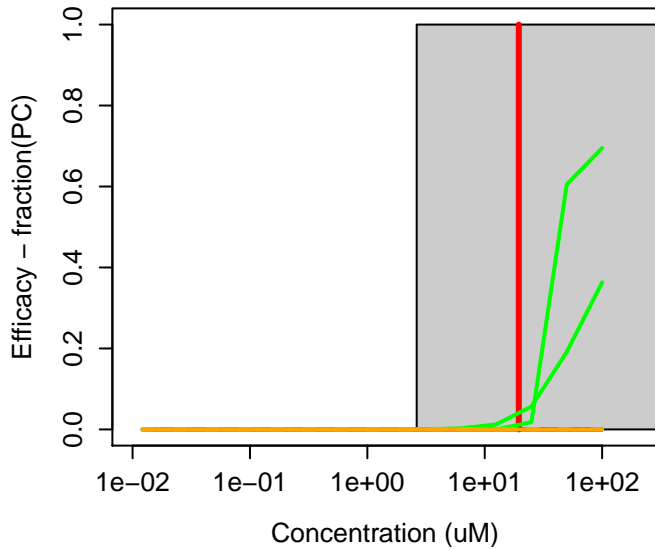

33629-47-9 : Butralin  
Agonist: 0 Antagonist: 0

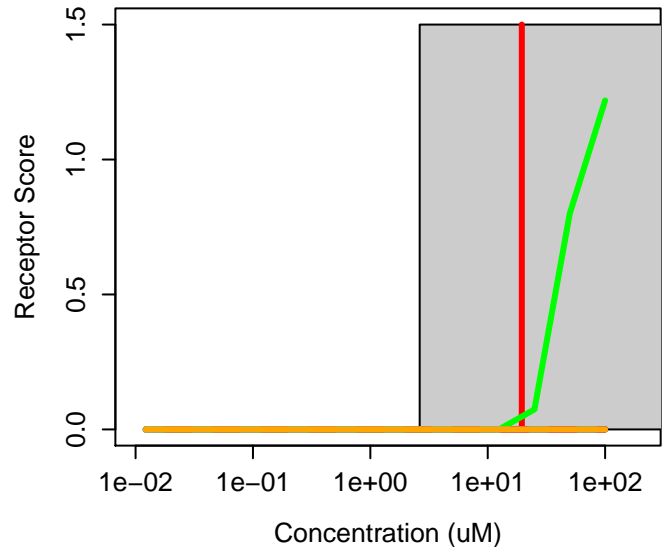

33703-08-1 : Hexanedioic acid, diisononyl ester



33703-08-1 : Hexanedioic acid, diisononyl ester  
Agonist: 0 Antagonist: 0



3380-34-5 : Triclosan

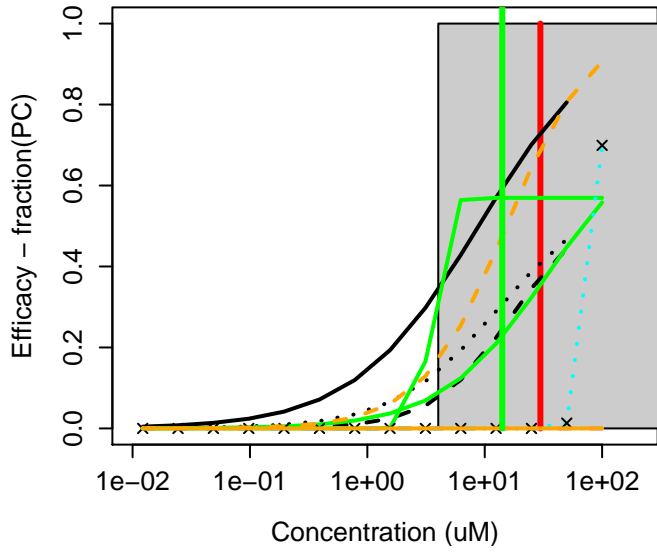

3380-34-5 : Triclosan  
Agonist: 0.039 Antagonist: 0.27

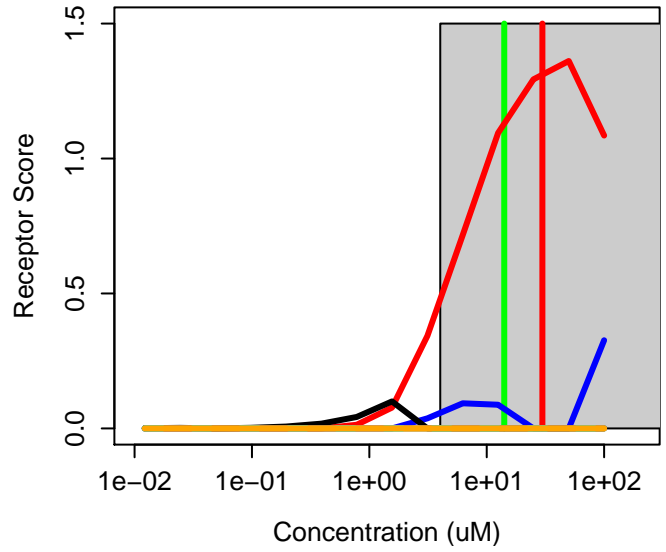

33820-53-0 : Isopropalin

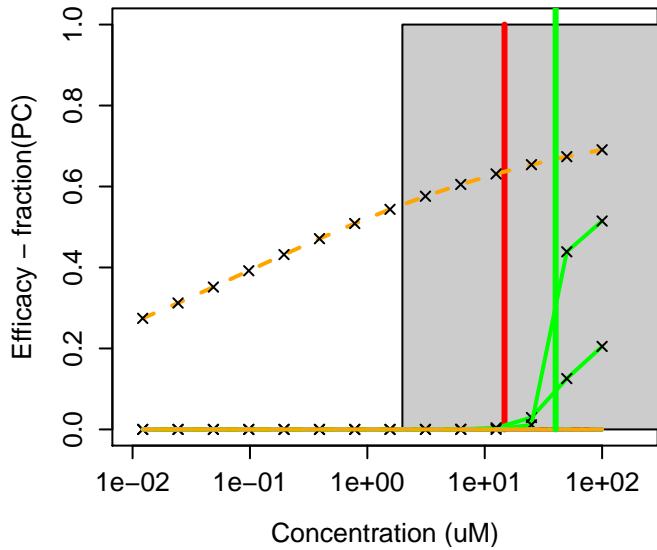

33820-53-0 : Isopropalin  
Agonist: 0 Antagonist: 0.063

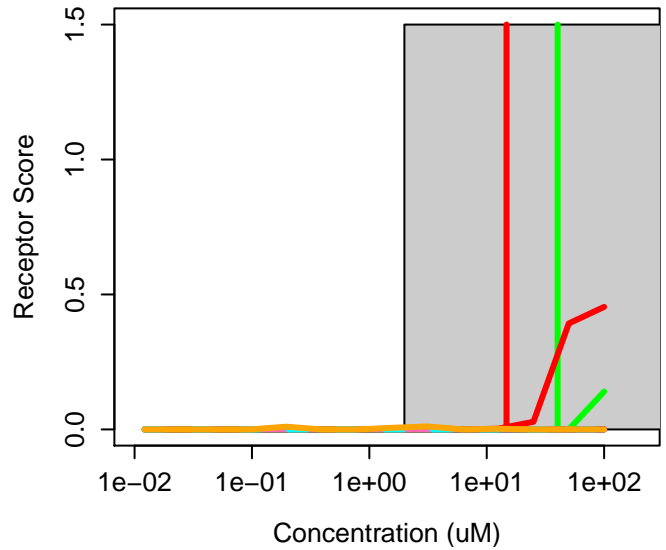

3383-96-8 : Temephos

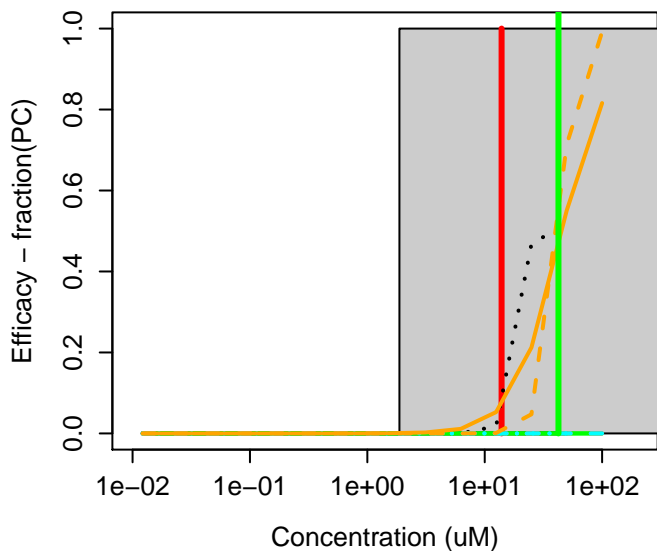

3383-96-8 : Temephos  
Agonist: 0 Antagonist: 0.075

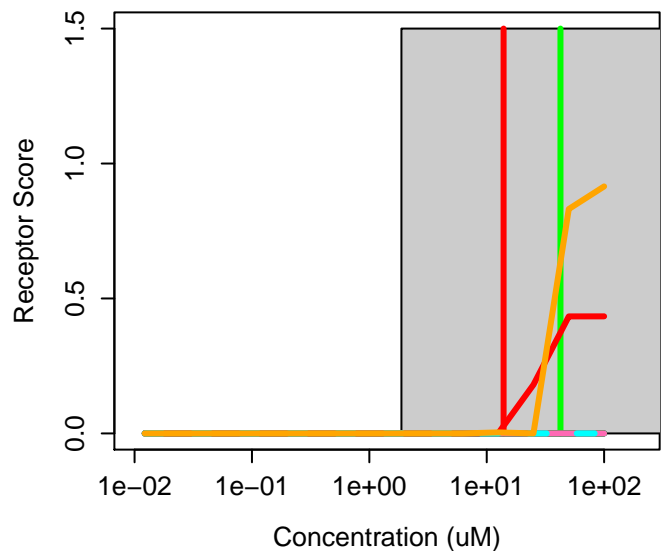

**3391-86-4 : 1-Octen-3-ol**



**3391-86-4 : 1-Octen-3-ol**  
**Agonist: 0 Antagonist: 0**



**33956-49-9 : Codlelure**

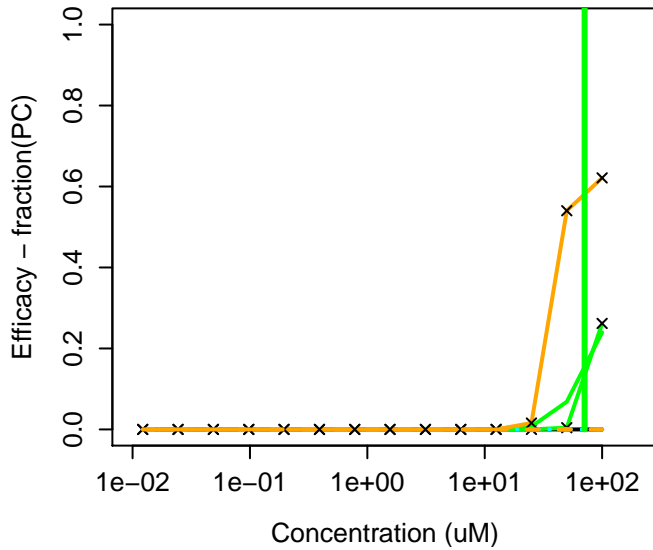

**33956-49-9 : Codlelure**  
**Agonist: 0 Antagonist: 0.029**

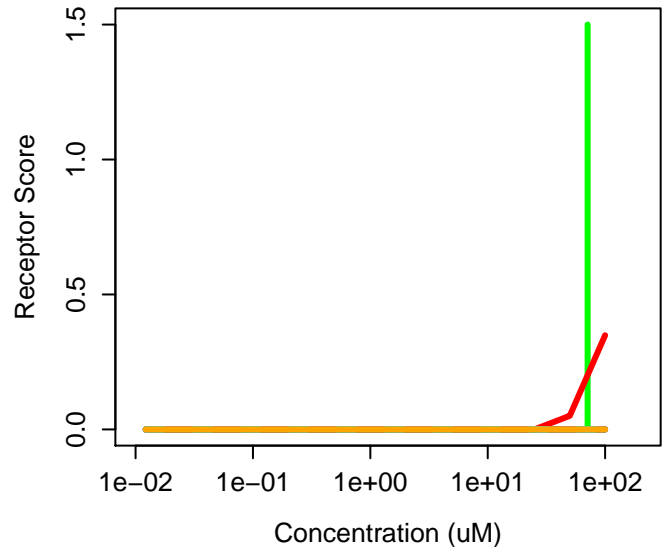

**34014-18-1 : Tebuthiuron**



**34014-18-1 : Tebuthiuron**  
**Agonist: 0 Antagonist: 0**



34256-82-1 : Acetochlor

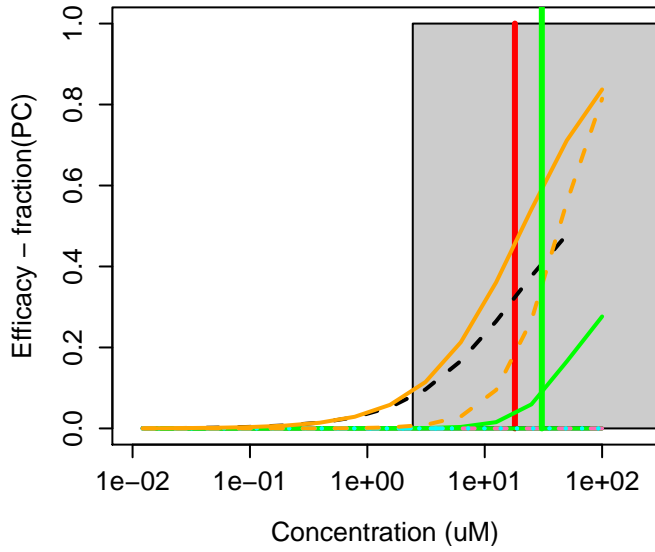

34256-82-1 : Acetochlor  
Agonist: 0 Antagonist: 0.13

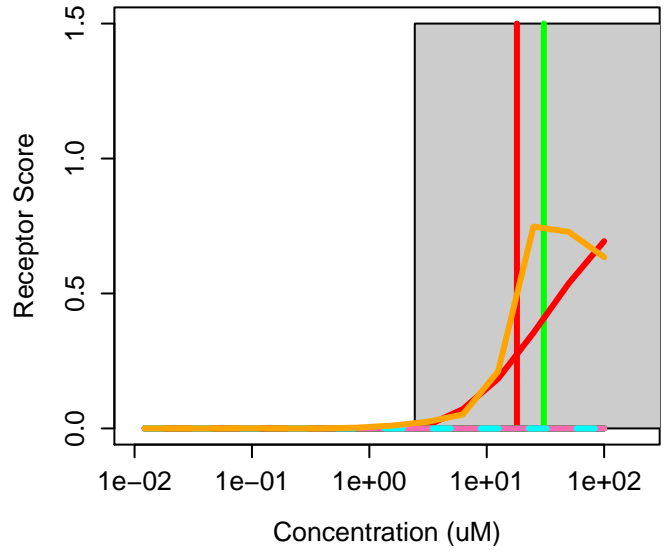

34451-19-9 : Butyl (2S)-2-hydroxypropanoate



34451-19-9 : Butyl (2S)-2-hydroxypropanoate  
Agonist: 0 Antagonist: 0



344930-95-6 : SSR69071

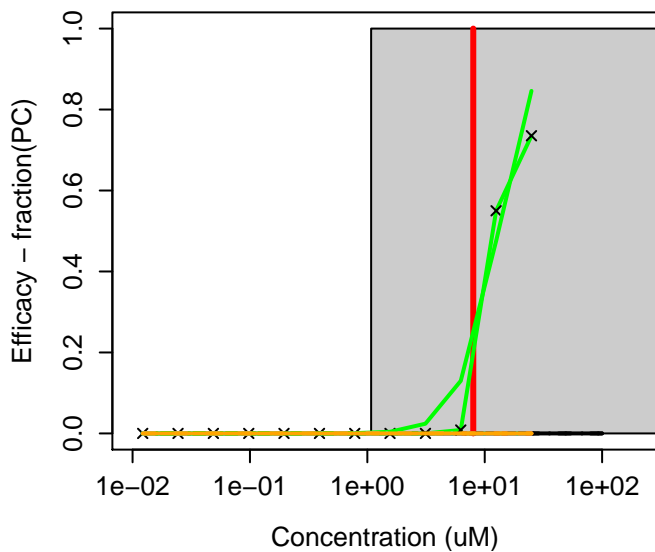

344930-95-6 : SSR69071  
Agonist: 3e-05 Antagonist: 0.00041

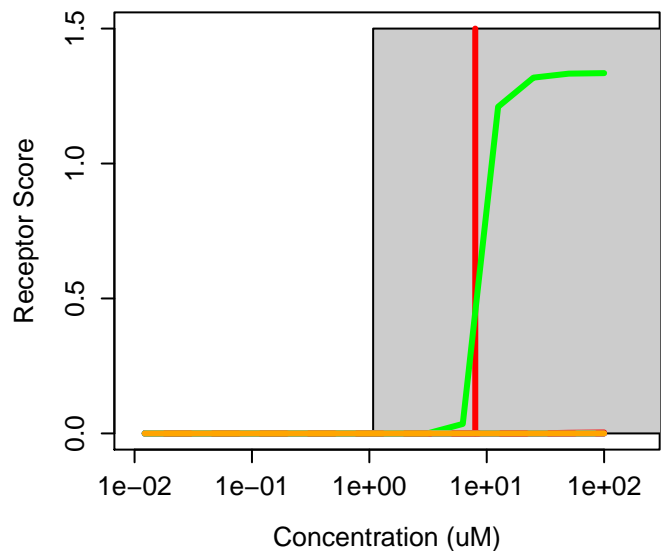

3452-97-9 : 3,5,5-Trimethyl-1-hexanol



3452-97-9 : 3,5,5-Trimethyl-1-hexanol  
Agonist: 0 Antagonist: 0



34590-94-8 : Dipropylene glycol monomethyl ethyl ether

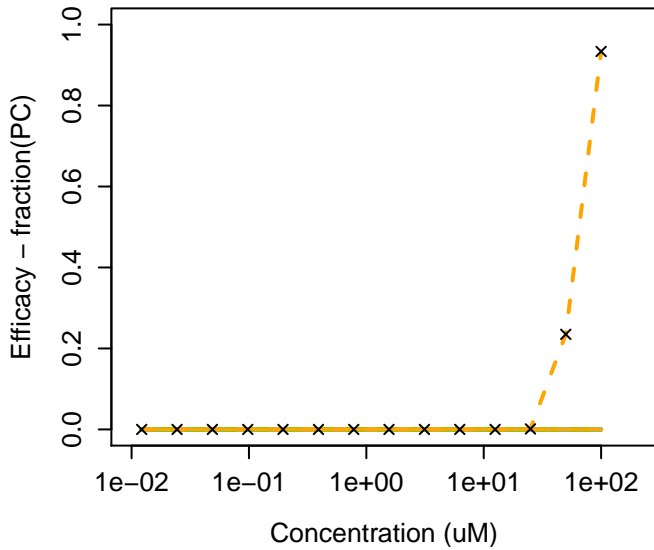

34590-94-8 : Dipropylene glycol monomethyl ethyl ether  
Agonist: 0 Antagonist: 0



349495-42-7 : PharmaGSID\_47263

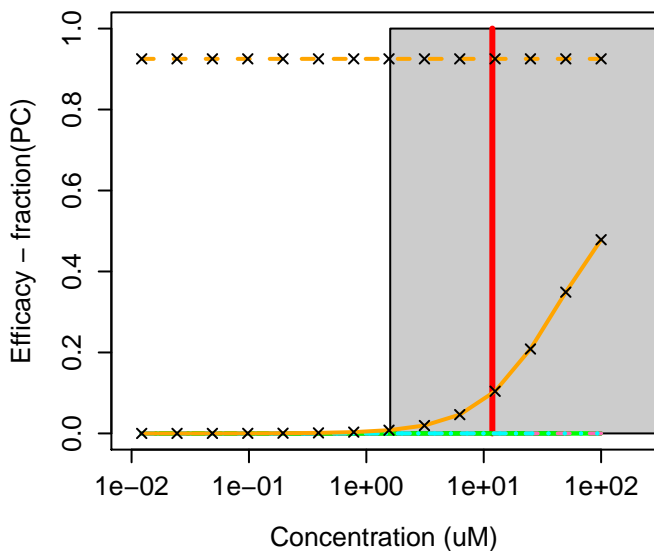

349495-42-7 : PharmaGSID\_47263  
Agonist: 0 Antagonist: 0.00014

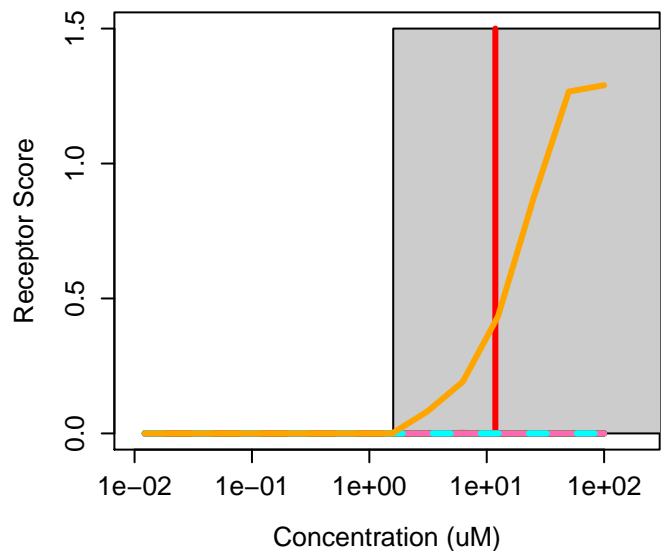

35256-85-0 : Butam



35256-85-0 : Butam  
Agonist: 0 Antagonist: 0



353280-07-6 : CP-612372

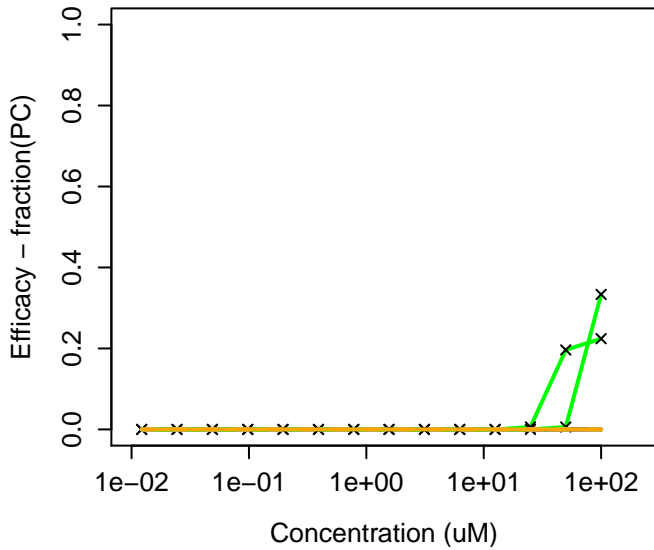

353280-07-6 : CP-612372  
Agonist: 0 Antagonist: 0

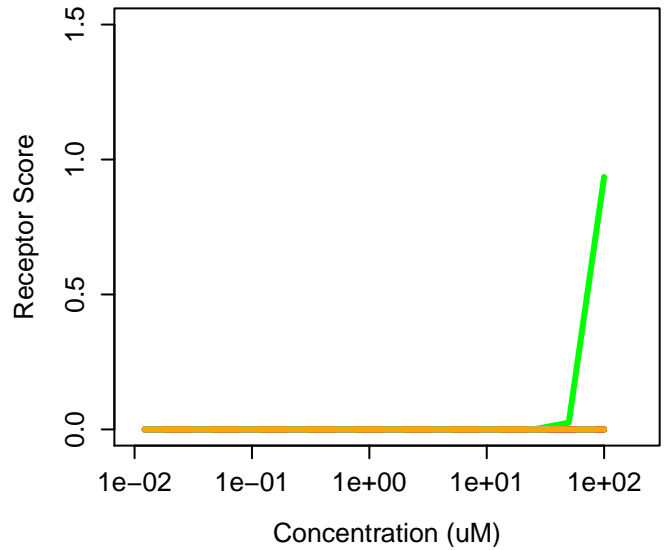

35367-38-5 : Diflubenzuron

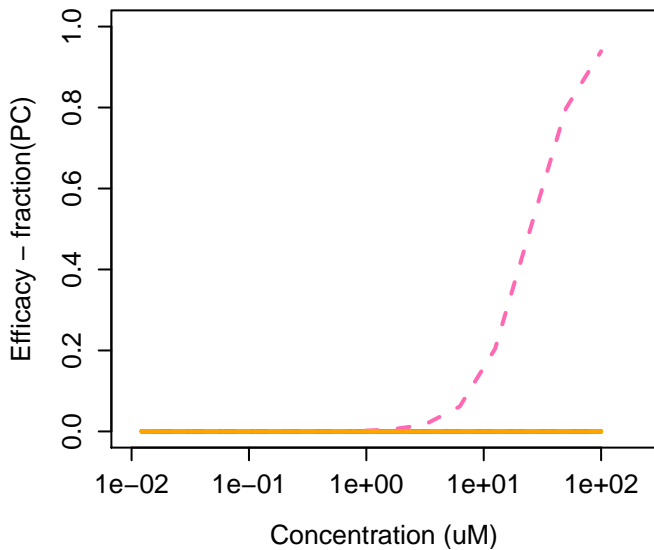

35367-38-5 : Diflubenzuron  
Agonist: 0 Antagonist: 0

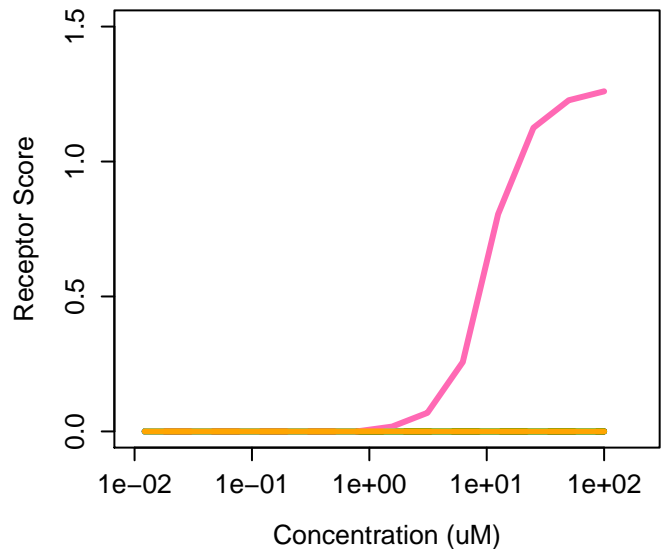

35400-43-2 : Sulprofos



35400-43-2 : Sulprofos  
Agonist: 0 Antagonist: 0



3547-33-9 : 2-Hydroxyethyl octyl sulfide



3547-33-9 : 2-Hydroxyethyl octyl sulfide  
Agonist: 0 Antagonist: 0



35554-44-0 : Imazalil

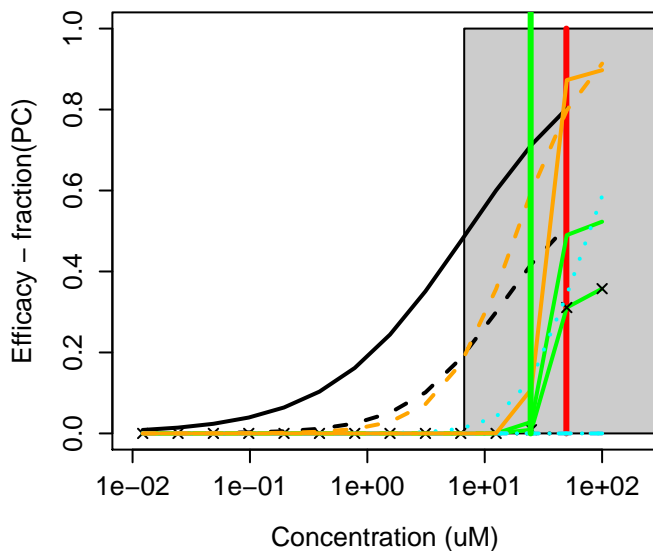

35554-44-0 : Imazalil  
Agonist: 0 Antagonist: 0.3

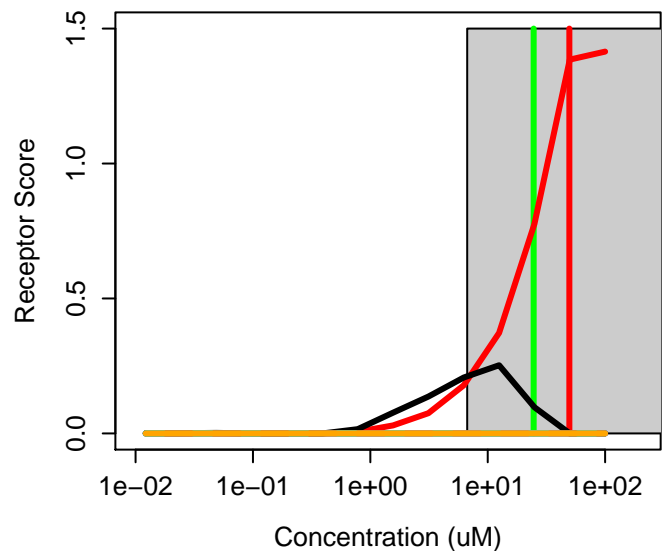

35575-96-3 : Azamethiphos

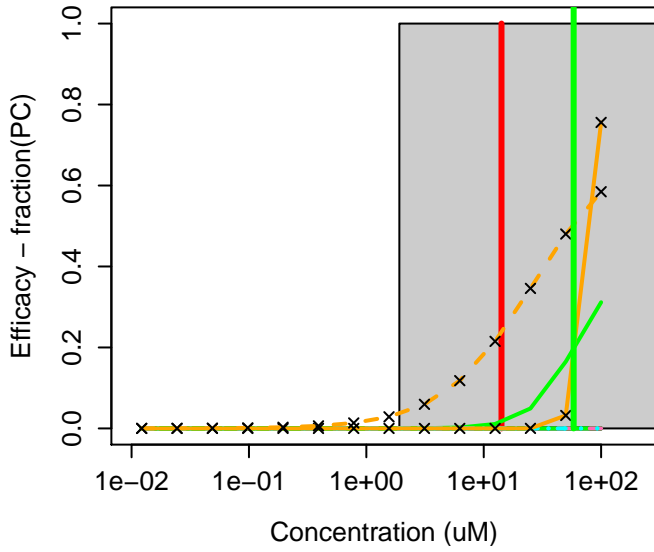

35575-96-3 : Azamethiphos  
Agonist: 0 Antagonist: 0.031

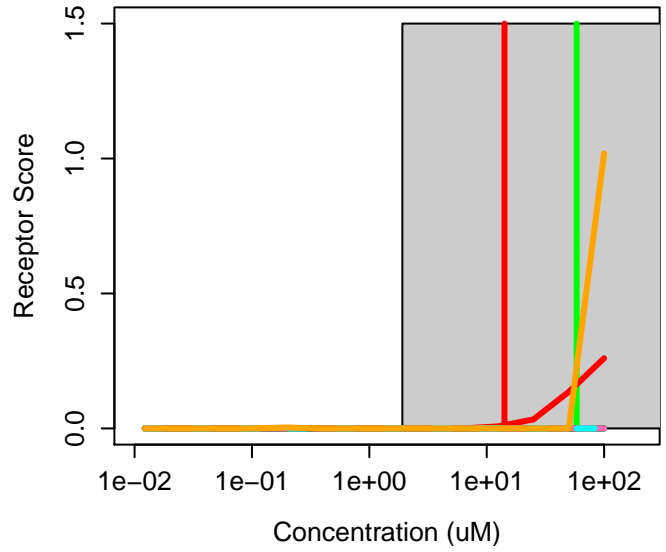

35691-65-7 : 1,2-Dibromo-2,4-dicyanobutane

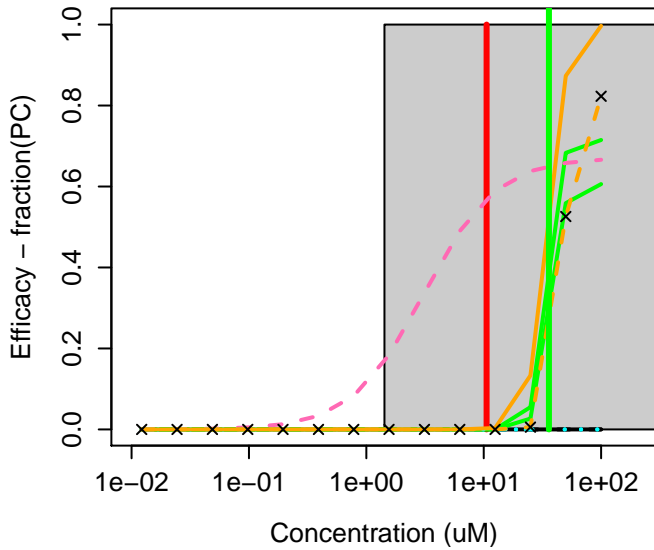

35691-65-7 : 1,2-Dibromo-2,4-dicyanobutane  
Agonist: 0.0031 Antagonist: 0.15

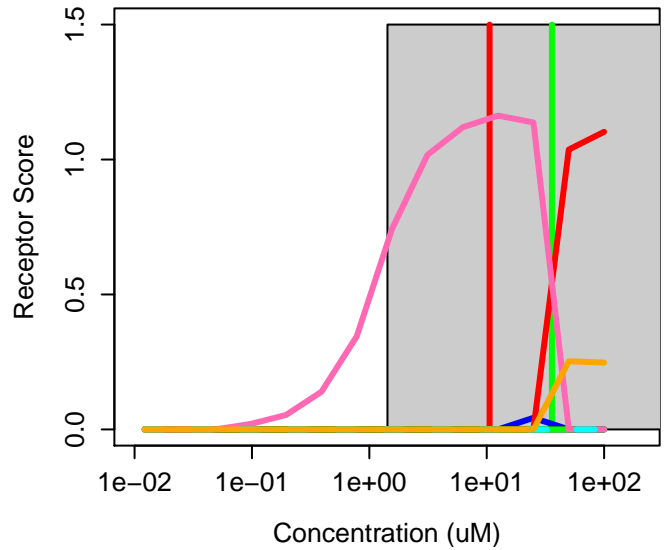

361343-19-3 : Elzasonan

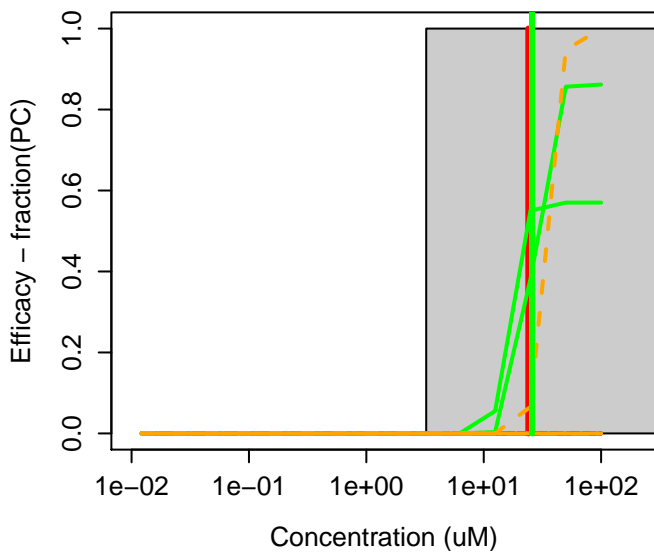

361343-19-3 : Elzasonan  
Agonist: 0 Antagonist: 0.12

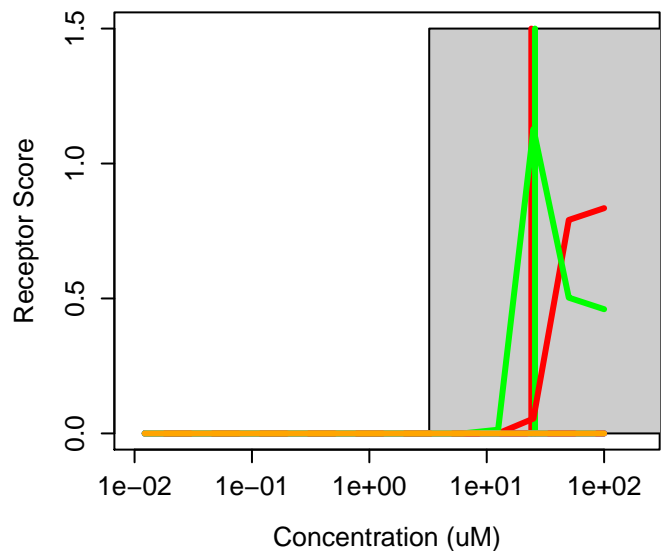



**361377-29-9 : Fluoxastrobin**

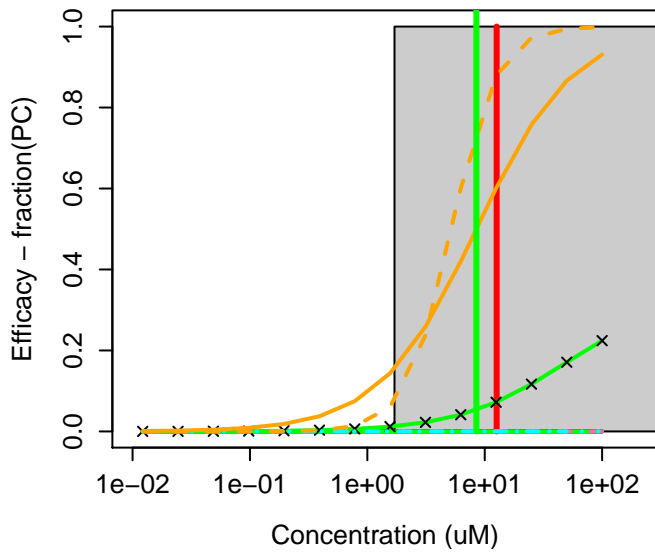

**361377-29-9 : Fluoxastrobin**  
**Agonist: 0 Antagonist: 0.039**

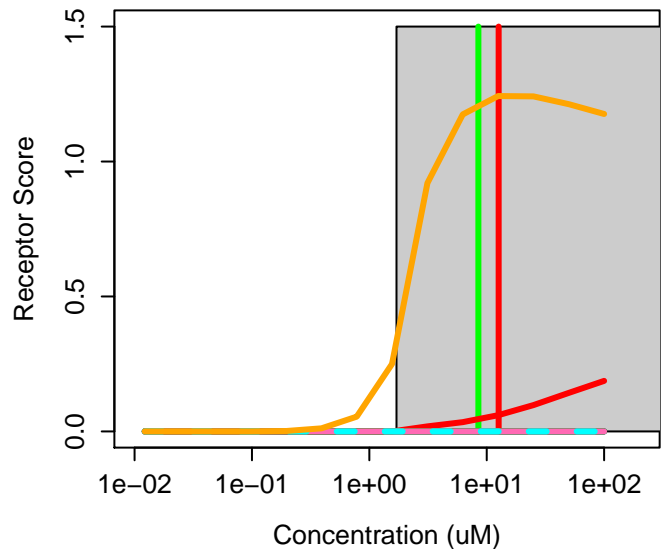

**3622-84-2 : N-Butylbenzenesulfonamide**



**3622-84-2 : N-Butylbenzenesulfonamide**  
**Agonist: 0 Antagonist: 0**



**3653-48-3 : MCPA-sodium**



**3653-48-3 : MCPA-sodium**  
**Agonist: 0 Antagonist: 0**



**36631-30-8 : Triisodecyl trimellitate**



**36631-30-8 : Triisodecyl trimellitate  
Agonist: 0 Antagonist: 0**



**36653-82-4 : 1-Hexadecanol**



**36653-82-4 : 1-Hexadecanol  
Agonist: 0 Antagonist: 0**



**36673-16-2 : Isopropyl triethanolamine titanate**



**36673-16-2 : Isopropyl triethanolamine titanate  
Agonist: 0 Antagonist: 0**



**36734-19-7 : Iprodione**



**36734-19-7 : Iprodione  
Agonist: 0 Antagonist: 0**



**3681-71-8 : (3Z)-3-Hexenyl acetate**



**3681-71-8 : (3Z)-3-Hexenyl acetate  
Agonist: 0 Antagonist: 0**



**368832-42-2 : CP-728663**

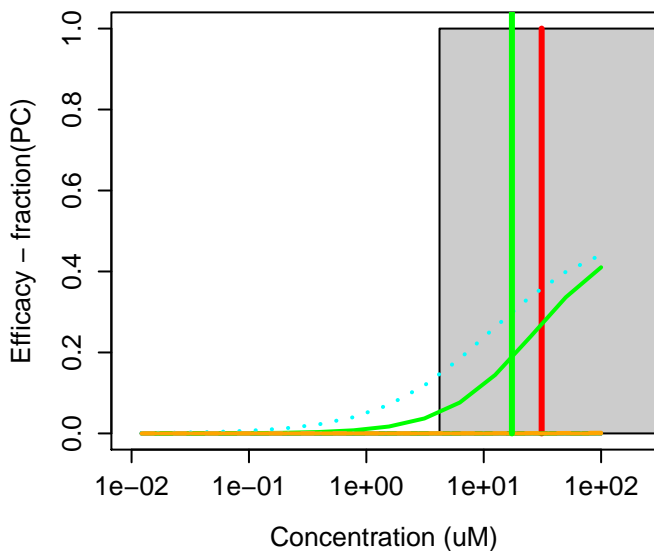

**368832-42-2 : CP-728663  
Agonist: 0.032 Antagonist: 0**

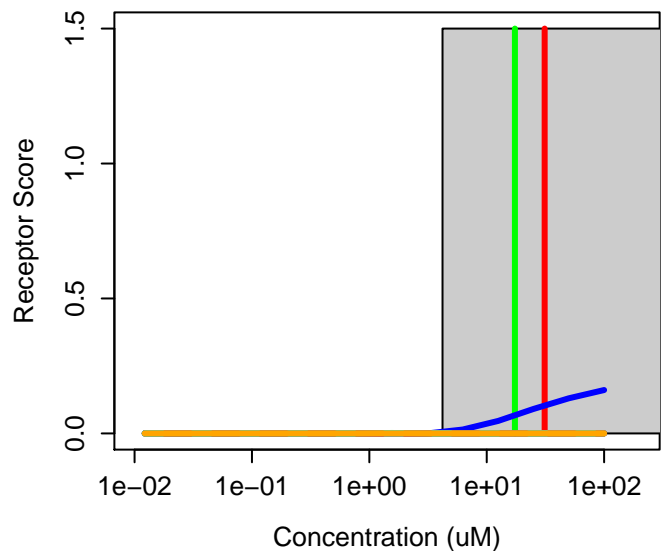

**3691-35-8 : Chlorophacinone**

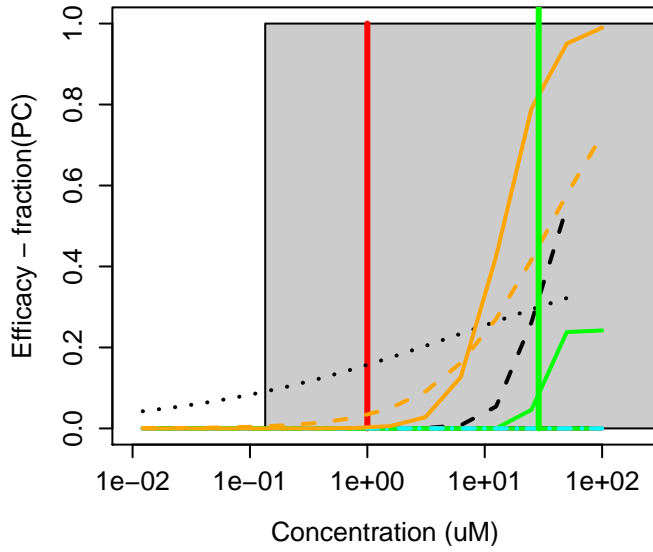

**3691-35-8 : Chlorophacinone  
Agonist: 0 Antagonist: 0.2**

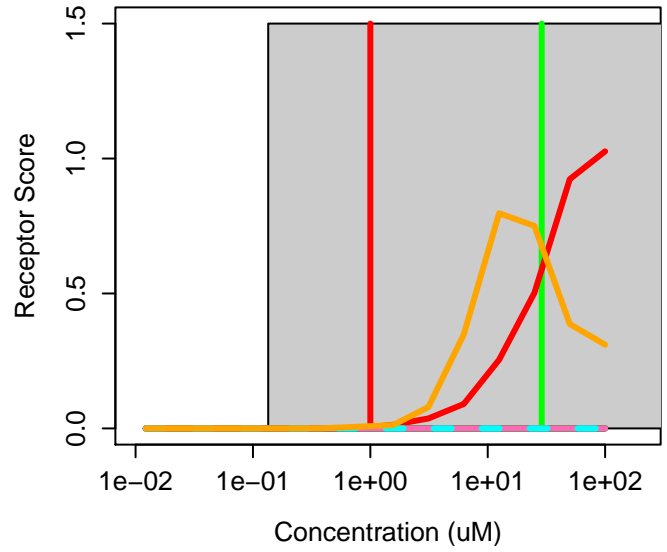

**3734-33-6 : Denatonium benzoate**

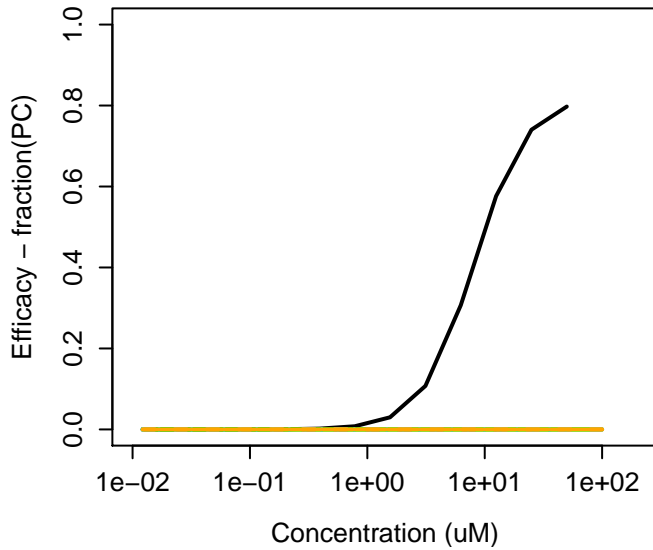

**3734-33-6 : Denatonium benzoate  
Agonist: 0 Antagonist: 0**

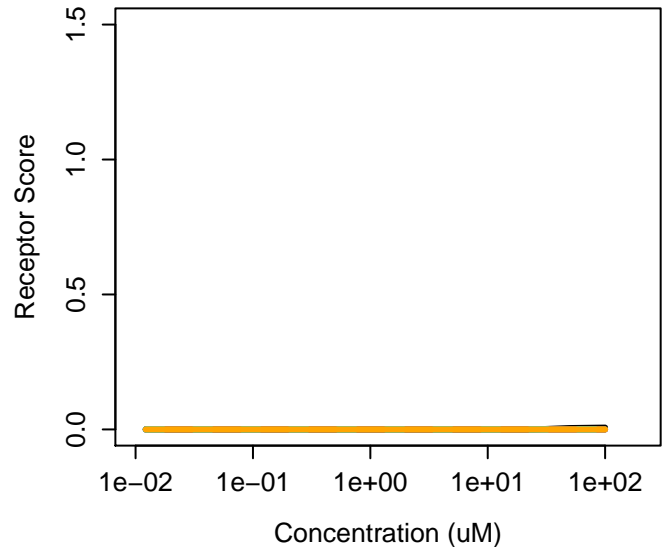

**3734-67-6 : C.I. Acid Red 1**

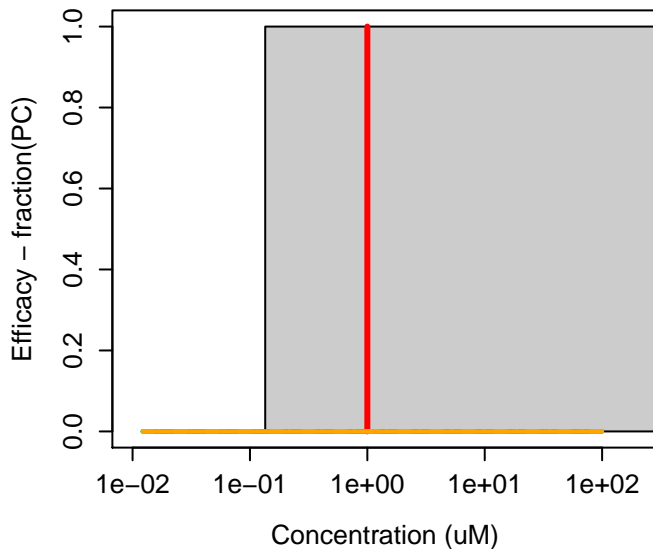

**3734-67-6 : C.I. Acid Red 1  
Agonist: 0 Antagonist: 0**

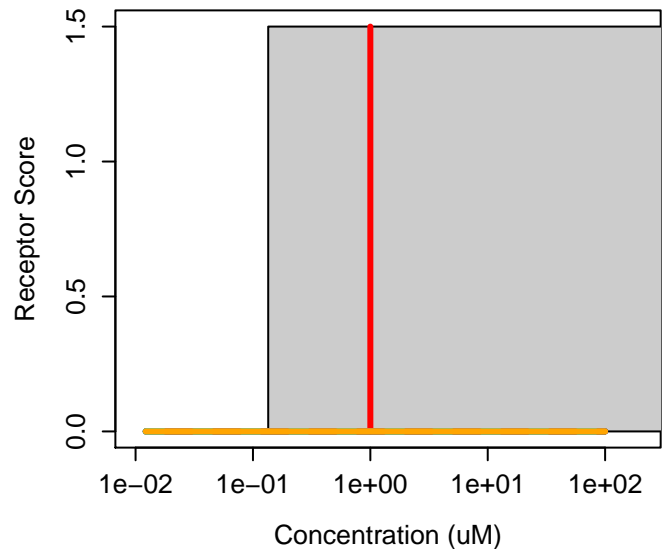

**3739-38-6 : 3-Phenoxybenzoic acid**



**3739-38-6 : 3-Phenoxybenzoic acid  
Agonist: 0 Antagonist: 0**



**375-85-9 : Perfluoroheptanoic acid**



**375-85-9 : Perfluoroheptanoic acid  
Agonist: 0 Antagonist: 0**



**375-95-1 : PFNA**

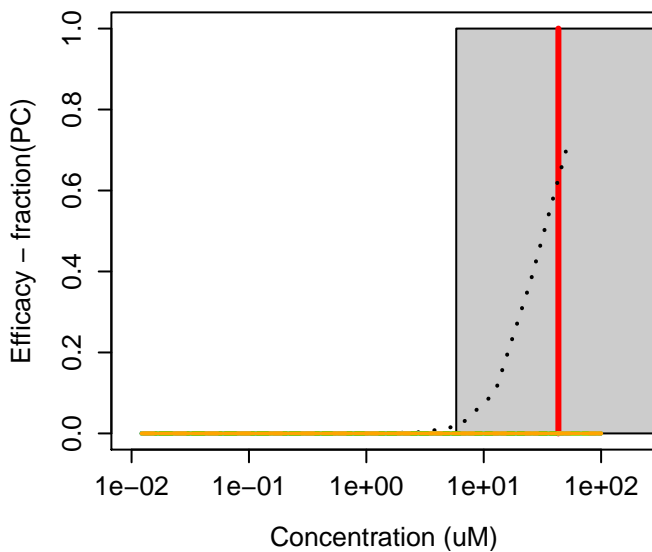

**375-95-1 : PFNA  
Agonist: 0 Antagonist: 0**

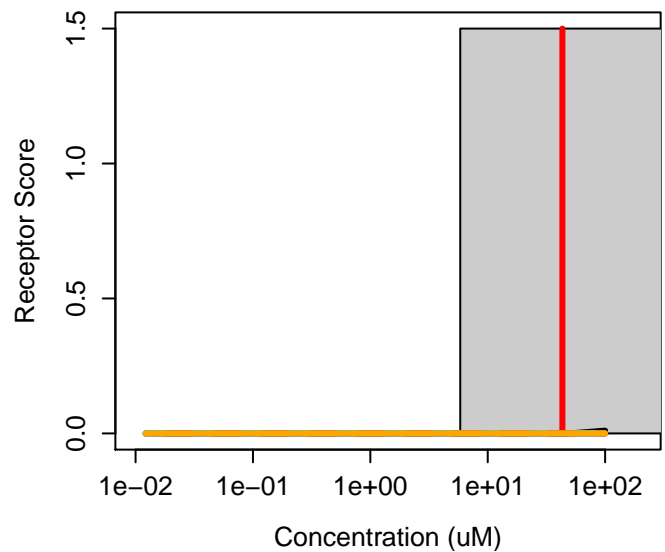

37764-25-3 : Dichlormid



37764-25-3 : Dichlormid  
Agonist: 0 Antagonist: 0



3811-04-9 : Potassium chlorate

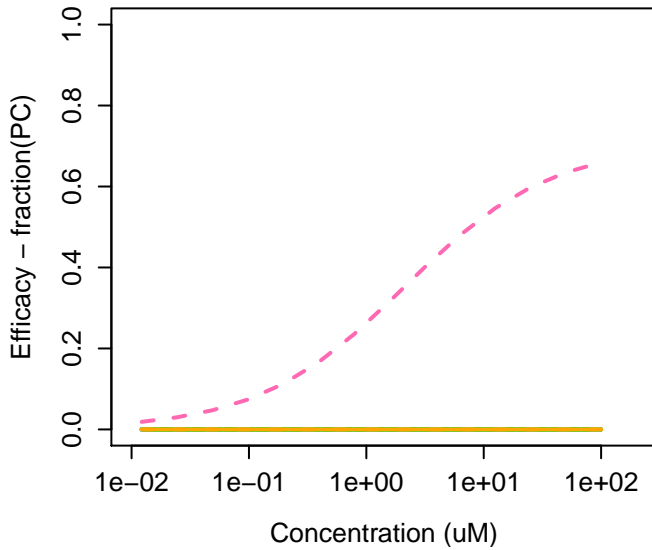

3811-04-9 : Potassium chlorate  
Agonist: 0 Antagonist: 0

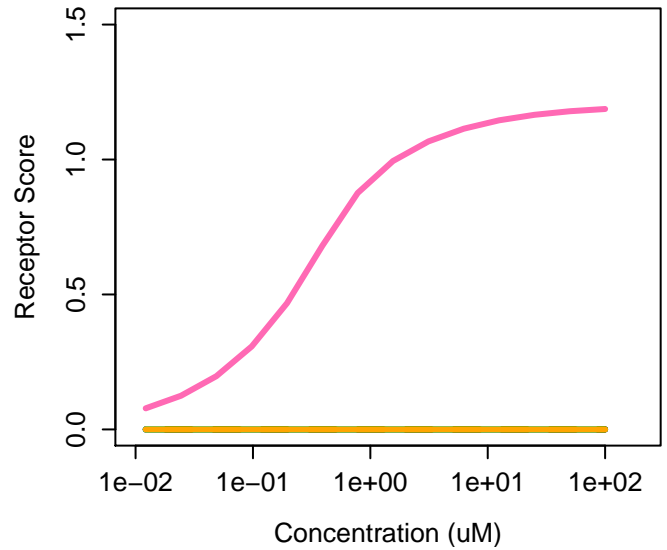

3811-73-2 : Sodium (2-pyridylthio)-N-oxide

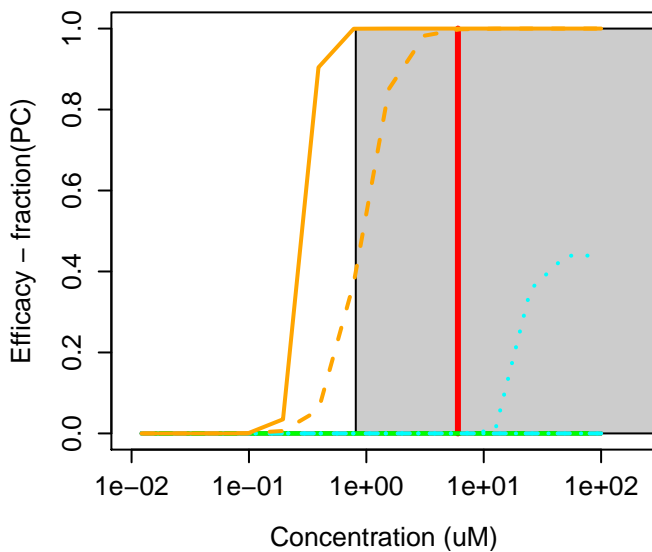

3811-73-2 : Sodium (2-pyridylthio)-N-oxide  
Agonist: 0 Antagonist: 0.001

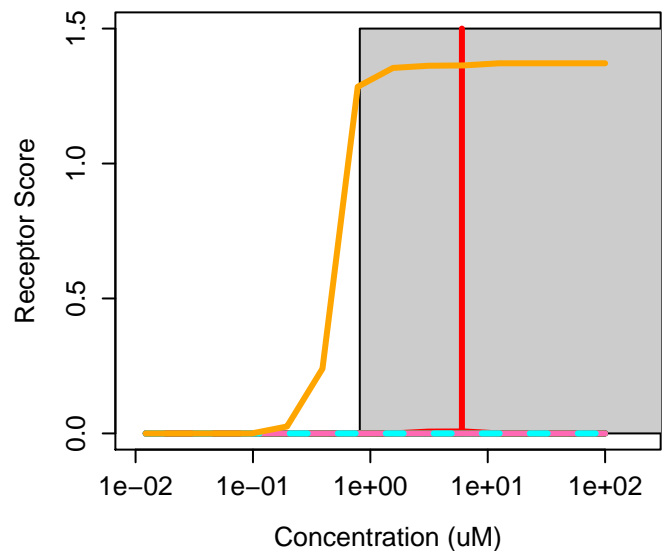

3825-26-1 : PFOA, ammonium salt

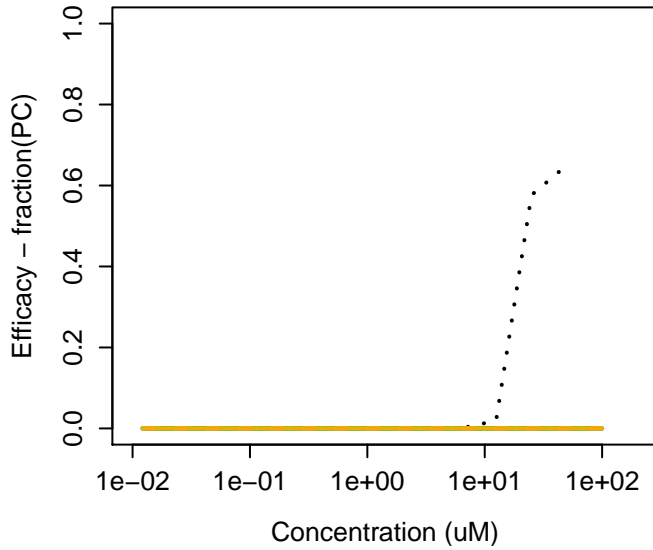

3825-26-1 : PFOA, ammonium salt  
Agonist: 0 Antagonist: 0

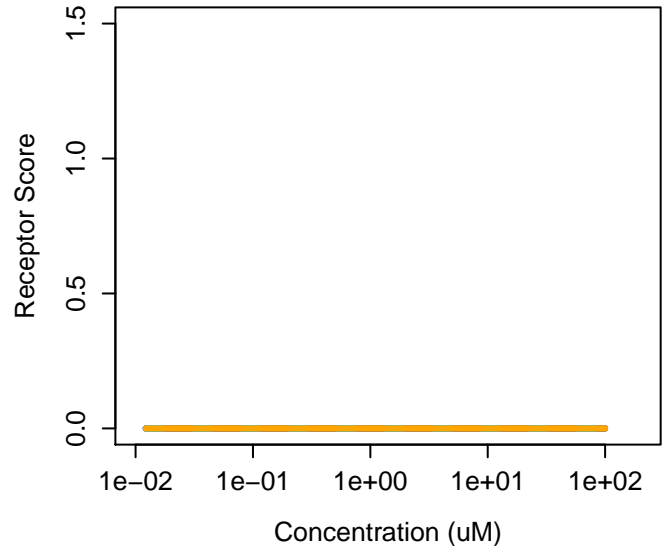

3844-45-9 : FD&C Blue No. 1

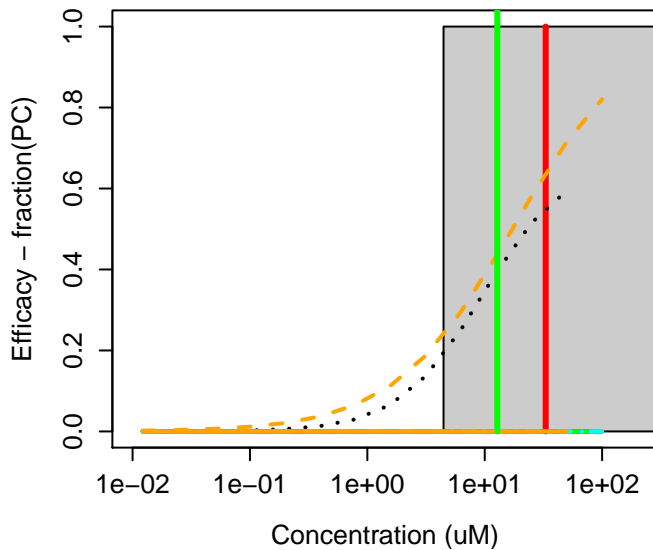

3844-45-9 : FD&C Blue No. 1  
Agonist: 0 Antagonist: 0.11

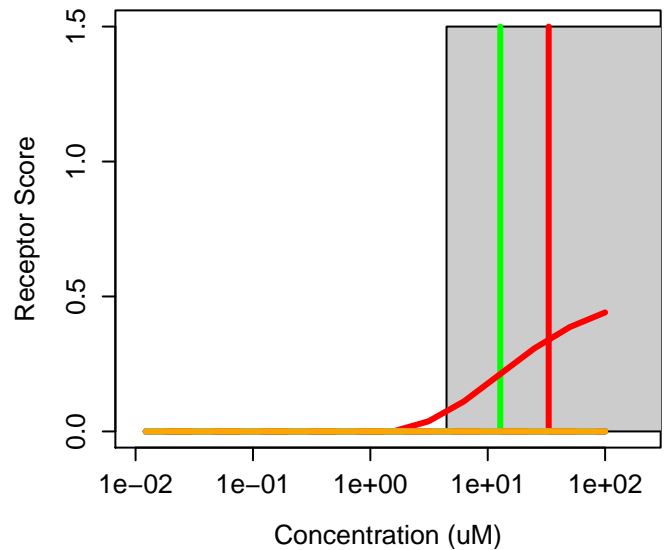

3855-32-1 : 2,6,10-Trimethyl-2,6,10-triazaundeca

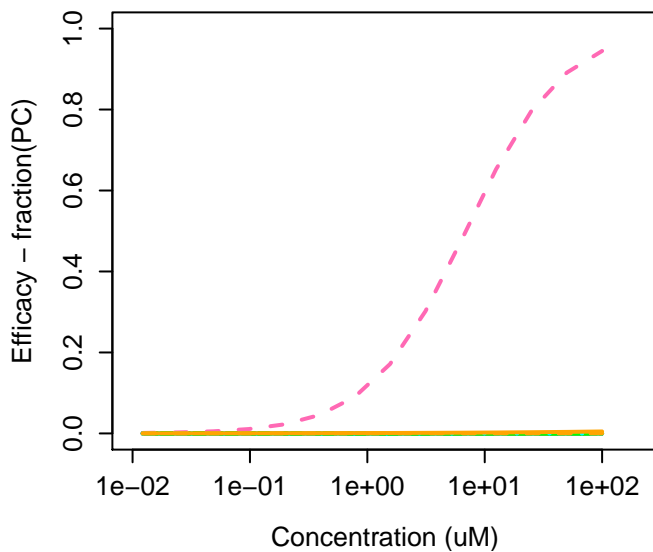

3855-32-1 : 2,6,10-Trimethyl-2,6,10-triazaundeca  
Agonist: 0 Antagonist: 0

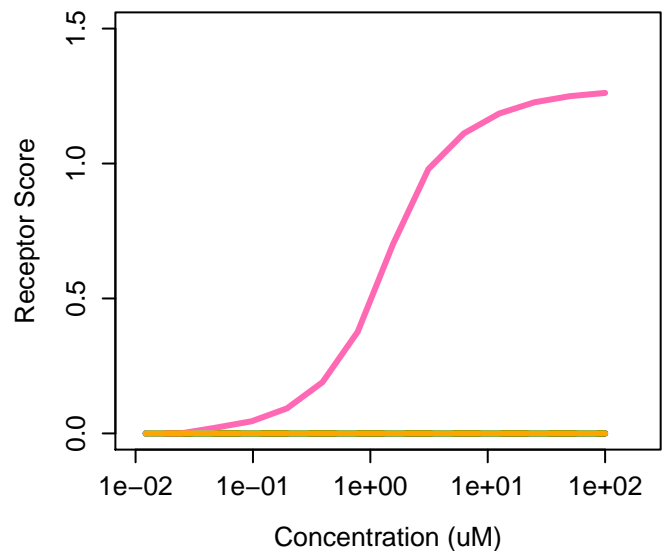

**3871-99-6 : PFHS-K**



**3871-99-6 : PFHS-K**  
**Agonist: 0 Antagonist: 0**



**3913-02-8 : 2-Butyloctan-1-ol**



**3913-02-8 : 2-Butyloctan-1-ol**  
**Agonist: 0 Antagonist: 0**



**39236-46-9 : Imidazolidinyl urea**



**39236-46-9 : Imidazolidinyl urea**  
**Agonist: 0 Antagonist: 0**





3926-62-3 : Sodium chloroacetate



3926-62-3 : Sodium chloroacetate  
Agonist: 0 Antagonist: 0



39300-45-3 : Dinocap

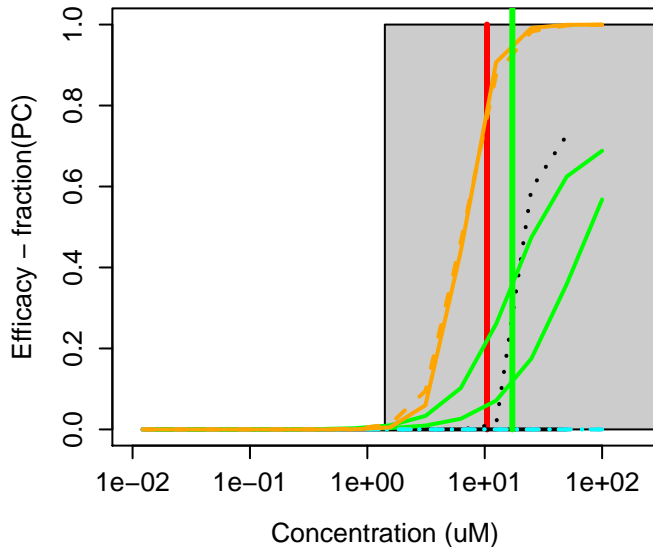

39300-45-3 : Dinocap  
Agonist: 0 Antagonist: 0.3

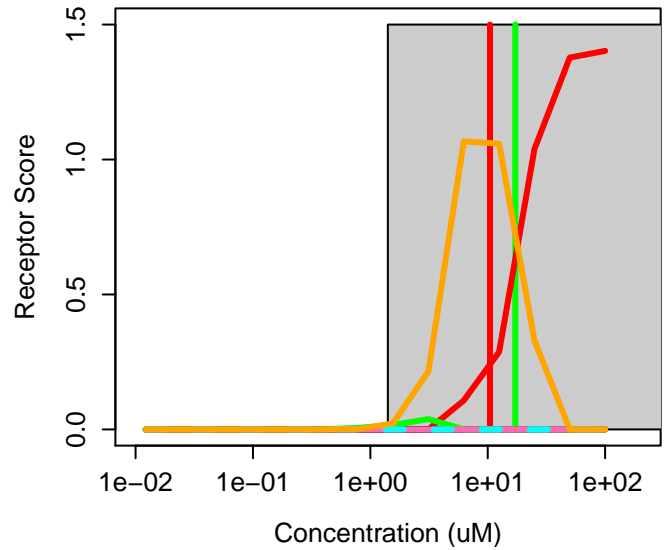

39515-41-8 : Fenpropathrin

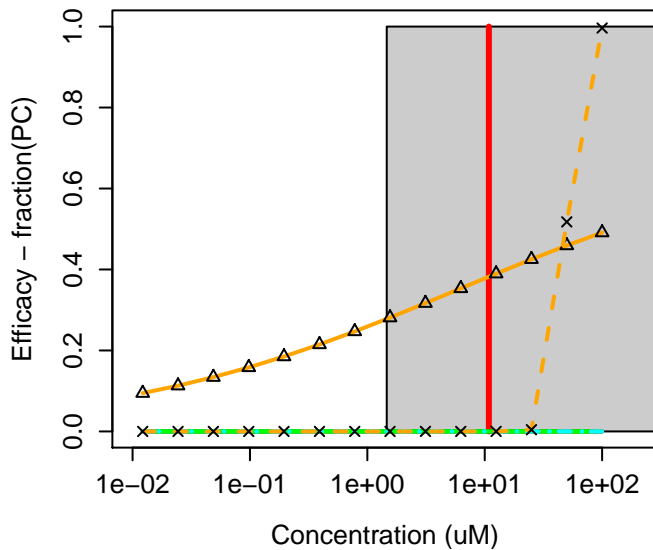

39515-41-8 : Fenpropathrin  
Agonist: 0 Antagonist: 0

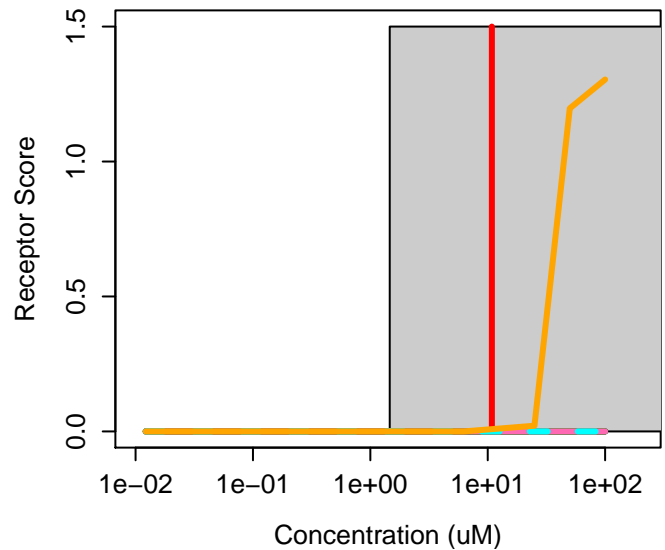

**39905-57-2 : 4-Hexyloxyaniline**

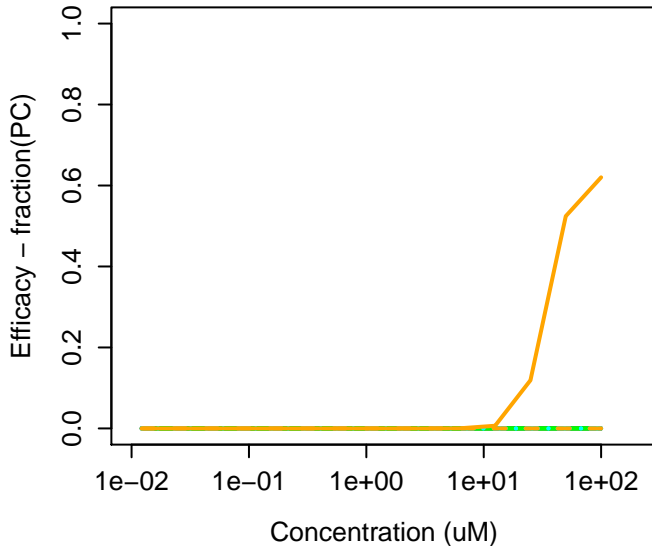

**39905-57-2 : 4-Hexyloxyaniline  
Agonist: 0 Antagonist: 0**



**402910-27-4 : UK-416244**

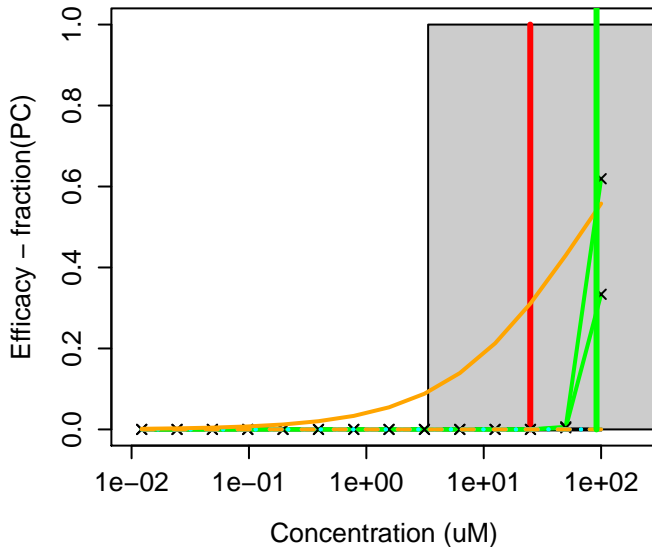

**402910-27-4 : UK-416244  
Agonist: 0 Antagonist: 0.032**

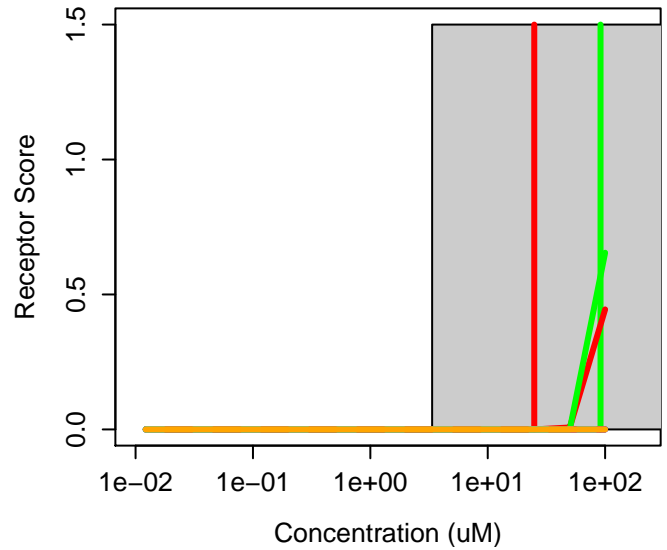

**40487-42-1 : Pendimethalin**

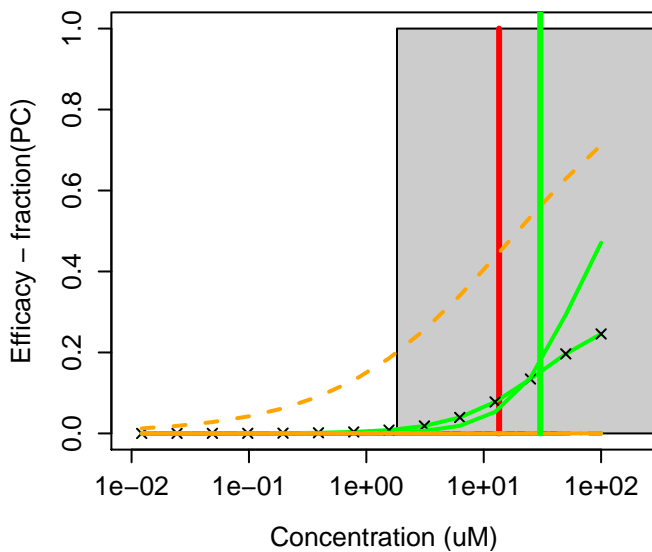

**40487-42-1 : Pendimethalin  
Agonist: 0 Antagonist: 0.082**

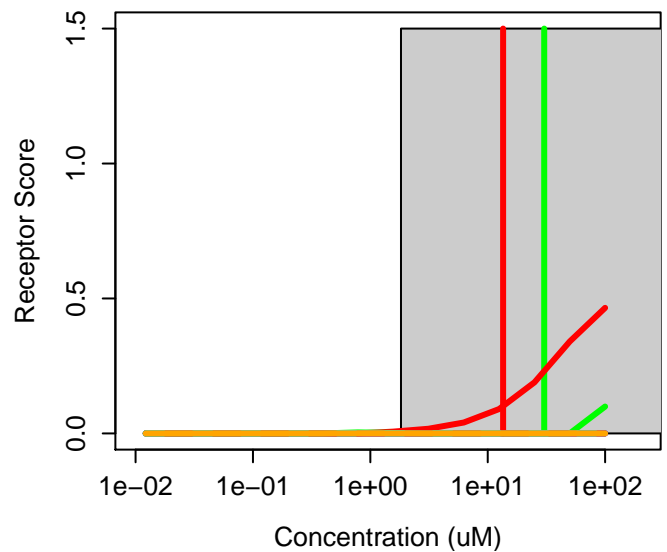

**40649-36-3 : 4-Propylcyclohexanone**



**40649-36-3 : 4-Propylcyclohexanone  
Agonist: 0 Antagonist: 0**



**4065-45-6 : Sulisobenzone**

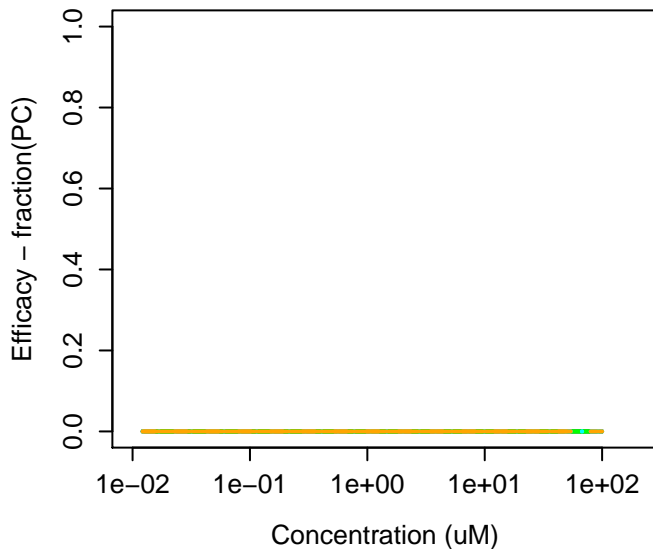

**4065-45-6 : Sulisobenzone  
Agonist: 0 Antagonist: 0**



**4098-71-9 : Isophorone diisocyanate**

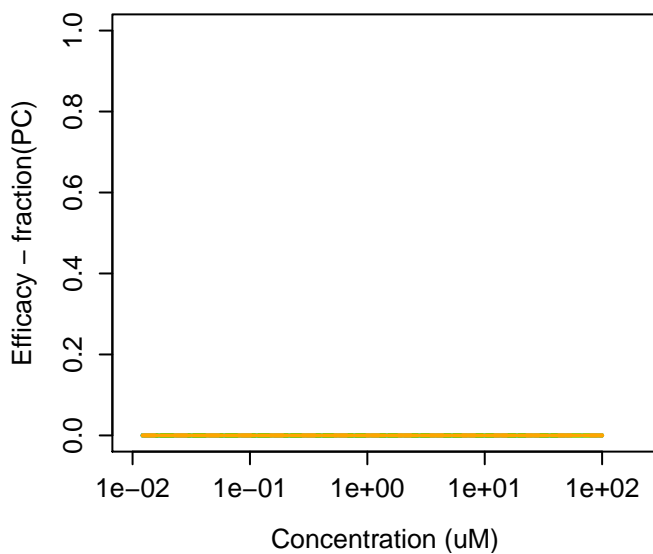

**4098-71-9 : Isophorone diisocyanate  
Agonist: 0 Antagonist: 0**



4107-98-6 : N,N-Diisopropylaniline



4107-98-6 : N,N-Diisopropylaniline  
Agonist: 0 Antagonist: 0



41198-08-7 : Profenofos

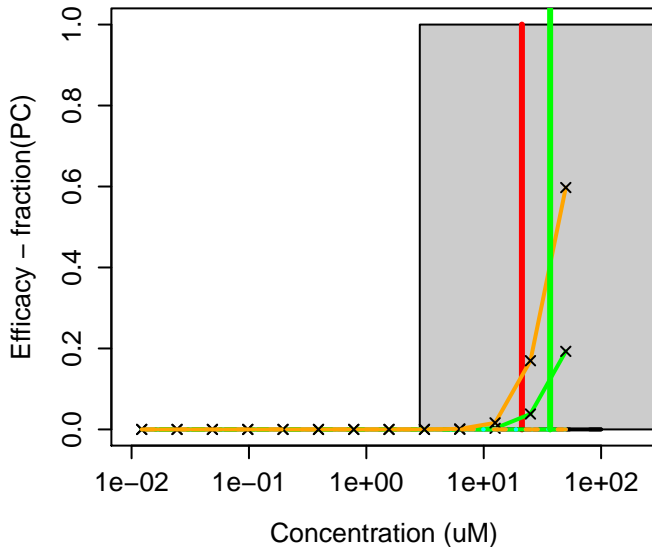

41198-08-7 : Profenofos  
Agonist: 0 Antagonist: 0.023

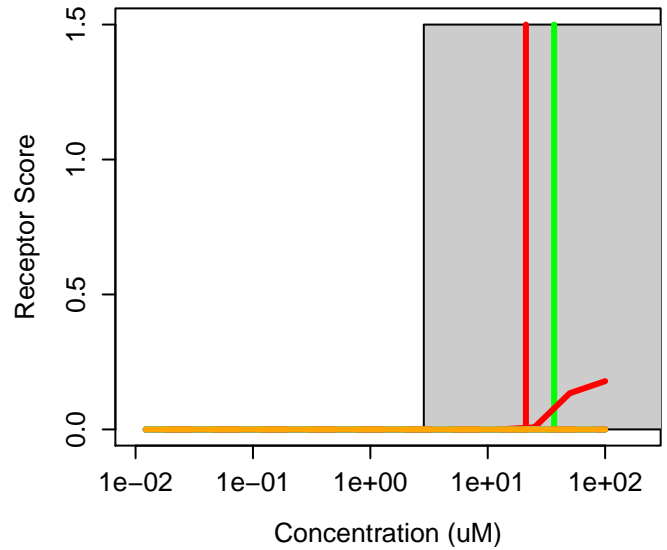

4130-42-1 : 2,6-Di-tert-butyl-4-ethylphenol

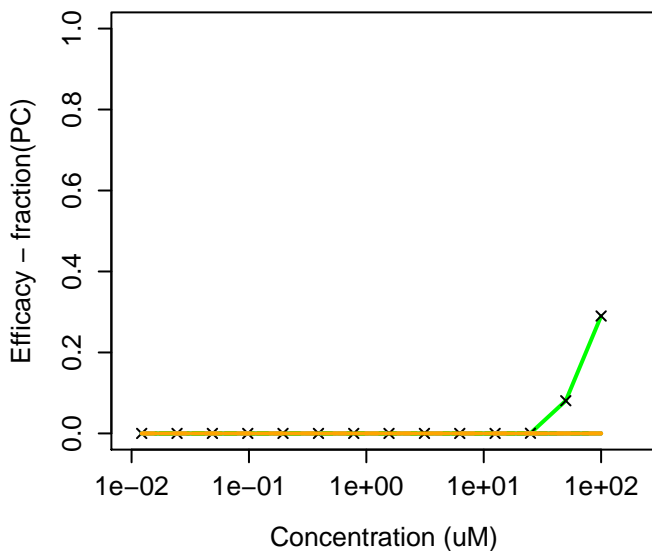

4130-42-1 : 2,6-Di-tert-butyl-4-ethylphenol  
Agonist: 0 Antagonist: 0



41372-08-1 : Methyldopa sesquihydrate

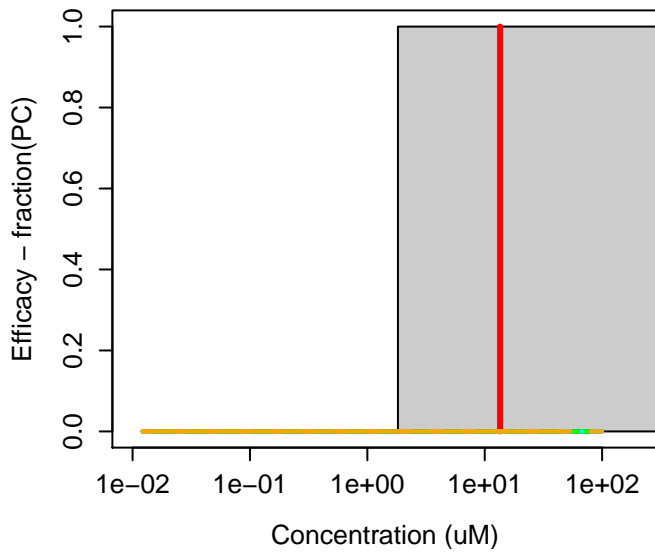

41372-08-1 : Methyldopa sesquihydrate  
Agonist: 0 Antagonist: 0

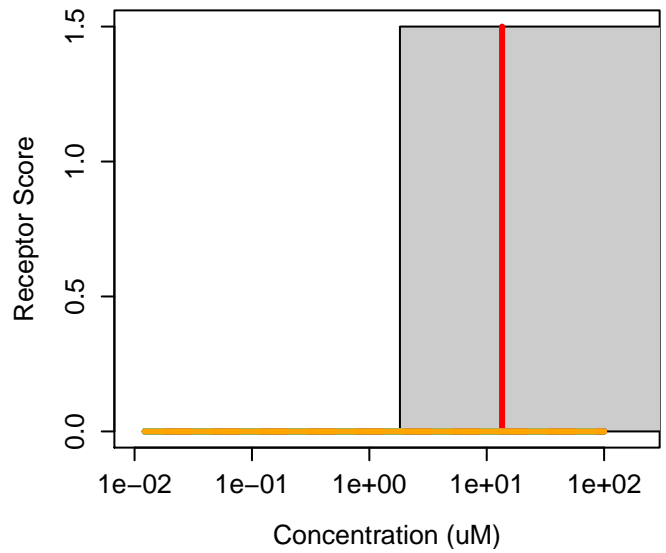

41372-20-7 : Apomorphine hydrochloride hydrat

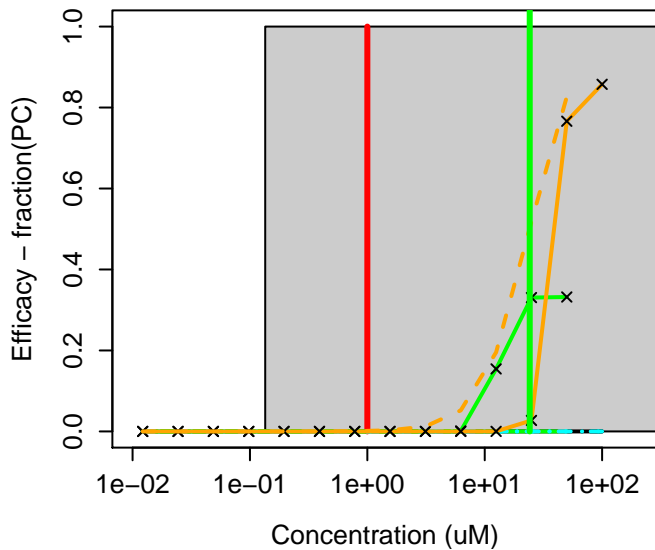

41372-20-7 : Apomorphine hydrochloride hydrat  
Agonist: 0 Antagonist: 0.06

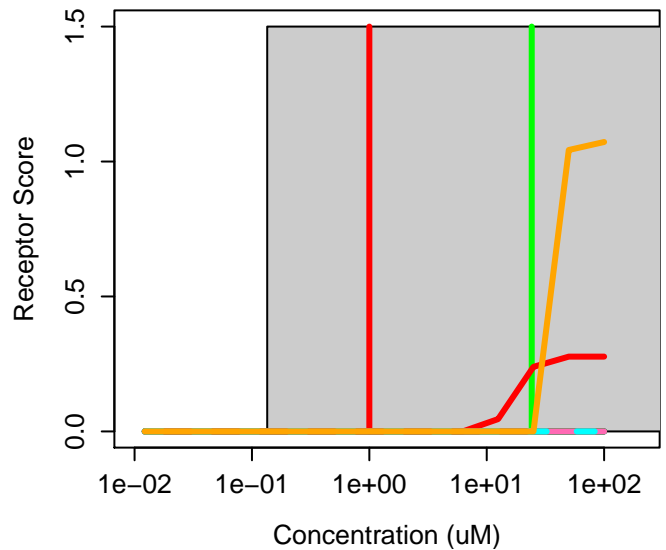

41481-66-7 : 4,4'-Sulfonylbis[2-(prop-2-en-1-yl)ph  
41481-66-7 : 4,4'-Sulfonylbis[2-(prop-2-en-1-yl)ph  
Agonist: 0 Antagonist: 0.21

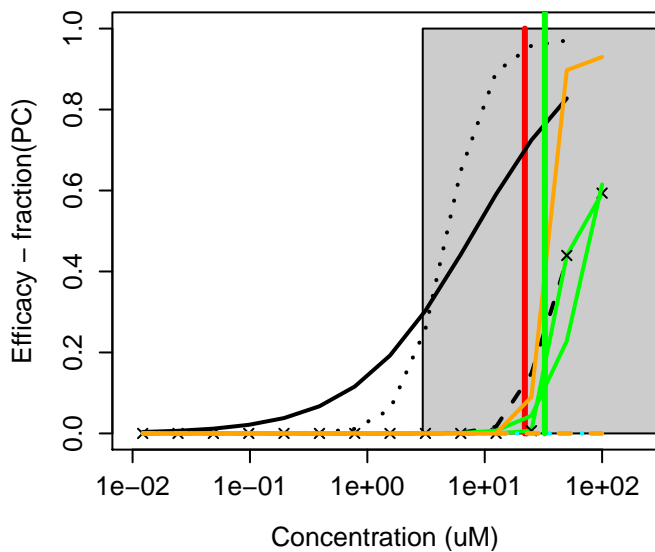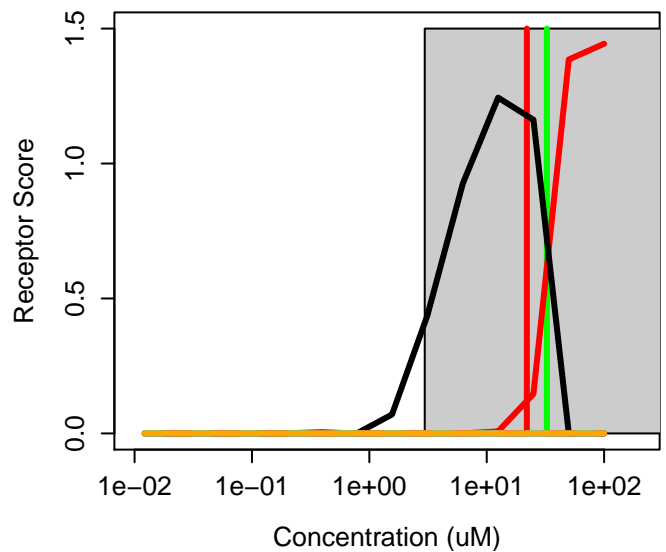

**4151-50-2 : Sulfluramid**

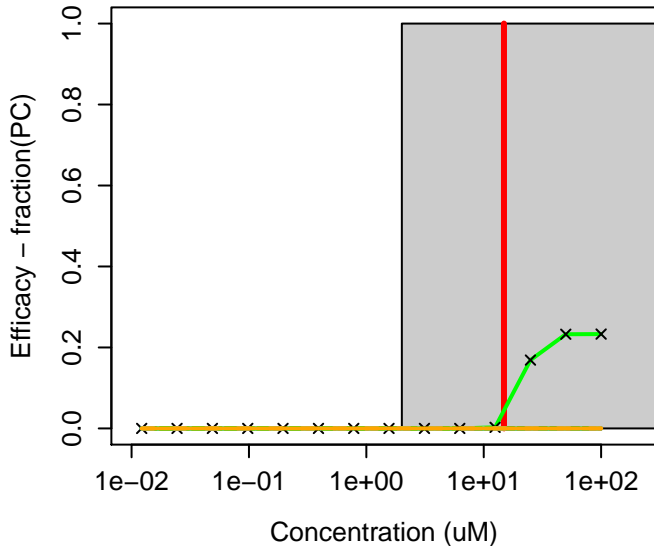

**4151-50-2 : Sulfluramid**  
Agonist: 0 Antagonist: 0

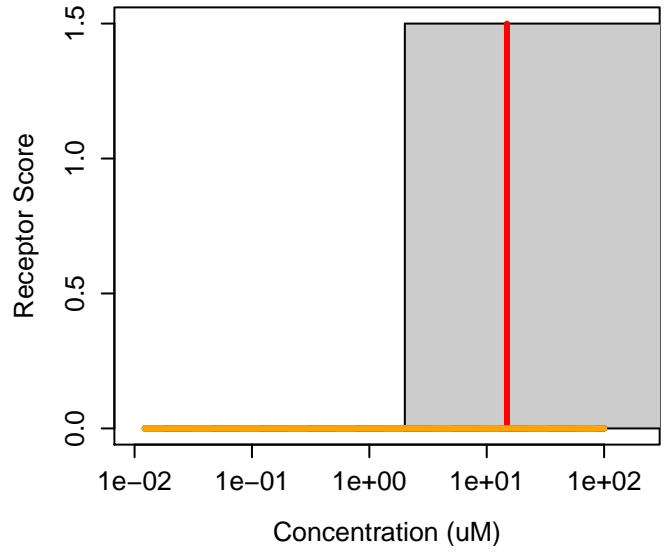

**4180-23-8 : (E)-Anethole**



**4180-23-8 : (E)-Anethole**  
Agonist: 0 Antagonist: 0



**420-04-2 : Cyanamide**

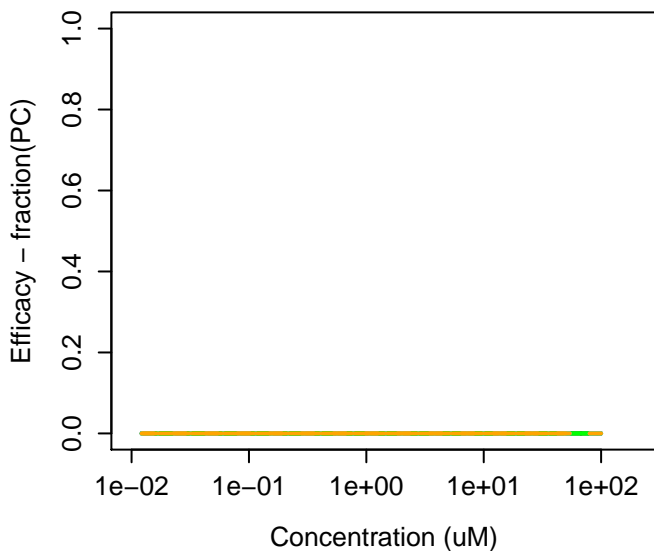

**420-04-2 : Cyanamide**  
Agonist: 0 Antagonist: 0



42509-80-8 : Isazofos



42509-80-8 : Isazofos  
Agonist: 0 Antagonist: 0



427-51-0 : Cyproterone acetate

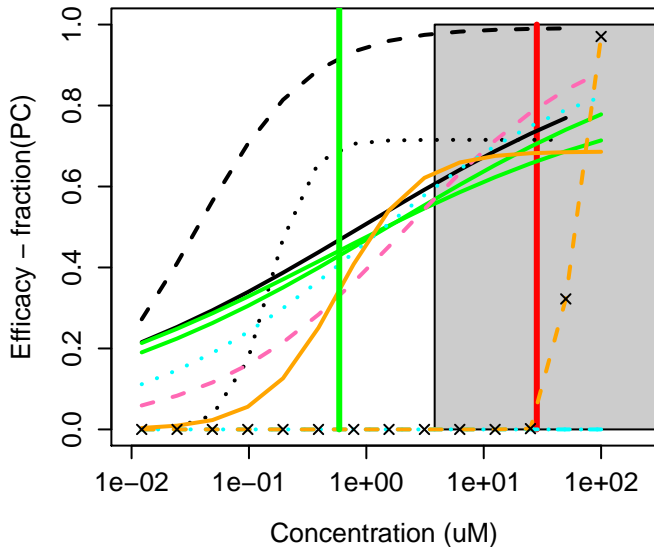

427-51-0 : Cyproterone acetate  
Agonist: 0.49 Antagonist: 0.23

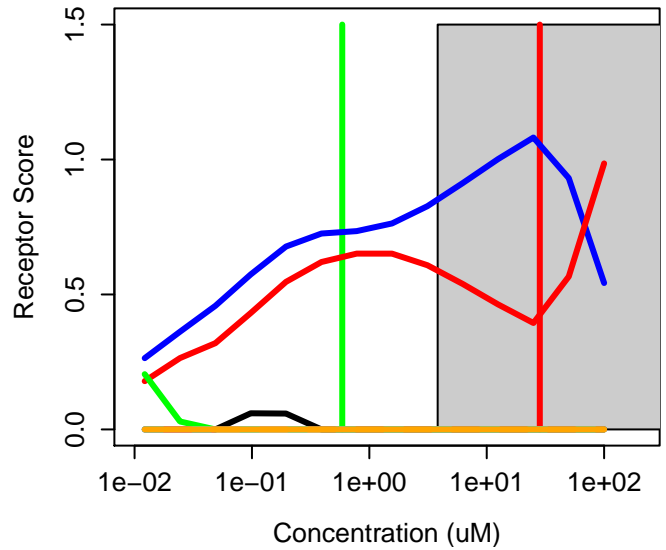

42874-03-3 : Oxyfluorfen

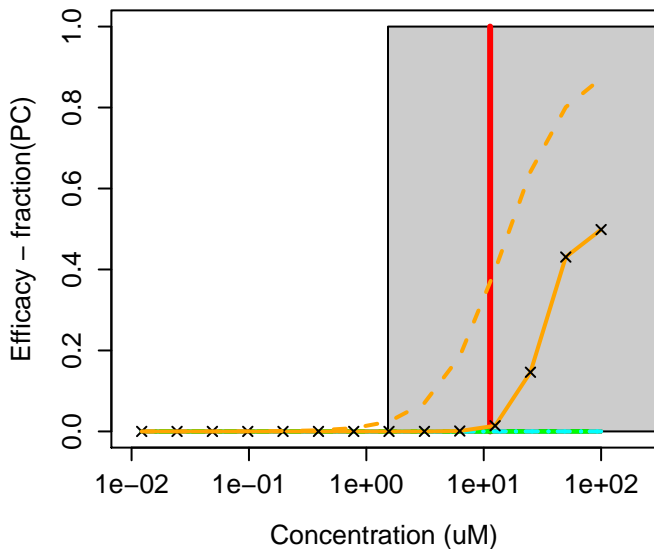

42874-03-3 : Oxyfluorfen  
Agonist: 0 Antagonist: 0

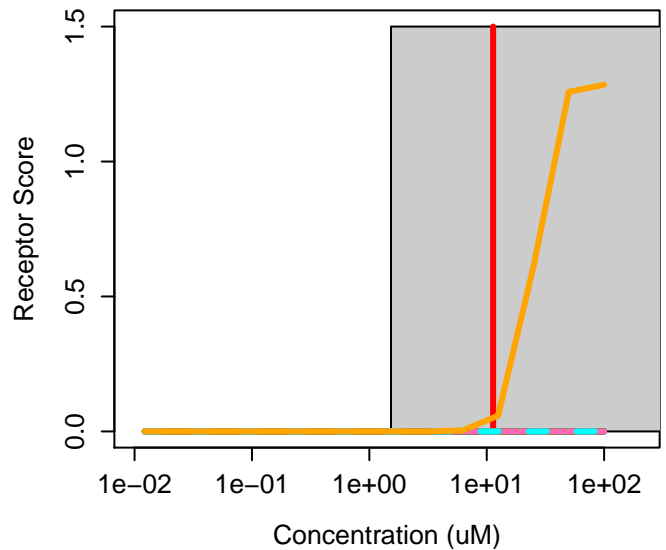

4291-63-8 : Cladribine

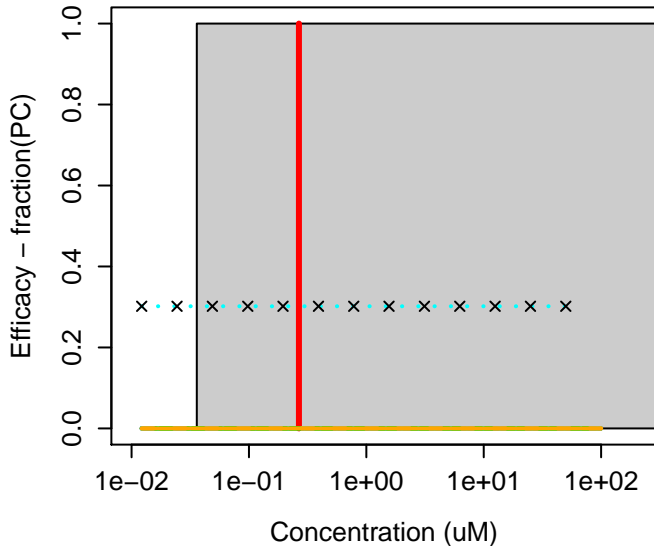

4291-63-8 : Cladribine  
Agonist: 0 Antagonist: 0

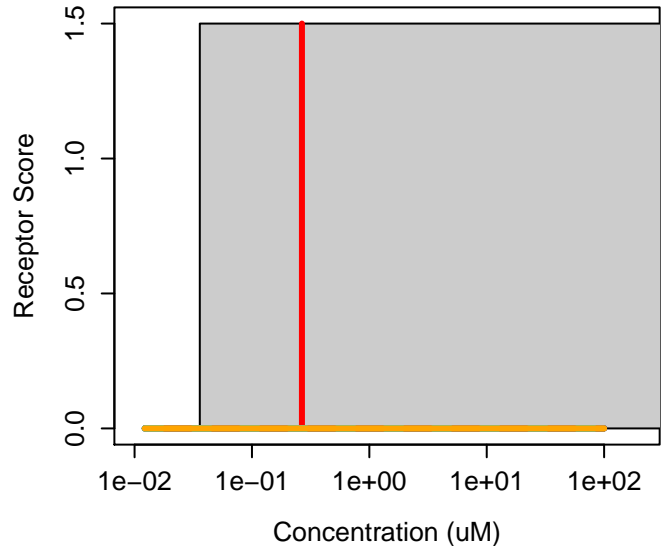

43121-43-3 : Triadimefon

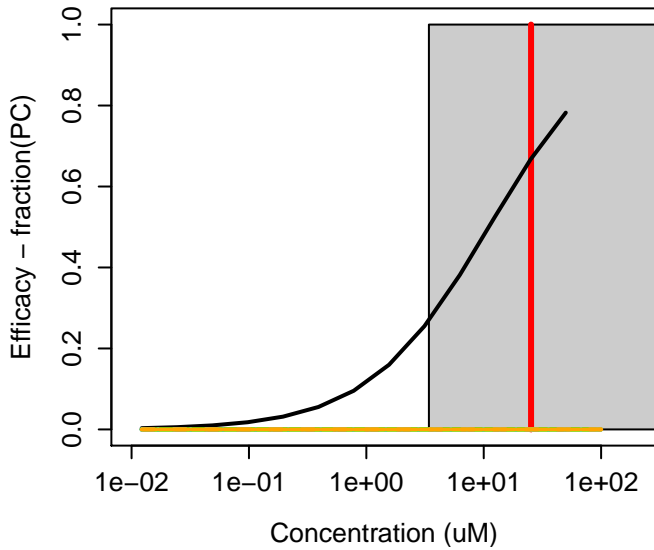

43121-43-3 : Triadimefon  
Agonist: 0 Antagonist: 0

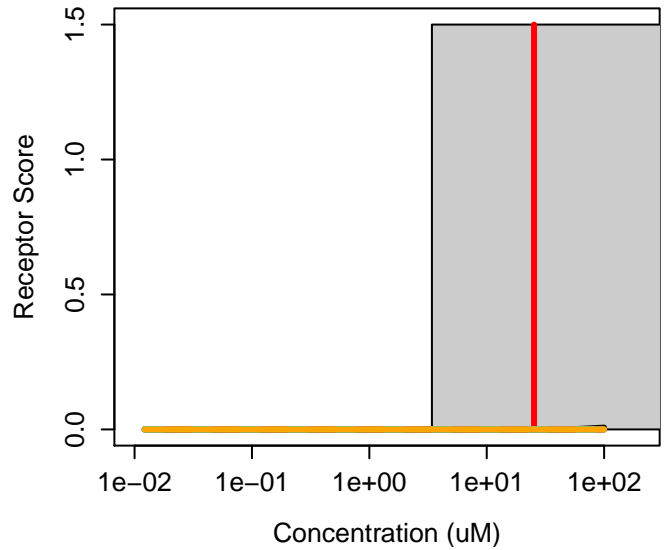

43222-48-6 : Difenzoquat metilsulfate

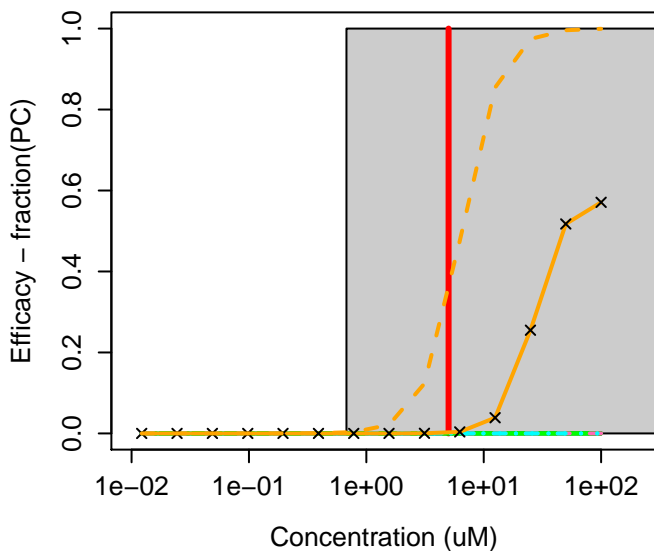

43222-48-6 : Difenzoquat metilsulfate  
Agonist: 0 Antagonist: 0

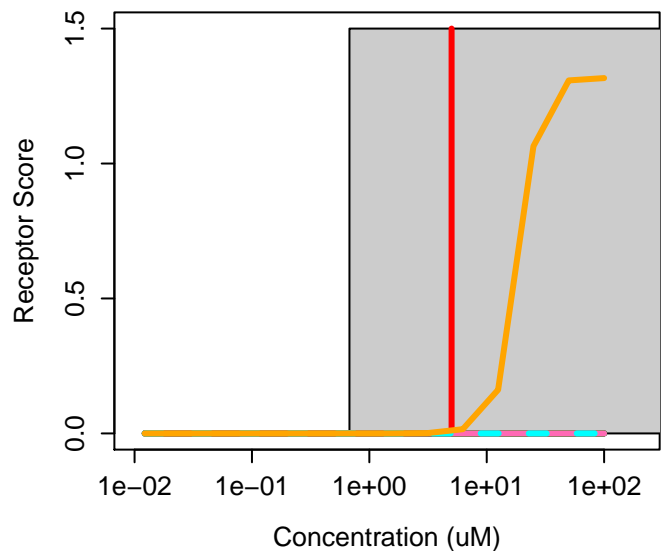



4342-36-3 : Tributyltin benzoate

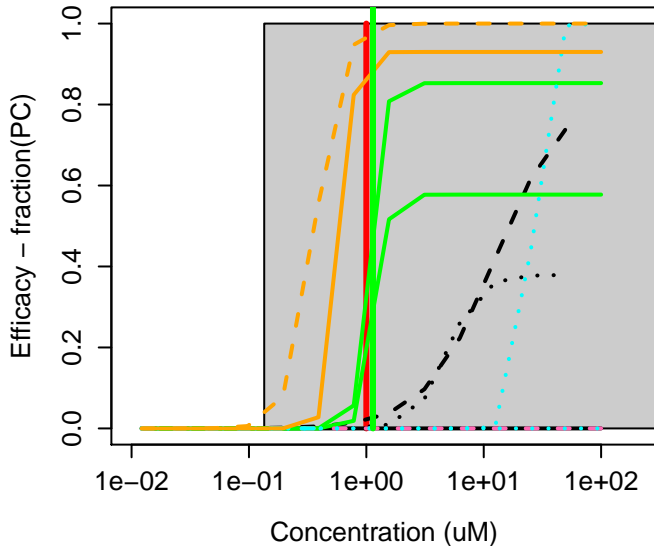

4342-36-3 : Tributyltin benzoate  
Agonist: 0 Antagonist: 0.69

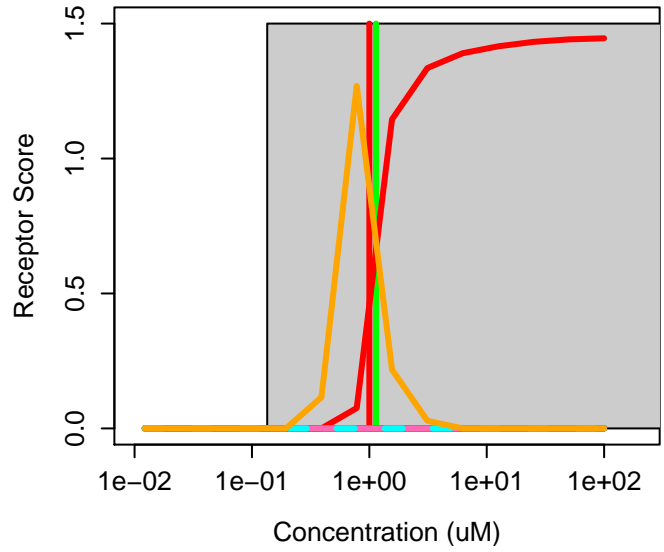

4344-55-2 : 4-Butyloxyaniline

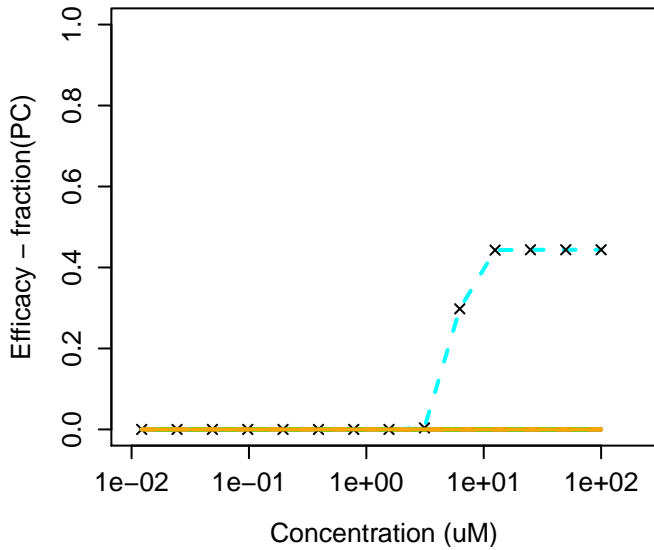

4344-55-2 : 4-Butyloxyaniline  
Agonist: 0 Antagonist: 0



4376-18-5 : Monomethyl phthalate



4376-18-5 : Monomethyl phthalate  
Agonist: 0 Antagonist: 0



4376-20-9 : MEHP

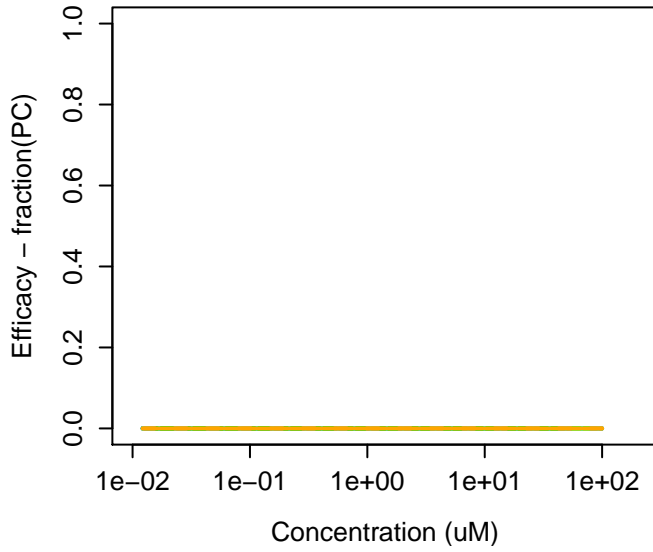

4376-20-9 : MEHP  
Agonist: 0 Antagonist: 0



439687-69-1 : Nelivaptan

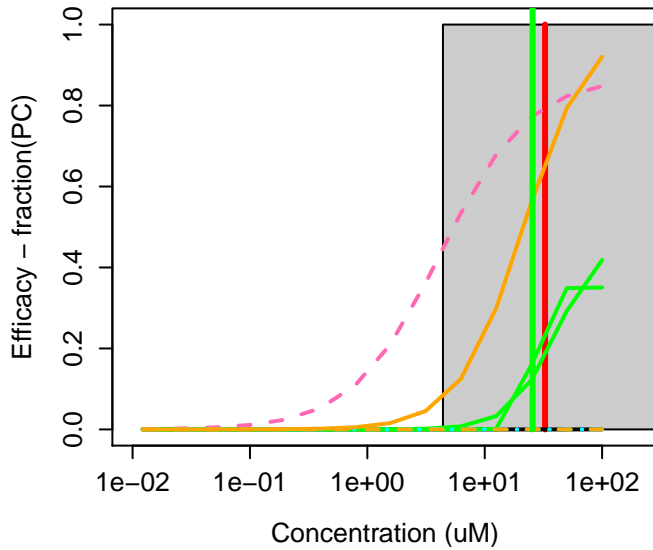

439687-69-1 : Nelivaptan  
Agonist: 0.023 Antagonist: 0.066

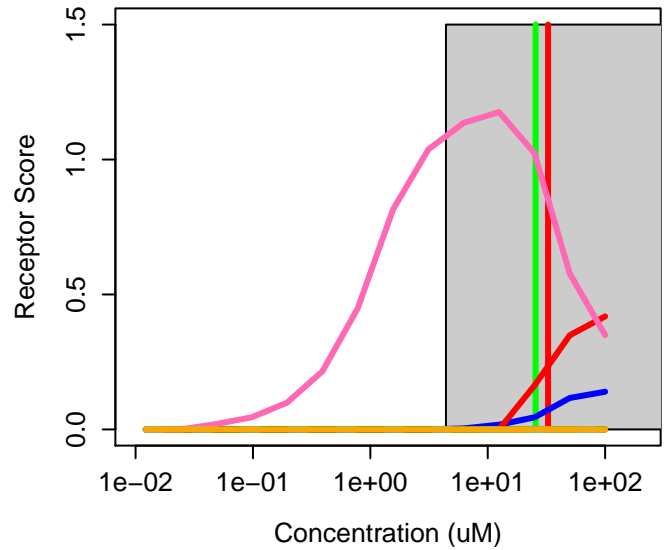

4418-26-2 : Sodium dehydroacetate



4418-26-2 : Sodium dehydroacetate  
Agonist: 0 Antagonist: 0



4437-85-8 : Butylene carbonate



4437-85-8 : Butylene carbonate  
Agonist: 0 Antagonist: 0



444610-91-7 : PharmaGSID\_47315

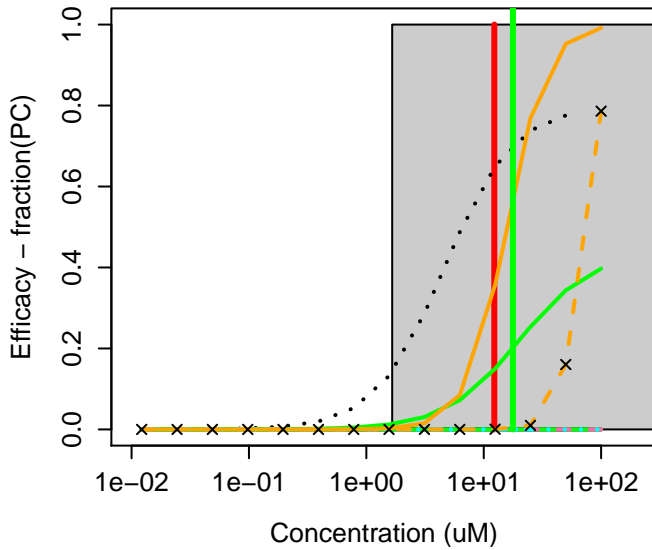

444610-91-7 : PharmaGSID\_47315  
Agonist: 0 Antagonist: 0.22

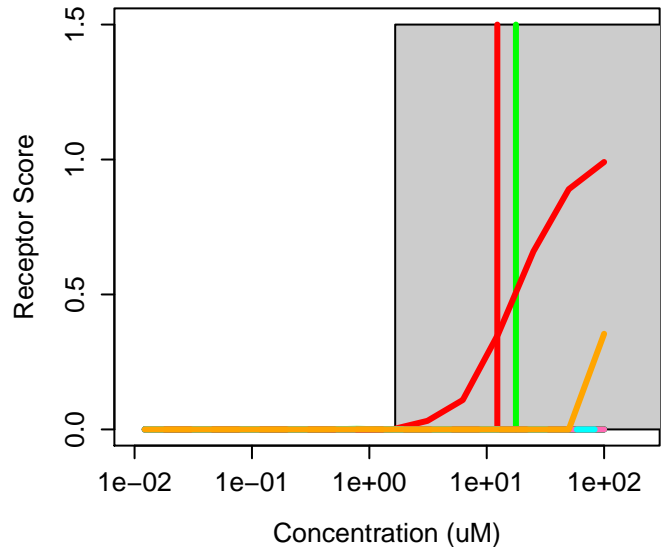

4449-51-8 : Cyclopamine

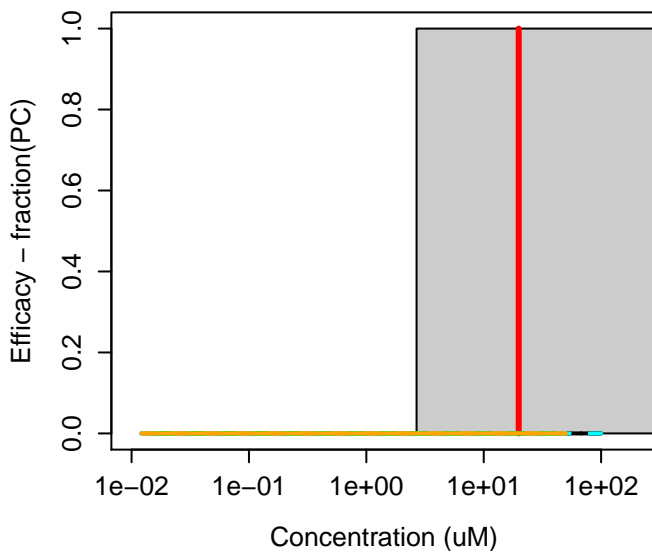

4449-51-8 : Cyclopamine  
Agonist: 0 Antagonist: 0

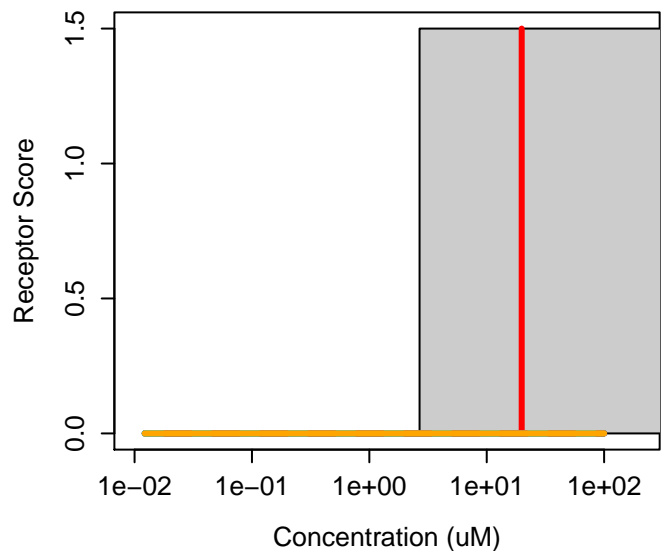

445295-04-5 : CP-671305



445295-04-5 : CP-671305  
Agonist: 0 Antagonist: 0



4455-26-9 : N-Methyldioctylamine



4455-26-9 : N-Methyldioctylamine  
Agonist: 0 Antagonist: 0



446-72-0 : Genistein

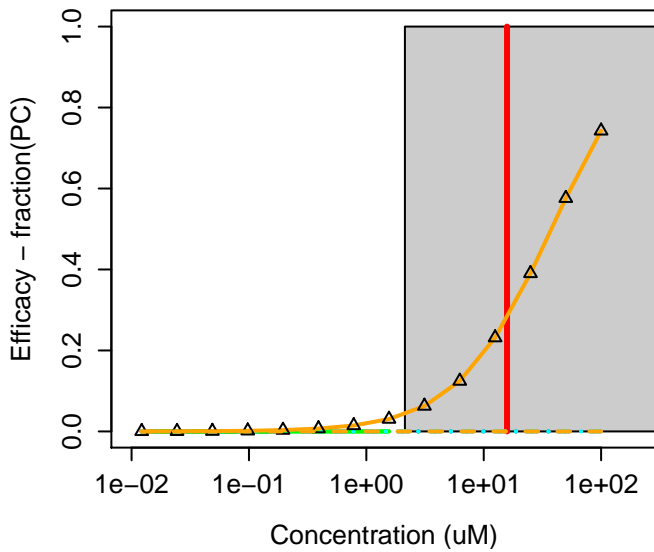

446-72-0 : Genistein  
Agonist: 0 Antagonist: 0

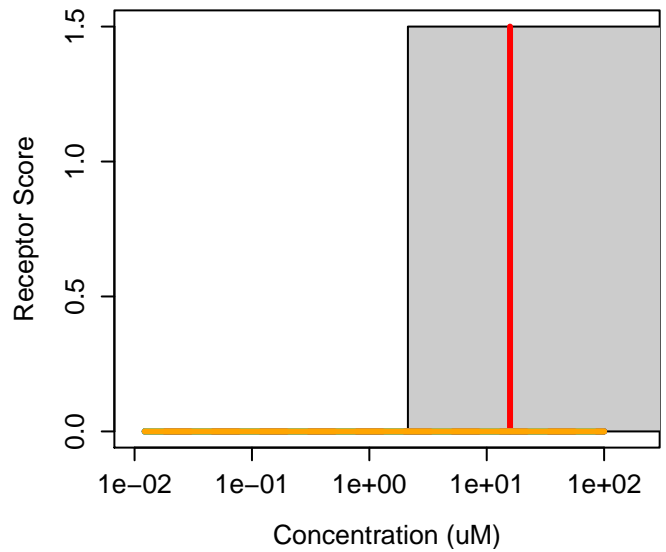

4468-42-2 : 3-Phenylhexane



4468-42-2 : 3-Phenylhexane  
Agonist: 0 Antagonist: 0



446-86-6 : Azathioprine

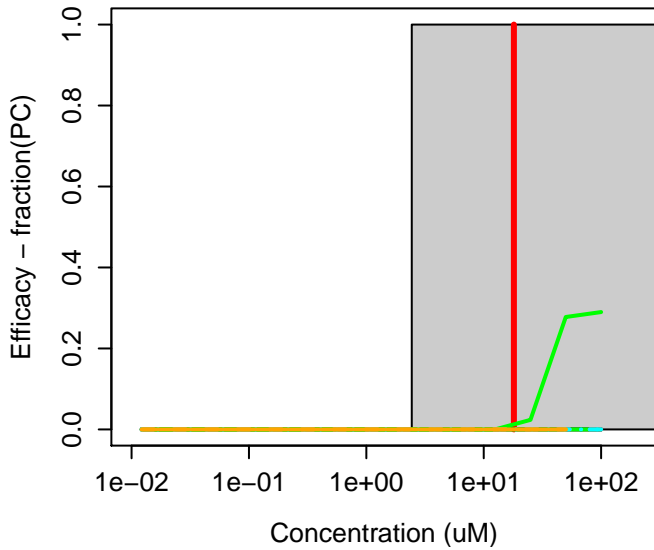

446-86-6 : Azathioprine  
Agonist: 0 Antagonist: 0

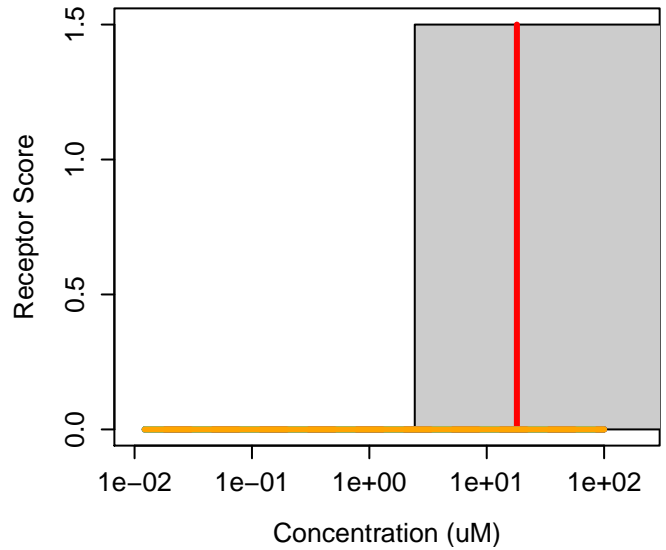

451-40-1 : 1,2-Diphenylethanone



451-40-1 : 1,2-Diphenylethanone  
Agonist: 0 Antagonist: 0



4548-53-2 : FD&C Red 4



4548-53-2 : FD&C Red 4  
Agonist: 0 Antagonist: 0



4553-62-2 : 2-Methylpentanedinitrile



4553-62-2 : 2-Methylpentanedinitrile  
Agonist: 0 Antagonist: 0



~~l~~trimethylammonium chlorideN,N,N-Trimethyltetradeltrimethylammonium chlorideN,N,N-Trimethyltetradel  
Agonist: 0 Antagonist: 0.4

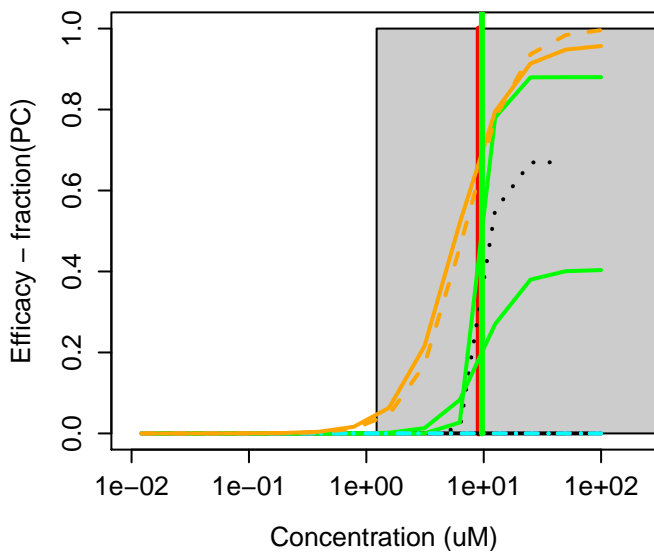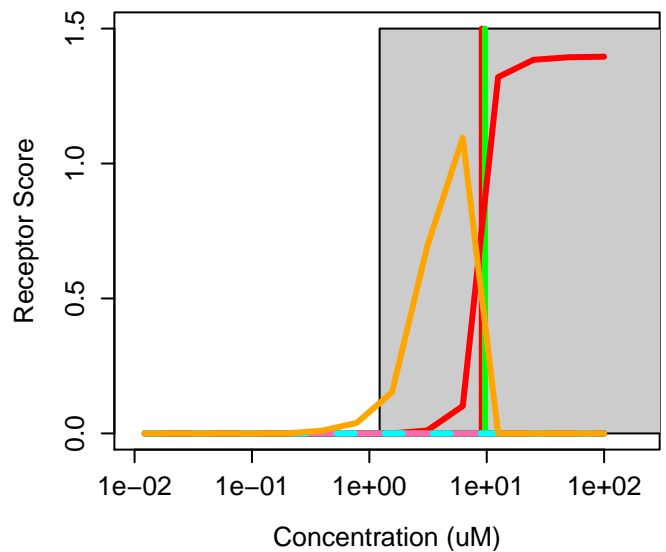

460-00-4 : 1-Bromo-4-fluorobenzene



460-00-4 : 1-Bromo-4-fluorobenzene  
Agonist: 0 Antagonist: 0



460081-99-6 : PharmaGSID\_48510

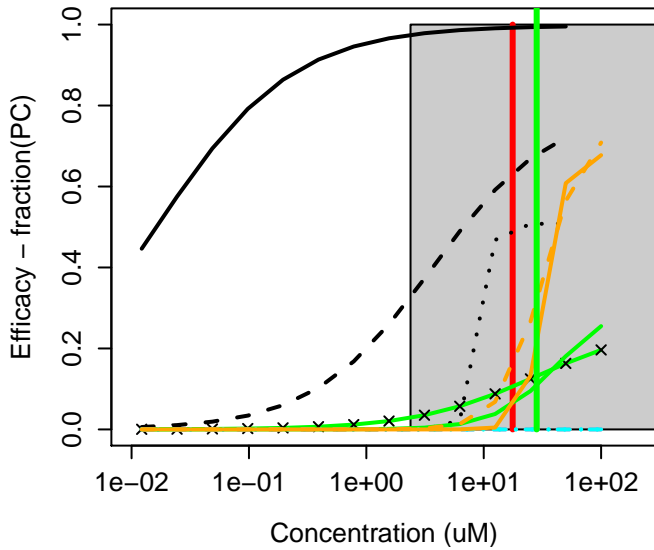

460081-99-6 : PharmaGSID\_48510  
Agonist: 0.0044 Antagonist: 0.27

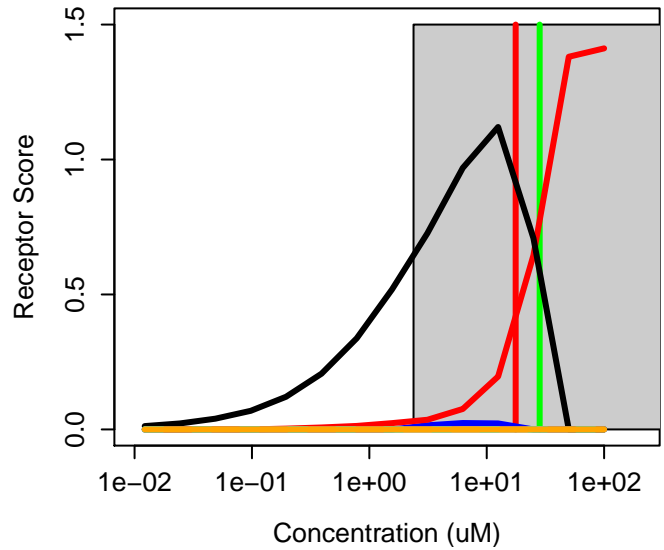

4602-84-0 : Farnesol

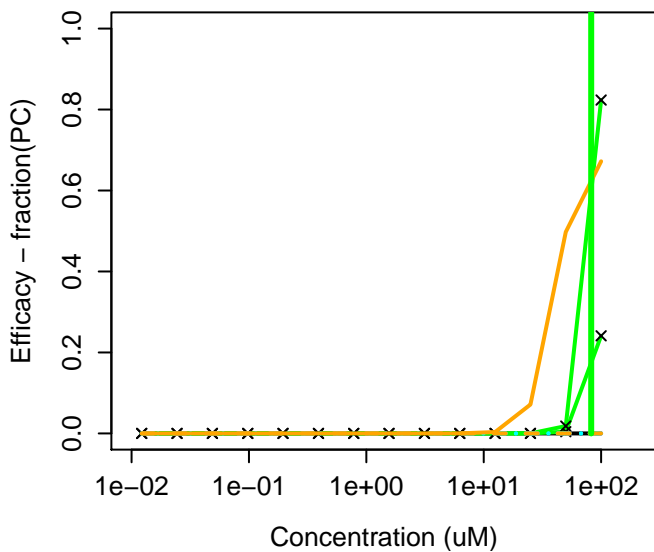

4602-84-0 : Farnesol  
Agonist: 0 Antagonist: 0.041

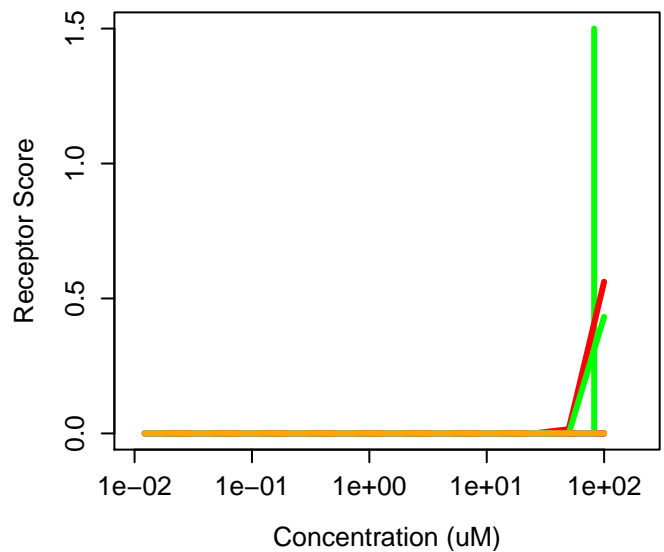

461023-63-2 : Aplaviroc hydrochloride

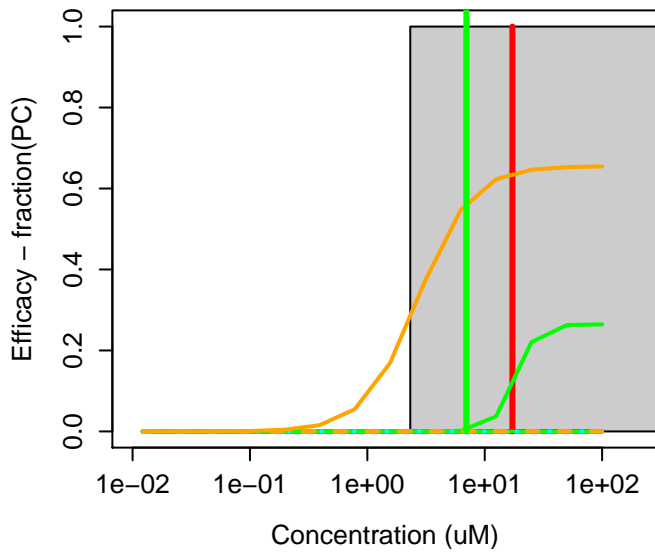

461023-63-2 : Aplaviroc hydrochloride  
Agonist: 0 Antagonist: 0.039

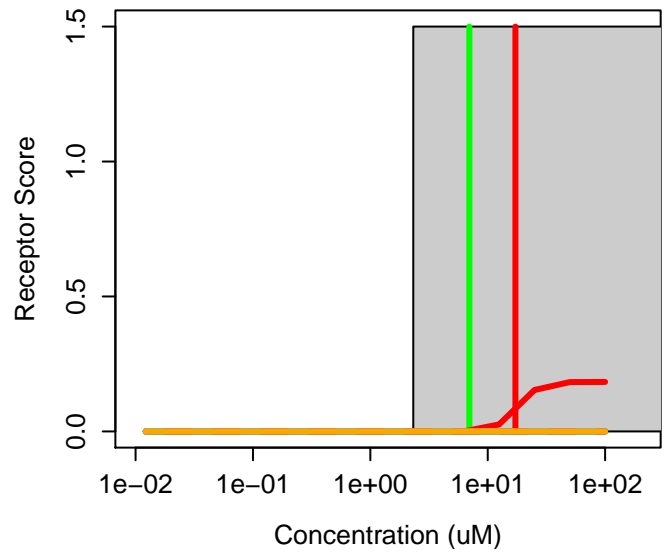

461-58-5 : Cyanoguanidine



461-58-5 : Cyanoguanidine  
Agonist: 0 Antagonist: 0



463-40-1 : Linolenic acid

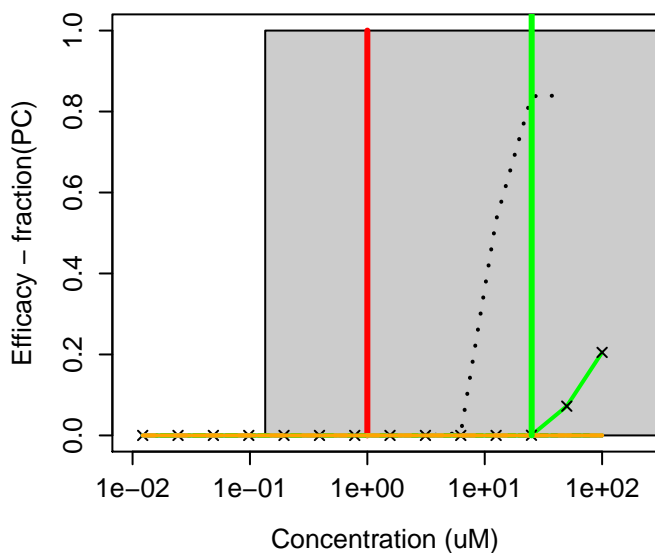

463-40-1 : Linolenic acid  
Agonist: 0.0052 Antagonist: 0.01

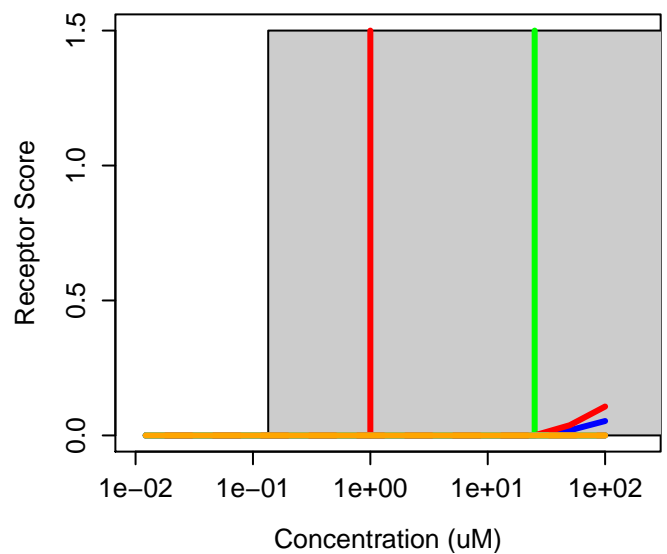



4638-48-6 : 5-Chlorosalicylanilide

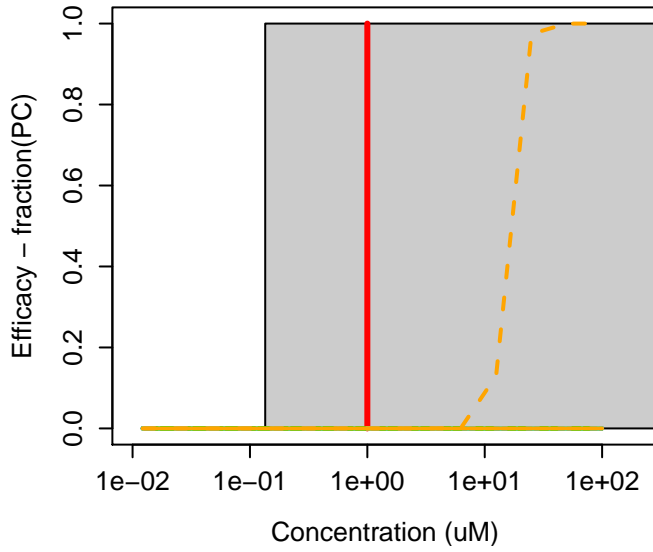

4638-48-6 : 5-Chlorosalicylanilide  
Agonist: 0 Antagonist: 0

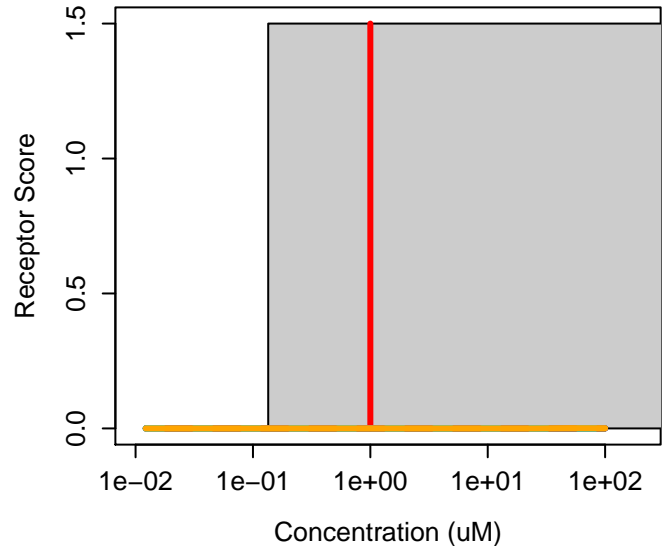

464-49-3 : D-Camphor



464-49-3 : D-Camphor  
Agonist: 0 Antagonist: 0



4707-47-5 : Methyl 2,4-dihydroxy-3,6-dimethylbenz 4707-47-5 : Methyl 2,4-dihydroxy-3,6-dimethylbenz  
Agonist: 0 Antagonist: 0

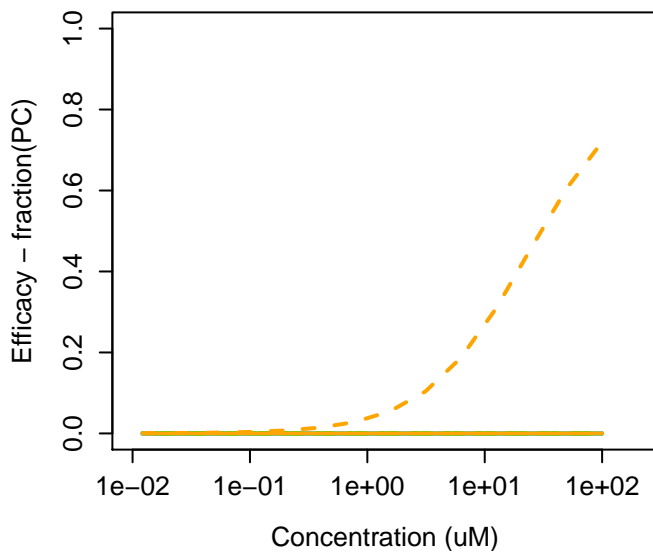

**470-82-6 : 1,8-Cineol**



**470-82-6 : 1,8-Cineol  
Agonist: 0 Antagonist: 0**



**4712-55-4 : Diphenyl phosphite**



**4712-55-4 : Diphenyl phosphite  
Agonist: 0 Antagonist: 0**



**473289-62-2 : Ilepatril**



**473289-62-2 : Ilepatril  
Agonist: 0 Antagonist: 0**



474-86-2 : Equilin

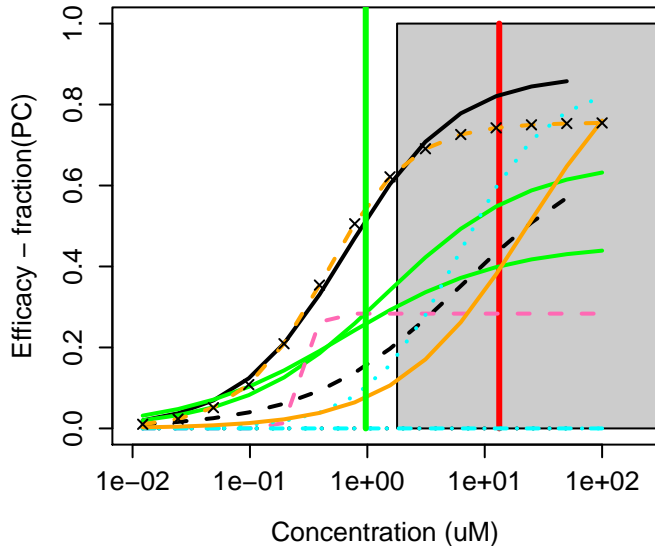

474-86-2 : Equilin  
Agonist: 0.081 Antagonist: 0.66

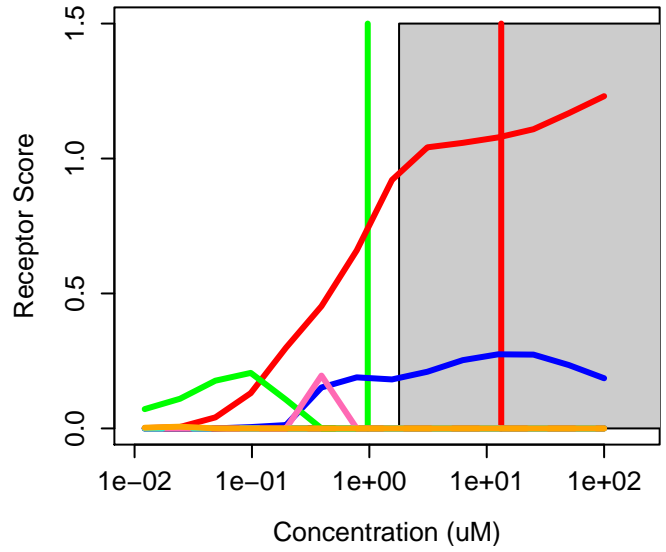

478149-53-0 : PHA-00543613

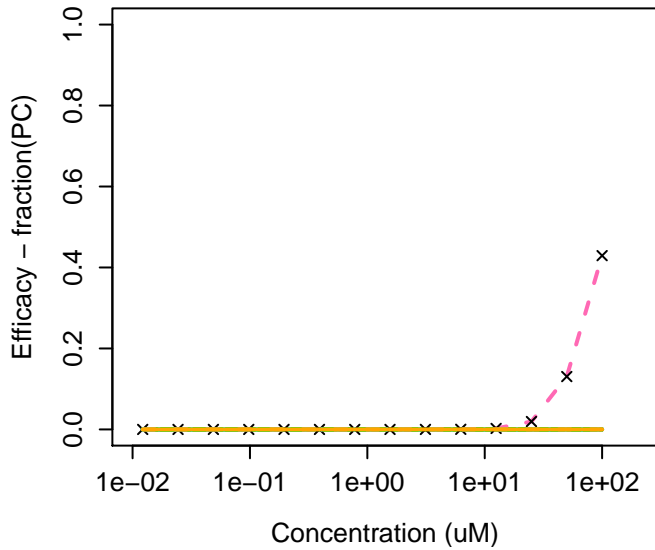

478149-53-0 : PHA-00543613  
Agonist: 0 Antagonist: 0

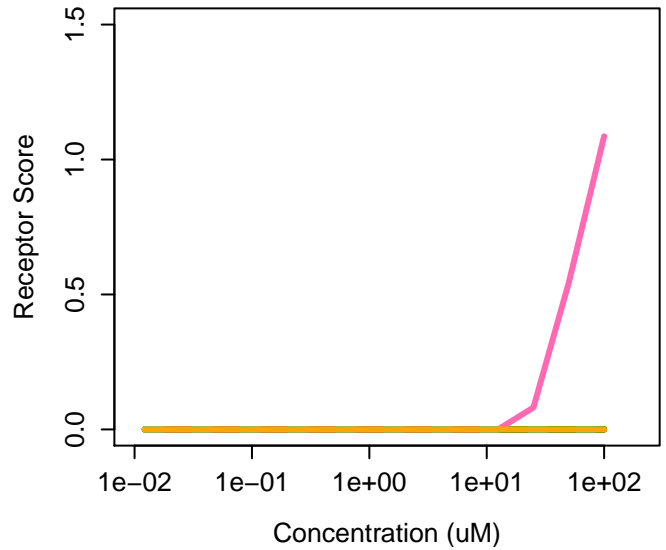

478263-98-8 : AVE3295

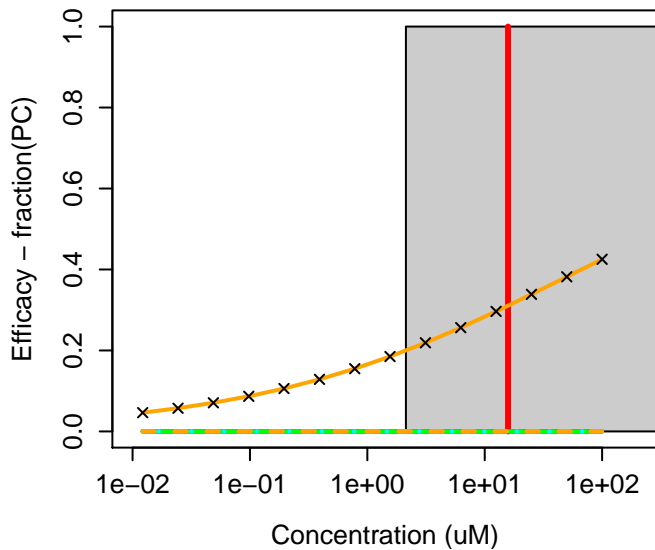

478263-98-8 : AVE3295  
Agonist: 0 Antagonist: 0

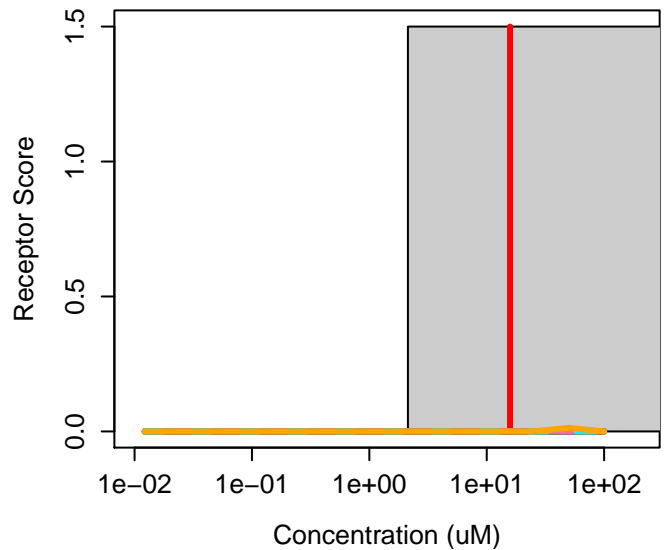

**480-40-0 : Chrysin**

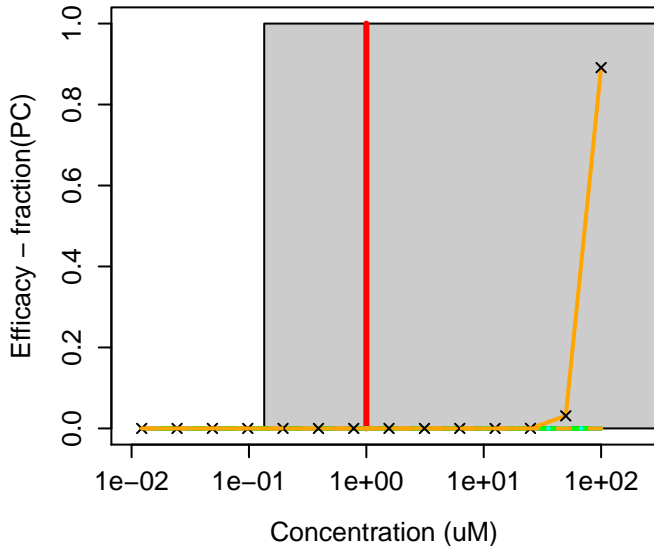

**480-40-0 : Chrysin  
Agonist: 0 Antagonist: 0**



**480-63-7 : 2,4,6-Trimethylbenzoic acid**



**480-63-7 : 2,4,6-Trimethylbenzoic acid  
Agonist: 0 Antagonist: 0**



**484-17-3 : 9-Phenanthrol**

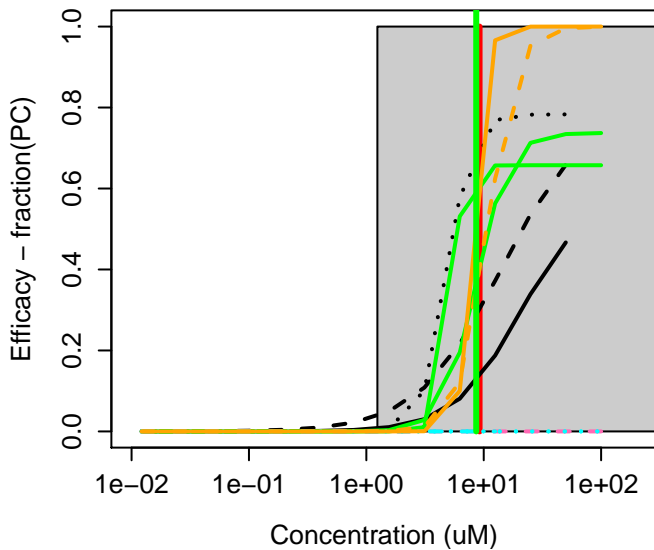

**484-17-3 : 9-Phenanthrol  
Agonist: 0.011 Antagonist: 0.48**

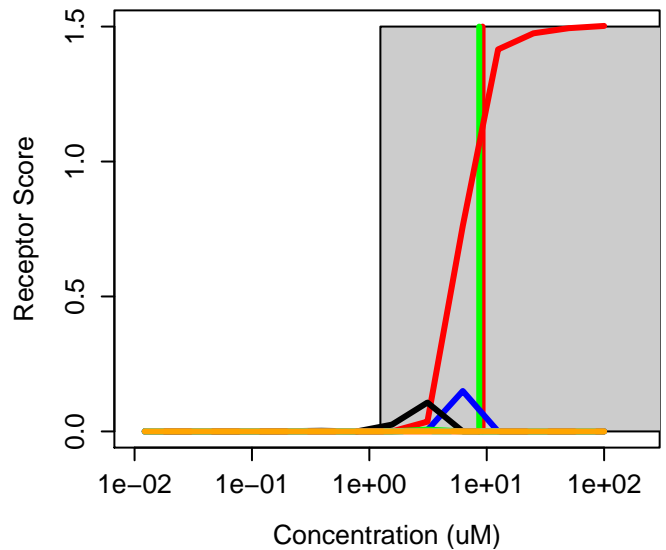

486-56-6 : Cotinine

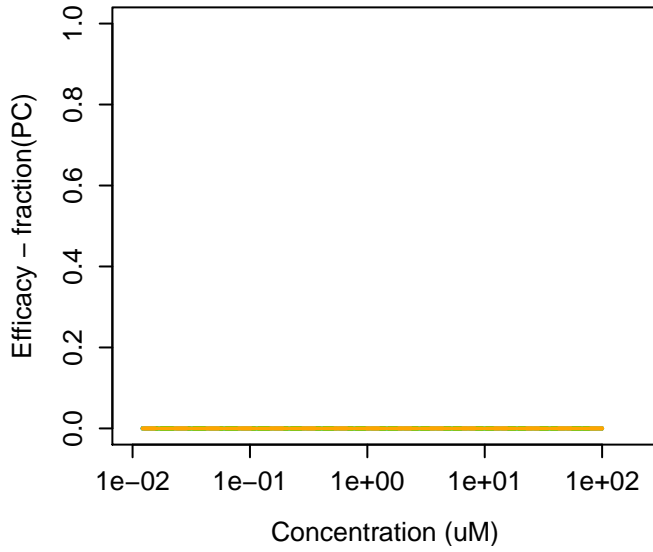

486-56-6 : Cotinine  
Agonist: 0 Antagonist: 0



486-66-8 : Daidzein

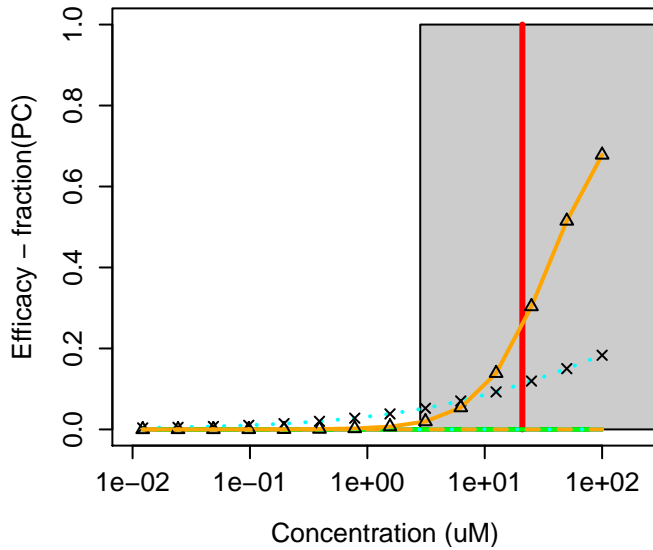

486-66-8 : Daidzein  
Agonist: 0 Antagonist: 0

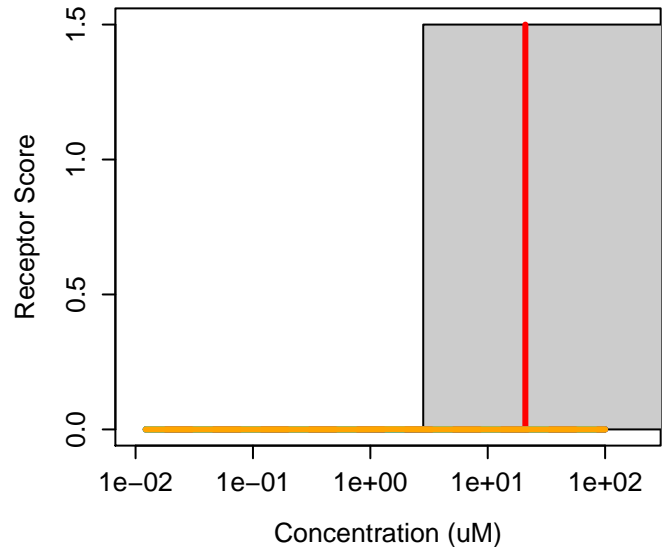

487-06-9 : 5,7-Dimethoxy-2H-chromen-2-one

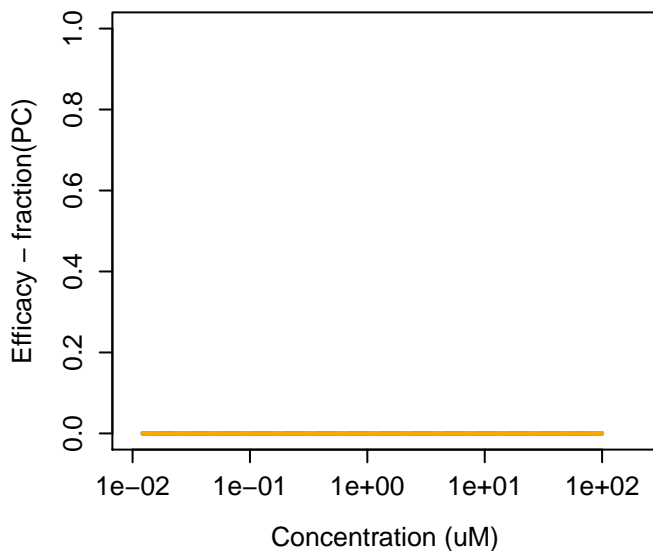

487-06-9 : 5,7-Dimethoxy-2H-chromen-2-one  
Agonist: 0 Antagonist: 0



489-01-0 : 2,6-Di-tert-butyl-4-methoxyphenol



489-01-0 : 2,6-Di-tert-butyl-4-methoxyphenol  
Agonist: 0 Antagonist: 0



4904-61-4 : 1,5,9-Cyclododecatriene



4904-61-4 : 1,5,9-Cyclododecatriene  
Agonist: 0 Antagonist: 0



491-80-5 : Biochanin A

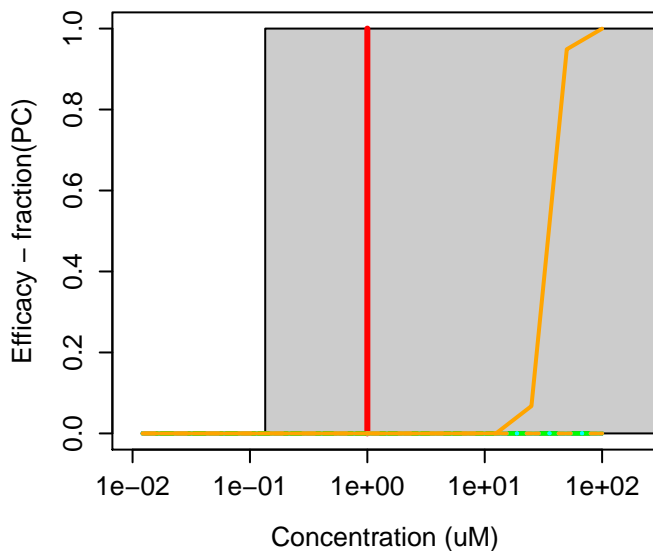

491-80-5 : Biochanin A  
Agonist: 0 Antagonist: 0

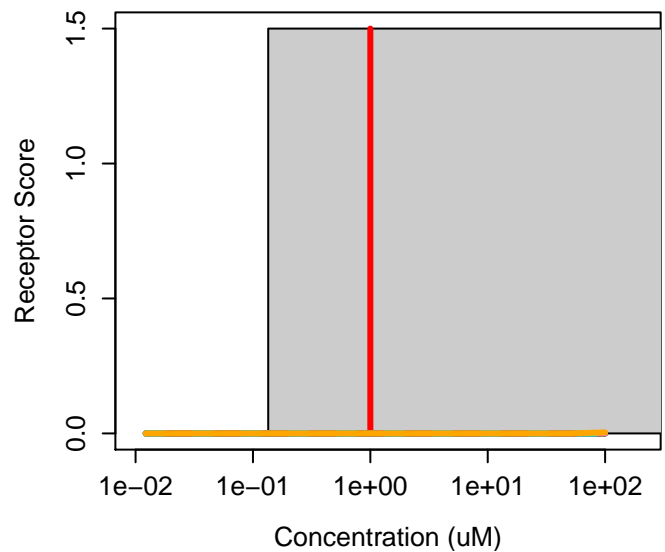

493-52-7 : Methyl red

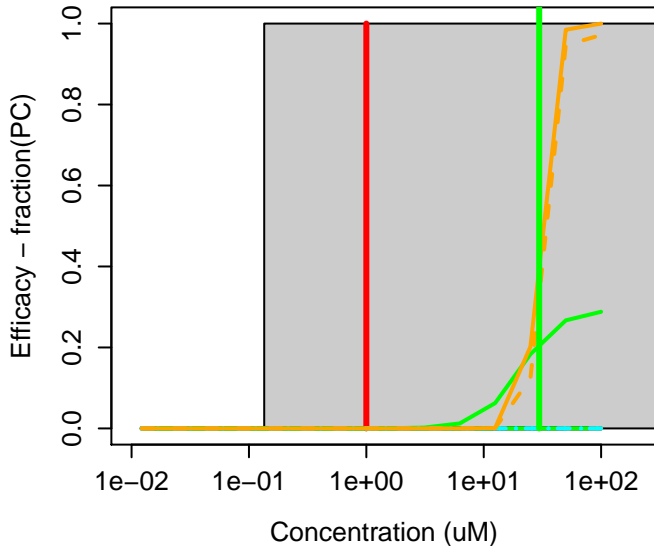

493-52-7 : Methyl red  
Agonist: 0 Antagonist: 0.038

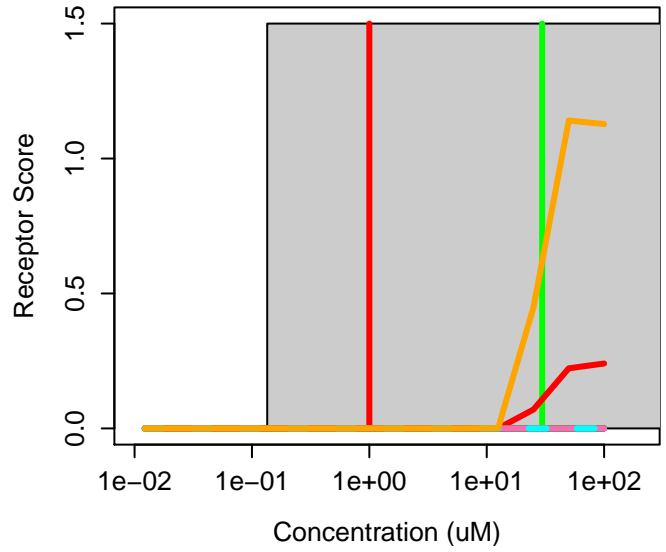

4940-11-8 : 2-Ethyl-3-hydroxy-4H-pyran-4-on

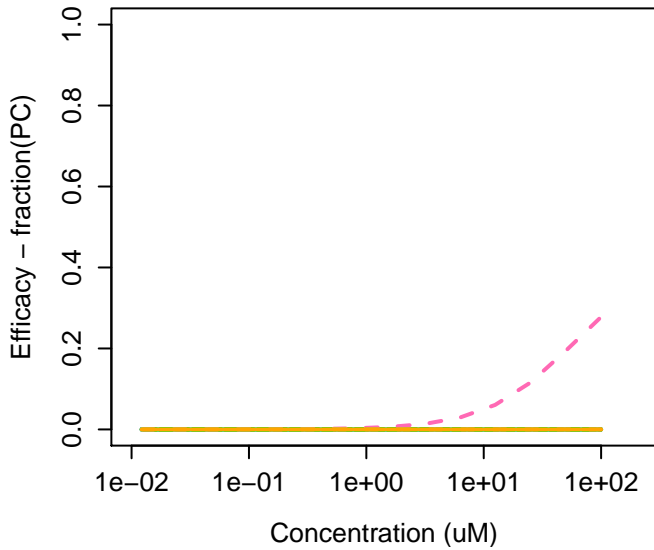

4940-11-8 : 2-Ethyl-3-hydroxy-4H-pyran-4-on  
Agonist: 0 Antagonist: 0

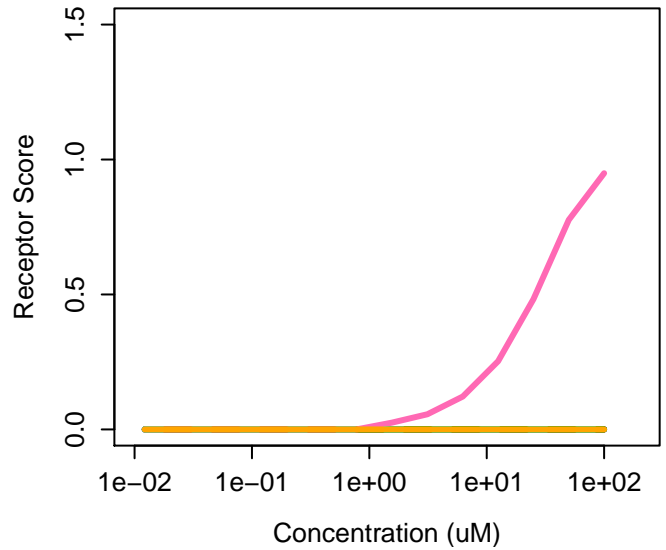

49562-28-9 : Fenofibrate

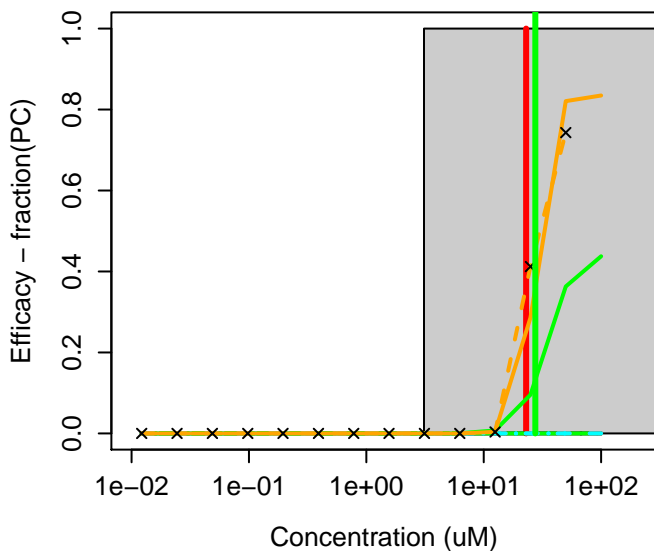

49562-28-9 : Fenofibrate  
Agonist: 0 Antagonist: 0.053

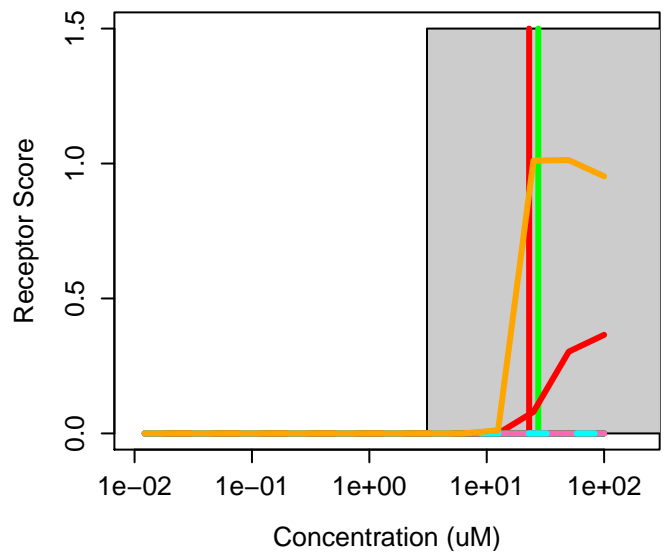

496-46-8 : Glycoluril



496-46-8 : Glycoluril  
Agonist: 0 Antagonist: 0



496-72-0 : 3,4-Diaminotoluene

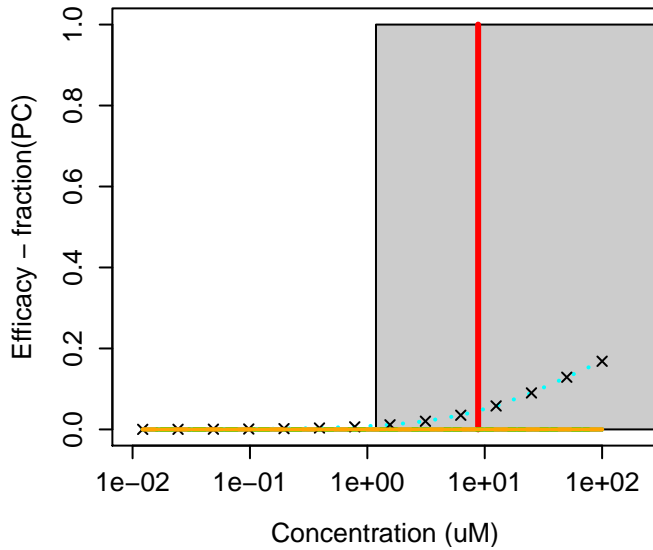

496-72-0 : 3,4-Diaminotoluene  
Agonist: 0 Antagonist: 0

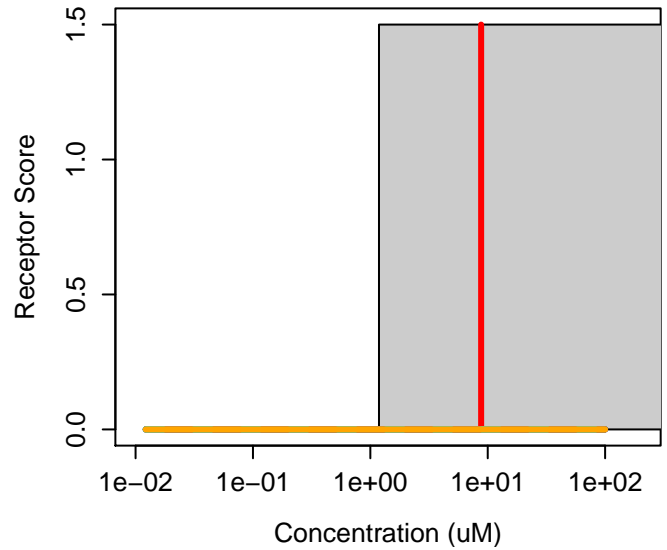

499-75-2 : Isopropyl-o-cresol



499-75-2 : Isopropyl-o-cresol  
Agonist: 0 Antagonist: 0





499-83-2 : 2,6-Pyridinedicarboxylic acid



499-83-2 : 2,6-Pyridinedicarboxylic acid  
Agonist: 0 Antagonist: 0



500-38-9 : Nordihydroguaiaretic acid

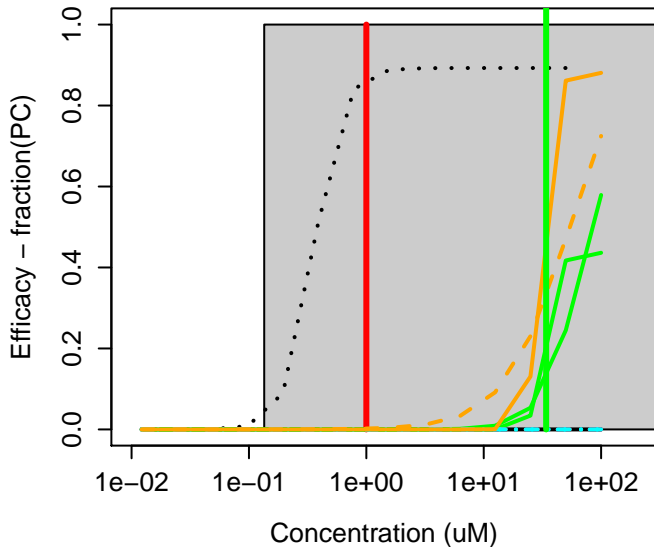

500-38-9 : Nordihydroguaiaretic acid  
Agonist: 0.00012 Antagonist: 0.22

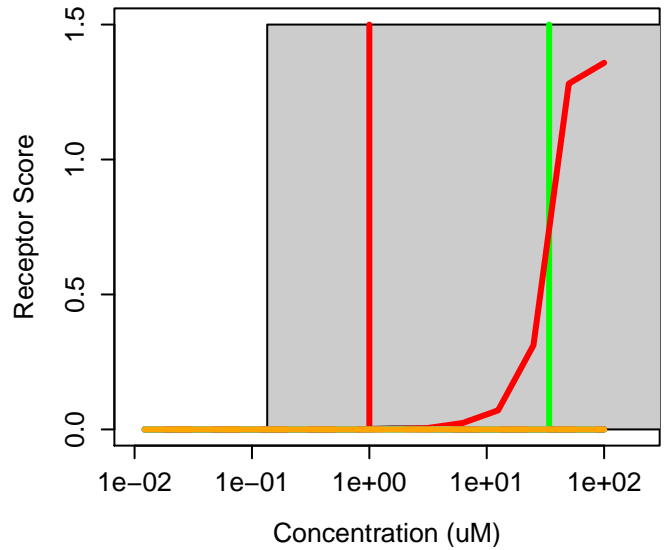

501027-49-2 : PD-0333941

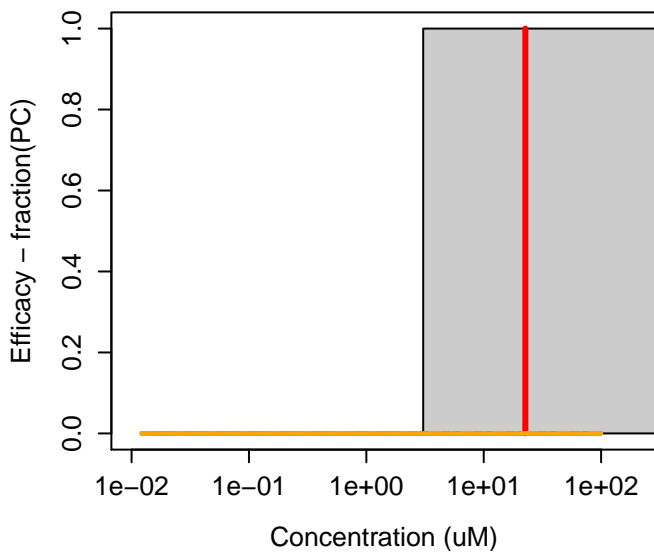

501027-49-2 : PD-0333941  
Agonist: 0 Antagonist: 0

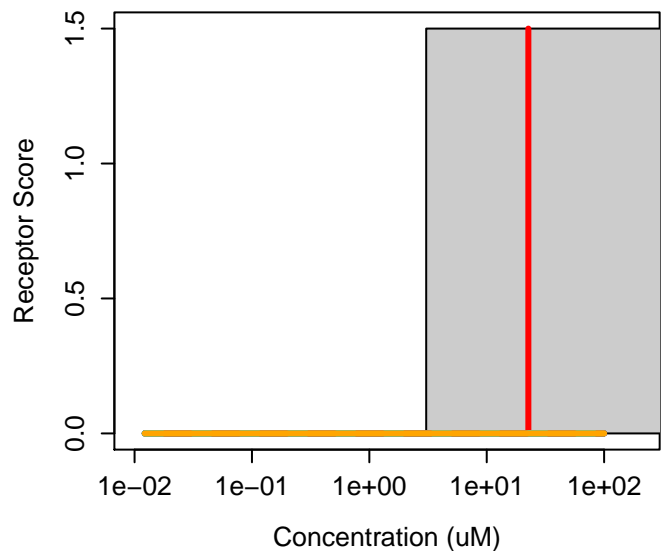

50-14-6 : Ergocalciferol

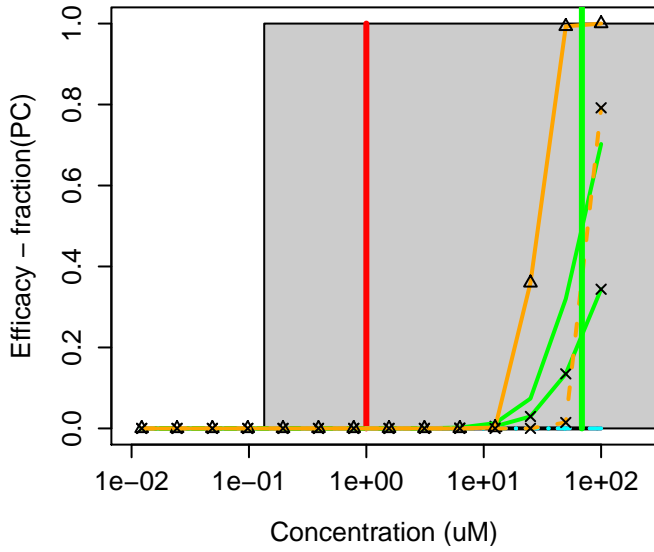

50-14-6 : Ergocalciferol  
Agonist: 0 Antagonist: 0.091

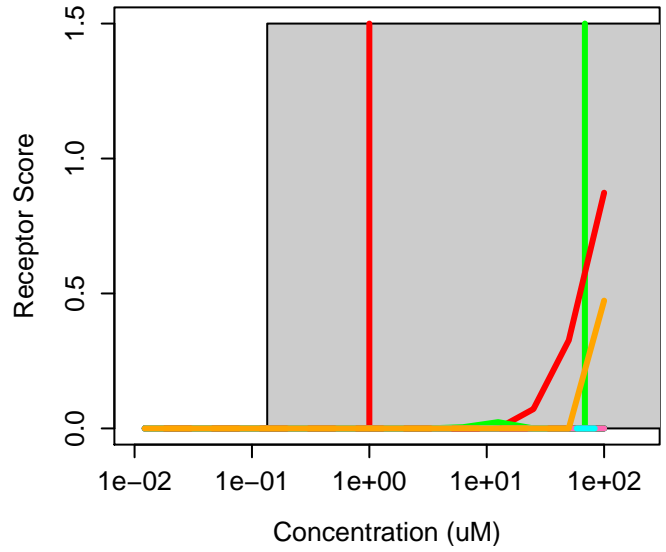

50-21-5 : Lactic acid

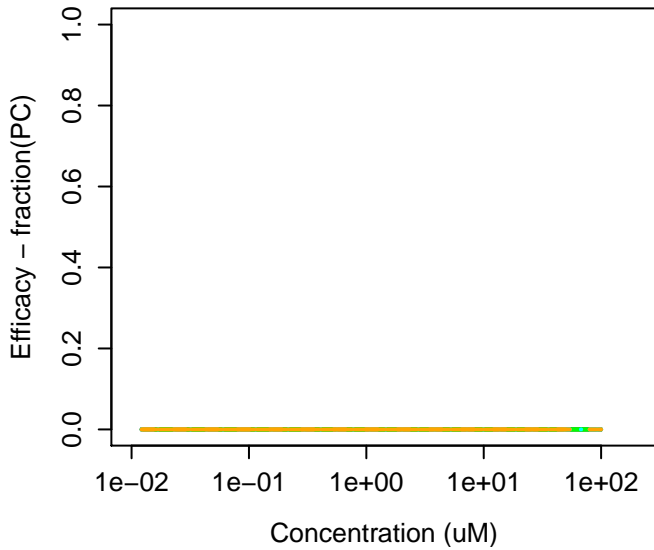

50-21-5 : Lactic acid  
Agonist: 0 Antagonist: 0



50-22-6 : Corticosterone

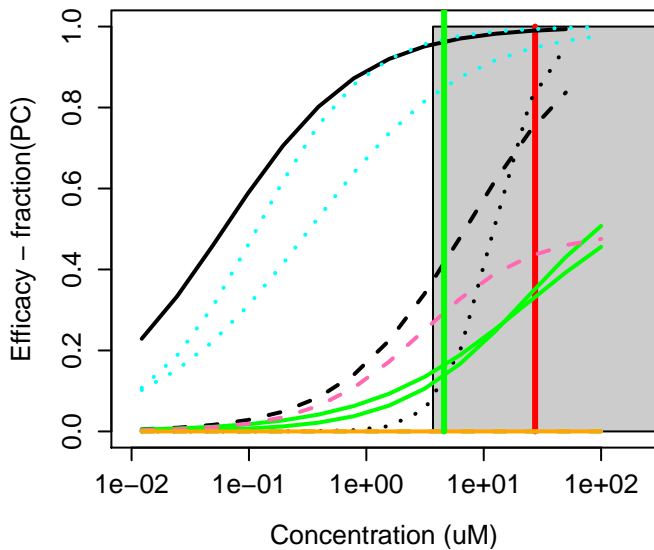

50-22-6 : Corticosterone  
Agonist: 0.88 Antagonist: 0

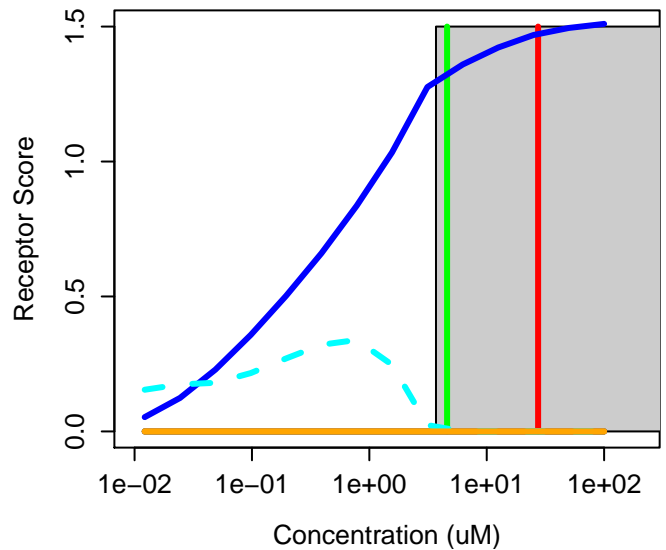

50-27-1 : Estriol

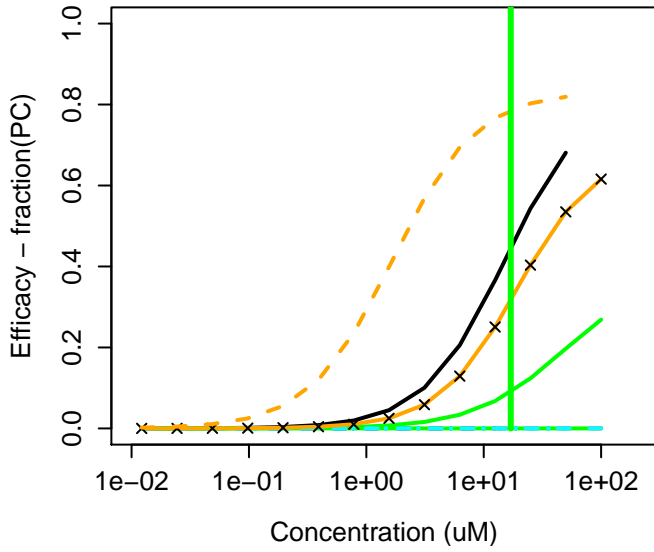

50-27-1 : Estriol  
Agonist: 0 Antagonist: 0.21

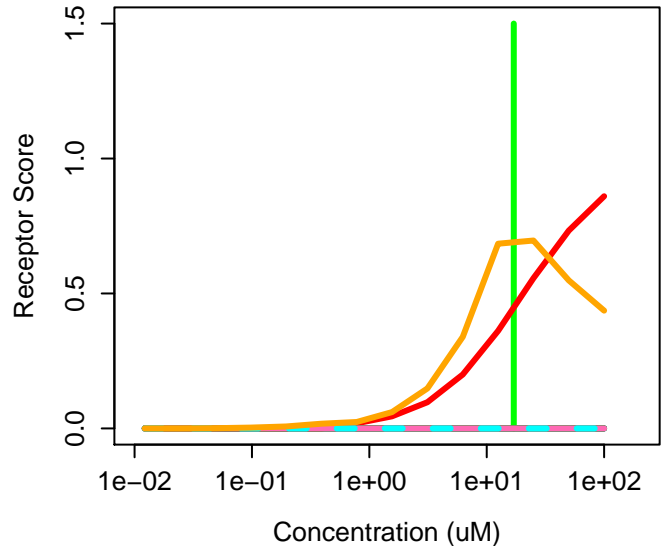

50-28-2 : 17beta-Estradiol

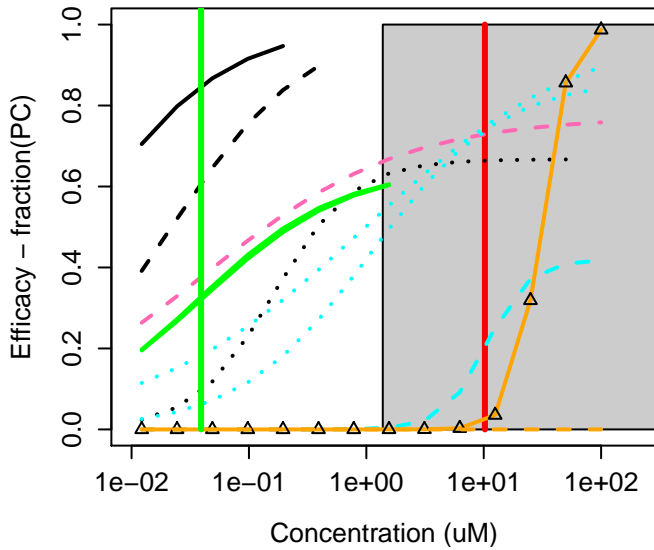

50-28-2 : 17beta-Estradiol  
Agonist: 1.3 Antagonist: 0.052

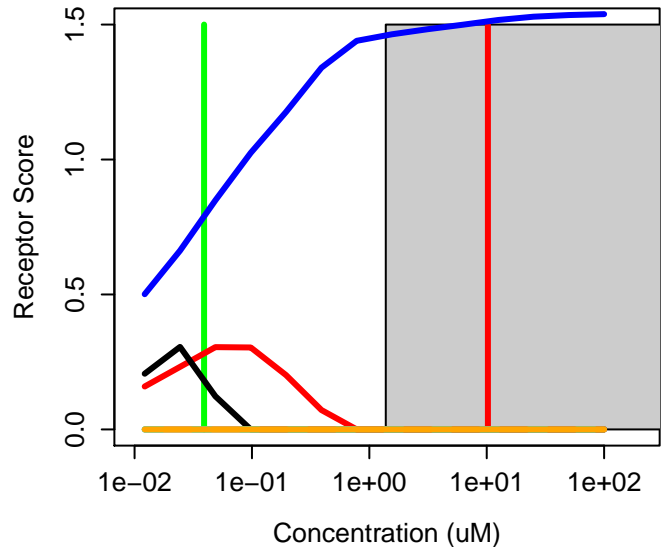

50-29-3 : p,p'-DDT

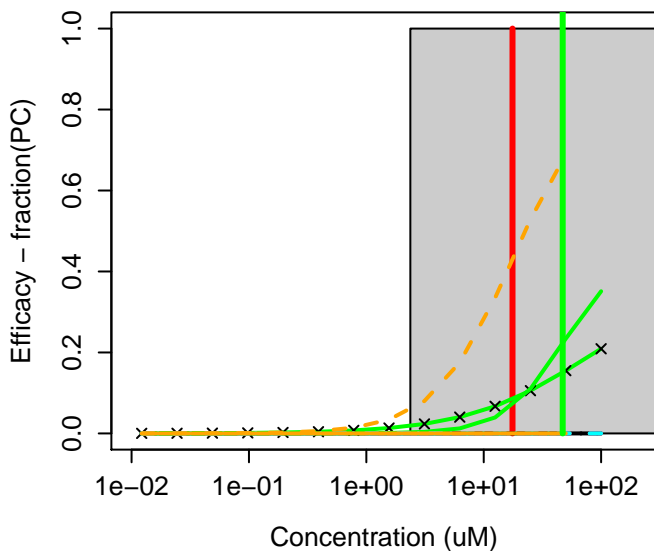

50-29-3 : p,p'-DDT  
Agonist: 0 Antagonist: 0.064

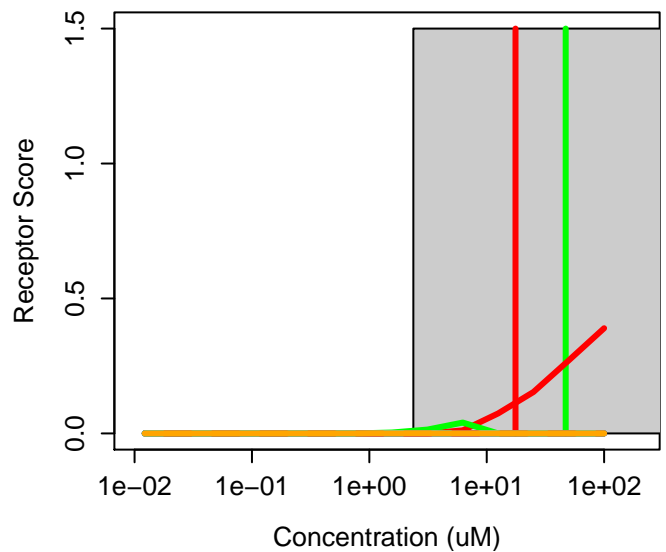

50-35-1 : Thalidomide



50-35-1 : Thalidomide  
Agonist: 0 Antagonist: 0



50-41-9 : Clomiphene citrate (1:1)

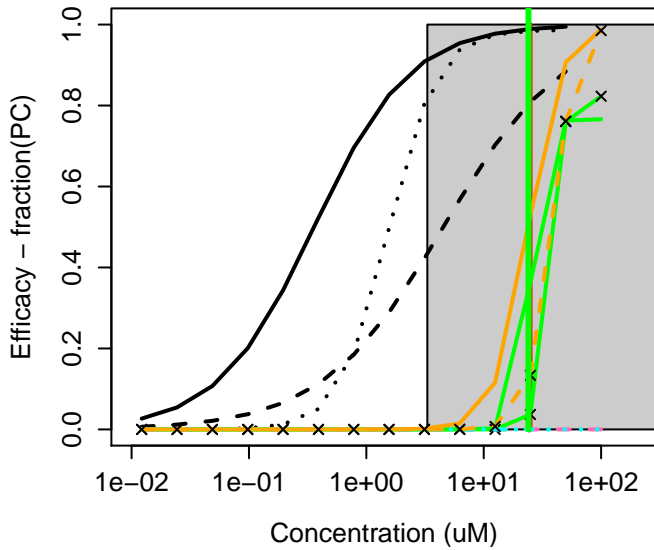

50-41-9 : Clomiphene citrate (1:1)  
Agonist: 0 Antagonist: 0.31

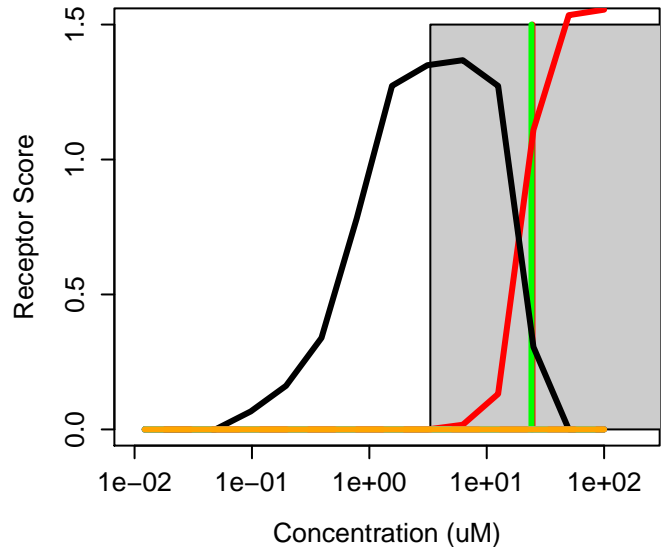

50471-44-8 : Vinclozolin

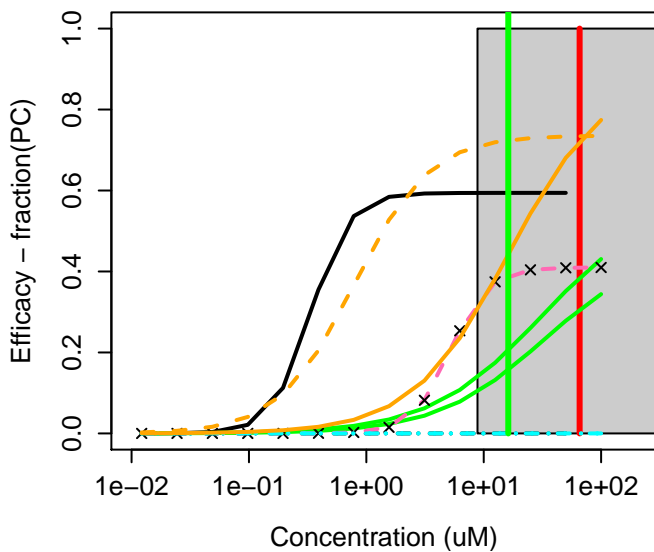

50471-44-8 : Vinclozolin  
Agonist: 0 Antagonist: 0.42

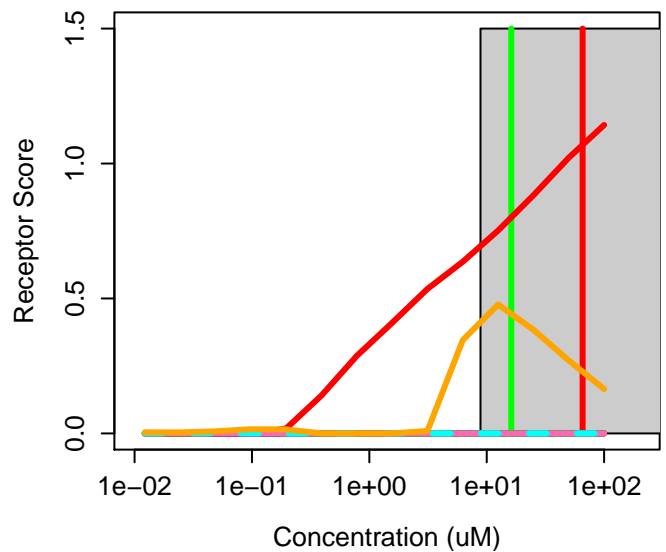

**50-55-5 : Reserpine**

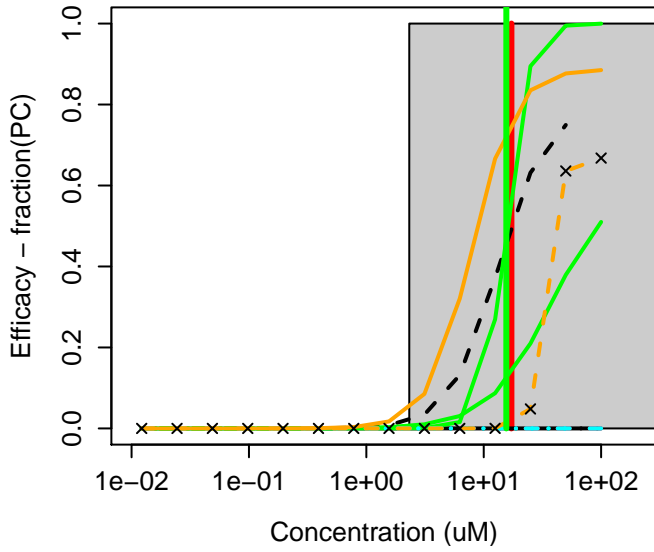

**50-55-5 : Reserpine**  
**Agonist: 0 Antagonist: 0.33**

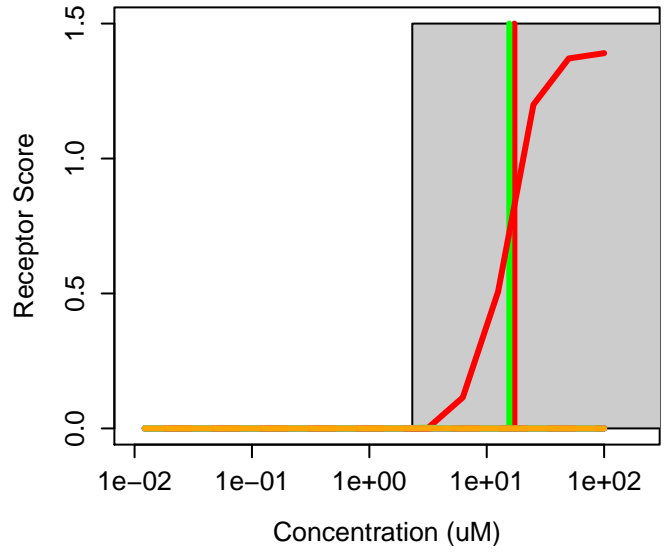

**50594-66-6 : Acifluorfen**

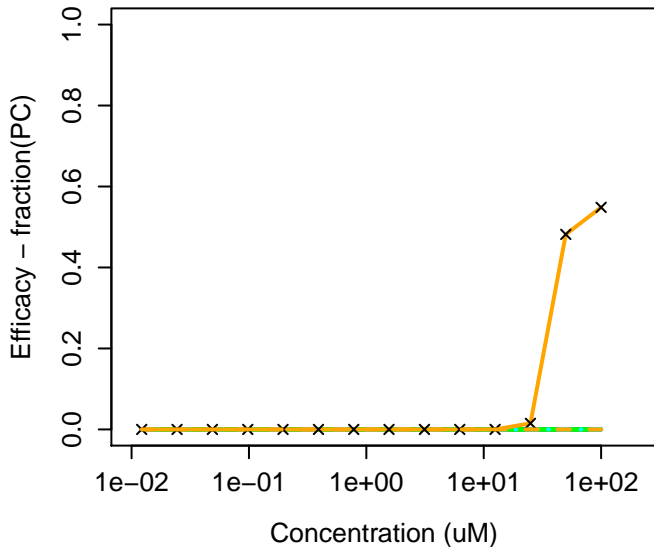

**50594-66-6 : Acifluorfen**  
**Agonist: 0 Antagonist: 0**

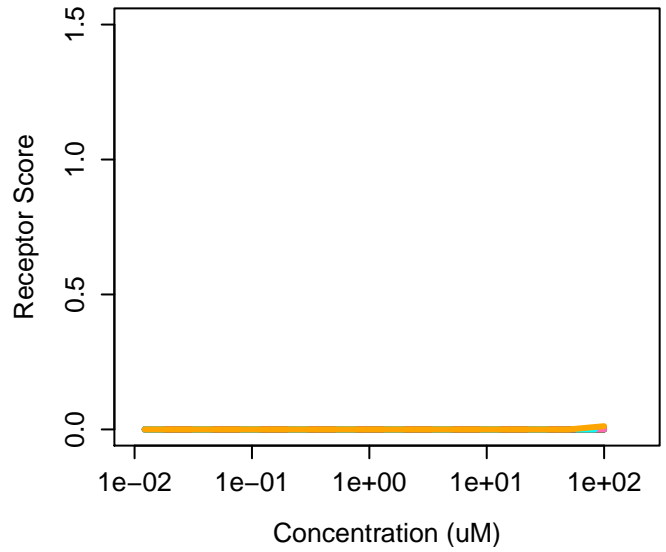

**50-65-7 : Niclosamide**

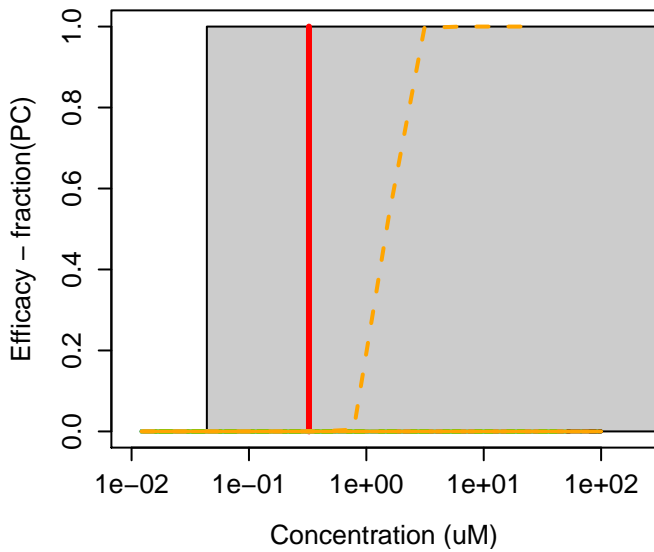

**50-65-7 : Niclosamide**  
**Agonist: 0 Antagonist: 0**

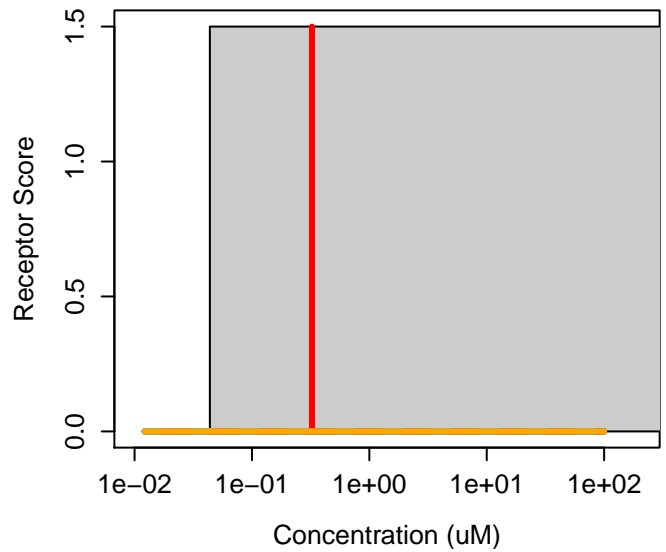

**50-70-4 : D-Glucitol**



**50-70-4 : D-Glucitol**  
**Agonist: 0 Antagonist: 0**



**50-78-2 : Aspirin**



**50-78-2 : Aspirin**  
**Agonist: 0 Antagonist: 0**



**50-81-7 : L-Ascorbic acid**



**50-81-7 : L-Ascorbic acid**  
**Agonist: 0 Antagonist: 0**



50892-23-4 : Pirinixic acid

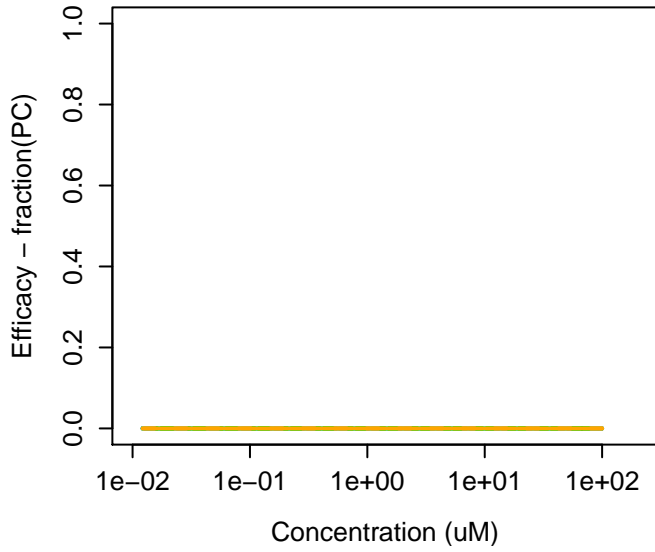

50892-23-4 : Pirinixic acid  
Agonist: 0 Antagonist: 0



510-15-6 : Chlorobenzilate

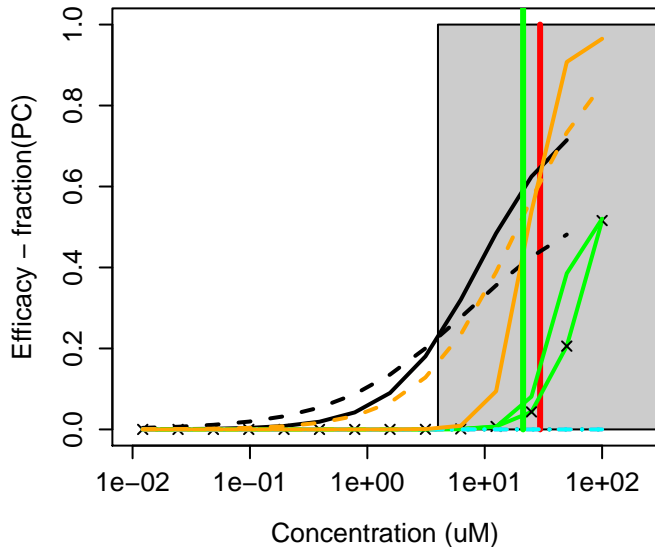

510-15-6 : Chlorobenzilate  
Agonist: 0 Antagonist: 0.33

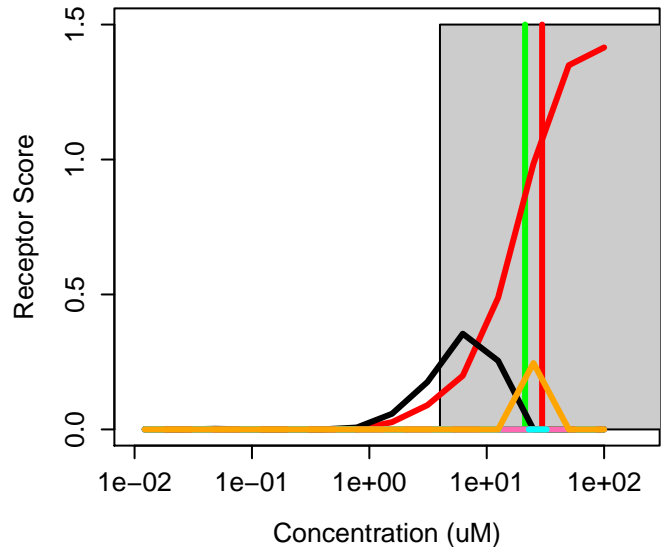

51-03-6 : Piperonyl butoxide

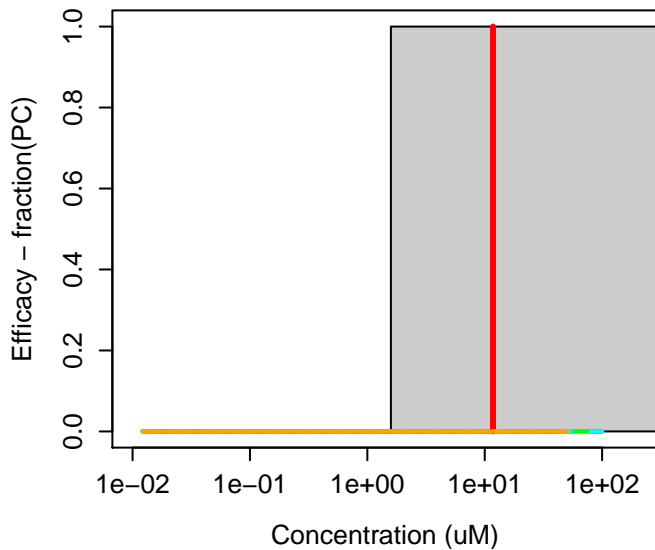

51-03-6 : Piperonyl butoxide  
Agonist: 0 Antagonist: 0

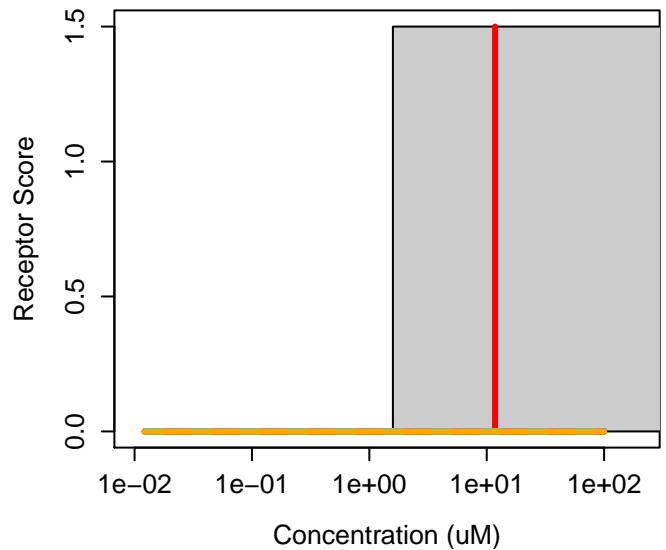

51-05-8 : Procaine hydrochloride

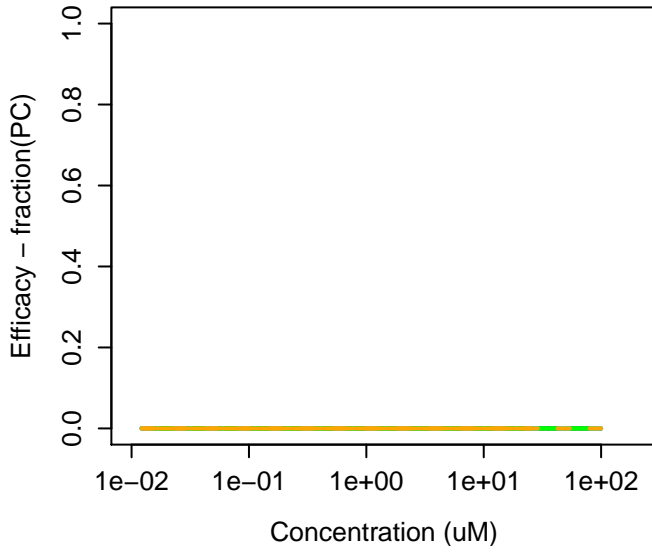

51-05-8 : Procaine hydrochloride  
Agonist: 0 Antagonist: 0



5116-94-9 : Monotridecyl phosphate

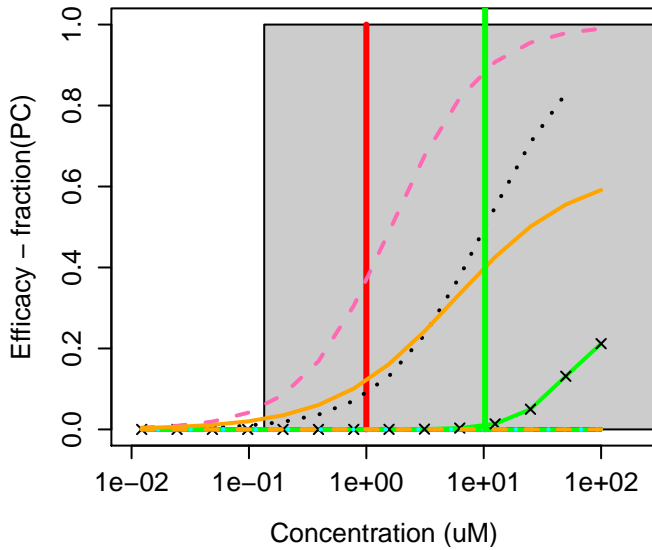

5116-94-9 : Monotridecyl phosphate  
Agonist: 0.13 Antagonist: 0.049

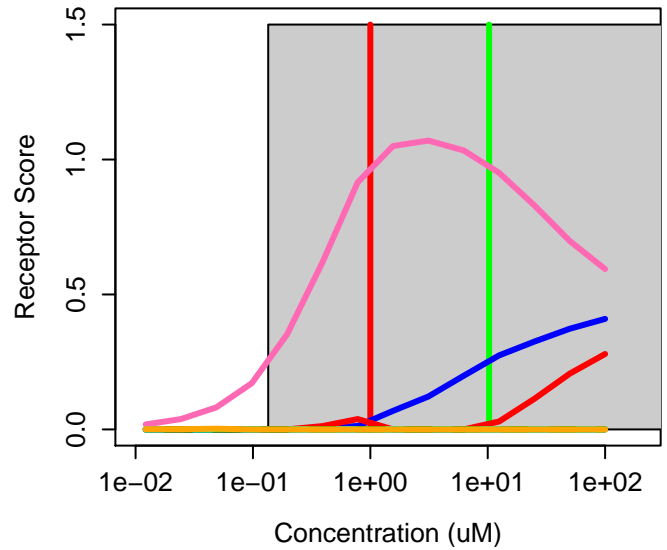

51-21-8 : 5-Fluorouracil

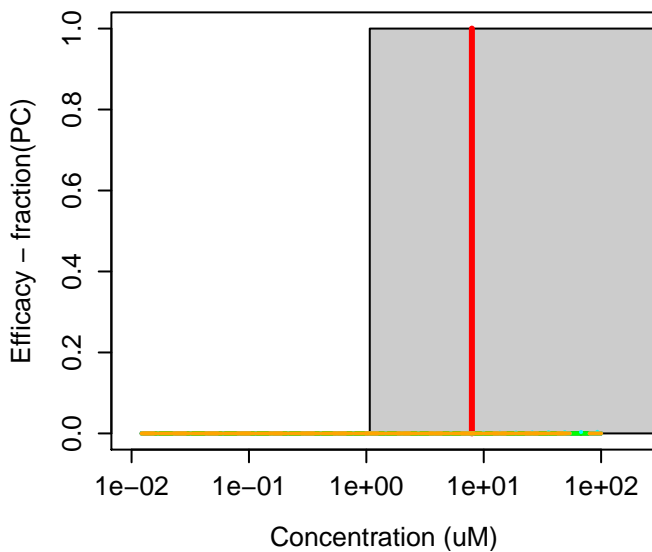

51-21-8 : 5-Fluorouracil  
Agonist: 0 Antagonist: 0

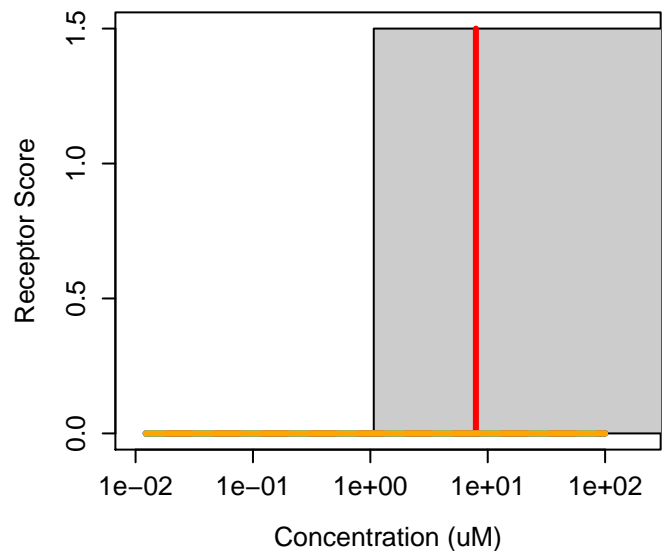



51218-45-2 : Metolachlor

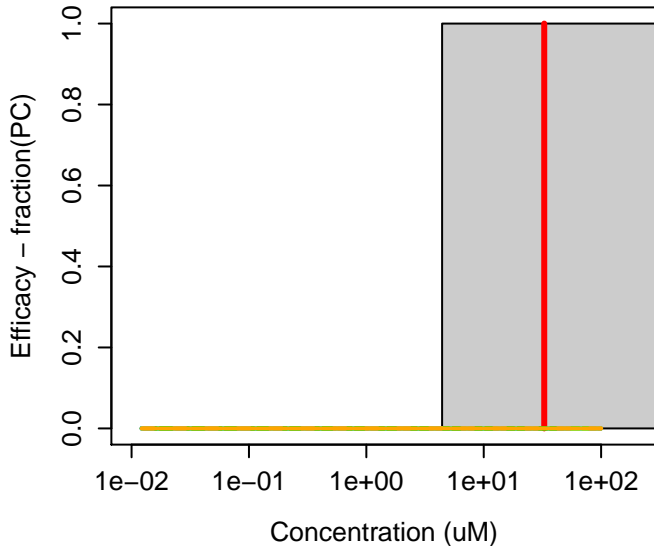

51218-45-2 : Metolachlor  
Agonist: 0 Antagonist: 0

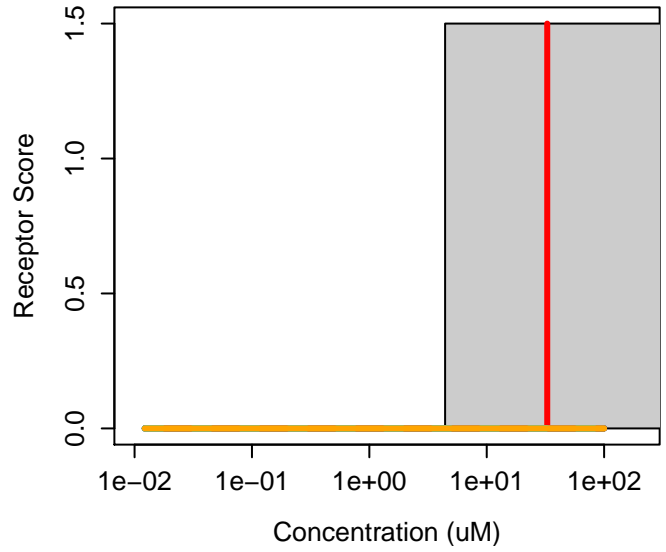

51229-78-8 : Chloroallyl methenamine chloride

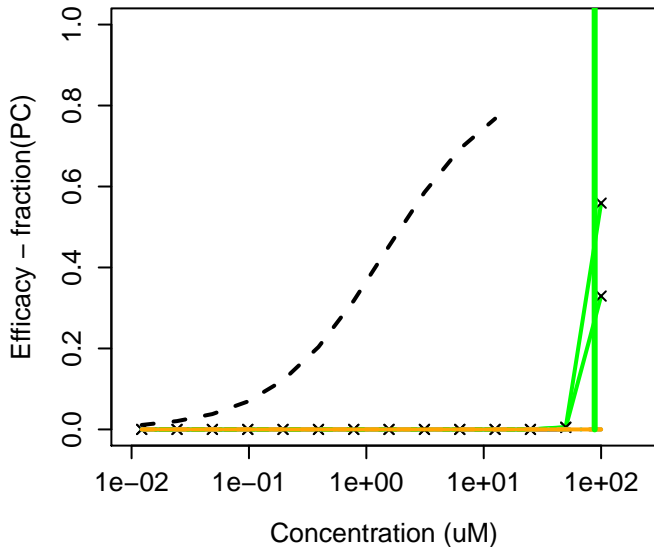

51229-78-8 : Chloroallyl methenamine chloride  
Agonist: 0.017 Antagonist: 0.034

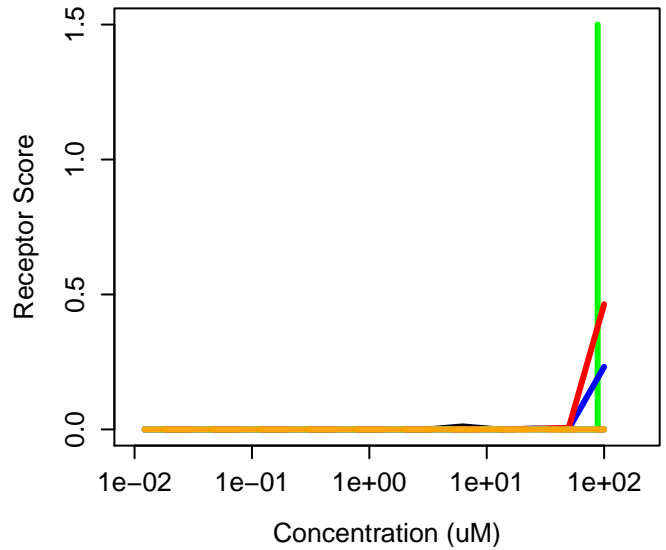

51235-04-2 : Hexazinone

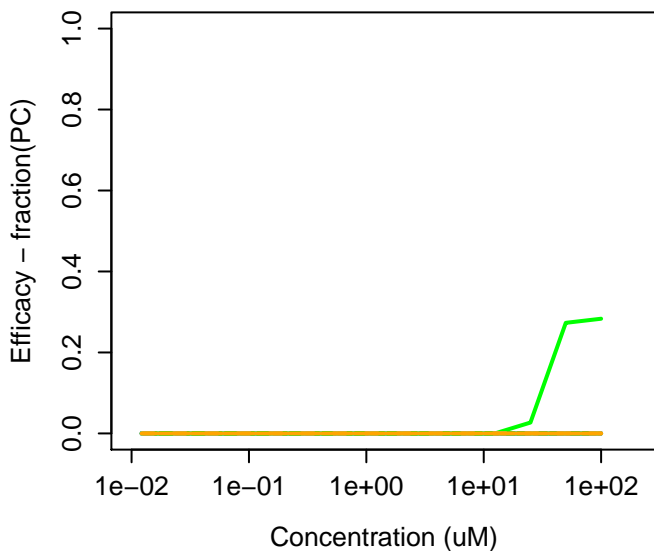

51235-04-2 : Hexazinone  
Agonist: 0 Antagonist: 0

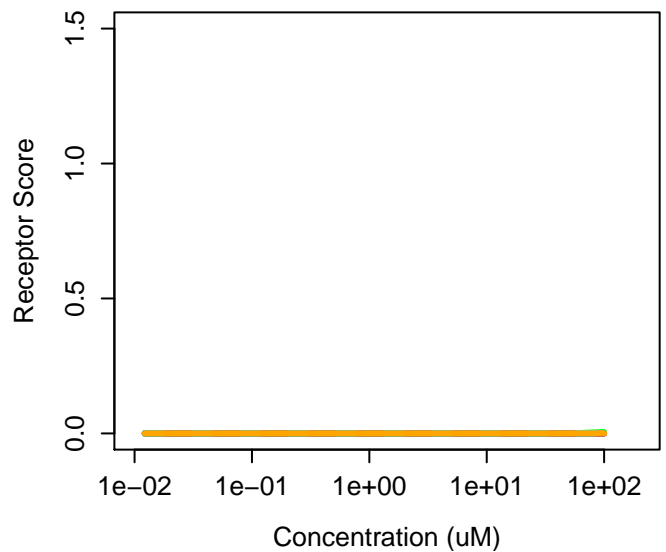

51-24-1 : Tiratricol

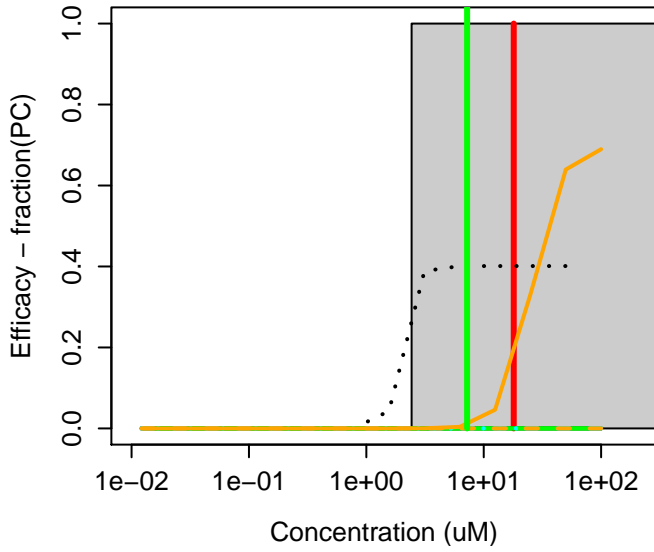

51-24-1 : Tiratricol  
Agonist: 0 Antagonist: 0.055

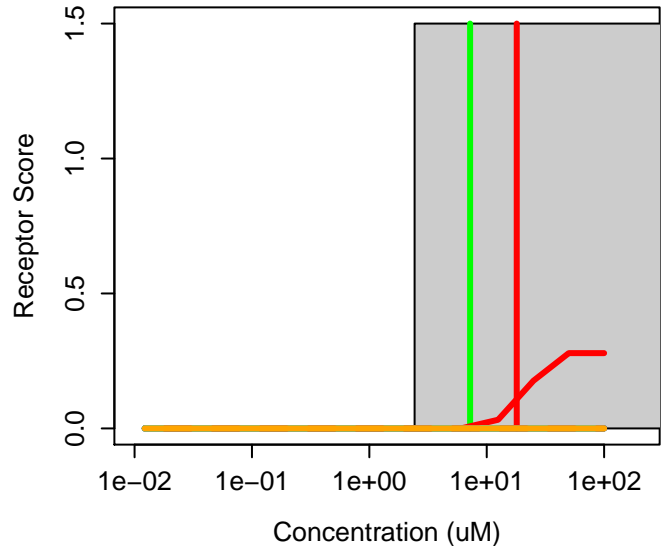

512-42-5 : Sodium methyl sulfate



512-42-5 : Sodium methyl sulfate  
Agonist: 0 Antagonist: 0



512-56-1 : Trimethyl phosphate



512-56-1 : Trimethyl phosphate  
Agonist: 0 Antagonist: 0



**51-28-5 : 2,4-Dinitrophenol**

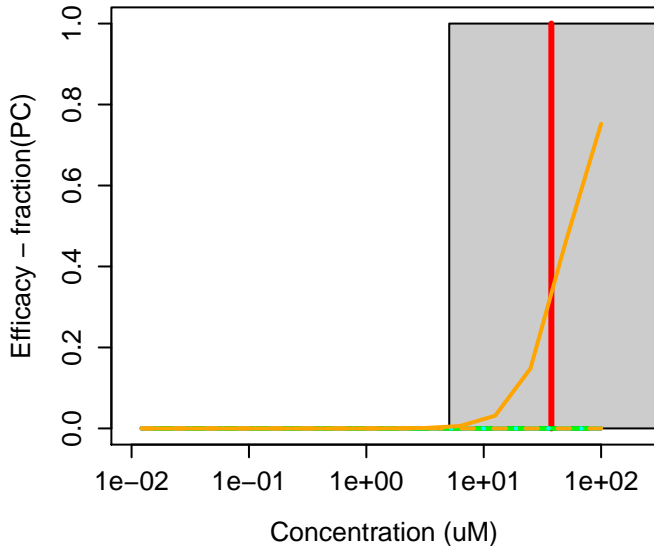

**51-28-5 : 2,4-Dinitrophenol  
Agonist: 0 Antagonist: 0**

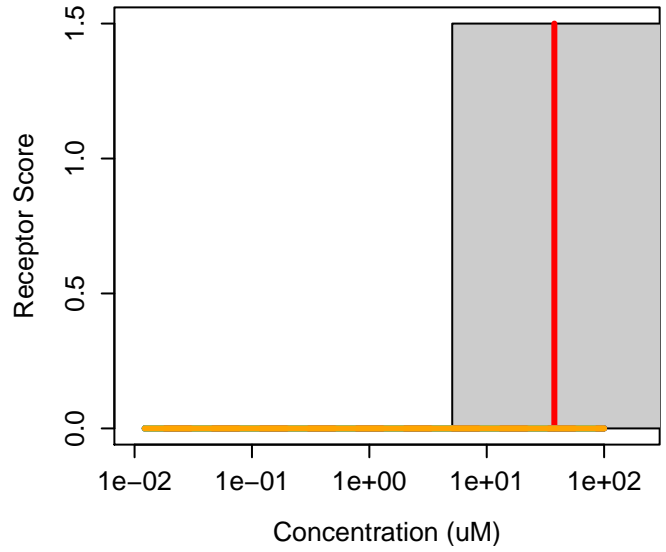

**51-30-9 : Isoproterenol hydrochloride**

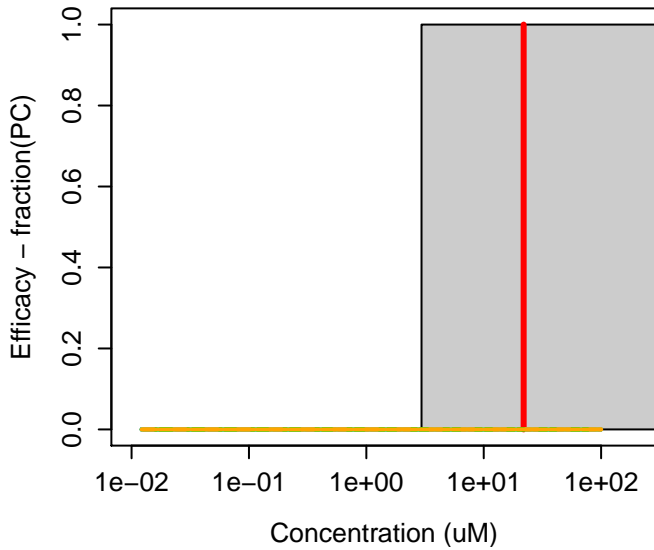

**51-30-9 : Isoproterenol hydrochloride  
Agonist: 0 Antagonist: 0**

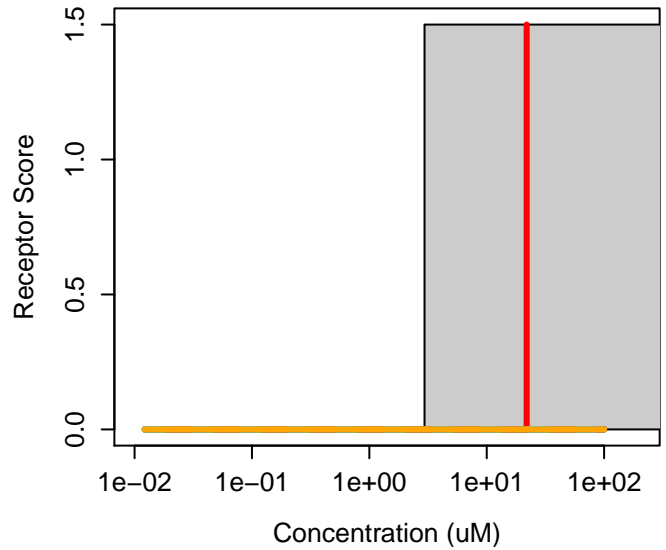

**51338-27-3 : Diclofop-methyl**

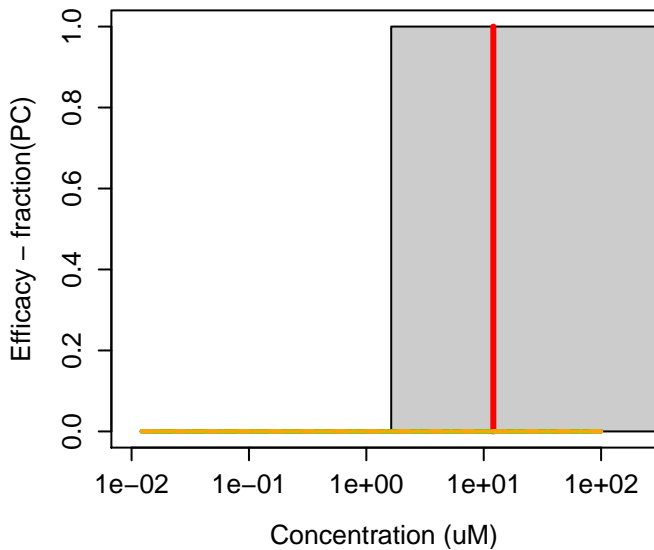

**51338-27-3 : Diclofop-methyl  
Agonist: 0 Antagonist: 0**

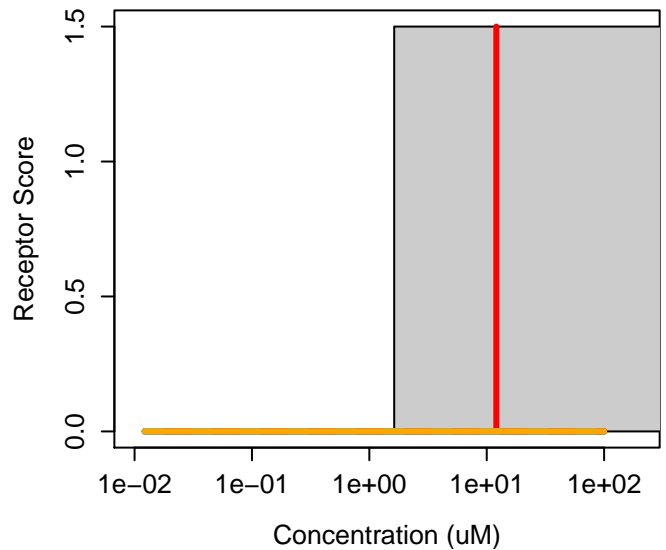

5137-55-3 : Methyltrioctylammonium chloride

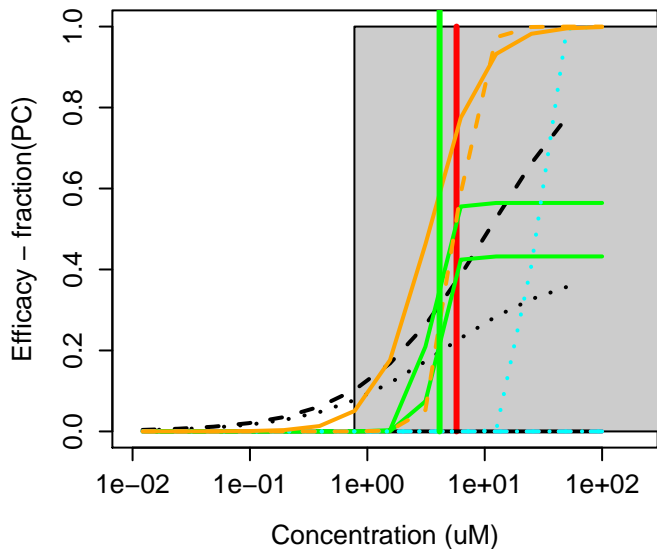

5137-55-3 : Methyltrioctylammonium chloride  
Agonist: 0 Antagonist: 0.54

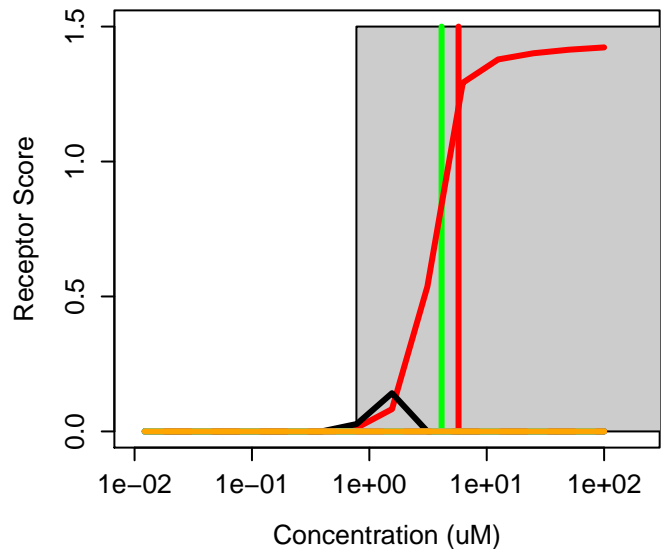

5138-18-1 : Sulfosuccinic acid

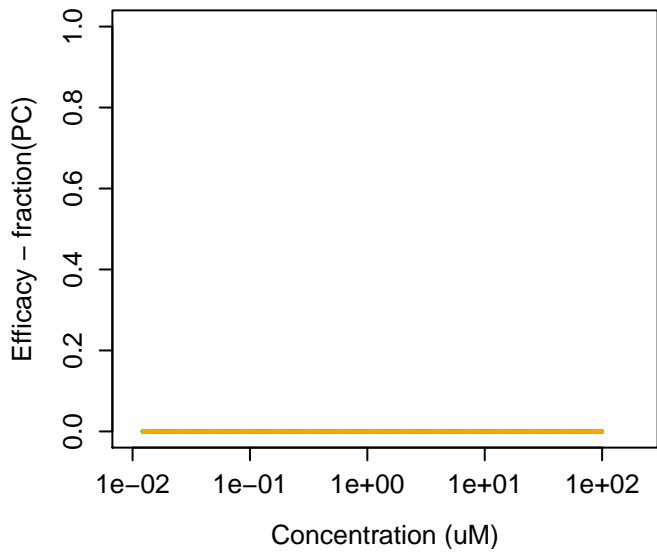

5138-18-1 : Sulfosuccinic acid  
Agonist: 0 Antagonist: 0



5146-66-7 : 3,7-Dimethyl-2,6-octadienenitrile



5146-66-7 : 3,7-Dimethyl-2,6-octadienenitrile  
Agonist: 0 Antagonist: 0



51-52-5 : 6-Propyl-2-thiouracil



51-52-5 : 6-Propyl-2-thiouracil  
Agonist: 0 Antagonist: 0



5153-25-3 : 2-Ethylhexylparaben

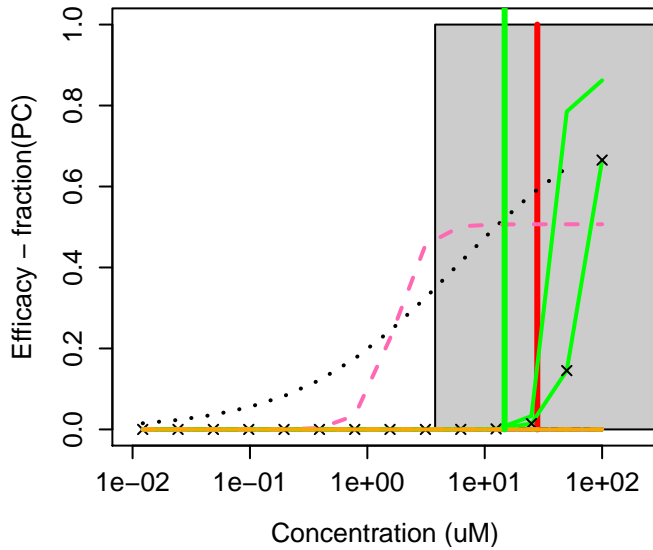

5153-25-3 : 2-Ethylhexylparaben  
Agonist: 0.15 Antagonist: 0.025

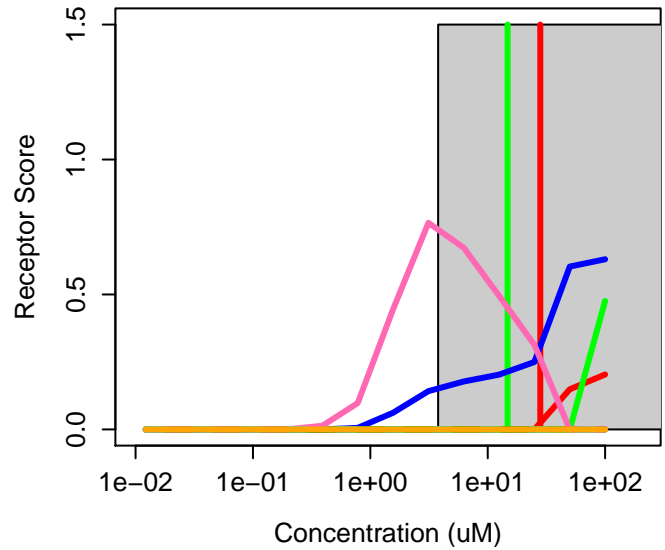

51580-86-0 : Sodium dichloro-s-triazinetriene dihy 51580-86-0 : Sodium dichloro-s-triazinetriene dihy  
Agonist: 0 Antagonist: 0



51630-58-1 : Fenvalerate

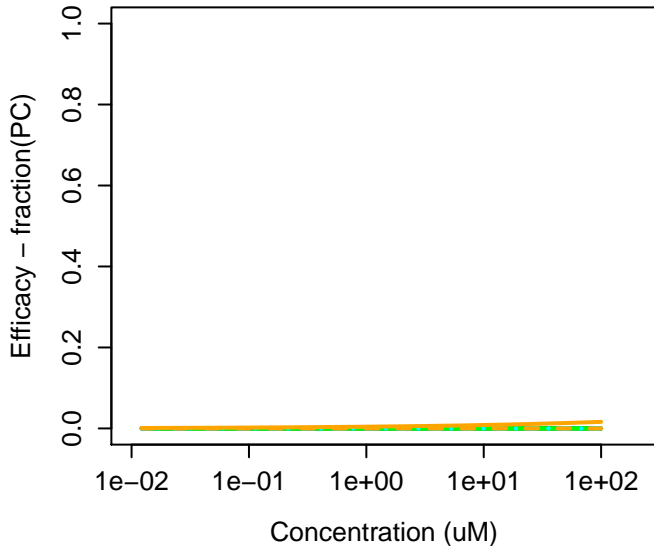

51630-58-1 : Fenvalerate  
Agonist: 0 Antagonist: 0

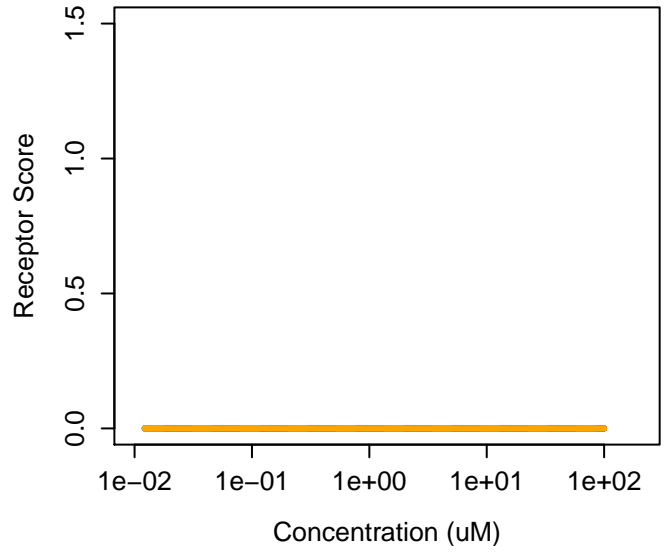

51632-16-7 : 1-(Bromomethyl)-3-phenoxybenze

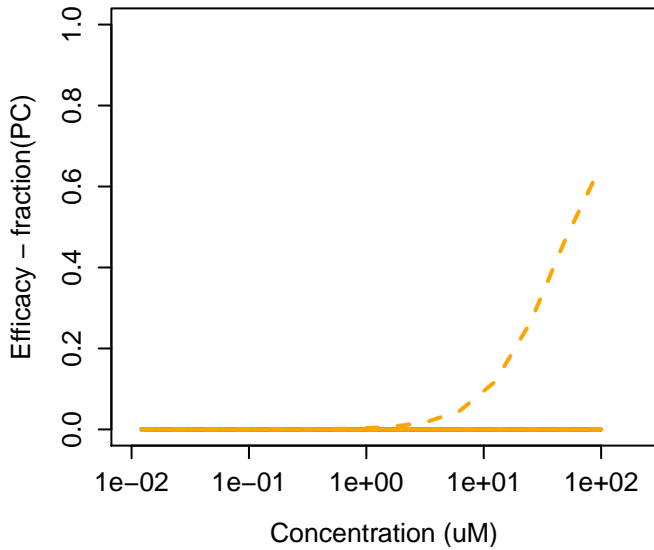

51632-16-7 : 1-(Bromomethyl)-3-phenoxybenze  
Agonist: 0 Antagonist: 0

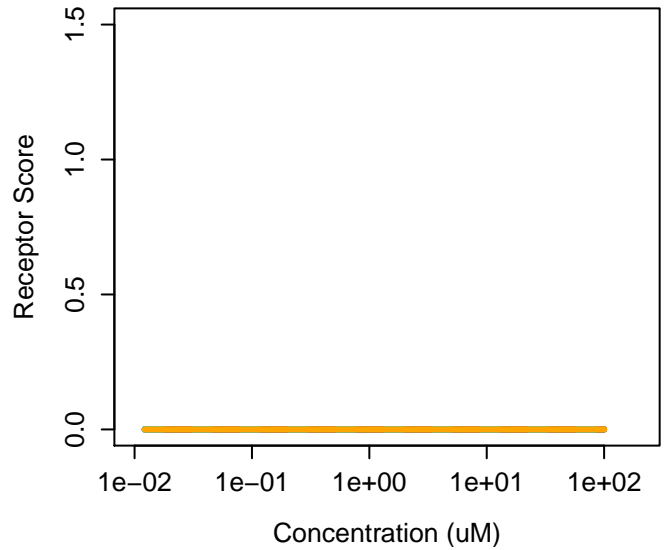

51707-55-2 : Thidiazuron

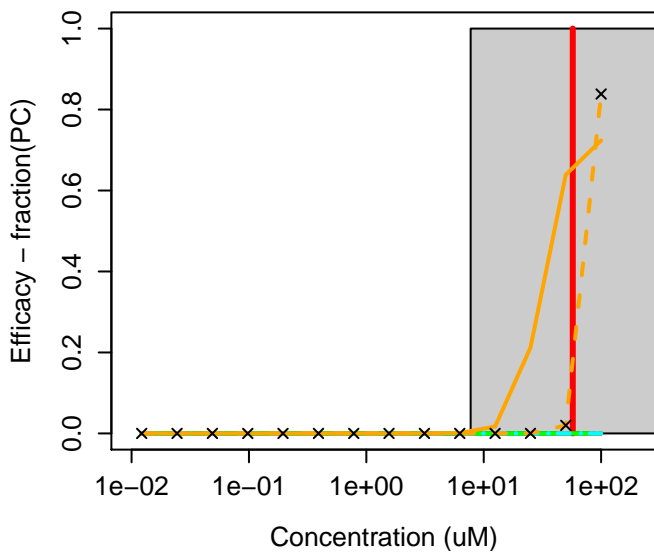

51707-55-2 : Thidiazuron  
Agonist: 0 Antagonist: 0

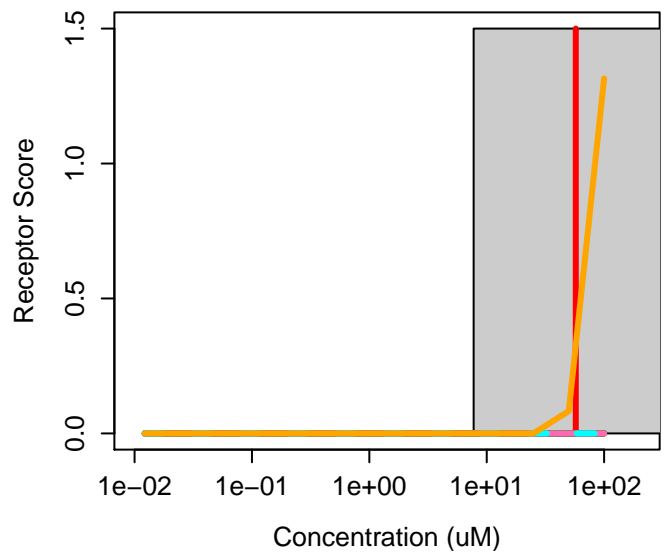

51-79-6 : Urethane



51-79-6 : Urethane  
Agonist: 0 Antagonist: 0



52-01-7 : Spironolactone

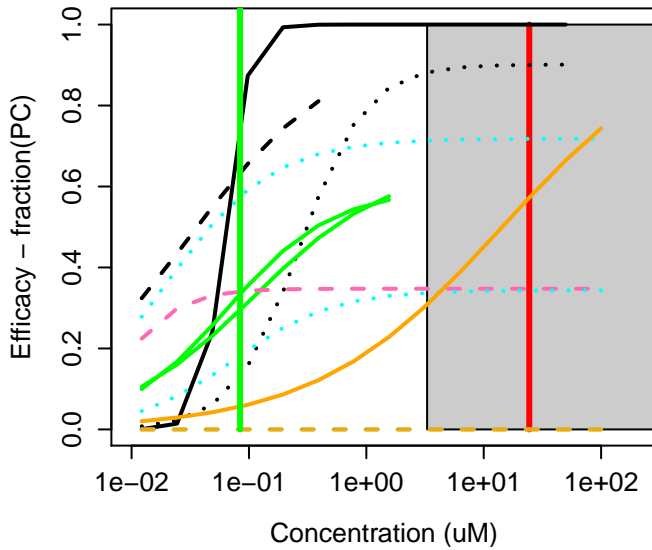

52-01-7 : Spironolactone  
Agonist: 0 Antagonist: 0.19

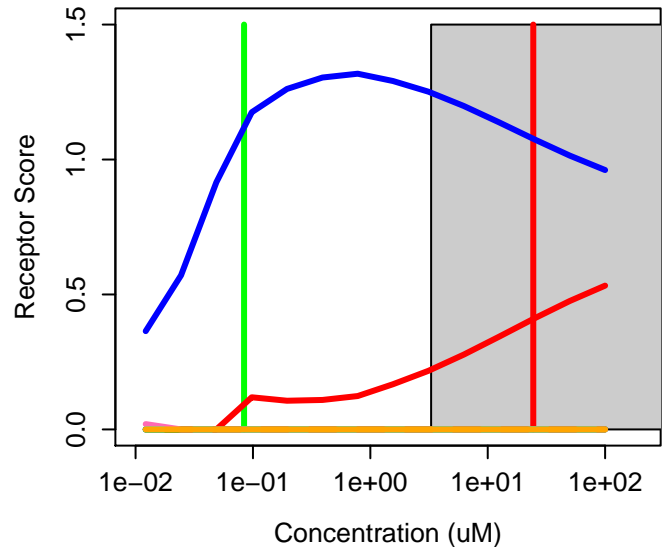

520-18-3 : Kaempferol

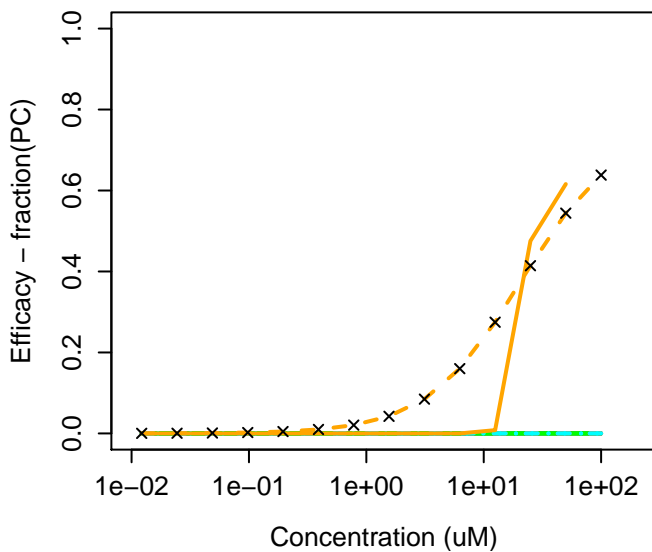

520-18-3 : Kaempferol  
Agonist: 0 Antagonist: 0

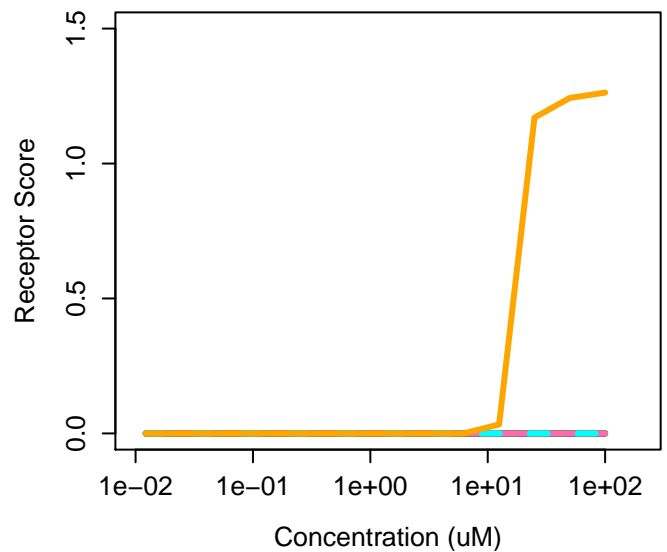

520-36-5 : Apigenin

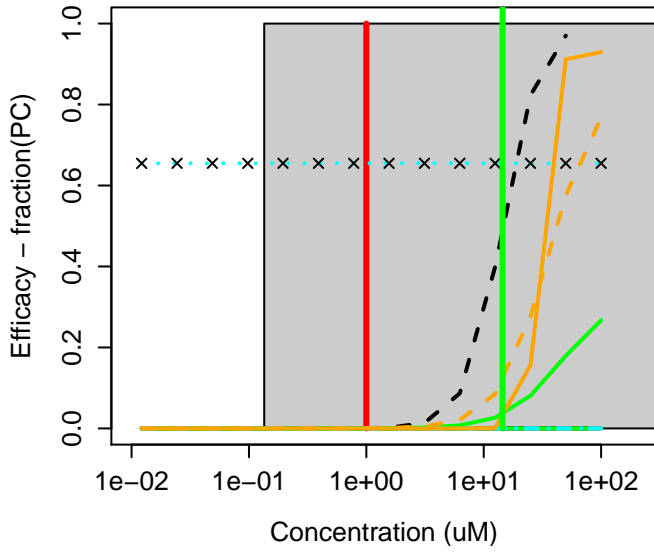

520-36-5 : Apigenin  
Agonist: 0.04 Antagonist: 0.16

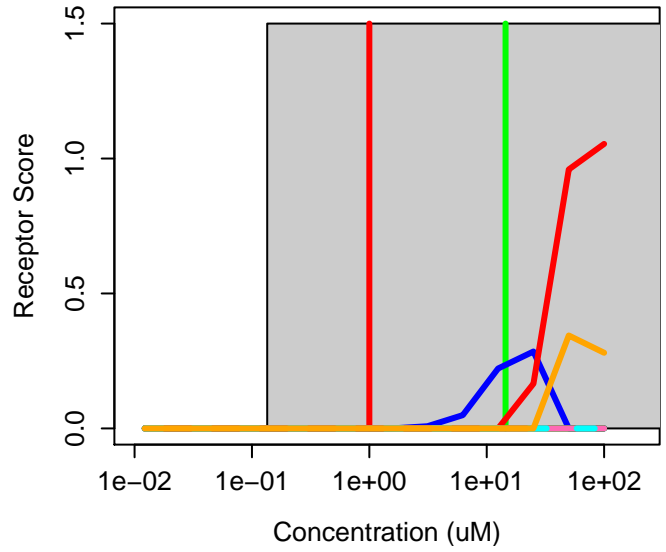

520-45-6 : Dehydroacetic acid



520-45-6 : Dehydroacetic acid  
Agonist: 0 Antagonist: 0



521-18-6 : 5alpha-Dihydrotestosterone

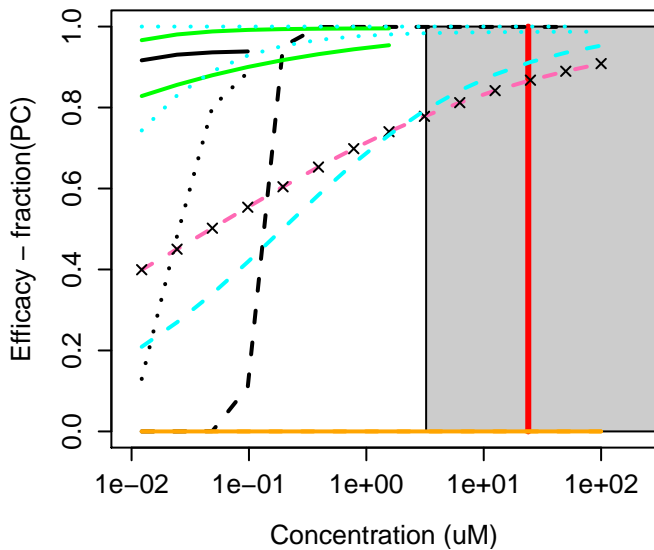

521-18-6 : 5alpha-Dihydrotestosterone  
Agonist: 1.6 Antagonist: 0

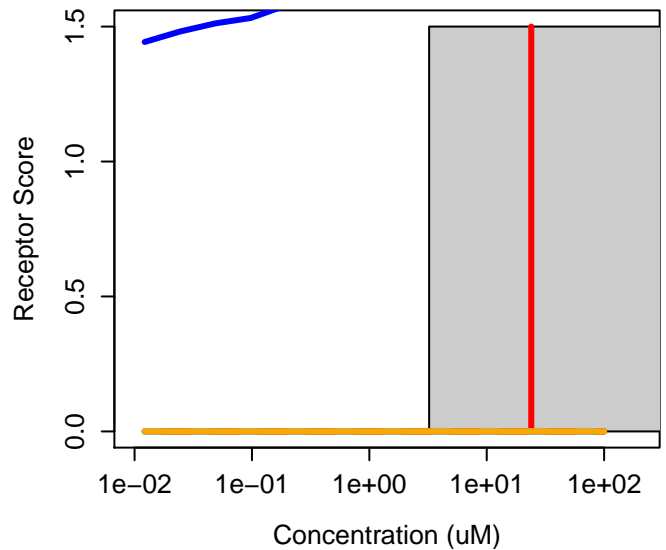



5216-25-1 : 4-Chlorobenzotrichloride



5216-25-1 : 4-Chlorobenzotrichloride  
Agonist: 0 Antagonist: 0



52225-20-4 : dl-alpha-Tocopheryl acetate



52225-20-4 : dl-alpha-Tocopheryl acetate  
Agonist: 0 Antagonist: 0



52315-07-8 : Cypermethrin

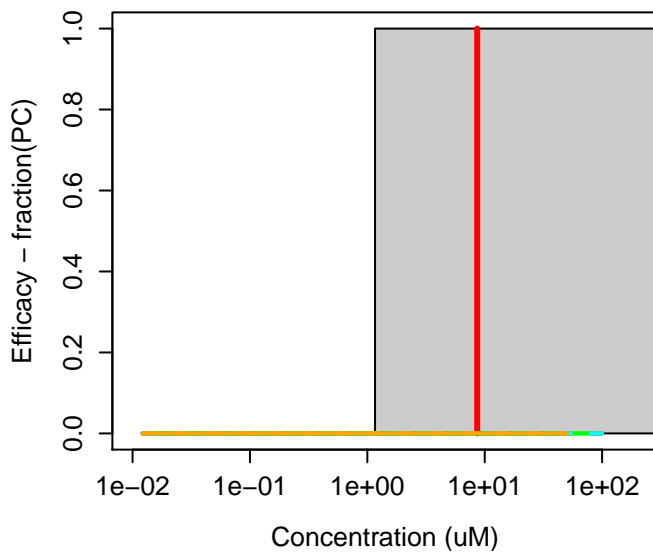

52315-07-8 : Cypermethrin  
Agonist: 0 Antagonist: 0

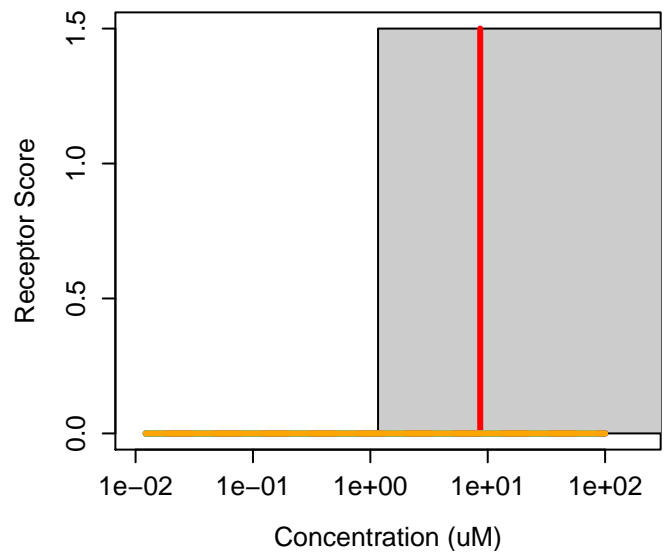

5234-68-4 : Carboxin



5234-68-4 : Carboxin  
Agonist: 0 Antagonist: 0



52-51-7 : Bronopol

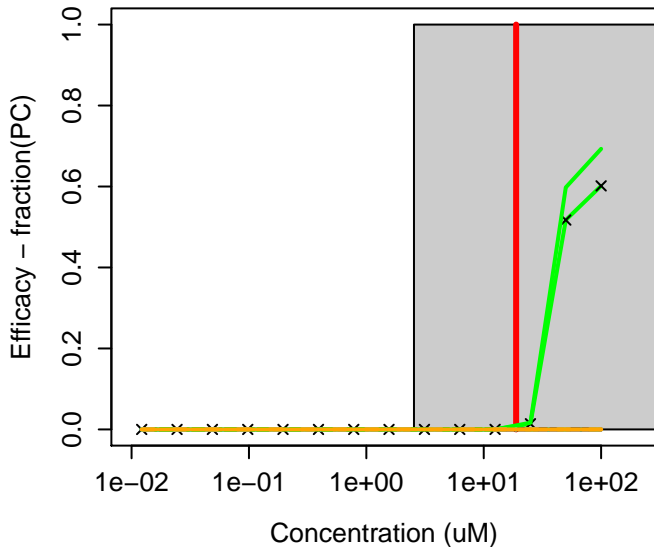

52-51-7 : Bronopol  
Agonist: 0 Antagonist: 0

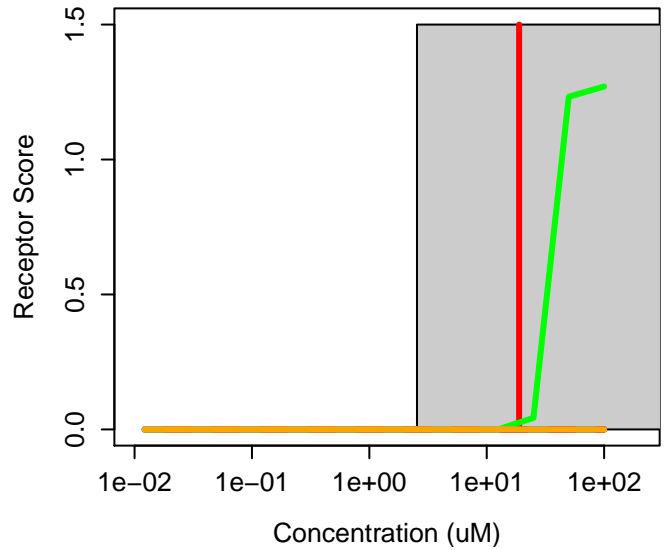

525-79-1 : Kinetin



525-79-1 : Kinetin  
Agonist: 0 Antagonist: 0



525-82-6 : Flavone

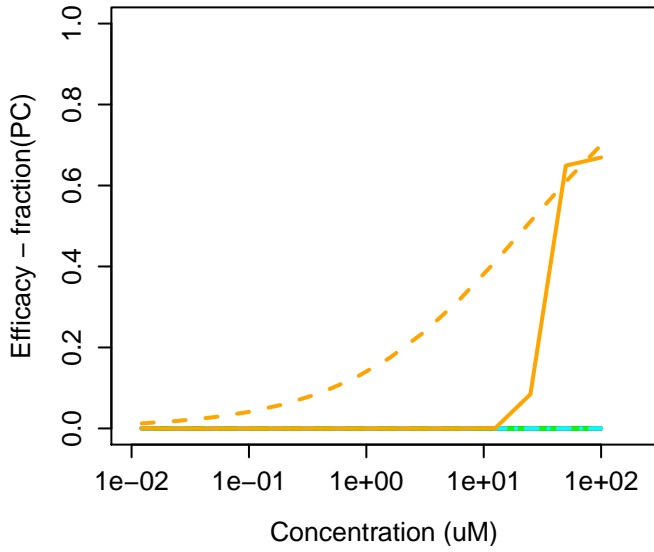

525-82-6 : Flavone  
Agonist: 0 Antagonist: 0

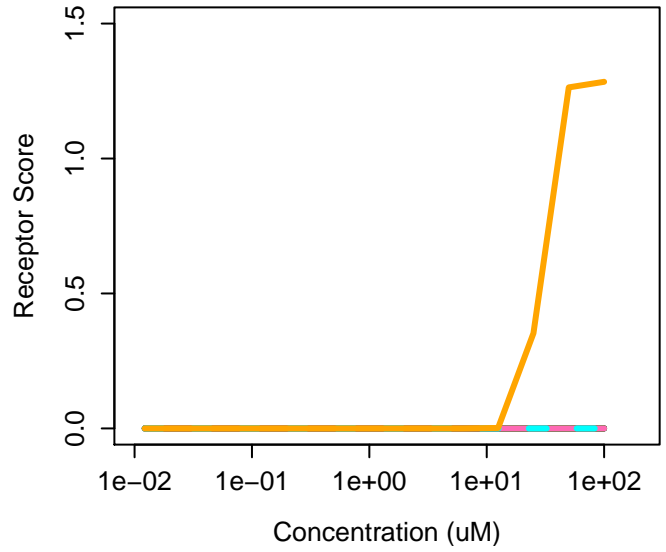

52645-53-1 : Permethrin

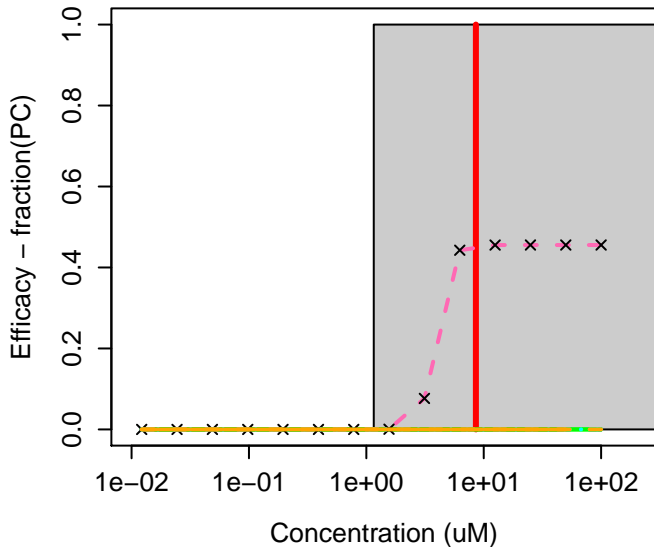

52645-53-1 : Permethrin  
Agonist: 0 Antagonist: 0

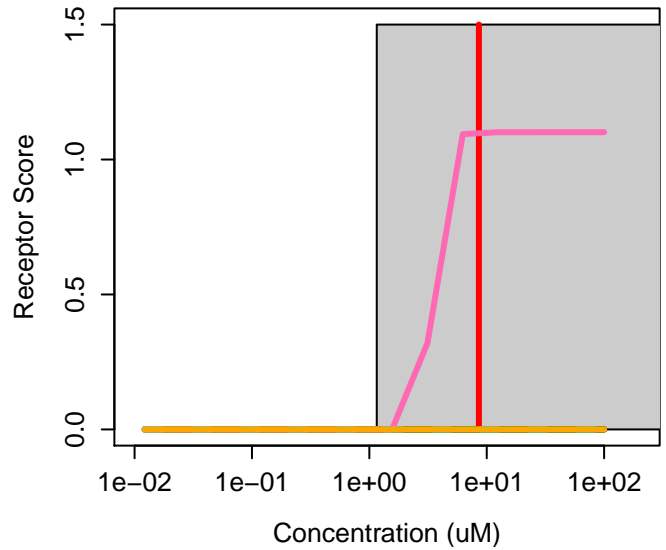

526-75-0 : 2,3-Dimethylphenol



526-75-0 : 2,3-Dimethylphenol  
Agonist: 0 Antagonist: 0



52-68-6 : Trichlorfon

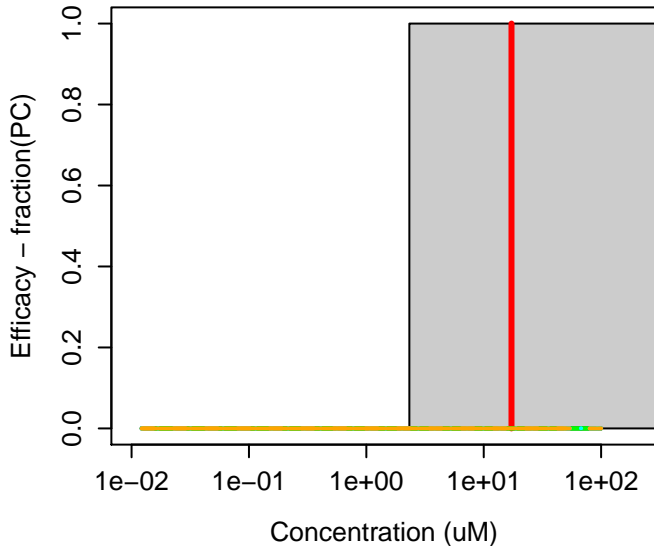

52-68-6 : Trichlorfon  
Agonist: 0 Antagonist: 0

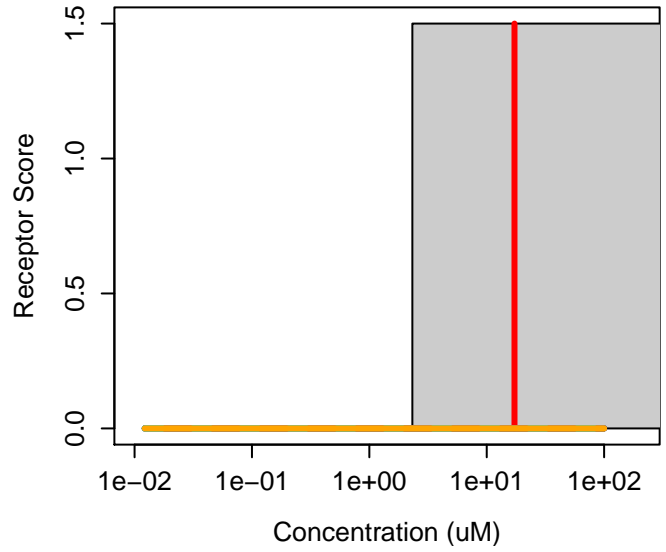

527-60-6 : 2,4,6-Trimethylphenol



527-60-6 : 2,4,6-Trimethylphenol  
Agonist: 0 Antagonist: 0



527680-56-4 : PHA-00568487

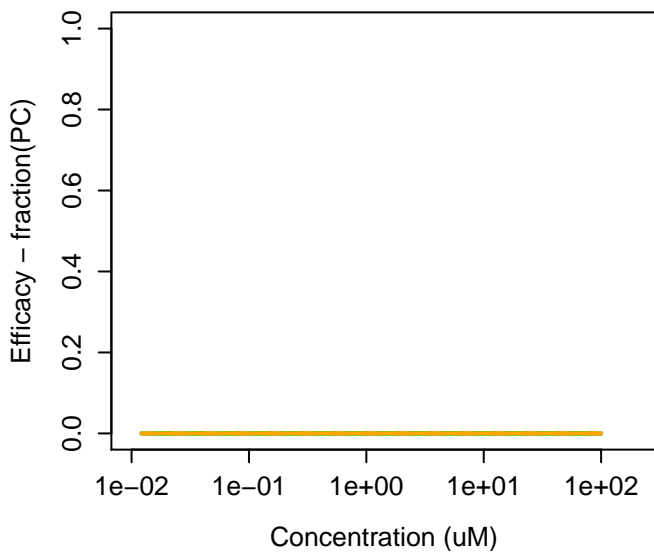

527680-56-4 : PHA-00568487  
Agonist: 0 Antagonist: 0



52806-53-8 : Hydroxyflutamide

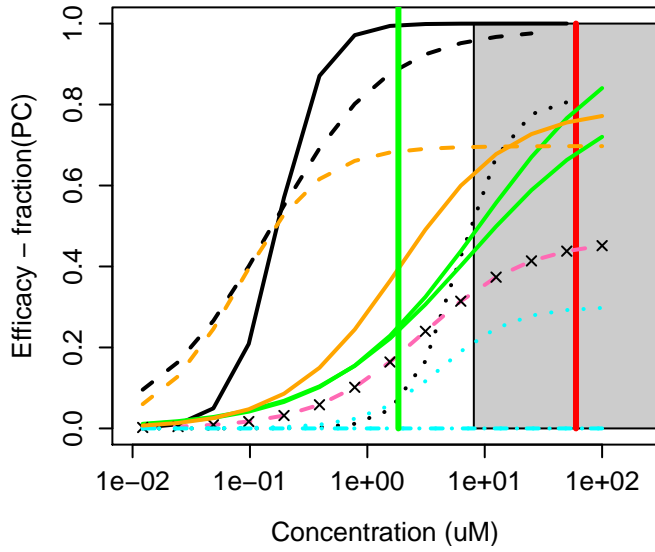

52806-53-8 : Hydroxyflutamide  
Agonist: 0.0011 Antagonist: 1

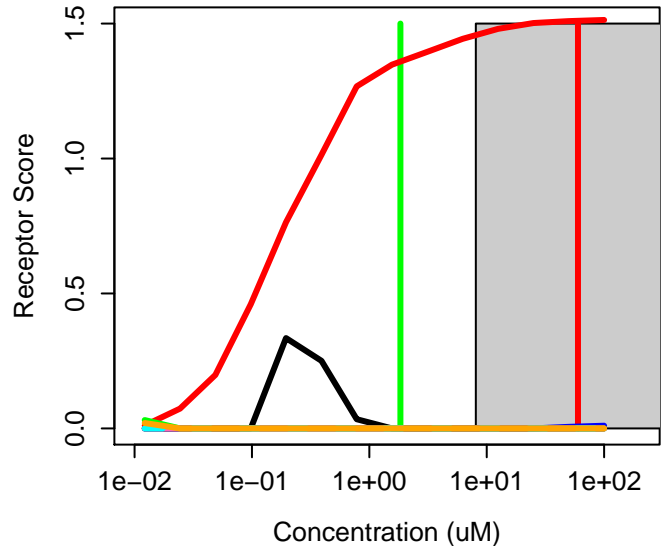

528-29-0 : 1,2-Dinitrobenzene

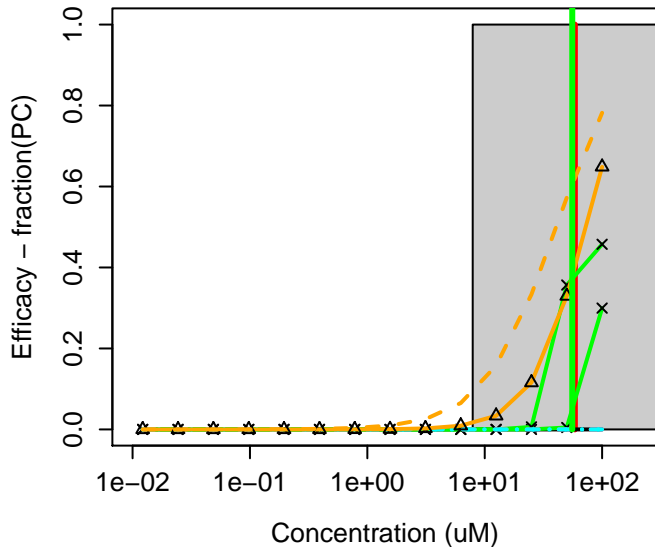

528-29-0 : 1,2-Dinitrobenzene  
Agonist: 0 Antagonist: 0.067

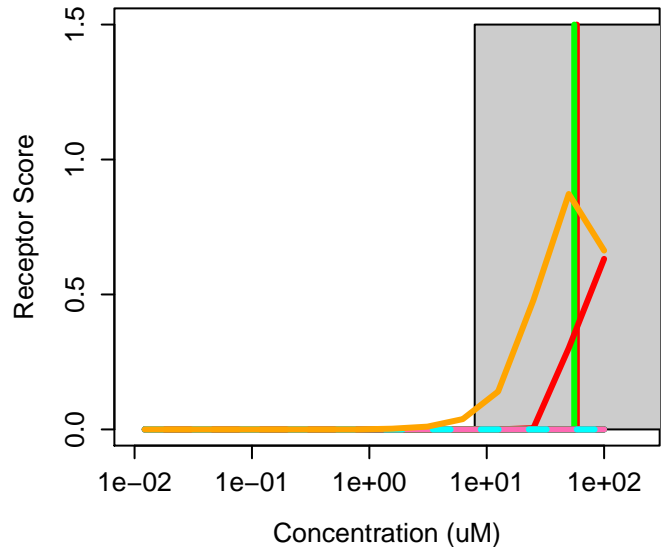

52-86-8 : Haloperidol

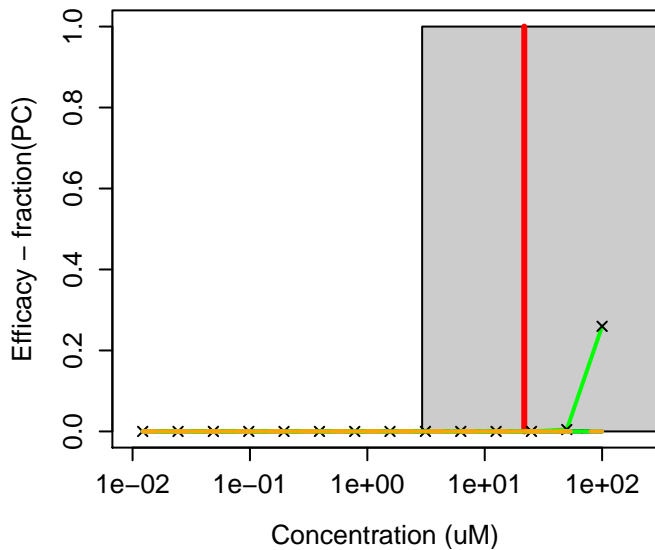

52-86-8 : Haloperidol  
Agonist: 0 Antagonist: 0

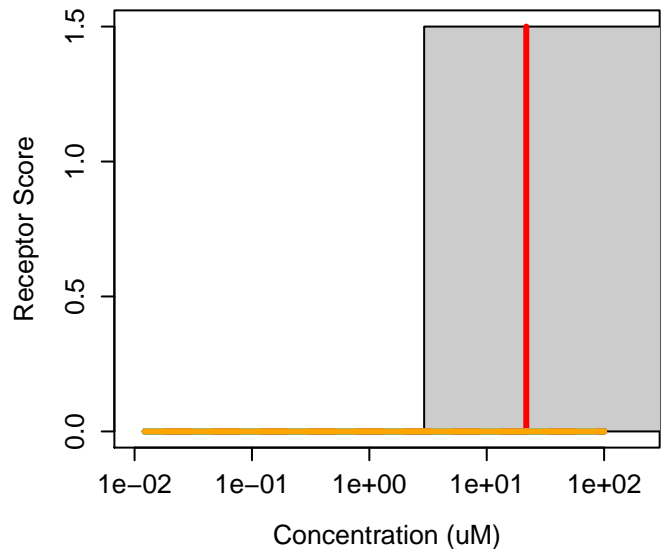

52918-63-5 : Deltamethrin

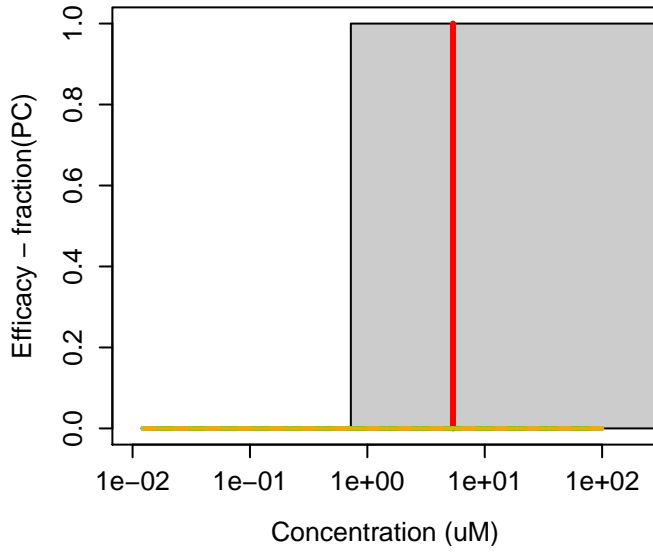

52918-63-5 : Deltamethrin  
Agonist: 0 Antagonist: 0

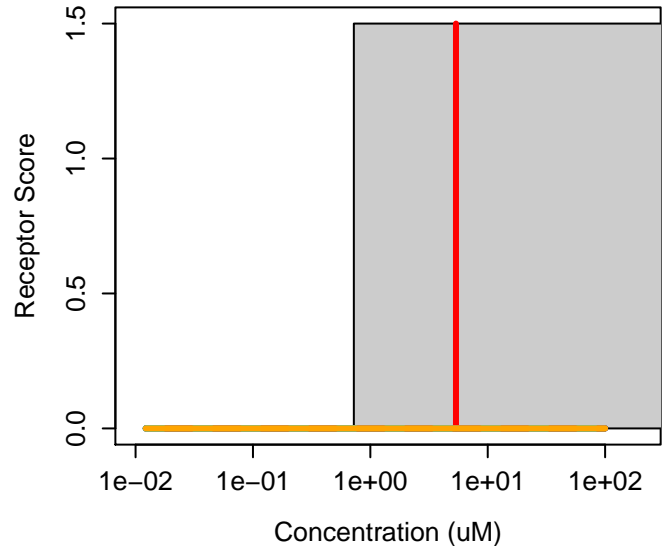

53-03-2 : Prednisone

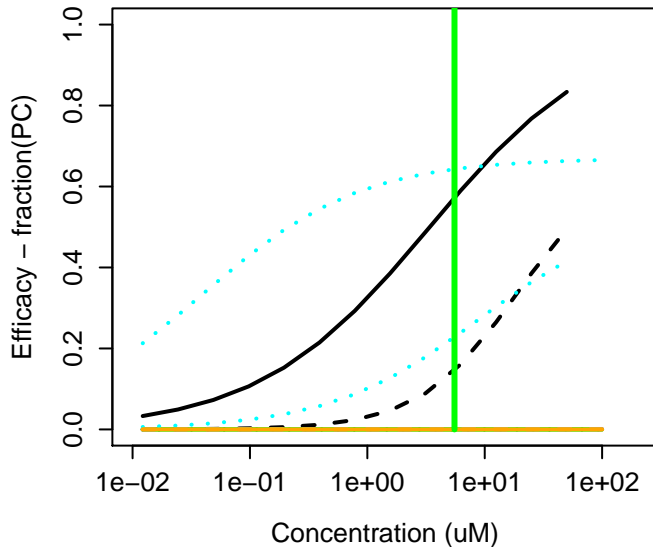

53-03-2 : Prednisone  
Agonist: 0.33 Antagonist: 0

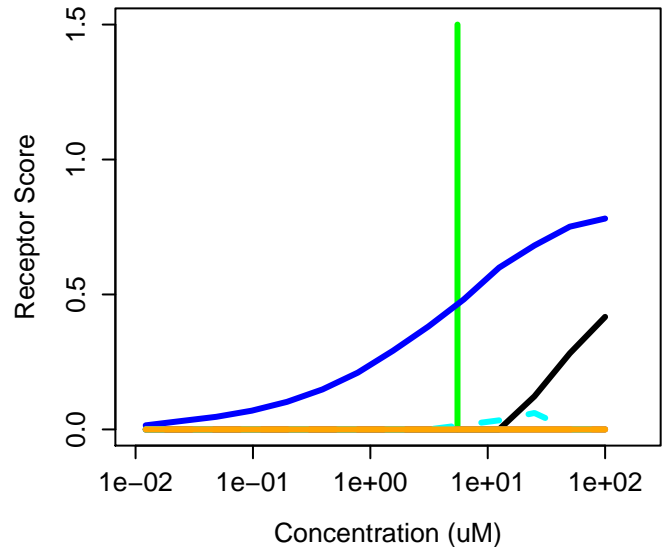

53112-28-0 : Pyrimethanil



53112-28-0 : Pyrimethanil  
Agonist: 0 Antagonist: 0



5315-79-7 : 1-Hydroxypyrene

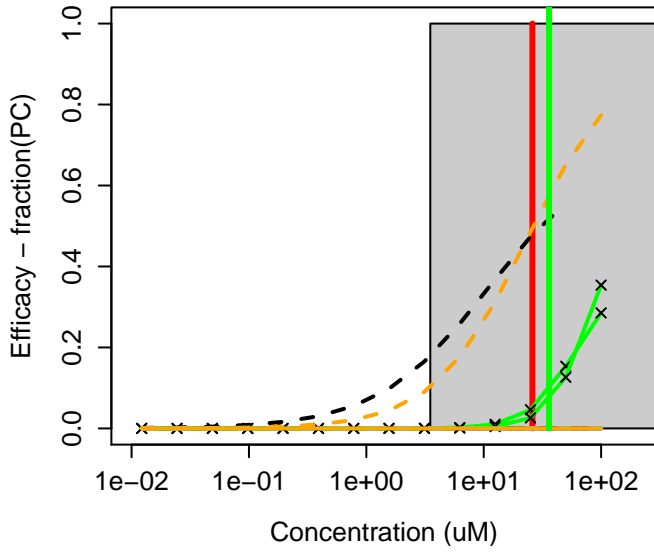

5315-79-7 : 1-Hydroxypyrene  
Agonist: 0 Antagonist: 0.14

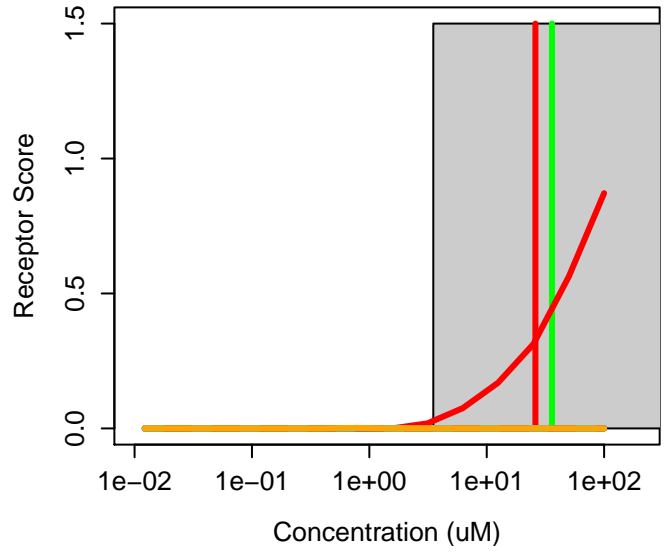

53-16-7 : Estrone

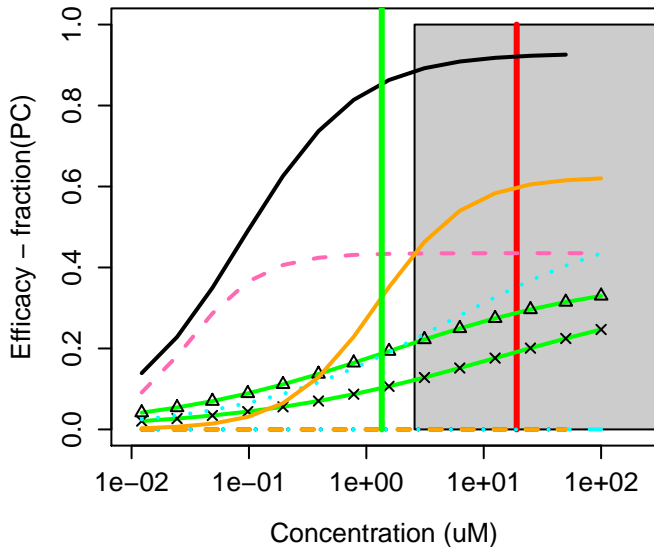

53-16-7 : Estrone  
Agonist: 0.28 Antagonist: 0.2

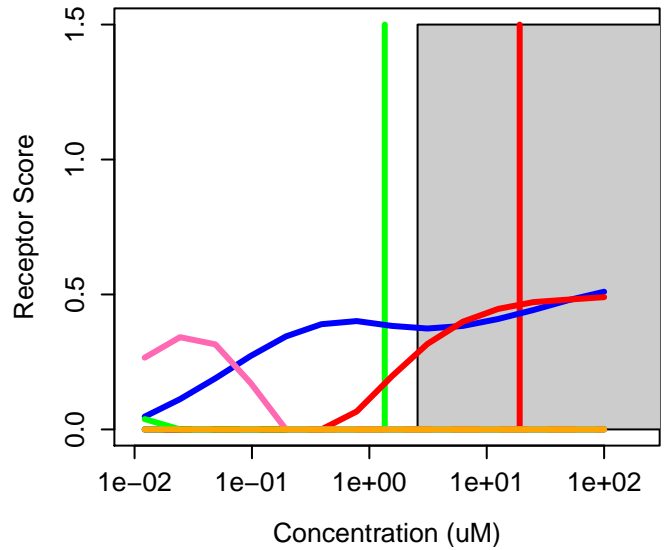

53-19-0 : o,p'-DDD

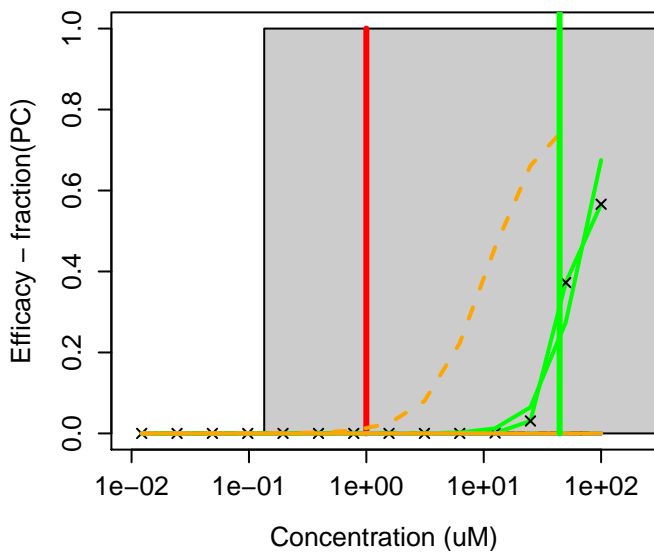

53-19-0 : o,p'-DDD  
Agonist: 0 Antagonist: 0.085

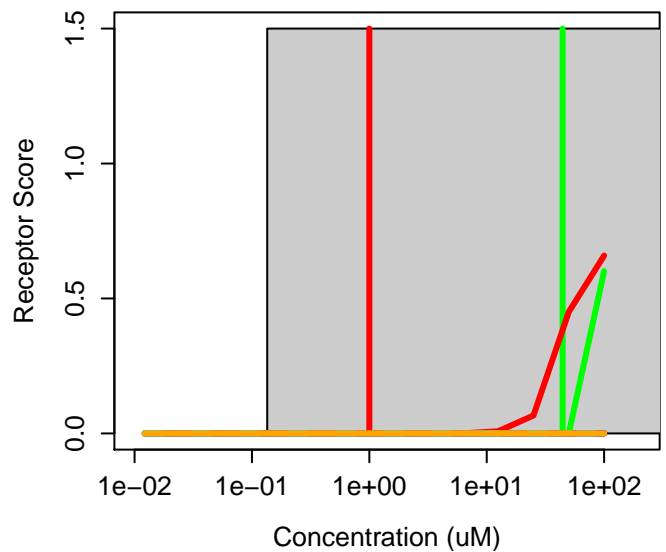

532-02-5 : Sodium 2-naphthalenesulfonate



532-02-5 : Sodium 2-naphthalenesulfonate  
Agonist: 0 Antagonist: 0



53219-21-9 : Dihydromyrcenol



53219-21-9 : Dihydromyrcenol  
Agonist: 0 Antagonist: 0



532-27-4 : 2-Chloroacetophenone

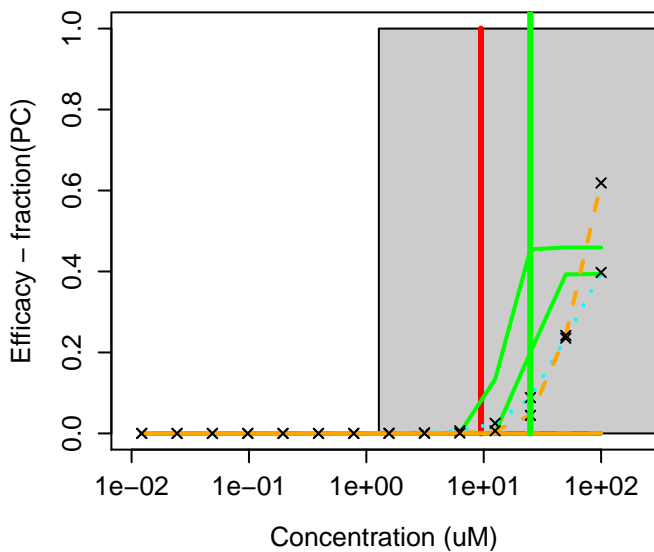

532-27-4 : 2-Chloroacetophenone  
Agonist: 0.0046 Antagonist: 0.041

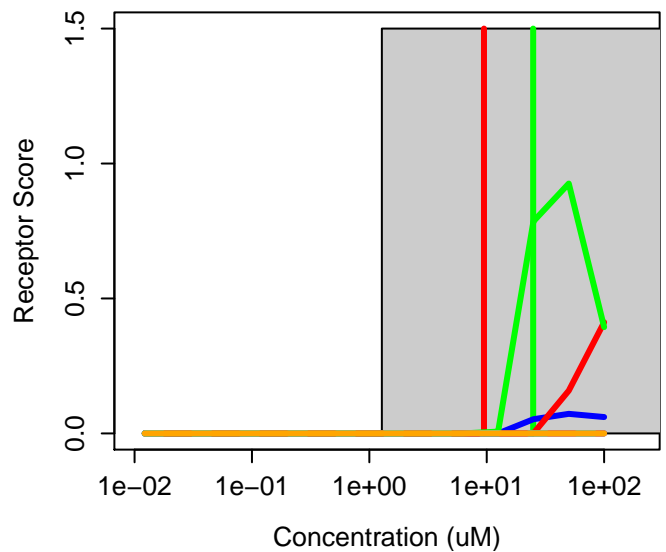



**532-32-1 : Sodium benzoate**



**532-32-1 : Sodium benzoate  
Agonist: 0 Antagonist: 0**



**5329-14-6 : Sulfamic acid**



**5329-14-6 : Sulfamic acid  
Agonist: 0 Antagonist: 0**



**533-23-3 : 2,4-D-ethyl ester**



**533-23-3 : 2,4-D-ethyl ester  
Agonist: 0 Antagonist: 0**



5333-42-6 : 2-Octyl-1-dodecanol



5333-42-6 : 2-Octyl-1-dodecanol  
Agonist: 0 Antagonist: 0



533-74-4 : Dazomet

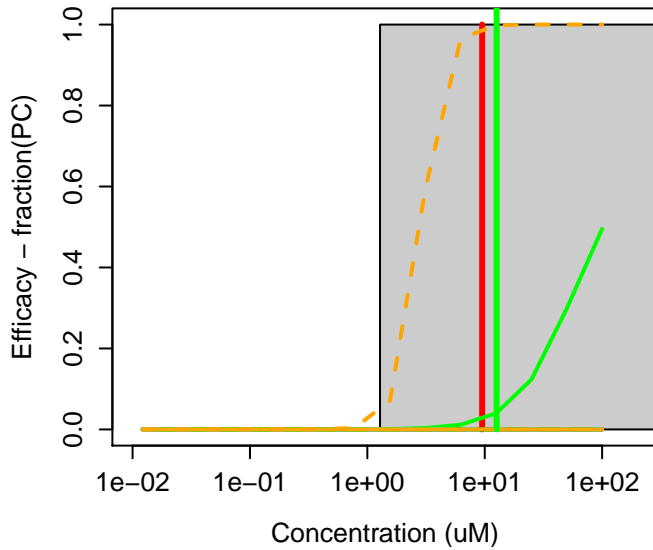

533-74-4 : Dazomet  
Agonist: 0 Antagonist: 0.048

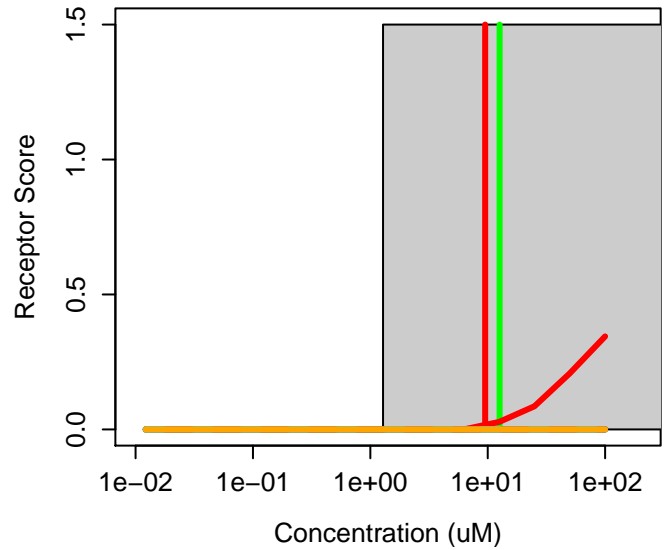

534-13-4 : N,N'-Dimethylthiourea



534-13-4 : N,N'-Dimethylthiourea  
Agonist: 0 Antagonist: 0



53-43-0 : Dehydroepiandrosterone

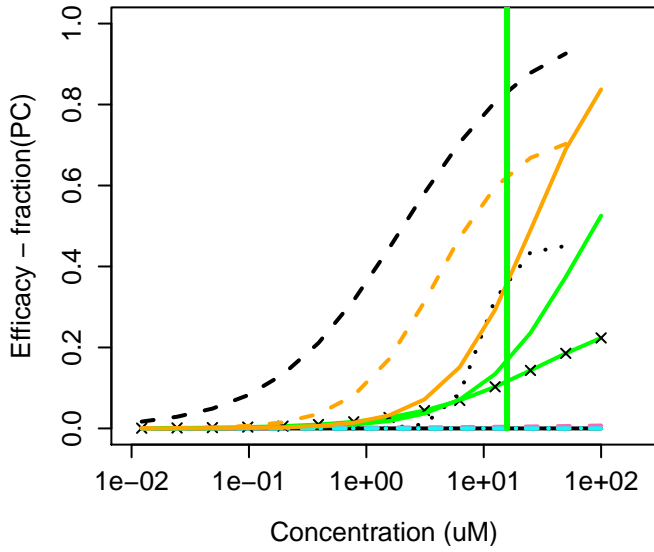

53-43-0 : Dehydroepiandrosterone  
Agonist: 0 Antagonist: 0.44

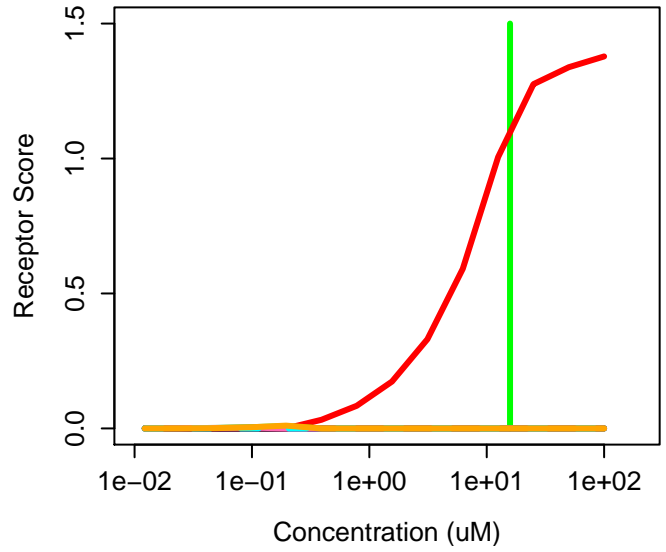

534-52-1 : 2-Methyl-4,6-dinitrophenol

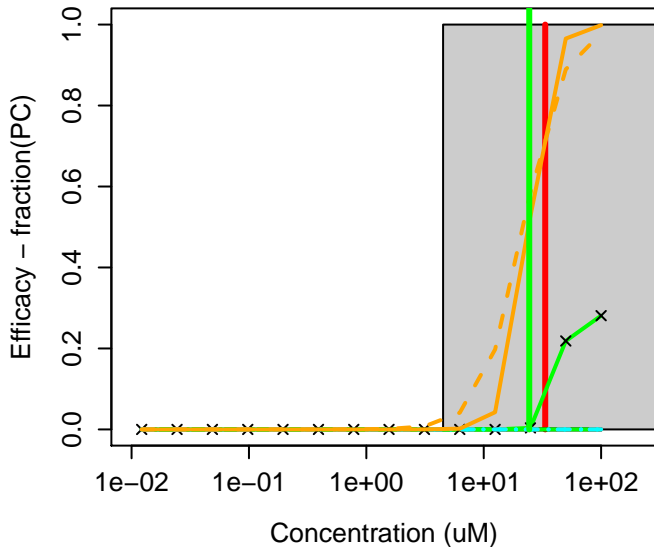

534-52-1 : 2-Methyl-4,6-dinitrophenol  
Agonist: 0 Antagonist: 0.03

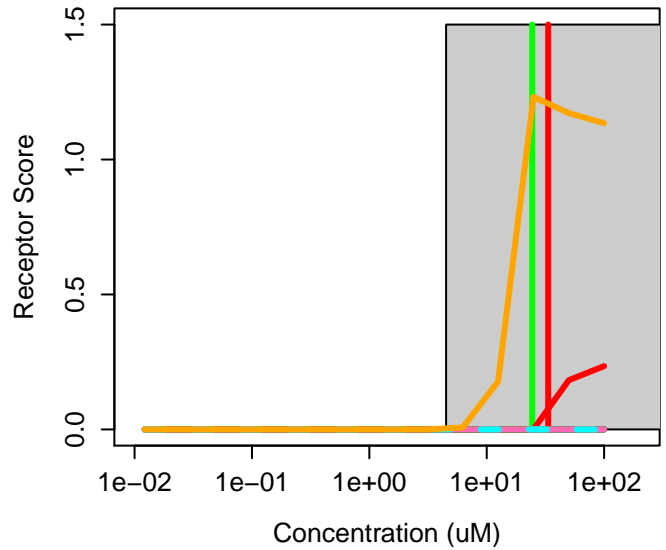

5349-51-9 : 4-(2-Methylbutan-2-yl)cyclohexanc

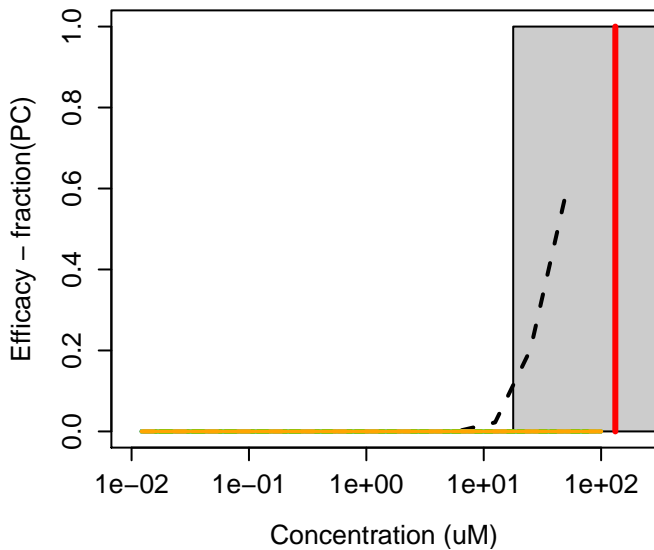

5349-51-9 : 4-(2-Methylbutan-2-yl)cyclohexanc  
Agonist: 0 Antagonist: 0

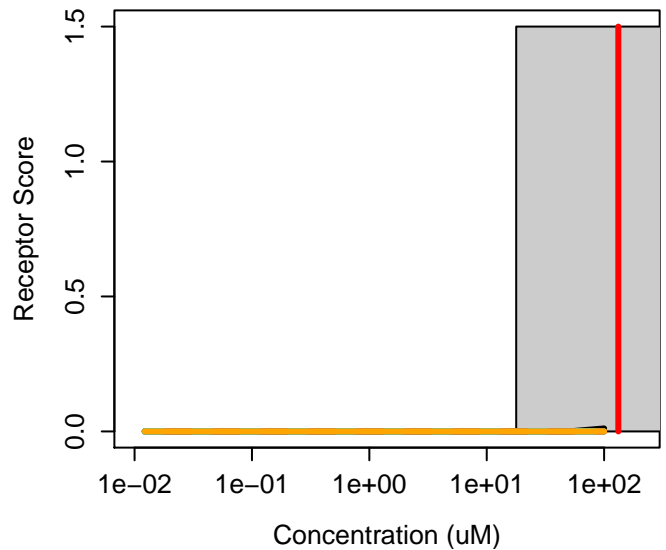

**53-70-3 : Dibenz(a,h)anthracene**

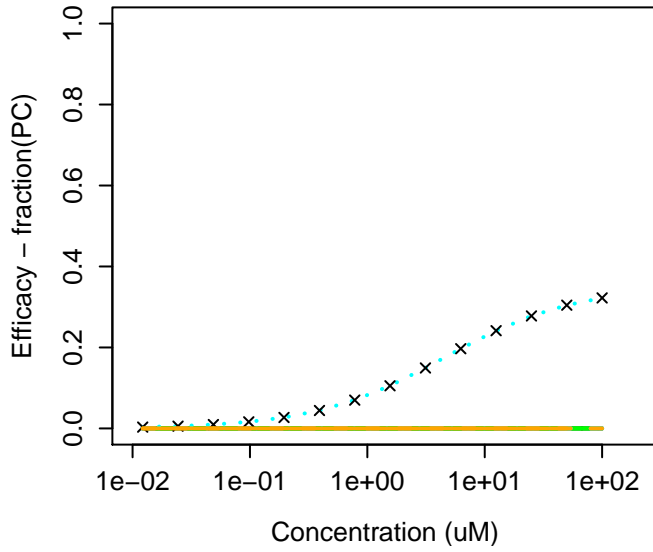

**53-70-3 : Dibenz(a,h)anthracene  
Agonist: 0 Antagonist: 0**



**53-86-1 : Indomethacin**

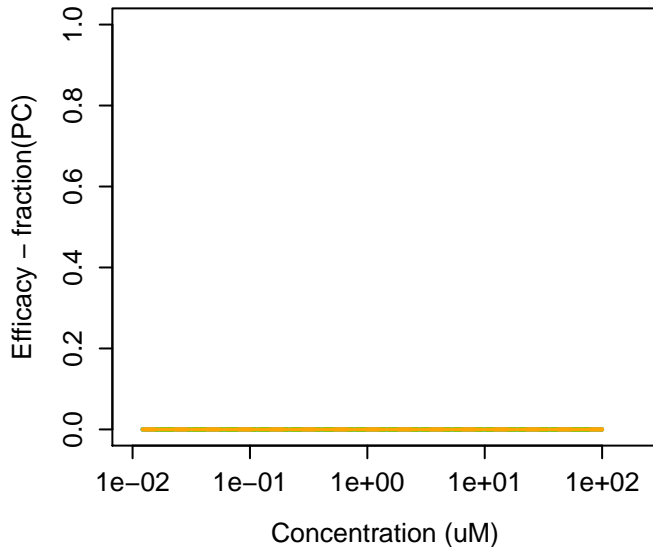

**53-86-1 : Indomethacin  
Agonist: 0 Antagonist: 0**



**53894-23-8 : Triisononyl trimellitate**

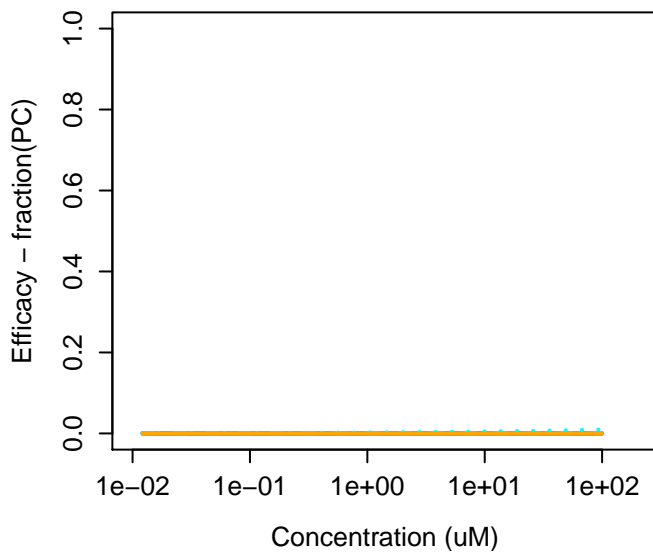

**53894-23-8 : Triisononyl trimellitate  
Agonist: 0 Antagonist: 0**

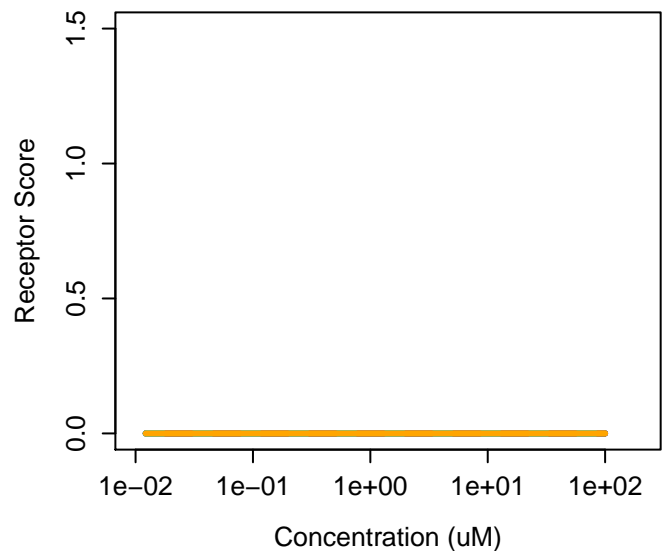

**5392-40-5 : 3,7-Dimethyl-2,6-octadienal**



**5392-40-5 : 3,7-Dimethyl-2,6-octadienal  
Agonist: 0 Antagonist: 0**



**53939-28-9 : (Z)-11-Hexadecenal**



**53939-28-9 : (Z)-11-Hexadecenal  
Agonist: 0 Antagonist: 0**



**5394-36-5 : 5-Ethyl-5-methylhydantoin**



**5394-36-5 : 5-Ethyl-5-methylhydantoin  
Agonist: 0 Antagonist: 0**



**540-18-1 : Pentyl butyrate**



**540-18-1 : Pentyl butyrate**  
**Agonist: 0 Antagonist: 0**



**5407-98-7 : Cyclobutyl phenyl ketone**



**5407-98-7 : Cyclobutyl phenyl ketone**  
**Agonist: 0 Antagonist: 0**



**540-88-5 : tert-Butyl acetate**

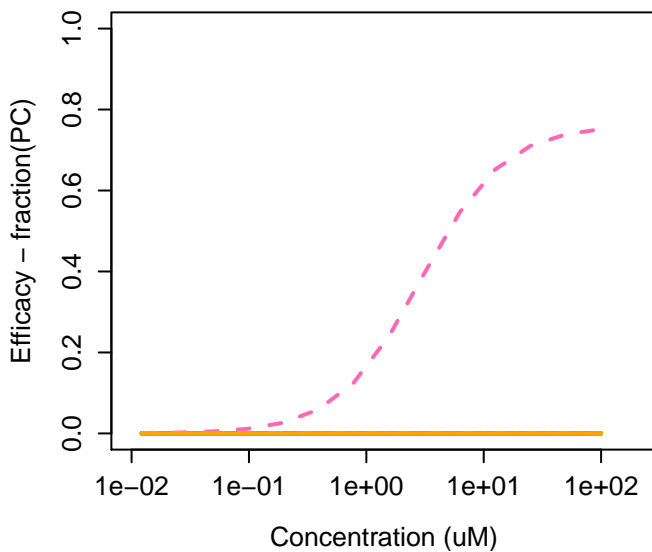

**540-88-5 : tert-Butyl acetate**  
**Agonist: 0 Antagonist: 0**

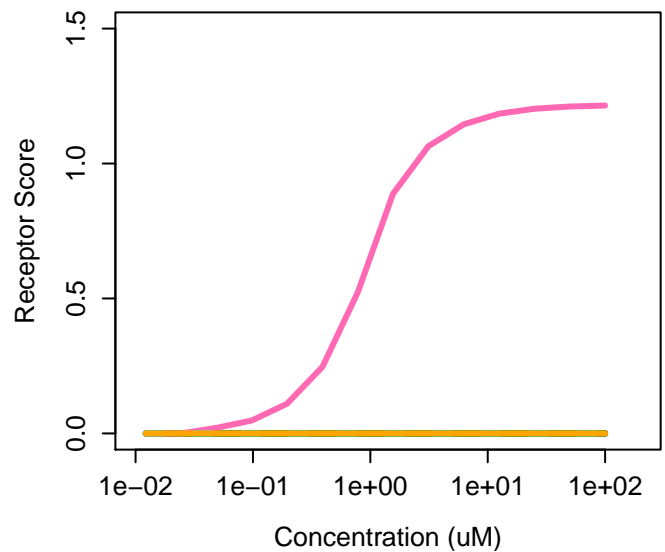

541-02-6 : Decamethylcyclopentasiloxane



541-02-6 : Decamethylcyclopentasiloxane  
Agonist: 0 Antagonist: 0



54-11-5 : Nicotine



54-11-5 : Nicotine  
Agonist: 0 Antagonist: 0



541-73-1 : 1,3-Dichlorobenzene

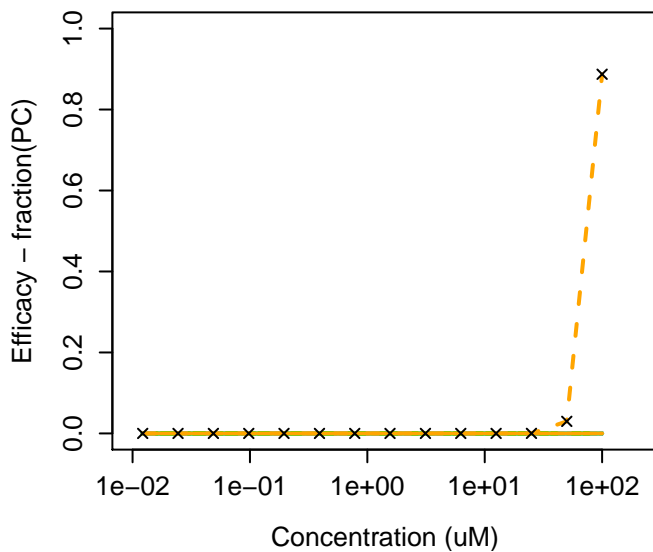

541-73-1 : 1,3-Dichlorobenzene  
Agonist: 0 Antagonist: 0



**542-92-7 : 1,3-Cyclopentadiene**



**542-92-7 : 1,3-Cyclopentadiene  
Agonist: 0 Antagonist: 0**



**5437-45-6 : Benzyl bromoacetate**

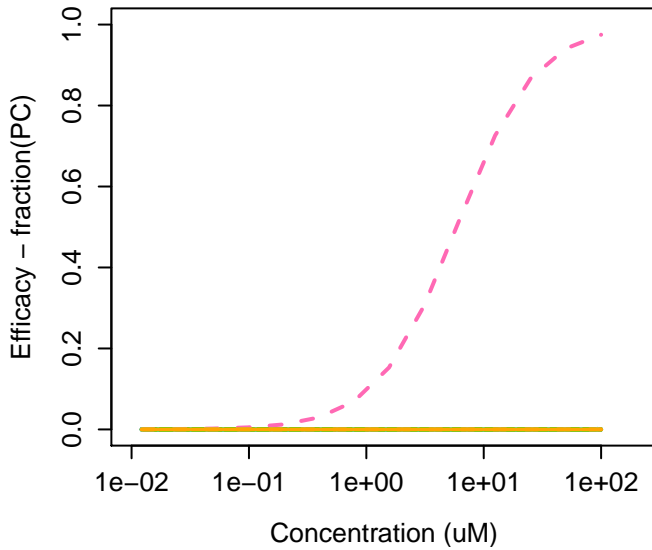

**5437-45-6 : Benzyl bromoacetate  
Agonist: 1.4e-05 Antagonist: 0**

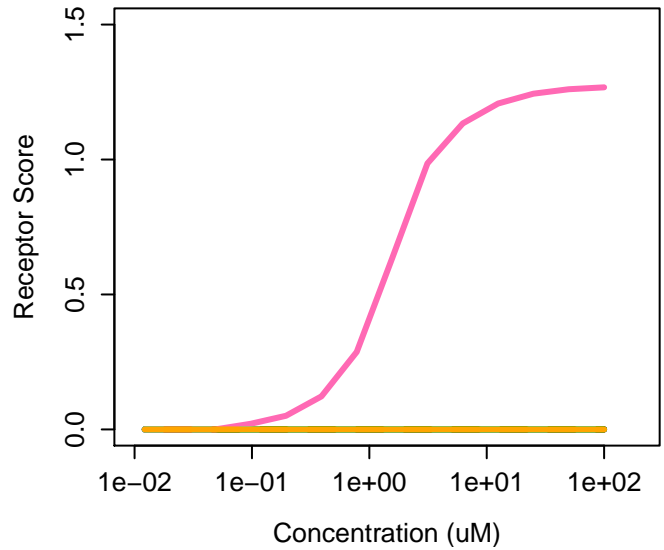

**544-63-8 : Tetradecanoic acid**



**544-63-8 : Tetradecanoic acid  
Agonist: 0 Antagonist: 0**





544-76-3 : Hexadecane



544-76-3 : Hexadecane  
Agonist: 0 Antagonist: 0



54593-83-8 : Chlorethoxyfos

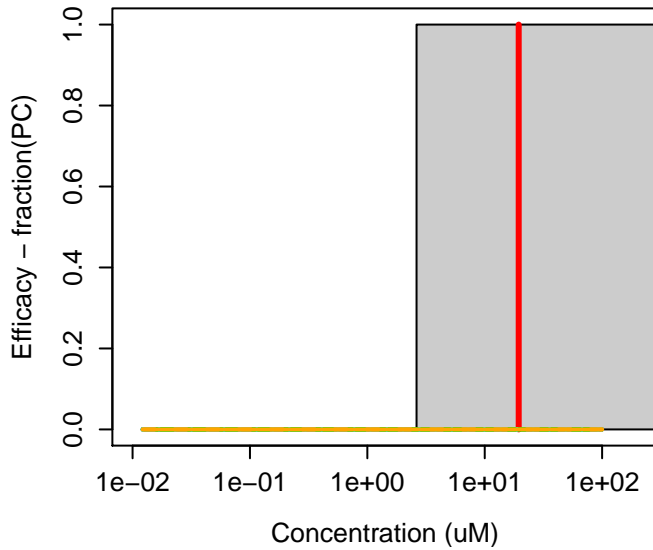

54593-83-8 : Chlorethoxyfos  
Agonist: 0 Antagonist: 0

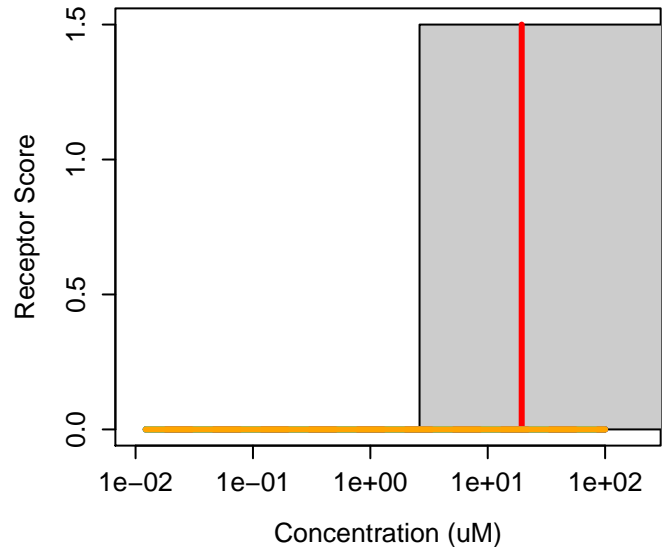

54-62-6 : 4-Aminofolic acid

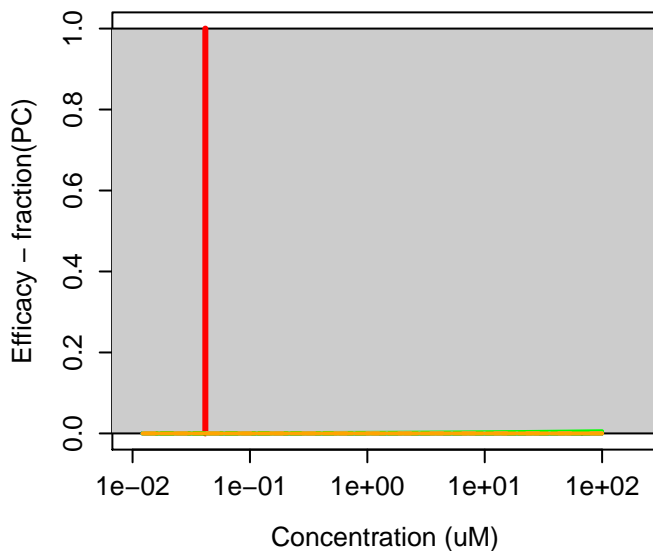

54-62-6 : 4-Aminofolic acid  
Agonist: 0 Antagonist: 0

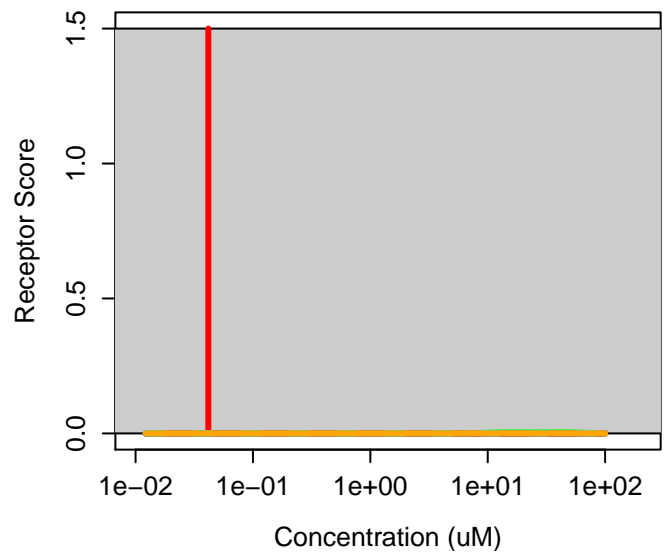

54-85-3 : Isoniazid

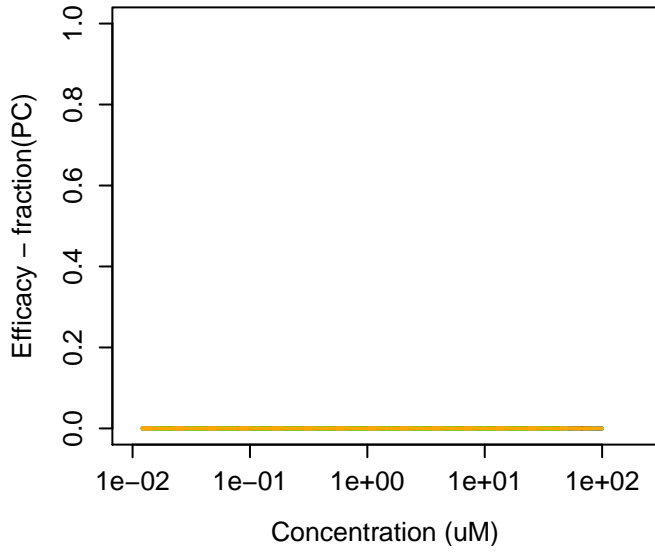

54-85-3 : Isoniazid  
Agonist: 0 Antagonist: 0



548-62-9 : Gentian Violet

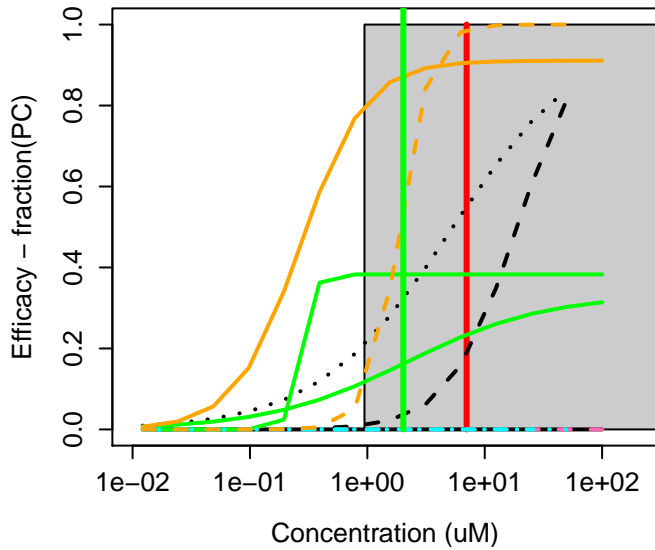

548-62-9 : Gentian Violet  
Agonist: 0 Antagonist: 0.66

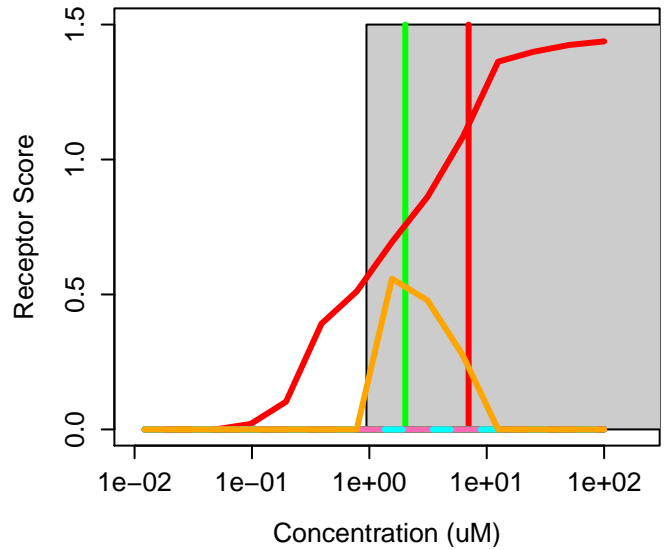

54965-24-1 : Tamoxifen citrate

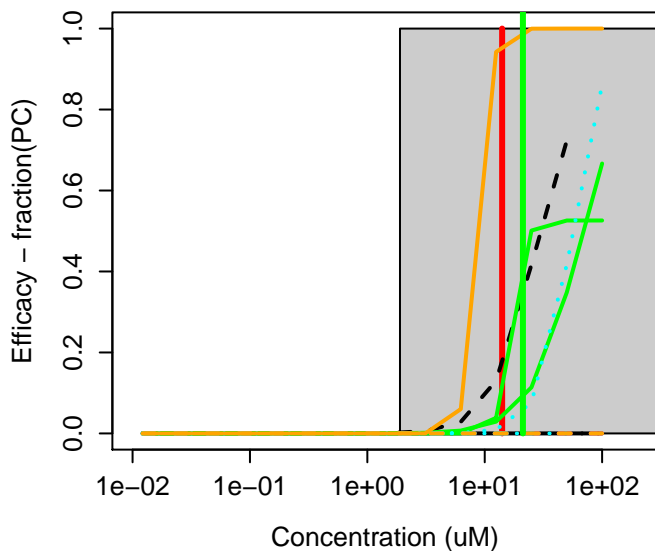

54965-24-1 : Tamoxifen citrate  
Agonist: 0.025 Antagonist: 0.071

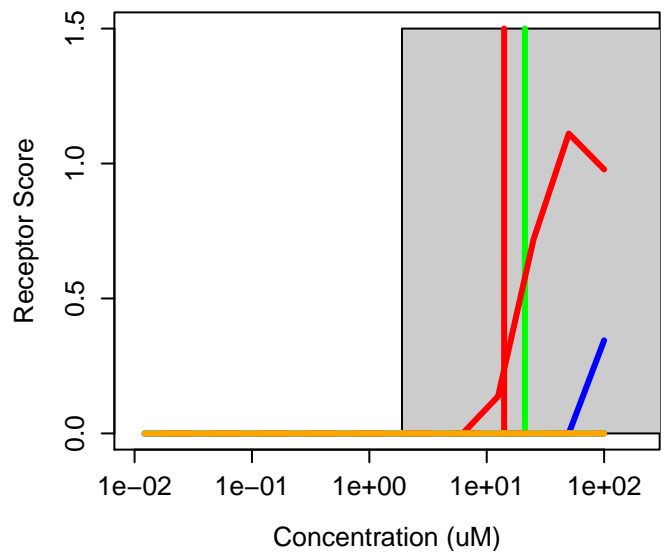

**550-44-7 : N-Methylphthalimide**



**550-44-7 : N-Methylphthalimide**  
**Agonist: 0 Antagonist: 0**



**55-18-5 : N-Nitrosodiethylamine**



**55-18-5 : N-Nitrosodiethylamine**  
**Agonist: 0 Antagonist: 0**



**55219-65-3 : Triadimenol**

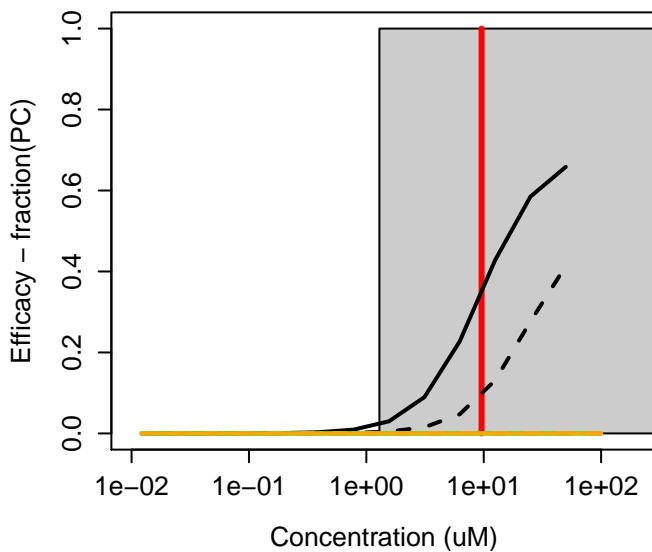

**55219-65-3 : Triadimenol**  
**Agonist: 0 Antagonist: 0**

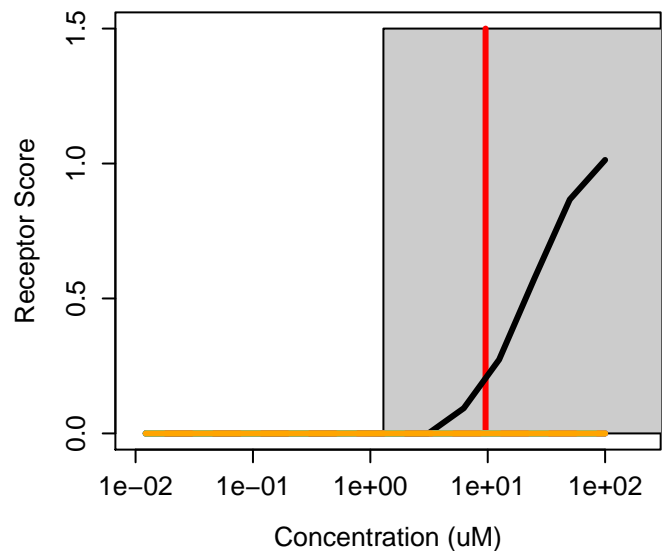

552-30-7 : Trimellitic anhydride



552-30-7 : Trimellitic anhydride  
Agonist: 0 Antagonist: 0



55283-68-6 : Ethalfluralin

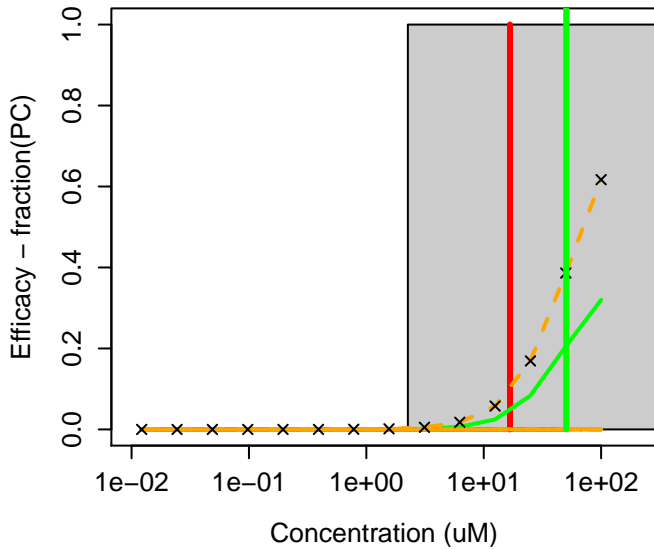

55283-68-6 : Ethalfluralin  
Agonist: 0 Antagonist: 0.026

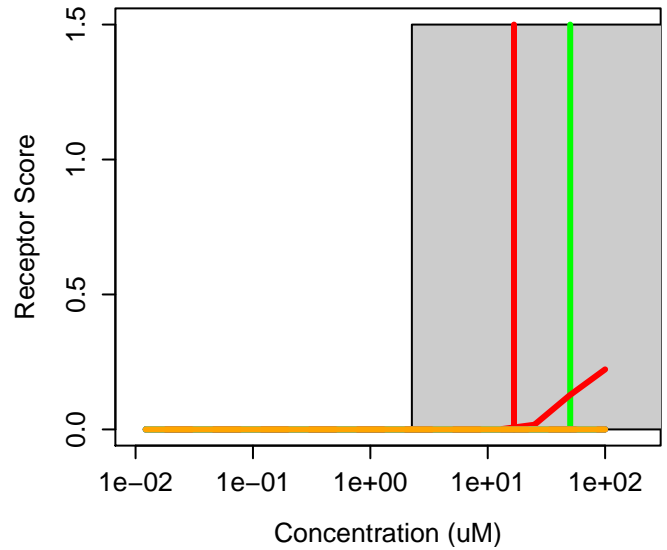

55285-14-8 : Carbosulfan

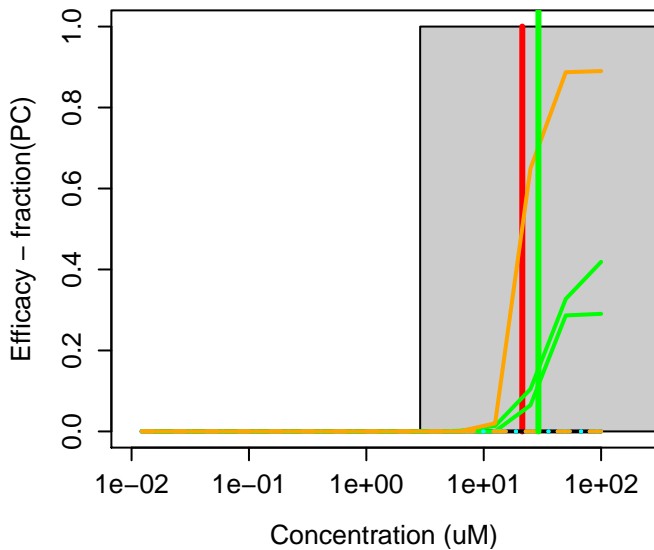

55285-14-8 : Carbosulfan  
Agonist: 0 Antagonist: 0.074

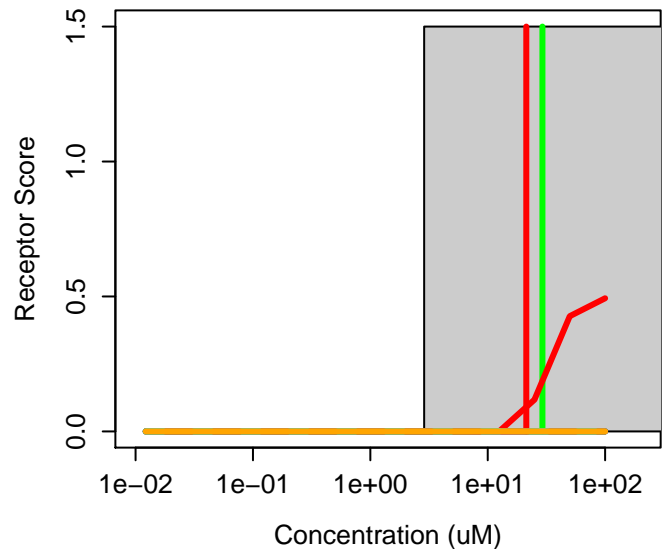

55290-64-7 : Dimethipin

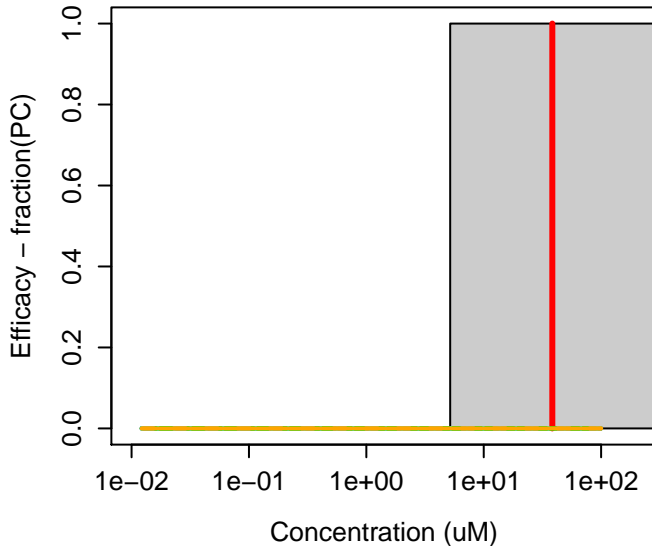

55290-64-7 : Dimethipin  
Agonist: 0 Antagonist: 0

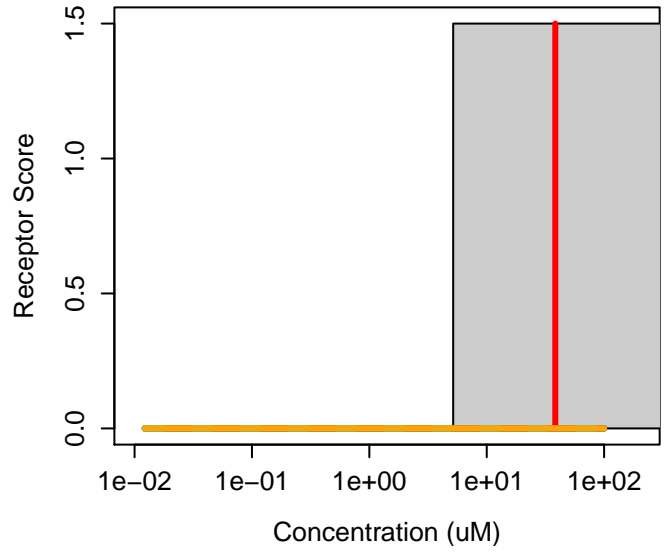

553-26-4 : 4,4'-Bipyridine



553-26-4 : 4,4'-Bipyridine  
Agonist: 0 Antagonist: 0



55335-06-3 : Triclopyr



55335-06-3 : Triclopyr  
Agonist: 0 Antagonist: 0



5536-61-8 : Sodium methacrylate



5536-61-8 : Sodium methacrylate  
Agonist: 0 Antagonist: 0



553-70-8 : Magnesium dibenzoate



553-70-8 : Magnesium dibenzoate  
Agonist: 0 Antagonist: 0



55-38-9 : Fenthion

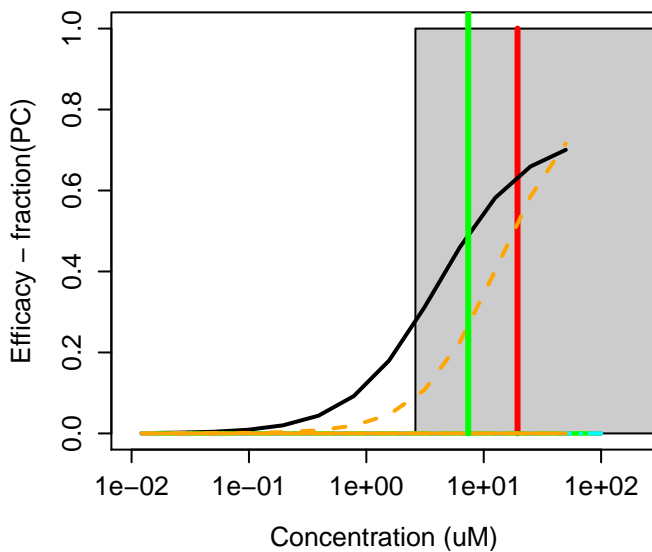

55-38-9 : Fenthion  
Agonist: 0 Antagonist: 0.13

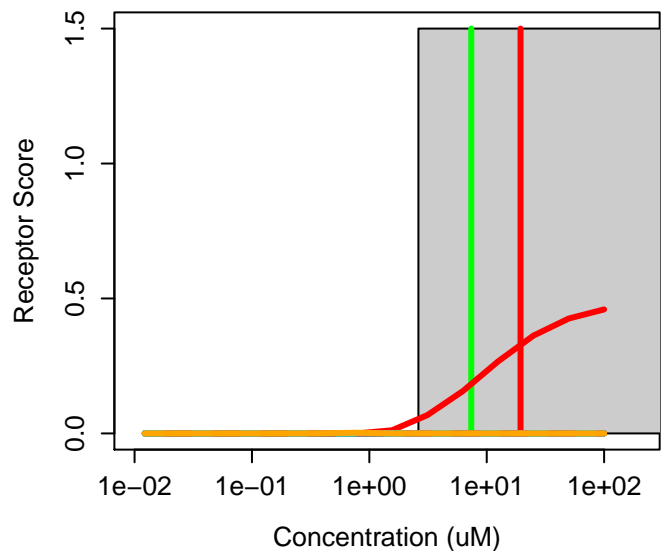

55406-53-6 : 3-Iodo-2-propynyl-N-butylcarbamate

55406-53-6 : 3-Iodo-2-propynyl-N-butylcarbamate  
Agonist: 0 Antagonist: 0.11

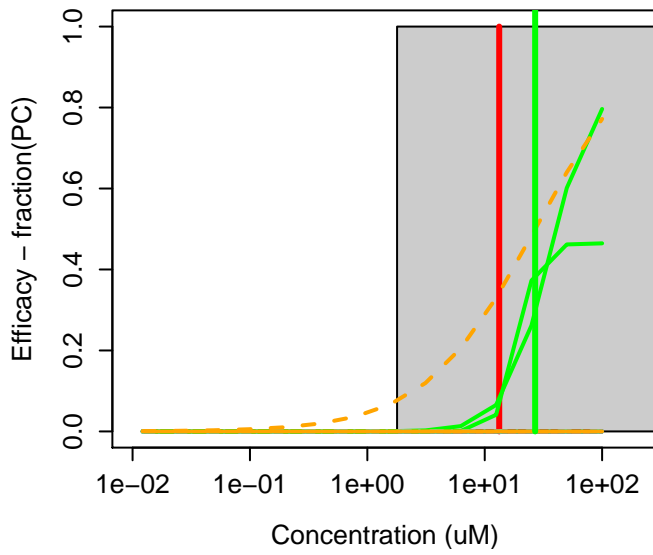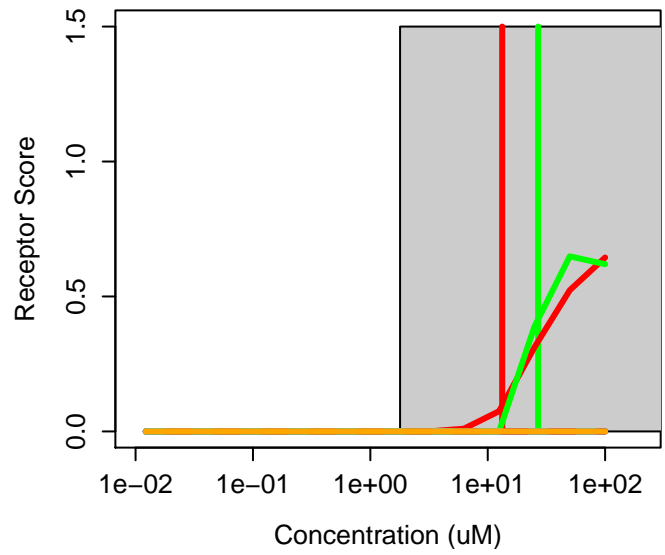

55512-33-9 : Pyridate

55512-33-9 : Pyridate  
Agonist: 0 Antagonist: 0



55589-62-3 : Acesulfame potassium

55589-62-3 : Acesulfame potassium  
Agonist: 0 Antagonist: 0

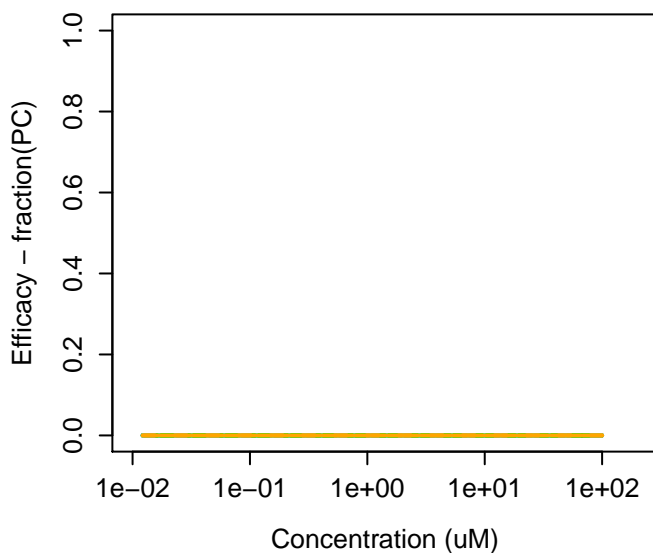

556-52-5 : Glycidol



556-52-5 : Glycidol  
Agonist: 0 Antagonist: 0



556-61-6 : Methyl isothiocyanate

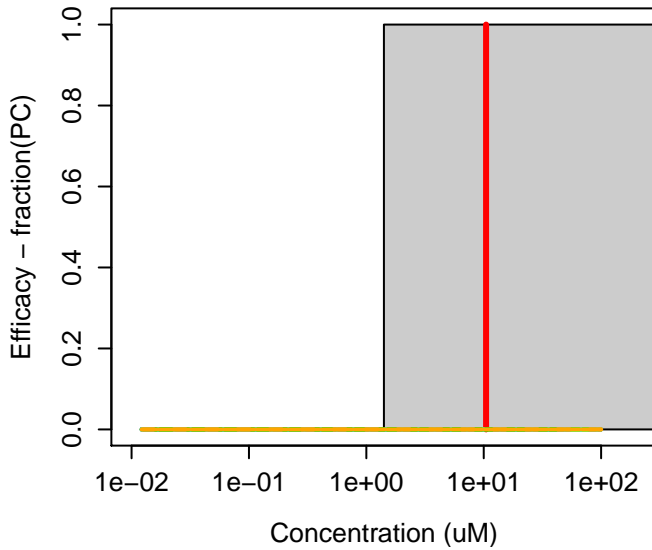

556-61-6 : Methyl isothiocyanate  
Agonist: 0 Antagonist: 0

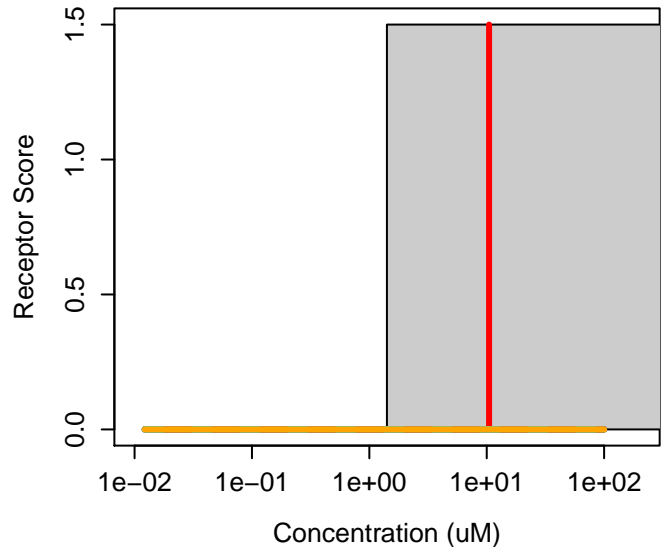

556-67-2 : Octamethylcyclotetrasiloxane



556-67-2 : Octamethylcyclotetrasiloxane  
Agonist: 0 Antagonist: 0





**55814-41-0 : Mepronil**

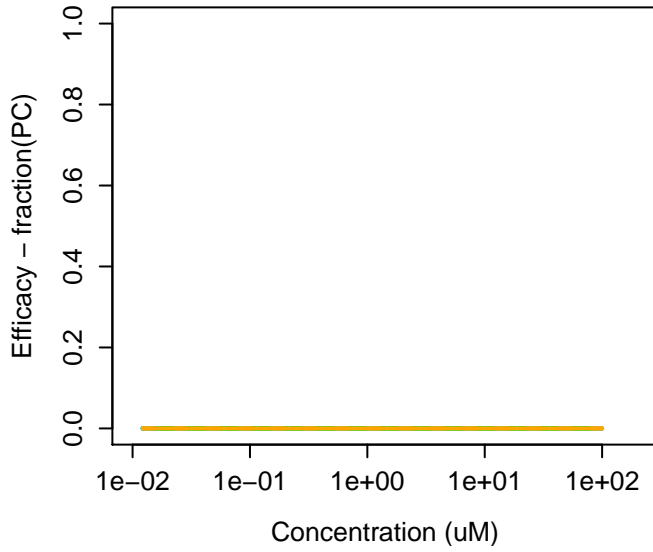

**55814-41-0 : Mepronil  
Agonist: 0 Antagonist: 0**



**55934-93-5 : Tripropylene glycol butyl ether**



**55934-93-5 : Tripropylene glycol butyl ether  
Agonist: 0 Antagonist: 0**



**55-98-1 : Busulfan**



**55-98-1 : Busulfan  
Agonist: 0 Antagonist: 0**



5598-13-0 : Chlorpyrifos-methyl

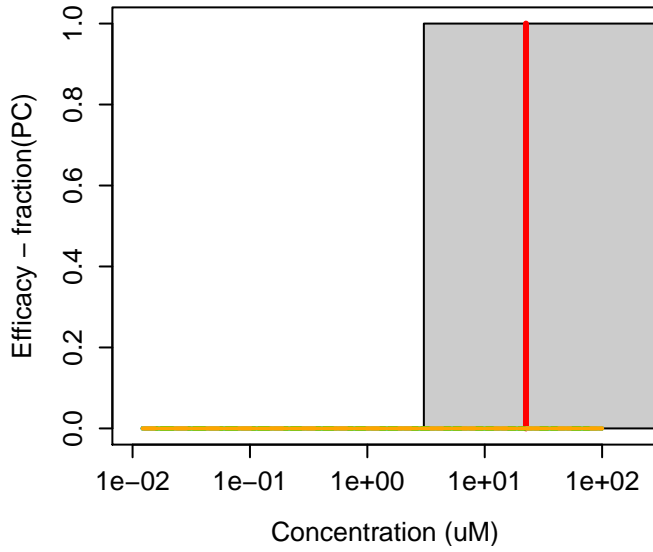

5598-13-0 : Chlorpyrifos-methyl  
Agonist: 0 Antagonist: 0

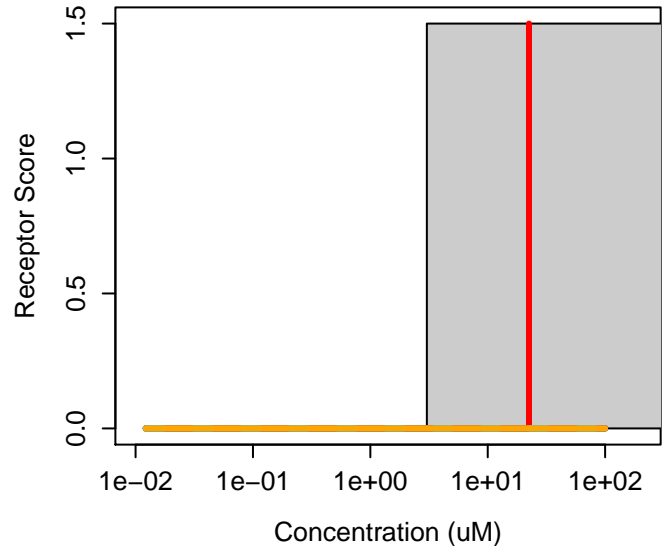

5598-15-2 : Chlorpyrifos oxon

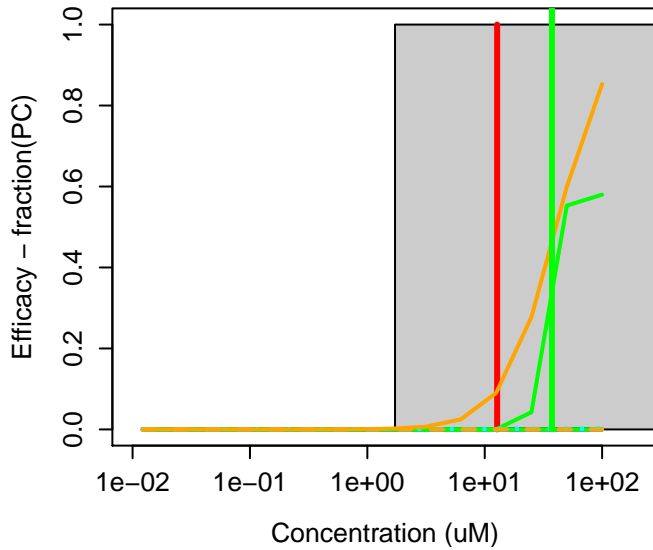

5598-15-2 : Chlorpyrifos oxon  
Agonist: 0 Antagonist: 0.054

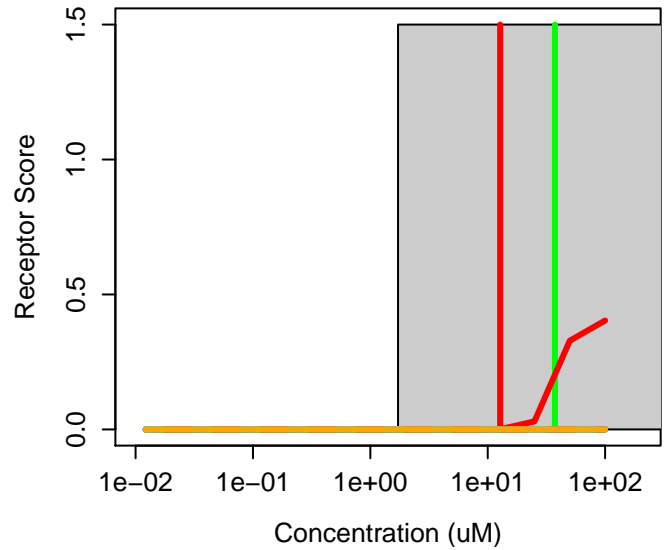

56-04-2 : 6-Methyl-2-thiouracil



56-04-2 : 6-Methyl-2-thiouracil  
Agonist: 0 Antagonist: 0



563-12-2 : Ethion

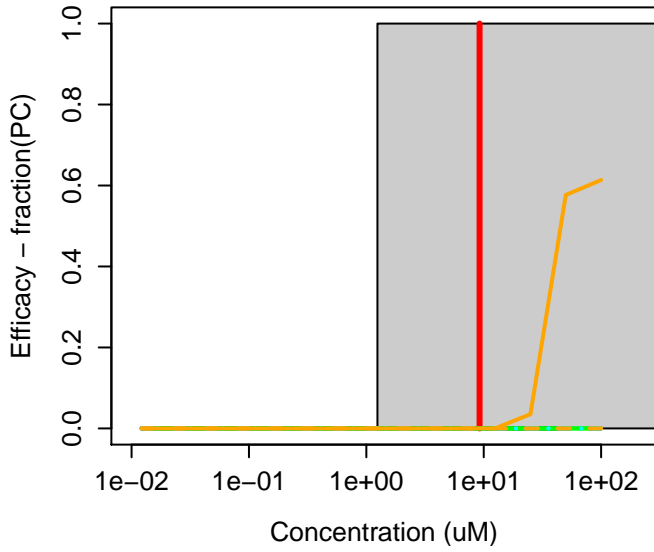

563-12-2 : Ethion  
Agonist: 0 Antagonist: 0.00026

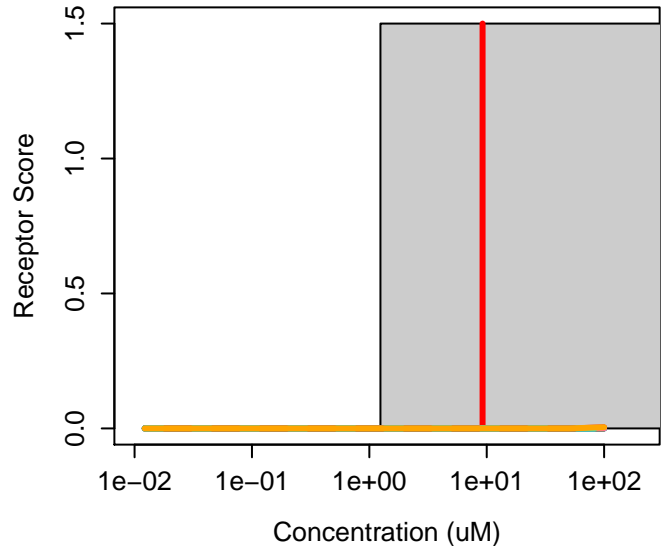

375-79-2 : N,N-Dibutyl-N-methylbutan-1-aminium (375-79-2 : N,N-Dibutyl-N-methylbutan-1-aminium (Agonist: 0 Antagonist: 0



56-38-2 : Parathion

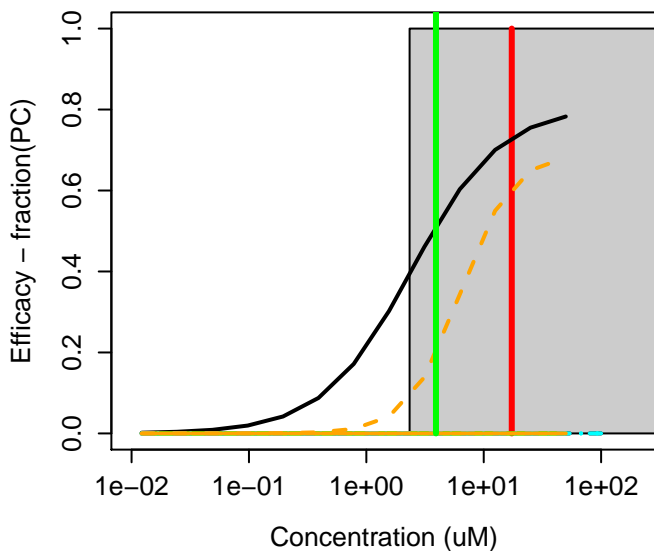

56-38-2 : Parathion  
Agonist: 0 Antagonist: 0.15

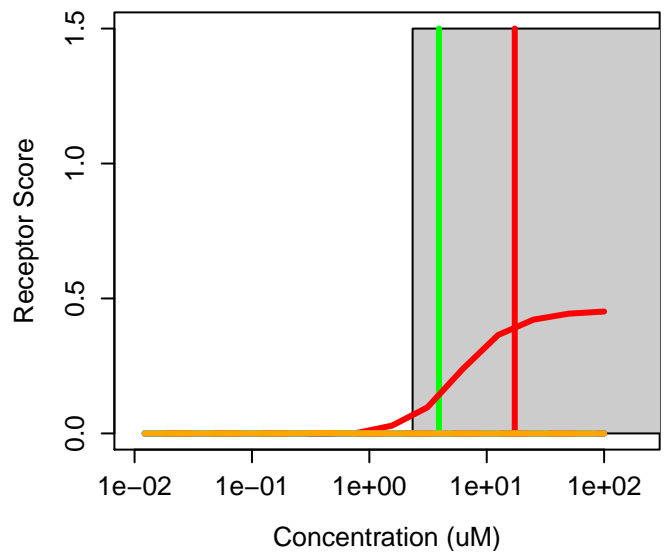

**56-53-1 : Diethylstilbestrol**

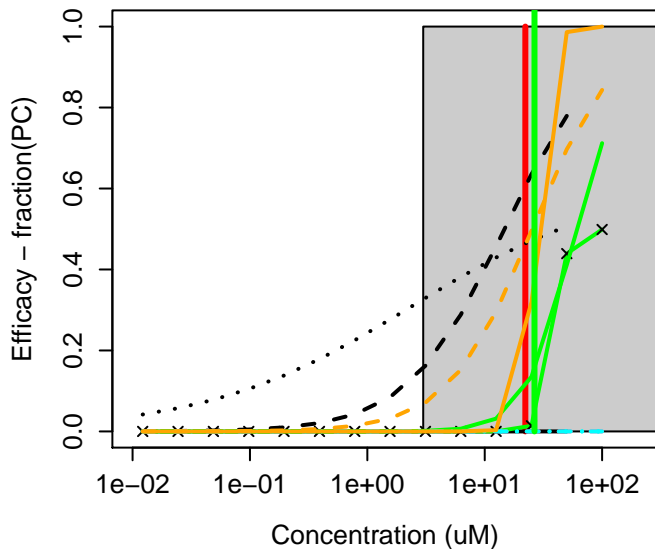

**56-53-1 : Diethylstilbestrol**  
Agonist: 0 Antagonist: 0.32

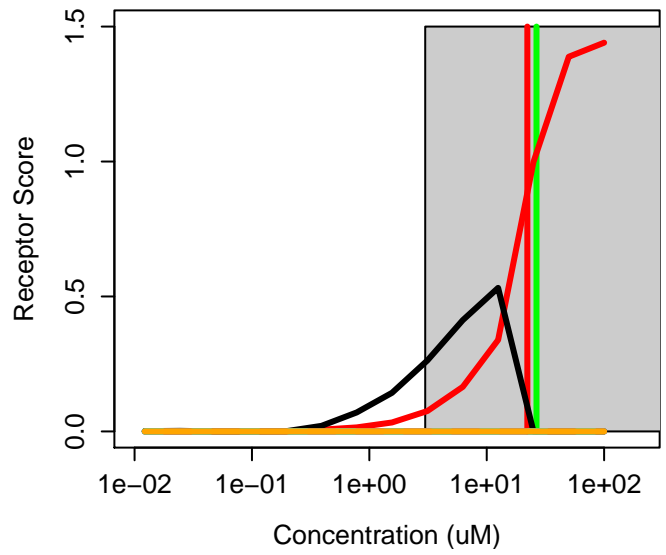

**56-55-3 : Benz(a)anthracene**

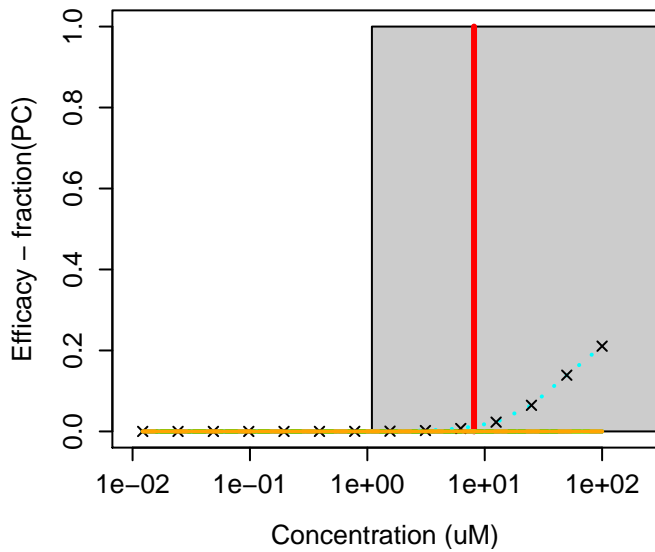

**56-55-3 : Benz(a)anthracene**  
Agonist: 0 Antagonist: 0

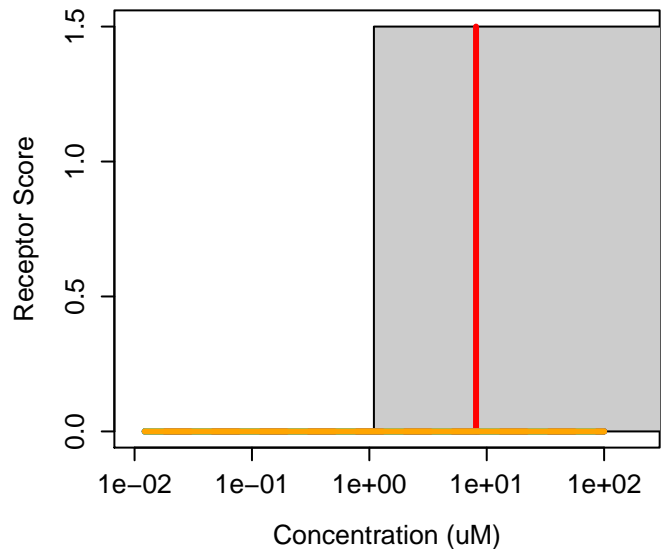

**56-72-4 : Coumaphos**

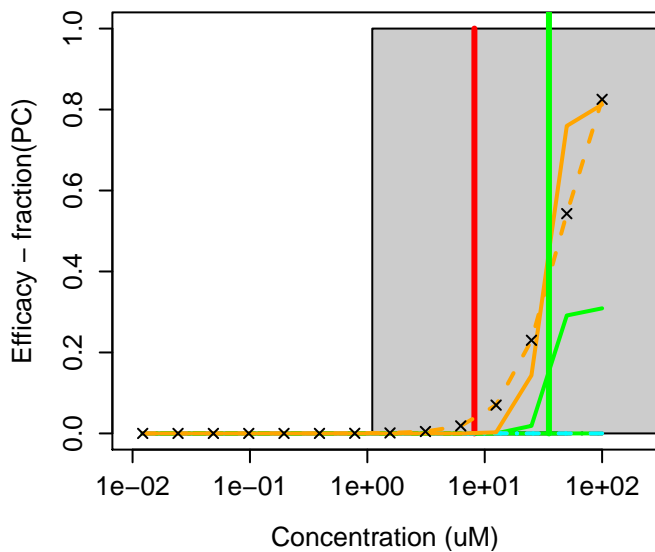

**56-72-4 : Coumaphos**  
Agonist: 0 Antagonist: 0.037

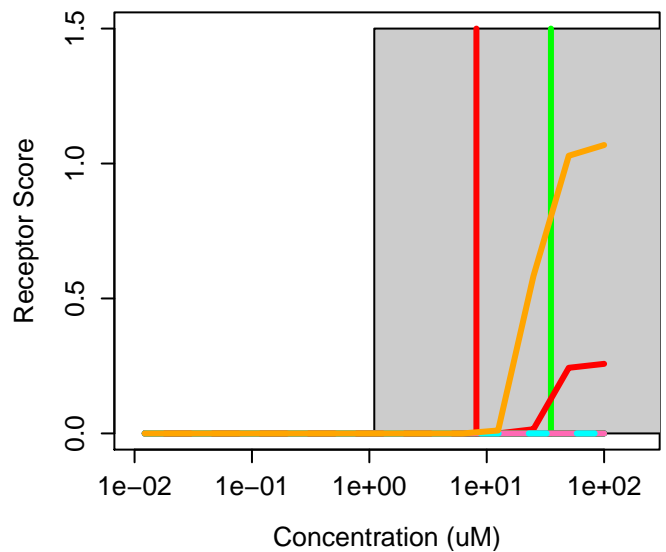

56-81-5 : Glycerol

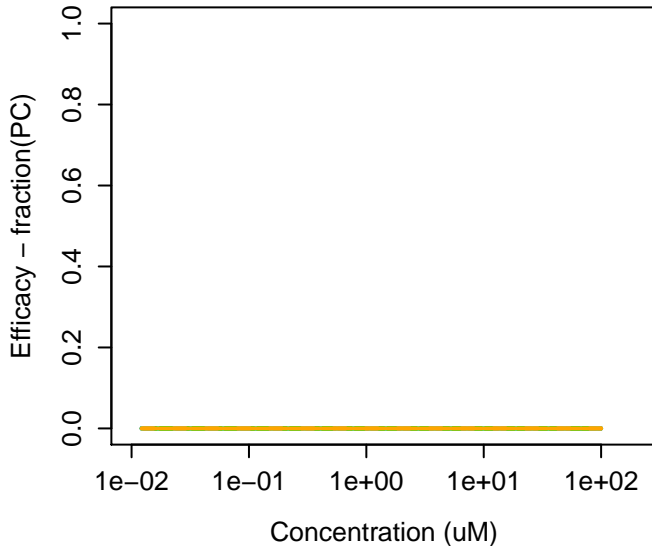

56-81-5 : Glycerol  
Agonist: 0 Antagonist: 0



56-95-1 : Chlorhexidine diacetate

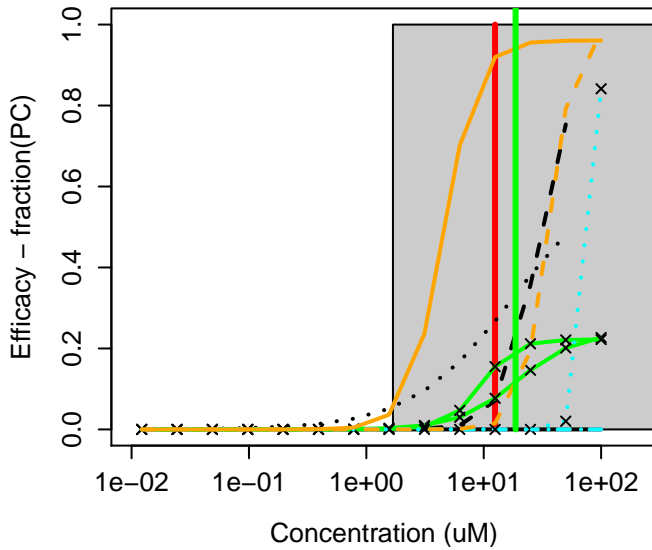

56-95-1 : Chlorhexidine diacetate  
Agonist: 0 Antagonist: 0.31

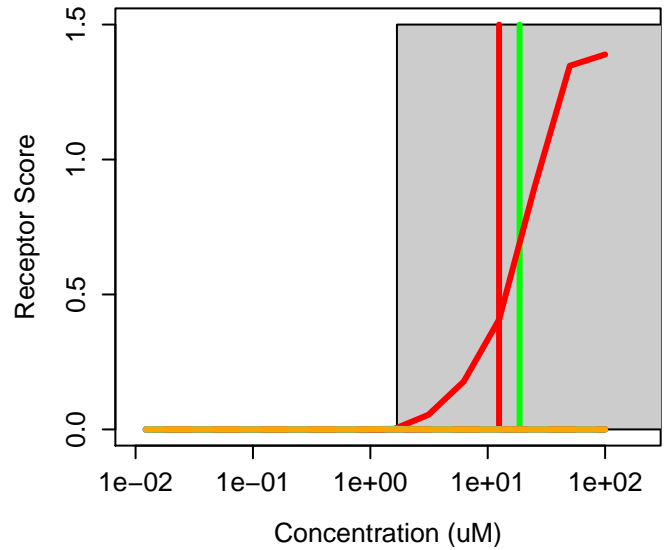

5700-49-2 : 1,2-Ethanediamine dihydriodide



5700-49-2 : 1,2-Ethanediamine dihydriodide  
Agonist: 0 Antagonist: 0



57-06-7 : Allyl isothiocyanate



57-06-7 : Allyl isothiocyanate  
Agonist: 0 Antagonist: 0



57-09-0 : Hexadecyltrimethylammonium bromid

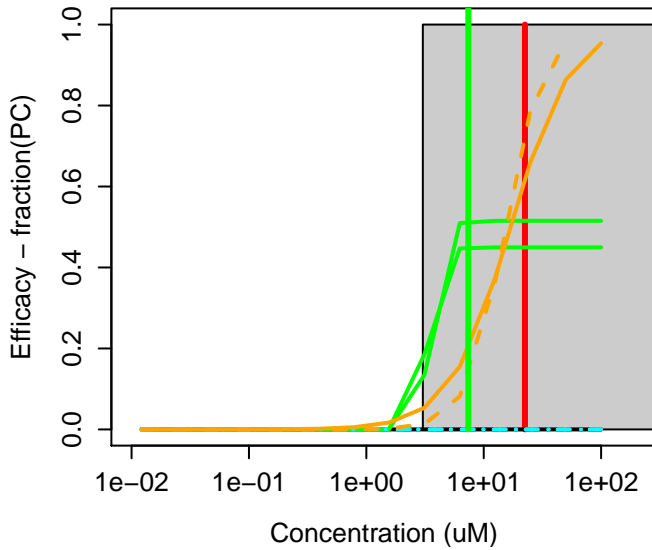

57-09-0 : Hexadecyltrimethylammonium bromid  
Agonist: 0 Antagonist: 0.23

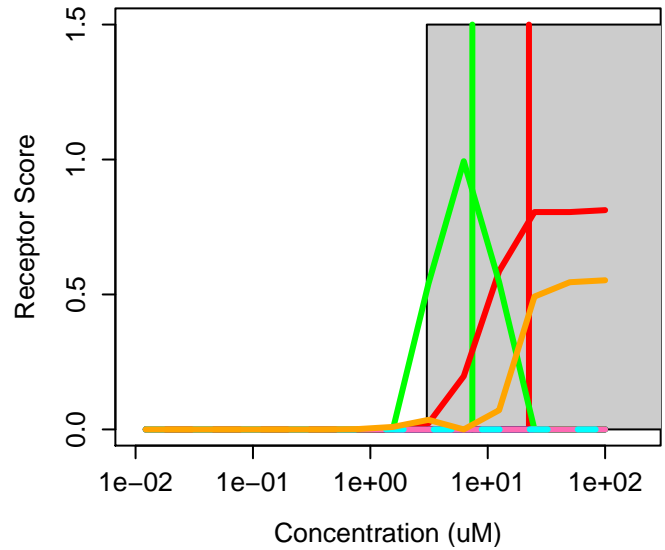

57-10-3 : Hexadecanoic acid

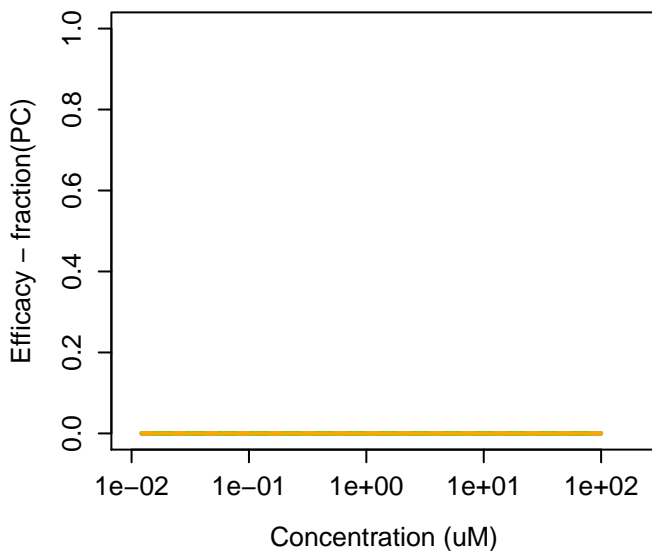

57-10-3 : Hexadecanoic acid  
Agonist: 0 Antagonist: 0



57-11-4 : Octadecanoic acid

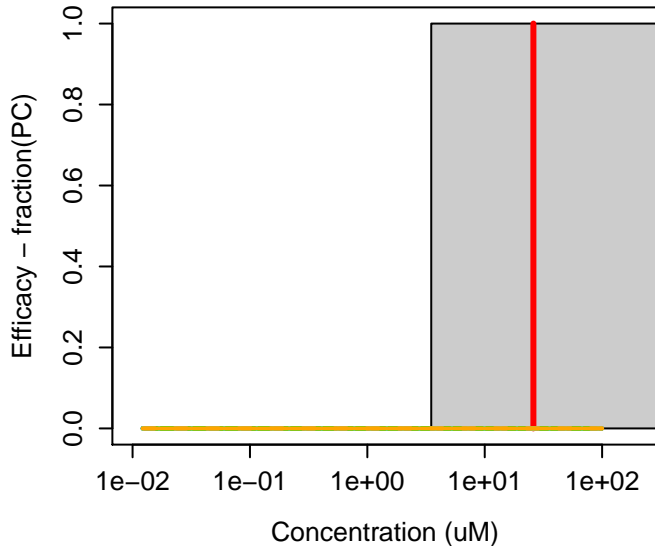

57-11-4 : Octadecanoic acid  
Agonist: 0 Antagonist: 0

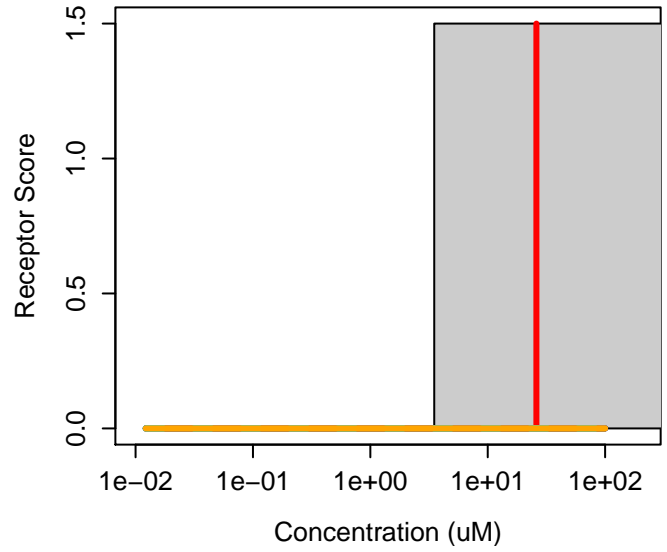

57-13-6 : Urea

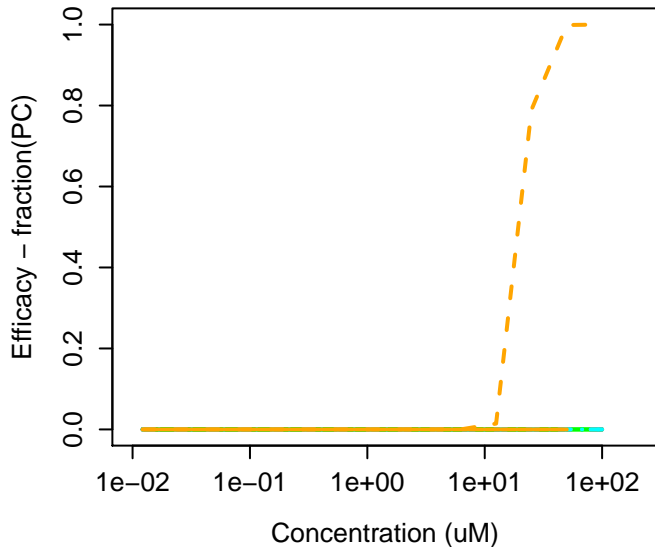

57-13-6 : Urea  
Agonist: 0 Antagonist: 0



57-14-7 : 1,1-Dimethylhydrazine



57-14-7 : 1,1-Dimethylhydrazine  
Agonist: 0 Antagonist: 0



**571-58-4 : 1,4-Dimethylnaphthalene**



**571-58-4 : 1,4-Dimethylnaphthalene  
Agonist: 0 Antagonist: 0**



**57-30-7 : Phenobarbital sodium**

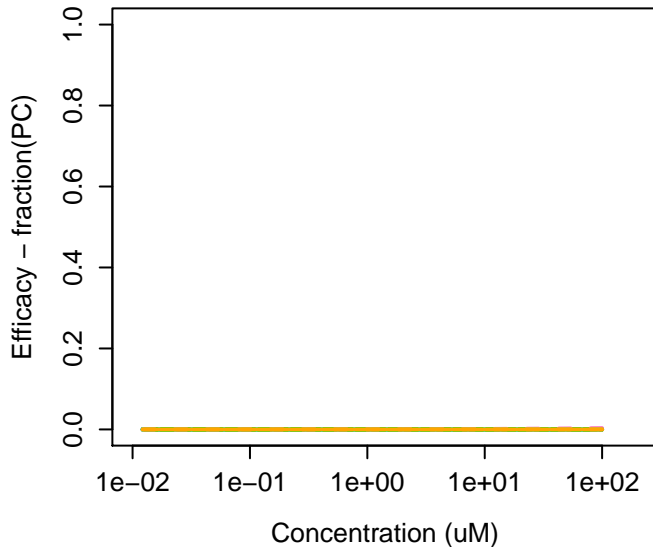

**57-30-7 : Phenobarbital sodium  
Agonist: 0 Antagonist: 0**

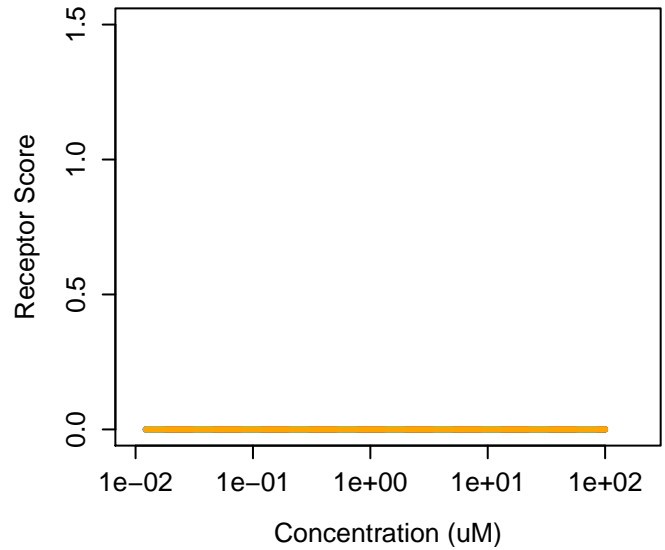

**57-41-0 : 5,5-Diphenylhydantoin**



**57-41-0 : 5,5-Diphenylhydantoin  
Agonist: 0 Antagonist: 0**





**57-50-1 : Sucrose**



**57-50-1 : Sucrose  
Agonist: 0 Antagonist: 0**



**57-55-6 : 1,2-Propylene glycol**



**57-55-6 : 1,2-Propylene glycol  
Agonist: 0 Antagonist: 0**



**576-26-1 : 2,6-Dimethylphenol**



**576-26-1 : 2,6-Dimethylphenol  
Agonist: 0 Antagonist: 0**



57-63-6 : 17alpha-Ethinylestradiol

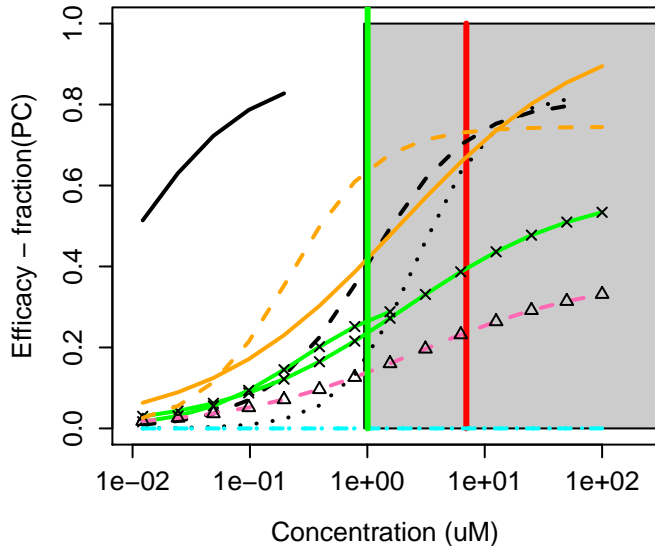

57-63-6 : 17alpha-Ethinylestradiol  
Agonist: 0 Antagonist: 1

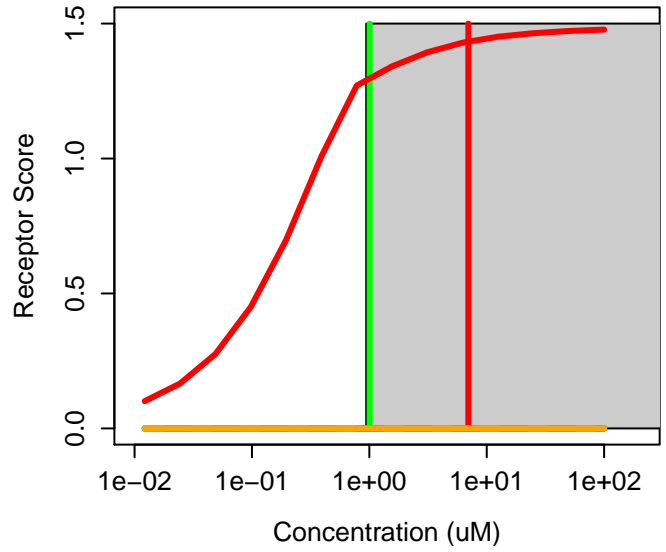

577-11-7 : Docusate sodium

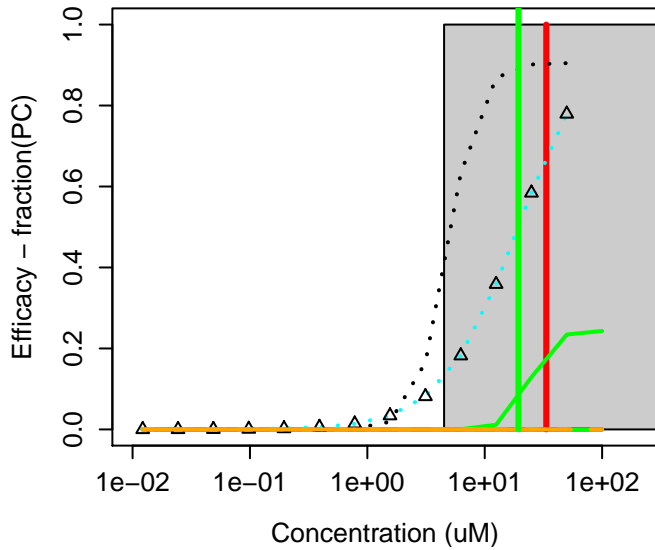

577-11-7 : Docusate sodium  
Agonist: 0.12 Antagonist: 0

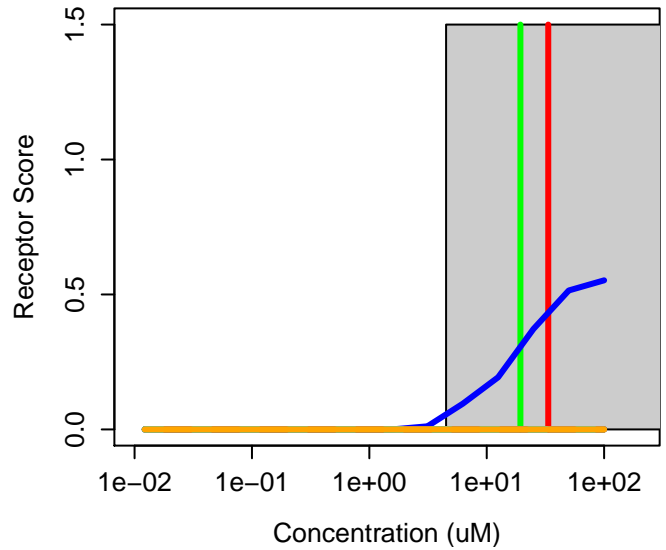

57-74-9 : Chlordane

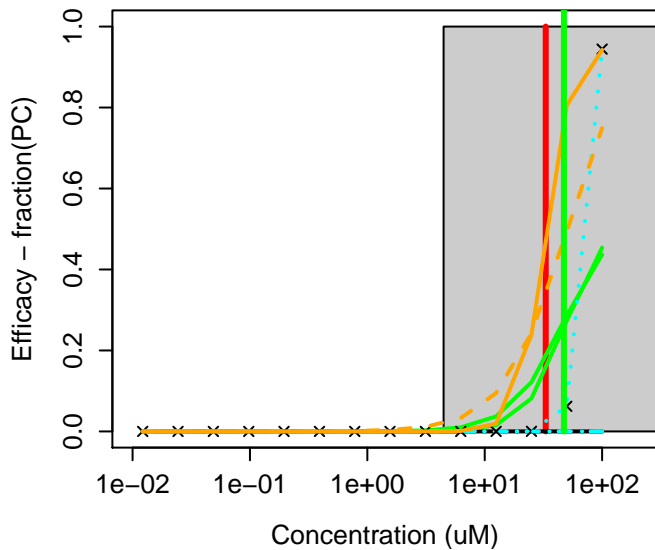

57-74-9 : Chlordane  
Agonist: 0 Antagonist: 0.094

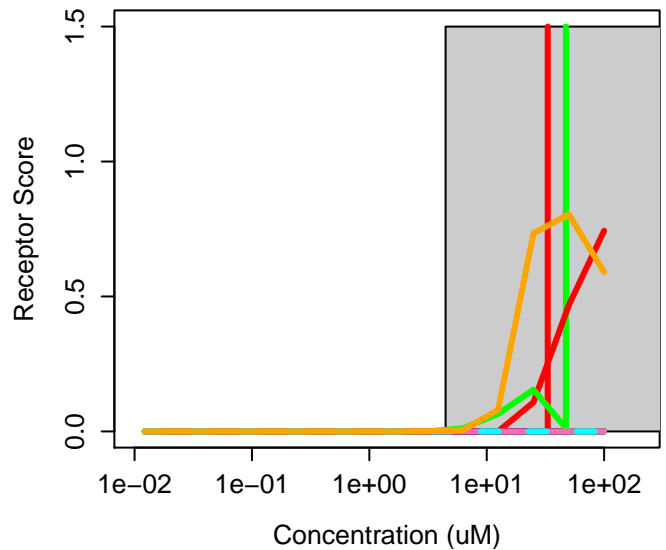

57754-85-5 : Clopyralid-olamine



57754-85-5 : Clopyralid-olamine  
Agonist: 0 Antagonist: 0



57-83-0 : Progesterone

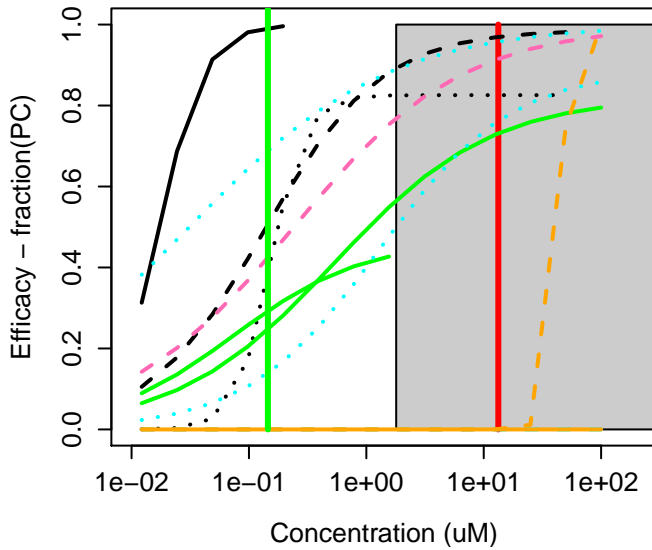

57-83-0 : Progesterone  
Agonist: 1.3 Antagonist: 0

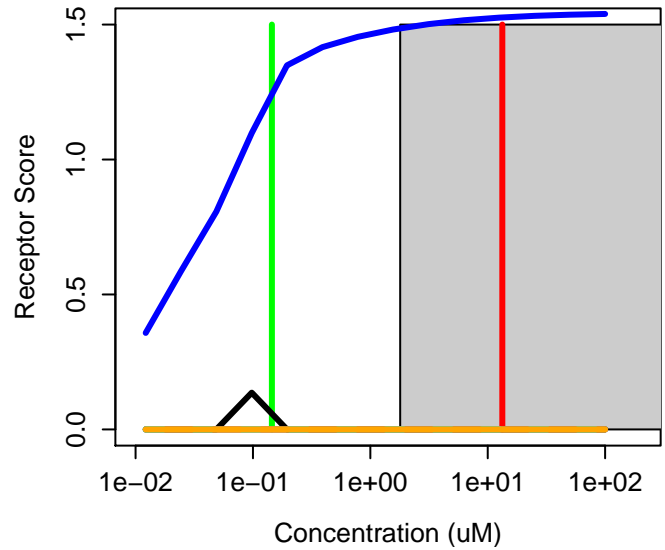

57837-19-1 : Metalaxyl

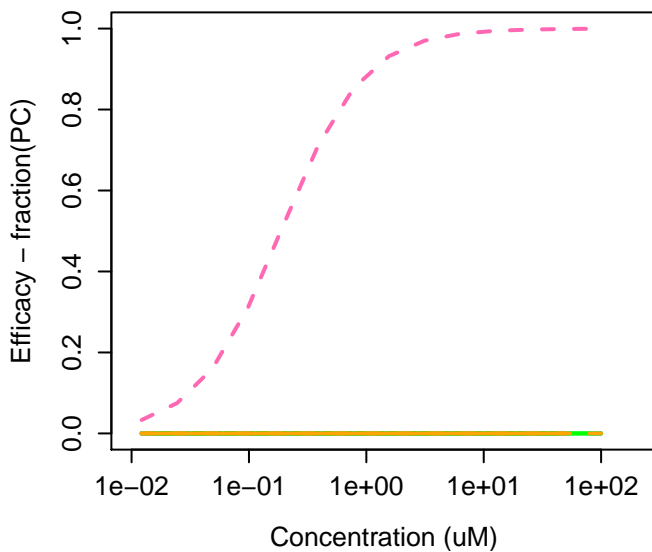

57837-19-1 : Metalaxyl  
Agonist: 0 Antagonist: 0

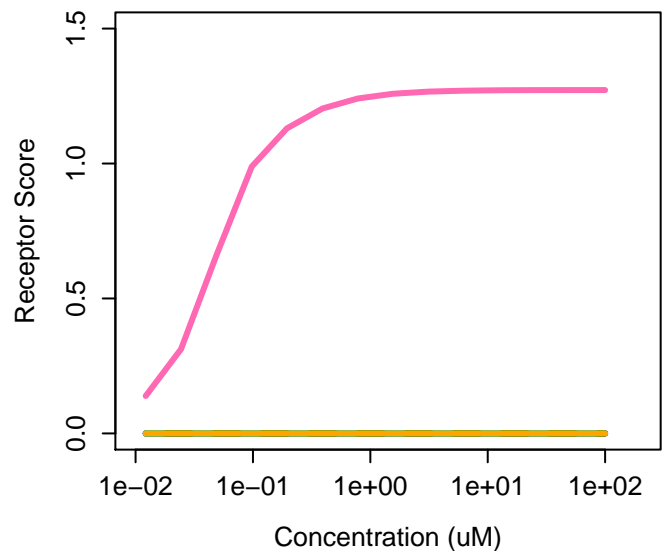

57-85-2 : Testosterone propionate

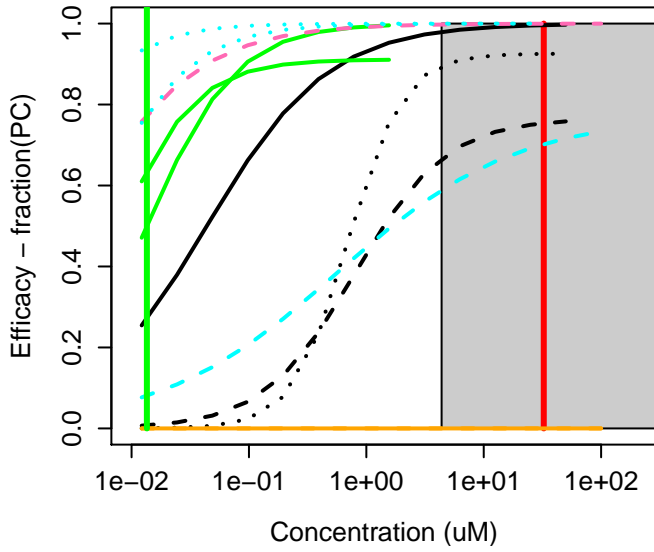

57-85-2 : Testosterone propionate  
Agonist: 1.5 Antagonist: 0

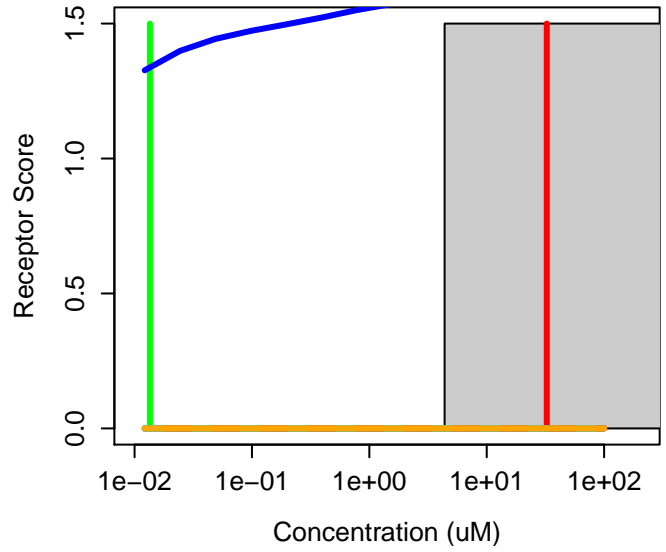

57-91-0 : 17alpha-Estradiol

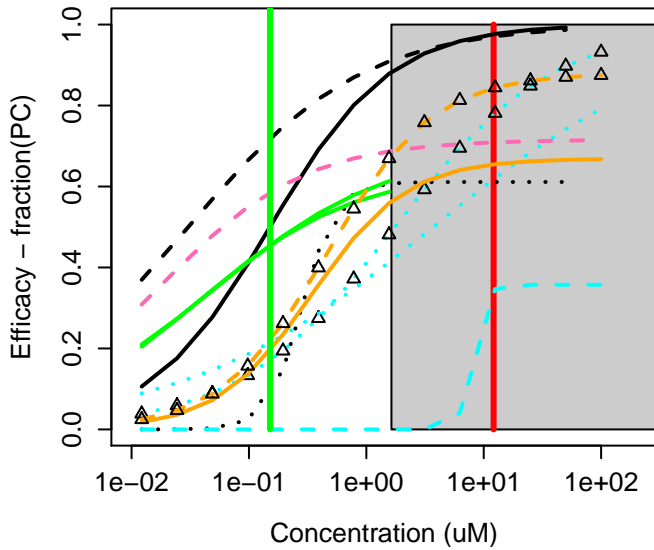

57-91-0 : 17alpha-Estradiol  
Agonist: 0.67 Antagonist: 0.092

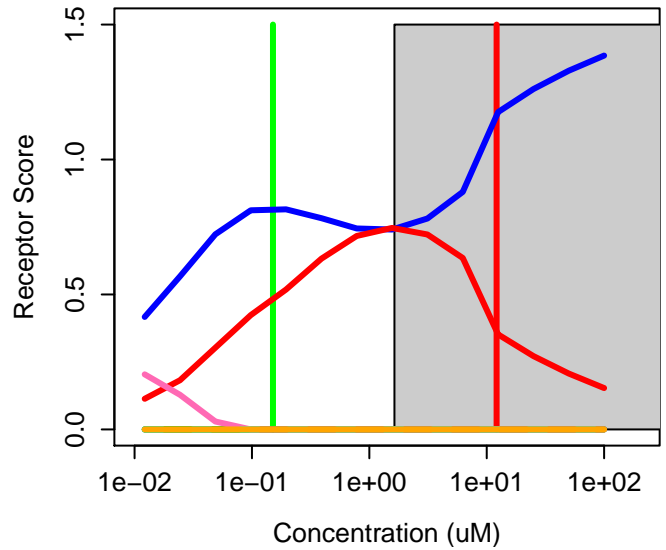

579-66-8 : 2,6-Diethylaniline



579-66-8 : 2,6-Diethylaniline  
Agonist: 0 Antagonist: 0



57966-95-7 : Cymoxanil

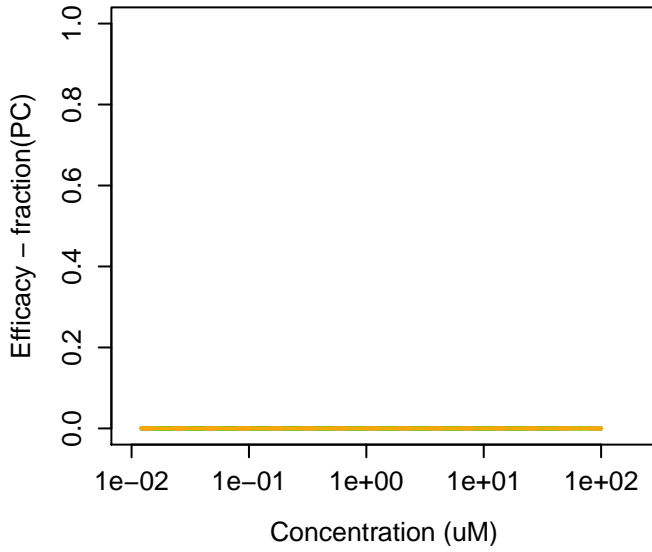

57966-95-7 : Cymoxanil  
Agonist: 0 Antagonist: 0



57-97-6 : 7,12-Dimethylbenz(a)anthracene

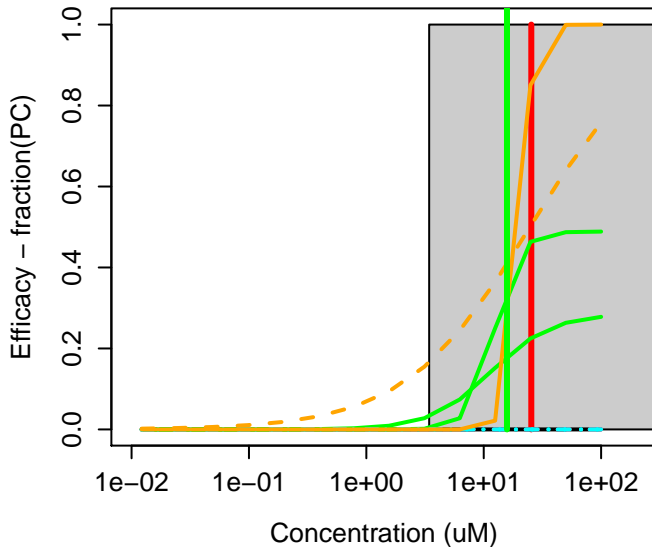

57-97-6 : 7,12-Dimethylbenz(a)anthracene  
Agonist: 0 Antagonist: 0.15

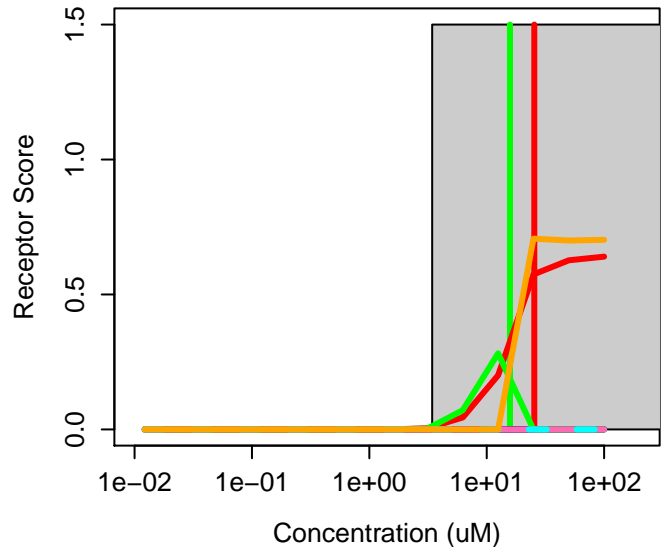

58-08-2 : Caffeine

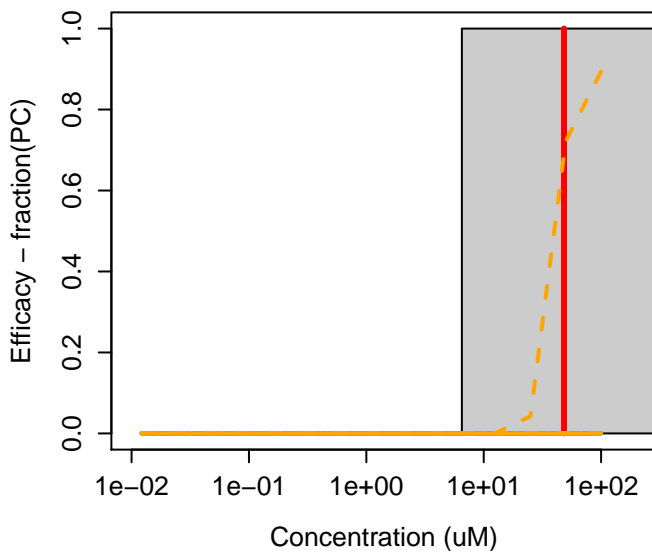

58-08-2 : Caffeine  
Agonist: 0 Antagonist: 0

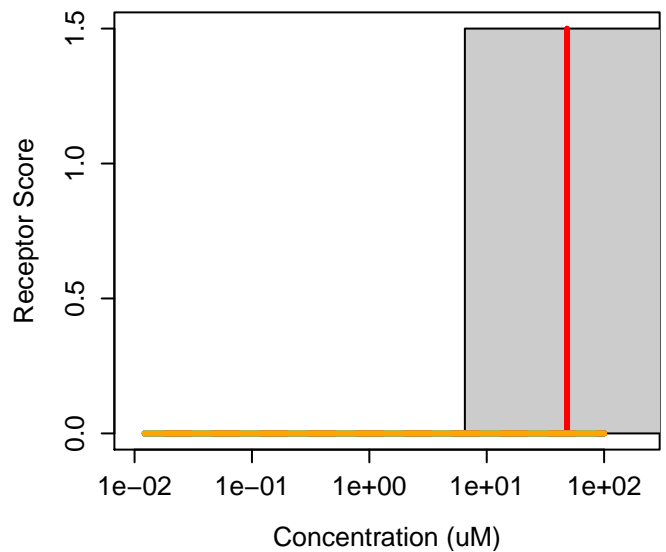

**58-14-0 : Pyrimethamine**

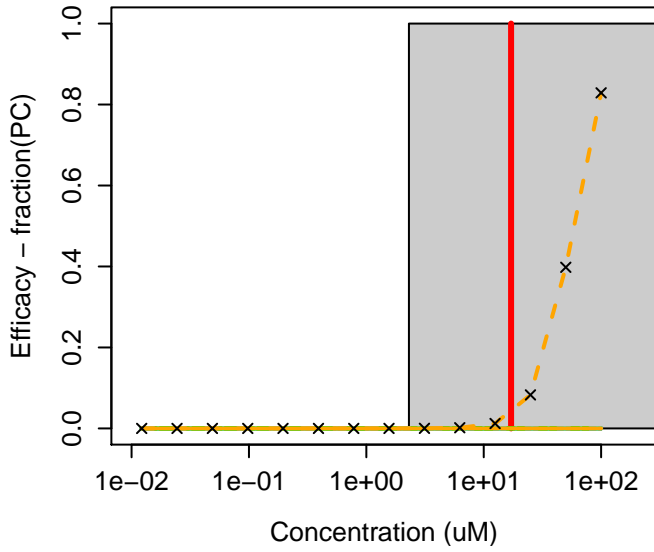

**58-14-0 : Pyrimethamine  
Agonist: 0 Antagonist: 0**

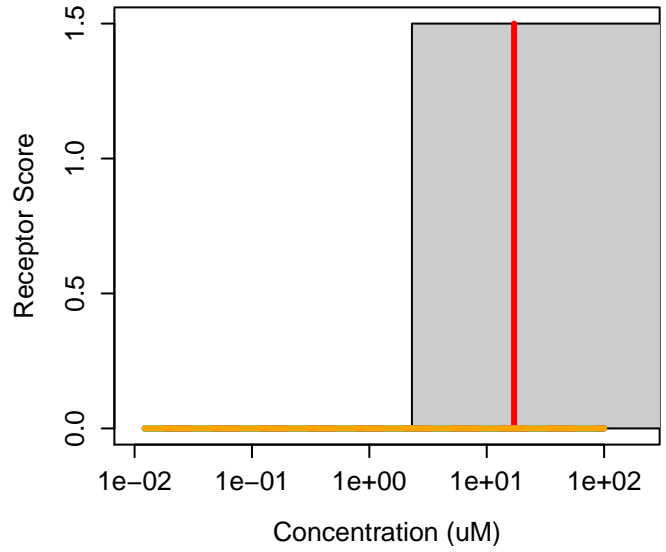

**58-18-4 : 17-Methyltestosterone**

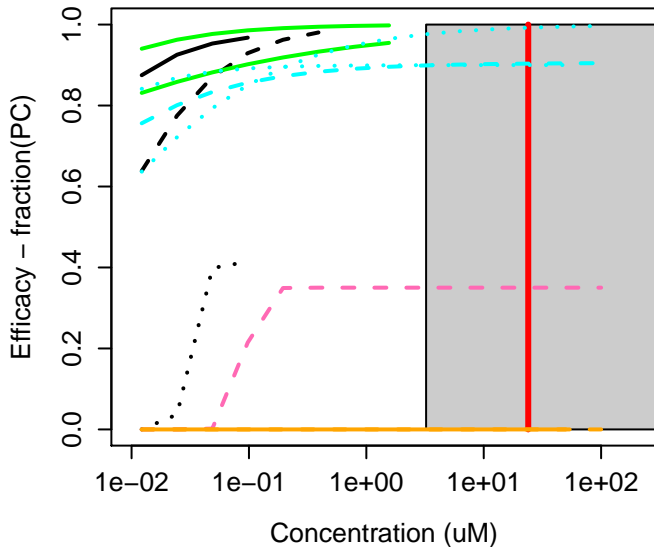

**58-18-4 : 17-Methyltestosterone  
Agonist: 1.5 Antagonist: 0**

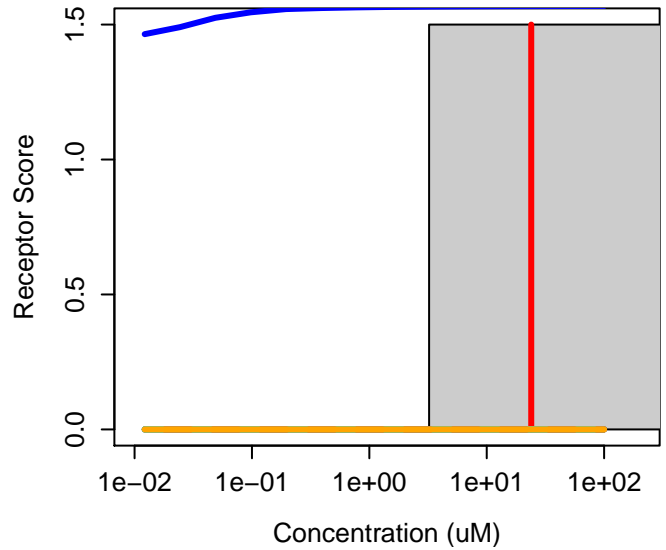

**583-78-8 : 2,5-Dichlorophenol**



**583-78-8 : 2,5-Dichlorophenol  
Agonist: 0 Antagonist: 0**



**58394-64-2 : Benzyloctyl adipate**



**58394-64-2 : Benzyloctyl adipate  
Agonist: 0 Antagonist: 0**



**584-13-4 : 4-Amino-1,2,4-triazole**



**584-13-4 : 4-Amino-1,2,4-triazole  
Agonist: 0 Antagonist: 0**



**58430-94-7 : 3,5,5-Trimethylhexyl acetate**



**58430-94-7 : 3,5,5-Trimethylhexyl acetate  
Agonist: 0 Antagonist: 0**



584-79-2 : Allethrin

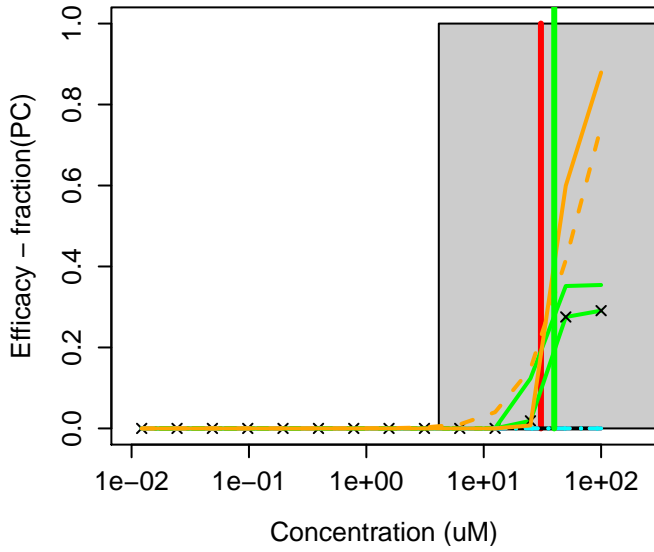

584-79-2 : Allethrin  
Agonist: 0 Antagonist: 0.078

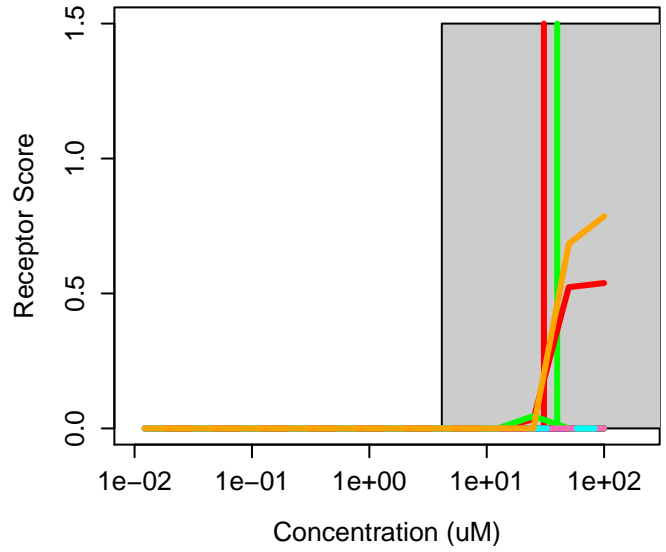

584-84-9 : Toluene-2,4-diisocyanate

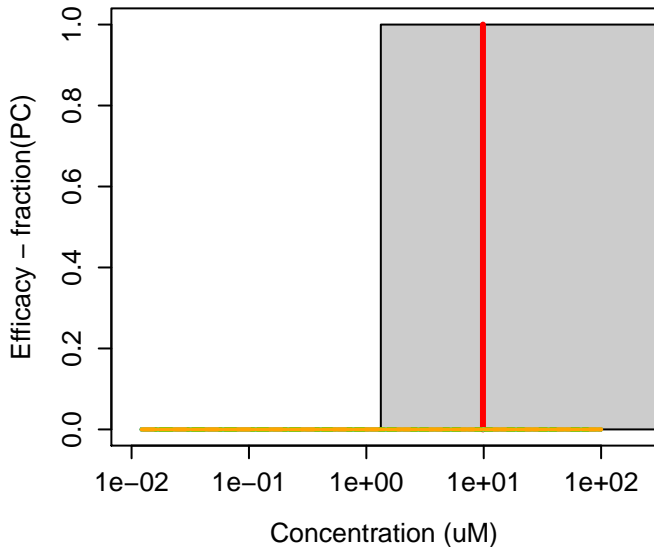

584-84-9 : Toluene-2,4-diisocyanate  
Agonist: 0 Antagonist: 0

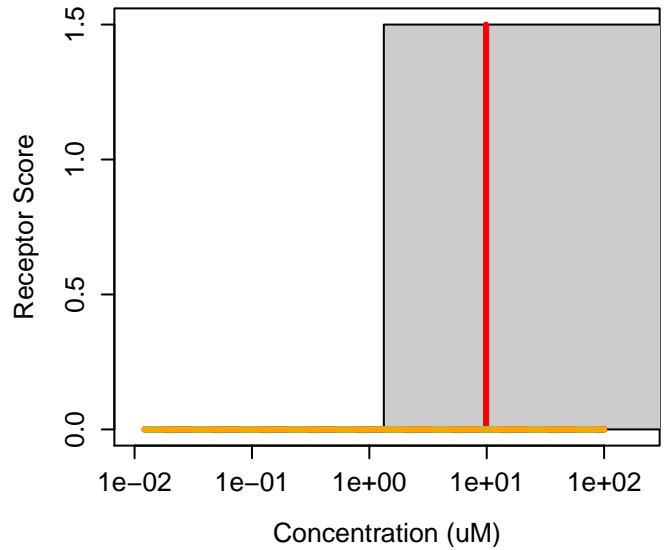

5850-86-2 : C.I. Acid Orange 8, monosodium sal

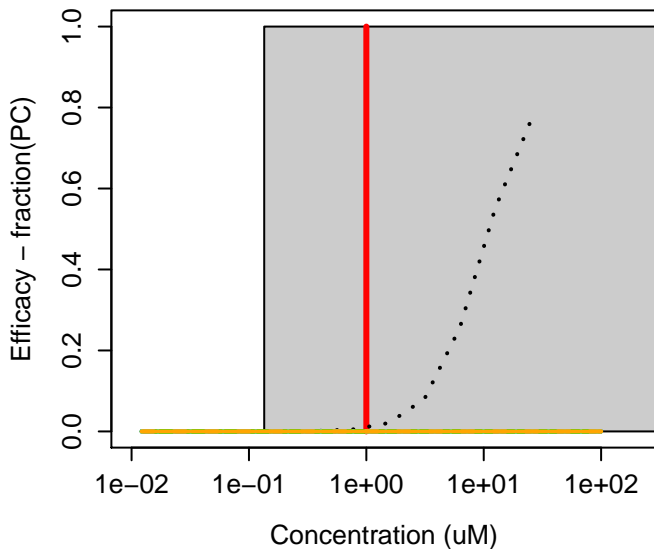

5850-86-2 : C.I. Acid Orange 8, monosodium sal  
Agonist: 4.8e-05 Antagonist: 5.3e-05

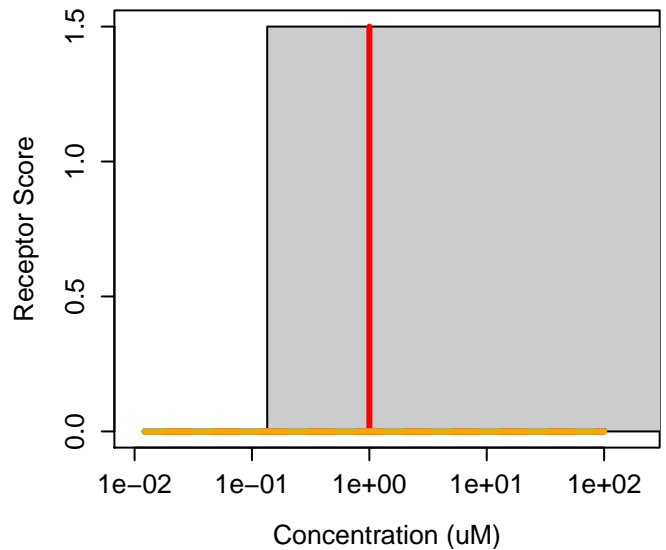



**585-34-2 : 3-tert-Butylphenol**



**585-34-2 : 3-tert-Butylphenol  
Agonist: 0 Antagonist: 0**



**58-55-9 : Theophylline**

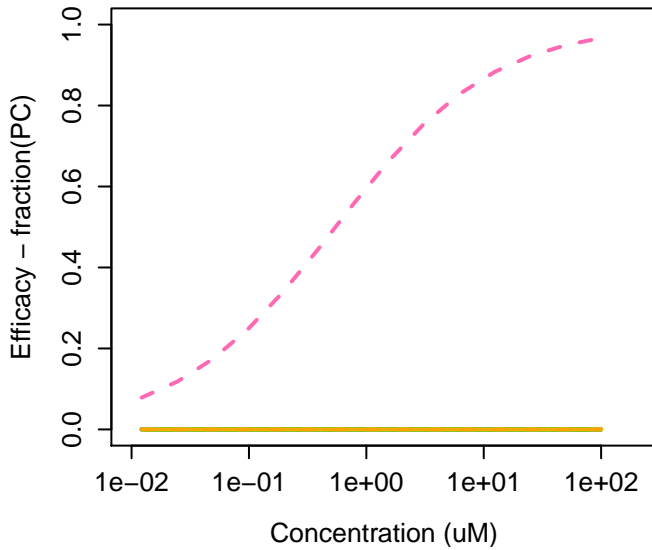

**58-55-9 : Theophylline  
Agonist: 0 Antagonist: 0**

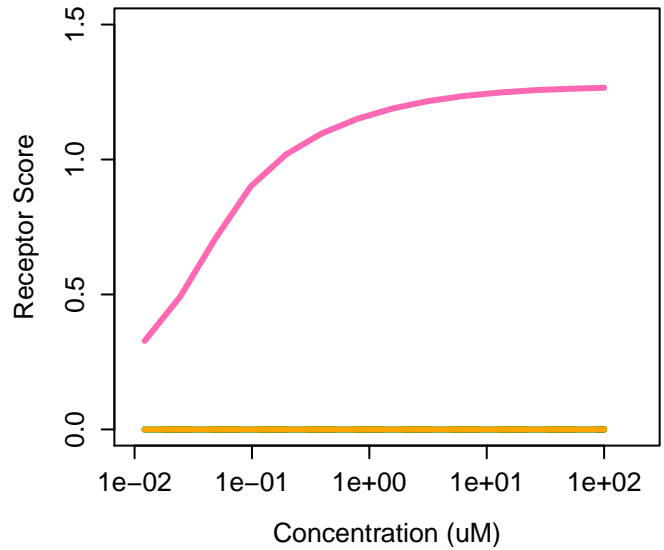

**58-56-0 : Pyridoxine hydrochloride**



**58-56-0 : Pyridoxine hydrochloride  
Agonist: 0 Antagonist: 0**



586-62-9 : Terpinolene



586-62-9 : Terpinolene  
Agonist: 0 Antagonist: 0



5870-93-9 : Heptyl butanoate



5870-93-9 : Heptyl butanoate  
Agonist: 0 Antagonist: 0



58-72-0 : Triphenylethylene

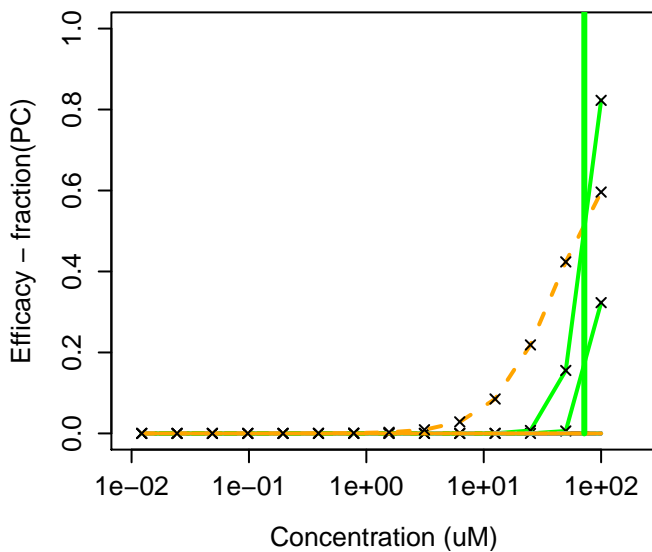

58-72-0 : Triphenylethylene  
Agonist: 0 Antagonist: 0.044

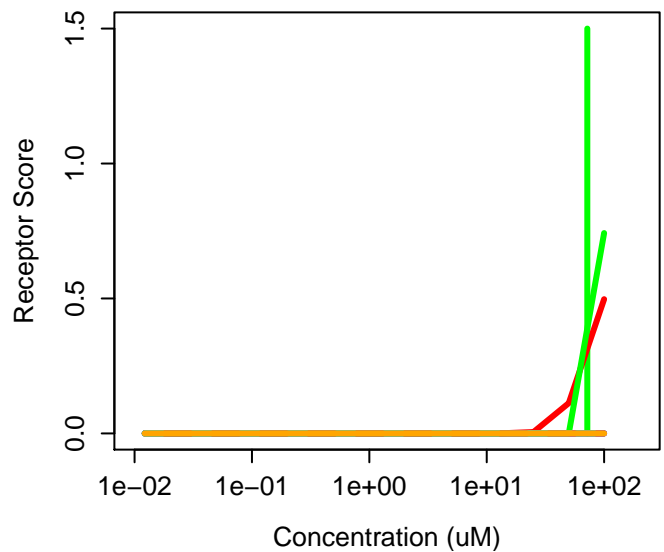

**587-65-5 : 2-Chloro-N-phenylacetamide**

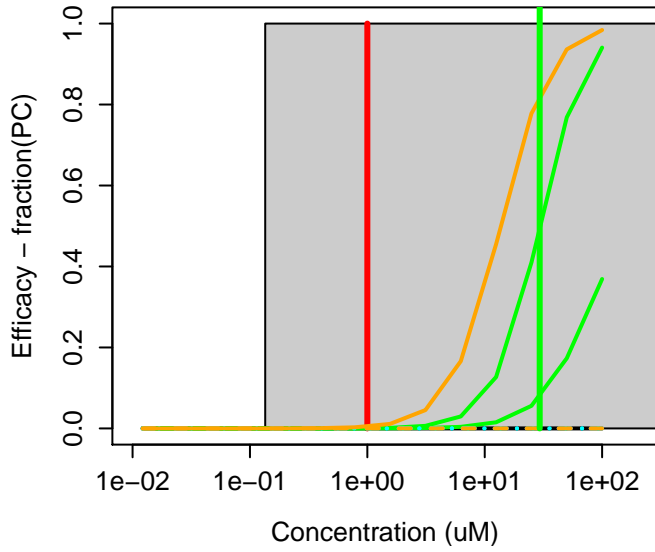

**587-65-5 : 2-Chloro-N-phenylacetamide**  
Agonist: 0 Antagonist: 0.13

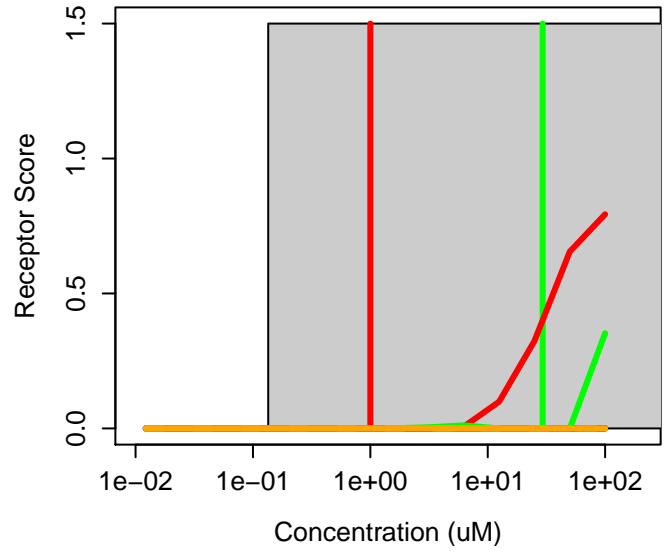

**5877-42-9 : 4-Ethyloct-1-yn-3-ol**

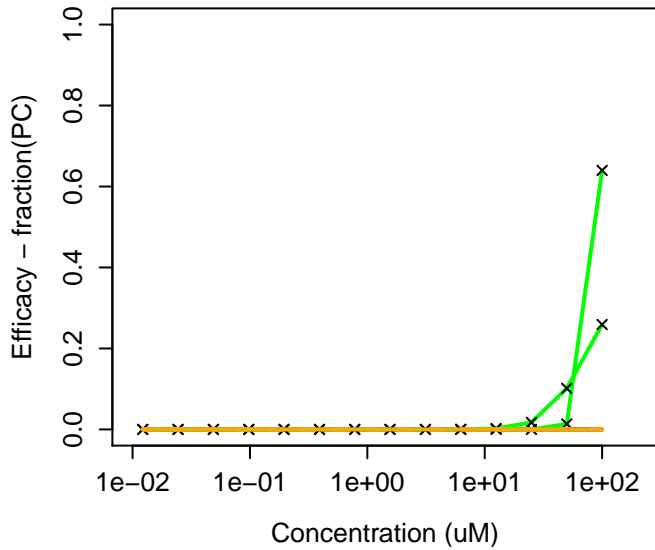

**5877-42-9 : 4-Ethyloct-1-yn-3-ol**  
Agonist: 0 Antagonist: 0

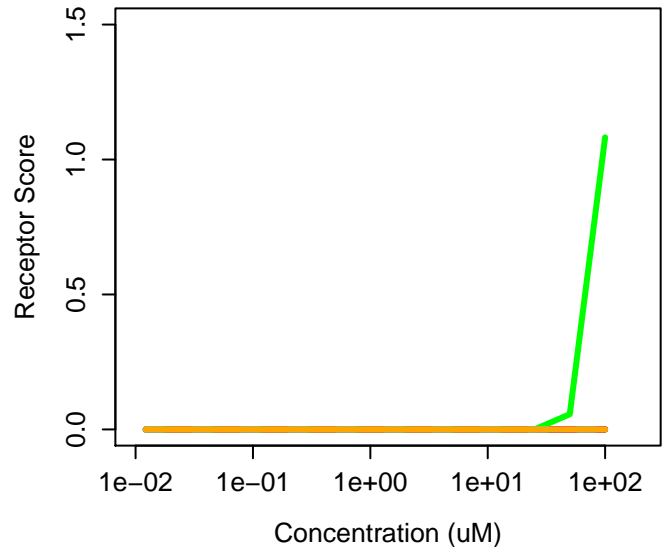

**587-85-9 : Diphenylmercury(II)**

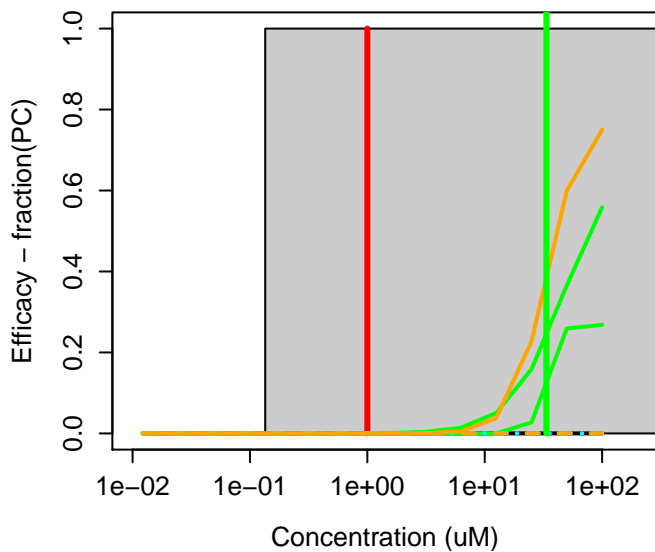

**587-85-9 : Diphenylmercury(II)**  
Agonist: 0 Antagonist: 0.069

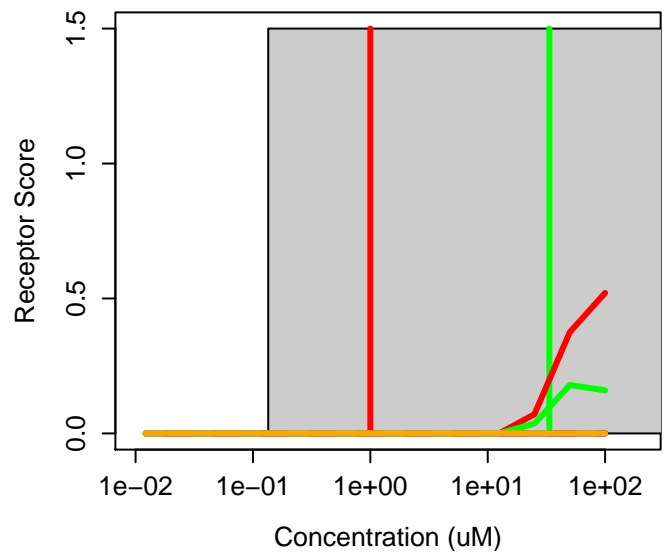

58846-77-8 : Decyl beta-D-glucopyranoside

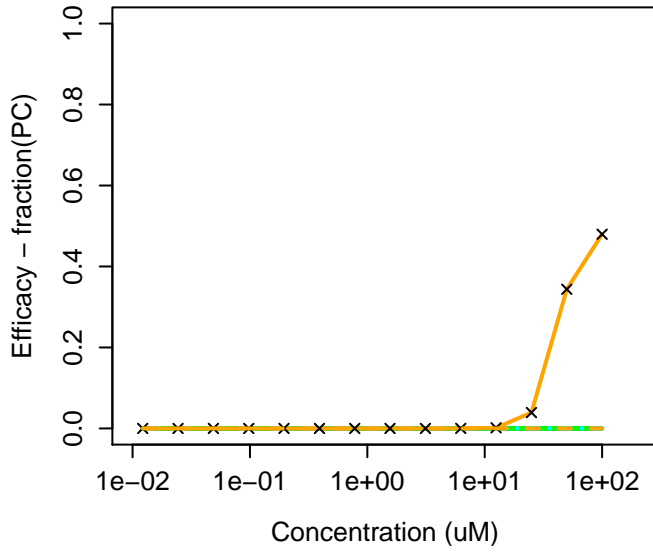

58846-77-8 : Decyl beta-D-glucopyranoside  
Agonist: 0 Antagonist: 0



58-85-5 : Biotin



58-85-5 : Biotin  
Agonist: 0 Antagonist: 0



58-86-6 : D-Xylose



58-86-6 : D-Xylose  
Agonist: 0 Antagonist: 0



588941-45-1 : PharmaGSID\_48506

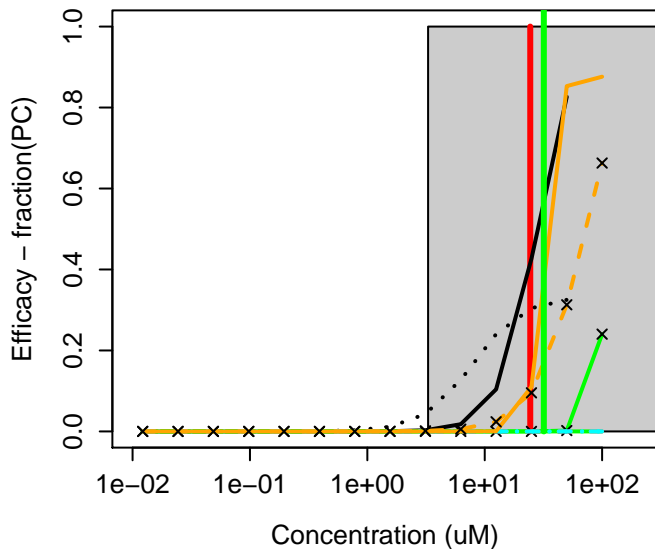

588941-45-1 : PharmaGSID\_48506  
Agonist: 0 Antagonist: 0.18

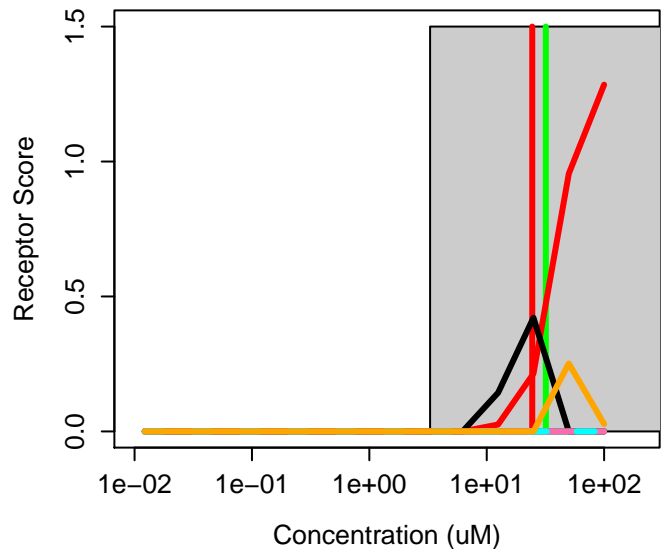

58-89-9 : Lindane

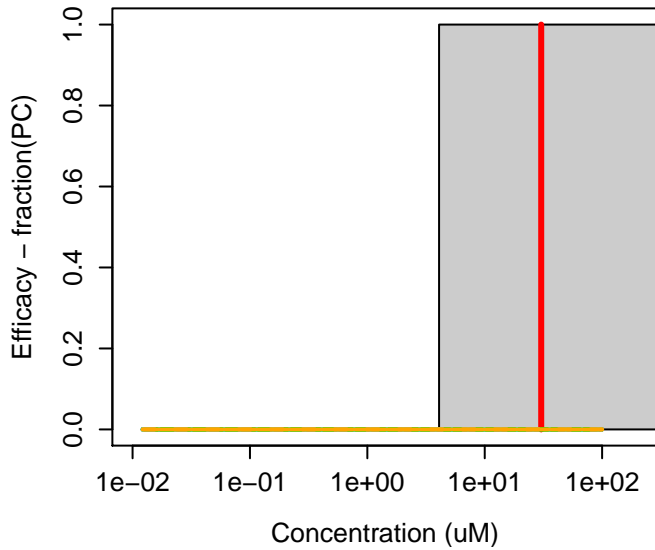

58-89-9 : Lindane  
Agonist: 0 Antagonist: 0

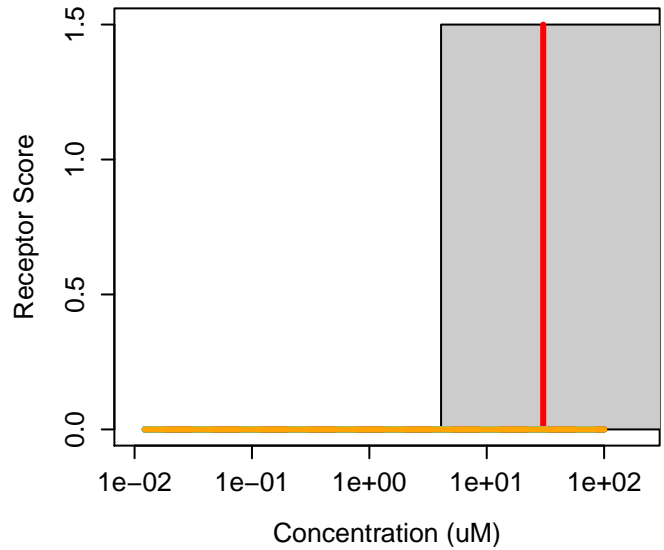

58-93-5 : Hydrochlorothiazide

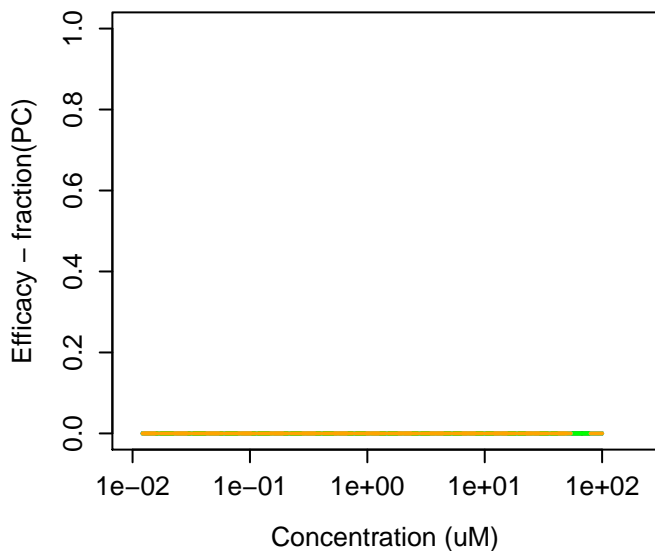

58-93-5 : Hydrochlorothiazide  
Agonist: 0 Antagonist: 0



589-68-4 : Tetradecanoic acid, 2,3-dihydroxypropyl Agonist: 0 Antagonist: 0



5902-51-2 : Terbacil

5902-51-2 : Terbacil  
Agonist: 0 Antagonist: 0



59-05-2 : Methotrexate

59-05-2 : Methotrexate  
Agonist: 0 Antagonist: 0

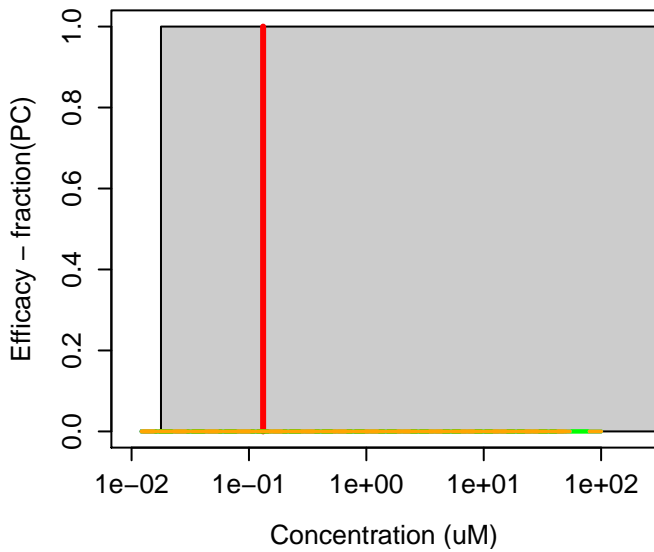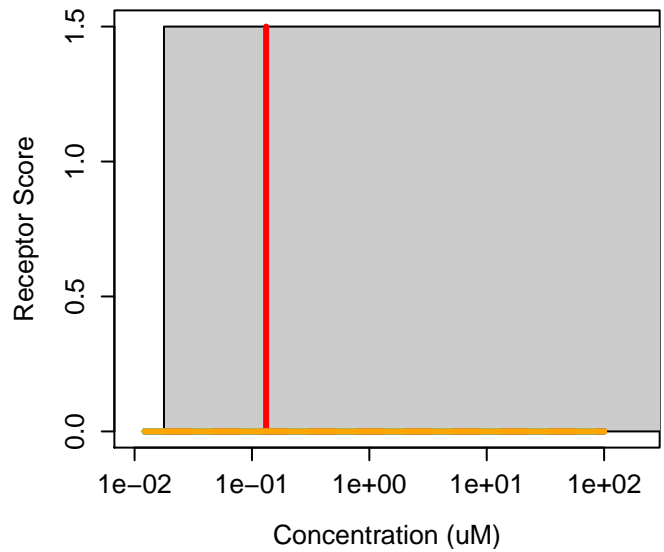

5915-41-3 : Terbutylazine

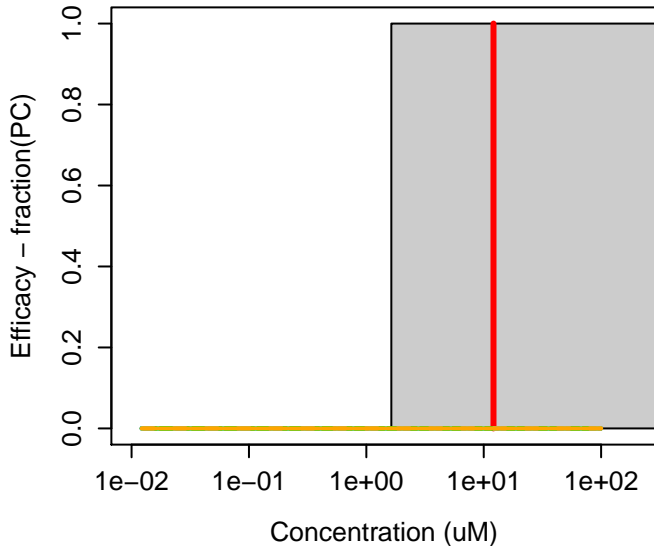

5915-41-3 : Terbutylazine  
Agonist: 0 Antagonist: 0

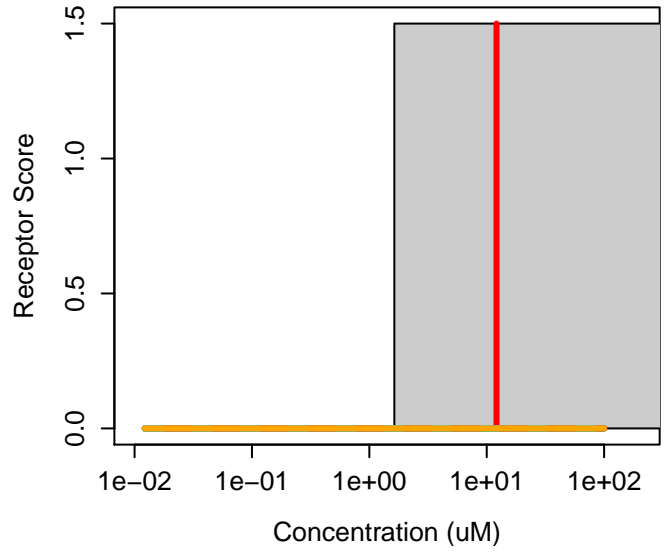

59227-89-3 : Laurocapram

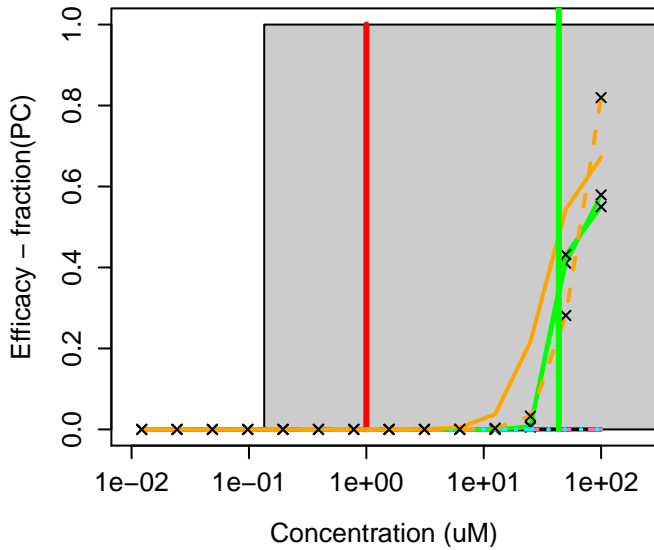

59227-89-3 : Laurocapram  
Agonist: 0 Antagonist: 0.11

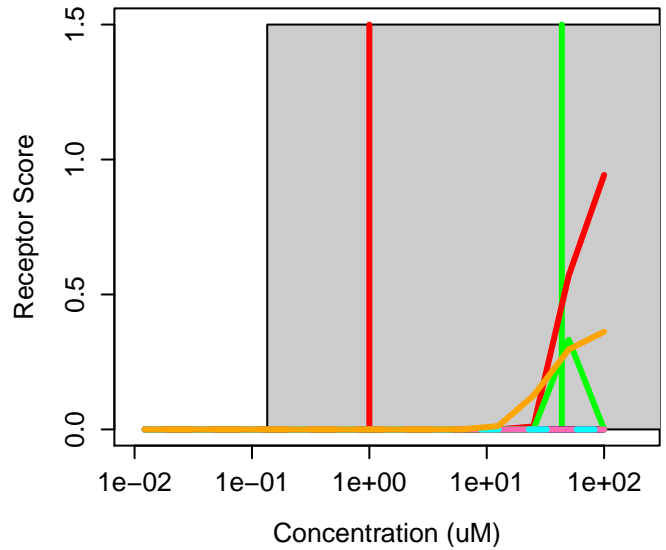

59-30-3 : Folic acid

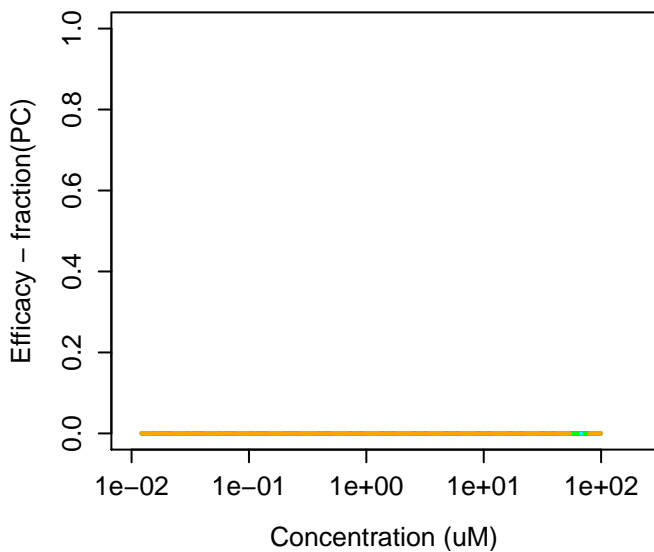

59-30-3 : Folic acid  
Agonist: 0 Antagonist: 0



**59-40-5 : Sulfaquinoxaline**

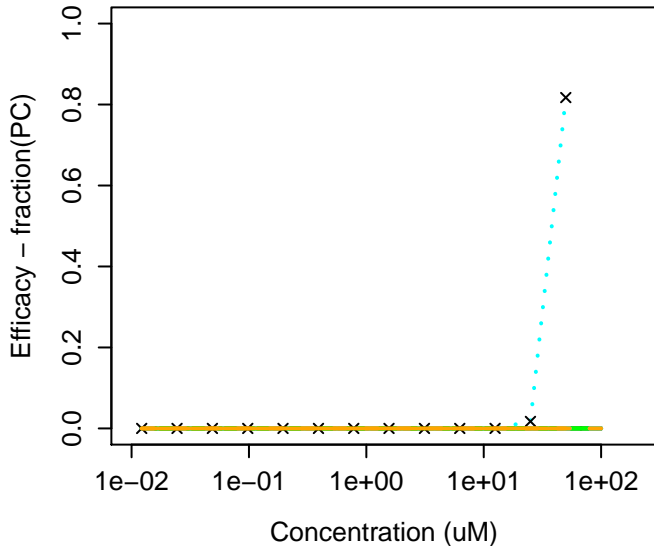

**59-40-5 : Sulfaquinoxaline  
Agonist: 0 Antagonist: 0**



**594-20-7 : 2,2-Dichloropropane**



**594-20-7 : 2,2-Dichloropropane  
Agonist: 0 Antagonist: 0**



**59-50-7 : 4-Chloro-3-methylphenol**

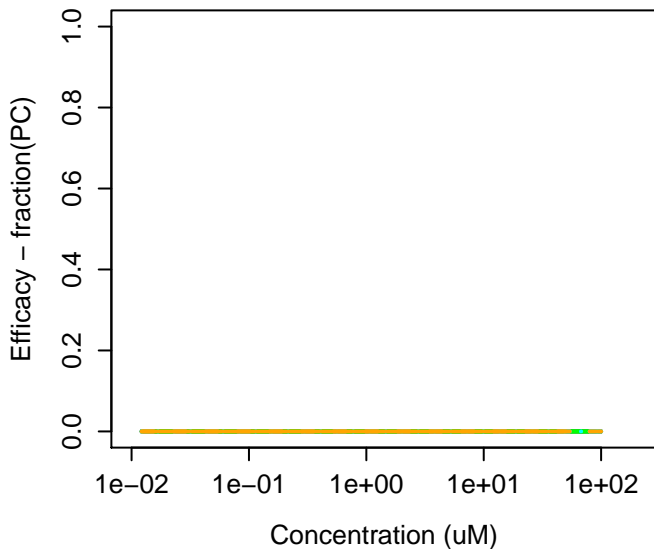

**59-50-7 : 4-Chloro-3-methylphenol  
Agonist: 0 Antagonist: 0**





59669-26-0 : Thiodicarb

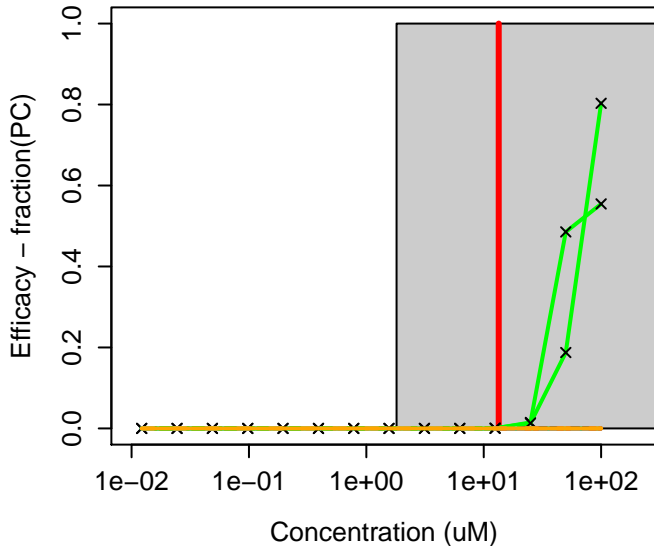

59669-26-0 : Thiodicarb  
Agonist: 0 Antagonist: 0

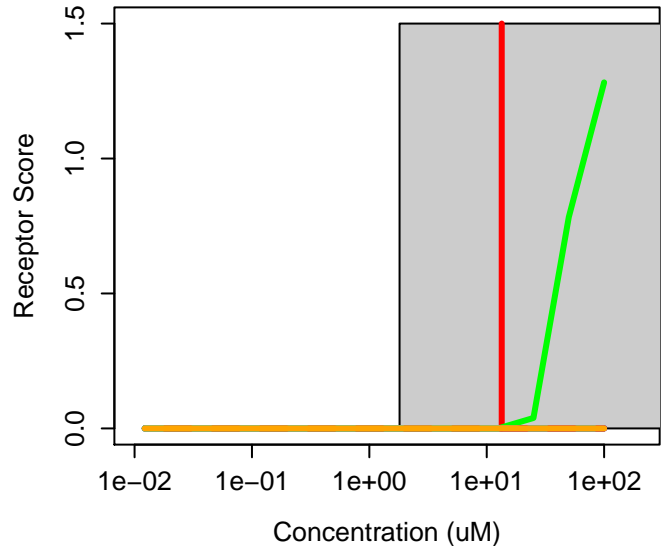

59-67-6 : Nicotinic acid



59-67-6 : Nicotinic acid  
Agonist: 0 Antagonist: 0



59756-60-4 : Fluridone



59756-60-4 : Fluridone  
Agonist: 0 Antagonist: 0



598-55-0 : Methyl carbamate



598-55-0 : Methyl carbamate  
Agonist: 0 Antagonist: 0



59-87-0 : Nitrofurazone

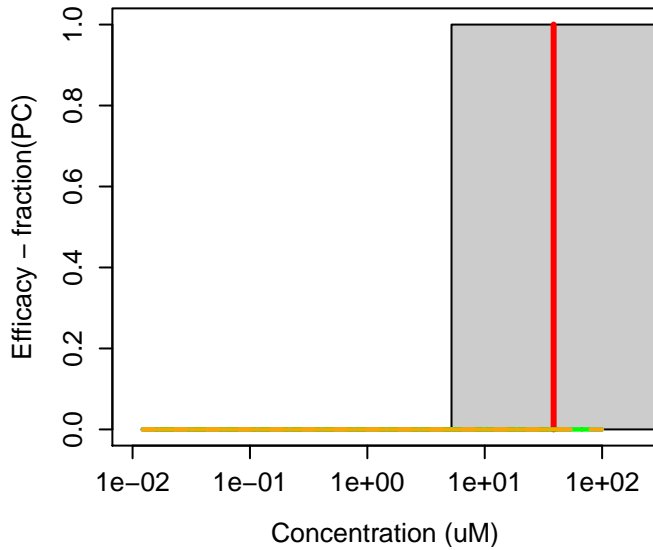

59-87-0 : Nitrofurazone  
Agonist: 0 Antagonist: 0

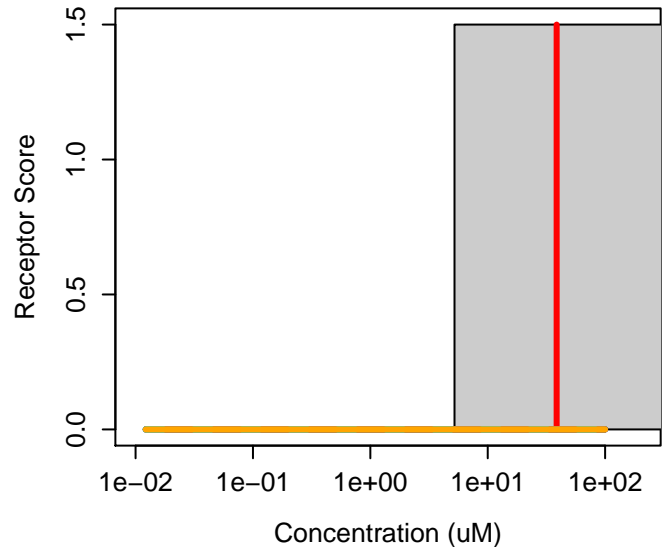

599-64-4 : 4-Cumylphenol

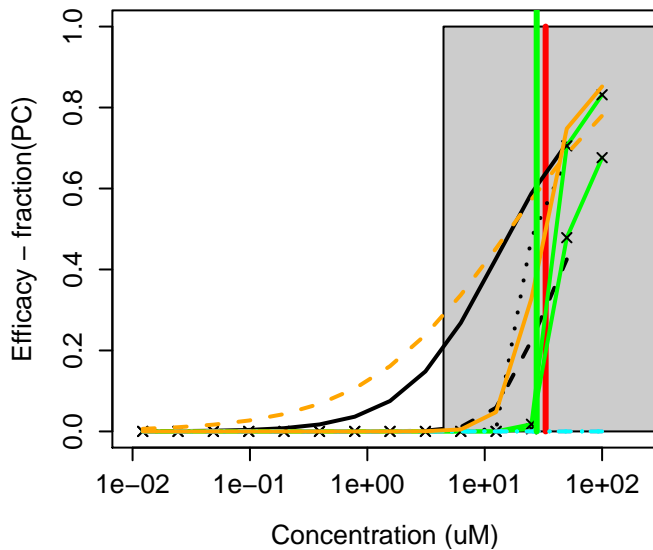

599-64-4 : 4-Cumylphenol  
Agonist: 0 Antagonist: 0.31

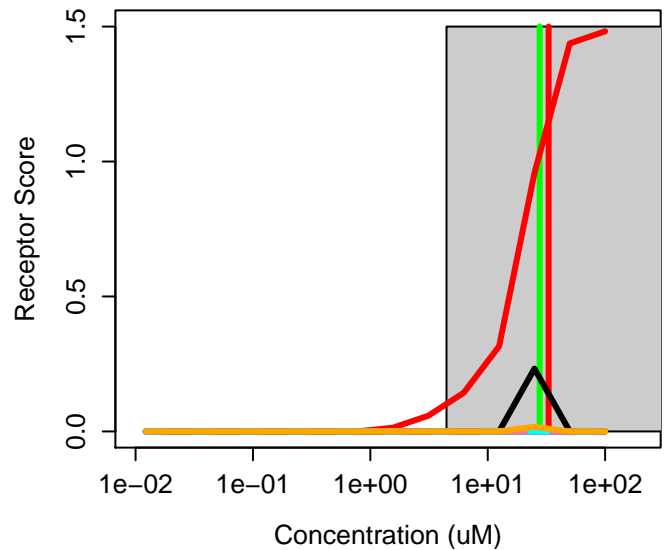

599-79-1 : Sulfasalazine

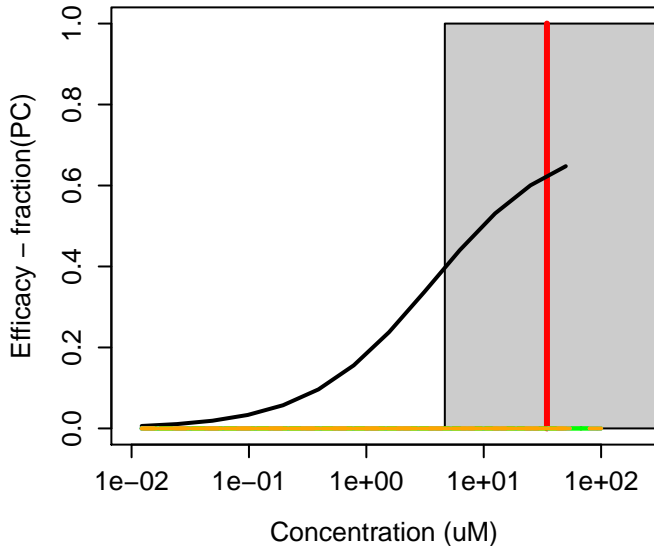

599-79-1 : Sulfasalazine  
Agonist: 0 Antagonist: 3.5e-05

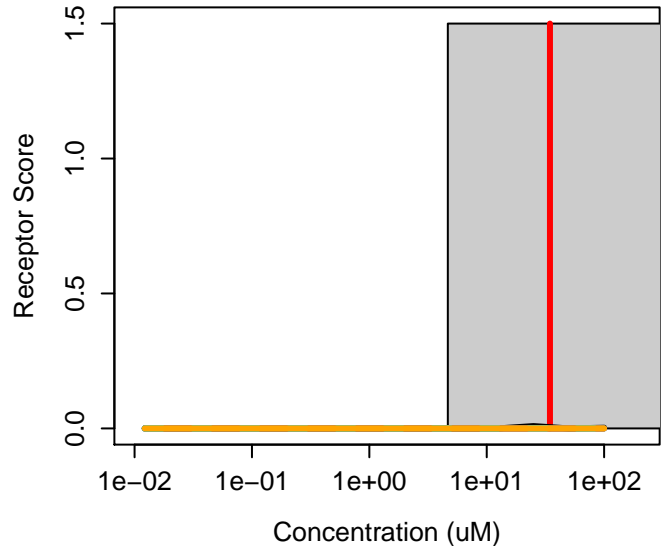

60-09-3 : 4-Aminoazobenzene

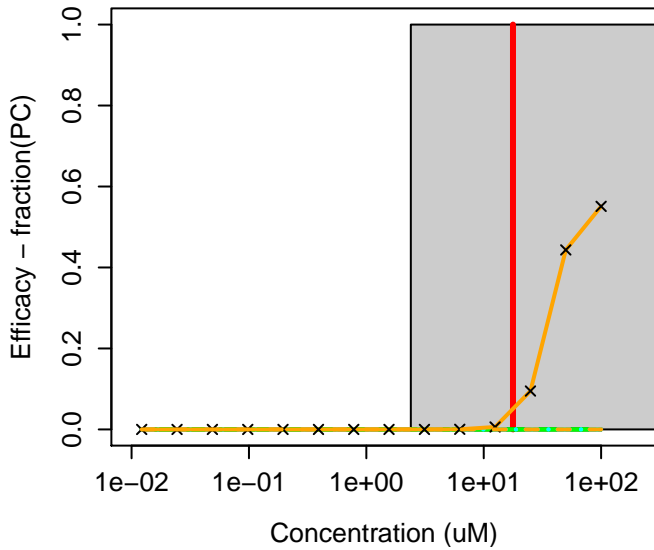

60-09-3 : 4-Aminoazobenzene  
Agonist: 0 Antagonist: 0

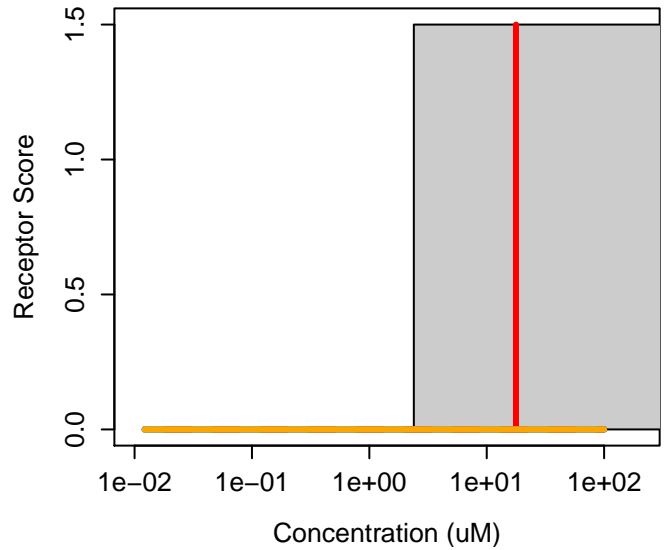

60-12-8 : 2-Phenylethanol

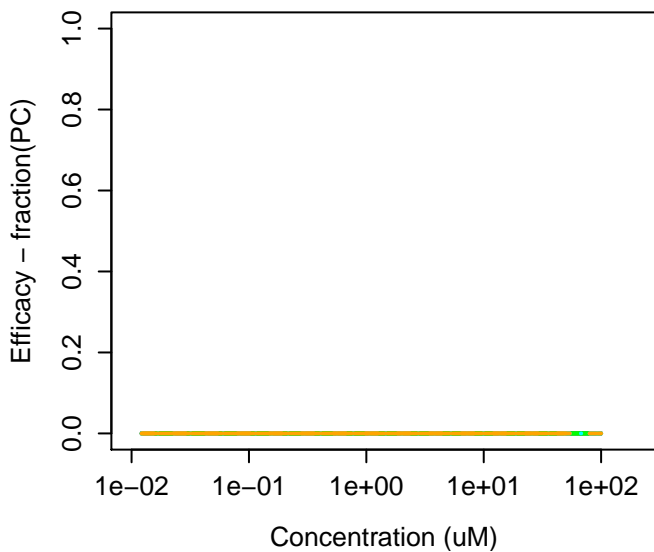

60-12-8 : 2-Phenylethanol  
Agonist: 0 Antagonist: 0



60168-88-9 : Fenarimol

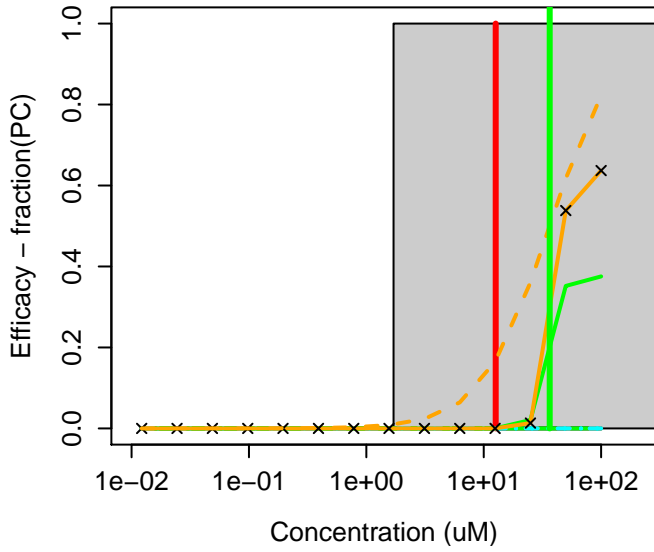

60168-88-9 : Fenarimol  
Agonist: 0 Antagonist: 0.045

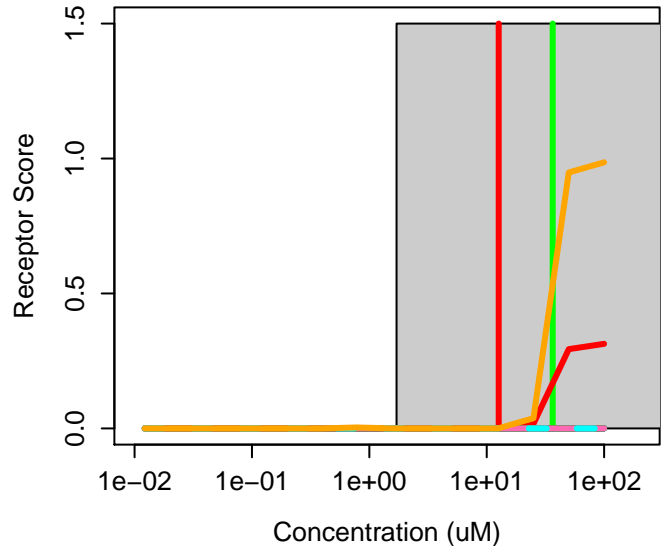

602-01-7 : 2,3-Dinitrotoluene

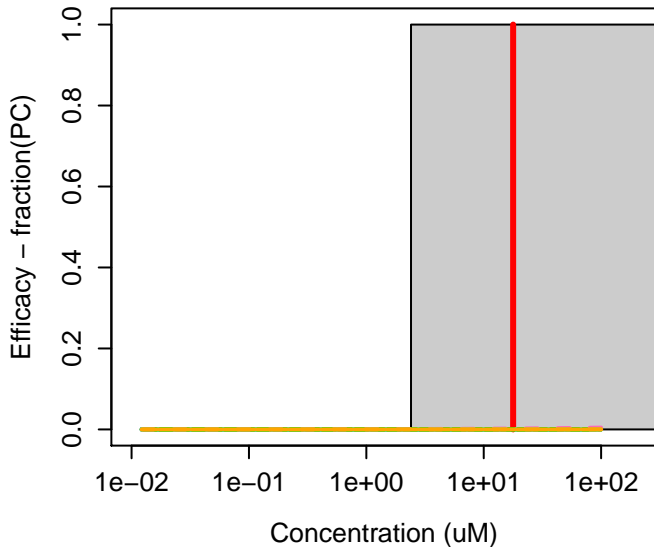

602-01-7 : 2,3-Dinitrotoluene  
Agonist: 0 Antagonist: 0

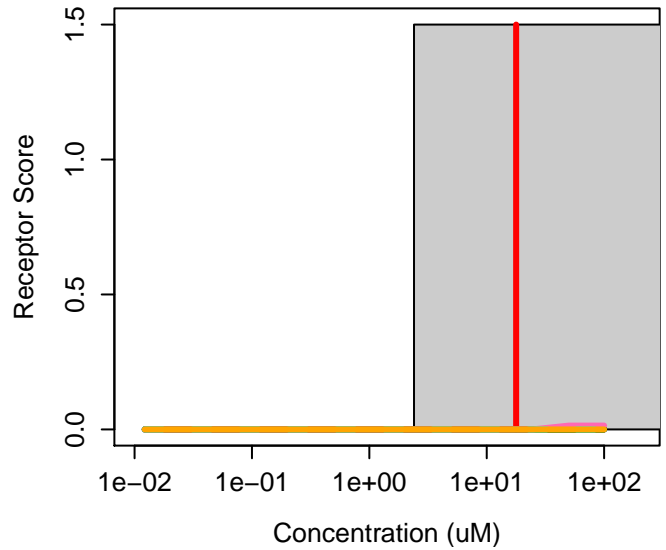

60207-90-1 : Propiconazole

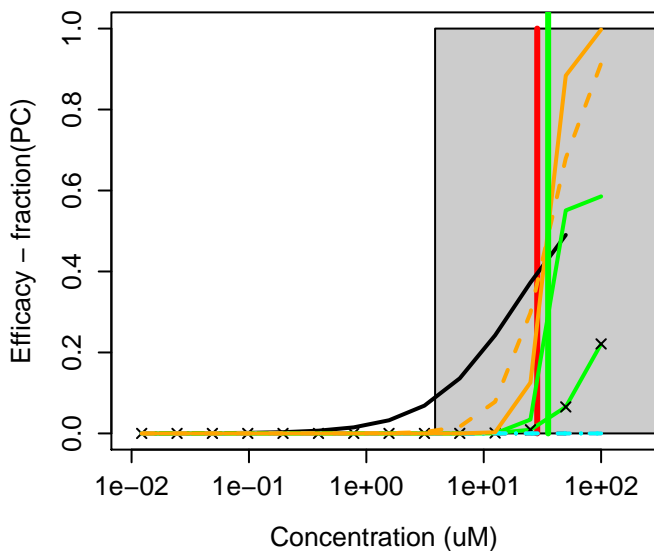

60207-90-1 : Propiconazole  
Agonist: 0 Antagonist: 0.17

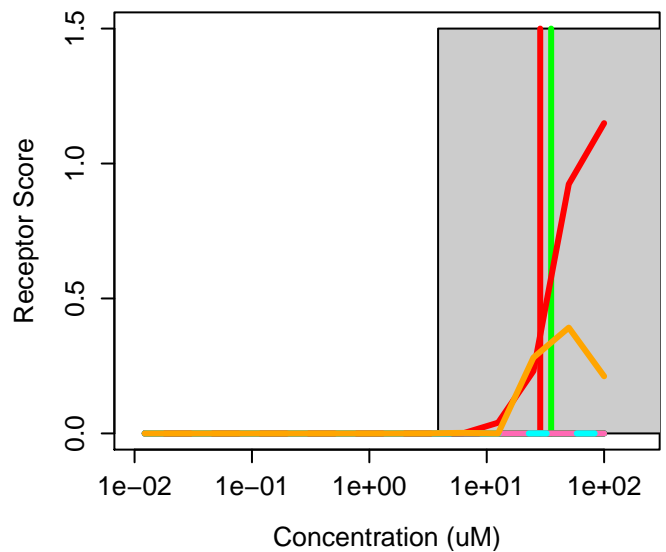

**60-33-3 : Linoleic acid**

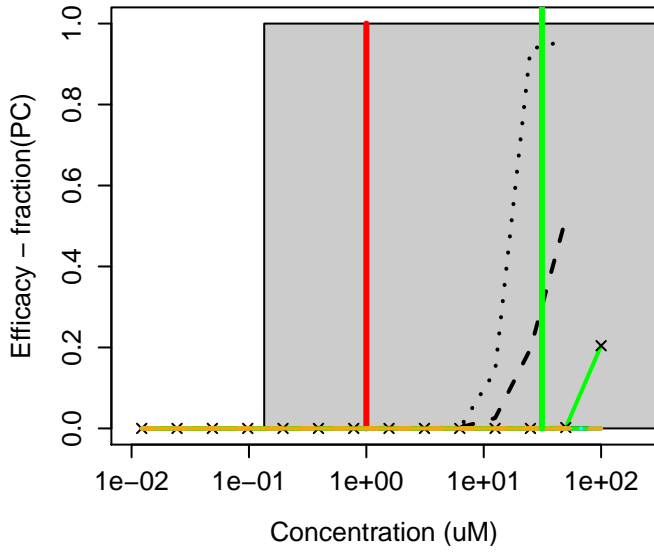

**60-33-3 : Linoleic acid**  
Agonist: 0.0061 Antagonist: 0.012

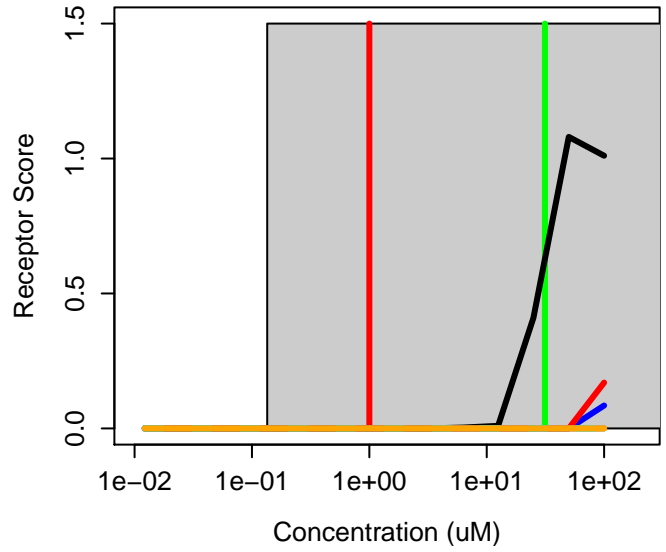

**603-35-0 : Triphenylphosphine**



**603-35-0 : Triphenylphosphine**  
Agonist: 0 Antagonist: 0



**60-35-5 : Acetamide**



**60-35-5 : Acetamide**  
Agonist: 0 Antagonist: 0



604-75-1 : Oxazepam

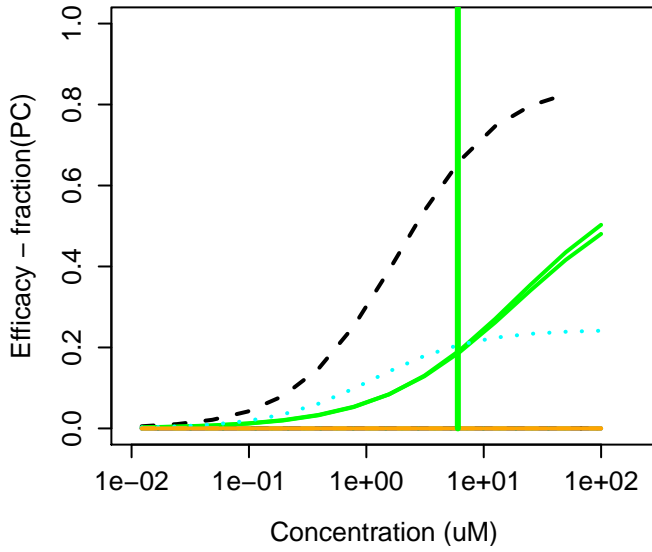

604-75-1 : Oxazepam  
Agonist: 0.16 Antagonist: 0.09

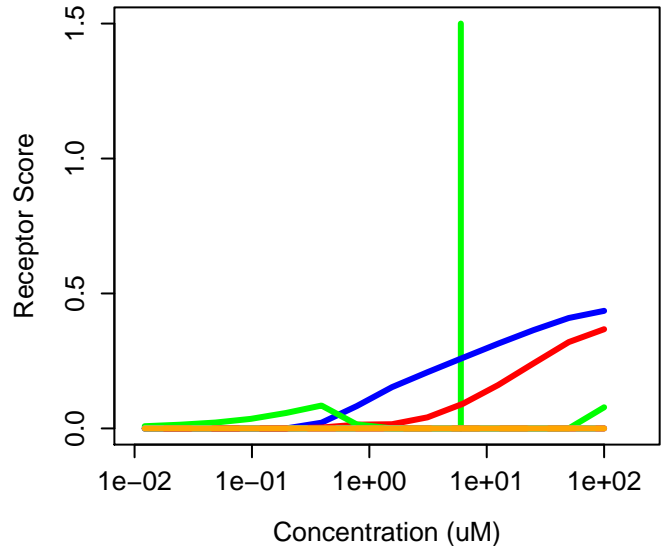

60-51-5 : Dimethoate



60-51-5 : Dimethoate  
Agonist: 0 Antagonist: 0



605-45-8 : Diisopropyl phthalate



605-45-8 : Diisopropyl phthalate  
Agonist: 0 Antagonist: 0



60-54-8 : Tetracycline

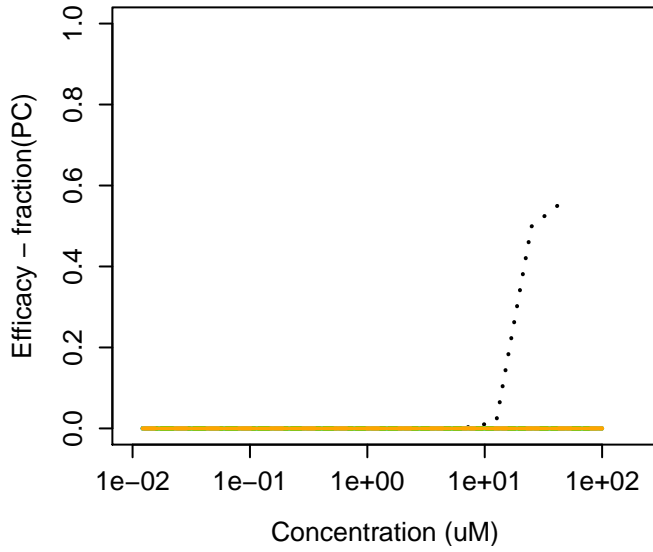

60-54-8 : Tetracycline  
Agonist: 0 Antagonist: 0

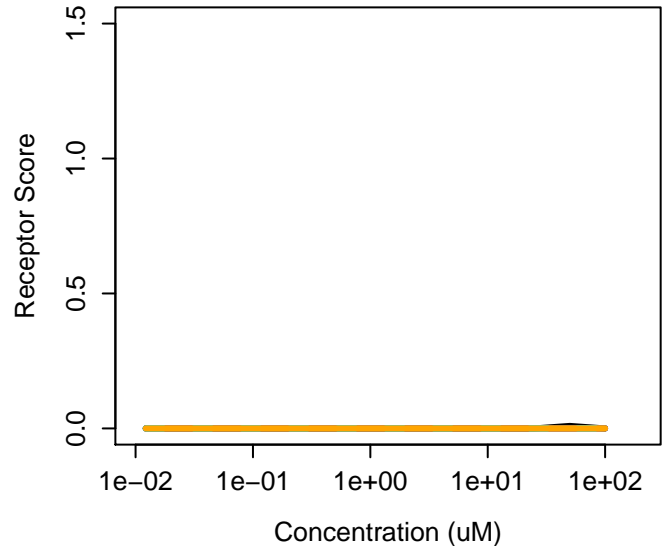

6055-19-2 : Cyclophosphamide monohydrate



6055-19-2 : Cyclophosphamide monohydrate  
Agonist: 0 Antagonist: 0



60-56-0 : Methimazole

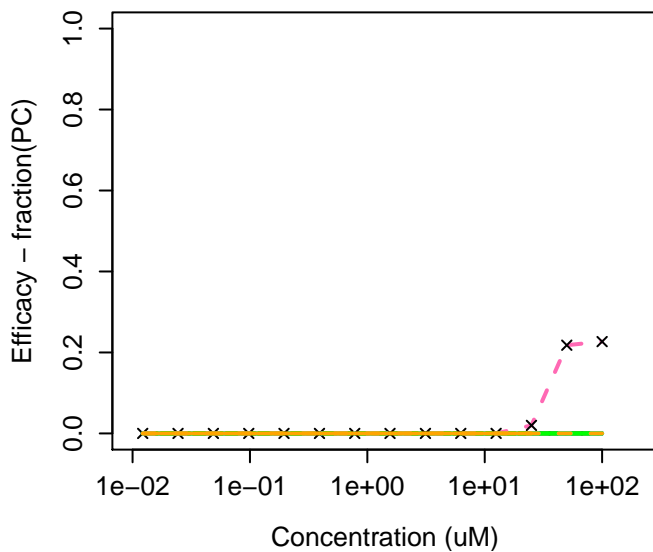

60-56-0 : Methimazole  
Agonist: 0 Antagonist: 0

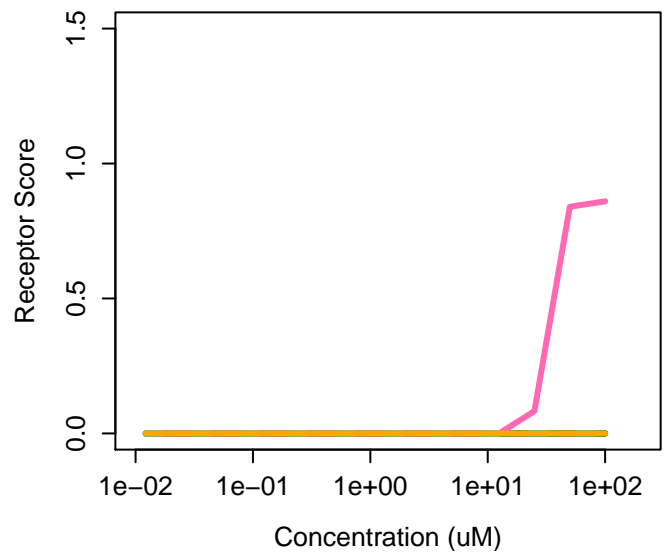

**60-57-1 : Dieldrin**

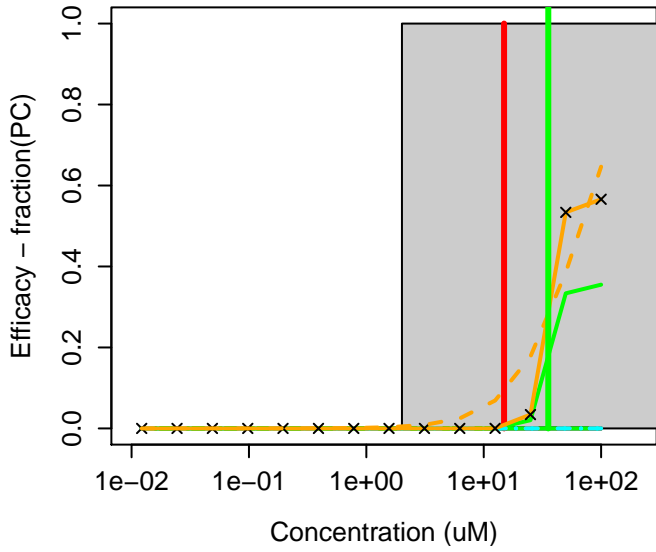

**60-57-1 : Dieldrin**  
Agonist: 0 Antagonist: 0.042

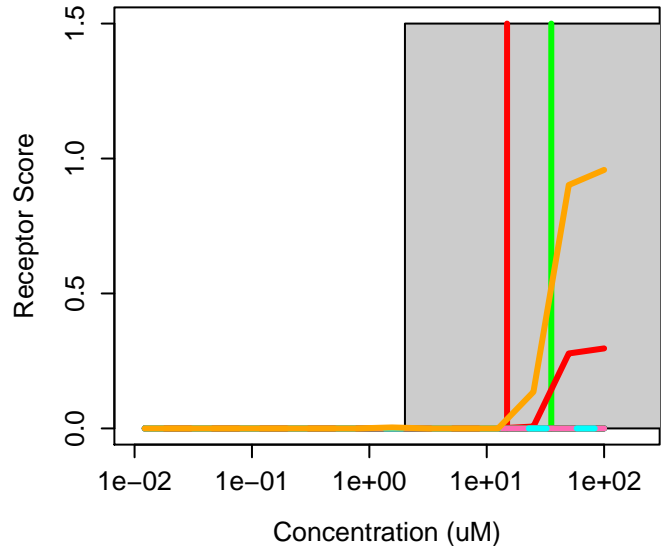

**606-20-2 : 2,6-Dinitrotoluene**

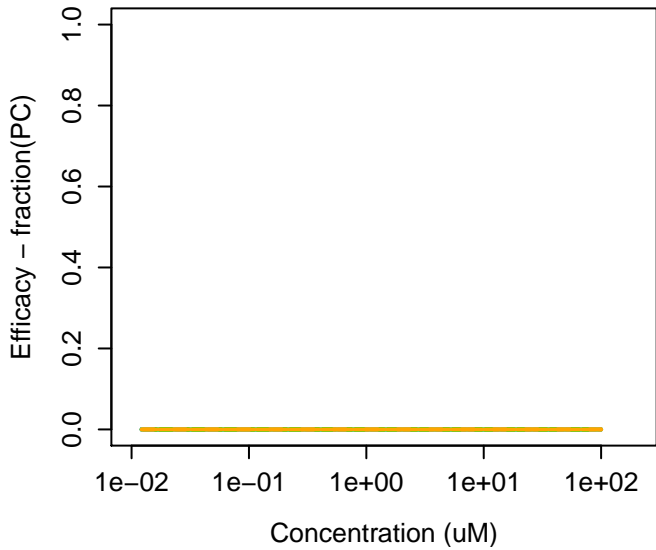

**606-20-2 : 2,6-Dinitrotoluene**  
Agonist: 0 Antagonist: 0



**6088-51-3 : 6-Hydroxy-2-naphthyl disulfide**

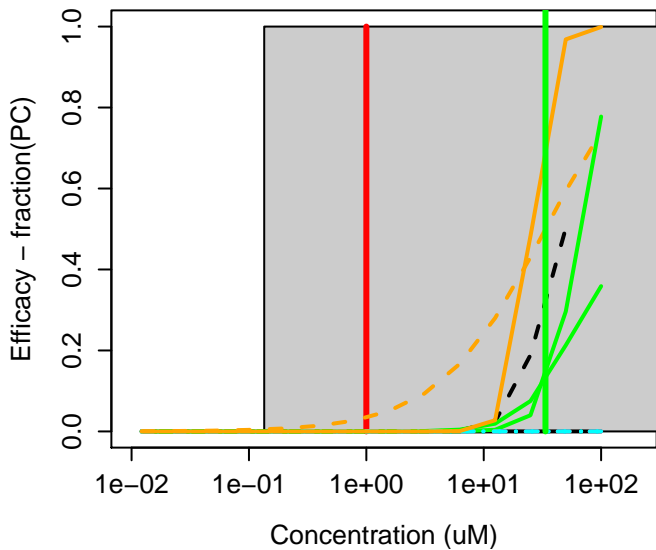

**6088-51-3 : 6-Hydroxy-2-naphthyl disulfide**  
Agonist: 0 Antagonist: 0.18

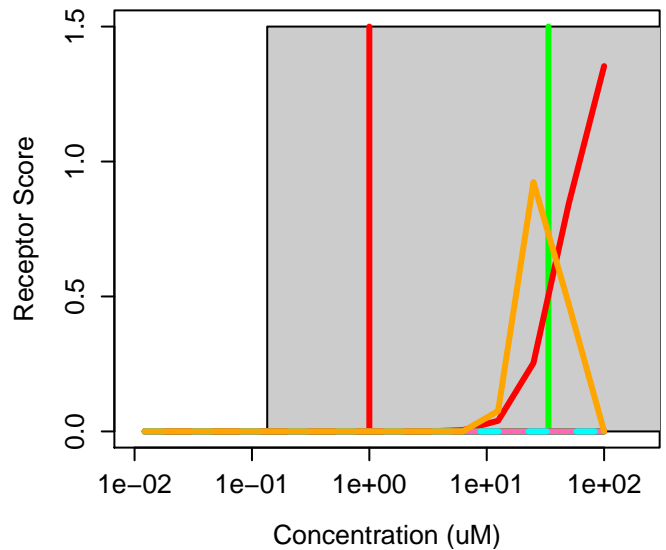



609-54-1 : 2,5-Dimethylbenzenesulfonic acid



609-54-1 : 2,5-Dimethylbenzenesulfonic acid  
Agonist: 0 Antagonist: 0



611-20-1 : 2-Hydroxybenzonitrile

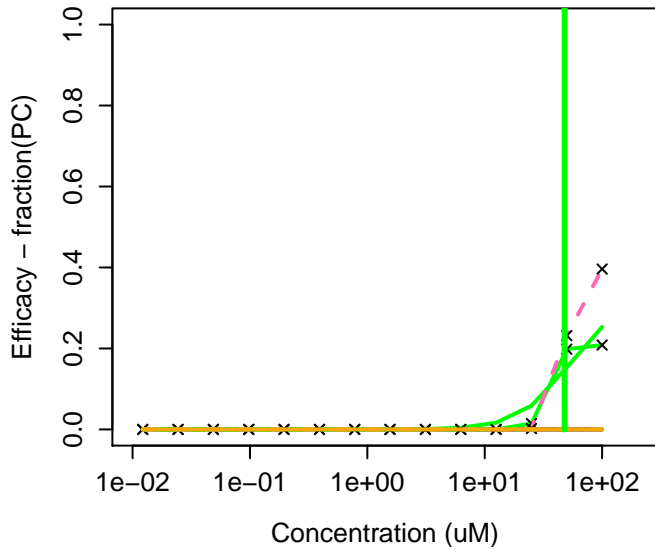

611-20-1 : 2-Hydroxybenzonitrile  
Agonist: 0.016 Antagonist: 0

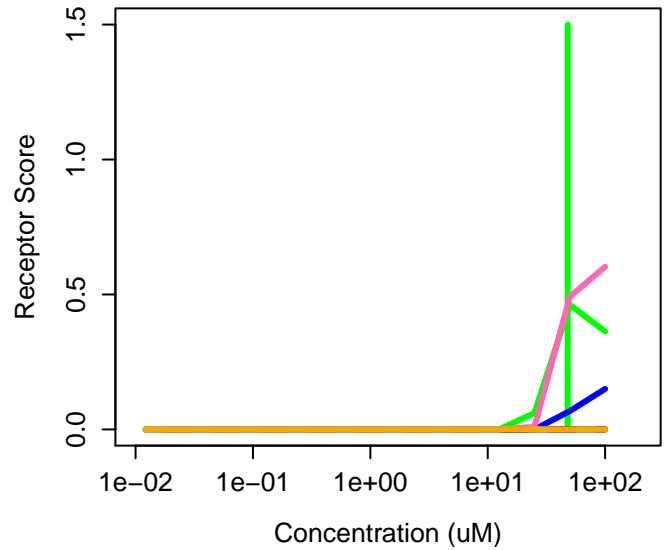

611-70-1 : Isopropyl phenyl ketone



611-70-1 : Isopropyl phenyl ketone  
Agonist: 0 Antagonist: 0



612-82-8 : 3,3'-Dimethylbenzidine dihydrochloric

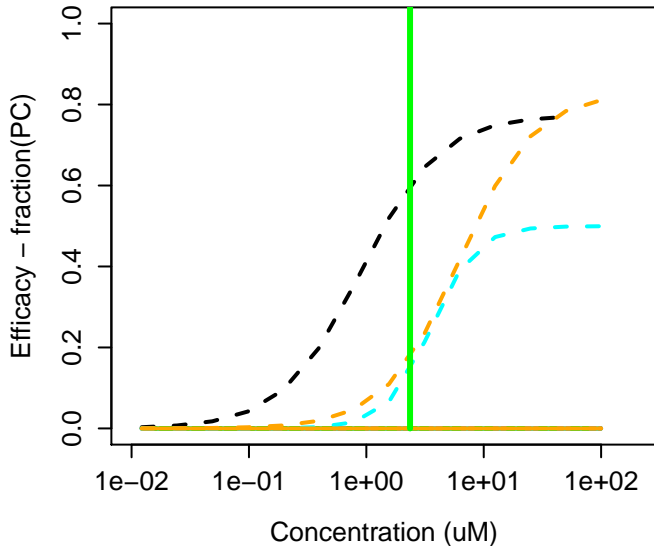

612-82-8 : 3,3'-Dimethylbenzidine dihydrochloric  
Agonist: 0.00023 Antagonist: 0.15

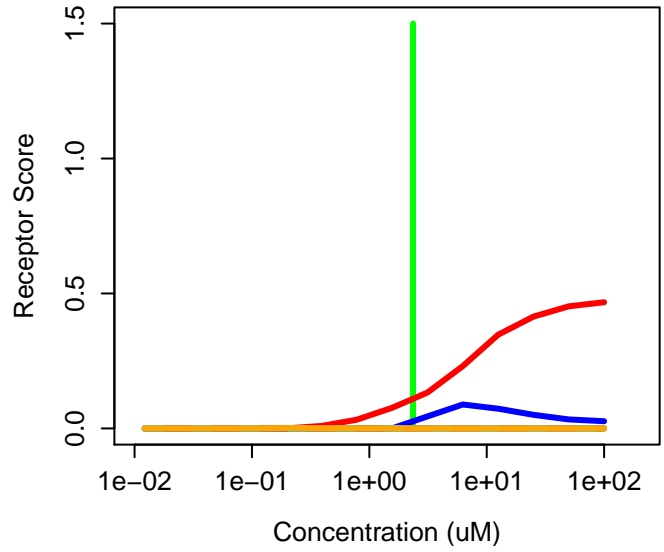

614-45-9 : tert-Butyl perbenzoate

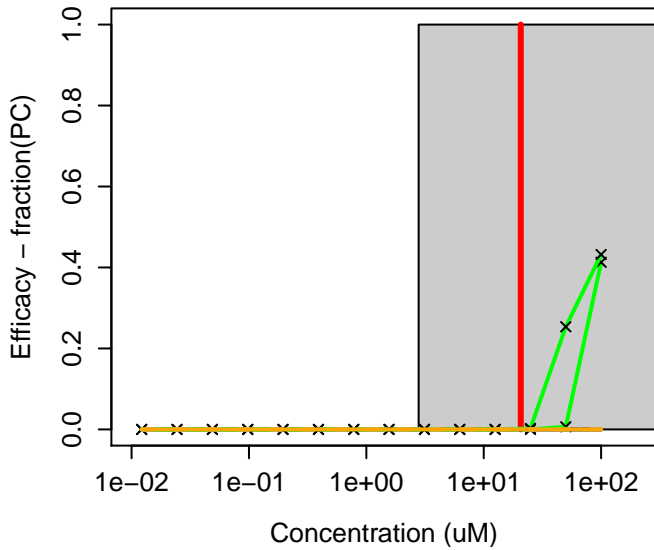

614-45-9 : tert-Butyl perbenzoate  
Agonist: 0 Antagonist: 0

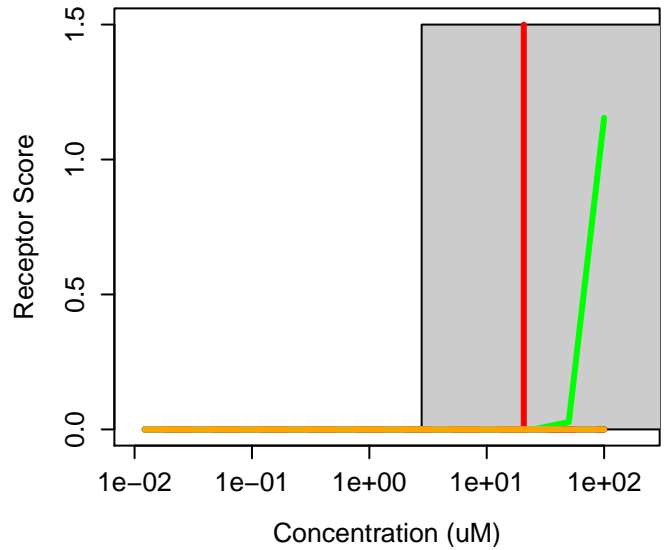

6149-03-7 : Sodium 4-octylbenzenesulfonate

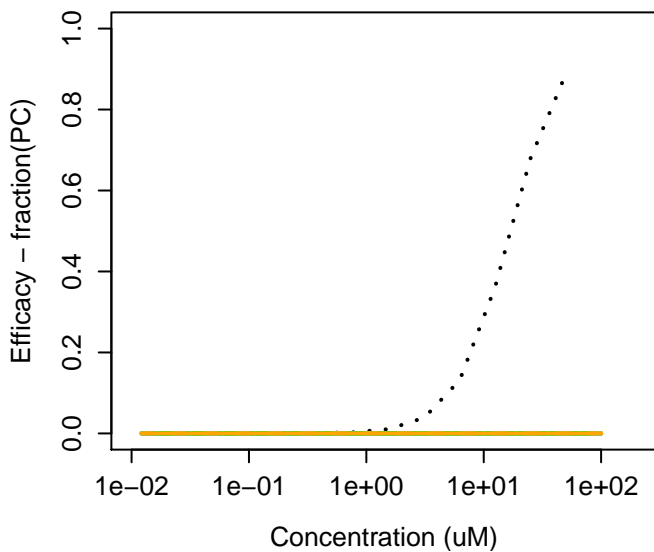

6149-03-7 : Sodium 4-octylbenzenesulfonate  
Agonist: 0 Antagonist: 4e-05

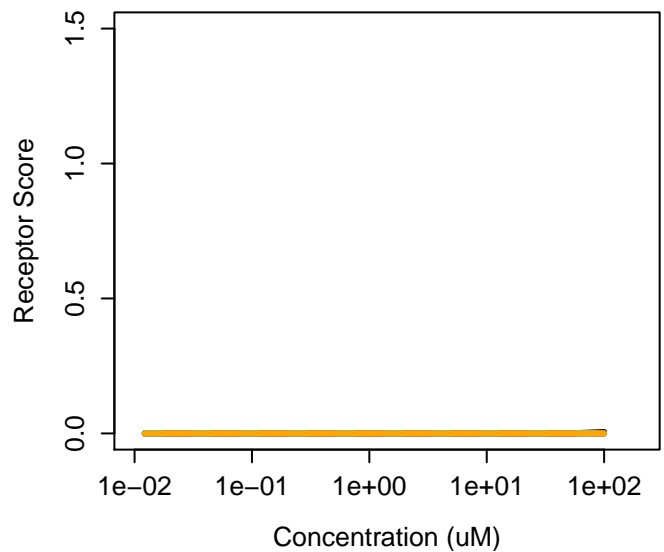

6152-33-6 : Sodium 2-phenylphenate tetrahydrat

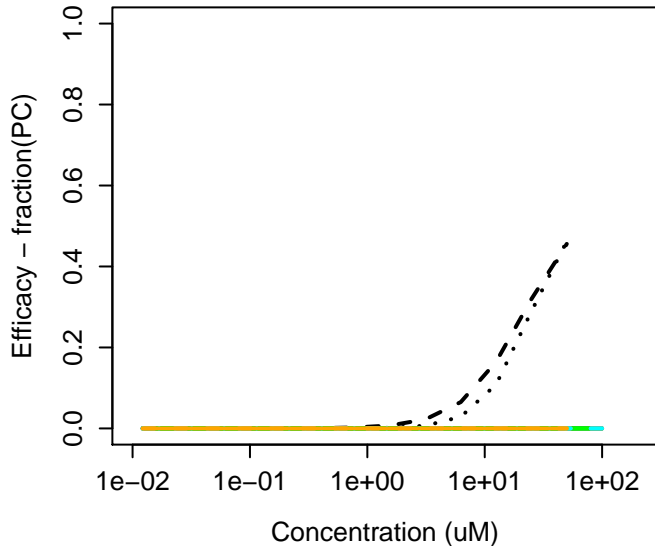

6152-33-6 : Sodium 2-phenylphenate tetrahydrat  
Agonist: 0 Antagonist: 0

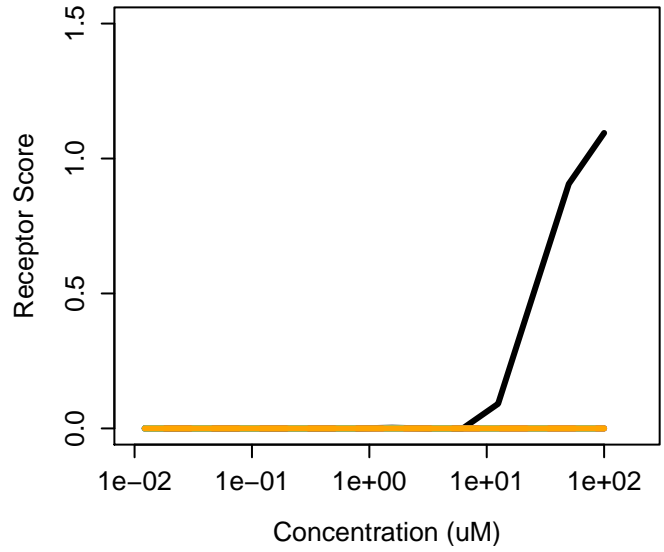

6153-64-6 : Oxytetracycline dihydrate

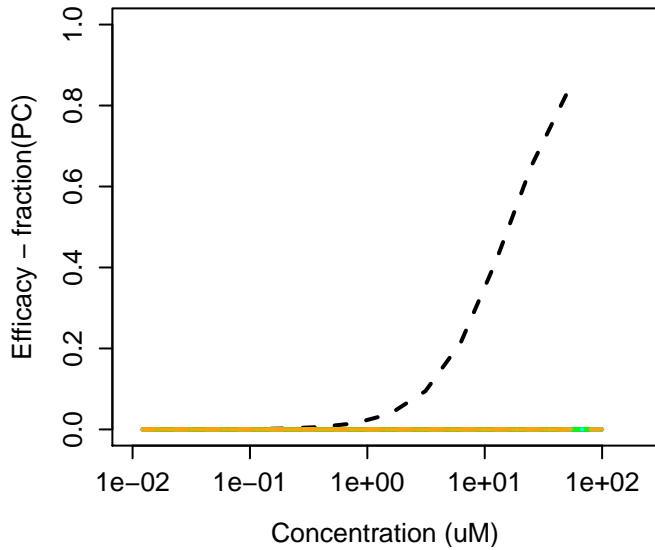

6153-64-6 : Oxytetracycline dihydrate  
Agonist: 0 Antagonist: 5.2e-05

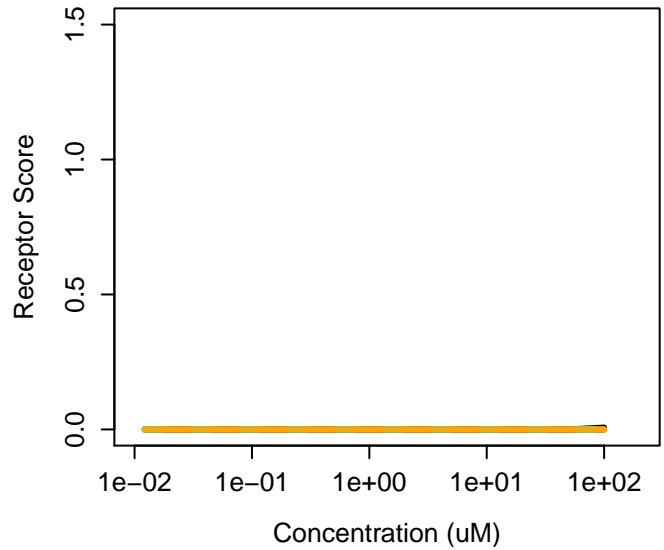

616-45-5 : 2-Pyrrolidinone

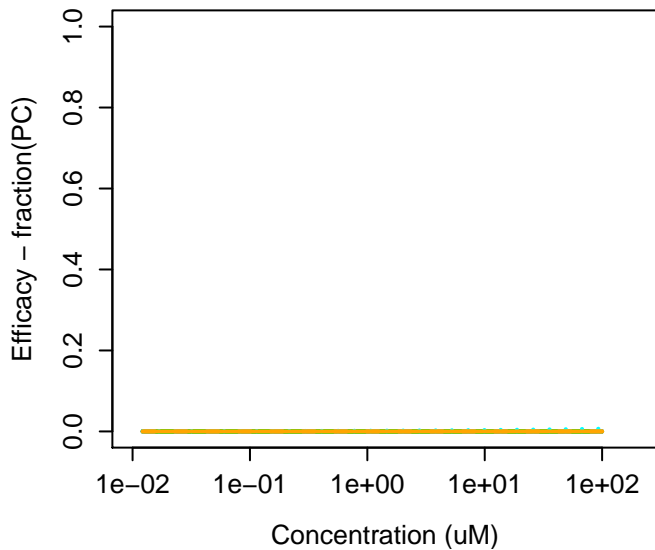

616-45-5 : 2-Pyrrolidinone  
Agonist: 0 Antagonist: 0

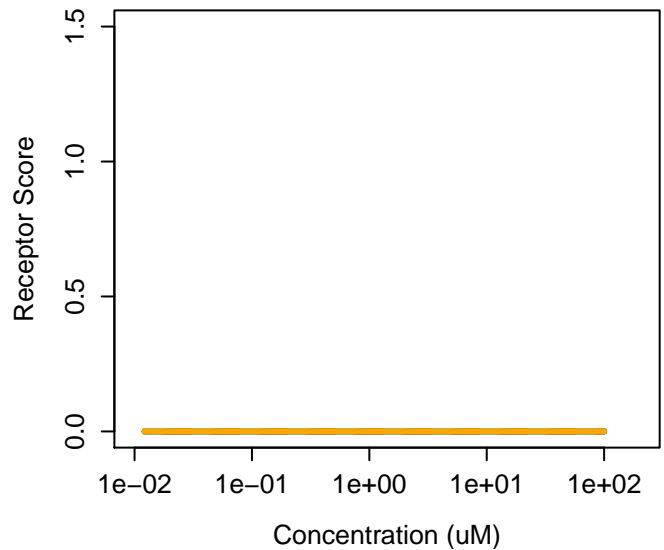

61-73-4 : Methylene blue

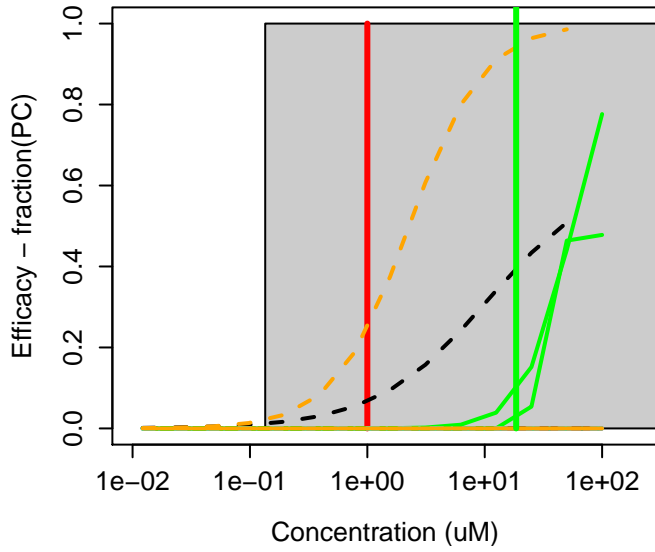

61-73-4 : Methylene blue  
Agonist: 0 Antagonist: 0.24

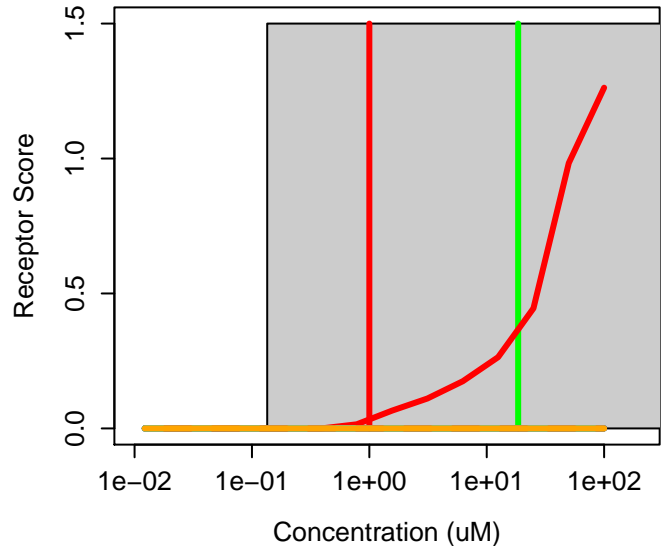

61791-12-6 : Cremophor EL

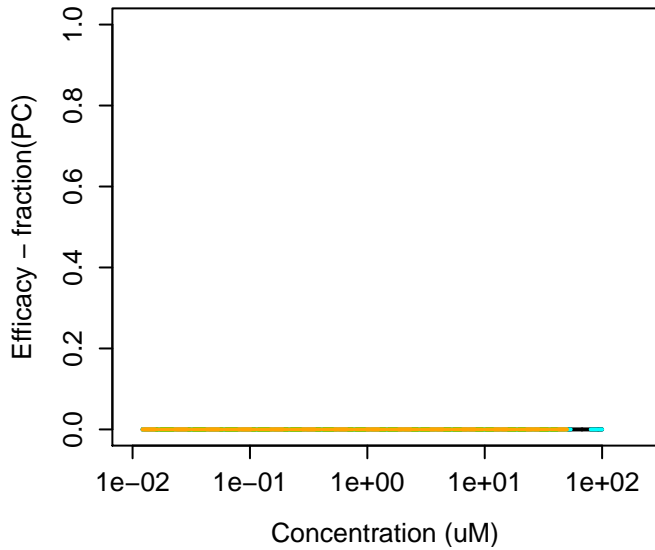

61791-12-6 : Cremophor EL  
Agonist: 0 Antagonist: 0



61-82-5 : Amitrole



61-82-5 : Amitrole  
Agonist: 0 Antagonist: 0



**618-45-1 : 3-Isopropylphenol**



**618-45-1 : 3-Isopropylphenol  
Agonist: 0 Antagonist: 0**



**6190-65-4 : Deethylatrazine**



**6190-65-4 : Deethylatrazine  
Agonist: 0 Antagonist: 0**



**620-17-7 : 3-Ethylphenol**



**620-17-7 : 3-Ethylphenol  
Agonist: 0 Antagonist: 0**



**621-64-7 : N-Nitrosodipropylamine**



**621-64-7 : N-Nitrosodipropylamine**  
Agonist: 0 Antagonist: 0



**62-23-7 : 4-Nitrobenzoic acid**



**62-23-7 : 4-Nitrobenzoic acid**  
Agonist: 0 Antagonist: 0



**622-97-9 : 4-Methylstyrene**

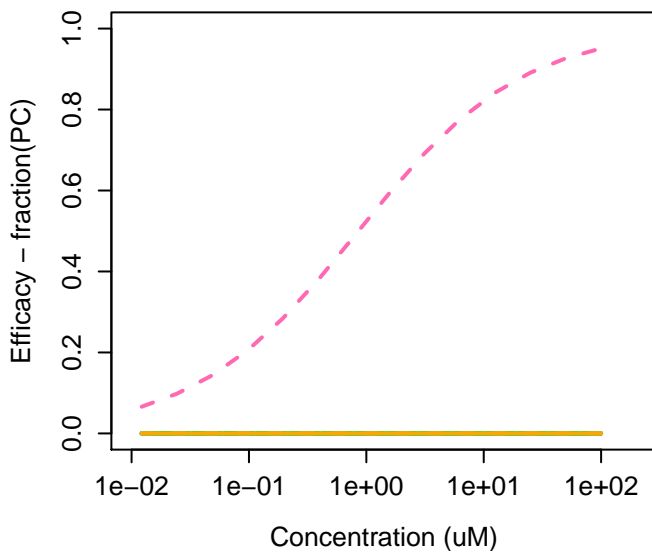

**622-97-9 : 4-Methylstyrene**  
Agonist: 0.00015 Antagonist: 0

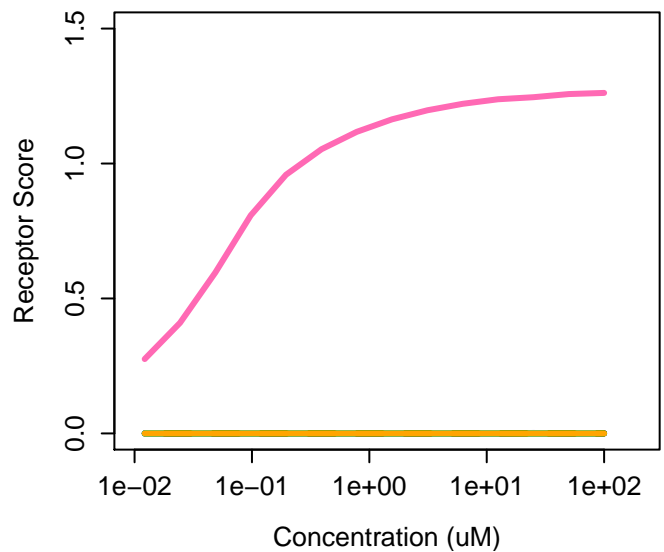

62-38-4 : Phenylmercuric acetate

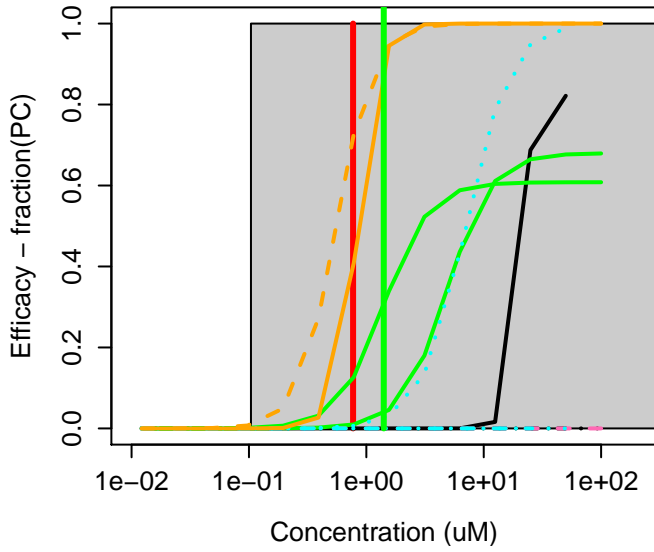

62-38-4 : Phenylmercuric acetate  
Agonist: 0 Antagonist: 0.51

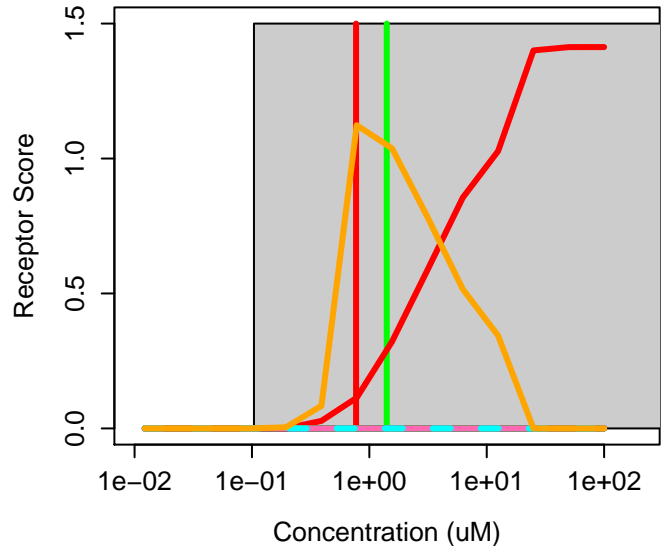

625114-41-2 : Piragliatin

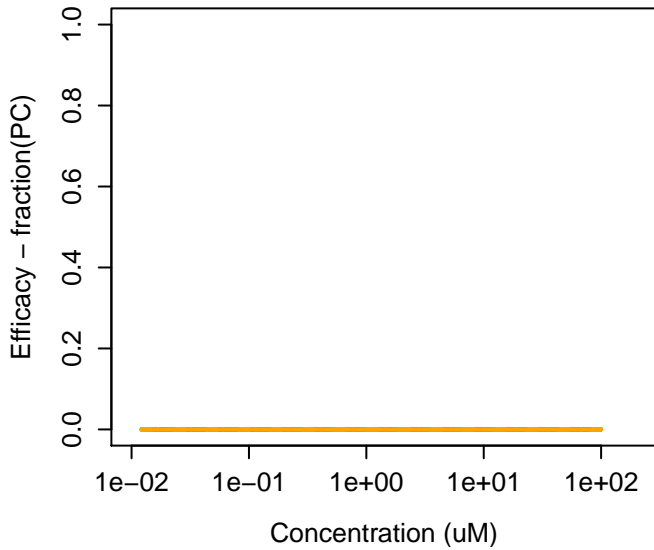

625114-41-2 : Piragliatin  
Agonist: 0 Antagonist: 0



625-55-8 : Isopropyl formate

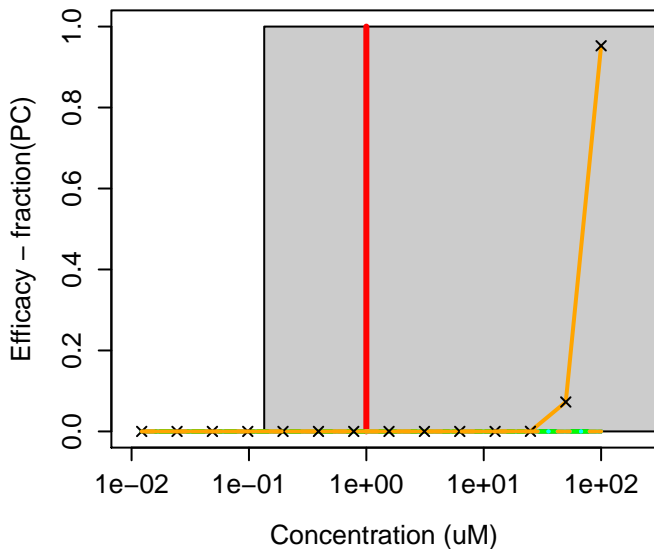

625-55-8 : Isopropyl formate  
Agonist: 0 Antagonist: 0

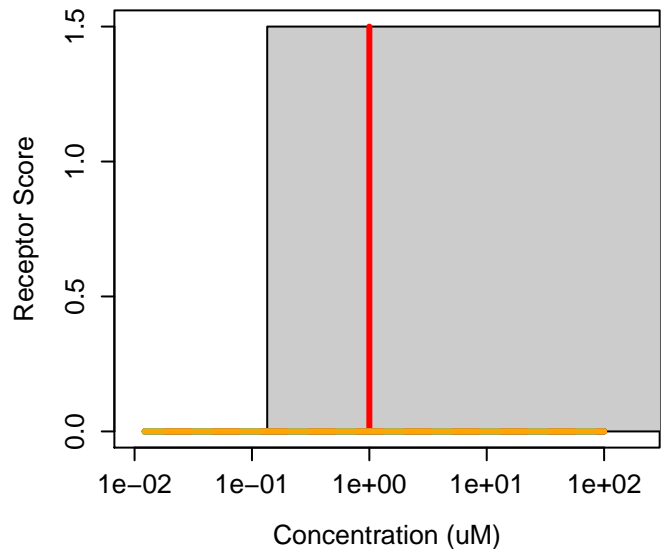

**62-56-6 : Thiourea**



**62-56-6 : Thiourea  
Agonist: 0 Antagonist: 0**



**6259-76-3 : Hexyl salicylate**



**6259-76-3 : Hexyl salicylate  
Agonist: 0 Antagonist: 0**



**626-43-7 : 3,5-Dichloroaniline**



**626-43-7 : 3,5-Dichloroaniline  
Agonist: 0 Antagonist: 0**





**627-18-9 : 3-Bromo-1-propanol**



**627-18-9 : 3-Bromo-1-propanol**  
**Agonist: 0 Antagonist: 0**



**62-73-7 : Dichlorvos**

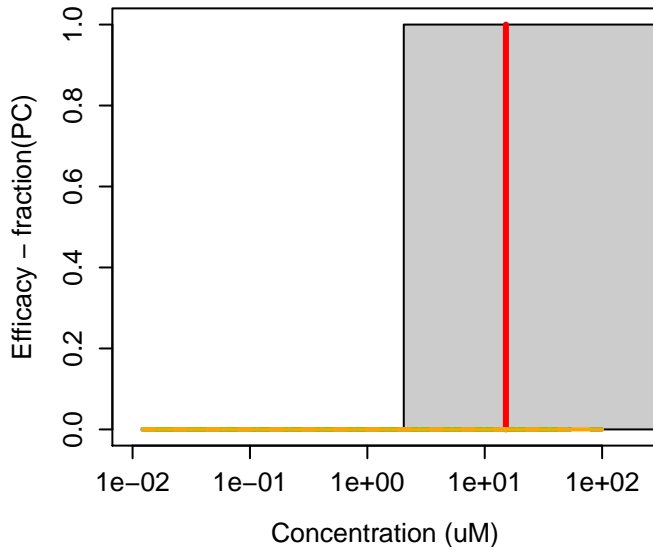

**62-73-7 : Dichlorvos**  
**Agonist: 0 Antagonist: 0**

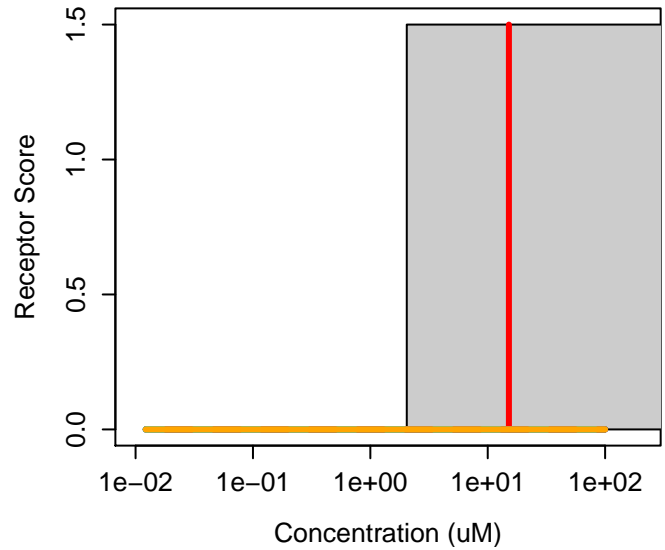

**62-74-8 : Sodium fluoroacetate**



**62-74-8 : Sodium fluoroacetate**  
**Agonist: 0 Antagonist: 0**



**62-75-9 : N-Nitrosodimethylamine**



**62-75-9 : N-Nitrosodimethylamine  
Agonist: 0 Antagonist: 0**



**627-93-0 : Dimethyl adipate**



**627-93-0 : Dimethyl adipate  
Agonist: 0 Antagonist: 0**



**6285-05-8 : Ethyl 4-chlorophenyl ketone**



**6285-05-8 : Ethyl 4-chlorophenyl ketone  
Agonist: 0 Antagonist: 0**



628-63-7 : Pentyl acetate

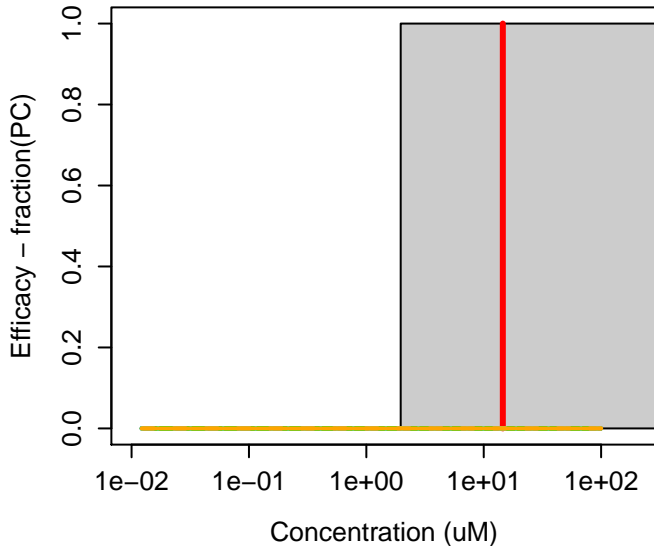

628-63-7 : Pentyl acetate  
Agonist: 0 Antagonist: 0

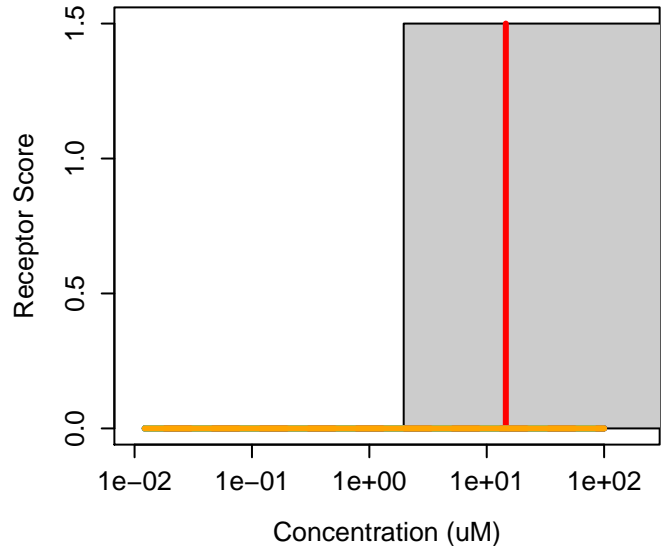

62924-70-3 : Flumetralin

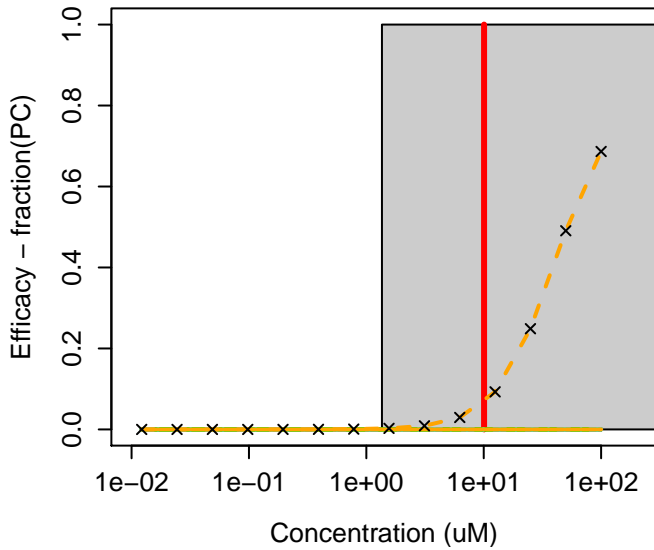

62924-70-3 : Flumetralin  
Agonist: 0 Antagonist: 0

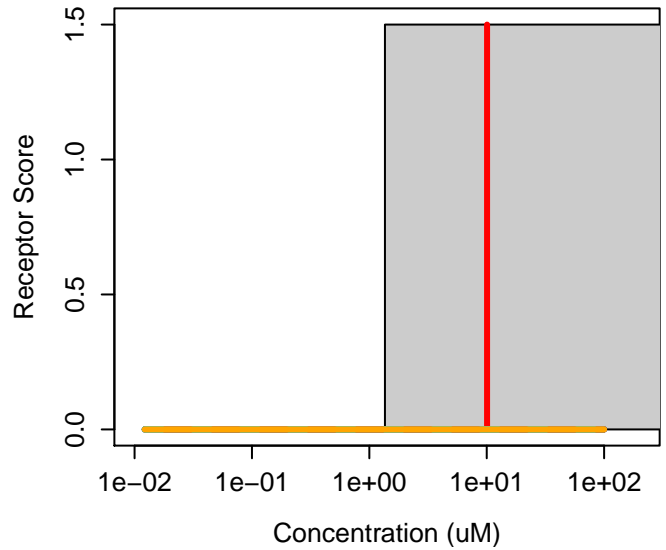

629-62-9 : Pentadecane



629-62-9 : Pentadecane  
Agonist: 0 Antagonist: 0



629-76-5 : 1-Pentadecanol

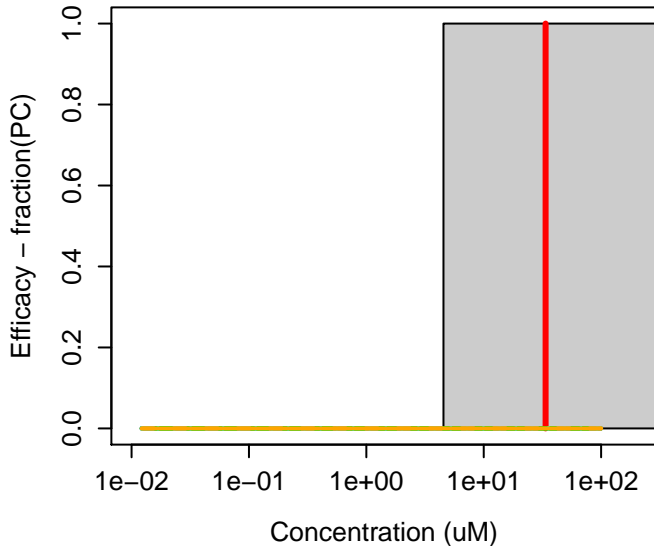

629-76-5 : 1-Pentadecanol  
Agonist: 0 Antagonist: 0

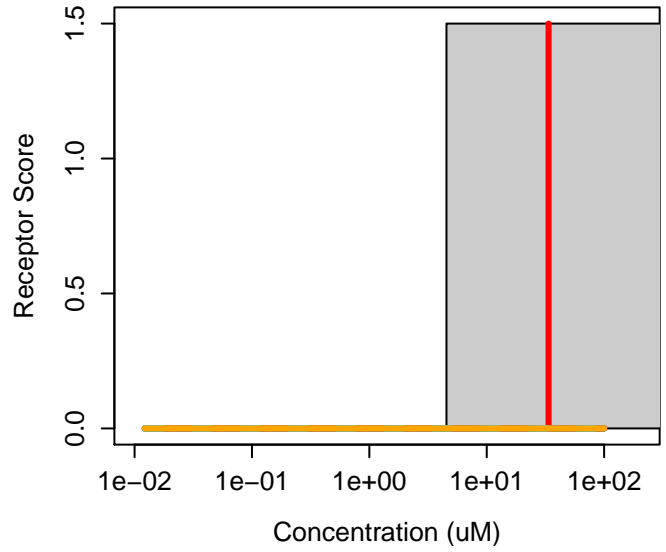

630-56-8 : Hydroxyprogesterone caproate

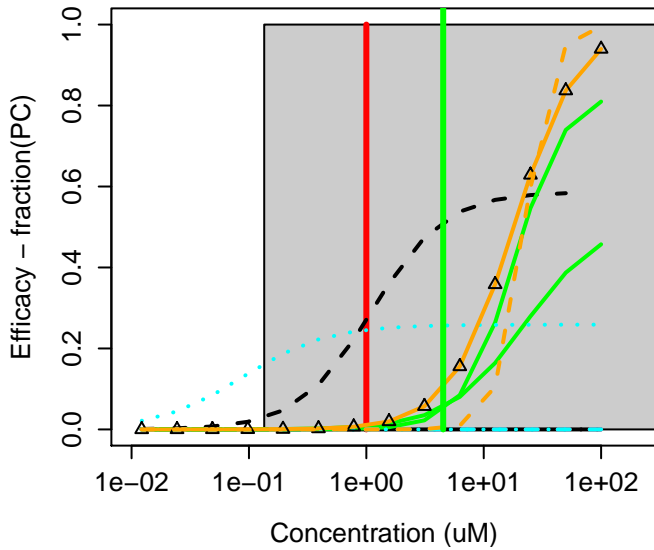

630-56-8 : Hydroxyprogesterone caproate  
Agonist: 0.033 Antagonist: 0.33

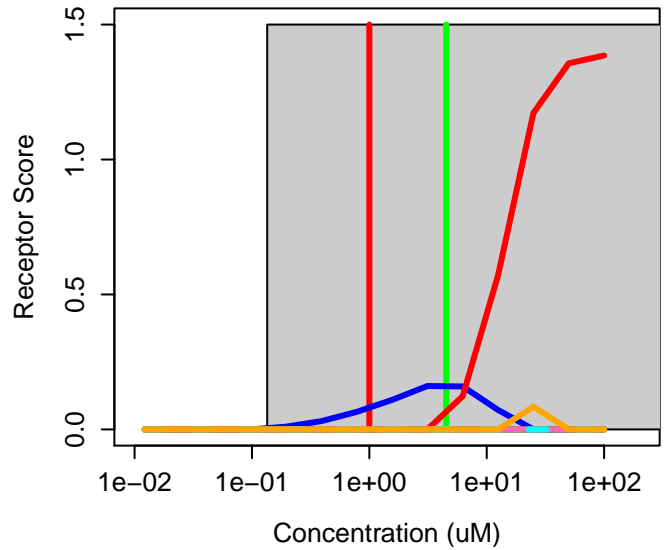

63-05-8 : 4-Androstene-3,17-dione

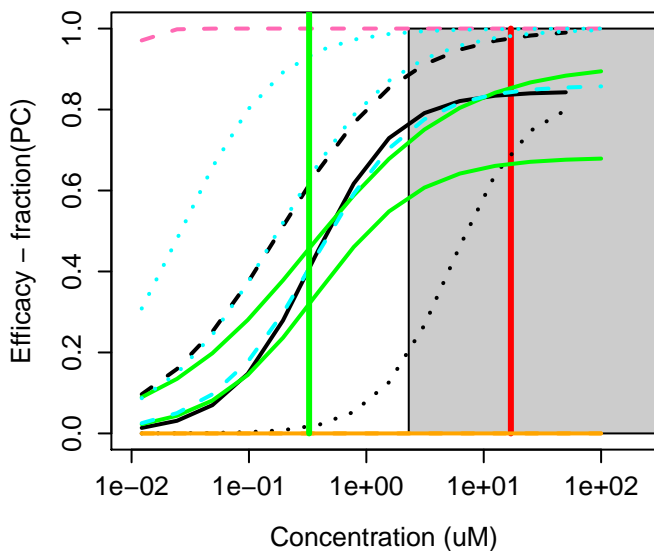

63-05-8 : 4-Androstene-3,17-dione  
Agonist: 1.3 Antagonist: 0

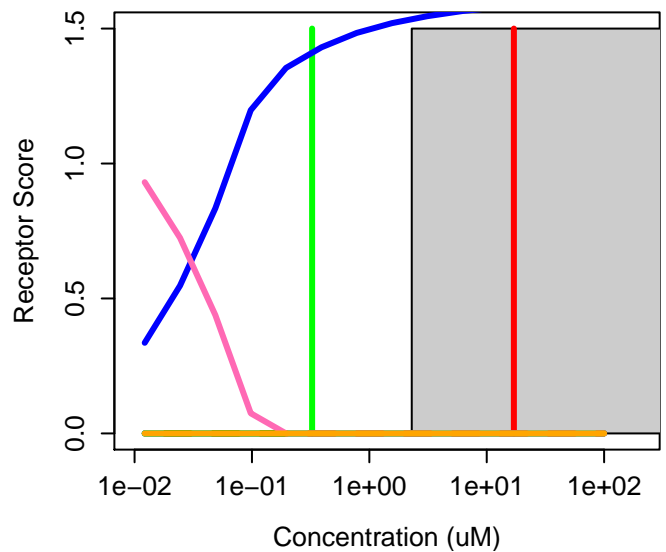

6317-18-6 : Methylene bis(thiocyanate)

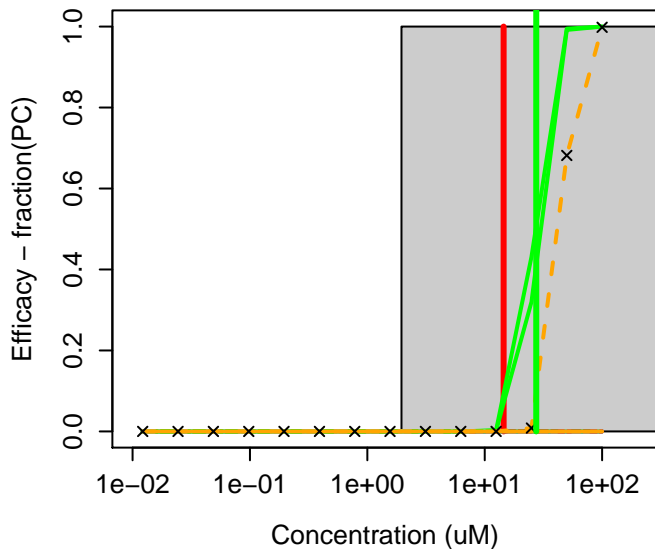

6317-18-6 : Methylene bis(thiocyanate)  
Agonist: 0 Antagonist: 0.1

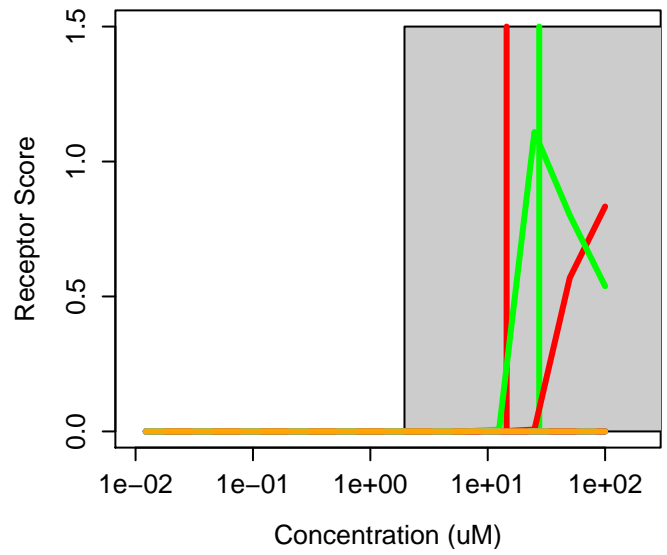

63-25-2 : Carbaryl

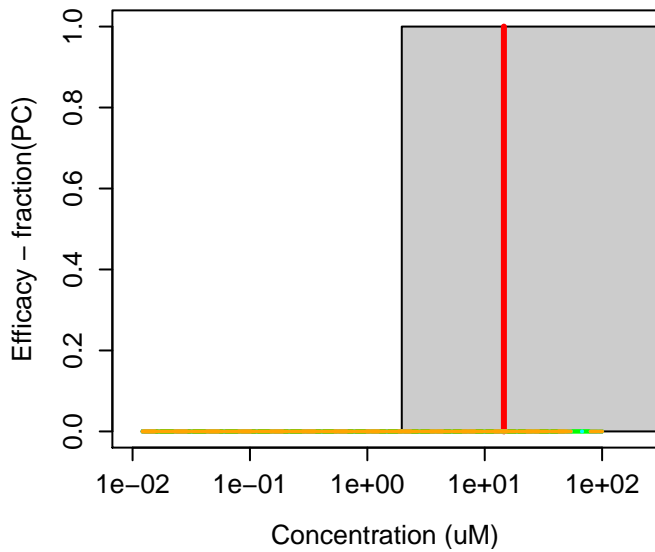

63-25-2 : Carbaryl  
Agonist: 0 Antagonist: 0

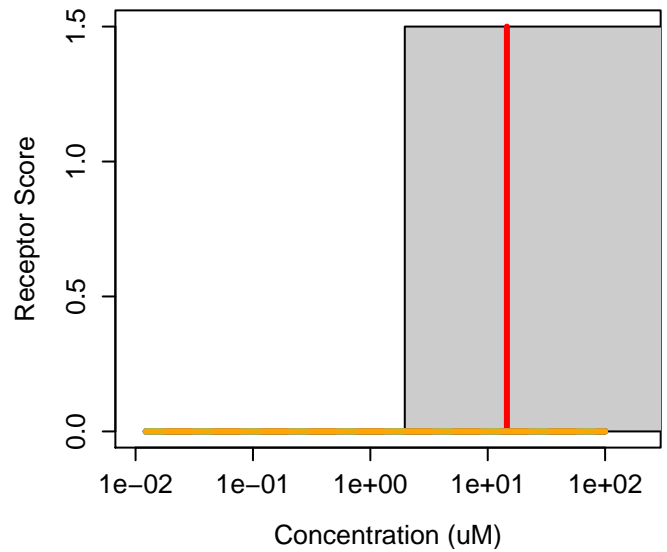

633-96-5 : C.I. Acid Orange 7

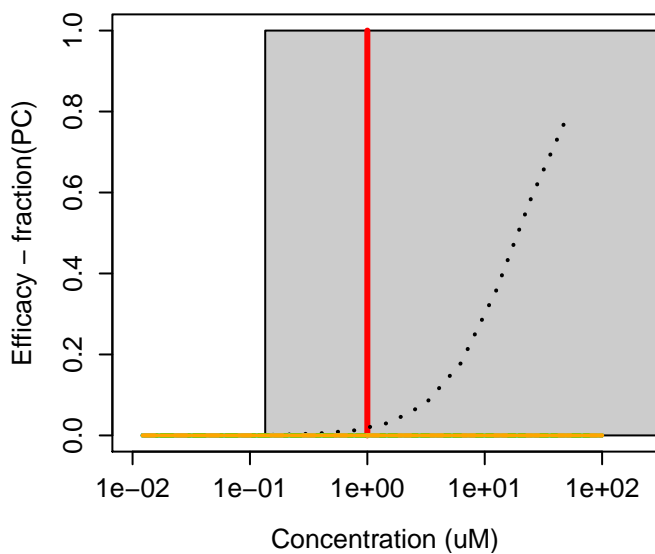

633-96-5 : C.I. Acid Orange 7  
Agonist: 0 Antagonist: 4.3e-05

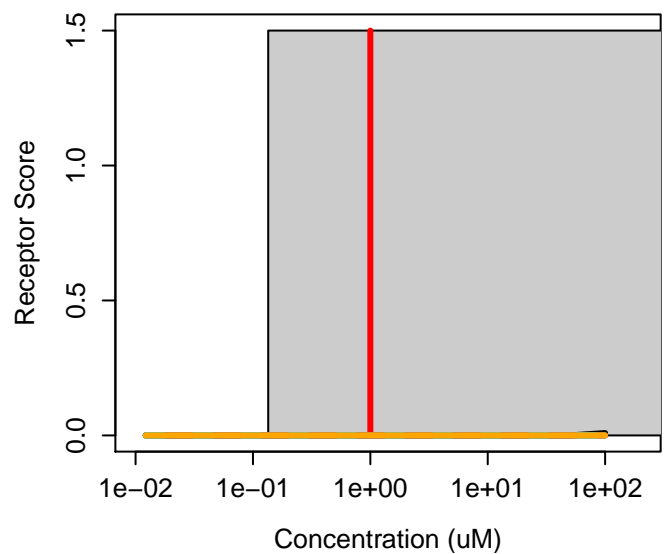

63-42-3 : Lactose

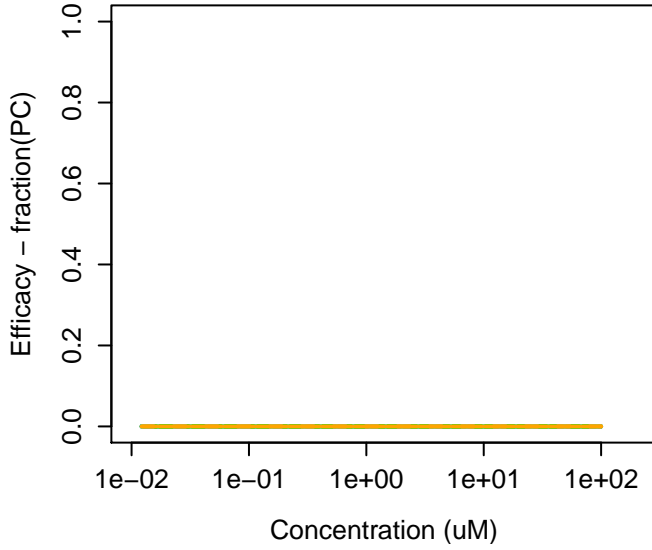

63-42-3 : Lactose  
Agonist: 0 Antagonist: 0

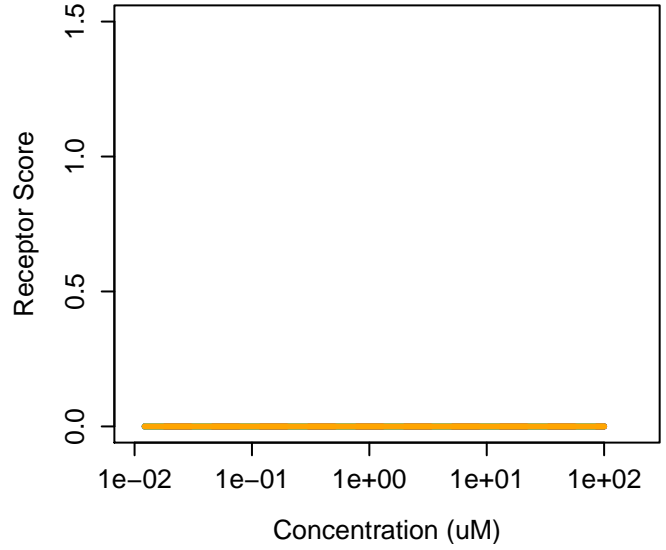

6344-67-8 : 3-Hydroxyfluorene

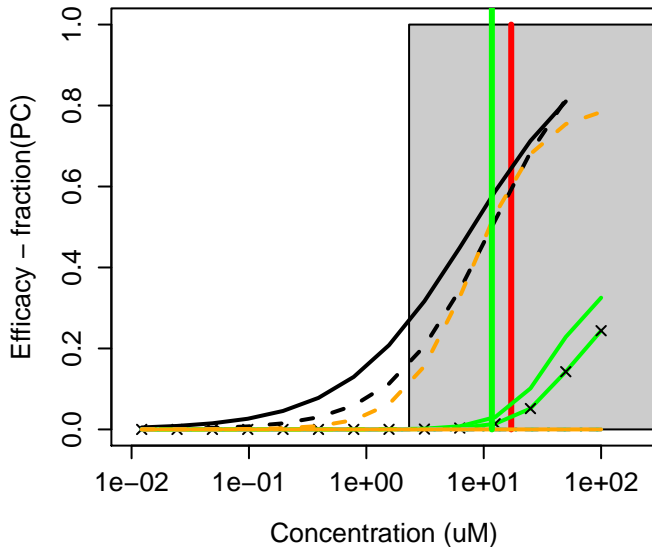

6344-67-8 : 3-Hydroxyfluorene  
Agonist: 0 Antagonist: 0.32

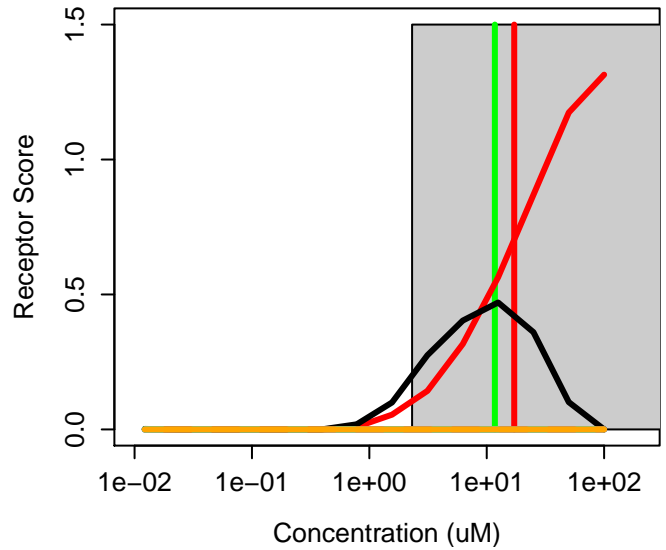

449-41-2 : Benzyl-C8-18-alkyldimethylammonium c  
449-41-2 : Benzyl-C8-18-alkyldimethylammonium c  
Agonist: 0.011 Antagonist: 0.073

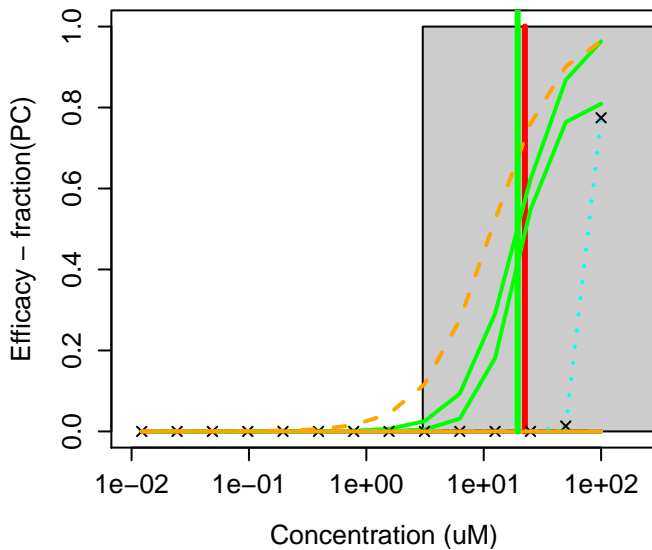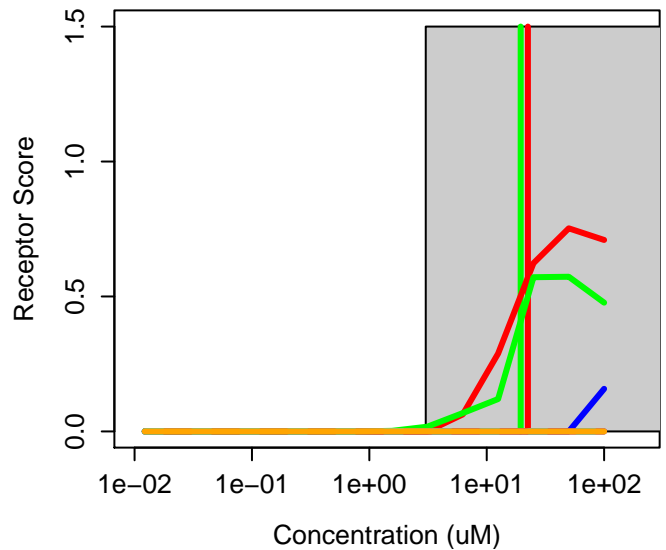

6359-82-6 : Acid Yellow 11

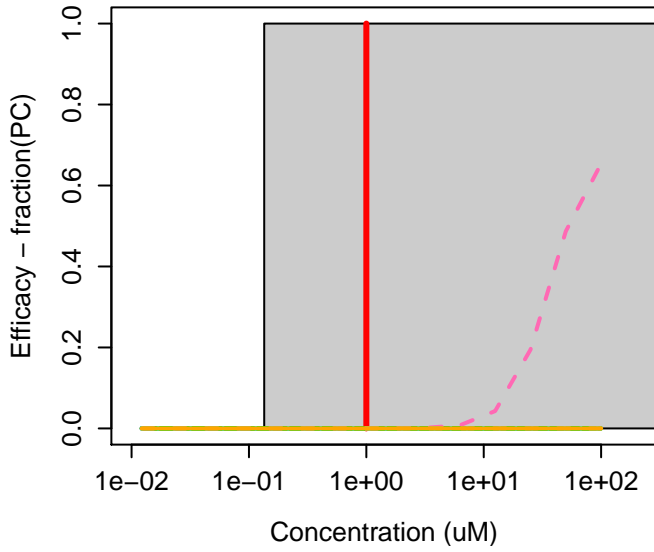

6359-82-6 : Acid Yellow 11  
Agonist: 0 Antagonist: 0

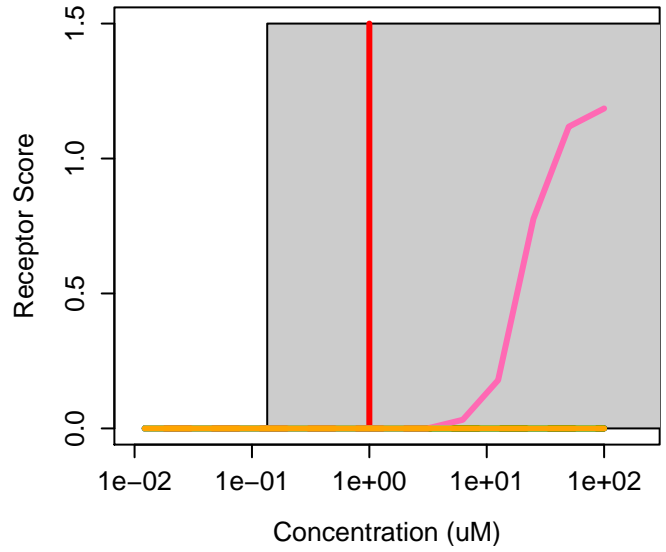

6359-90-6 : C.I. Acid Yellow 34, monosodium sal



6359-90-6 : C.I. Acid Yellow 34, monosodium sal  
Agonist: 0 Antagonist: 0



6359-98-4 : C.I. Acid Yellow 17, disodium salt

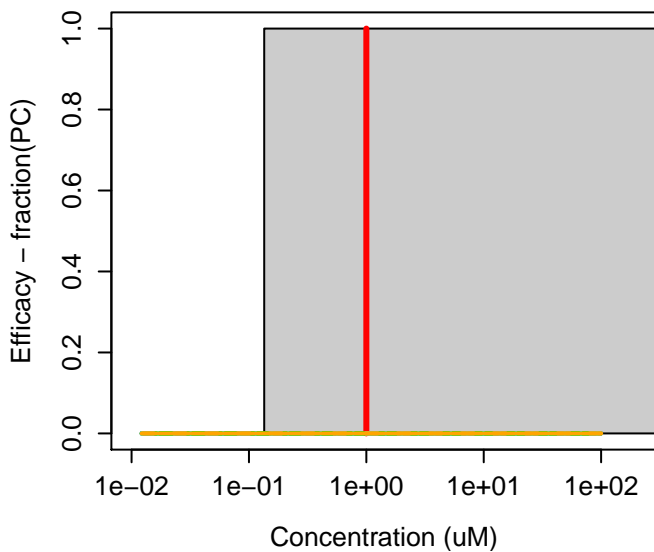

6359-98-4 : C.I. Acid Yellow 17, disodium salt  
Agonist: 0 Antagonist: 0

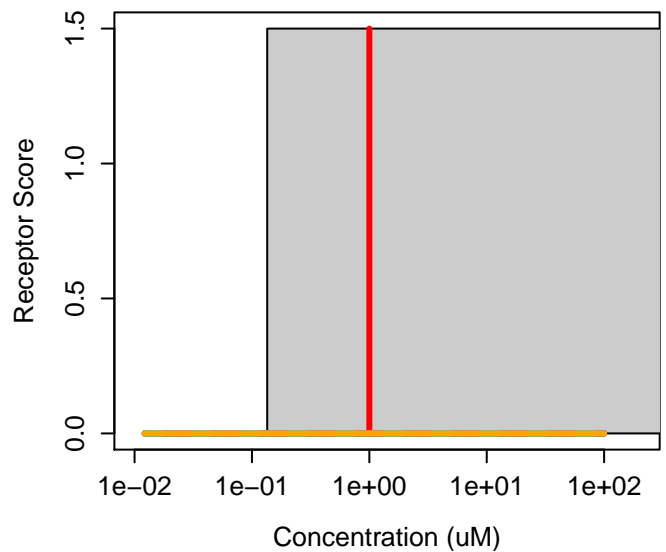

63612-50-0 : Nilutamide

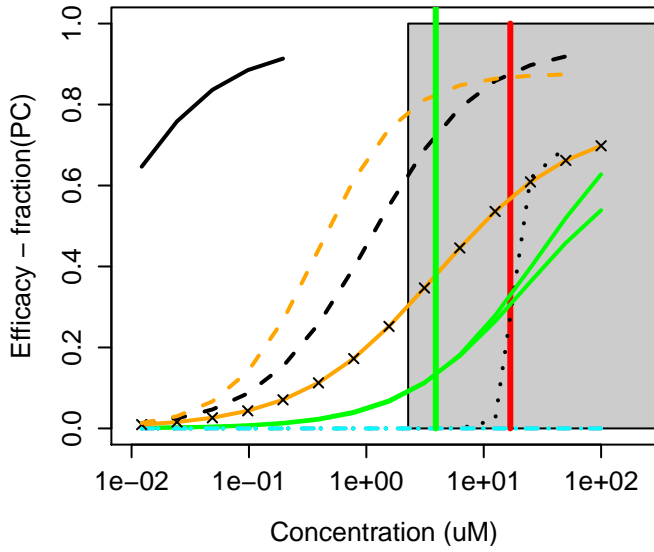

63612-50-0 : Nilutamide  
Agonist: 0 Antagonist: 0.85

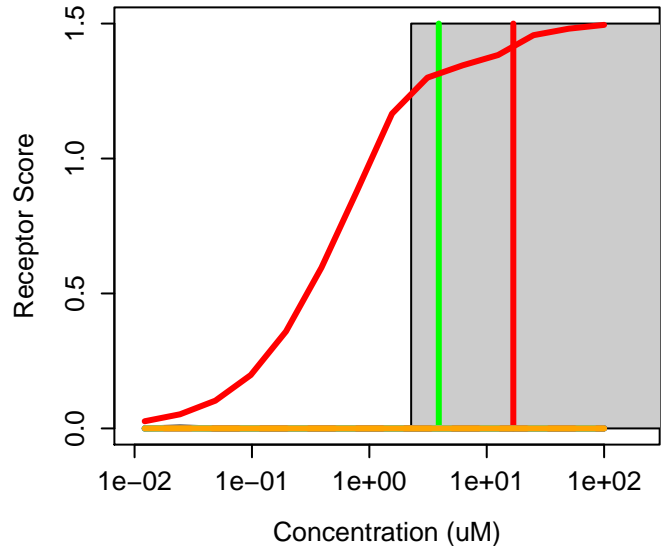

636-21-5 : 2-Methylaniline hydrochloride



636-21-5 : 2-Methylaniline hydrochloride  
Agonist: 0 Antagonist: 0



637-07-0 : Clofibrate

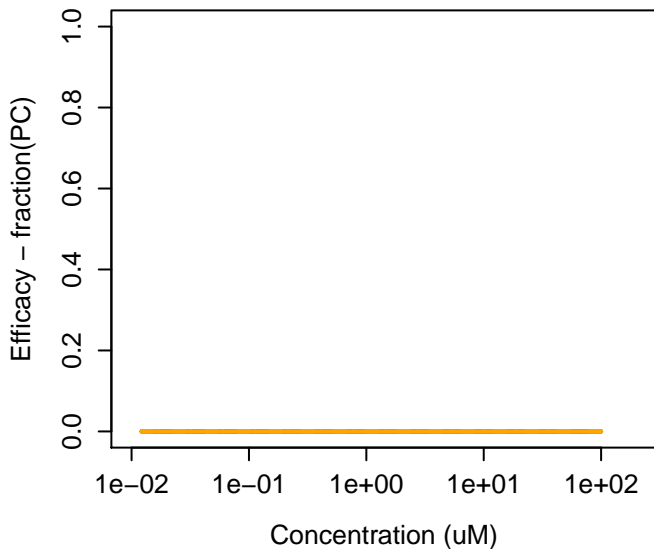

637-07-0 : Clofibrate  
Agonist: 0 Antagonist: 0





6381-77-7 : Sodium erythorbate (1:1)



6381-77-7 : Sodium erythorbate (1:1)  
Agonist: 0 Antagonist: 0



64-10-8 : 1-Phenylurea



64-10-8 : 1-Phenylurea  
Agonist: 0 Antagonist: 0



64-19-7 : Acetic acid

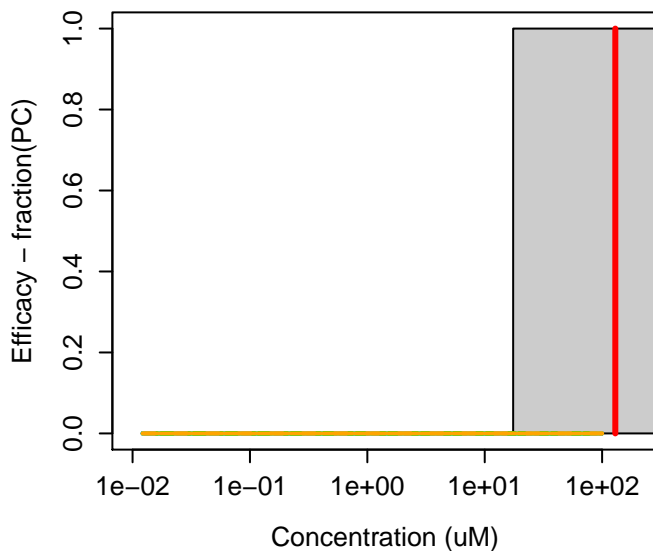

64-19-7 : Acetic acid  
Agonist: 0 Antagonist: 0

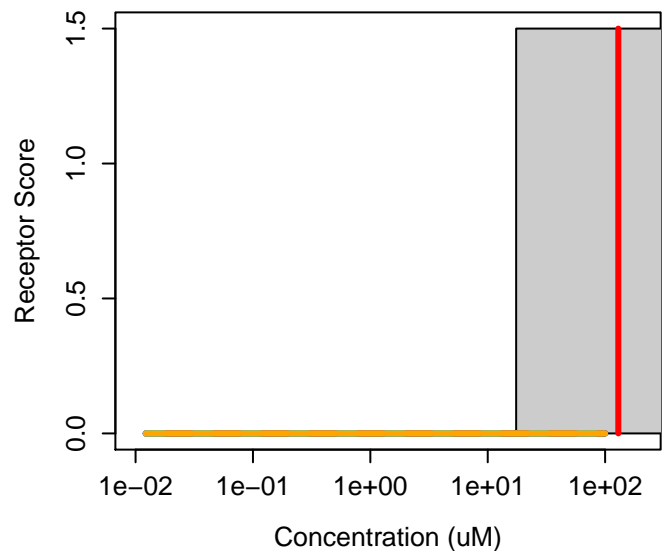

6422-86-2 : Bis(2-ethylhexyl) terephthalate

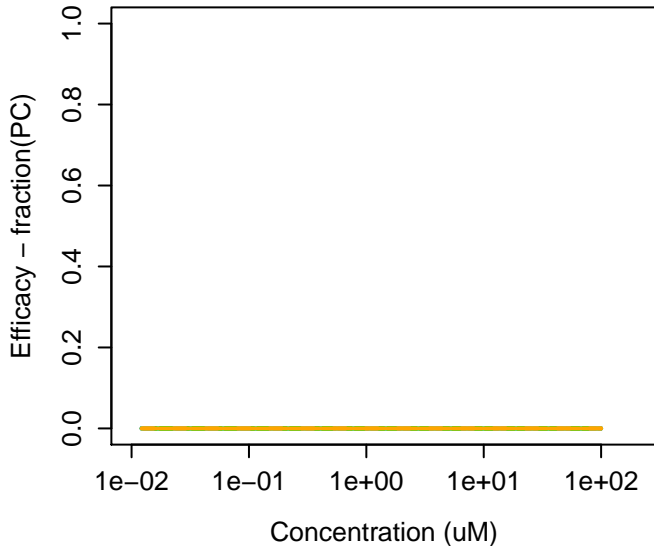

6422-86-2 : Bis(2-ethylhexyl) terephthalate  
Agonist: 0 Antagonist: 0

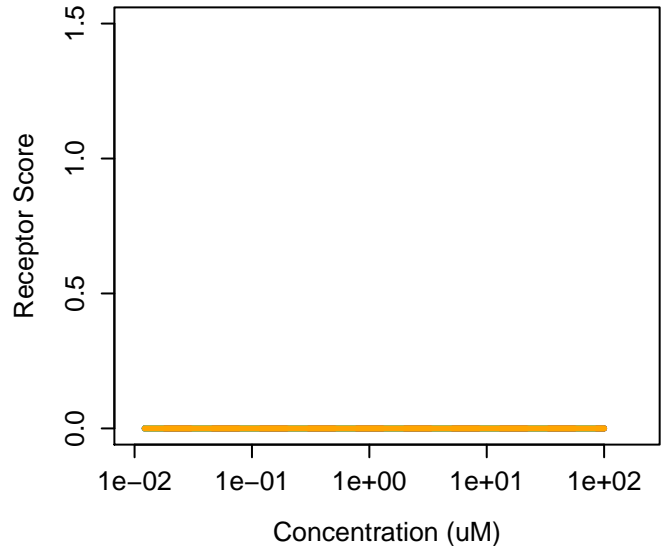

64359-81-5 : 4,5-Dichloro-2-octyl-3(2H)-isothiazolo[5,4-b]pyridine  
Agonist: 0.0098 Antagonist: 0.094

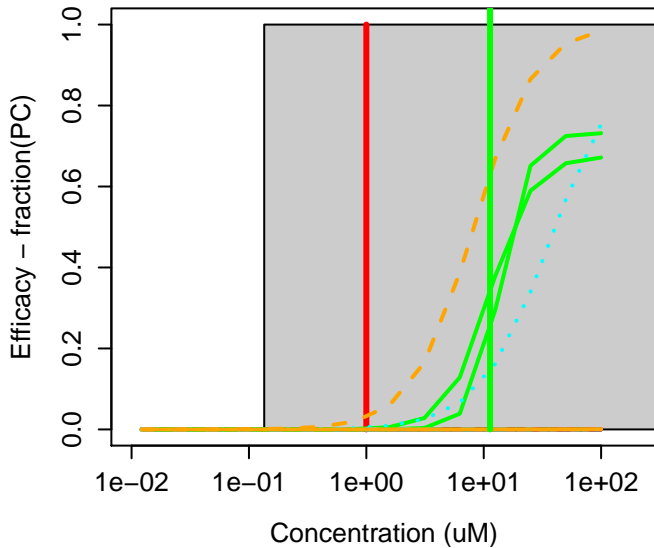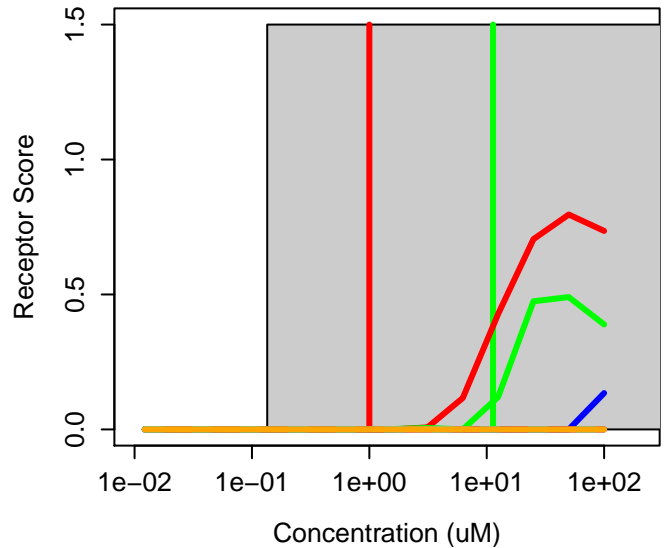

643-79-8 : 1,2-Benzenedicarboxaldehyde

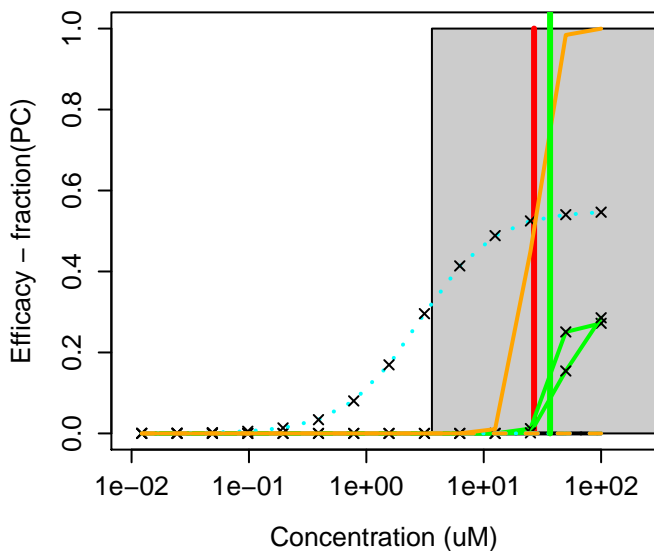

643-79-8 : 1,2-Benzenedicarboxaldehyde  
Agonist: 0.00031 Antagonist: 0.048

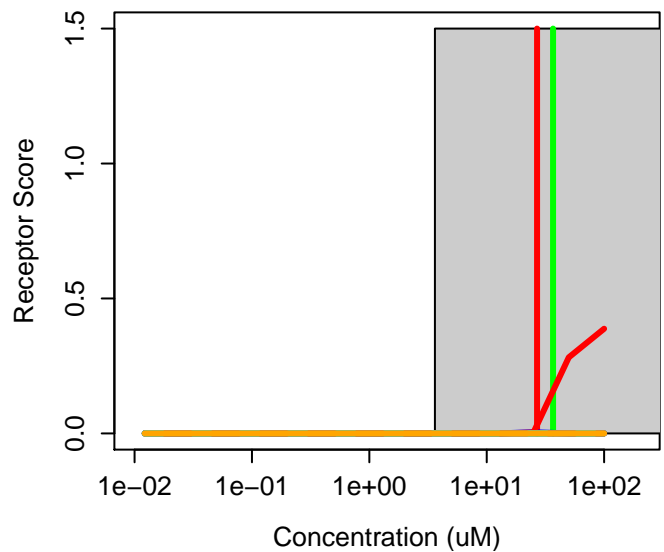

644-97-3 : Phenyl phosphorus dichloride



644-97-3 : Phenyl phosphorus dichloride  
Agonist: 0 Antagonist: 0



645-56-7 : 4-Propylphenol



645-56-7 : 4-Propylphenol  
Agonist: 0 Antagonist: 0



645-62-5 : 2-Ethyl-2-hexenal

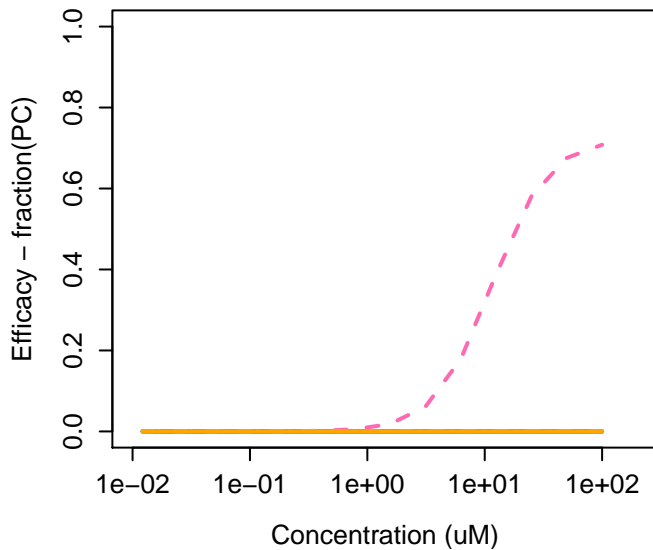

645-62-5 : 2-Ethyl-2-hexenal  
Agonist: 0 Antagonist: 0

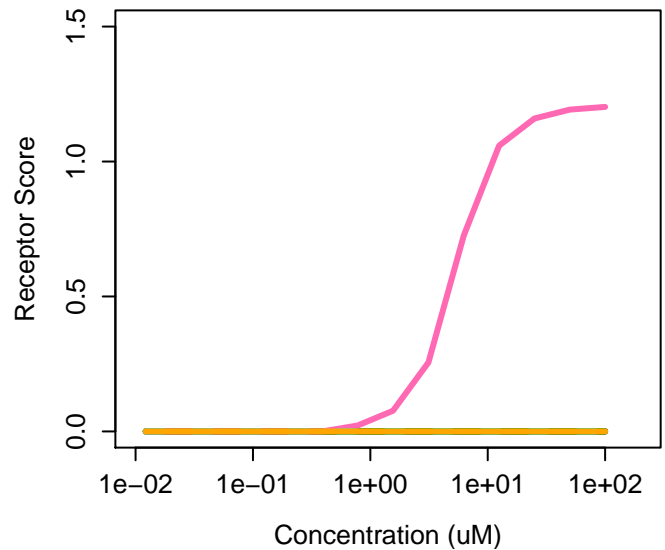

6459-94-5 : C.I. Acid Red 114

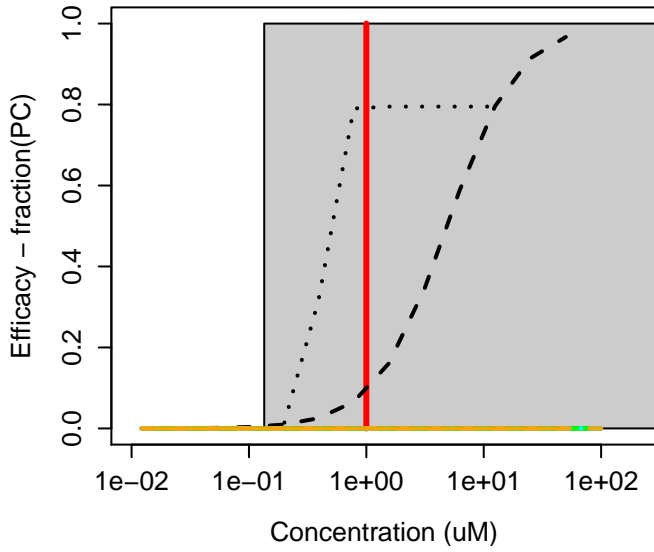

6459-94-5 : C.I. Acid Red 114  
Agonist: 1.8e-05 Antagonist: 0.0011

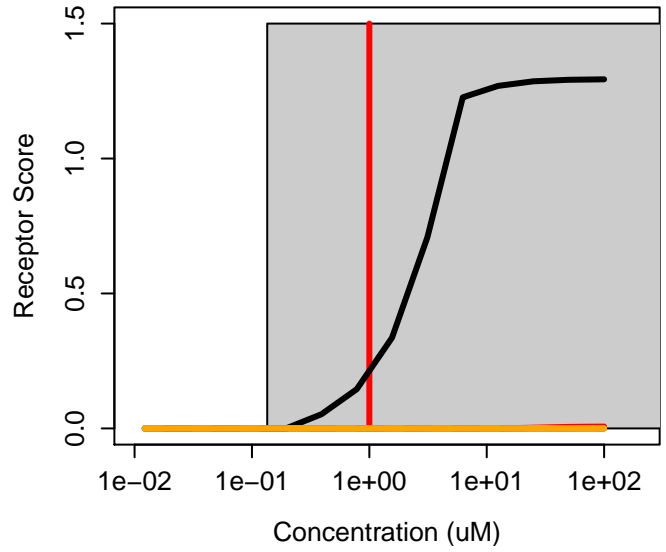

64-67-5 : Diethyl sulfate



64-67-5 : Diethyl sulfate  
Agonist: 0 Antagonist: 0



64700-56-7 : Triclopyr-butotyl



64700-56-7 : Triclopyr-butotyl  
Agonist: 0 Antagonist: 0



647-42-7 : 3,3,4,4,5,5,6,6,7,7,8,8,8-Tridecafluorooctan  
Agonist: 0 Antagonist: 0



6485-40-1 : R-(-)-Carvone

6485-40-1 : R-(-)-Carvone  
Agonist: 0 Antagonist: 0



64-86-8 : Colchicine

64-86-8 : Colchicine  
Agonist: 0 Antagonist: 0

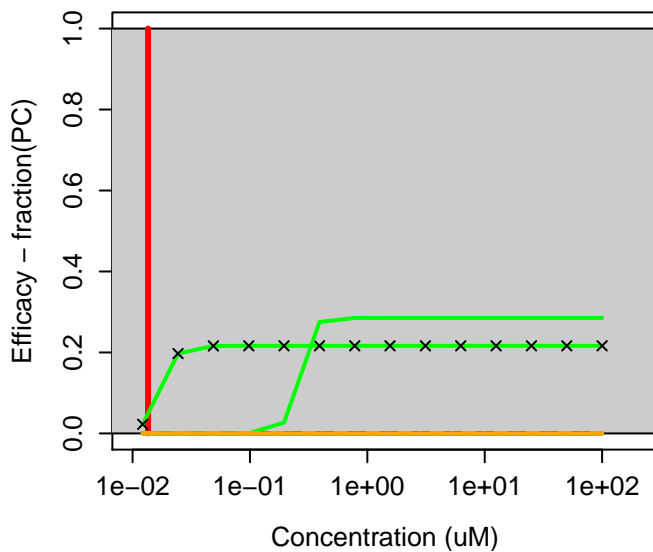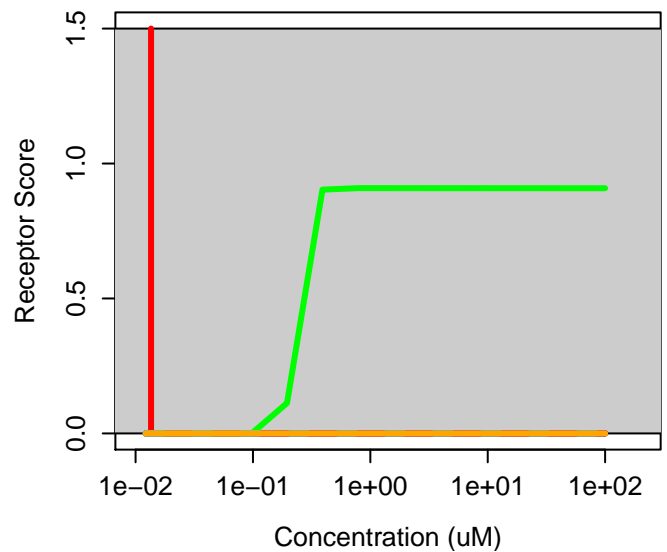

648917-13-9 : AVE2865

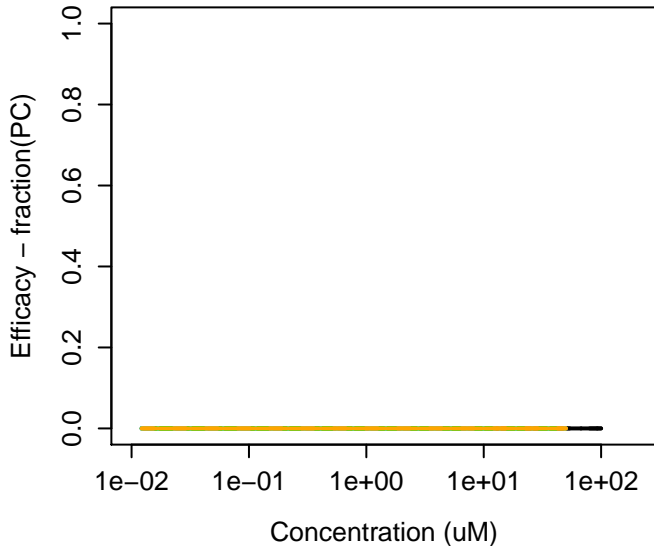

648917-13-9 : AVE2865  
Agonist: 0 Antagonist: 0



650-51-1 : Sodium trichloroacetate

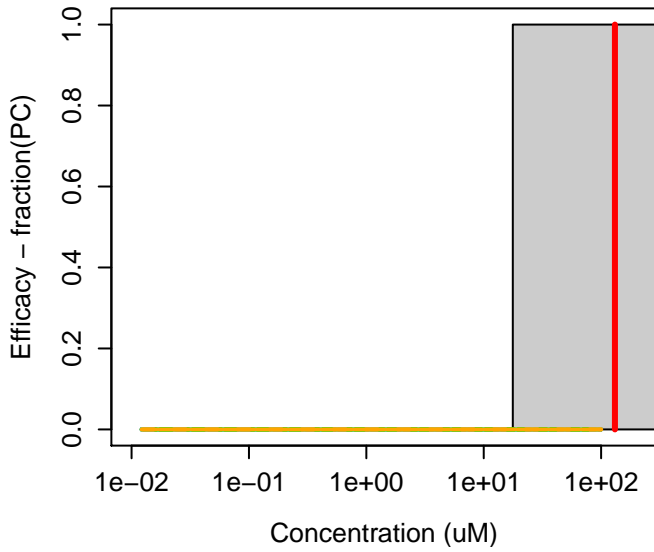

650-51-1 : Sodium trichloroacetate  
Agonist: 0 Antagonist: 0

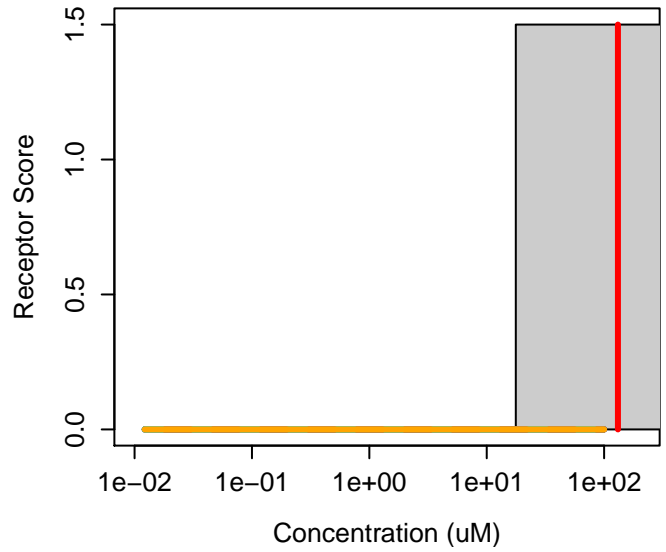

65-23-6 : Pyridoxine



65-23-6 : Pyridoxine  
Agonist: 0 Antagonist: 0



65277-42-1 : Ketoconazole

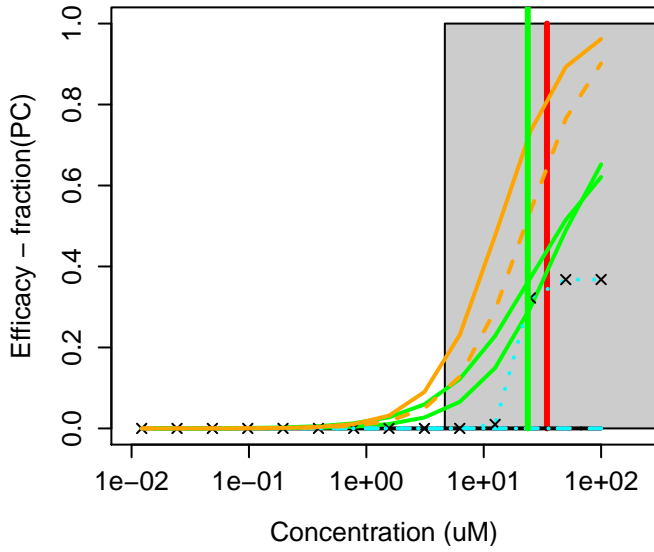

65277-42-1 : Ketoconazole  
Agonist: 0 Antagonist: 0.2

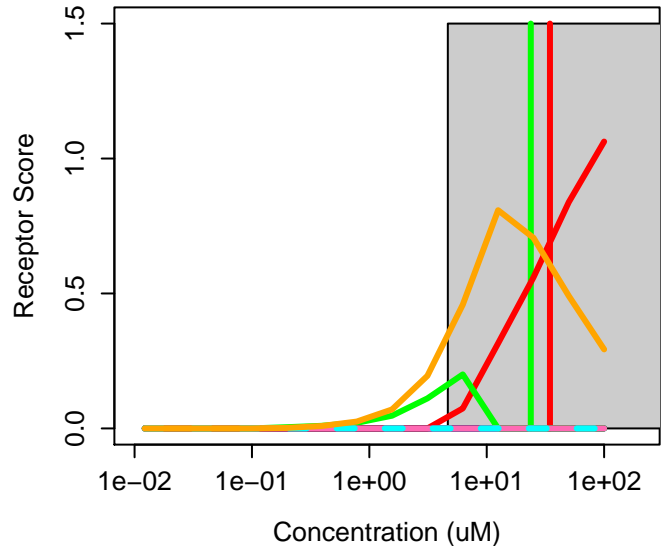

654055-01-3 : Morin hydrate

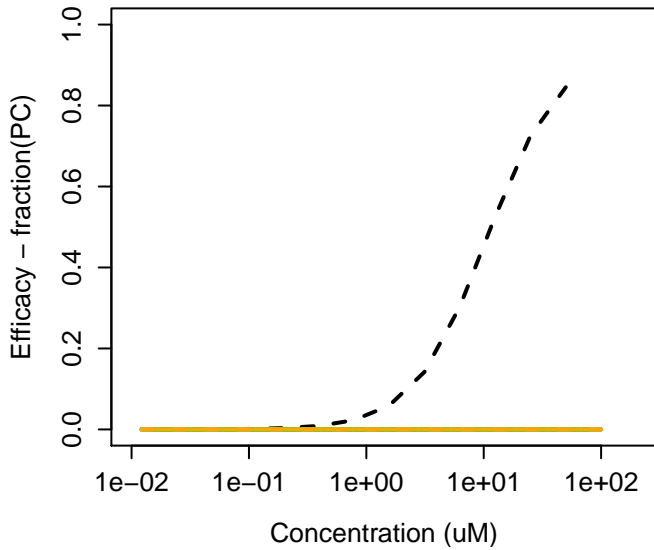

654055-01-3 : Morin hydrate  
Agonist: 0 Antagonist: 0

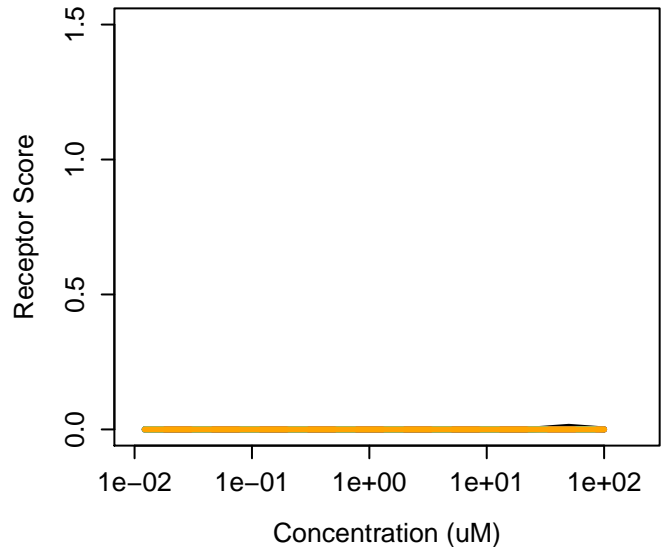

65-45-2 : Salicylamide

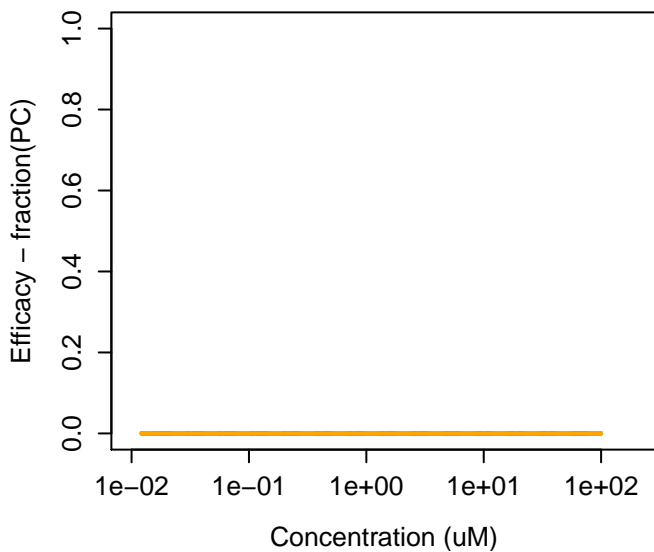

65-45-2 : Salicylamide  
Agonist: 0 Antagonist: 0



657-84-1 : Sodium 4-methylbenzenesulfonate



657-84-1 : Sodium 4-methylbenzenesulfonate  
Agonist: 0 Antagonist: 0



65-85-0 : Benzoic acid



65-85-0 : Benzoic acid  
Agonist: 0 Antagonist: 0



6610-29-3 : N-Methylhydrazinecarbothioamide

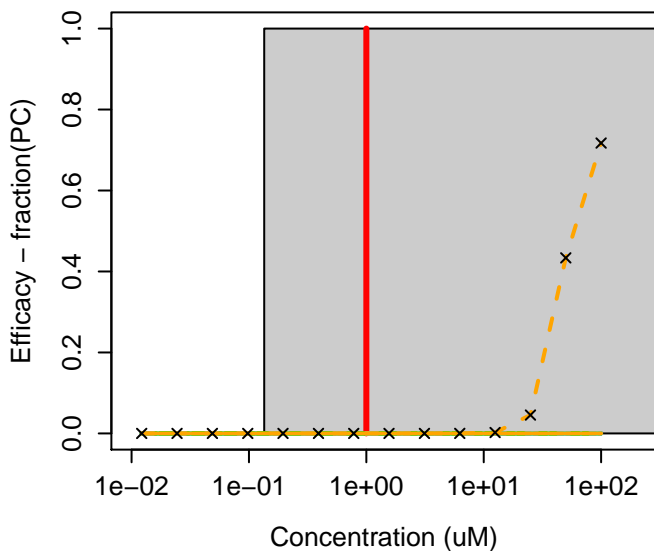

6610-29-3 : N-Methylhydrazinecarbothioamide  
Agonist: 0 Antagonist: 0

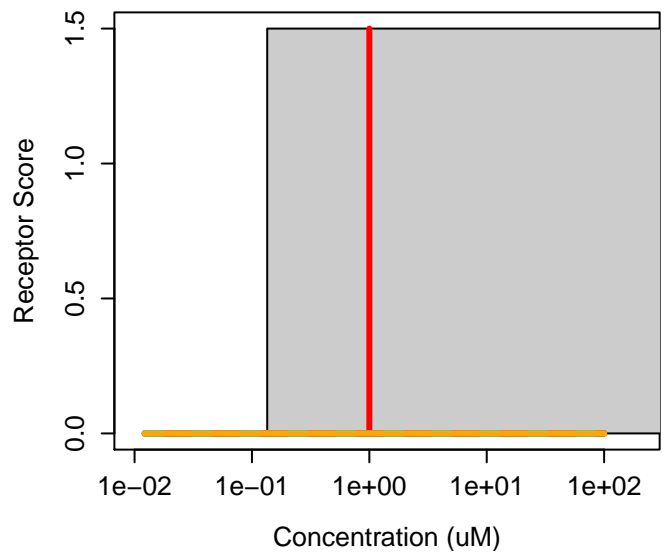



66215-27-8 : Cyromazine



66215-27-8 : Cyromazine  
Agonist: 0 Antagonist: 0



66230-04-4 : Esfenvalerate

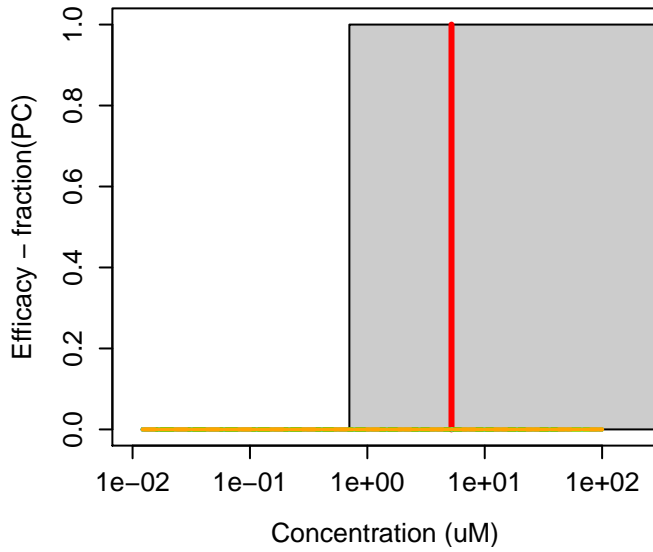

66230-04-4 : Esfenvalerate  
Agonist: 0 Antagonist: 0

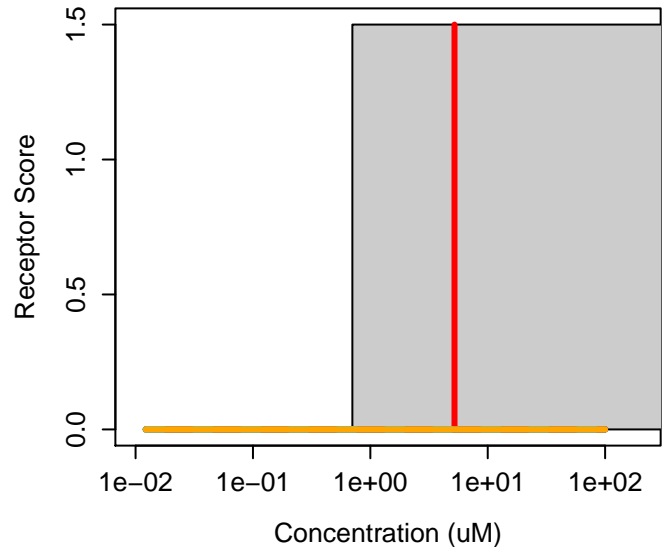

6624-73-3 : Pentane-1,5-diyl dibenzoate

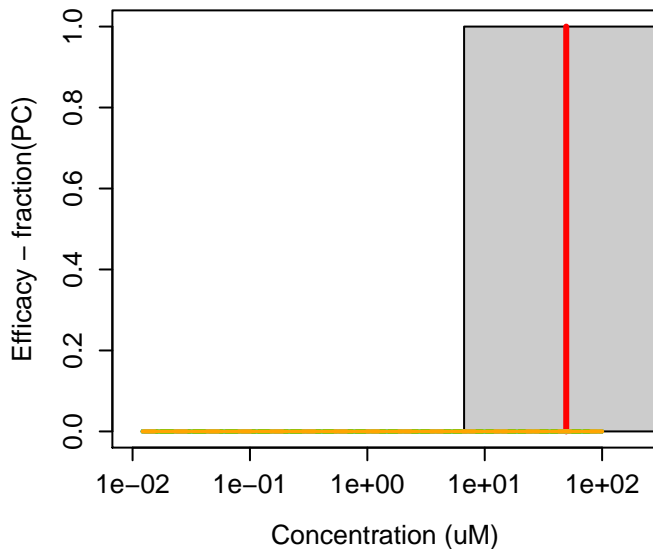

6624-73-3 : Pentane-1,5-diyl dibenzoate  
Agonist: 0 Antagonist: 0

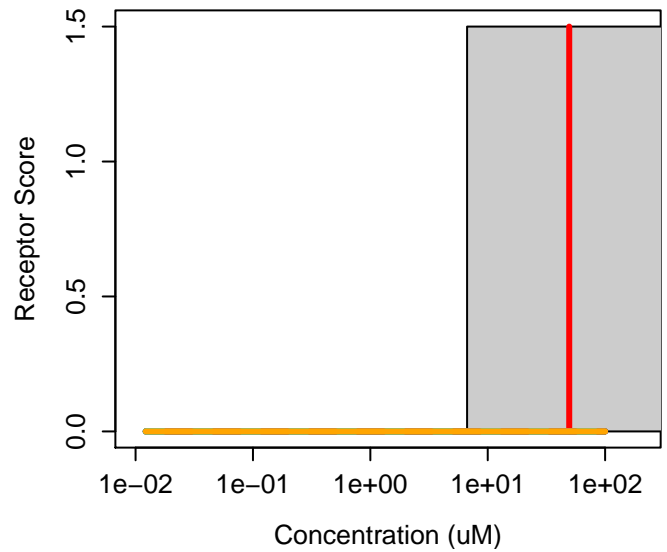

6625-46-3 : C.I. Acid Violet 12, disodium salt

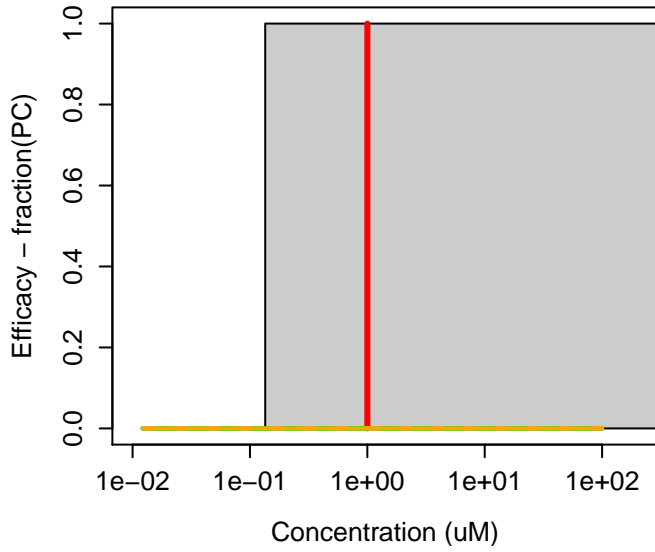

6625-46-3 : C.I. Acid Violet 12, disodium salt  
Agonist: 0 Antagonist: 0



66-27-3 : Methyl methanesulfonate



66-27-3 : Methyl methanesulfonate  
Agonist: 0 Antagonist: 0



66332-96-5 : Flutolanil

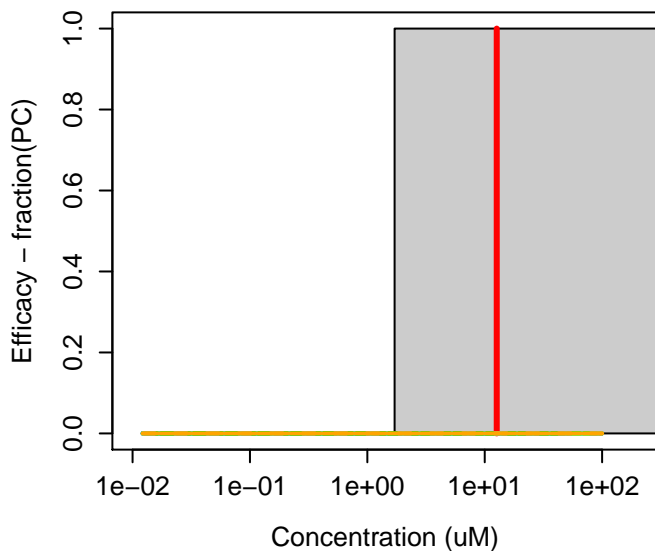

66332-96-5 : Flutolanil  
Agonist: 0 Antagonist: 0

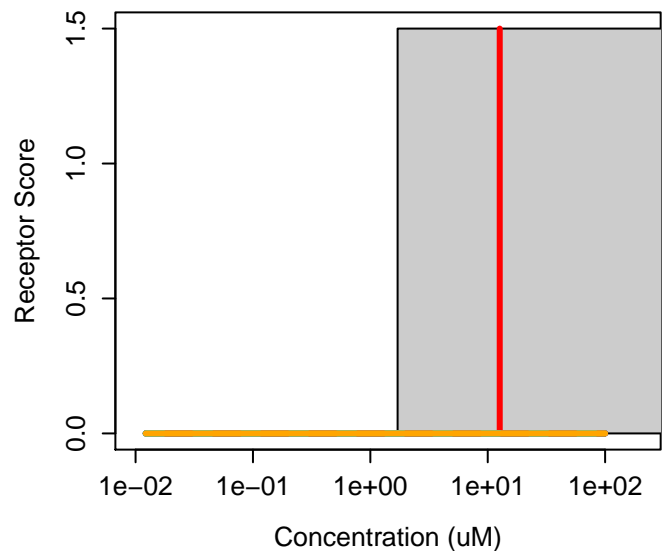

66357-35-5 : Ranitidine

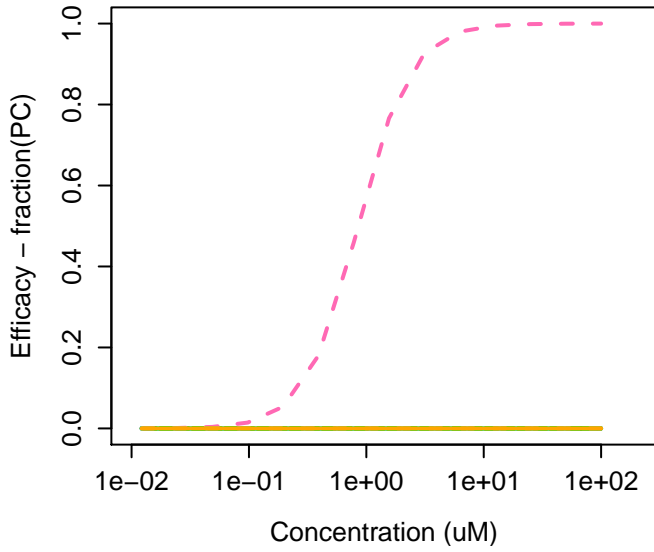

66357-35-5 : Ranitidine  
Agonist: 0.00031 Antagonist: 0

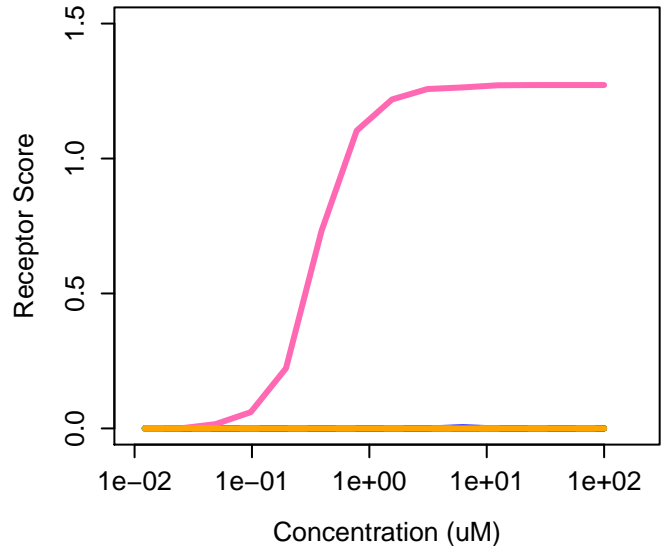

66441-23-4 : Fenoxaprop-ethyl

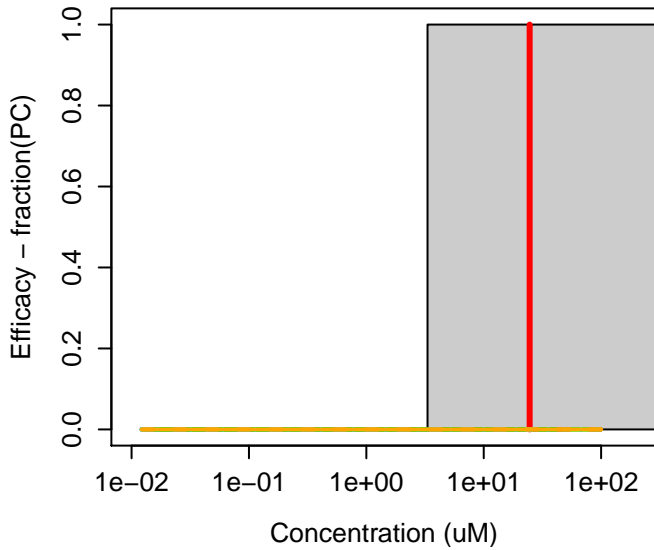

66441-23-4 : Fenoxaprop-ethyl  
Agonist: 0 Antagonist: 0

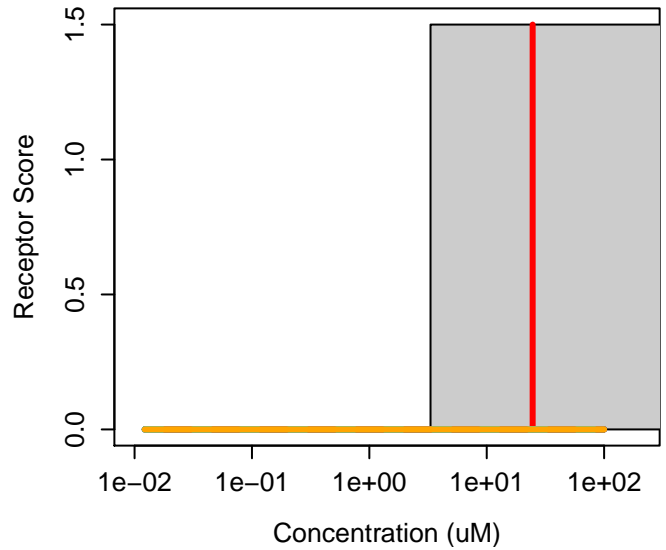

66456-53-9 : Adipic acid, polypropyleneglycol, lau 66456-53-9 : Adipic acid, polypropyleneglycol, lau  
Agonist: 0 Antagonist: 0

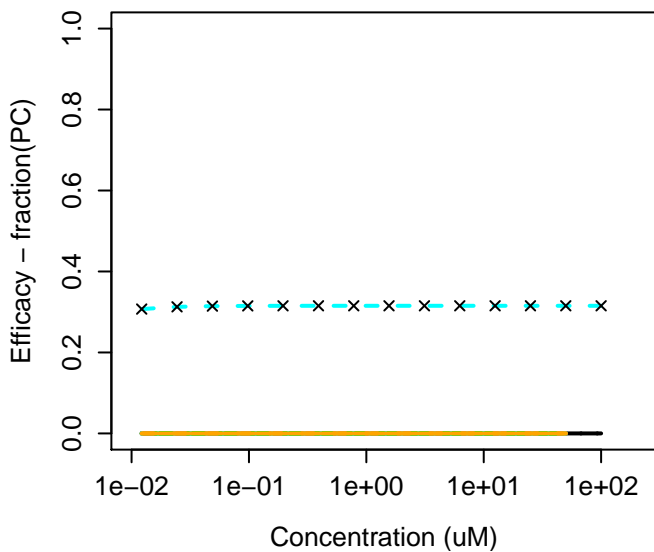

66575-29-9 : Forskolin

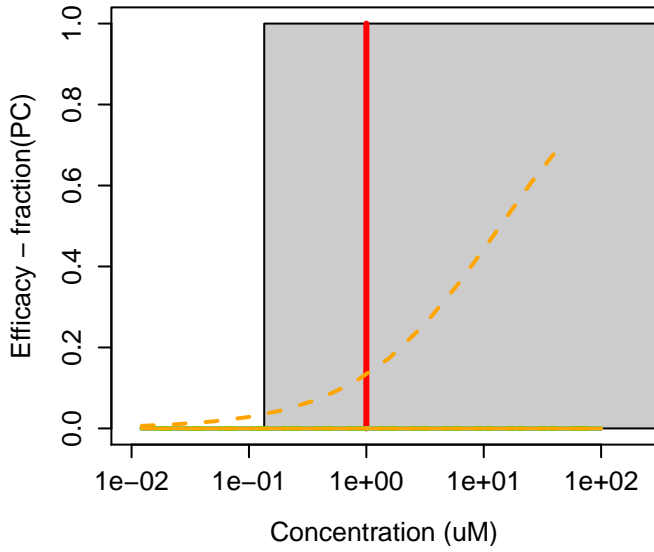

66575-29-9 : Forskolin  
Agonist: 0 Antagonist: 0



66-71-7 : 1,10-Phenanthroline

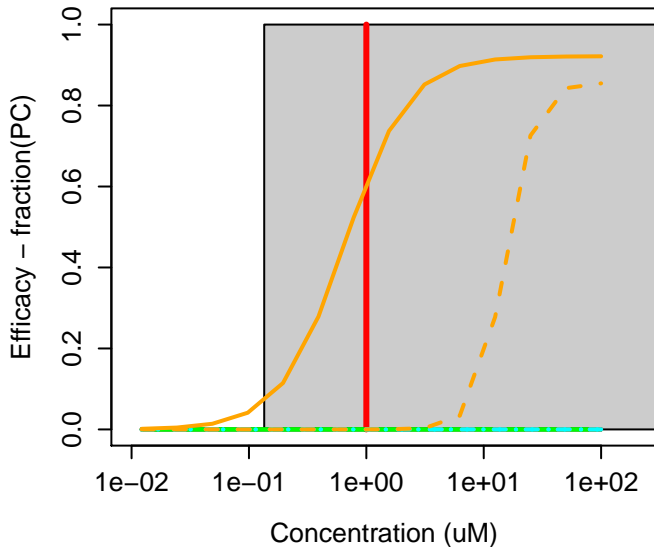

66-71-7 : 1,10-Phenanthroline  
Agonist: 0 Antagonist: 5e-04

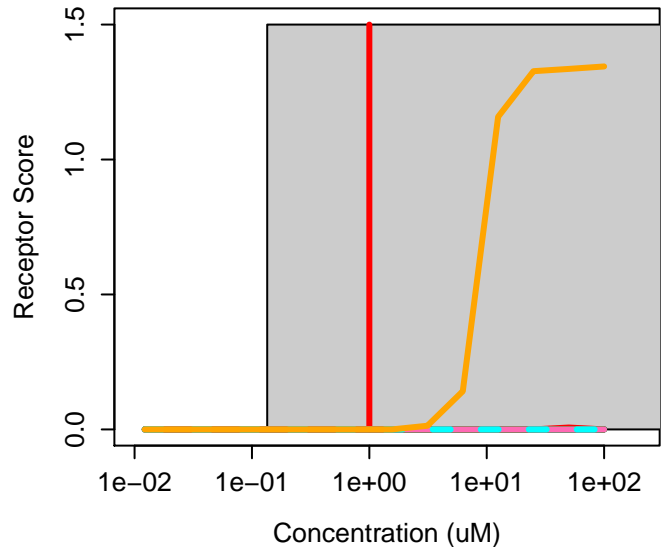

66-81-9 : Cycloheximide

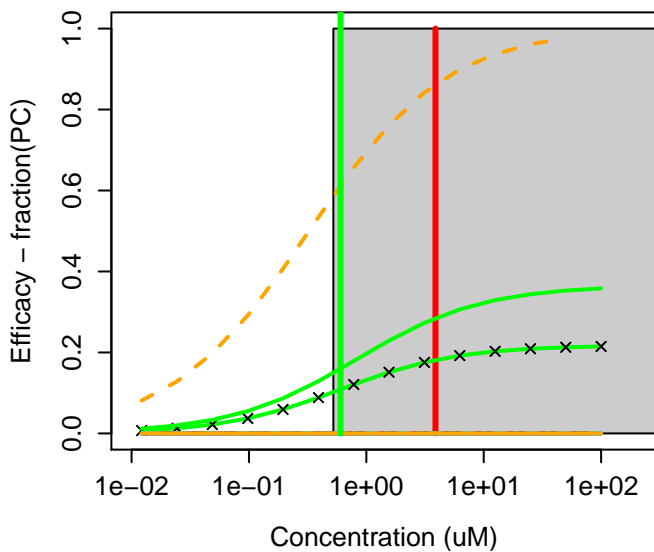

66-81-9 : Cycloheximide  
Agonist: 0 Antagonist: 0.22

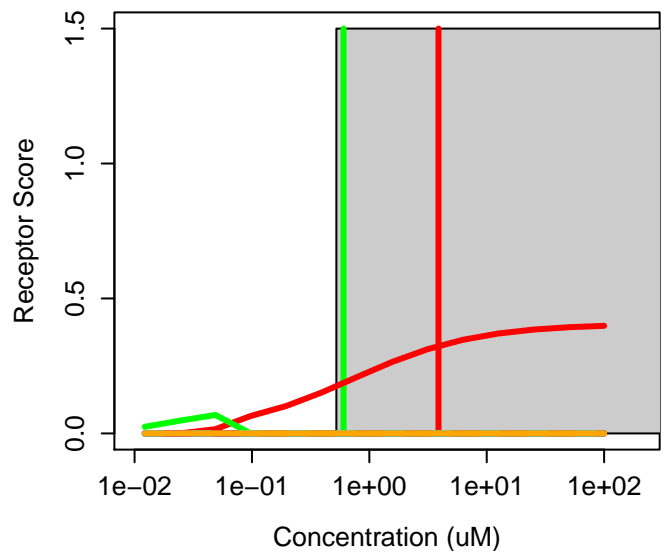

6683-19-8 : Irganox 1010



6683-19-8 : Irganox 1010  
Agonist: 0 Antagonist: 0



668981-02-0 : CP-863187

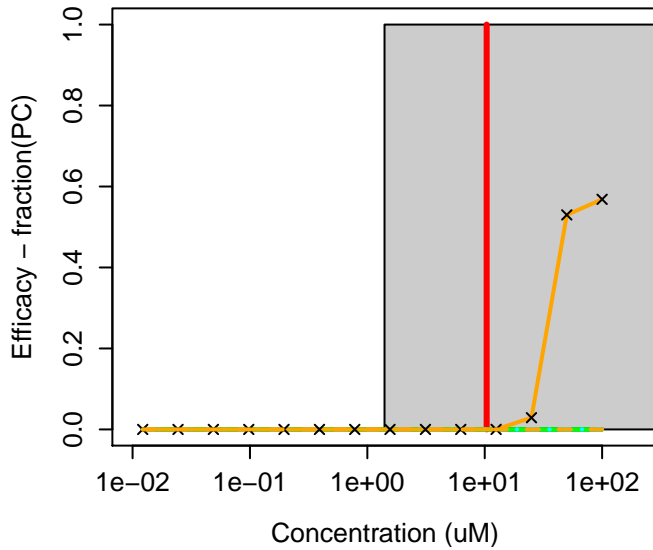

668981-02-0 : CP-863187  
Agonist: 0 Antagonist: 0

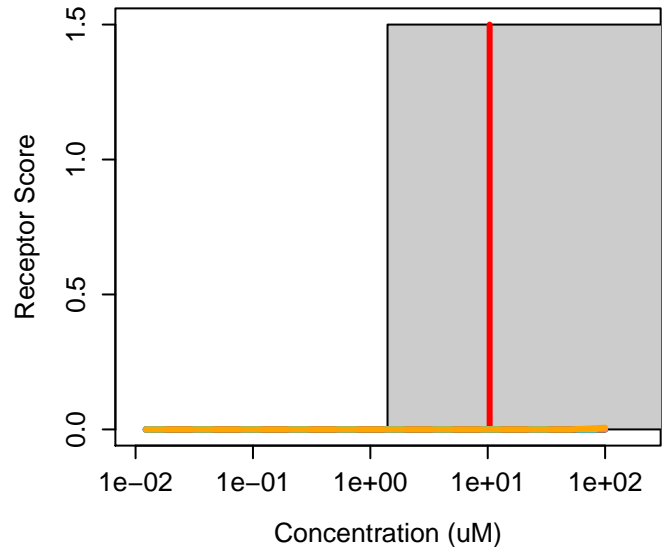

6706-59-8 : L-Glucitol



6706-59-8 : L-Glucitol  
Agonist: 0 Antagonist: 0



67-20-9 : Nitrofurantoin

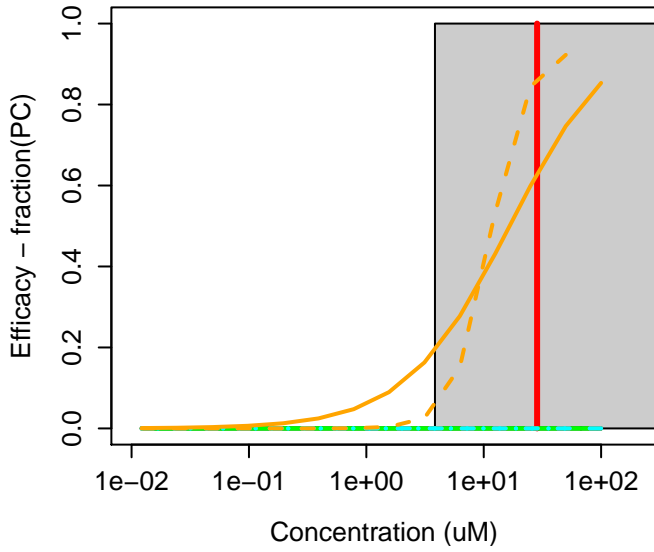

67-20-9 : Nitrofurantoin  
Agonist: 0 Antagonist: 0

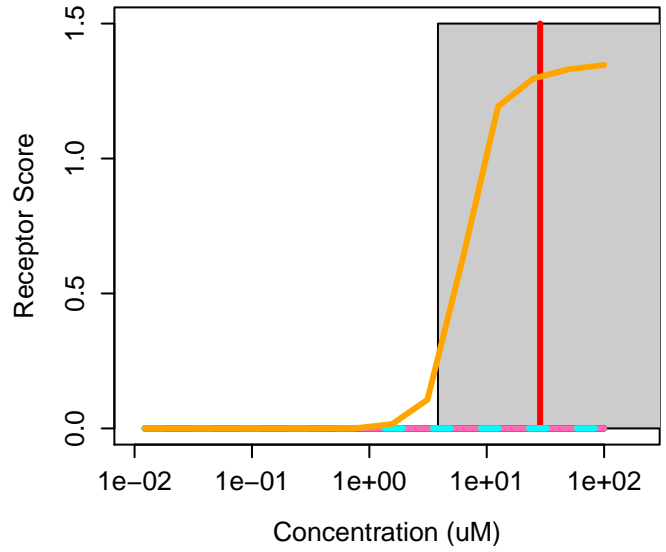

6728-26-3 : (2E)-2-Hexenal



6728-26-3 : (2E)-2-Hexenal  
Agonist: 0 Antagonist: 0



67-30-1 : Tetrac

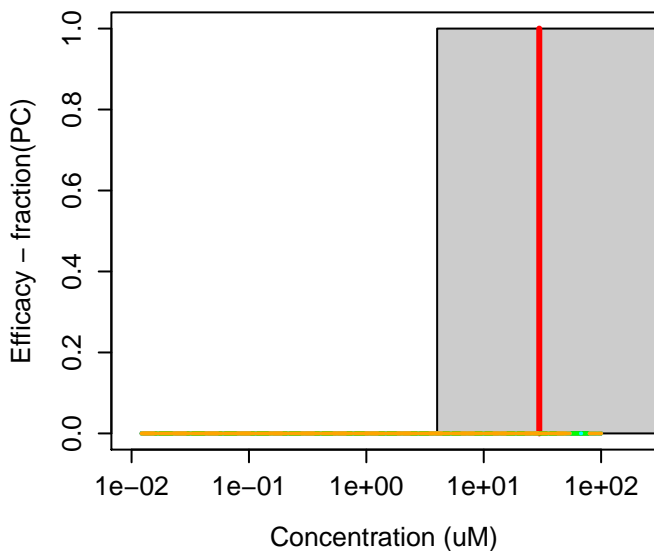

67-30-1 : Tetrac  
Agonist: 0 Antagonist: 0

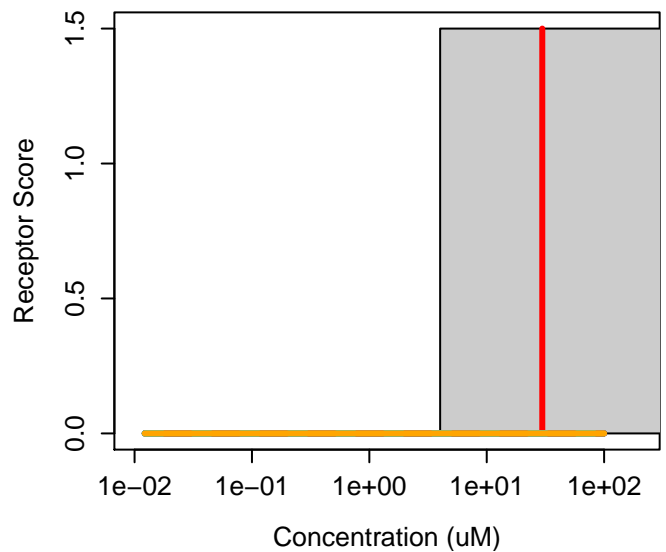

6734-80-1 : Metam-sodium hydrate

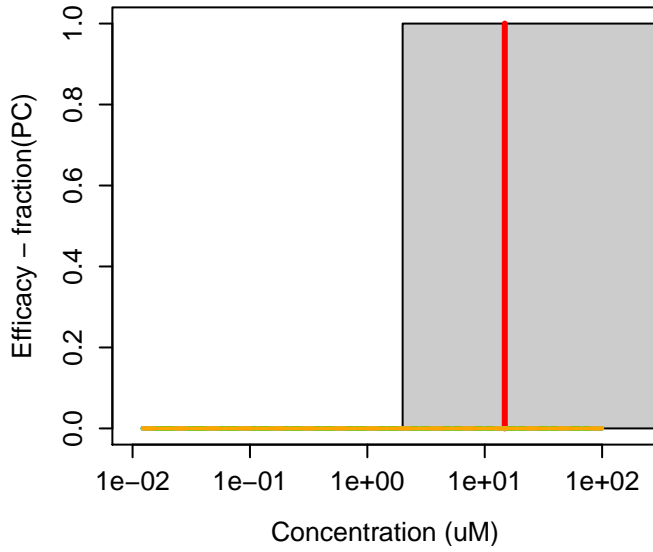

6734-80-1 : Metam-sodium hydrate  
Agonist: 0 Antagonist: 0

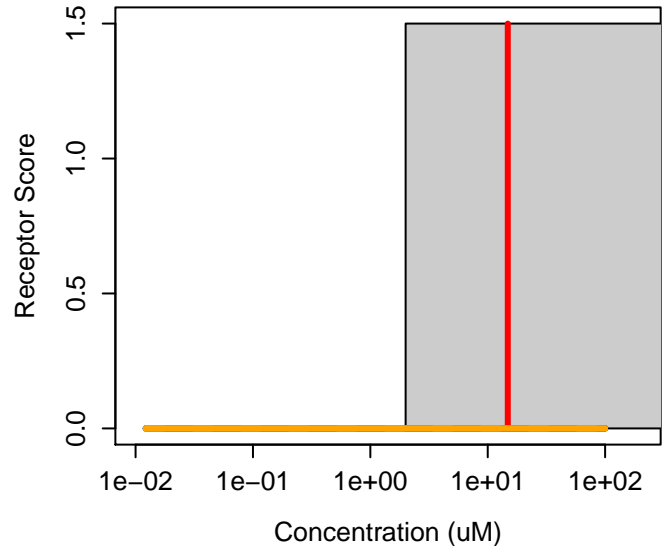

67485-29-4 : Hydramethylnon

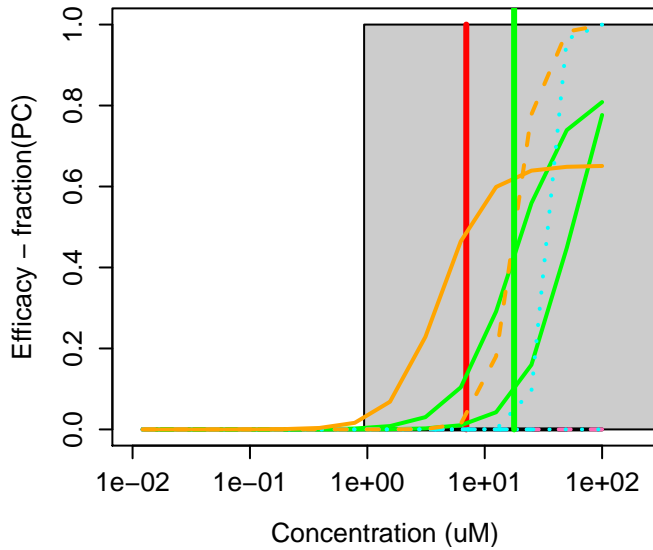

67485-29-4 : Hydramethylnon  
Agonist: 0 Antagonist: 0.24

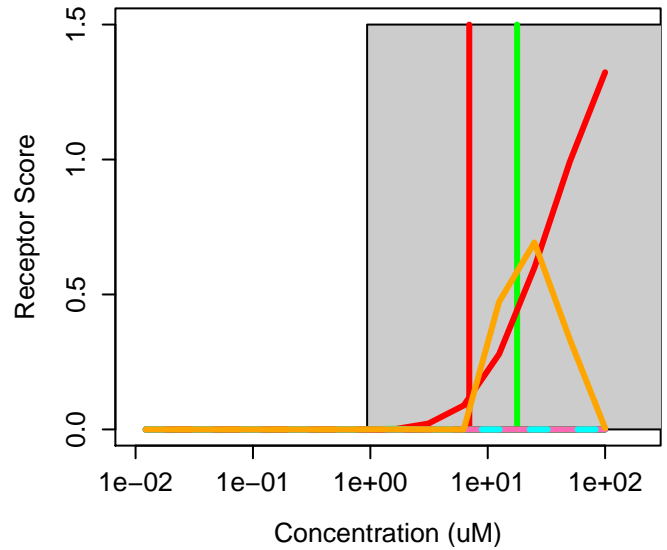

67564-91-4 : (2R,6S)-Fenpropimorph

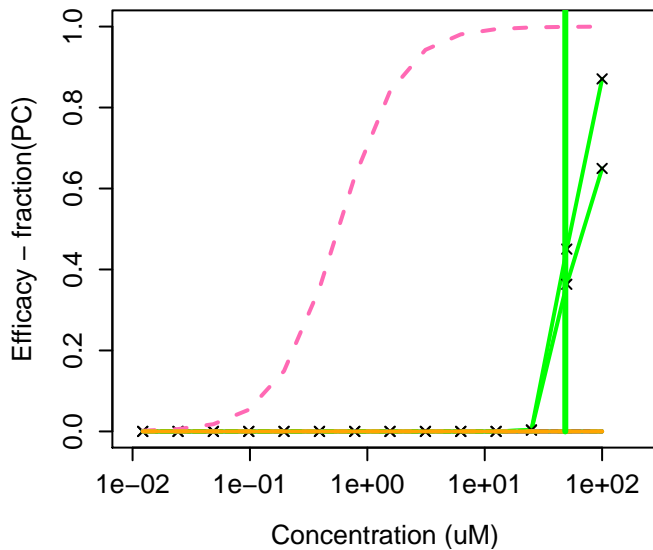

67564-91-4 : (2R,6S)-Fenpropimorph  
Agonist: 0.073 Antagonist: 0

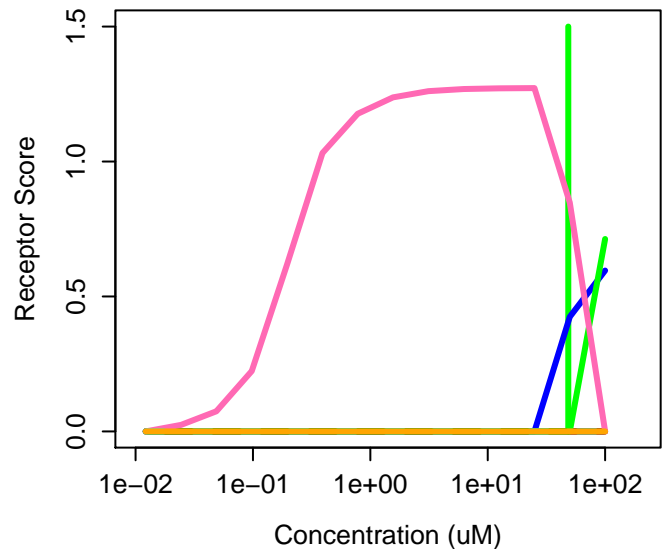

676116-04-4 : PD 0343701

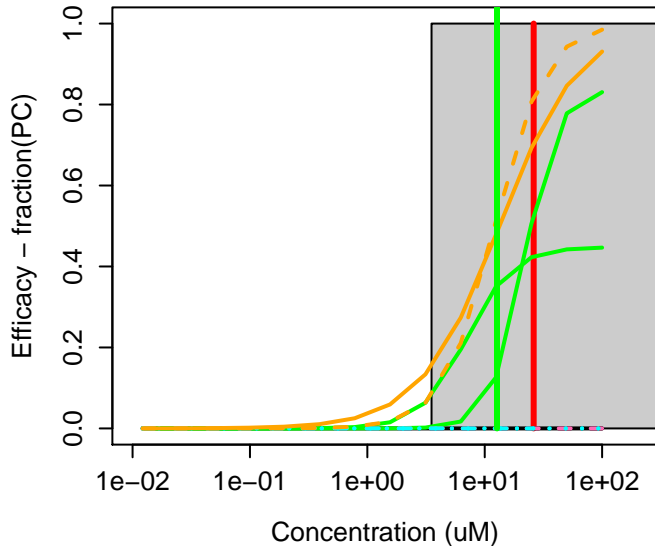

676116-04-4 : PD 0343701  
Agonist: 0 Antagonist: 0.24

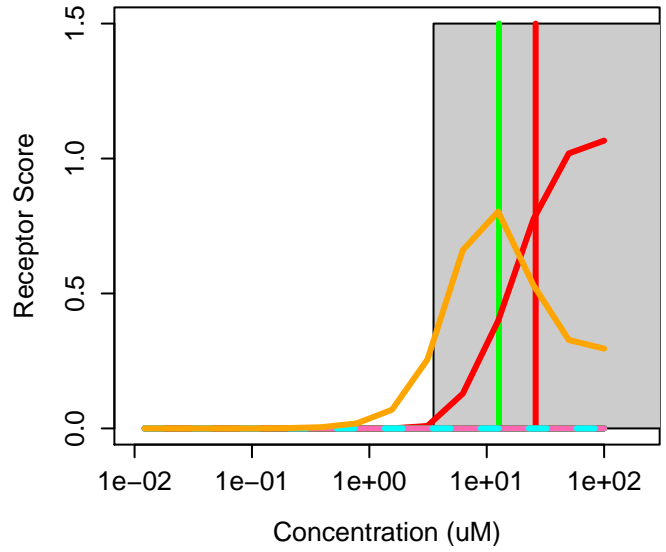

67-68-5 : Dimethyl sulfoxide



67-68-5 : Dimethyl sulfoxide  
Agonist: 0 Antagonist: 0



67747-09-5 : Prochloraz

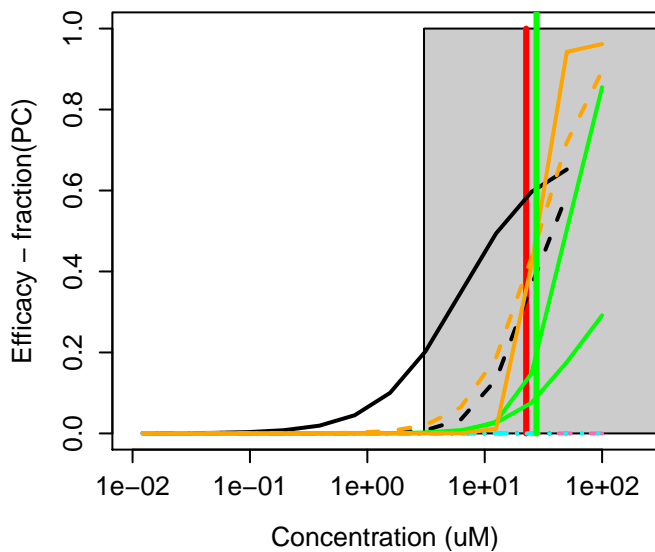

67747-09-5 : Prochloraz  
Agonist: 0 Antagonist: 0.3

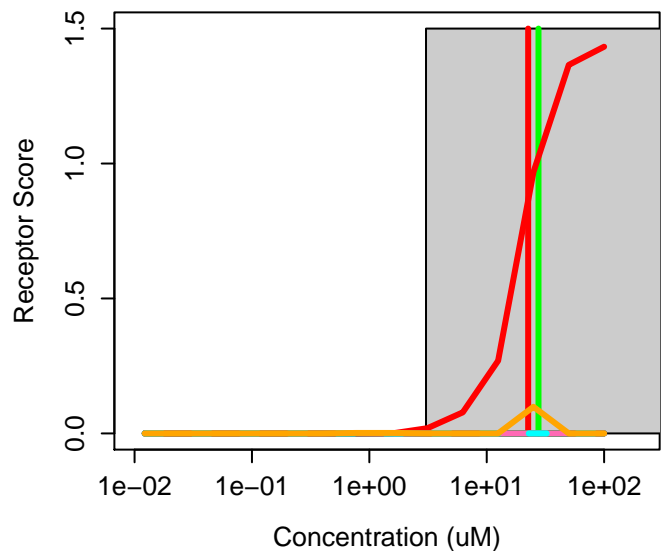



67786-14-5 : Acid Red 337

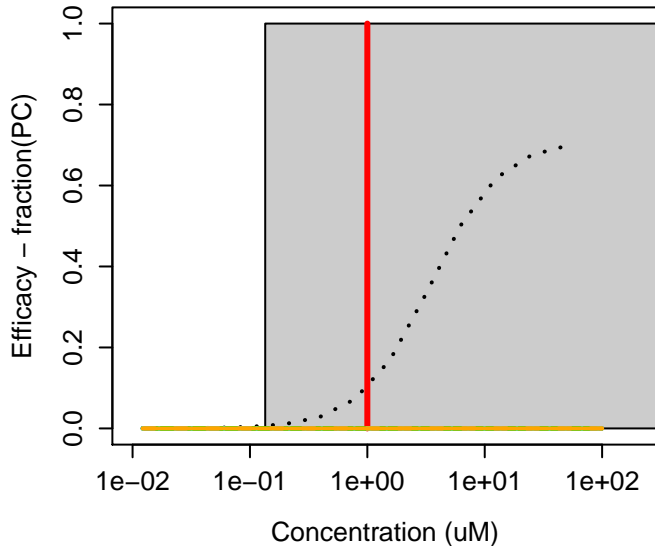

67786-14-5 : Acid Red 337  
Agonist: 0 Antagonist: 0

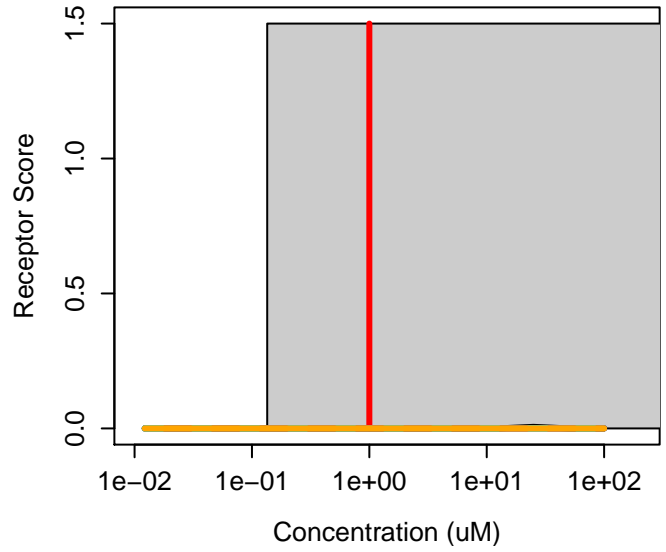

678-39-7 : 1,1,2,2-Tetrahydroperfluoro-1-decan

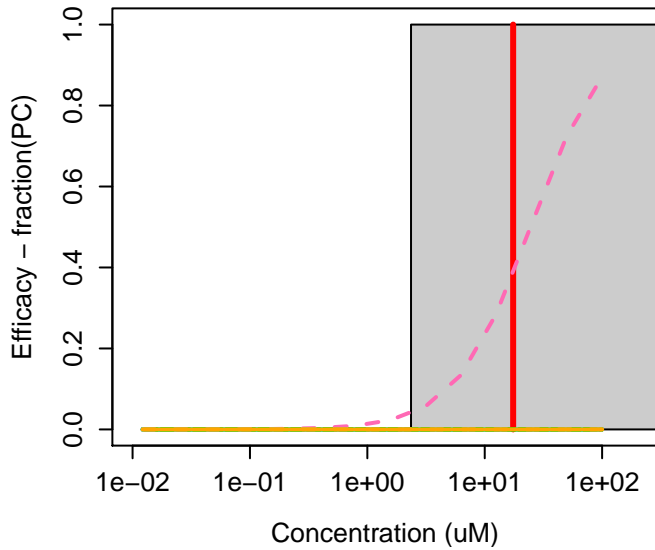

678-39-7 : 1,1,2,2-Tetrahydroperfluoro-1-decan  
Agonist: 0 Antagonist: 0

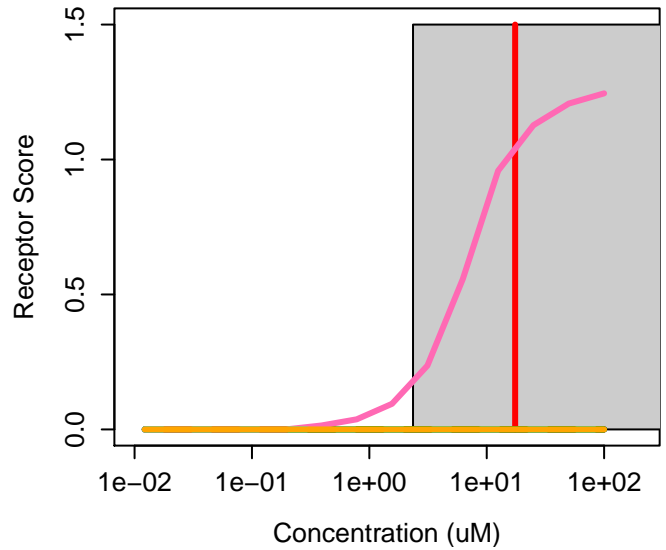

6789-88-4 : Hexyl benzoate

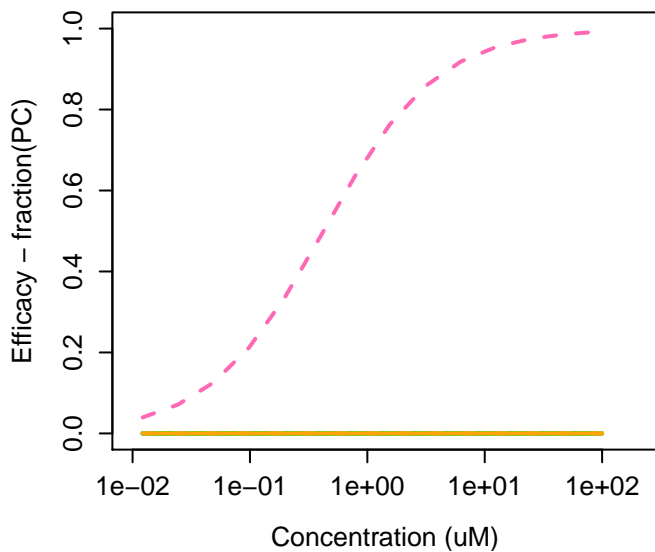

6789-88-4 : Hexyl benzoate  
Agonist: 8.7e-06 Antagonist: 0

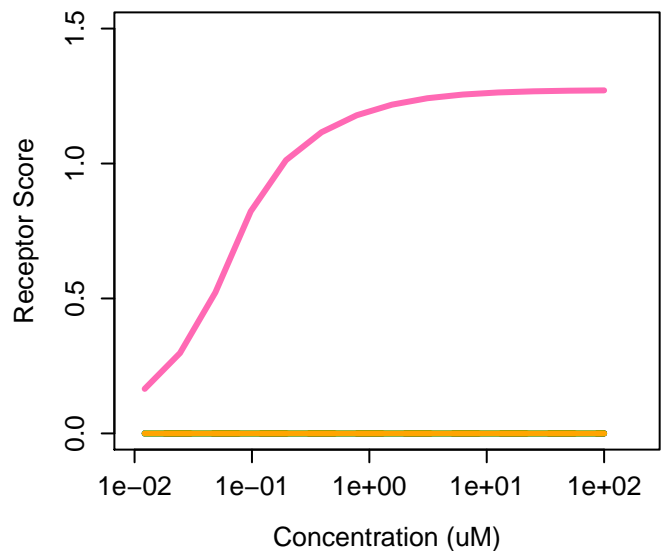

68-11-1 : Thioglycolic acid



68-11-1 : Thioglycolic acid  
Agonist: 0 Antagonist: 0



68-12-2 : N,N-Dimethylformamide



68-12-2 : N,N-Dimethylformamide  
Agonist: 0 Antagonist: 0



68157-60-8 : Forchlorfenuron

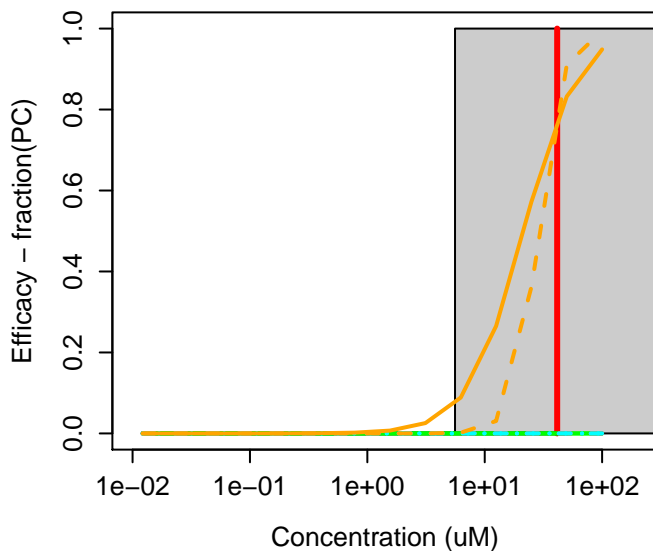

68157-60-8 : Forchlorfenuron  
Agonist: 0 Antagonist: 0

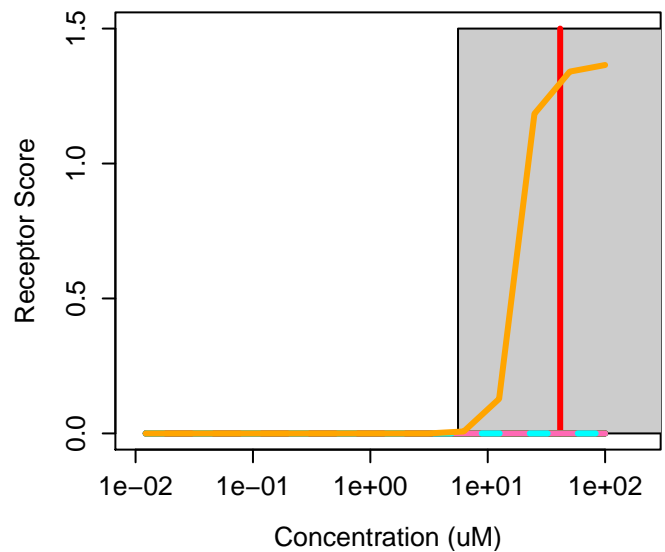

68169-03-9 : (Dicyclopentadienyloxy)ethyl methacry 68169-03-9 : (Dicyclopentadienyloxy)ethyl methacry  
Agonist: 0 Antagonist: 0



682-01-9 : Tetrapropyl orthosilicate



68-22-4 : Norethindrone

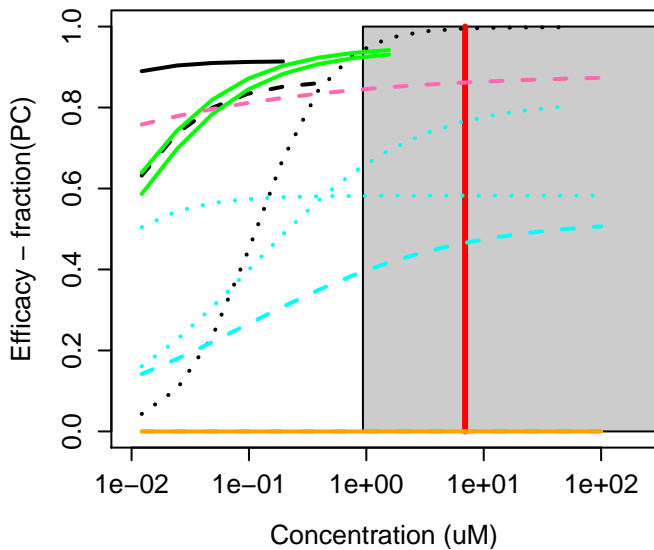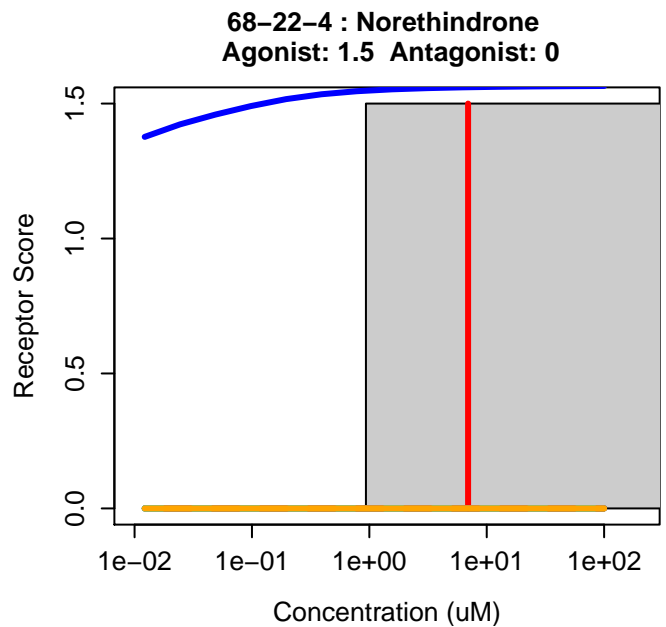

68-22-4 : Norethindrone  
Agonist: 1.5 Antagonist: 0

68-26-8 : Retinol

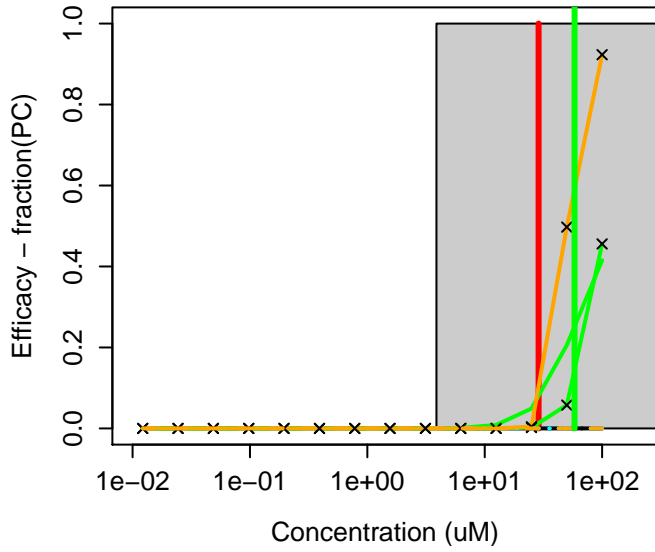

68-26-8 : Retinol  
Agonist: 0 Antagonist: 0.056

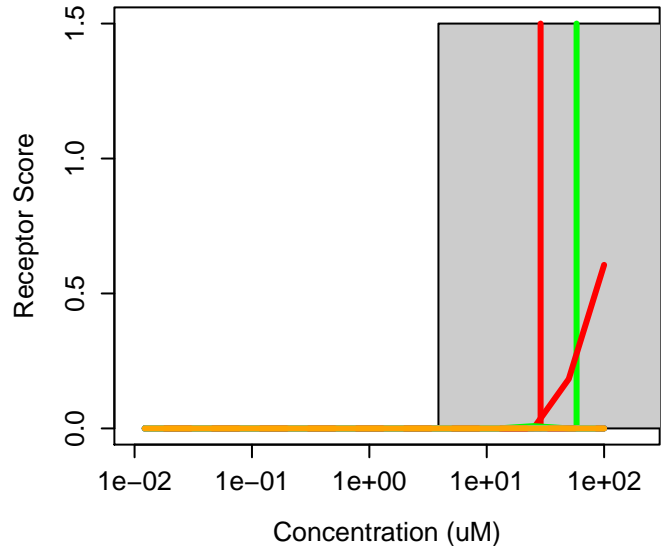

683-18-1 : Dibutyltin dichloride

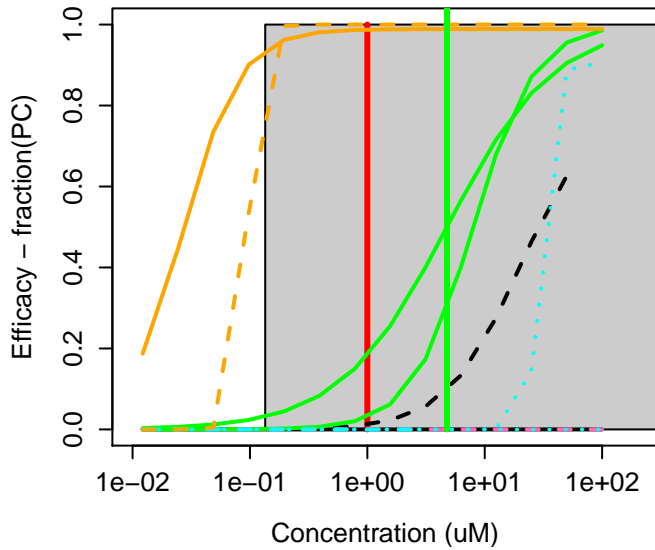

683-18-1 : Dibutyltin dichloride  
Agonist: 0 Antagonist: 0.55

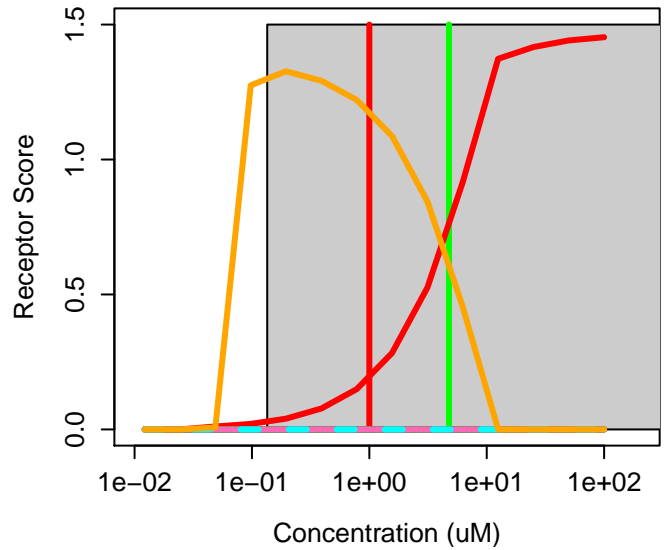

68359-37-5 : Cyfluthrin

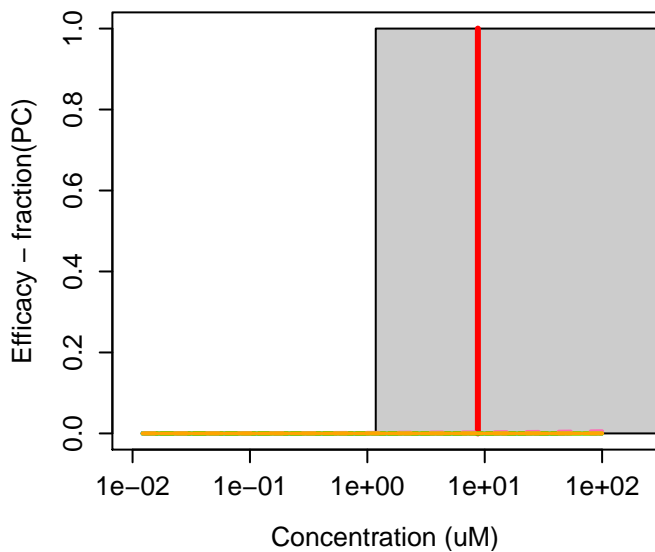

68359-37-5 : Cyfluthrin  
Agonist: 0 Antagonist: 0

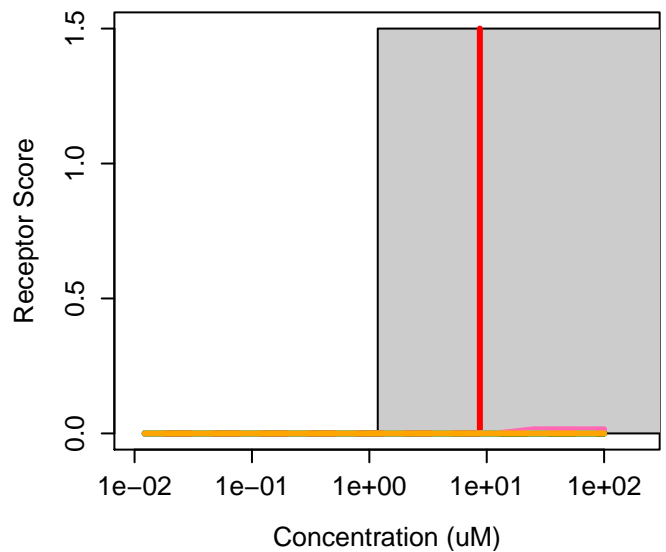

68392-35-8 : 4-Hydroxytamoxifen

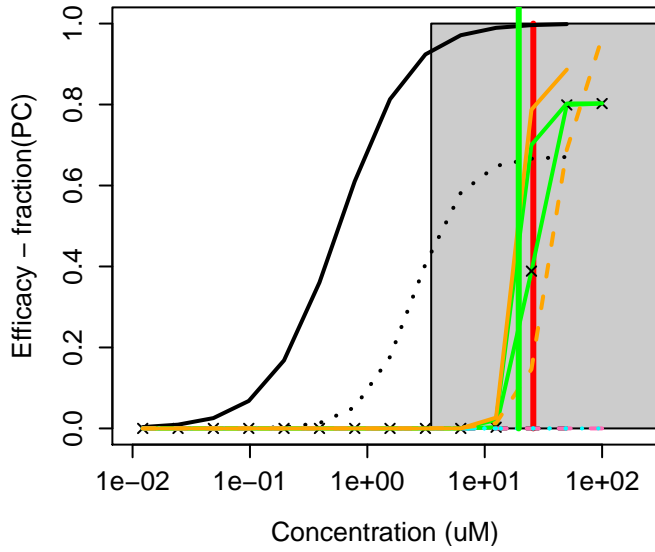

68392-35-8 : 4-Hydroxytamoxifen  
Agonist: 0 Antagonist: 0.31

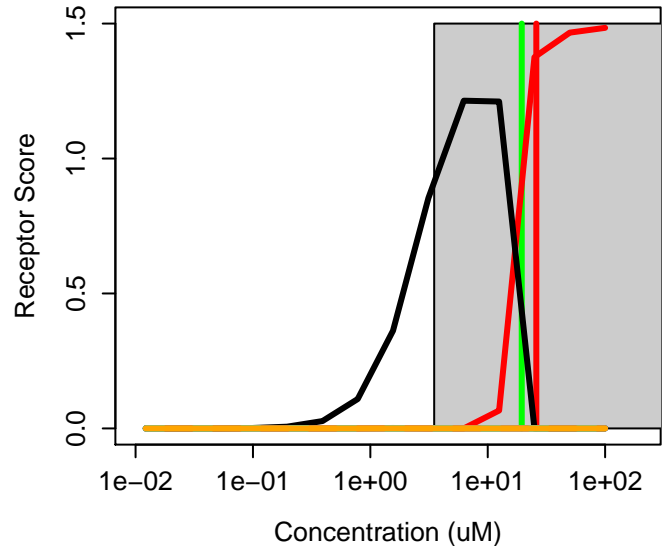

6846-50-0 : 2,2,4-Trimethyl-1,3-pentandiol diisobu  
6846-50-0 : 2,2,4-Trimethyl-1,3-pentandiol diisobu  
Agonist: 0 Antagonist: 0

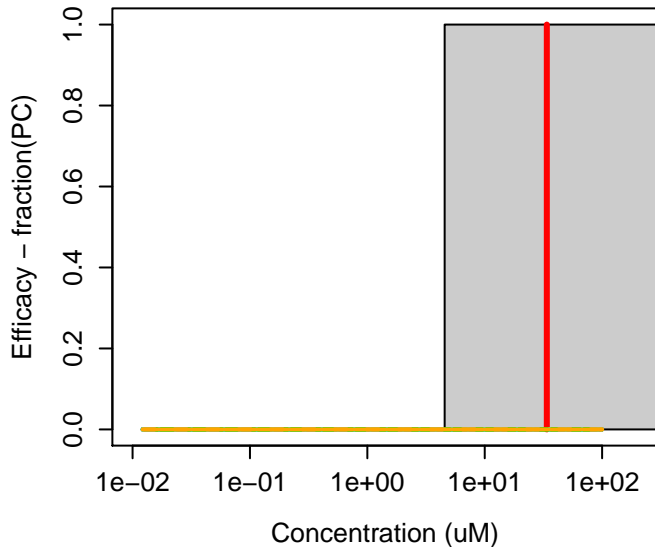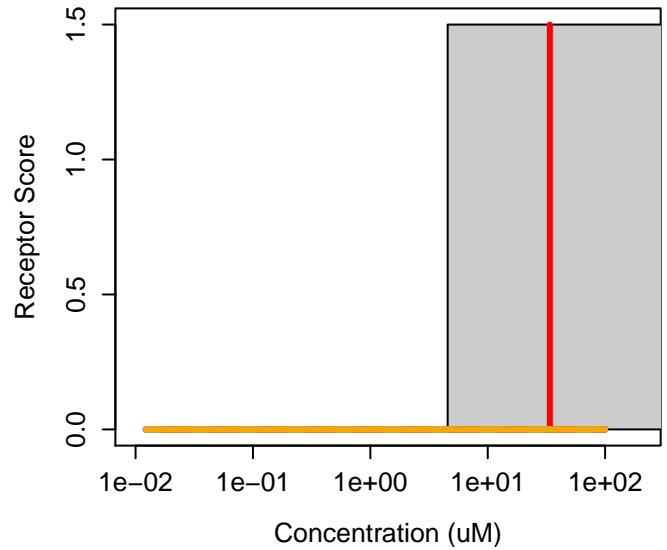

684-93-5 : N-Nitroso-N-methylurea

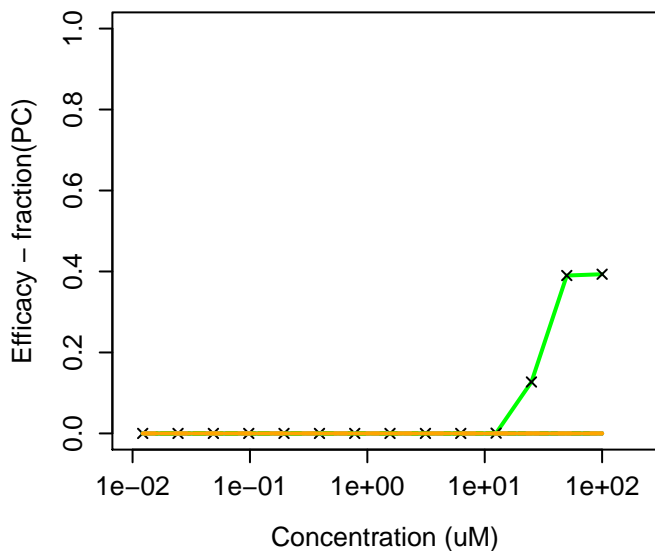

684-93-5 : N-Nitroso-N-methylurea  
Agonist: 0 Antagonist: 0



68515-48-0 : DINP branched



68515-48-0 : DINP branched  
Agonist: 0 Antagonist: 0



1,2-Benzenedicarboxylic acid, di-C9-11-branched all,2-Benzenedicarboxylic acid, di-C9-11-branched al  
Agonist: 0 Antagonist: 0

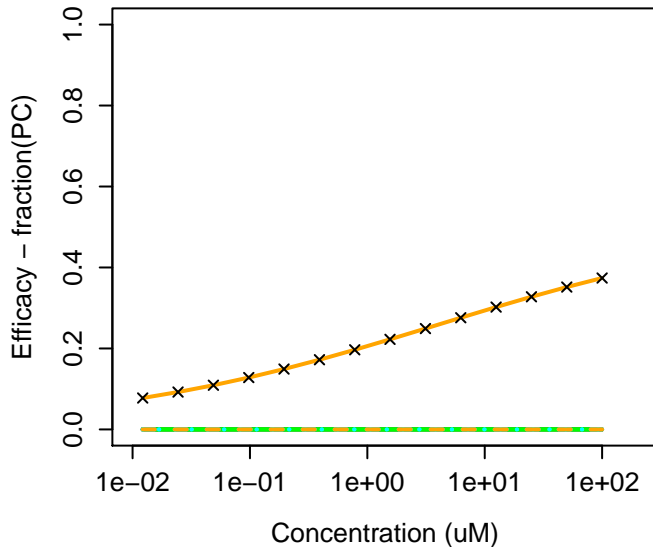

75-3 : Hexanedioic acid, di-C7-9-branched and linea75-3 : Hexanedioic acid, di-C7-9-branched and linea  
Agonist: 0 Antagonist: 0



68555-86-2 : Acid Orange 156

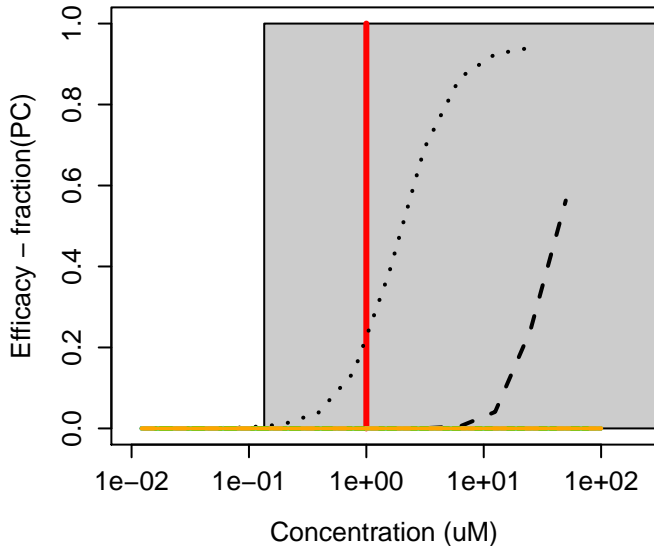

68555-86-2 : Acid Orange 156  
Agonist: 3.1e-05 Antagonist: 0

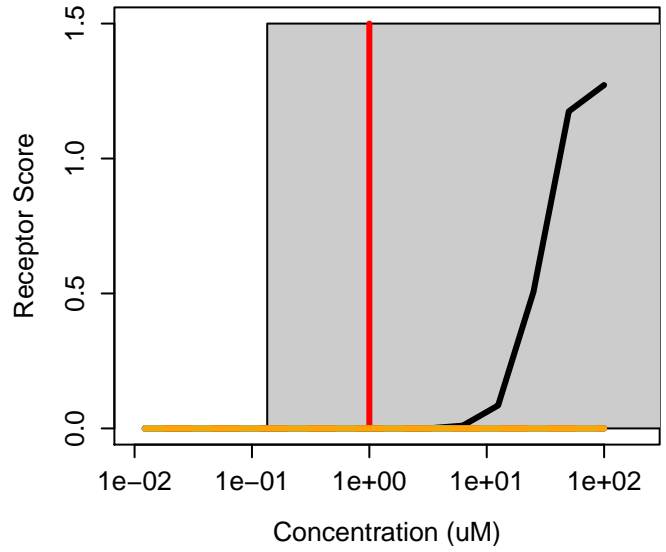

68609-97-2 : C12-14-Alkyl glycidyl ether



68609-97-2 : C12-14-Alkyl glycidyl ether  
Agonist: 0 Antagonist: 0



686756-87-6 : PharmaGSID\_48519

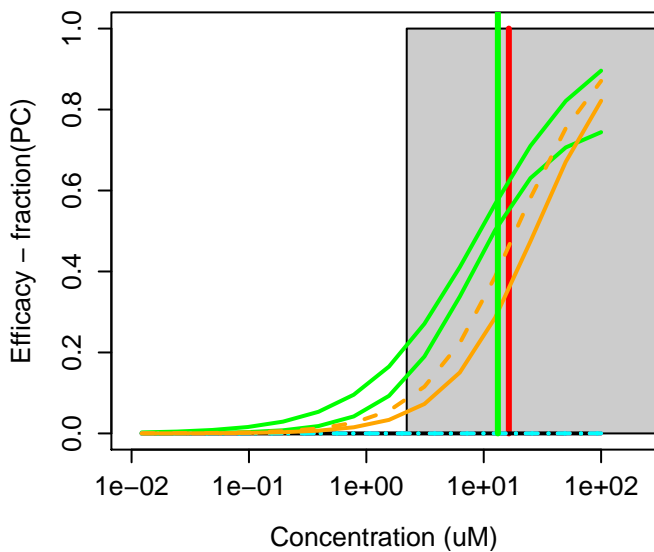

686756-87-6 : PharmaGSID\_48519  
Agonist: 0 Antagonist: 0.31

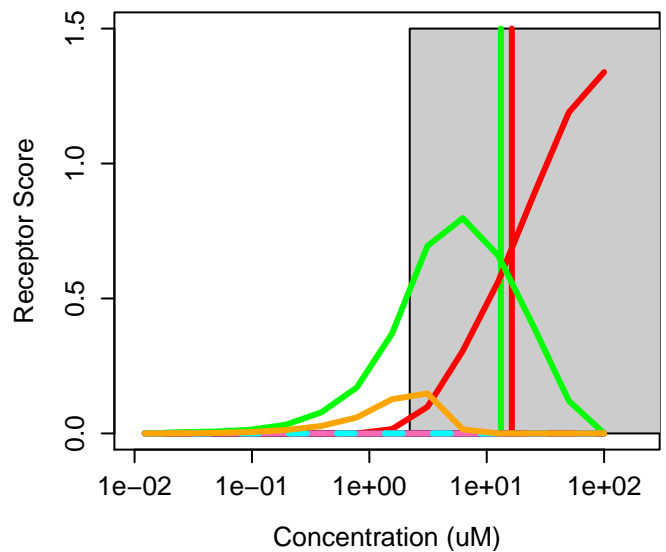

68694-11-1 : Triflumizole

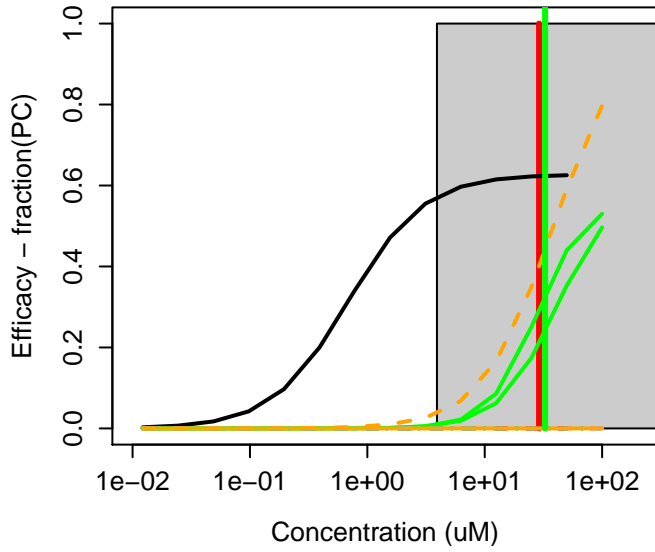

68694-11-1 : Triflumizole  
Agonist: 0 Antagonist: 0.21

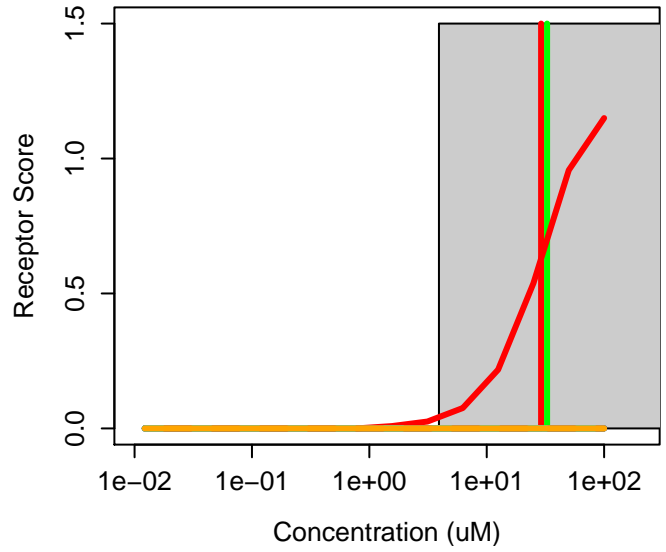

68917-18-0 : Cornmint oil

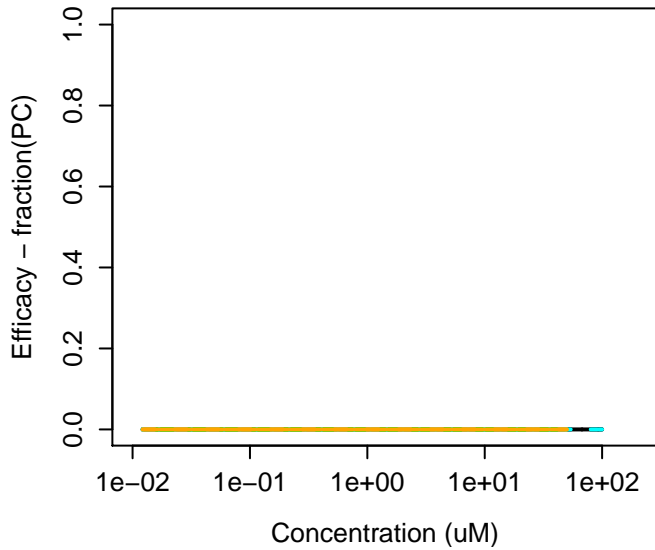

68917-18-0 : Cornmint oil  
Agonist: 0 Antagonist: 0



6893-02-3 : 3,5,3'-Triiodothyronine

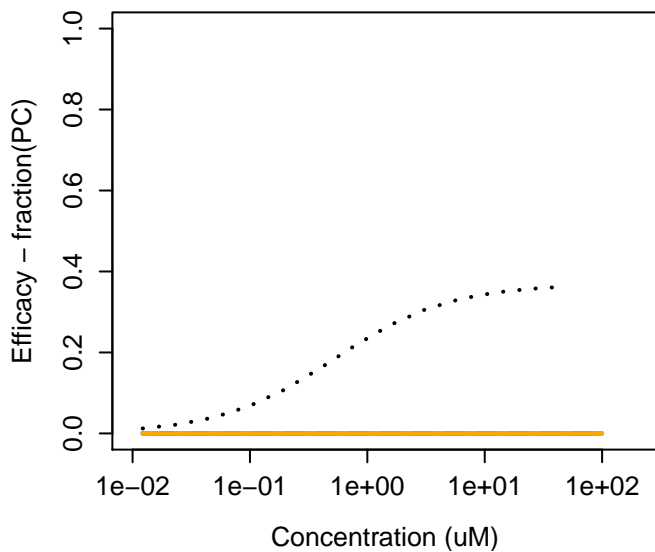

6893-02-3 : 3,5,3'-Triiodothyronine  
Agonist: 0 Antagonist: 0





68959-20-6 : Disiquonium chloride

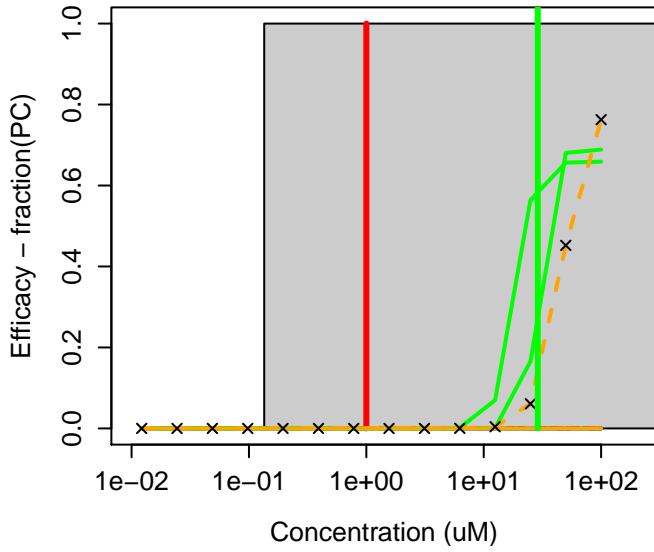

68959-20-6 : Disiquonium chloride  
Agonist: 0 Antagonist: 0.076

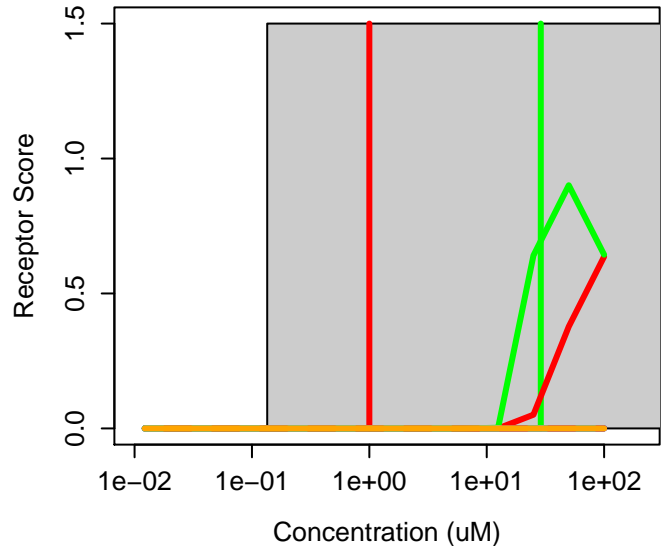

68-96-2 : 17alpha-Hydroxyprogesterone

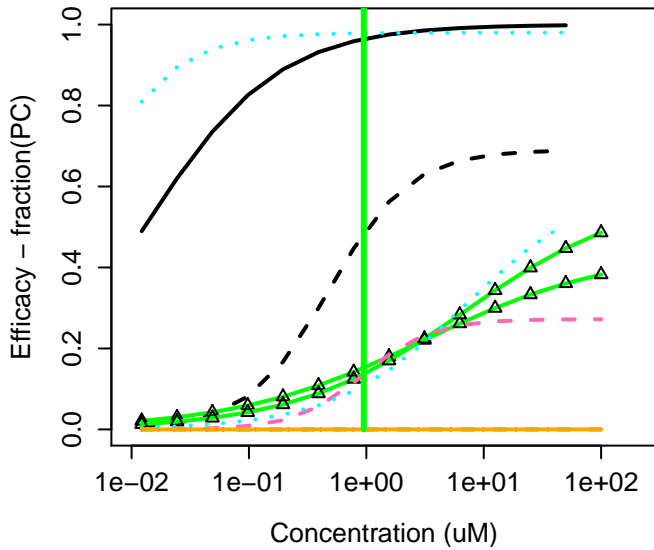

68-96-2 : 17alpha-Hydroxyprogesterone  
Agonist: 0.94 Antagonist: 0

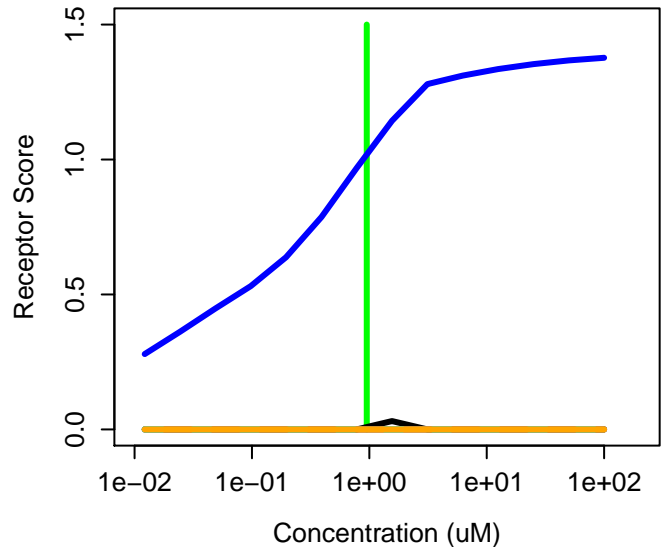

69-09-0 : Chlorpromazine hydrochloride

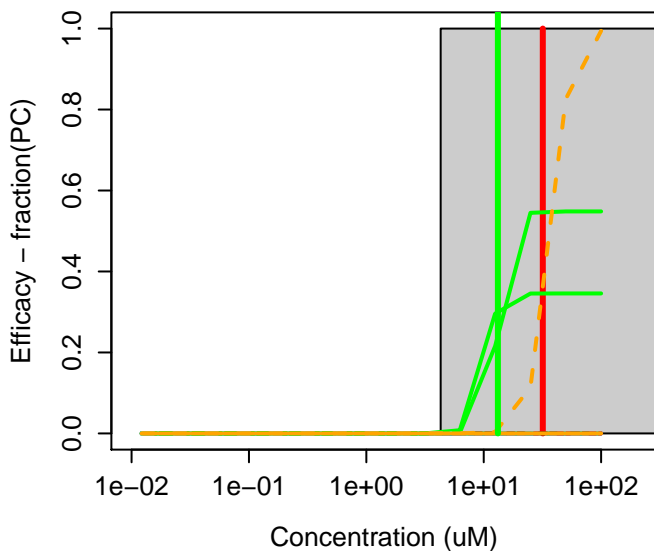

69-09-0 : Chlorpromazine hydrochloride  
Agonist: 0 Antagonist: 0.093

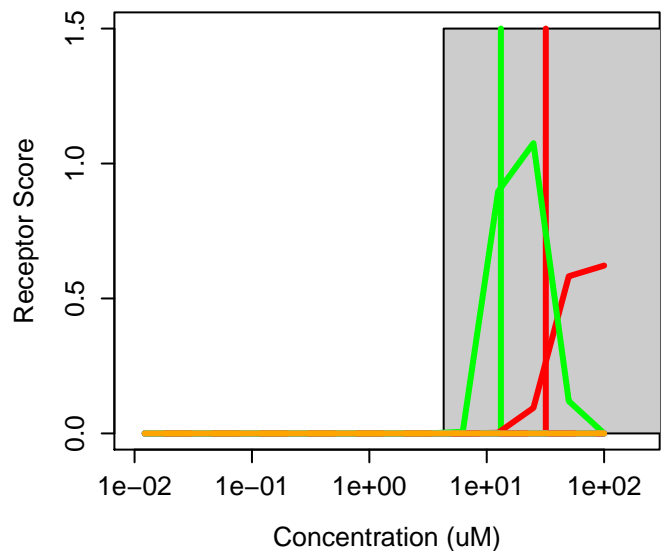

**6915-15-7 : Malic acid**



**6915-15-7 : Malic acid  
Agonist: 0 Antagonist: 0**



**6923-22-4 : Monocrotophos**



**6923-22-4 : Monocrotophos  
Agonist: 0 Antagonist: 0**



**692-86-4 : Ethyl undec-10-enoate**



**692-86-4 : Ethyl undec-10-enoate  
Agonist: 0 Antagonist: 0**



69327-76-0 : Buprofezin

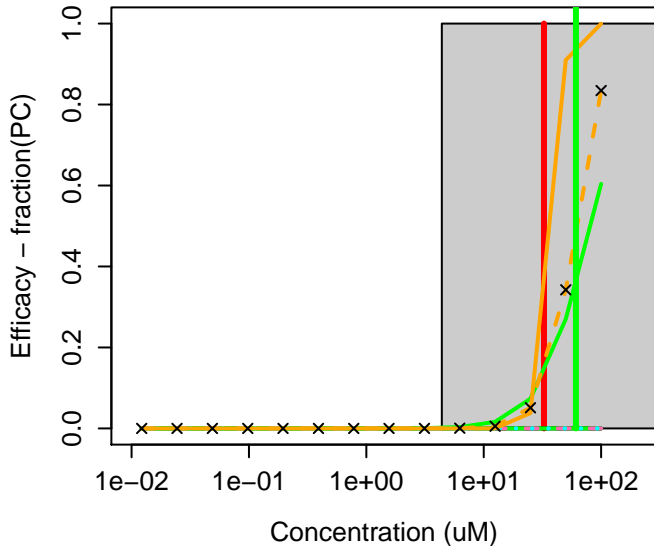

69327-76-0 : Buprofezin  
Agonist: 0 Antagonist: 0.052

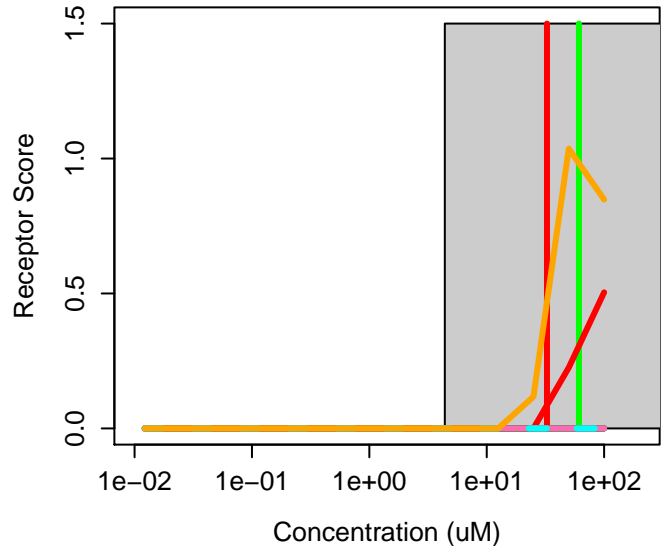

69377-81-7 : Fluroxypyr



69377-81-7 : Fluroxypyr  
Agonist: 0 Antagonist: 0



695-06-7 : gamma-Caprolactone

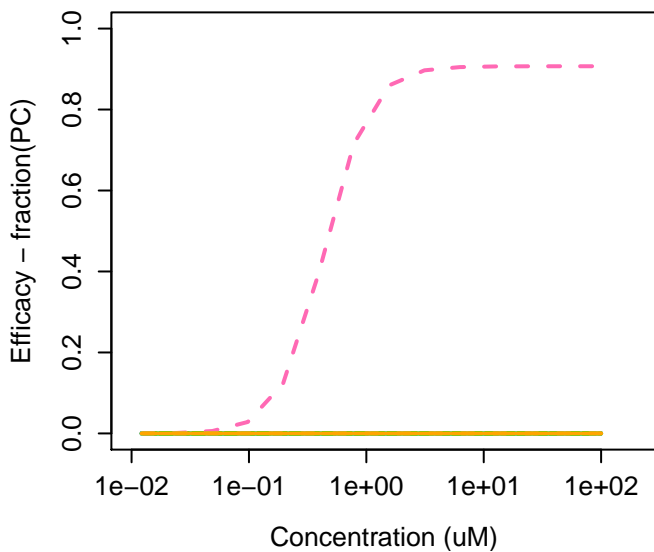

695-06-7 : gamma-Caprolactone  
Agonist: 0 Antagonist: 0

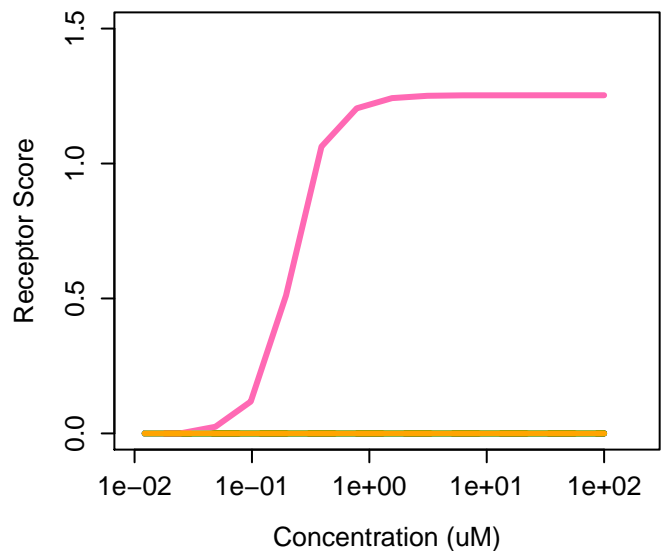

69655-05-6 : 2',3'-Dideoxyinosine

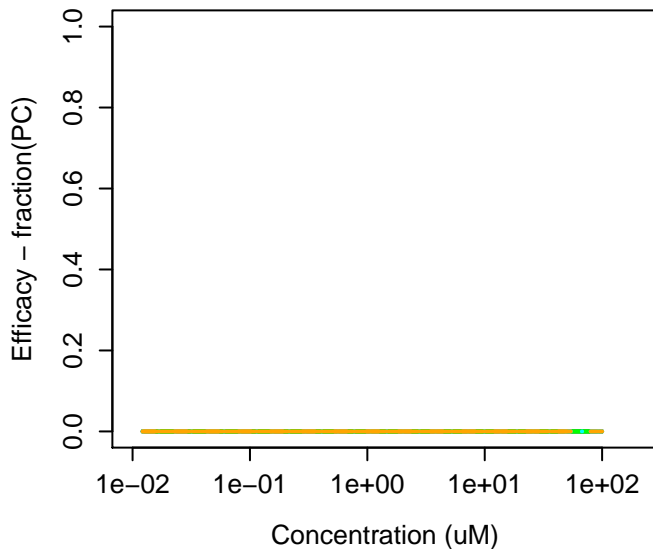

69655-05-6 : 2',3'-Dideoxyinosine  
Agonist: 0 Antagonist: 0



69-65-8 : D-Mannitol

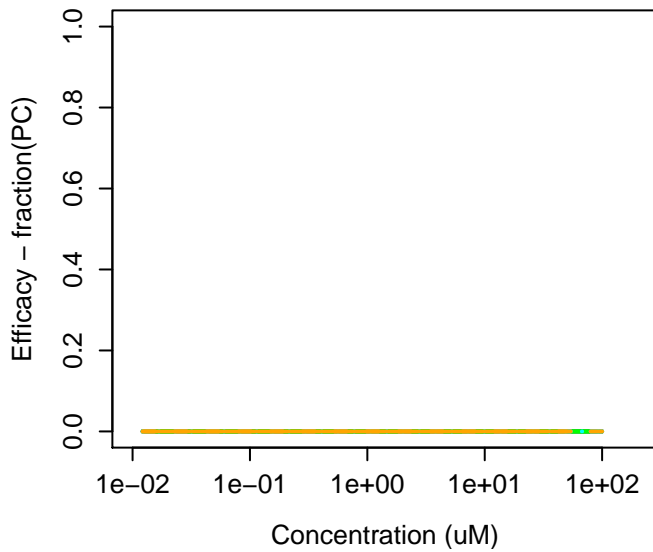

69-65-8 : D-Mannitol  
Agonist: 0 Antagonist: 0



69-72-7 : Salicylic acid

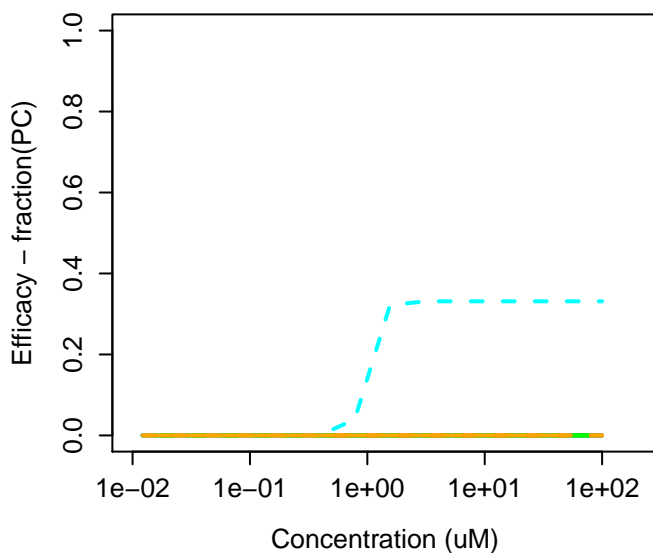

69-72-7 : Salicylic acid  
Agonist: 0 Antagonist: 0



**69-74-9 : Cytarabine hydrochloride**

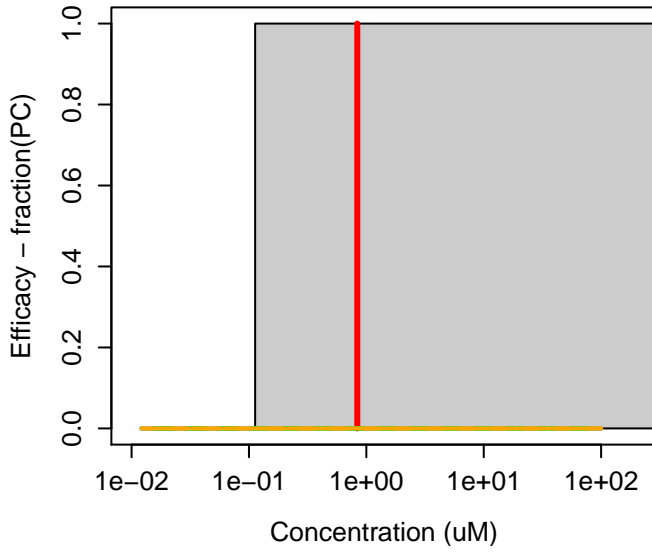

**69-74-9 : Cytarabine hydrochloride  
Agonist: 0 Antagonist: 0**

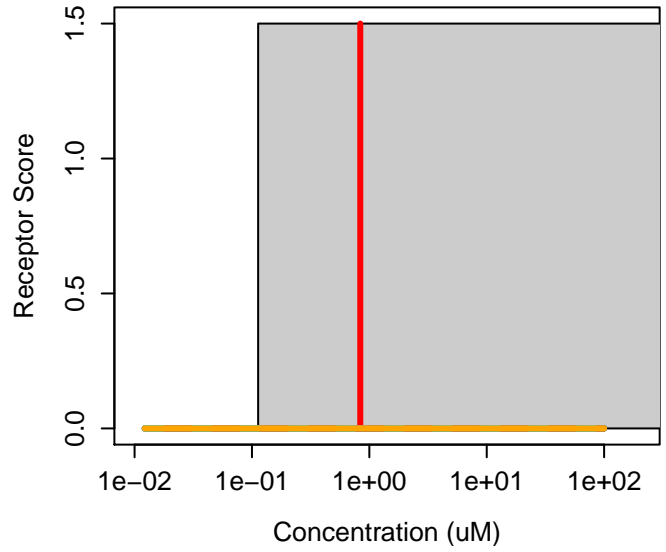

**69806-40-2 : Haloxyfop-methyl**

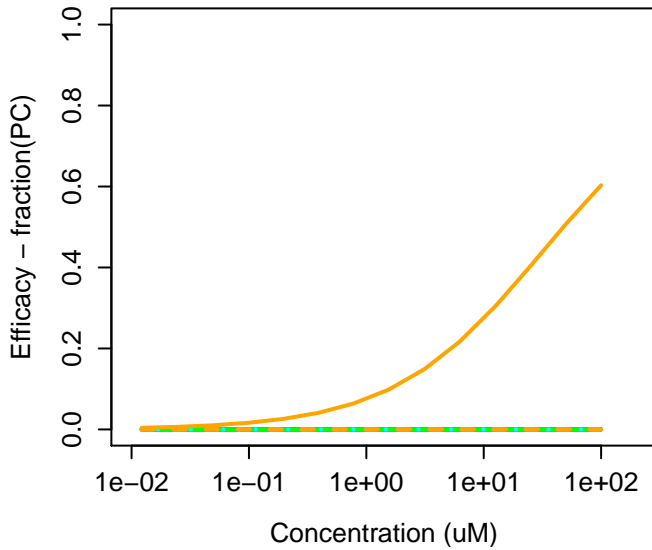

**69806-40-2 : Haloxyfop-methyl  
Agonist: 0 Antagonist: 0**

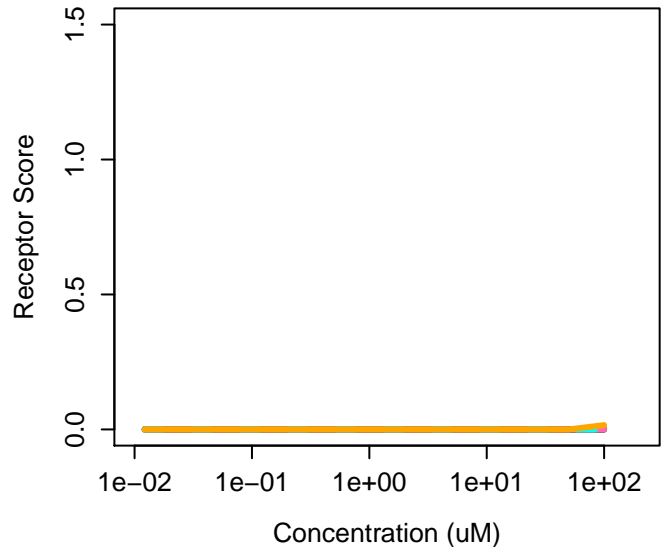

**69806-50-4 : Fluazifop-butyl**

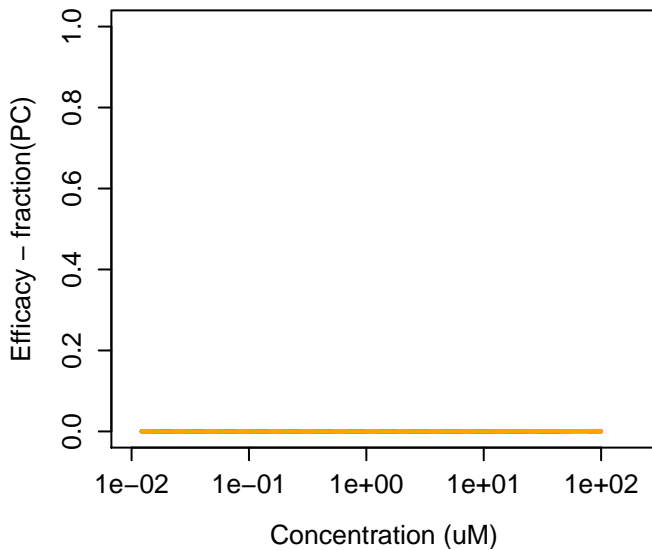

**69806-50-4 : Fluazifop-butyl  
Agonist: 0 Antagonist: 0**



7011-83-8 : Dihydrojasmane lactone



7011-83-8 : Dihydrojasmane lactone  
Agonist: 0 Antagonist: 0



70-55-3 : 4-Toluenesulfonamide



70-55-3 : 4-Toluenesulfonamide  
Agonist: 0 Antagonist: 0



705-60-2 : (2-Nitro-1-propenyl)benzene

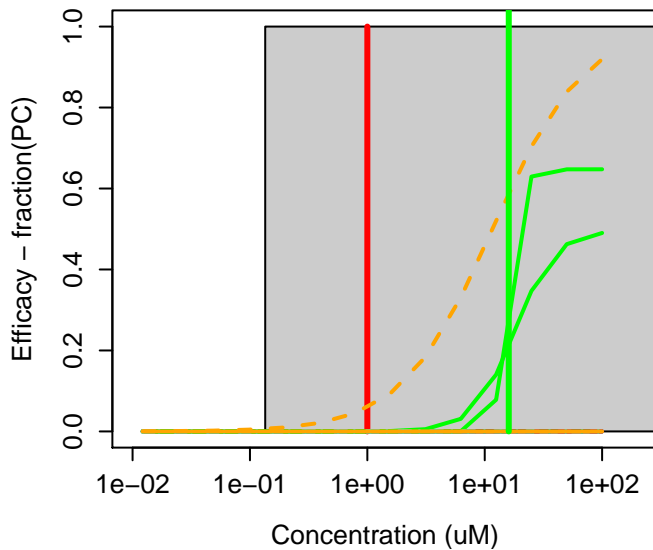

705-60-2 : (2-Nitro-1-propenyl)benzene  
Agonist: 0 Antagonist: 0.15

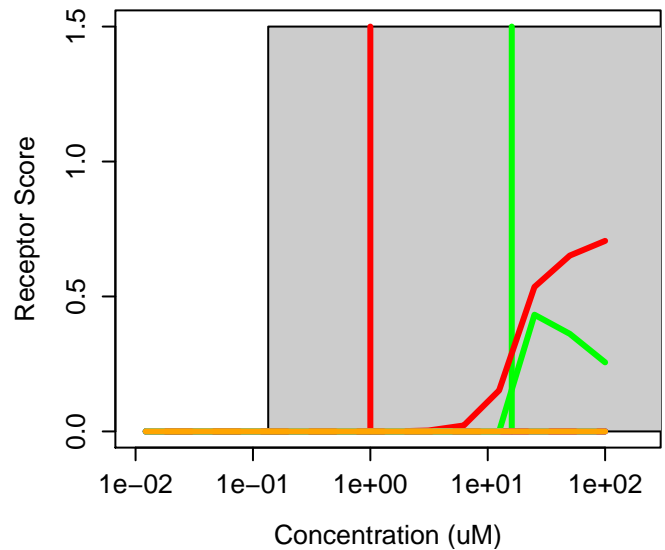

**70568-60-4 : 4-Butylcyclohexanol**



**70568-60-4 : 4-Butylcyclohexanol  
Agonist: 0 Antagonist: 0**



**706-14-9 : gamma-Decanolactone**



**706-14-9 : gamma-Decanolactone  
Agonist: 0 Antagonist: 0**



**7080-50-4 : Chloramine-T trihydrate**

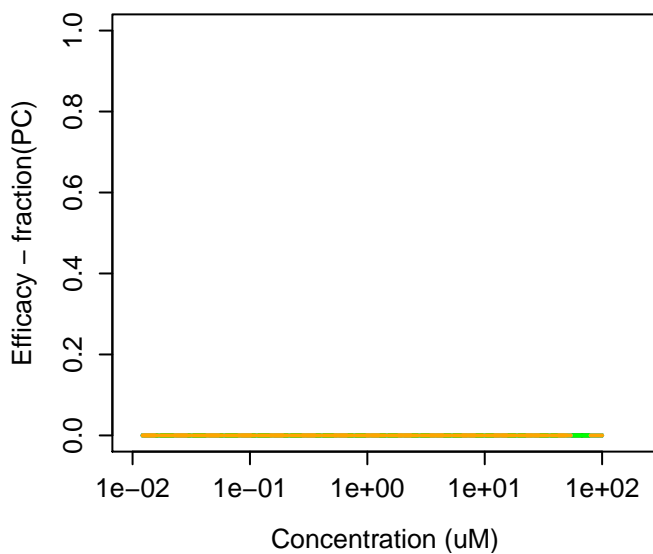

**7080-50-4 : Chloramine-T trihydrate  
Agonist: 0 Antagonist: 0**



709-98-8 : Propanil

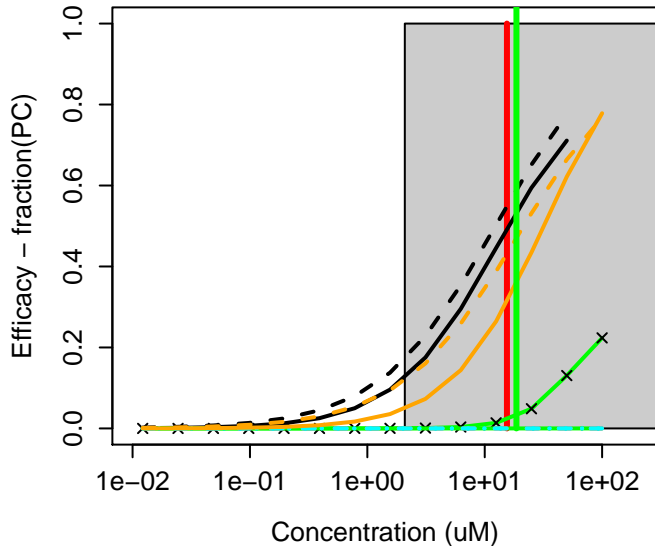

709-98-8 : Propanil  
Agonist: 0 Antagonist: 0.34

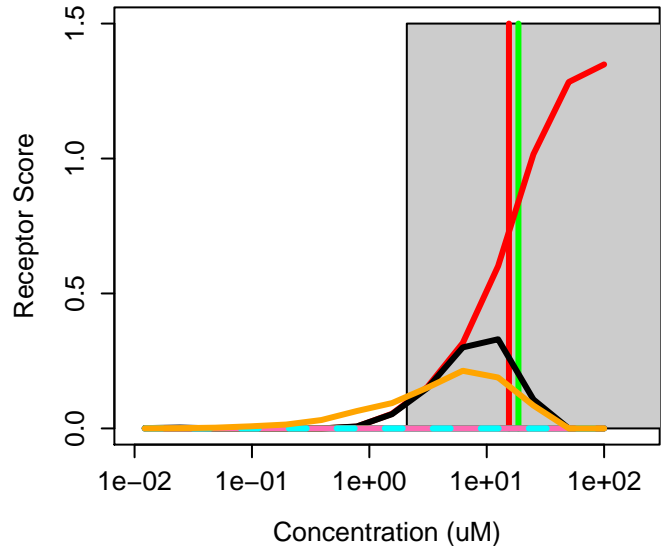

71-23-8 : 1-Propanol



71-23-8 : 1-Propanol  
Agonist: 0 Antagonist: 0



712-50-5 : Cyclohexylphenylketone

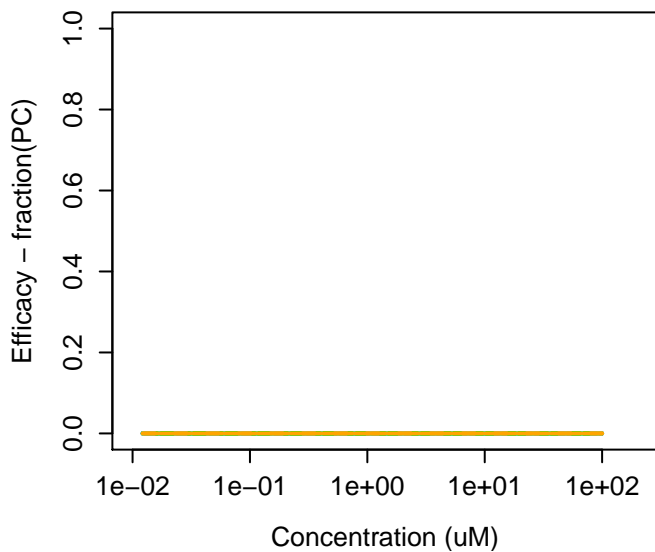

712-50-5 : Cyclohexylphenylketone  
Agonist: 0 Antagonist: 0





71283-80-2 : Fenoxaprop-P-ethyl

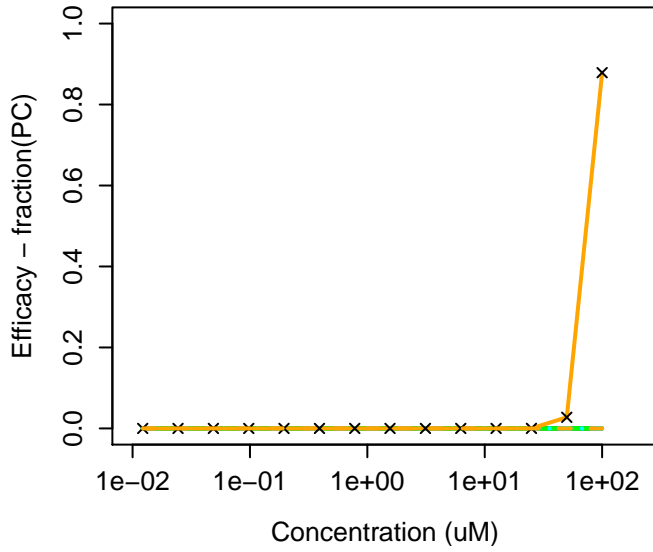

71283-80-2 : Fenoxaprop-P-ethyl  
Agonist: 0 Antagonist: 0



71526-07-3 : MON-4660

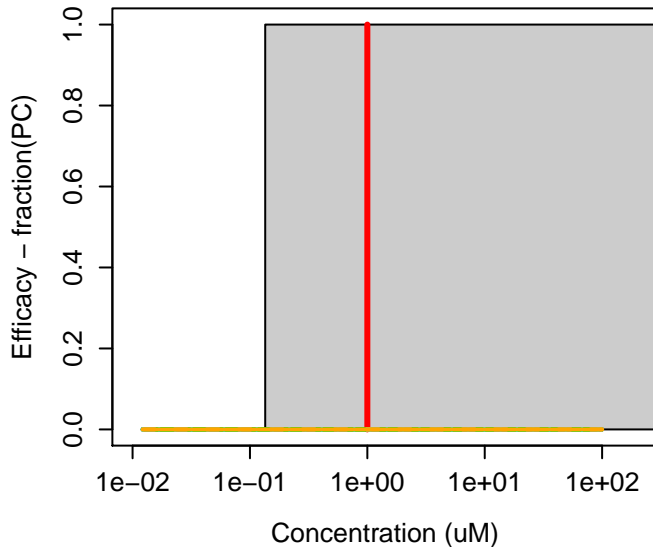

71526-07-3 : MON-4660  
Agonist: 0 Antagonist: 0

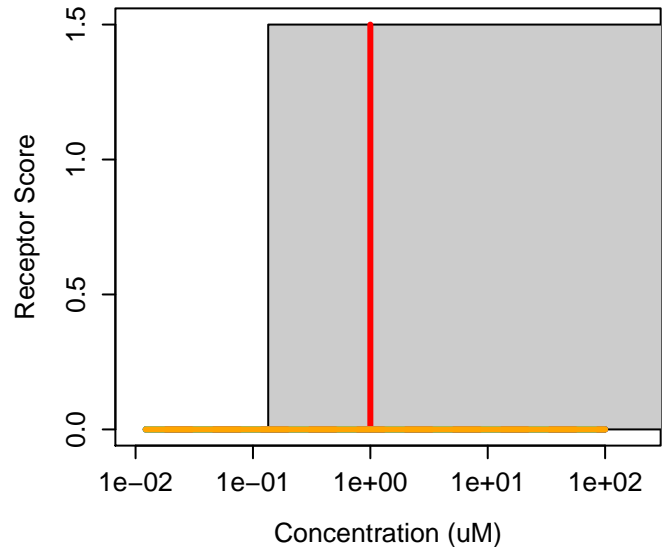

7173-51-5 : Didecyldimethylammonium chloride

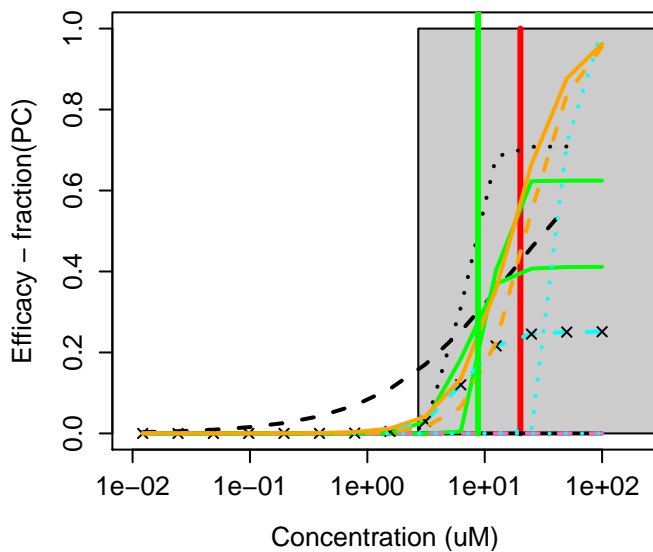

7173-51-5 : Didecyldimethylammonium chloride  
Agonist: 0.018 Antagonist: 0.4

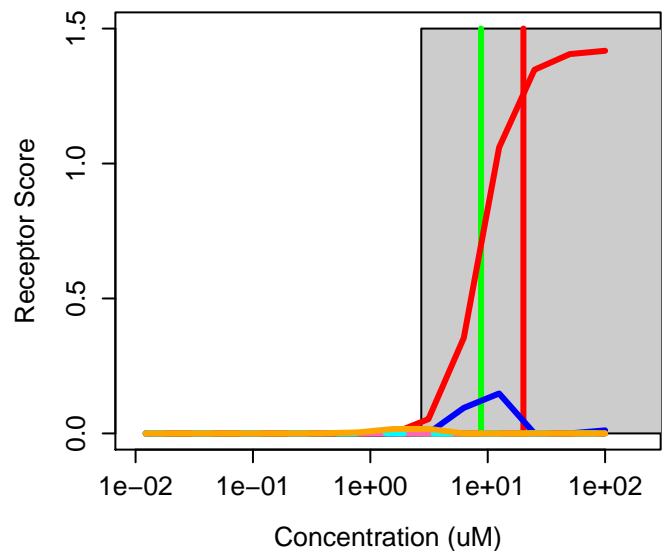

71751-41-2 : Abamectin

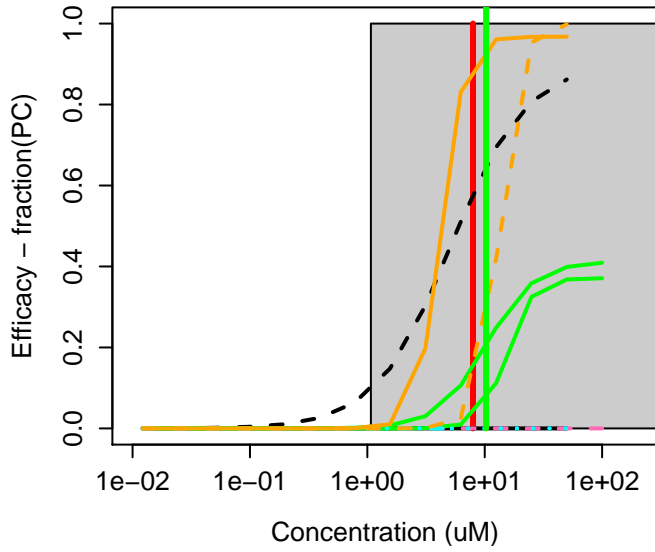

71751-41-2 : Abamectin  
Agonist: 0 Antagonist: 0.39

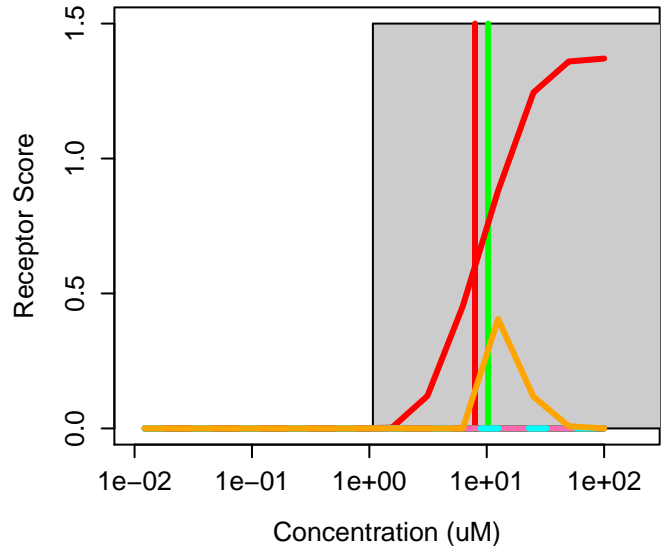

717-74-8 : 1,3,5-Triisopropylbenzene



717-74-8 : 1,3,5-Triisopropylbenzene  
Agonist: 0 Antagonist: 0



7212-44-4 : Nerolidol

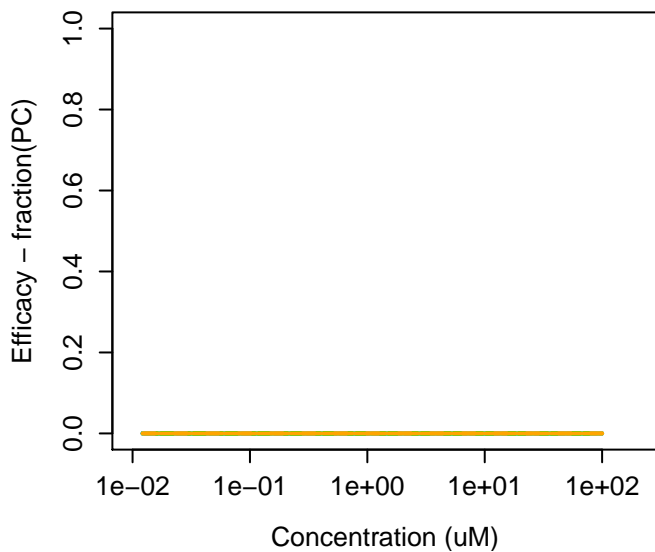

7212-44-4 : Nerolidol  
Agonist: 0 Antagonist: 0



72178-02-0 : Fomesafen



72178-02-0 : Fomesafen  
Agonist: 0 Antagonist: 0



72-20-8 : Endrin

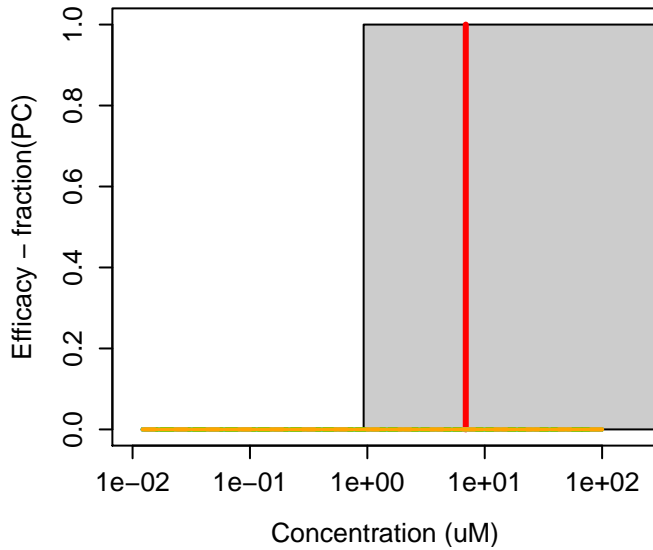

72-20-8 : Endrin  
Agonist: 0 Antagonist: 0

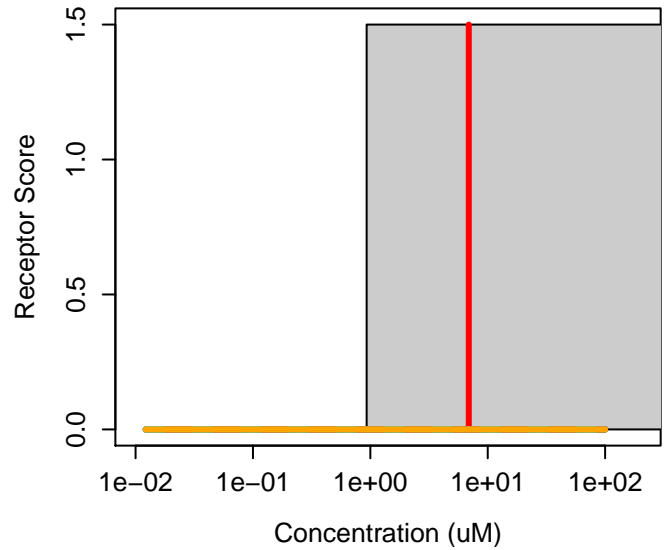

72-33-3 : Mestranol

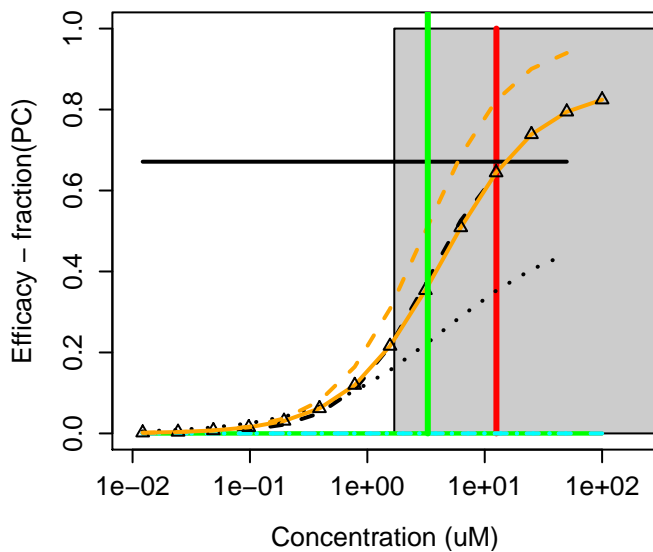

72-33-3 : Mestranol  
Agonist: 0 Antagonist: 0.62

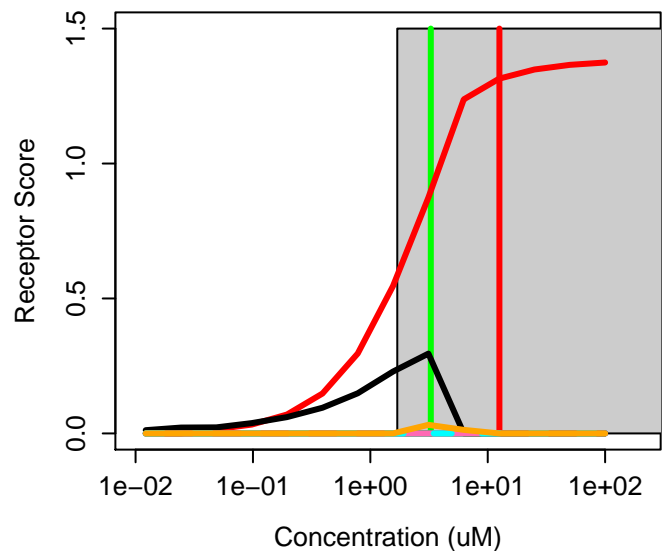

**72-43-5 : Methoxychlor**

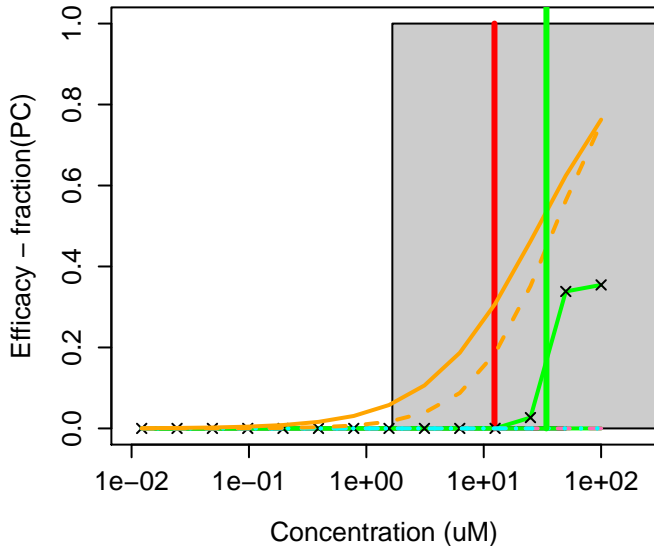

**72-43-5 : Methoxychlor**  
Agonist: 0 Antagonist: 0.043

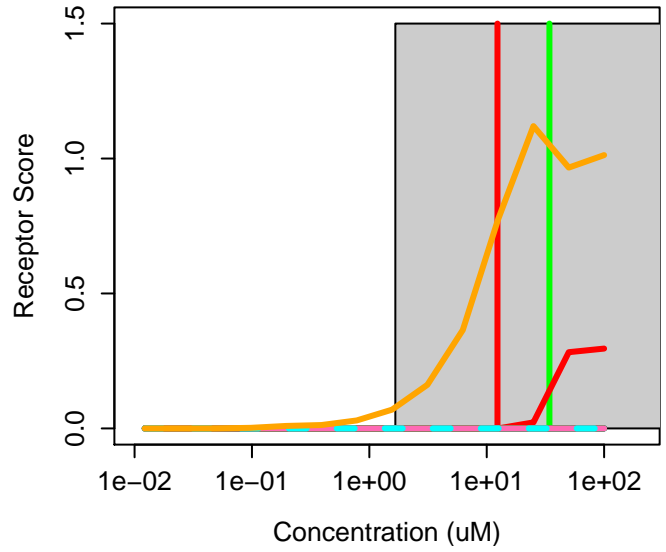

**72490-01-8 : Fenoxycarb**

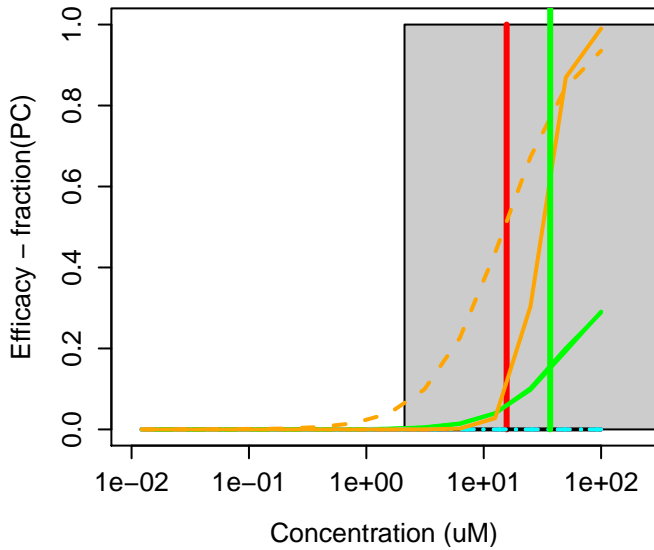

**72490-01-8 : Fenoxycarb**  
Agonist: 0 Antagonist: 0.076

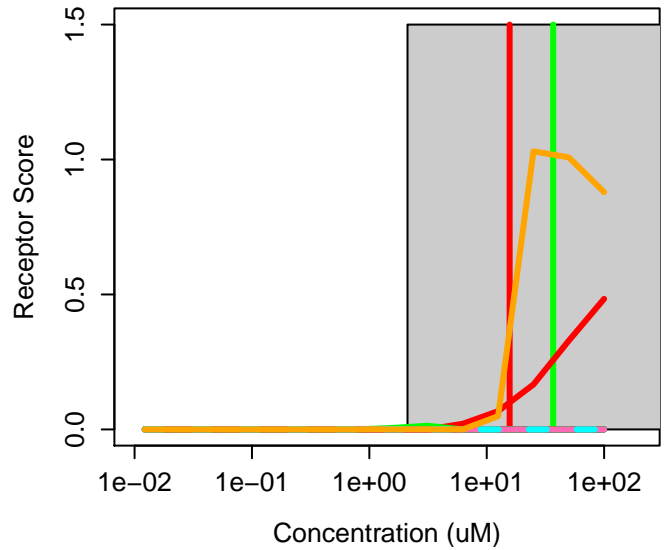

**725228-45-5 : AVE5638**

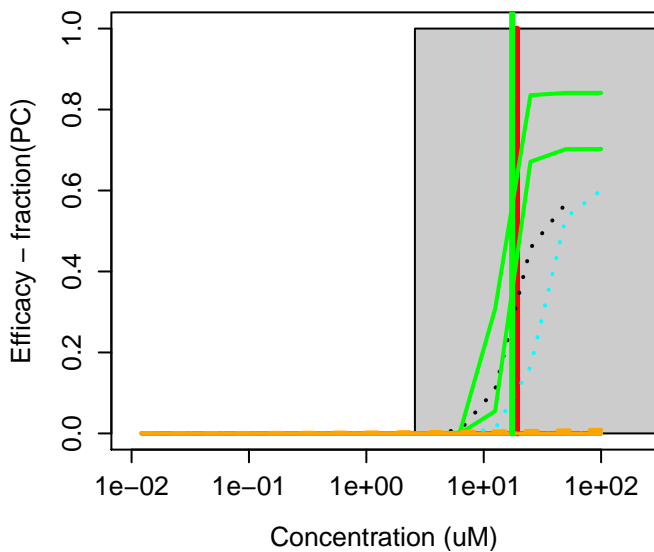

**725228-45-5 : AVE5638**  
Agonist: 0.11 Antagonist: 0.0057

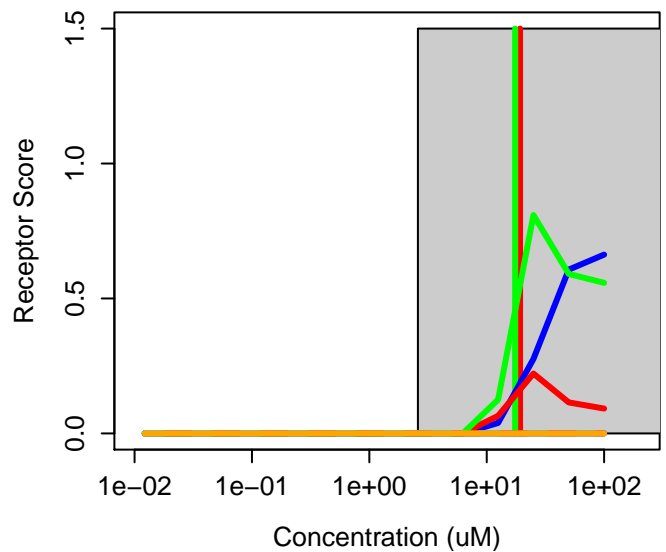

72-54-8 : p,p'-DDD

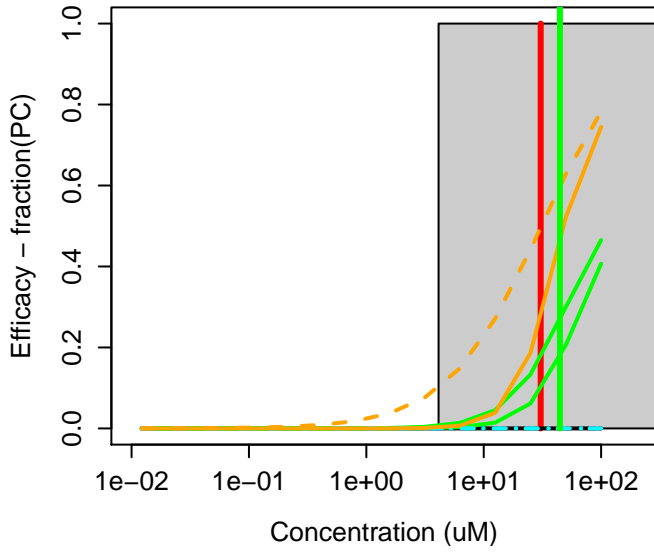

72-54-8 : p,p'-DDD  
Agonist: 0 Antagonist: 0.097

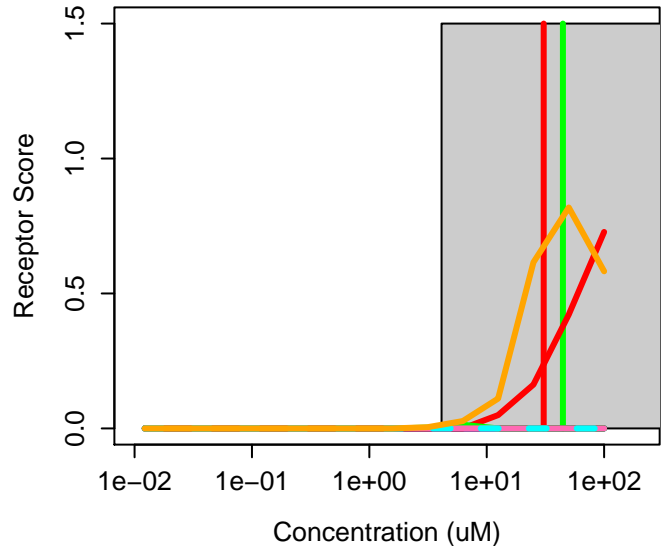

72-55-9 : p,p'-DDE

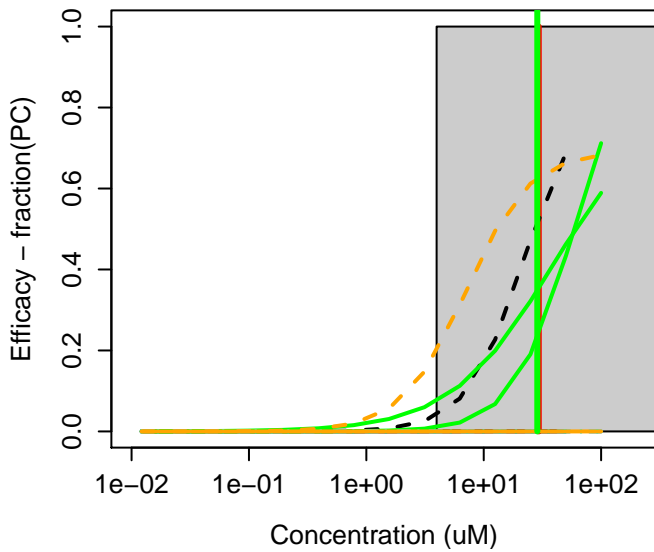

72-55-9 : p,p'-DDE  
Agonist: 0 Antagonist: 0.25

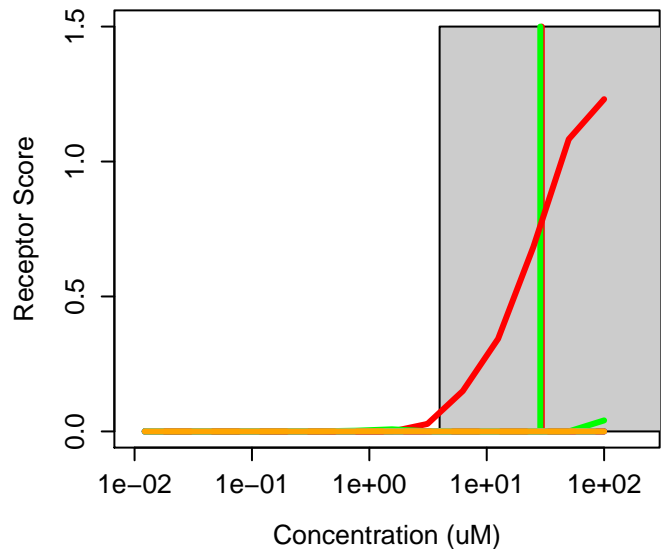

7287-19-6 : Prometryn



7287-19-6 : Prometryn  
Agonist: 0 Antagonist: 0



732-11-6 : Phosmet

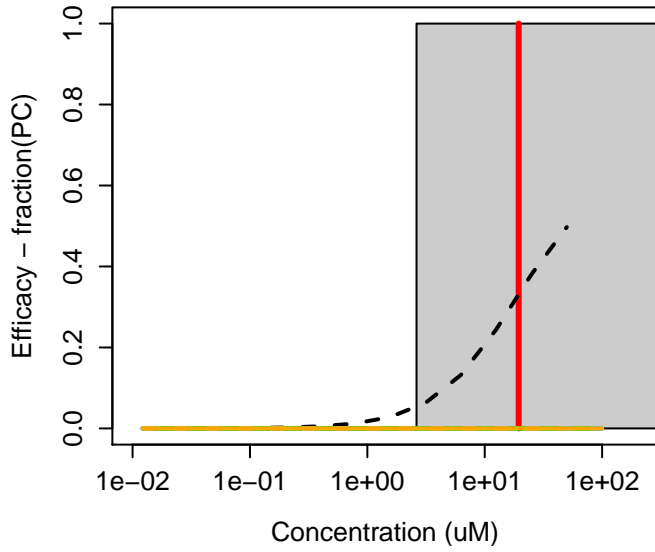

732-11-6 : Phosmet  
Agonist: 0 Antagonist: 0

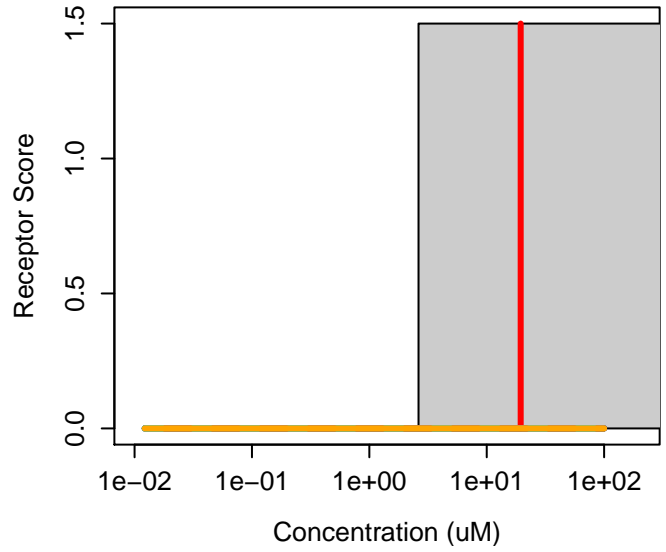

73-22-3 : l-Tryptophan



73-22-3 : l-Tryptophan  
Agonist: 0 Antagonist: 0



732-26-3 : 2,4,6-Tris(tert-butyl)phenol

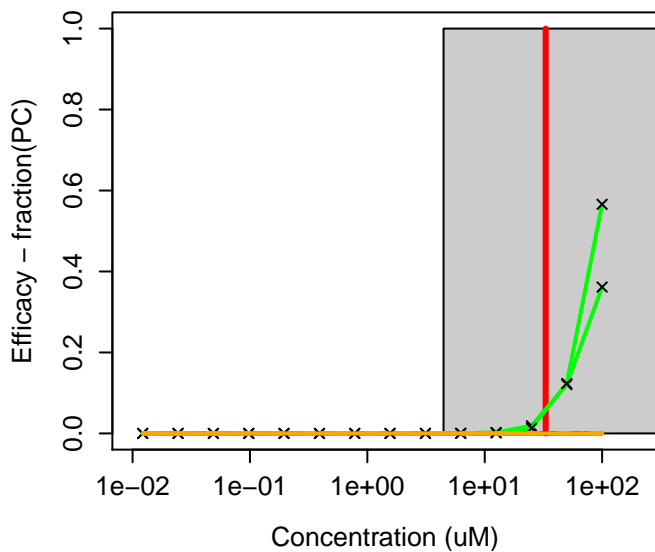

732-26-3 : 2,4,6-Tris(tert-butyl)phenol  
Agonist: 0 Antagonist: 0

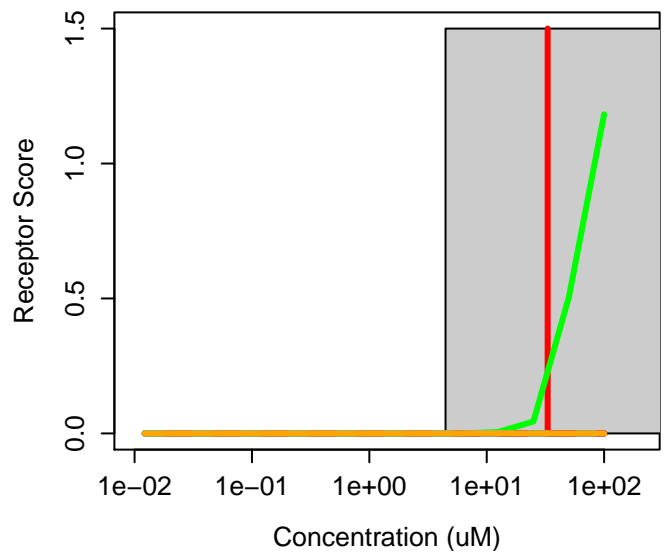

**73-31-4 : Melatonin**



**73-31-4 : Melatonin  
Agonist: 0 Antagonist: 0**



**7378-99-6 : N,N-Dimethyloctylamine**



**7378-99-6 : N,N-Dimethyloctylamine  
Agonist: 0 Antagonist: 0**



**7398-69-8 : Dimethyldiallylammonium chloride**



**7398-69-8 : Dimethyldiallylammonium chloride  
Agonist: 0 Antagonist: 0**



74051-80-2 : Sethoxydim



74051-80-2 : Sethoxydim  
Agonist: 0 Antagonist: 0



74115-24-5 : Clofentezine

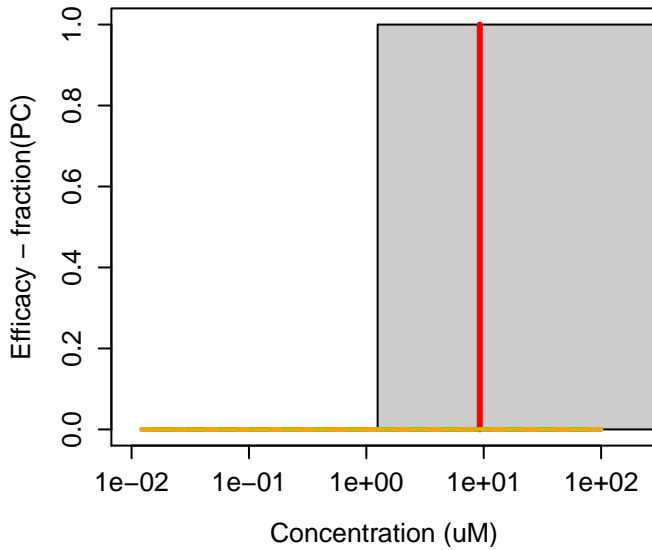

74115-24-5 : Clofentezine  
Agonist: 0 Antagonist: 0

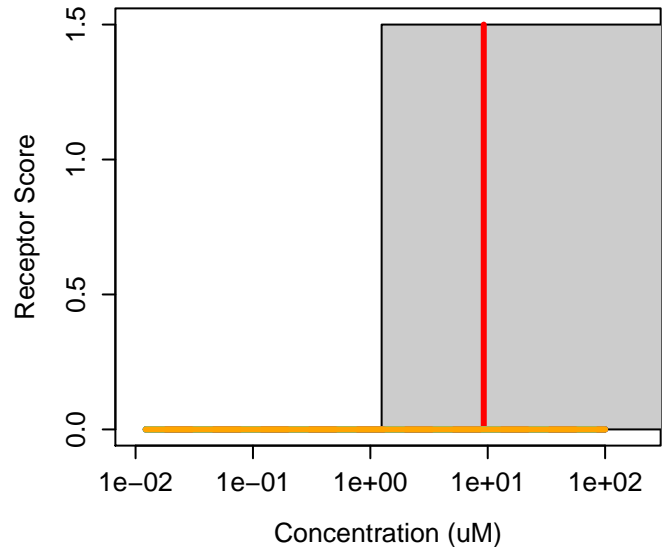

741-58-2 : Bensulide

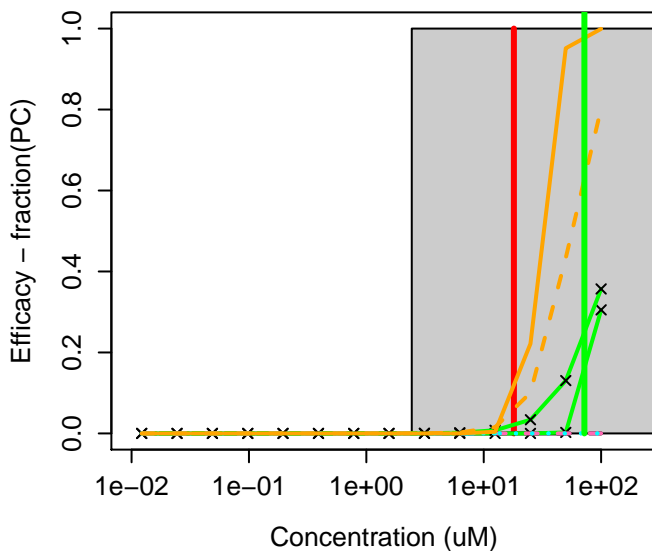

741-58-2 : Bensulide  
Agonist: 0 Antagonist: 0.049

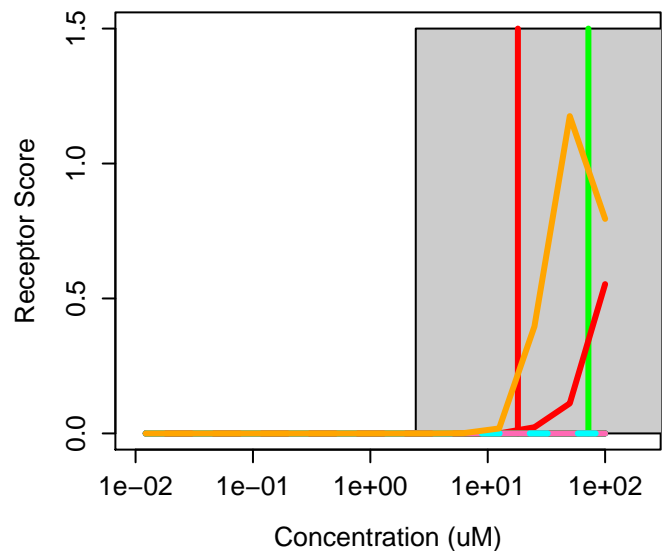



742693-38-5 : SSR504734

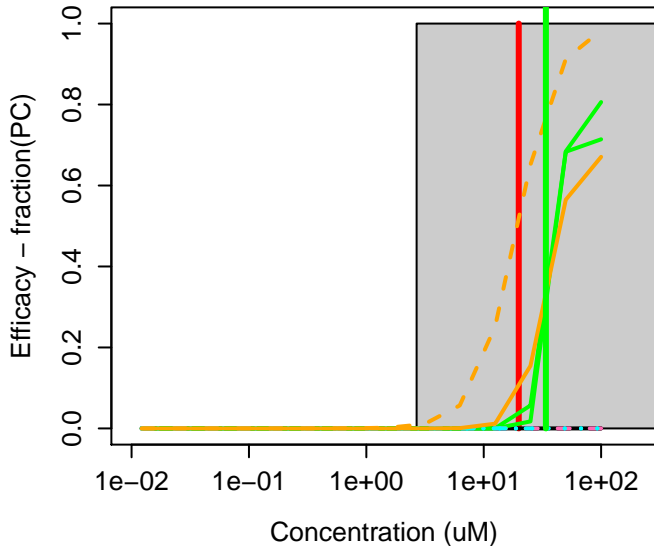

742693-38-5 : SSR504734  
Agonist: 0 Antagonist: 0.18

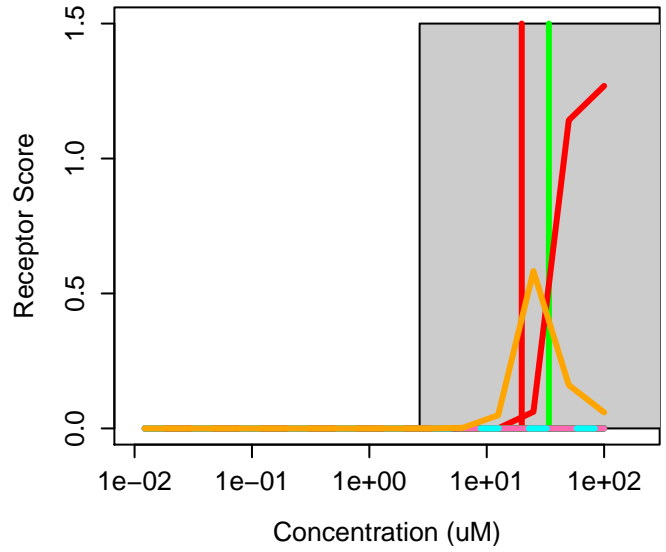

744-45-6 : Diphenyl isophthalate

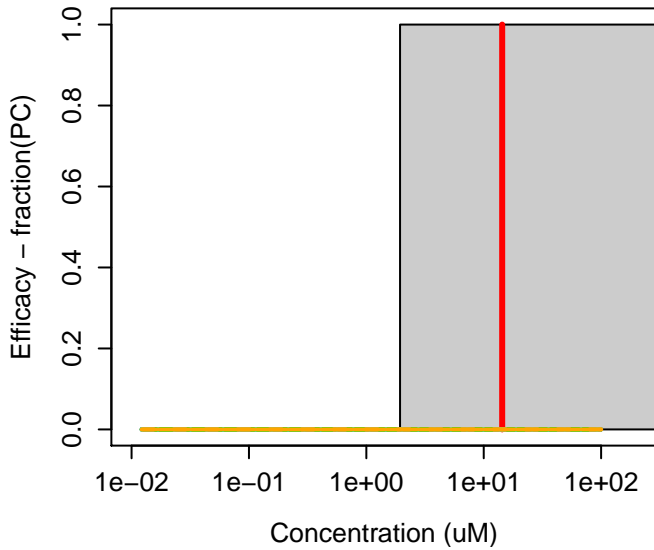

744-45-6 : Diphenyl isophthalate  
Agonist: 0 Antagonist: 0

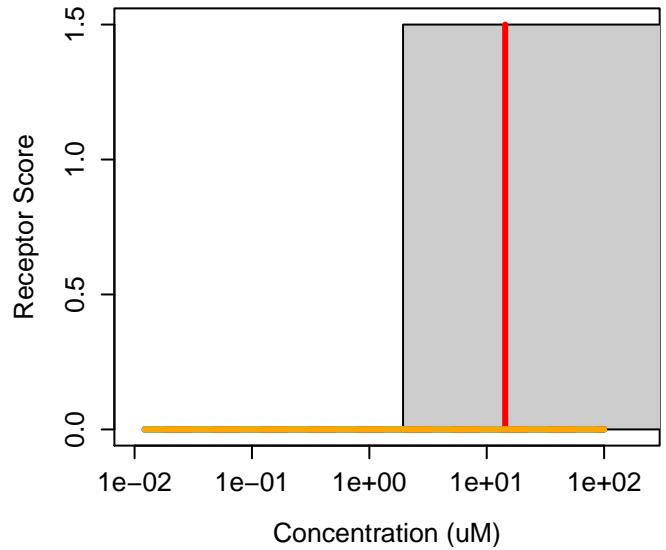

7487-94-7 : Mercuric chloride

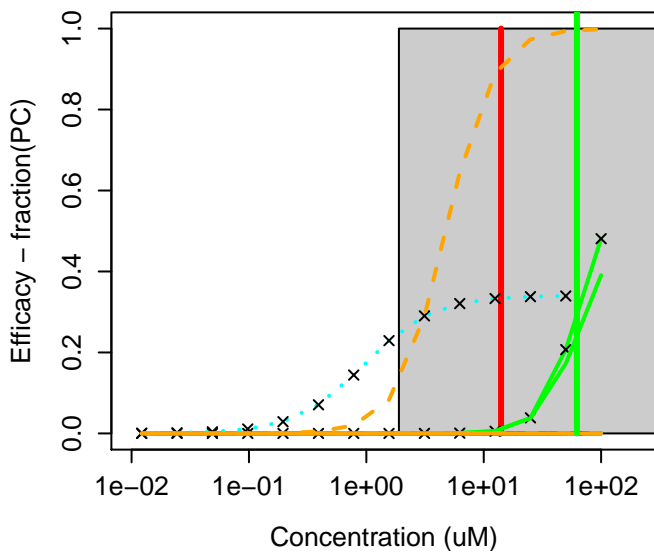

7487-94-7 : Mercuric chloride  
Agonist: 0 Antagonist: 0.067

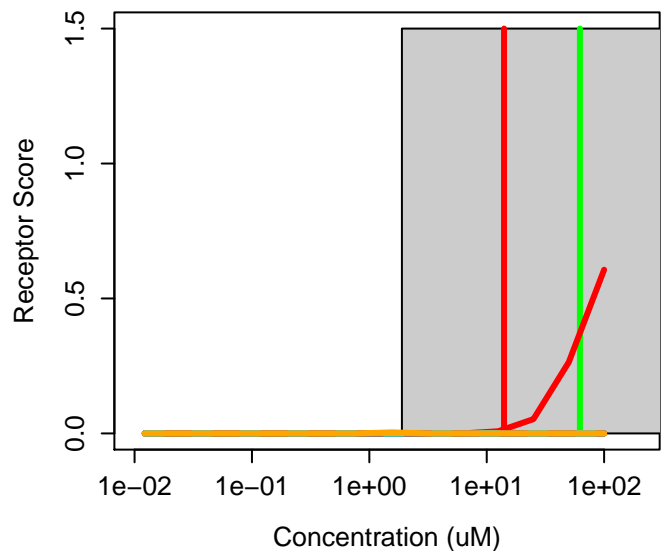

75-12-7 : Formamide

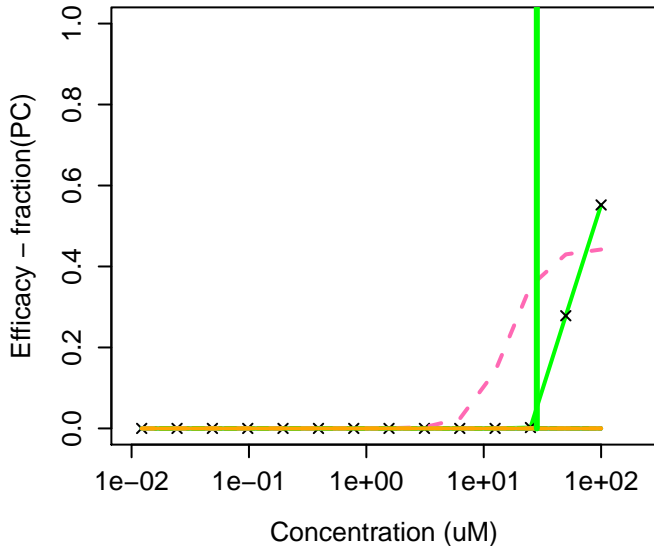

75-12-7 : Formamide  
Agonist: 0.023 Antagonist: 0

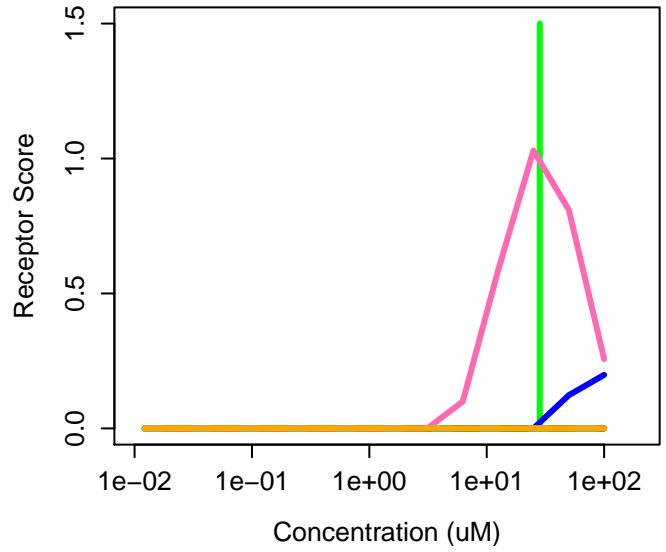

75330-75-5 : Lovastatin

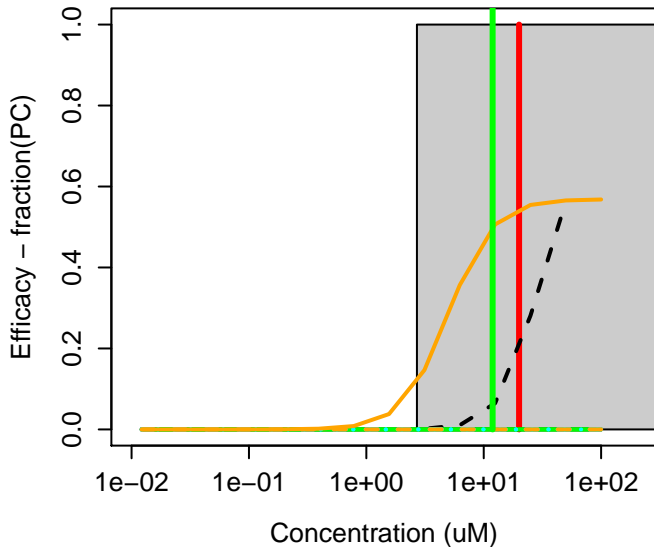

75330-75-5 : Lovastatin  
Agonist: 0 Antagonist: 0.066

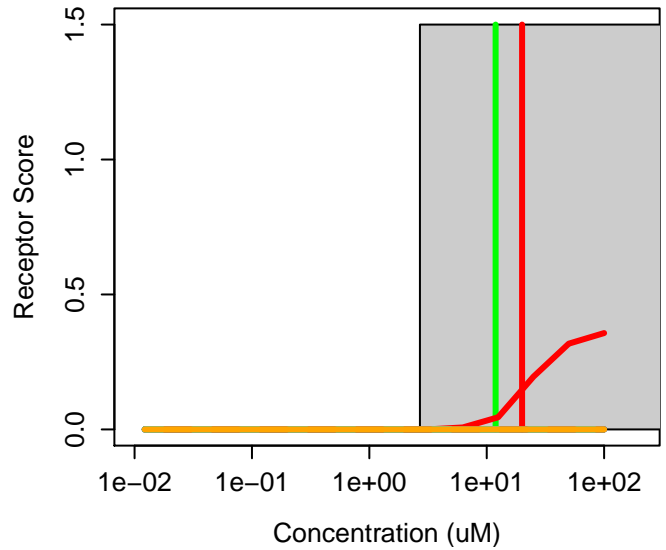

753-73-1 : Dimethyltin dichloride

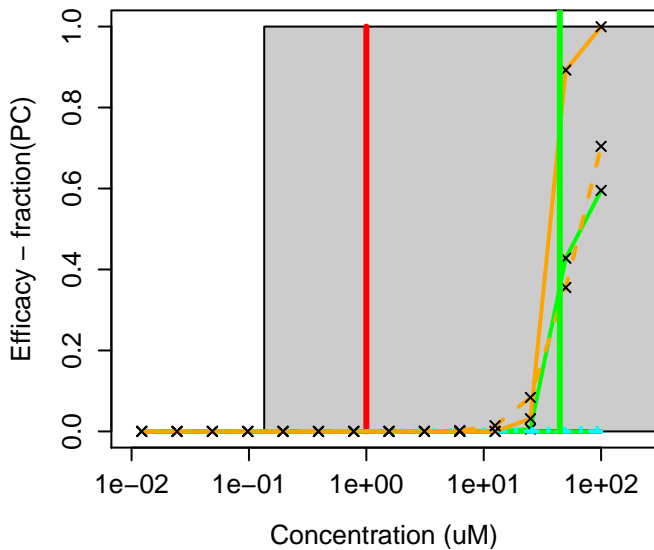

753-73-1 : Dimethyltin dichloride  
Agonist: 0 Antagonist: 0.061

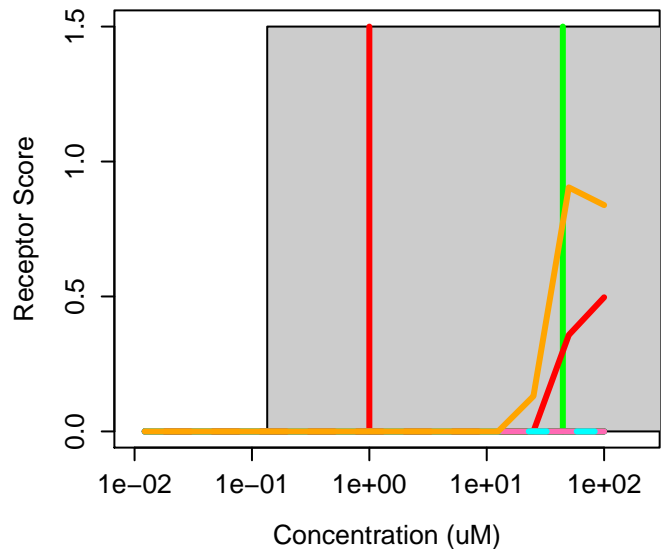

7540-51-4 : (S)-(-)-beta-Citronellol

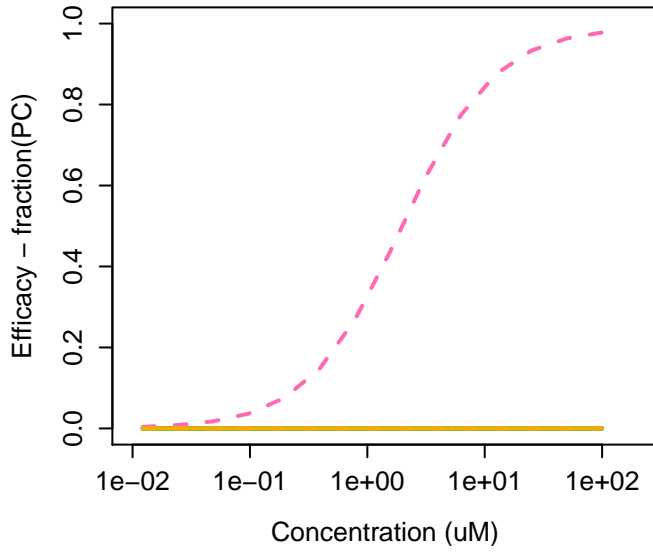

7540-51-4 : (S)-(-)-beta-Citronellol  
Agonist: 0 Antagonist: 0

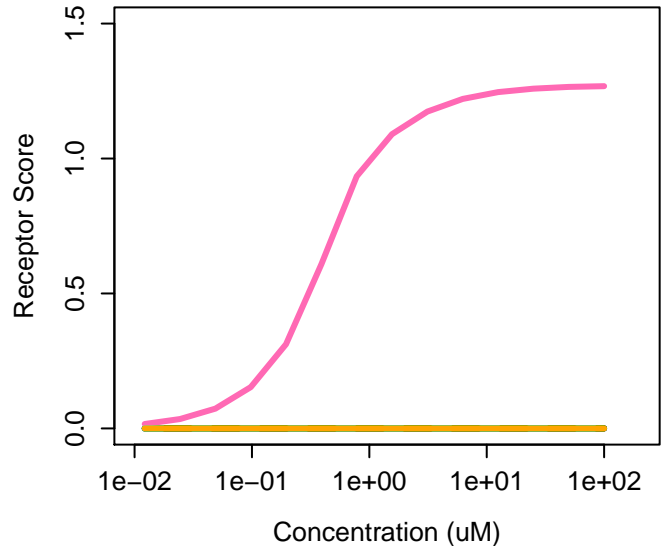

754-91-6 : PFOSA

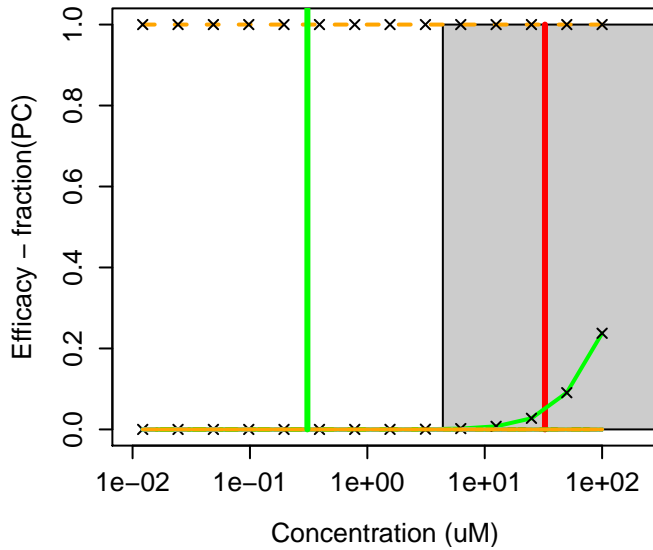

754-91-6 : PFOSA  
Agonist: 0 Antagonist: 0.018

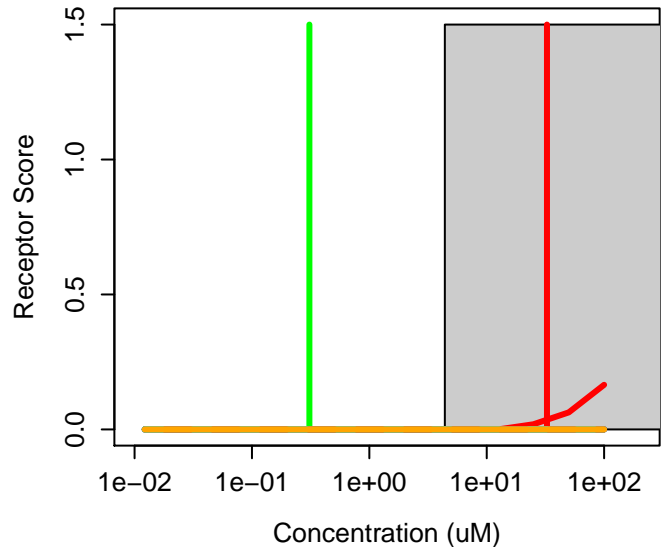

75-50-3 : Trimethylamine

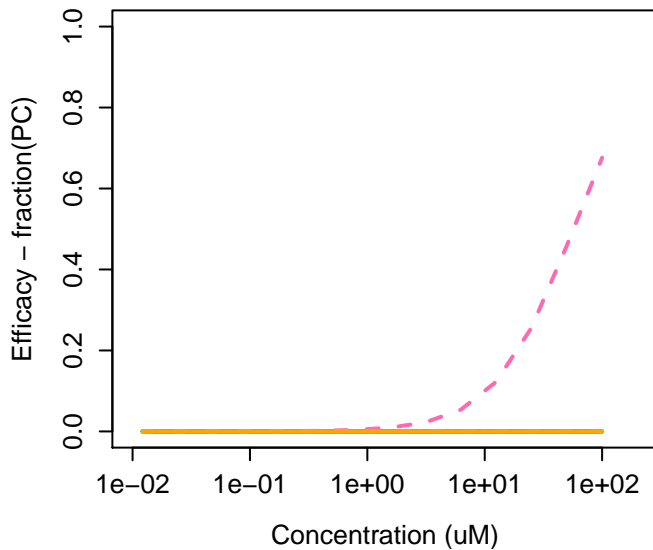

75-50-3 : Trimethylamine  
Agonist: 0 Antagonist: 0

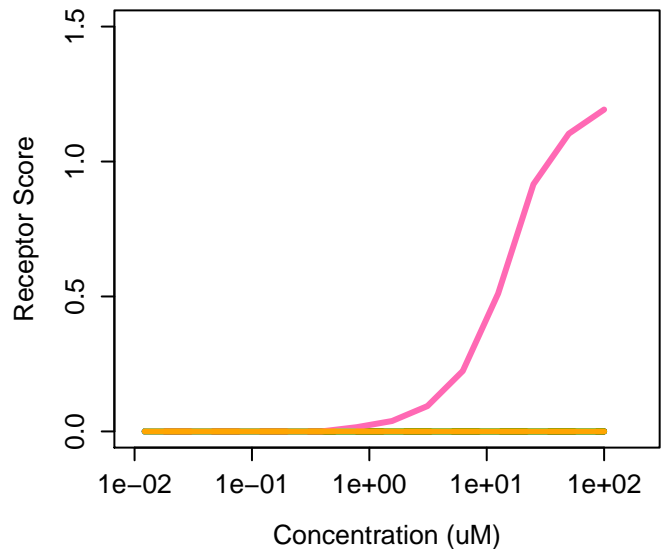

75-60-5 : Dimethylarsinic acid

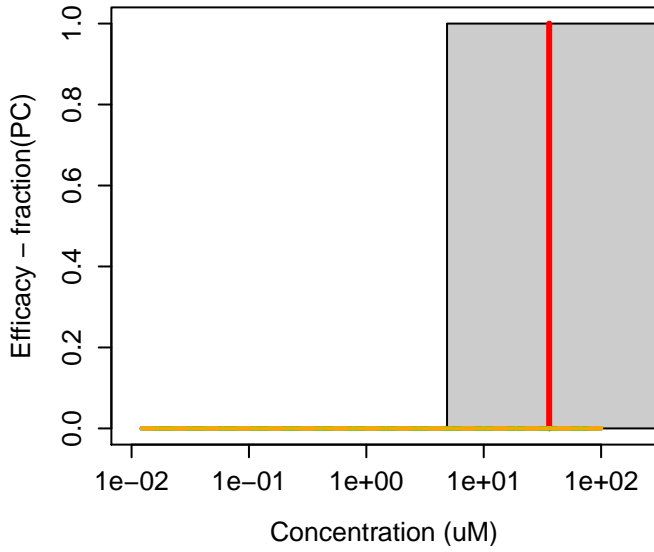

75-60-5 : Dimethylarsinic acid  
Agonist: 0 Antagonist: 0

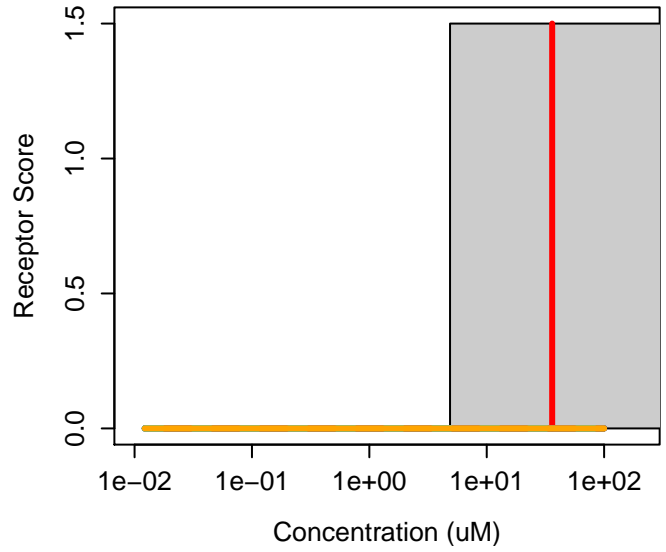

75-64-9 : tert-Butylamine



75-64-9 : tert-Butylamine  
Agonist: 0 Antagonist: 0



756-79-6 : Dimethyl methylphosphonate

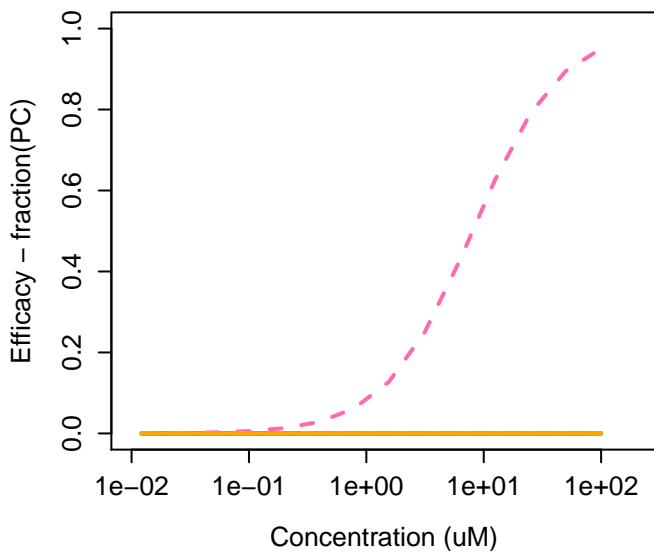

756-79-6 : Dimethyl methylphosphonate  
Agonist: 0.00015 Antagonist: 0

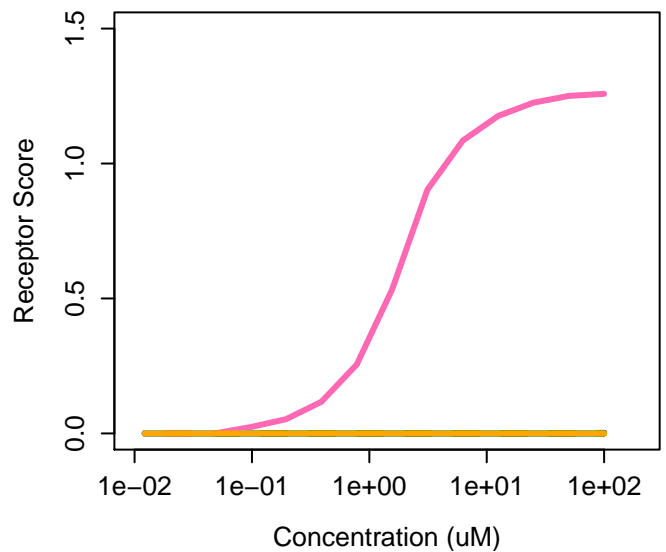

**75-86-5 : 2-Hydroxy-2-methylpropanenitrile**



**75-86-5 : 2-Hydroxy-2-methylpropanenitrile**  
**Agonist: 0 Antagonist: 0**



**75-99-0 : Dalapon**



**75-99-0 : Dalapon**  
**Agonist: 0 Antagonist: 0**



**759-94-4 : EPTC**

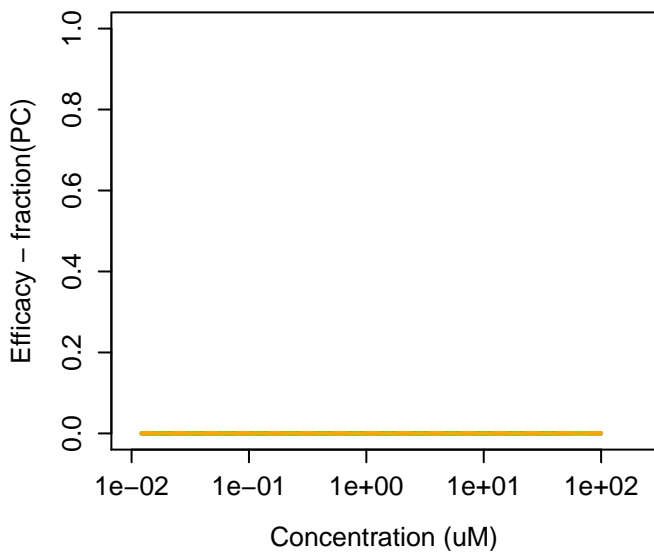

**759-94-4 : EPTC**  
**Agonist: 0 Antagonist: 0**



**760-23-6 : 3,4-Dichloro-1-butene**



**760-23-6 : 3,4-Dichloro-1-butene  
Agonist: 0 Antagonist: 0**



**76-03-9 : Trichloroacetic acid**



**76-03-9 : Trichloroacetic acid  
Agonist: 0 Antagonist: 0**



**762-04-9 : Diethyl phosphite**

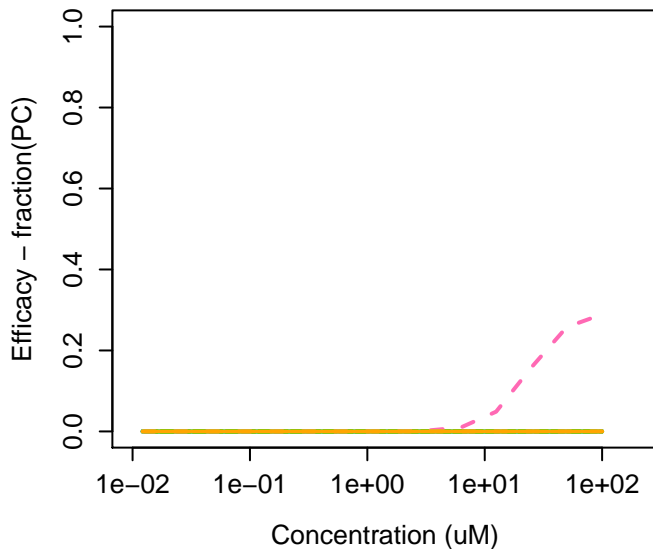

**762-04-9 : Diethyl phosphite  
Agonist: 0 Antagonist: 0**

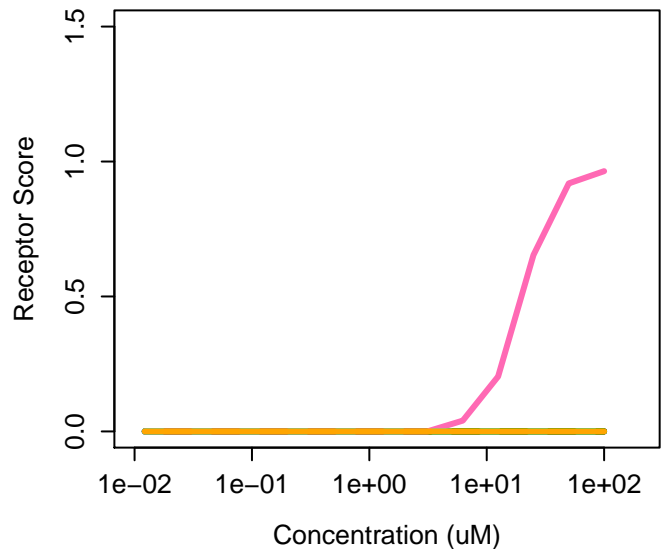

7631-86-9 : Silica

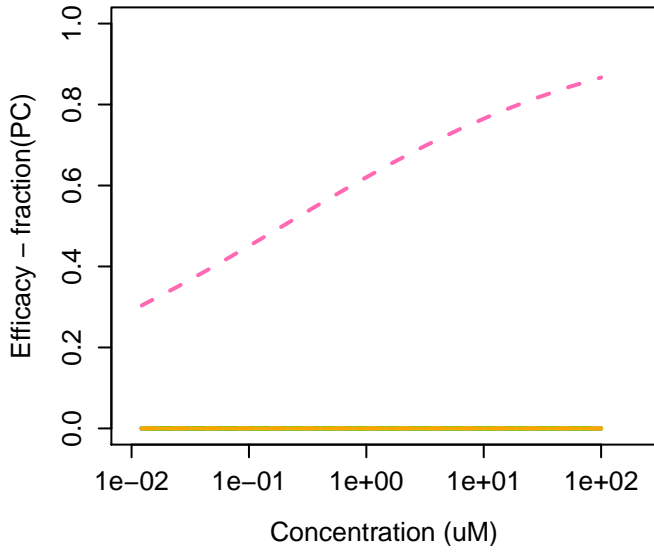

7631-86-9 : Silica  
Agonist: 7.5e-05 Antagonist: 0

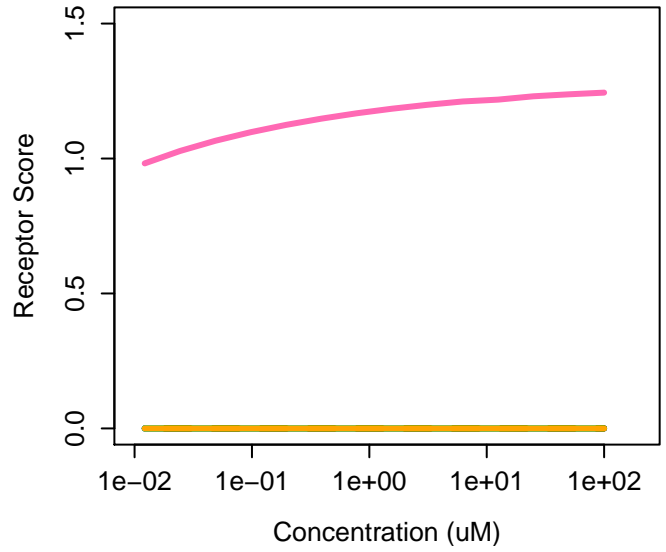

7632-00-0 : Sodium nitrite



7632-00-0 : Sodium nitrite  
Agonist: 0 Antagonist: 0



76-44-8 : Heptachlor

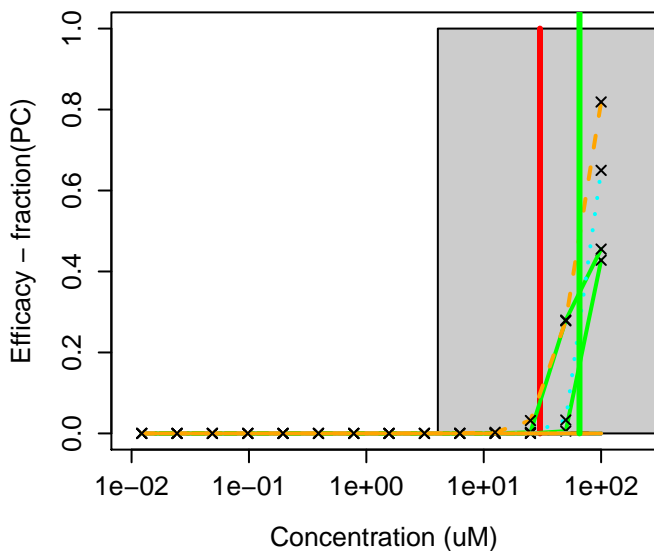

76-44-8 : Heptachlor  
Agonist: 0.011 Antagonist: 0.043

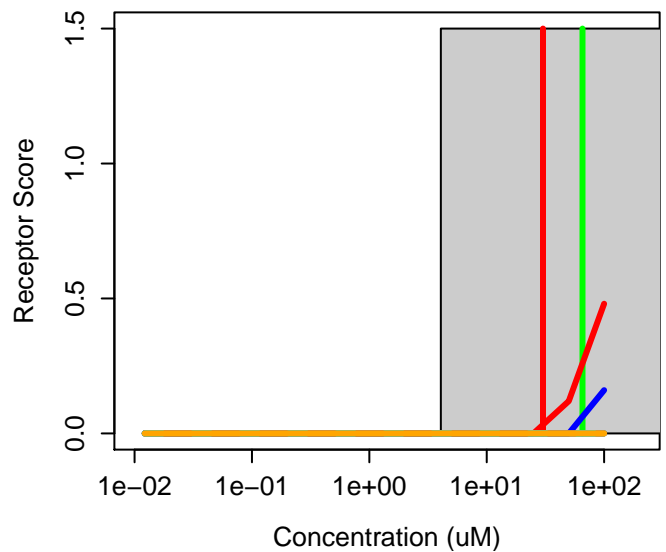

**76-49-3 : Bornyl acetate**



**76-49-3 : Bornyl acetate  
Agonist: 0 Antagonist: 0**



**76578-14-8 : Quizalofop-ethyl**

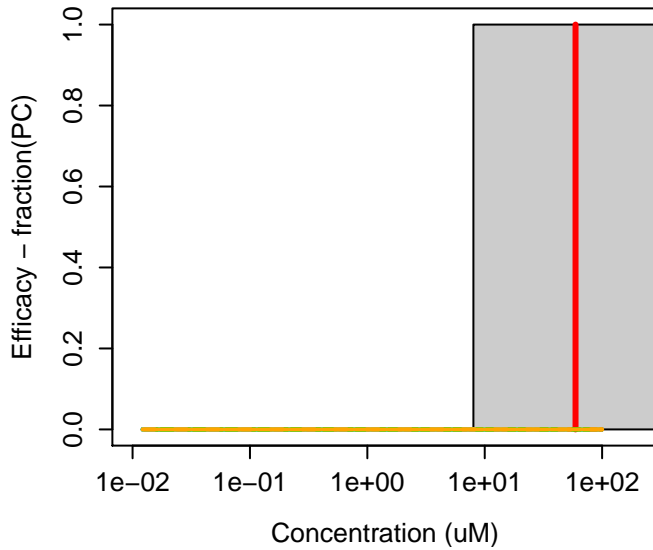

**76578-14-8 : Quizalofop-ethyl  
Agonist: 0 Antagonist: 0**

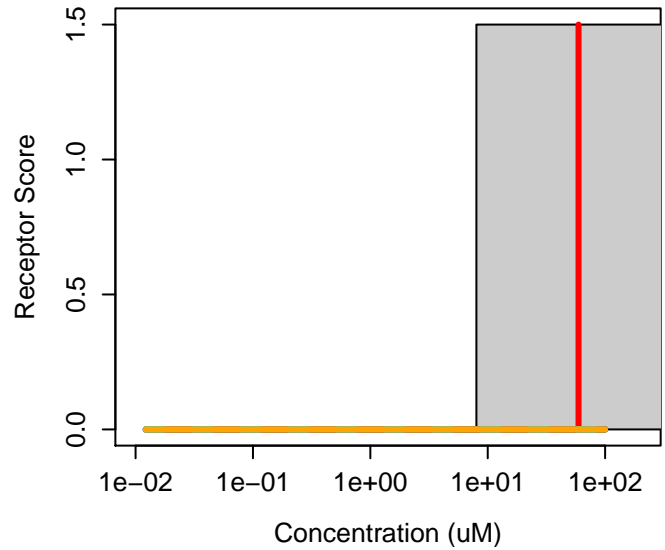

**7659-86-1 : 2-Ethylhexyl sulfanylacetate**



**7659-86-1 : 2-Ethylhexyl sulfanylacetate  
Agonist: 0 Antagonist: 0**





**7664-38-2 : Phosphoric acid**

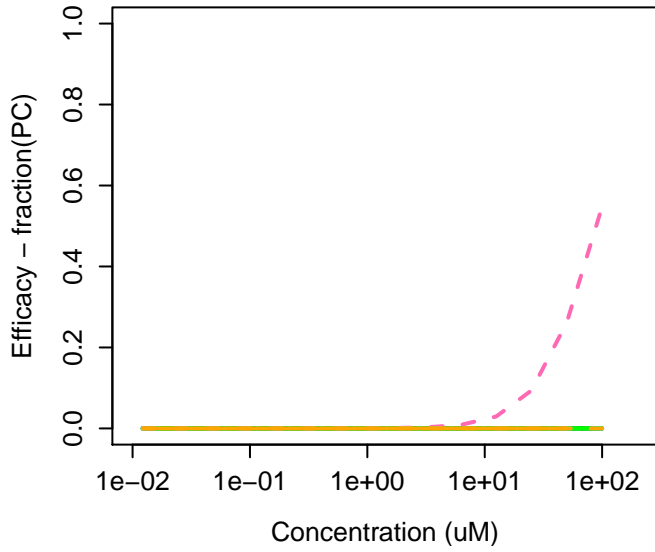

**7664-38-2 : Phosphoric acid**  
**Agonist: 0 Antagonist: 0**

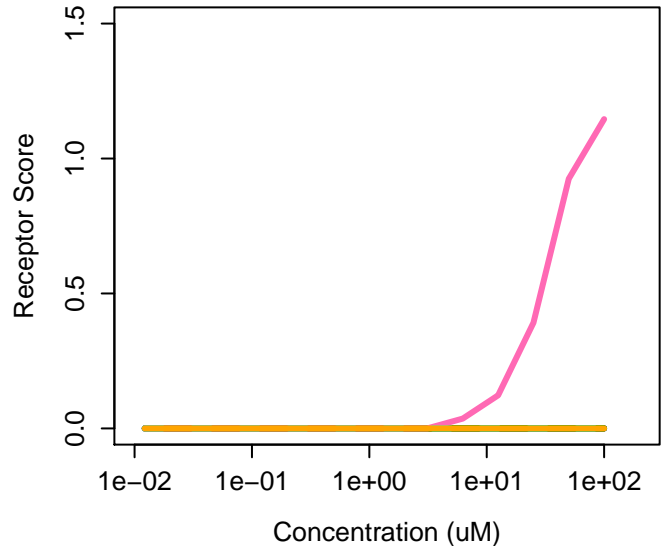

**76738-62-0 : Paclobutrazol**

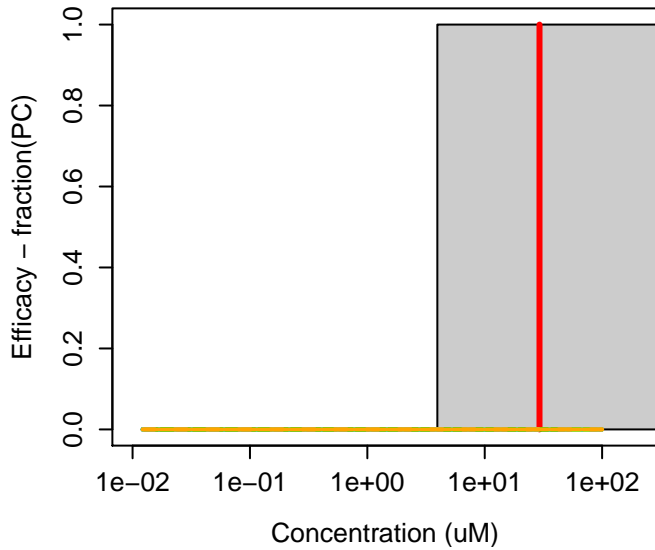

**76738-62-0 : Paclobutrazol**  
**Agonist: 0 Antagonist: 0**

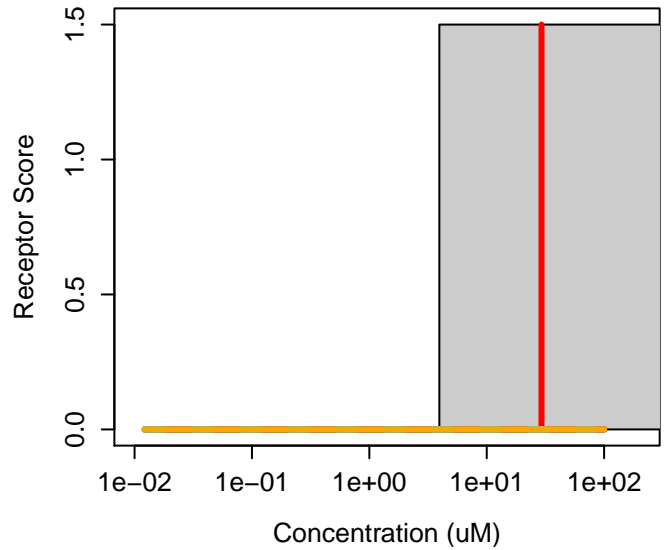

**7681-76-7 : Ronidazole**



**7681-76-7 : Ronidazole**  
**Agonist: 0 Antagonist: 0**



7681-82-5 : Sodium iodide

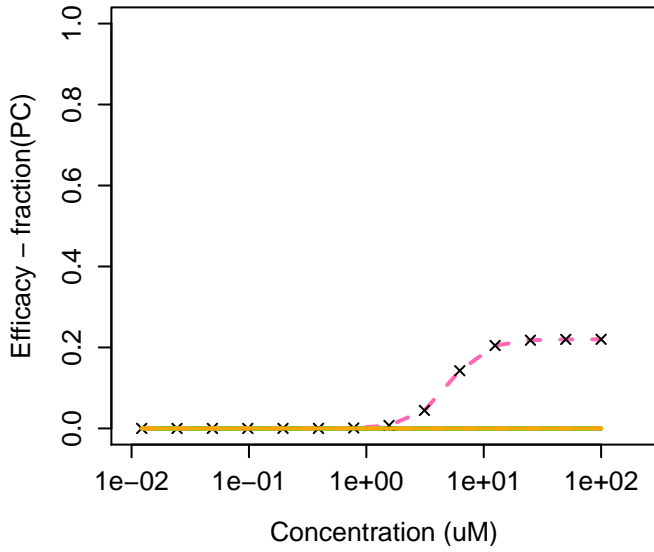

7681-82-5 : Sodium iodide  
Agonist: 0 Antagonist: 0

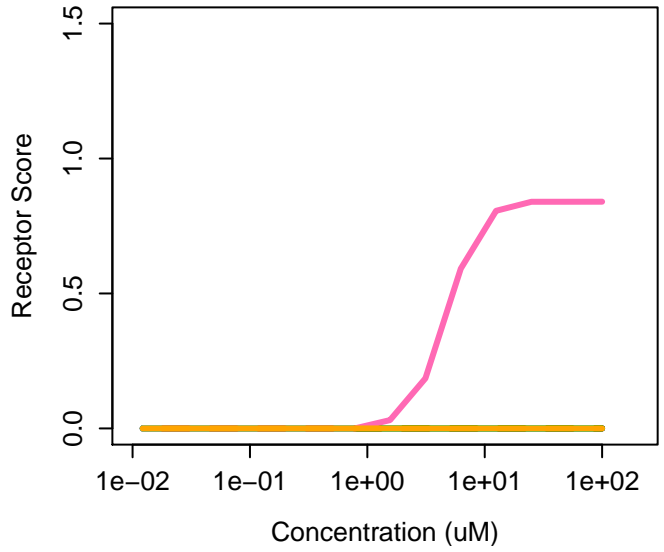

76-87-9 : Triphenyltin hydroxide

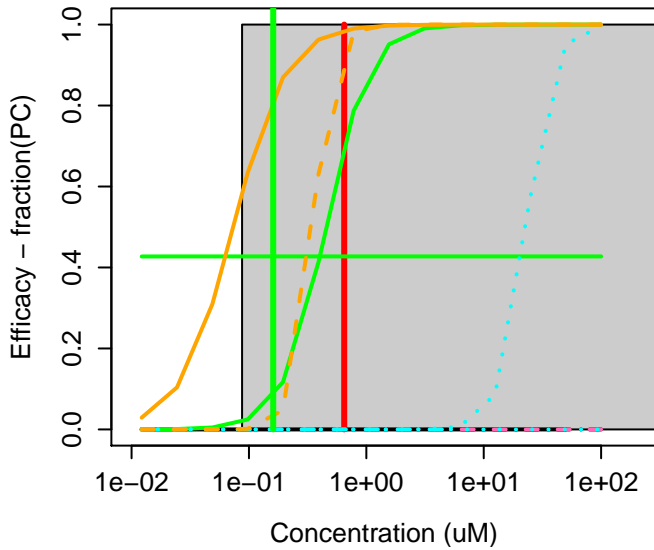

76-87-9 : Triphenyltin hydroxide  
Agonist: 0 Antagonist: 0.79

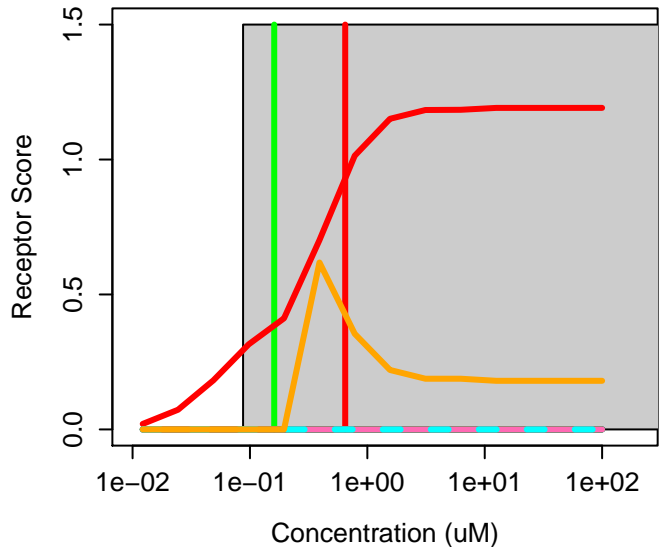

7696-12-0 : Tetramethrin

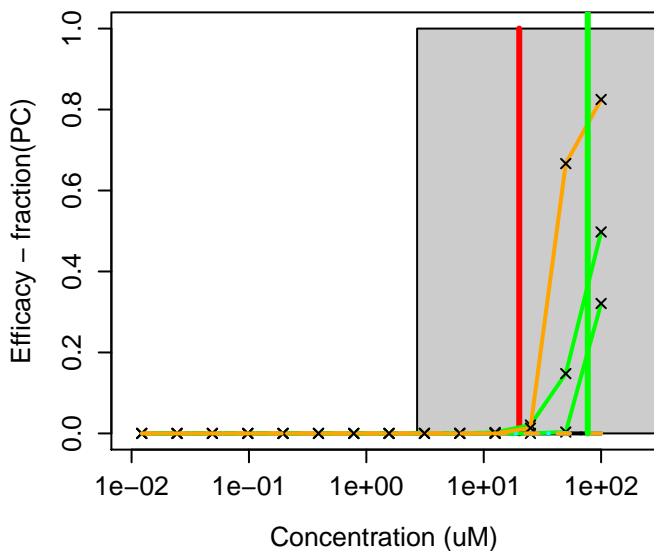

7696-12-0 : Tetramethrin  
Agonist: 0 Antagonist: 0.047

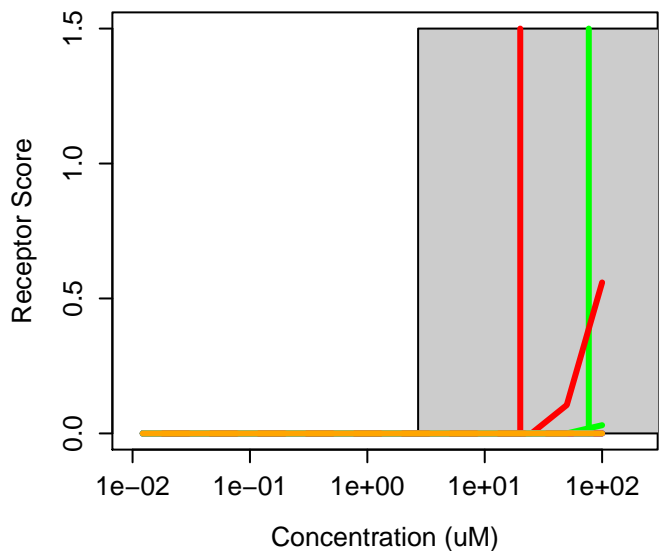

**769-92-6 : 4-tert-Butylaniline**

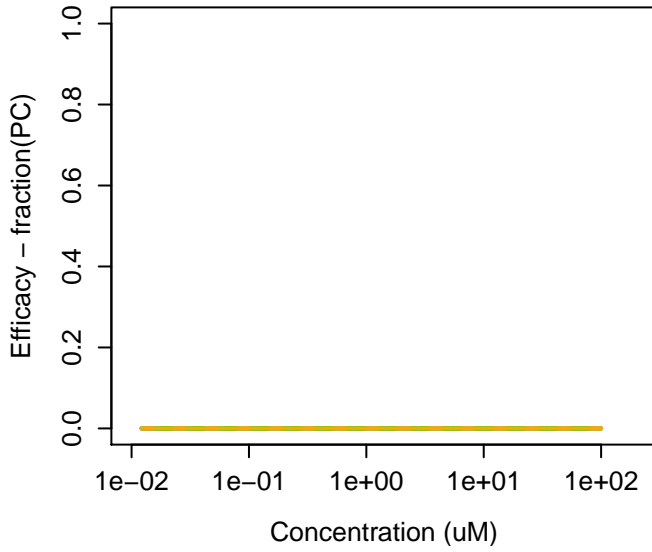

**769-92-6 : 4-tert-Butylaniline**  
**Agonist: 0 Antagonist: 0**



**770-35-4 : 1-Phenoxy-2-propanol**



**770-35-4 : 1-Phenoxy-2-propanol**  
**Agonist: 0 Antagonist: 0**



**77-06-5 : Gibberellic acid**



**77-06-5 : Gibberellic acid**  
**Agonist: 0 Antagonist: 0**



77-09-8 : Phenolphthalein

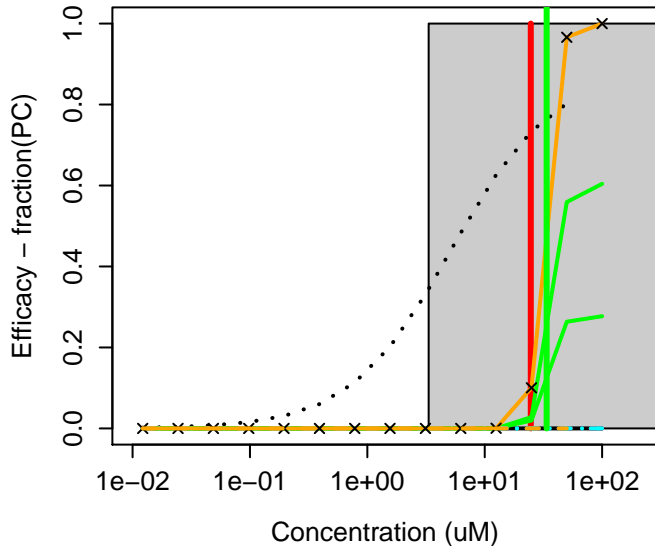

77-09-8 : Phenolphthalein  
Agonist: 0 Antagonist: 0.17

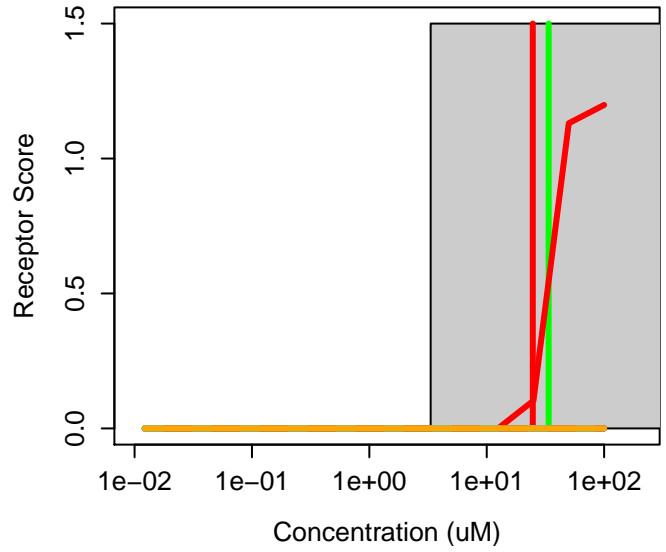

77-40-7 : Bisphenol B

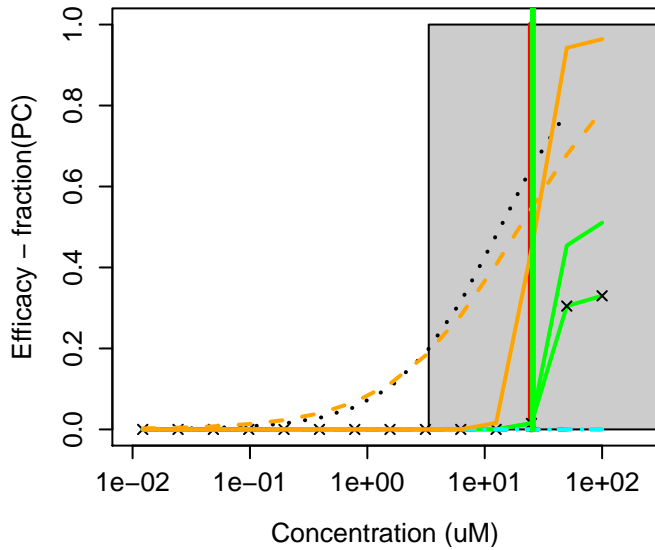

77-40-7 : Bisphenol B  
Agonist: 0 Antagonist: 0.26

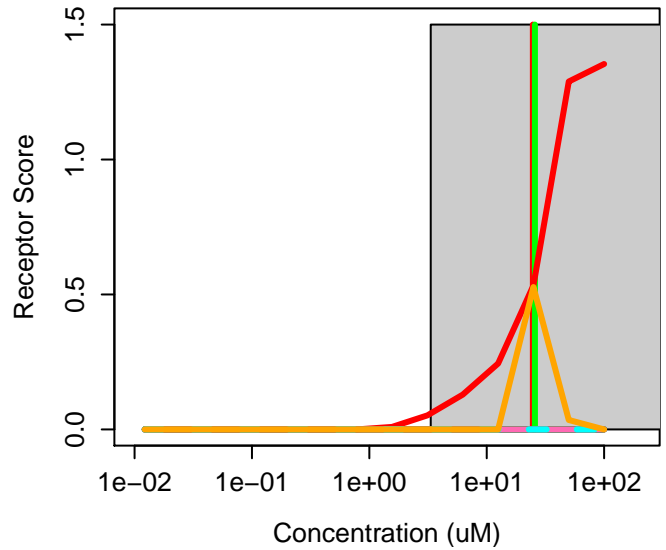

7747-35-5 : 5-Ethyl-1-aza-3,7-dioxabicyclo[3.3.0]octane  
Agonist: 0 Antagonist: 0

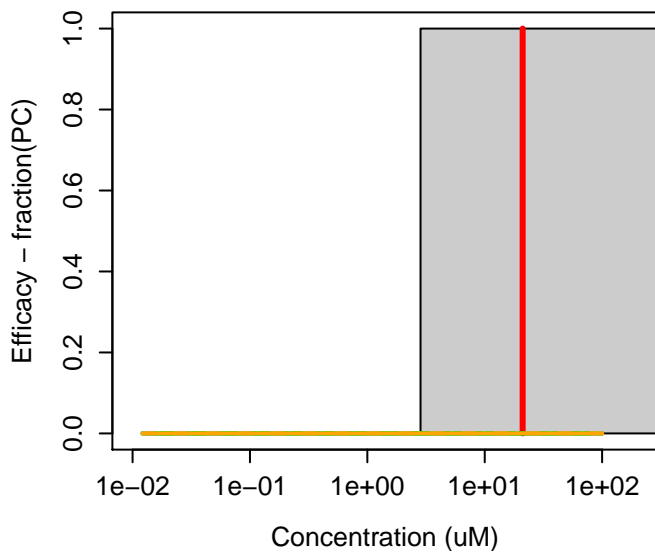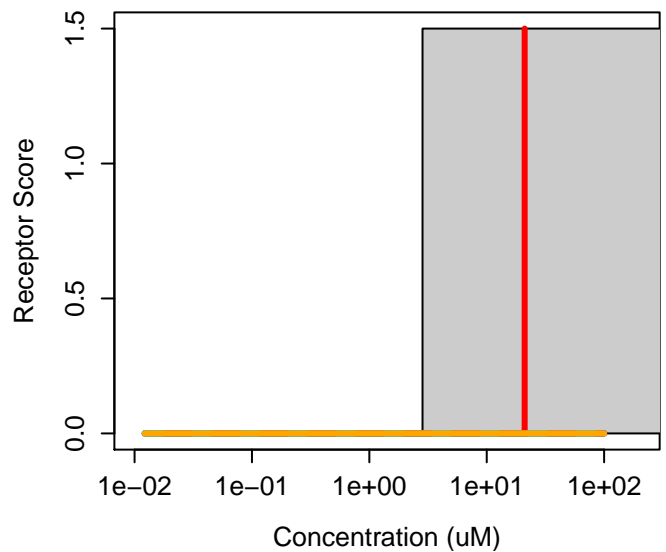

77-47-4 : Hexachlorocyclopentadiene

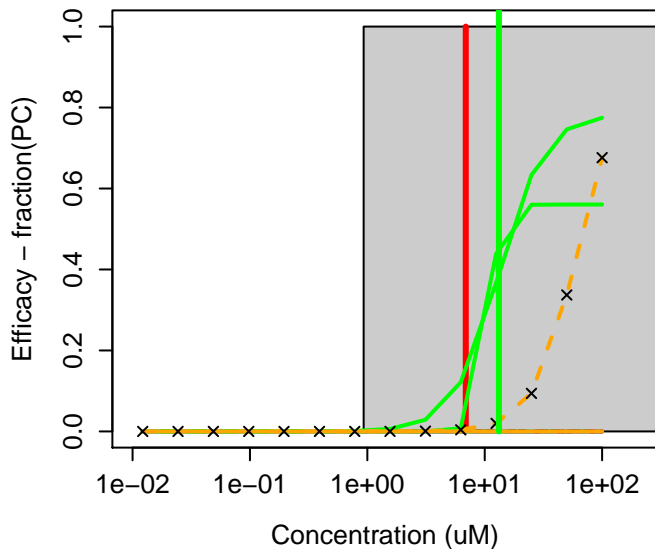

77-47-4 : Hexachlorocyclopentadiene  
Agonist: 0 Antagonist: 0.067

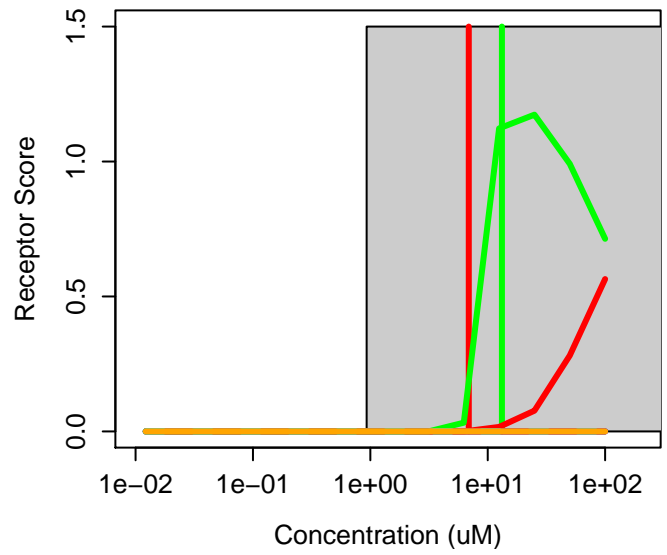

77-48-5 : 1,3-Dibromo-5,5-dimethylhydantoin



77-48-5 : 1,3-Dibromo-5,5-dimethylhydantoin  
Agonist: 0 Antagonist: 0



77501-63-4 : Lactofen

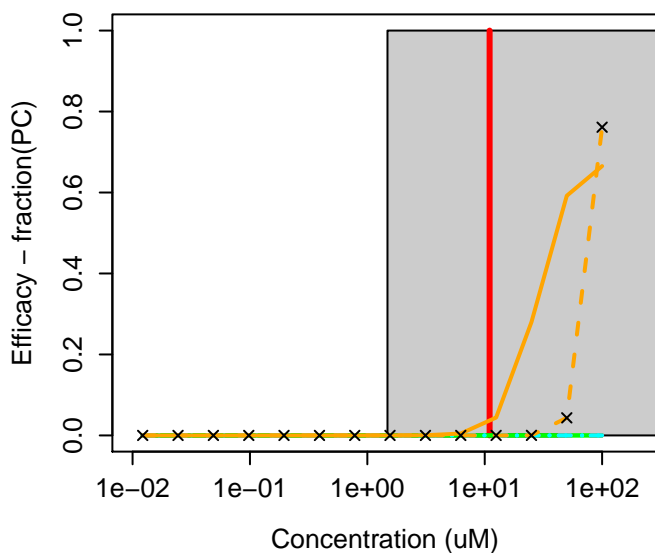

77501-63-4 : Lactofen  
Agonist: 0 Antagonist: 0

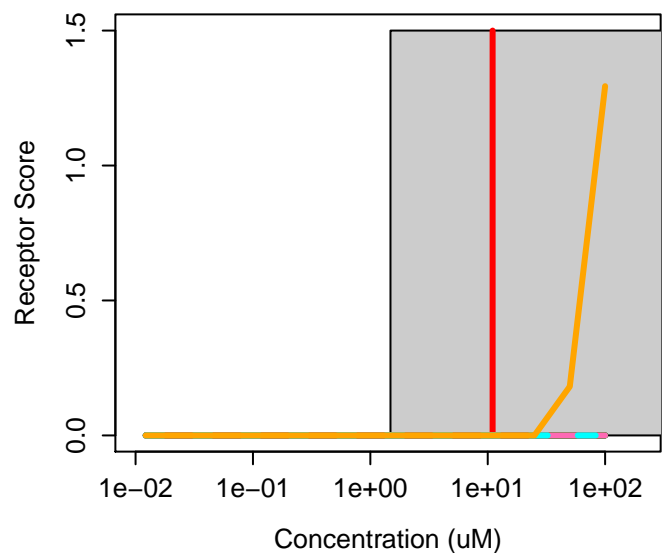

7757-79-1 : Potassium nitrate

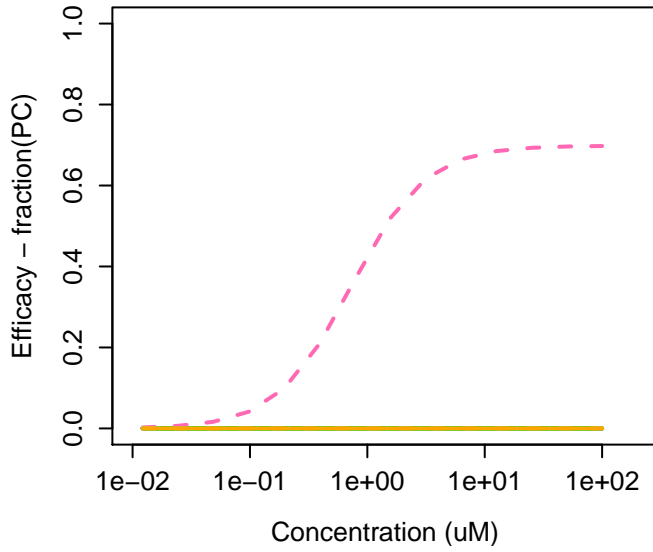

7757-79-1 : Potassium nitrate  
Agonist: 0 Antagonist: 0

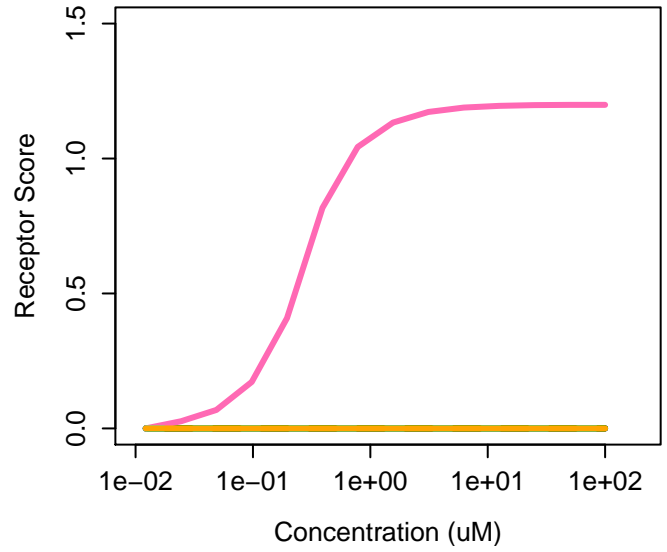

7758-19-2 : Sodium chlorite

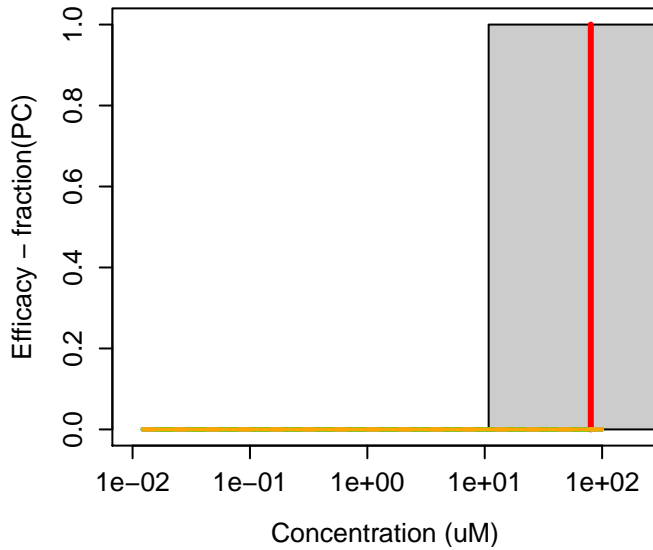

7758-19-2 : Sodium chlorite  
Agonist: 0 Antagonist: 0

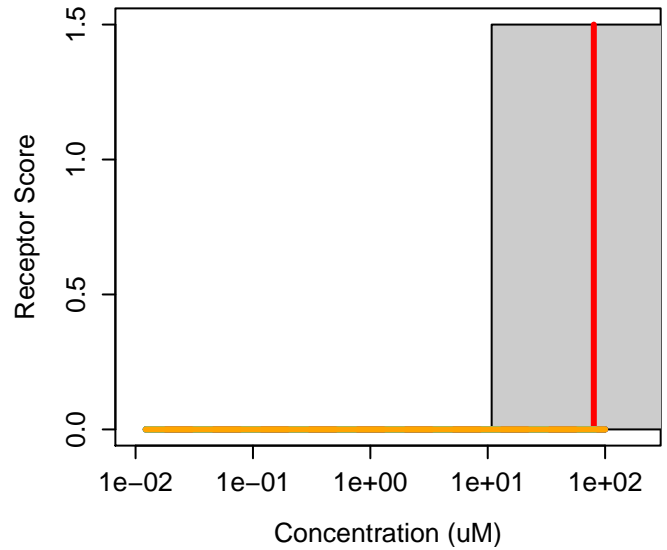

77-71-4 : 5,5-Dimethylhydantoin



77-71-4 : 5,5-Dimethylhydantoin  
Agonist: 0 Antagonist: 0



**7773-06-0 : Ammonium sulfamate**



**7773-06-0 : Ammonium sulfamate  
Agonist: 0 Antagonist: 0**



**77-73-6 : Dicyclopentadiene**



**77-73-6 : Dicyclopentadiene  
Agonist: 0 Antagonist: 0**



**7775-27-1 : Sodium persulfate**



**7775-27-1 : Sodium persulfate  
Agonist: 0 Antagonist: 0**



77-78-1 : Dimethyl sulfate

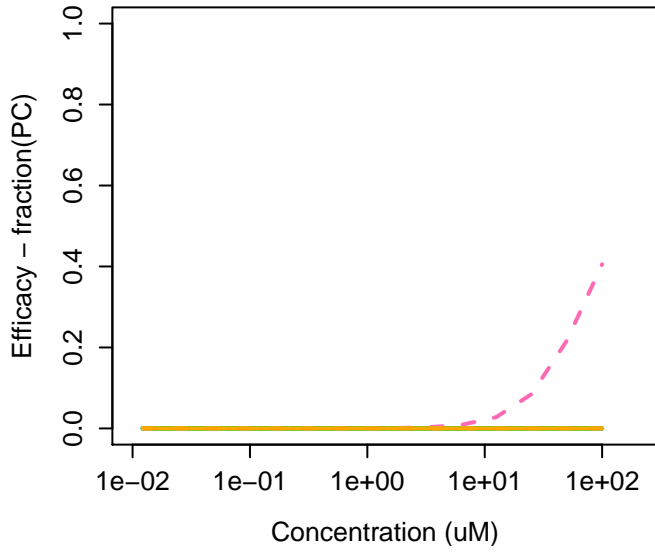

77-78-1 : Dimethyl sulfate  
Agonist: 0 Antagonist: 0

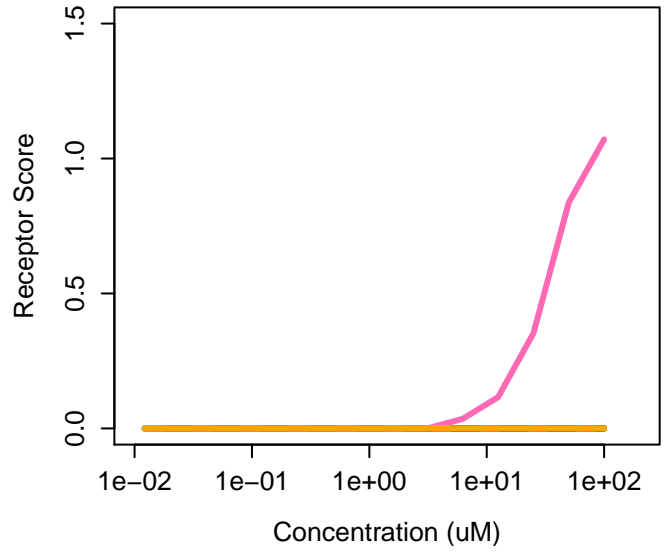

7779-27-3 : 1,3,5-Triethylhexahydro-s-triazine

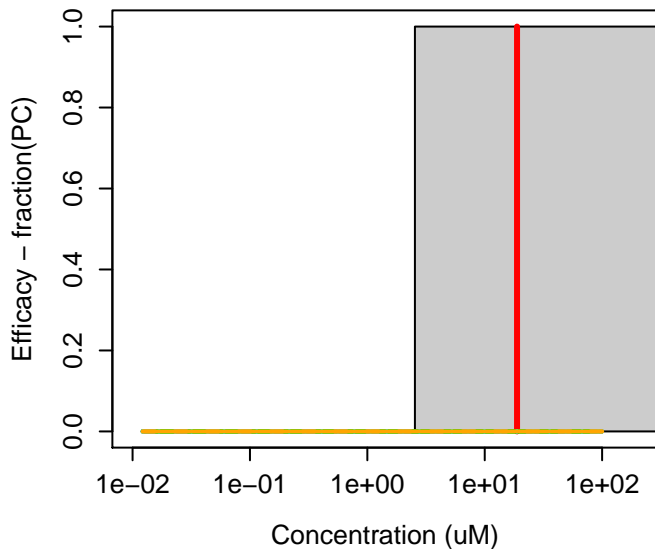

7779-27-3 : 1,3,5-Triethylhexahydro-s-triazine  
Agonist: 0 Antagonist: 0

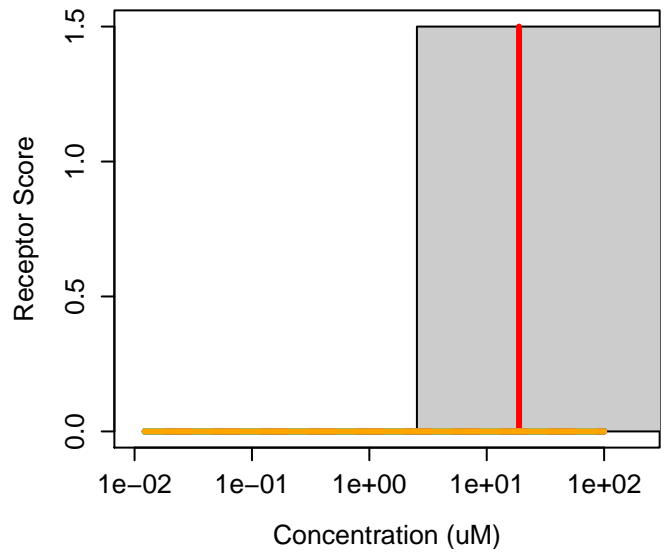

77-83-8 : Ethyl methylphenylglycidate



77-83-8 : Ethyl methylphenylglycidate  
Agonist: 0 Antagonist: 0





7785-26-4 : (-)-alpha-Pinene

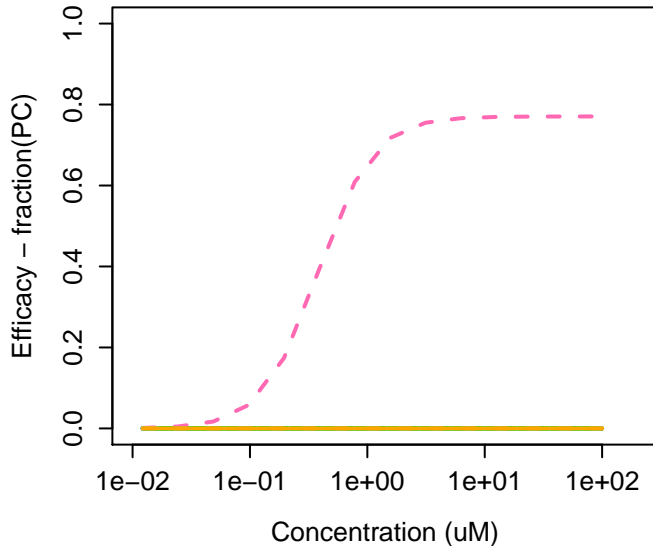

7785-26-4 : (-)-alpha-Pinene  
Agonist: 7.4e-05 Antagonist: 0

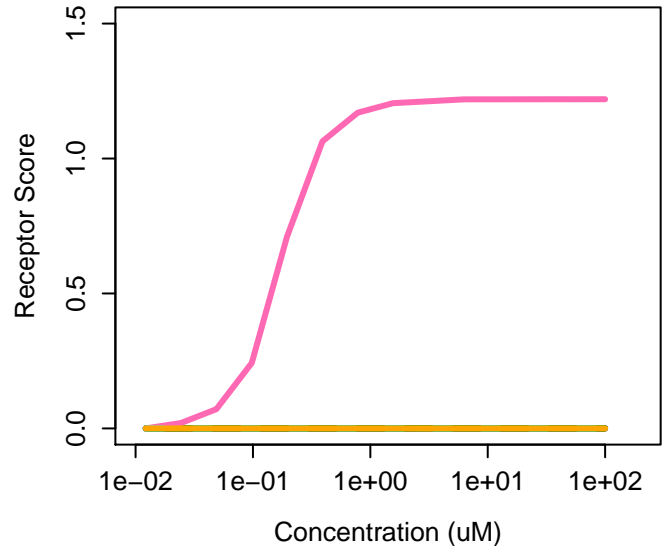

77-86-1 : Tromethamine

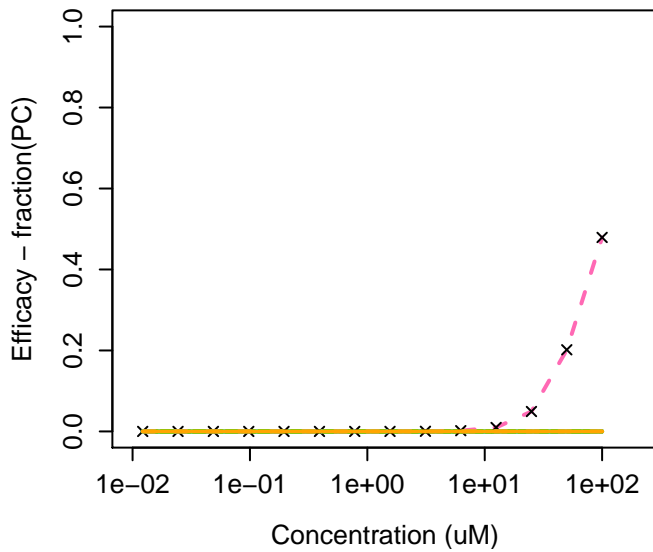

77-86-1 : Tromethamine  
Agonist: 0 Antagonist: 0

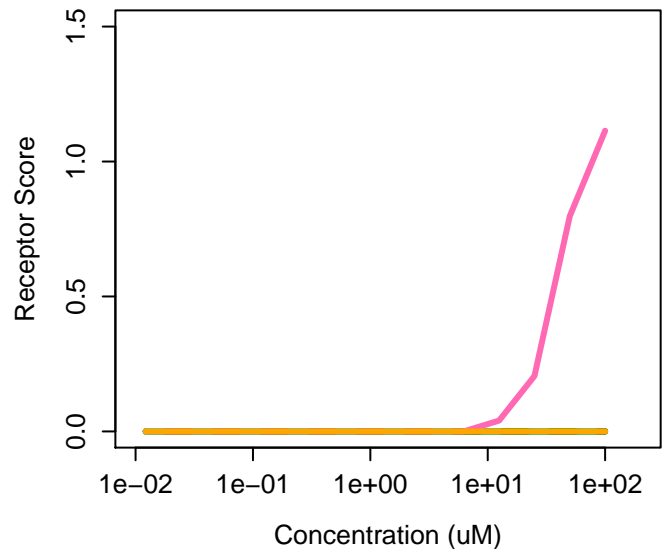

7786-34-7 : Mevinphos

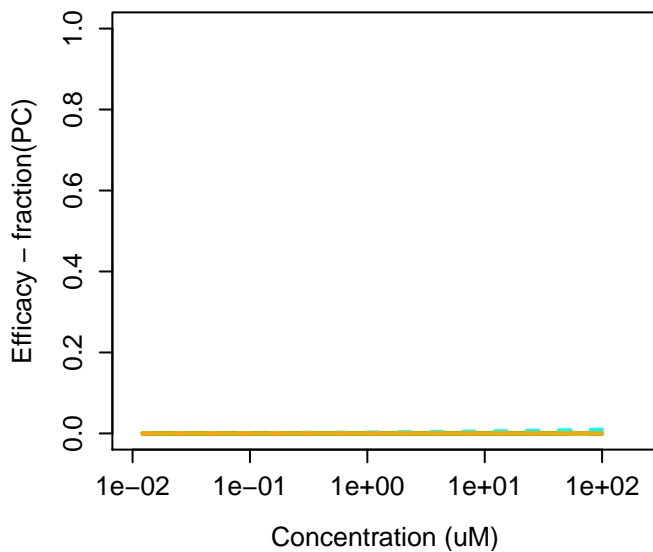

7786-34-7 : Mevinphos  
Agonist: 0 Antagonist: 0

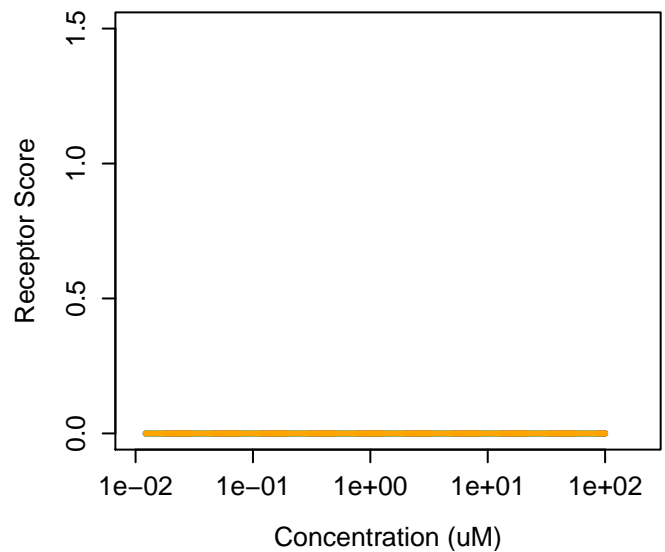

**77-89-4 : Acetyltriethyl citrate**

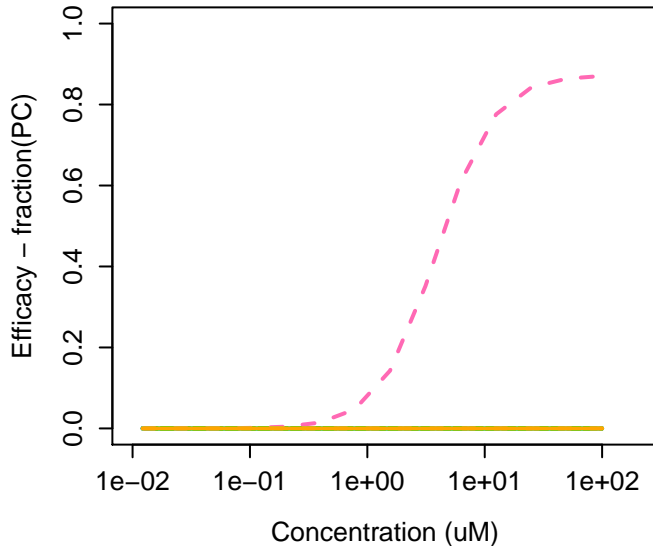

**77-89-4 : Acetyltriethyl citrate  
Agonist: 0 Antagonist: 0**

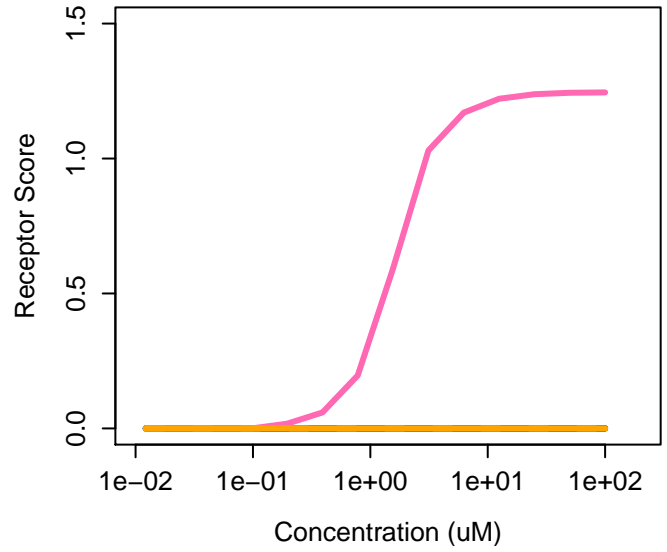

**77-90-7 : Acetyl tributyl citrate**

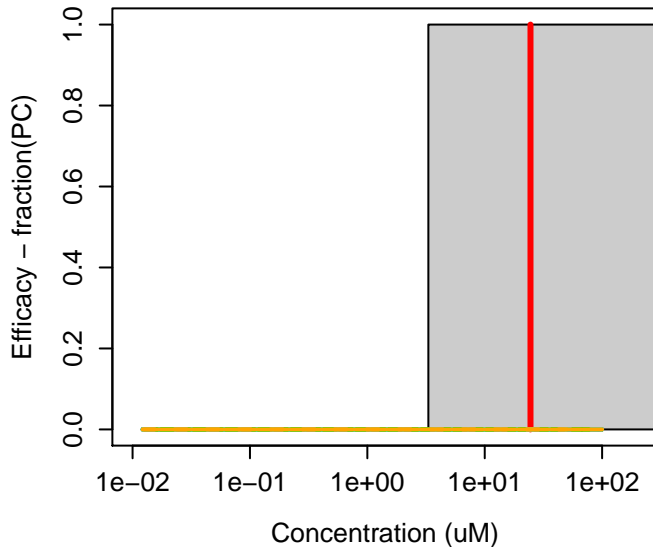

**77-90-7 : Acetyl tributyl citrate  
Agonist: 0 Antagonist: 0**

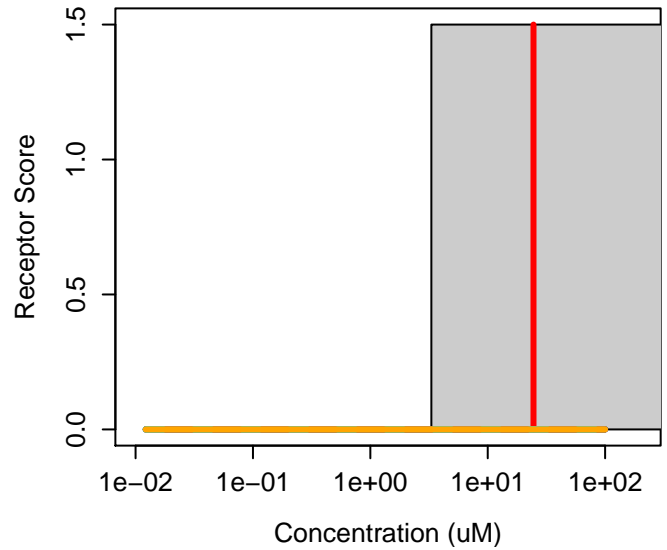

**77-92-9 : Citric acid**



**77-92-9 : Citric acid  
Agonist: 0 Antagonist: 0**



**77-93-0 : Triethyl citrate**

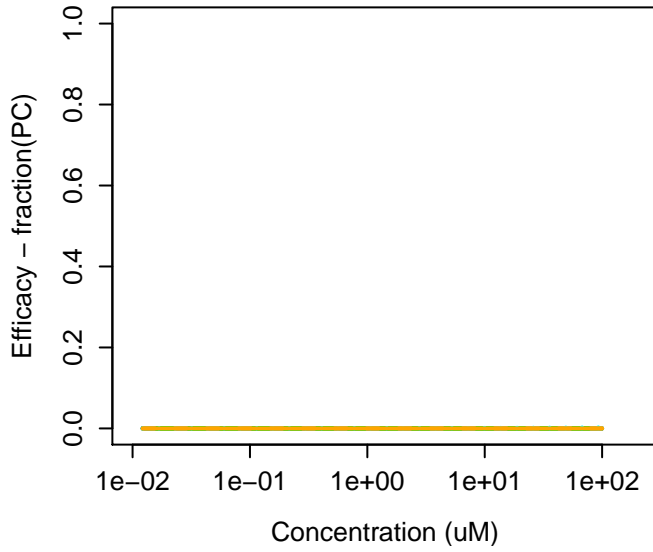

**77-93-0 : Triethyl citrate  
Agonist: 0 Antagonist: 0**



**78-07-9 : Ethyltriethoxysilane**



**78-07-9 : Ethyltriethoxysilane  
Agonist: 0 Antagonist: 0**



**78-11-5 : Pentaerythritol tetranitrate**

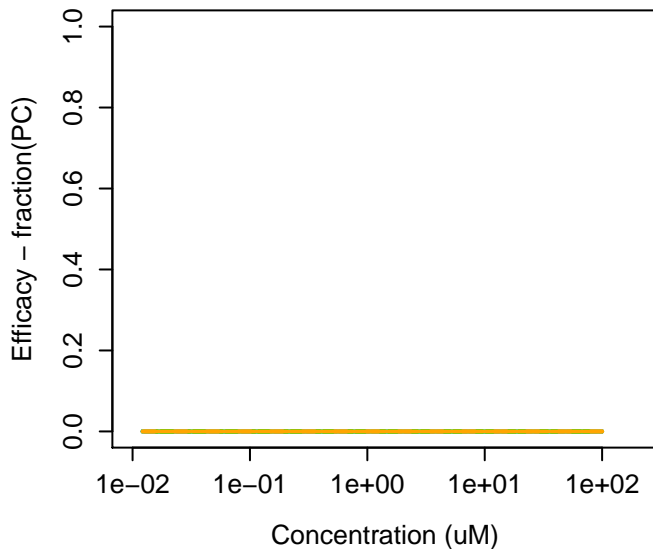

**78-11-5 : Pentaerythritol tetranitrate  
Agonist: 0 Antagonist: 0**



**78-40-0 : Triethyl phosphate**



**78-40-0 : Triethyl phosphate  
Agonist: 0 Antagonist: 0**



**78-42-2 : Tris(2-ethylhexyl) phosphate**

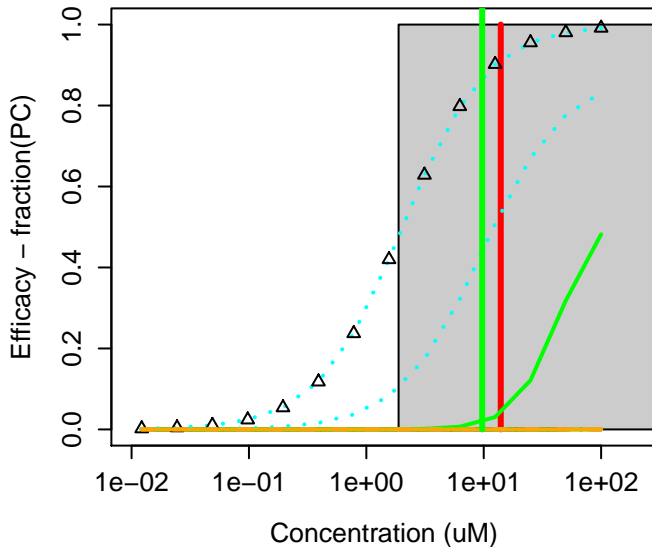

**78-42-2 : Tris(2-ethylhexyl) phosphate  
Agonist: 0.048 Antagonist: 0**

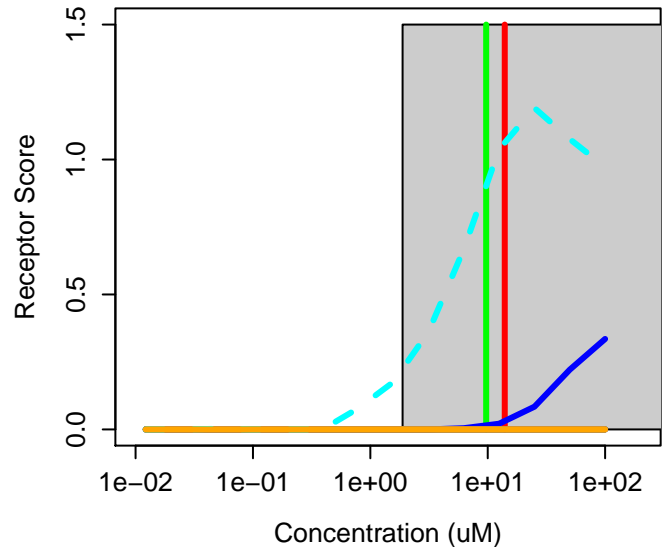

**78473-71-9 : Enterolactone**

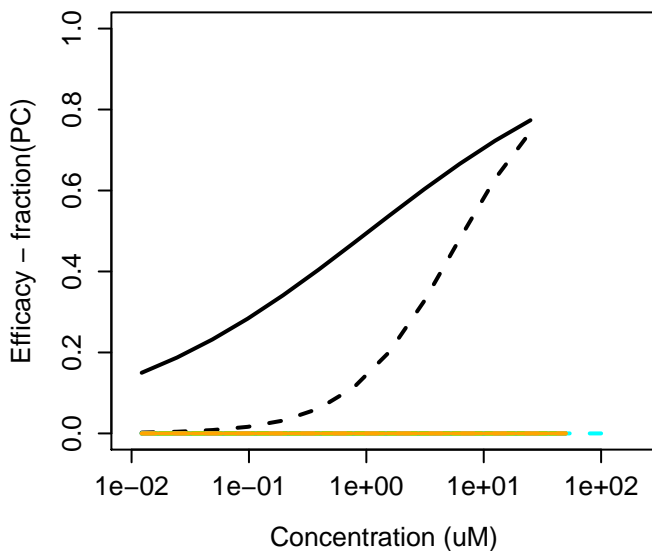

**78473-71-9 : Enterolactone  
Agonist: 0 Antagonist: 0.00036**

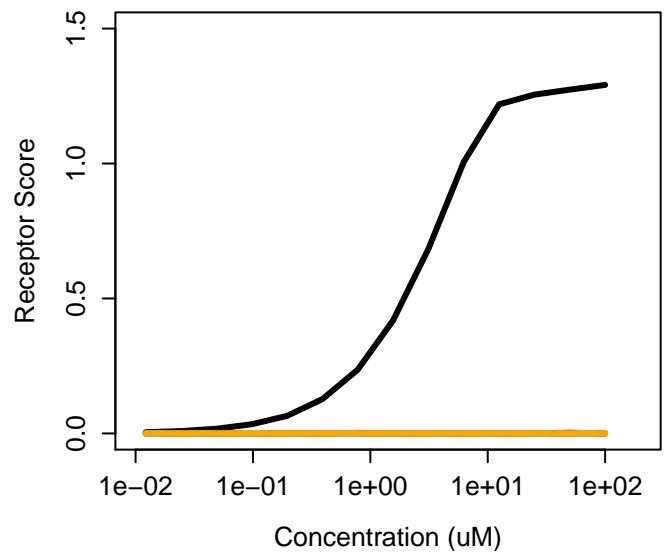

**78-48-8 : Tribufos**

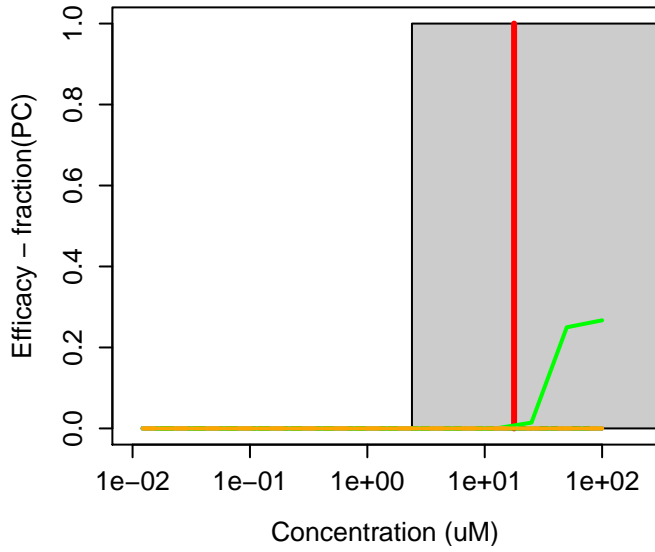

**78-48-8 : Tribufos  
Agonist: 0 Antagonist: 0**

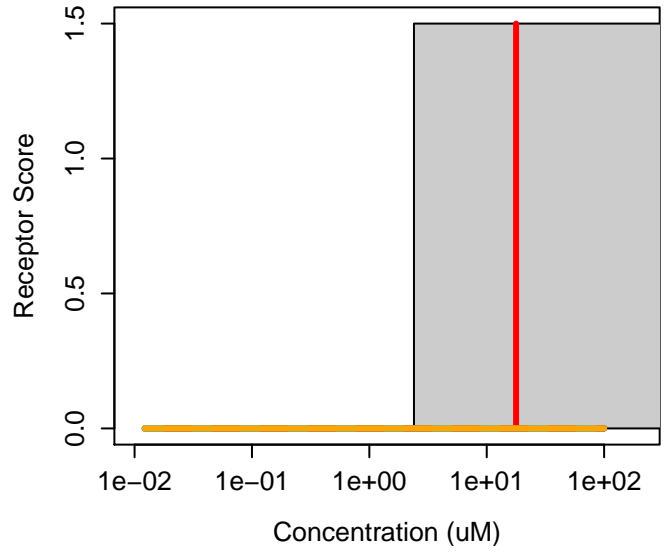

**78491-02-8 : Diazolidinyl urea**

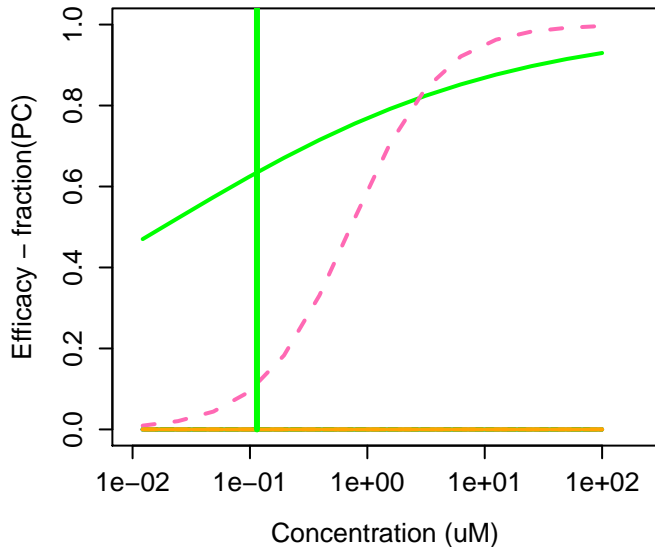

**78491-02-8 : Diazolidinyl urea  
Agonist: 0.25 Antagonist: 0**

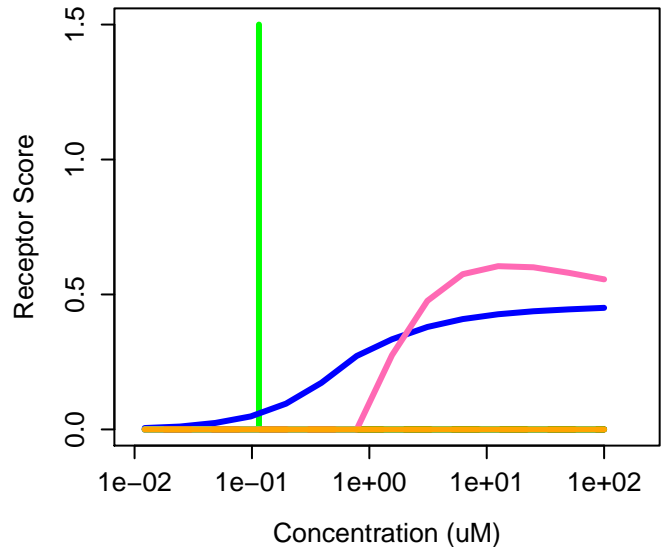

**78-51-3 : Tris(2-butoxyethyl) phosphate**



**78-51-3 : Tris(2-butoxyethyl) phosphate  
Agonist: 0 Antagonist: 0**



78587-05-0 : Hexythiazox

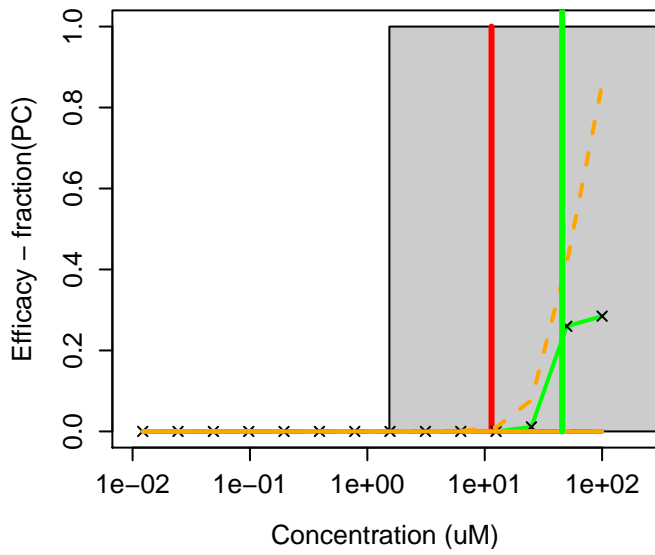

78587-05-0 : Hexythiazox  
Agonist: 0 Antagonist: 0.025

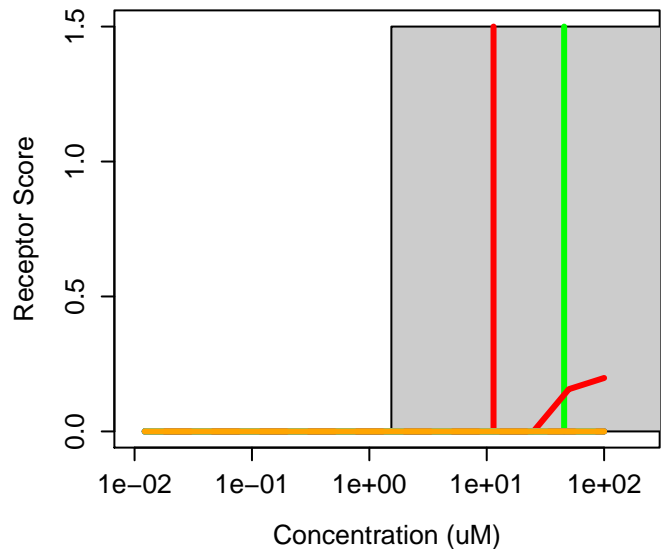

78-59-1 : Isophorone



78-59-1 : Isophorone  
Agonist: 0 Antagonist: 0



78-63-7 : 2,5-Dimethyl-2,5-di-(tert-butylperoxy)he: 78-63-7 : 2,5-Dimethyl-2,5-di-(tert-butylperoxy)he:  
Agonist: 0 Antagonist: 0

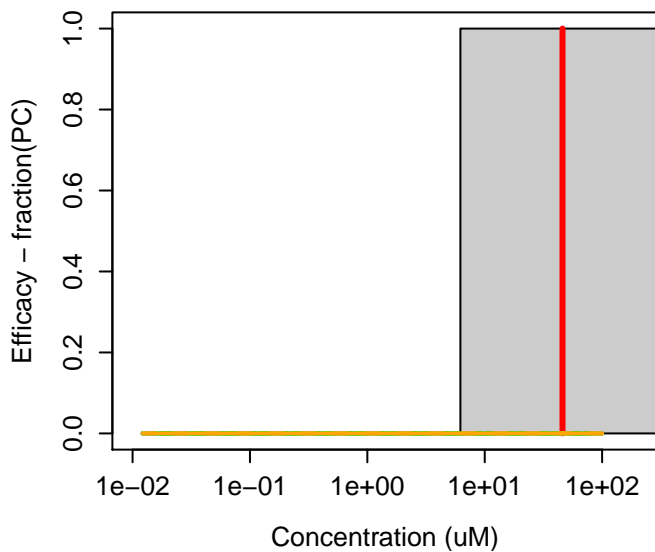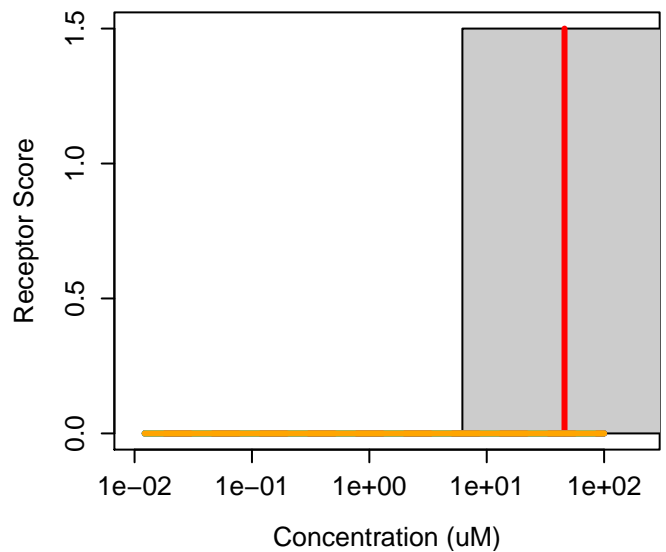

**78-69-3 : 3,7-Dimethyl-3-octanol**

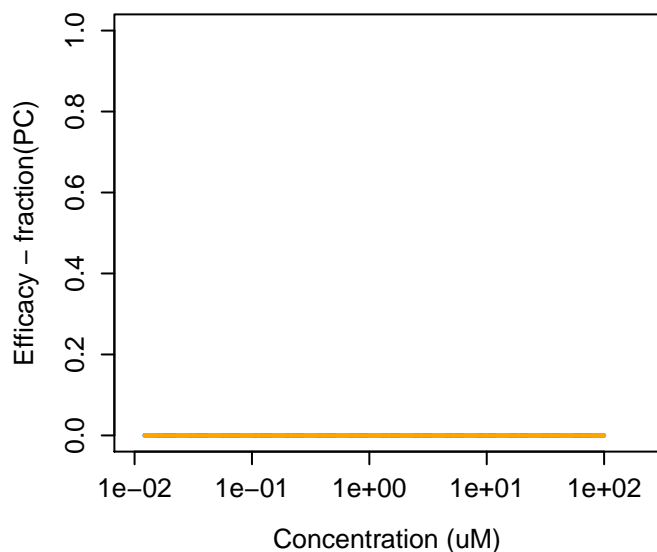

**78-69-3 : 3,7-Dimethyl-3-octanol**  
**Agonist: 0 Antagonist: 0**



**78-70-6 : Linalool**

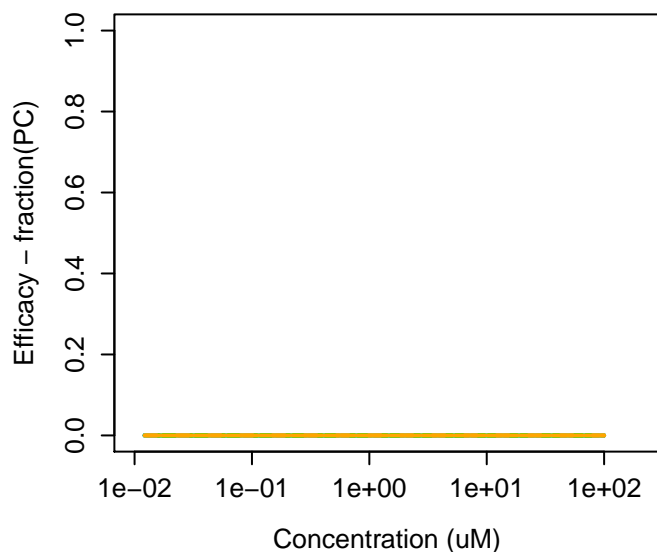

**78-70-6 : Linalool**  
**Agonist: 0 Antagonist: 0**



**78-82-0 : 2-Methylpropanenitrile**

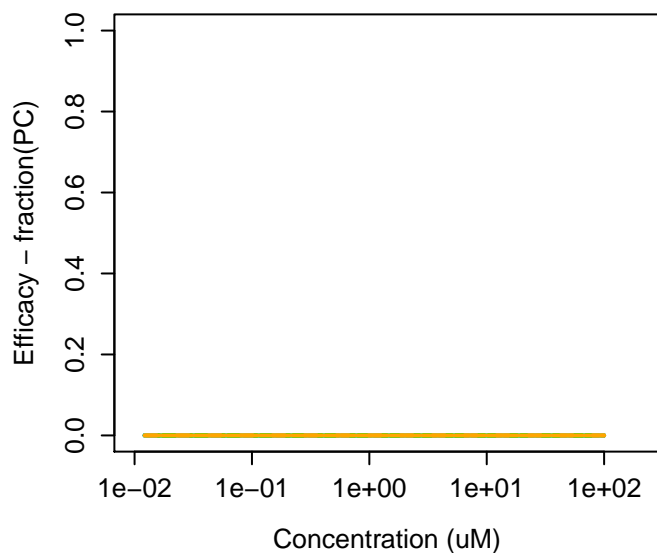

**78-82-0 : 2-Methylpropanenitrile**  
**Agonist: 0 Antagonist: 0**

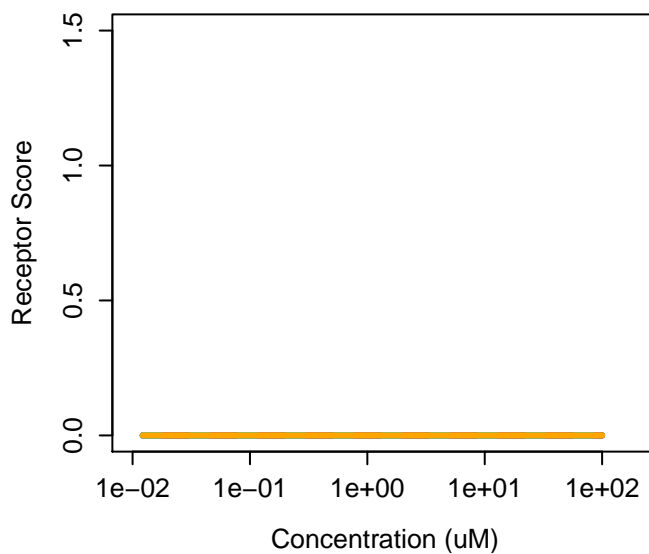

789-02-6 : o,p'-DDT

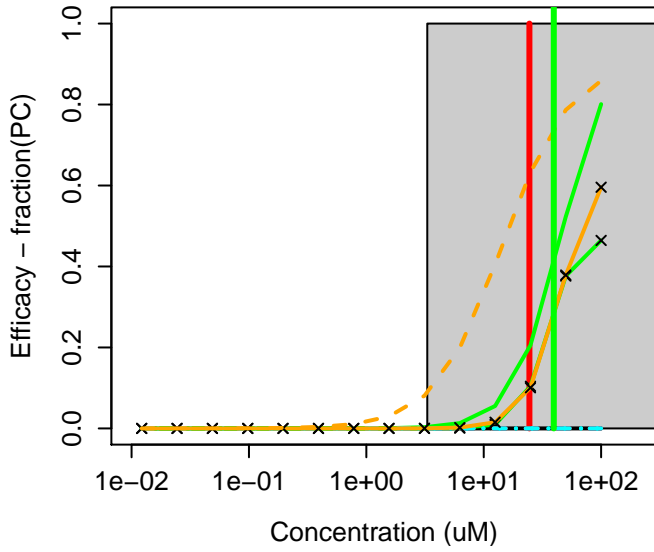

789-02-6 : o,p'-DDT  
Agonist: 0 Antagonist: 0.15

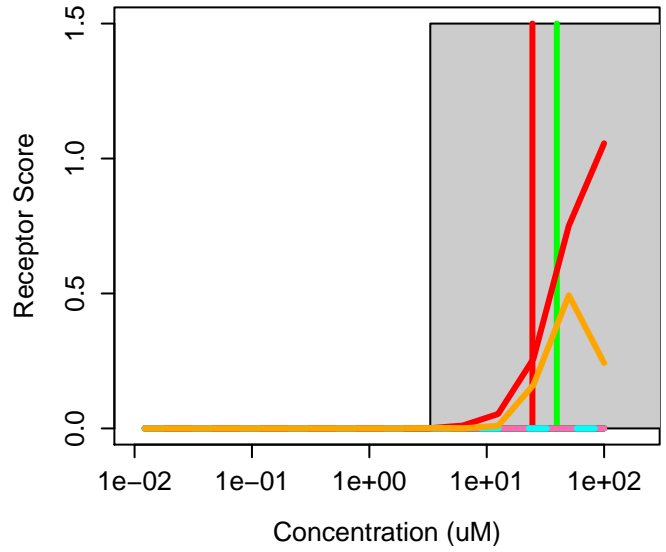

78-96-6 : 1-Amino-2-propanol



78-96-6 : 1-Amino-2-propanol  
Agonist: 0 Antagonist: 0



79-06-1 : Acrylamide

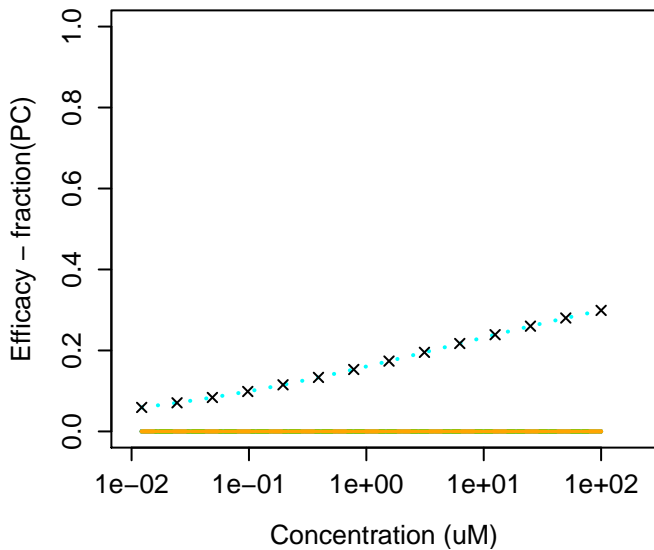

79-06-1 : Acrylamide  
Agonist: 0 Antagonist: 0





**79098-20-7 : 4-Chloropentylbenzene**



**79098-20-7 : 4-Chloropentylbenzene**  
**Agonist: 0 Antagonist: 0**



**79-14-1 : Glycolic acid**



**79-14-1 : Glycolic acid**  
**Agonist: 0 Antagonist: 0**



**79-16-3 : N-Methylacetamide**

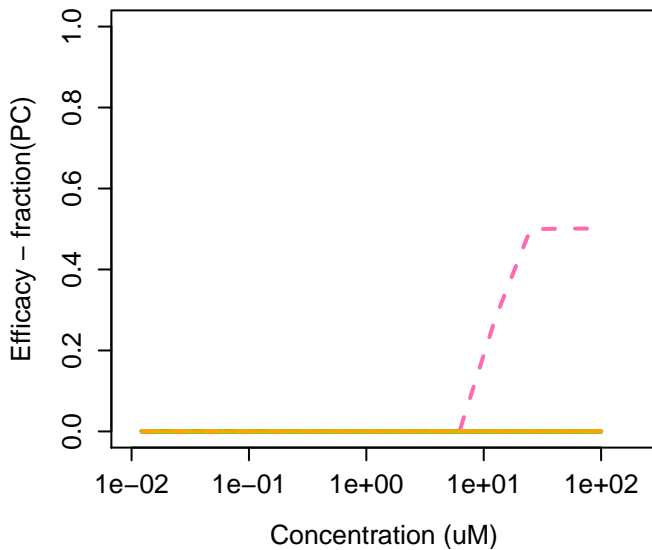

**79-16-3 : N-Methylacetamide**  
**Agonist: 0 Antagonist: 0**

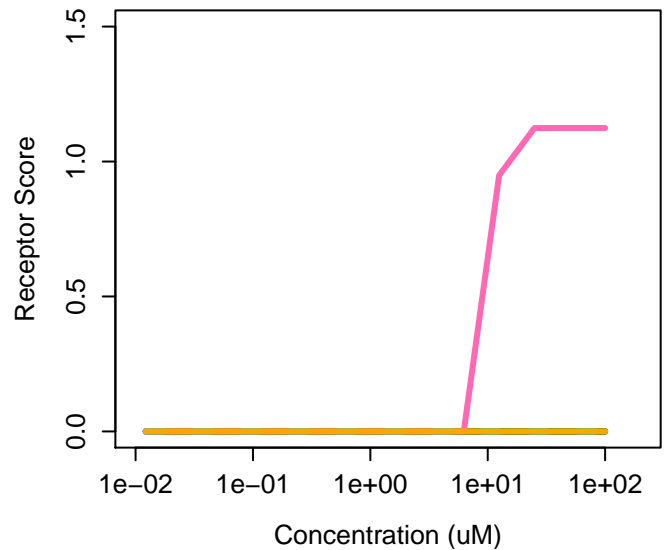

**79241-46-6 : Fluazifop-P-butyl**

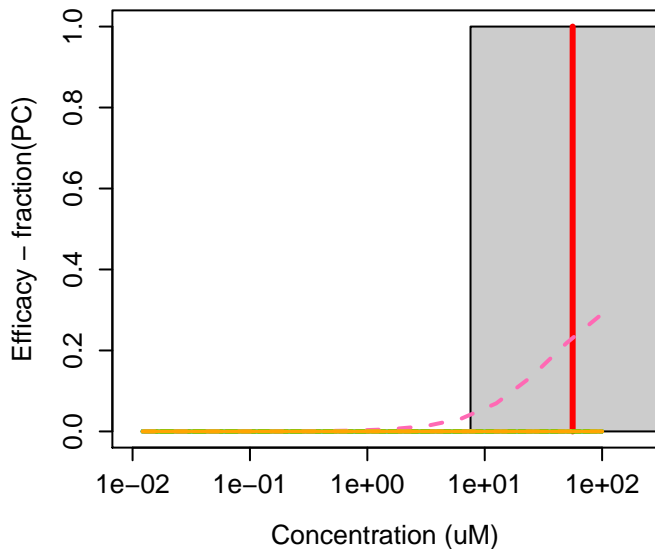

**79241-46-6 : Fluazifop-P-butyl  
Agonist: 0 Antagonist: 0**

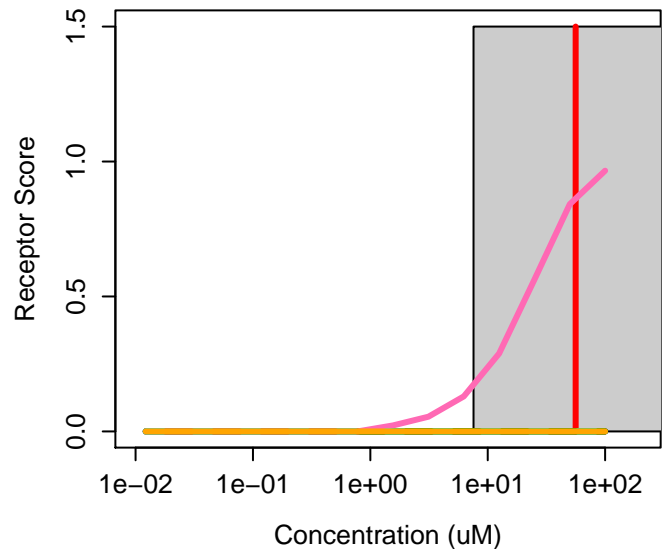

**79-24-3 : Nitroethane**

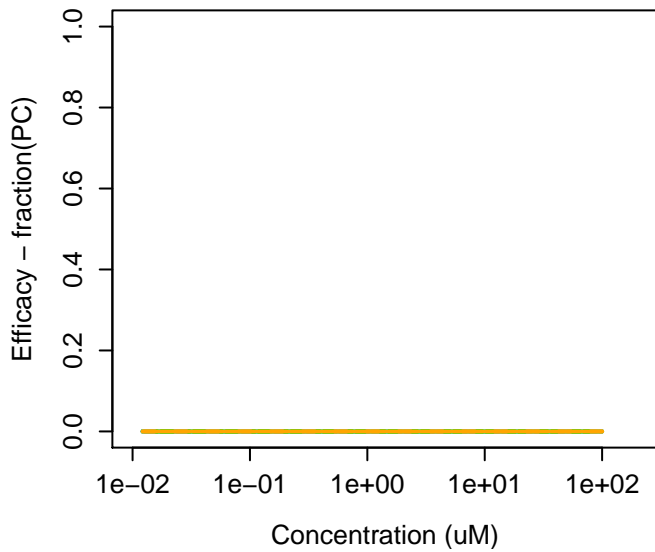

**79-24-3 : Nitroethane  
Agonist: 0 Antagonist: 0**



**79277-27-3 : Thifensulfuron-methyl**



**79277-27-3 : Thifensulfuron-methyl  
Agonist: 0 Antagonist: 0**



**79-39-0 : Methacrylamide**



**79-39-0 : Methacrylamide  
Agonist: 0 Antagonist: 0**



**79-43-6 : Dichloroacetic acid**



**79-43-6 : Dichloroacetic acid  
Agonist: 0 Antagonist: 0**



**79-44-7 : Dimethylcarbamoyl chloride**



**79-44-7 : Dimethylcarbamoyl chloride  
Agonist: 0 Antagonist: 0**



79538-32-2 : Tefluthrin

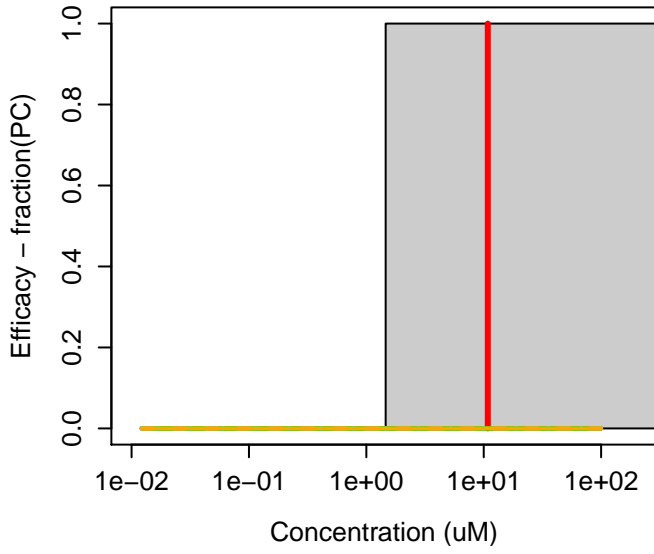

79538-32-2 : Tefluthrin  
Agonist: 0 Antagonist: 0

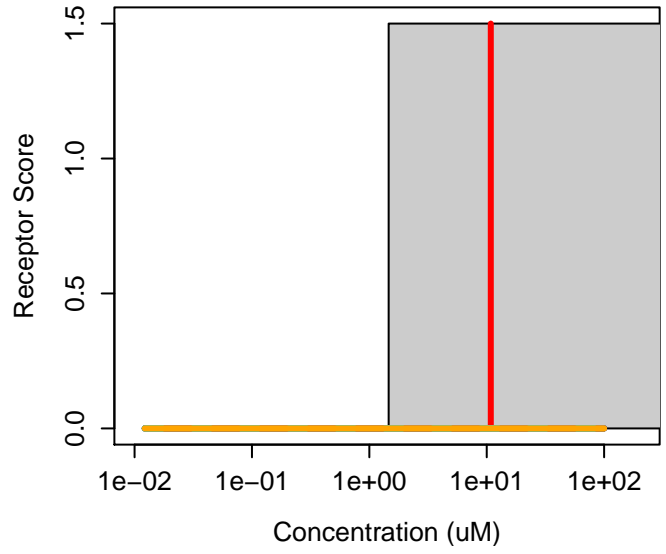

79-57-2 : Oxytetracycline

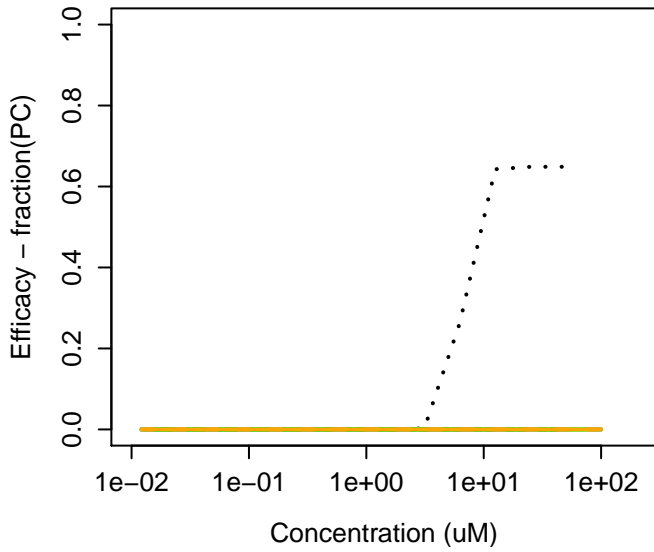

79-57-2 : Oxytetracycline  
Agonist: 0 Antagonist: 0



79622-59-6 : Fluazinam

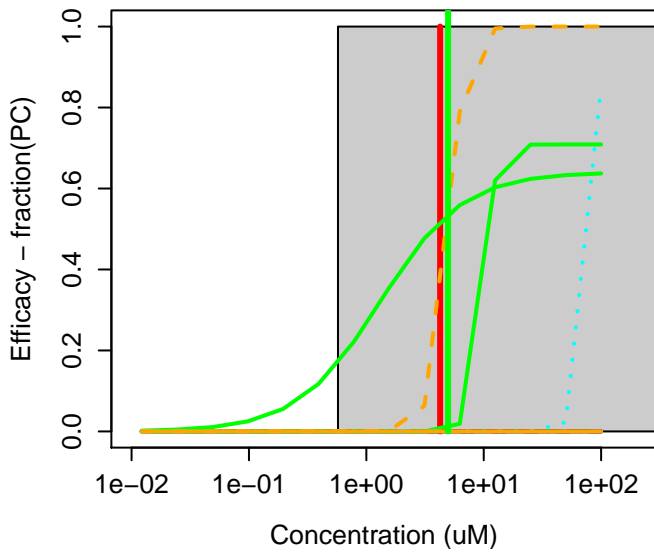

79622-59-6 : Fluazinam  
Agonist: 0.016 Antagonist: 0.16

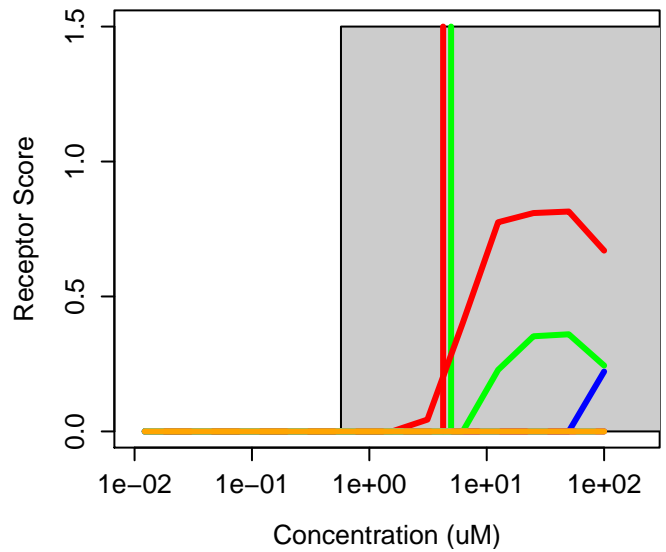

**797-63-7 : Norgestrel**

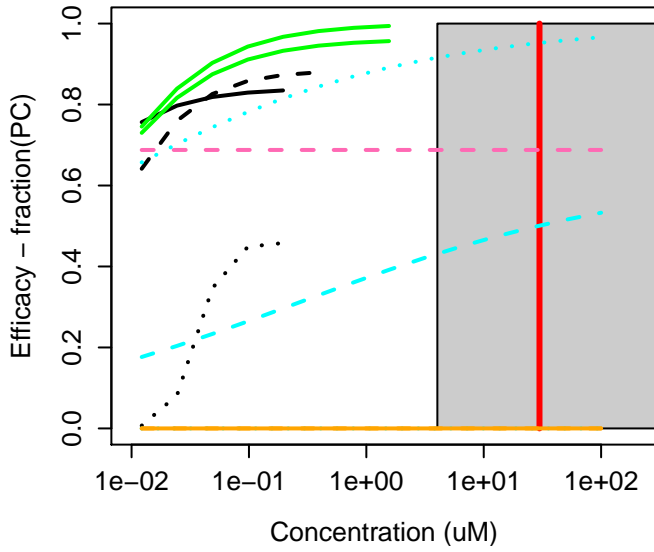

**797-63-7 : Norgestrel  
Agonist: 1.5 Antagonist: 0**

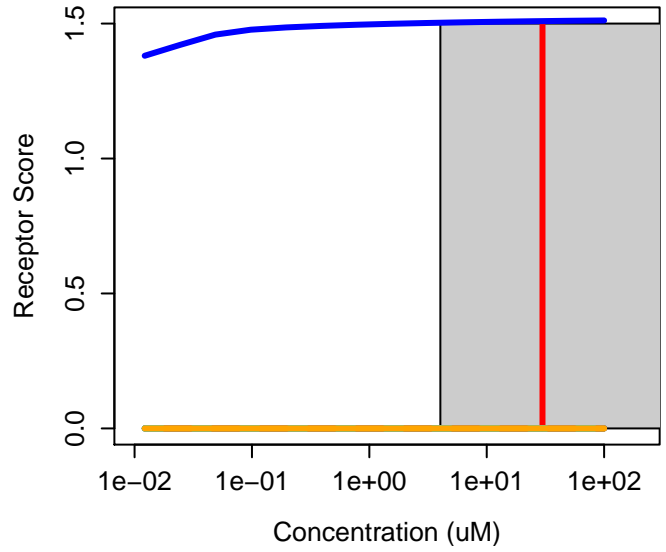

**79902-63-9 : Simvastatin**

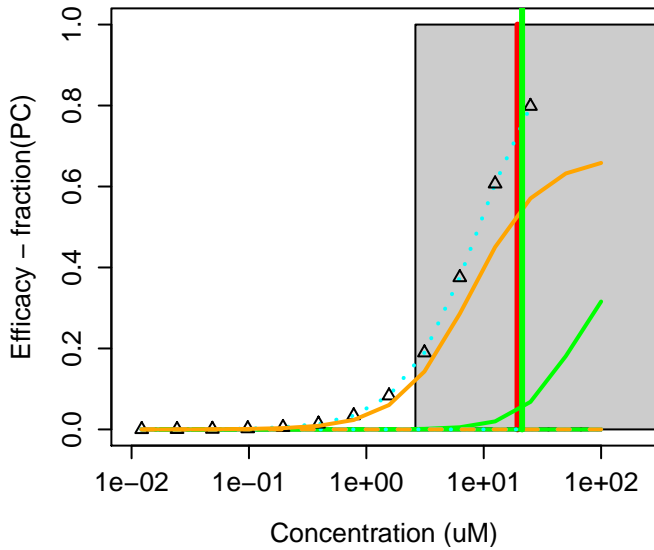

**79902-63-9 : Simvastatin  
Agonist: 0.011 Antagonist: 0.017**

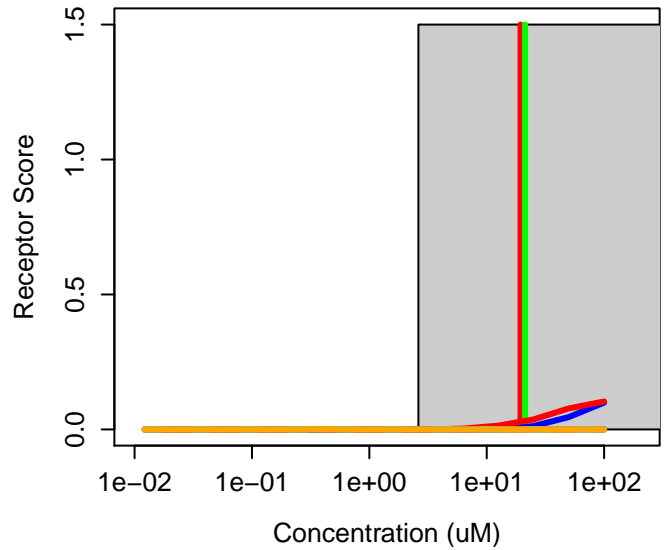

**79-92-5 : Camphene**



**79-92-5 : Camphene  
Agonist: 0 Antagonist: 0**



79-94-7 : 3,3',5,5'-Tetrabromobisphenol A

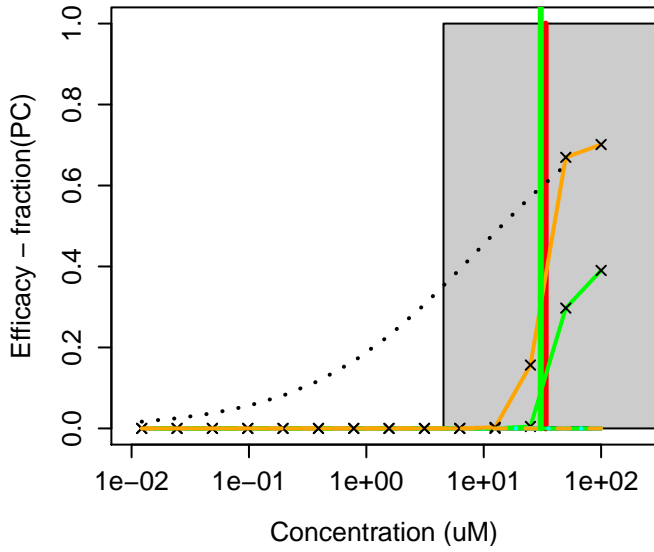

79-94-7 : 3,3',5,5'-Tetrabromobisphenol A  
Agonist: 0 Antagonist: 0.1

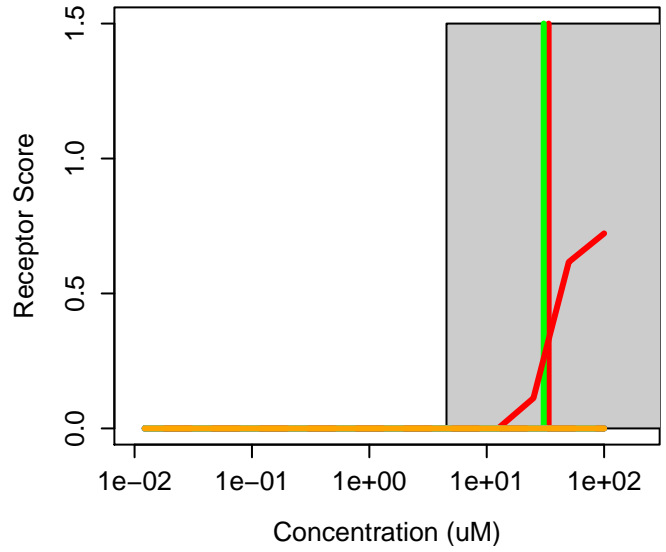

79-95-8 : 2,2',6,6'-Tetrachlorobisphenol A

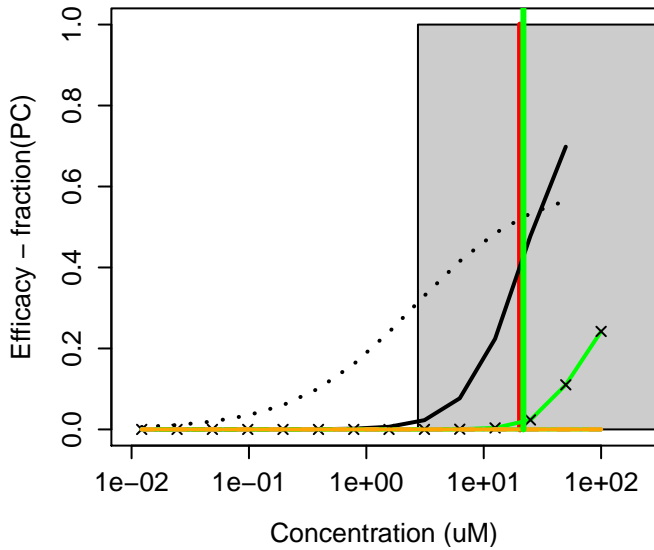

79-95-8 : 2,2',6,6'-Tetrachlorobisphenol A  
Agonist: 0.011 Antagonist: 0.023

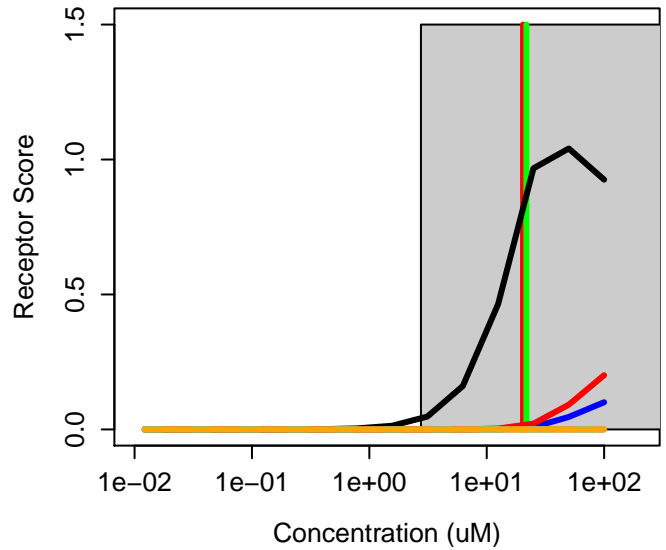

79983-71-4 : Hexaconazole

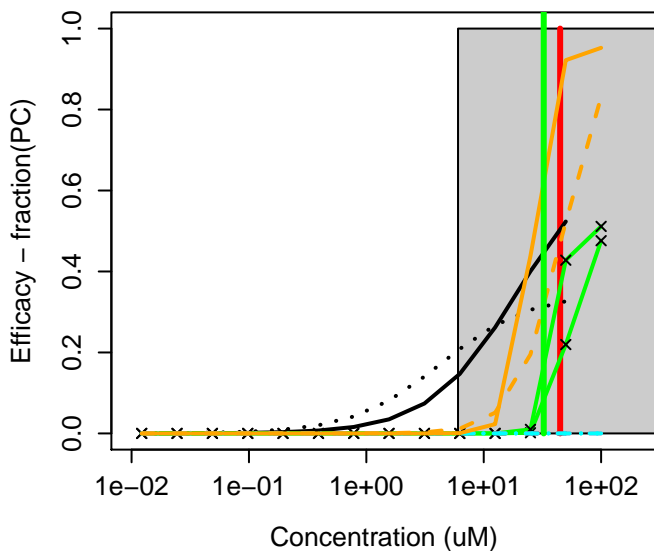

79983-71-4 : Hexaconazole  
Agonist: 0 Antagonist: 0.23

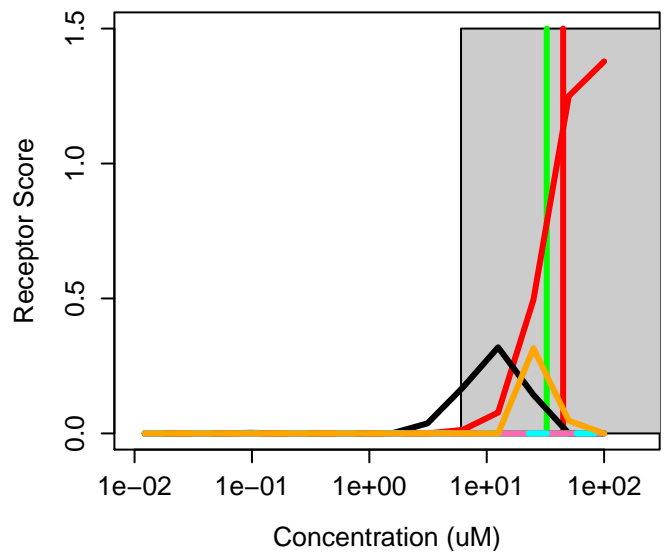

**8000-34-8 : Clove leaf oil**

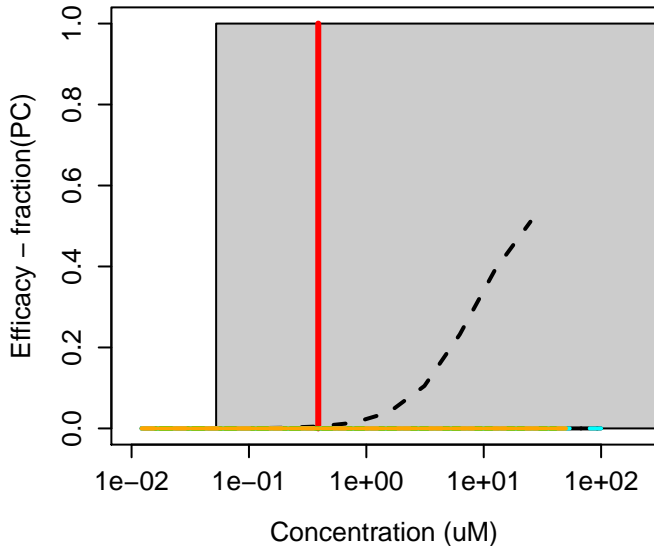

**8000-34-8 : Clove leaf oil**  
**Agonist: 0 Antagonist: 0**

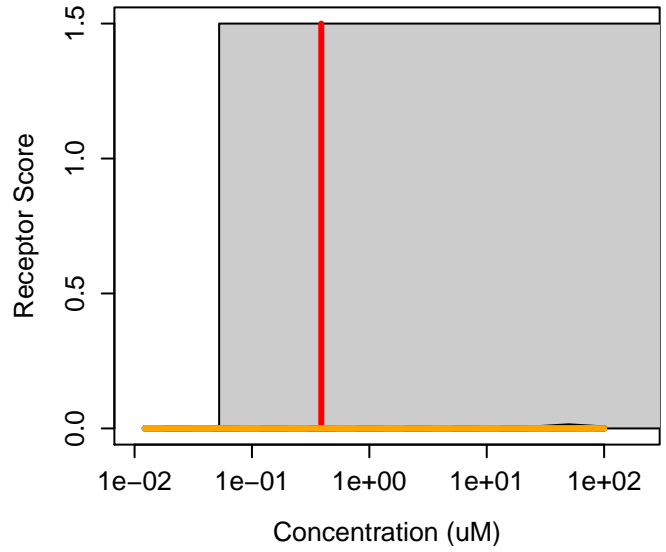

**8000-41-7 : Terpineol**



**8000-41-7 : Terpineol**  
**Agonist: 0 Antagonist: 0**



**8001-54-5 : Benzalkonium chloride**

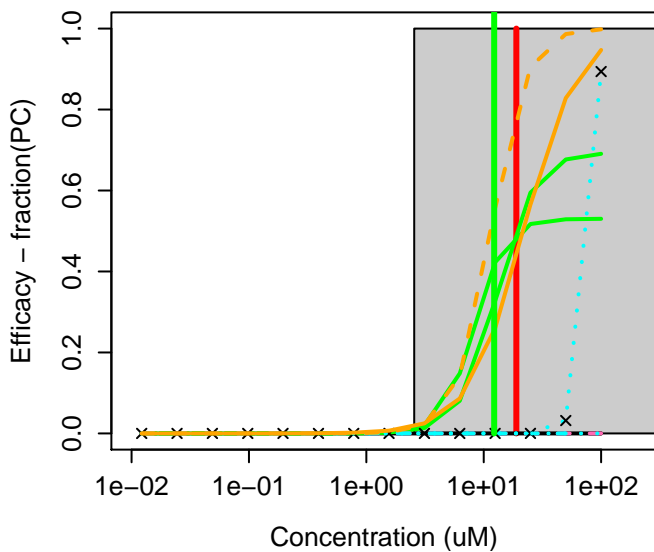

**8001-54-5 : Benzalkonium chloride**  
**Agonist: 0 Antagonist: 0.25**

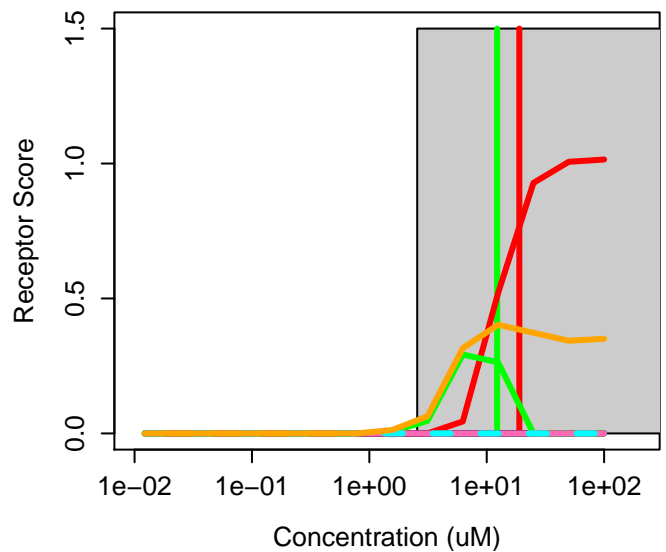

8004-92-0 : C.I. Acid Yellow 3 disodium salt

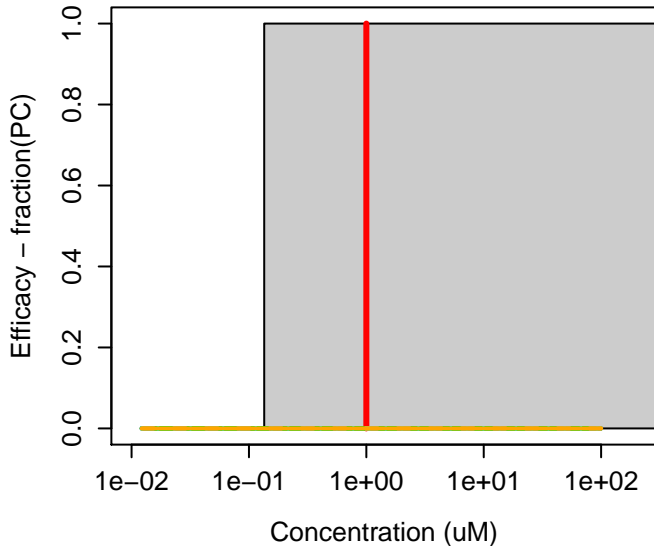

8004-92-0 : C.I. Acid Yellow 3 disodium salt  
Agonist: 0 Antagonist: 0



80-05-7 : Bisphenol A

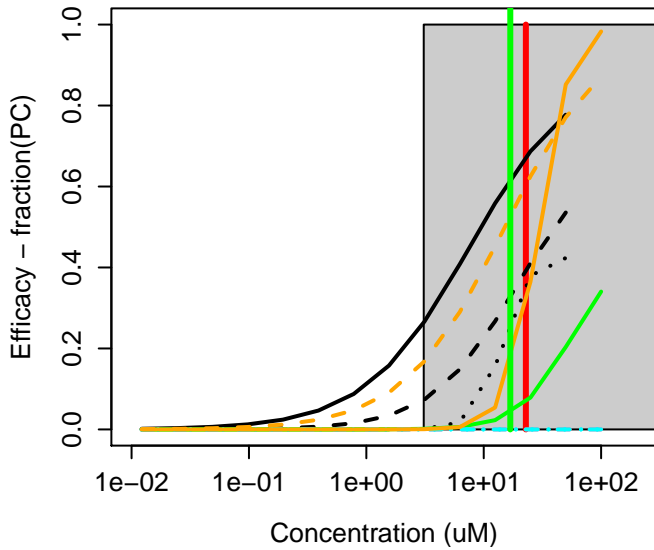

80-05-7 : Bisphenol A  
Agonist: 0 Antagonist: 0.35

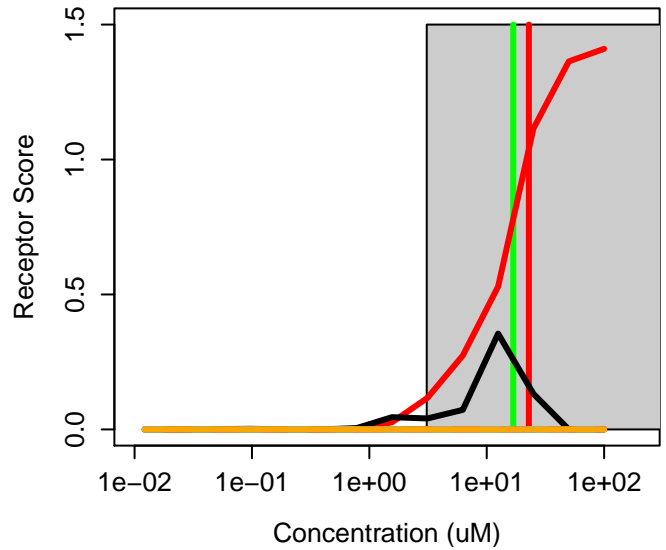

8006-90-4 : Peppermint oil

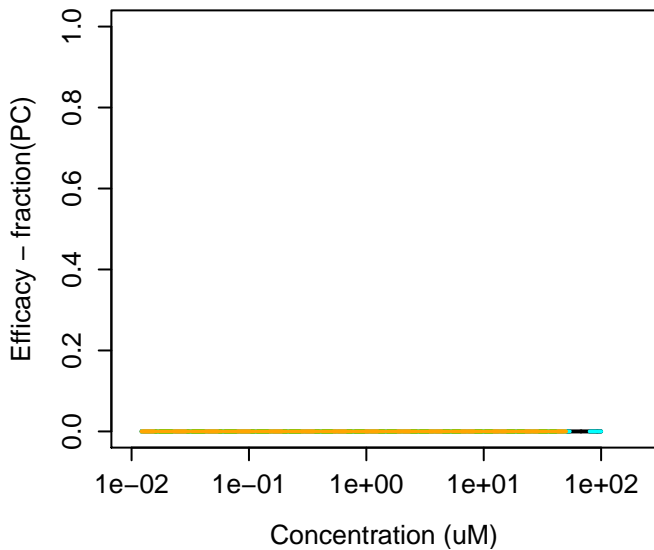

8006-90-4 : Peppermint oil  
Agonist: 0 Antagonist: 0





8007-70-3 : Anise oil

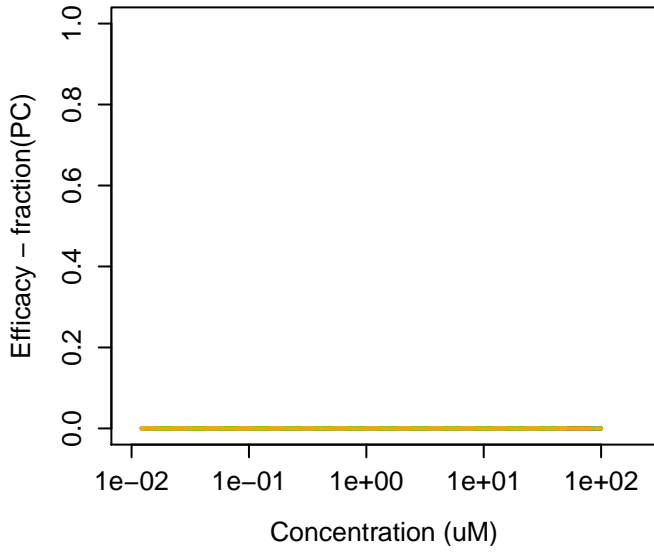

8007-70-3 : Anise oil  
Agonist: 0 Antagonist: 0



80-07-9 : 4,4'-Dichlorodiphenyl sulfone

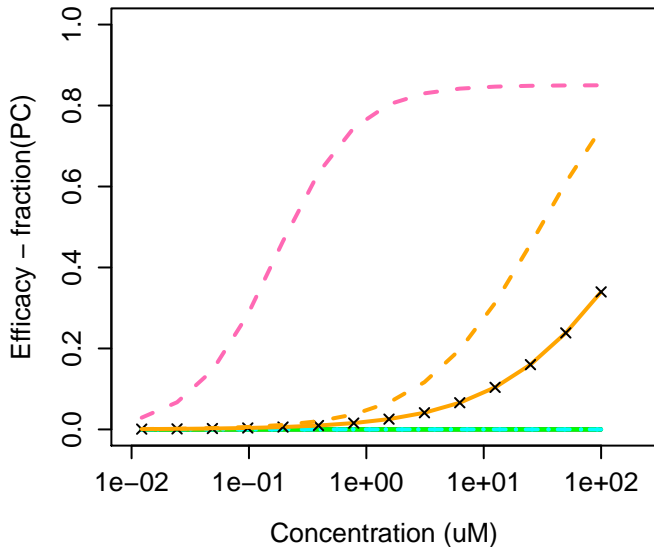

80-07-9 : 4,4'-Dichlorodiphenyl sulfone  
Agonist: 0 Antagonist: 0

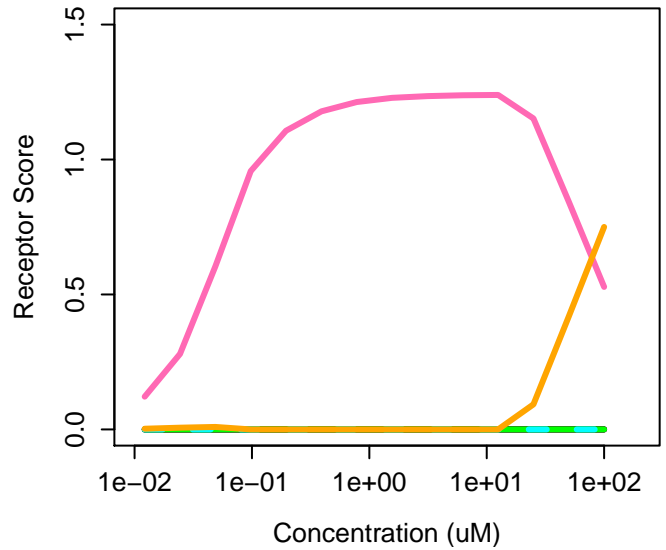

80-08-0 : Dapsone



80-08-0 : Dapsone  
Agonist: 0 Antagonist: 0



**80-09-1 : 4,4'-Sulfonyldiphenol**

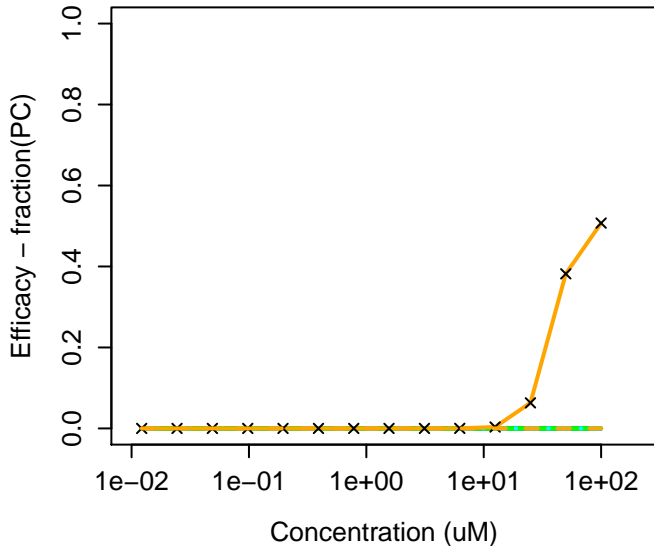

**80-09-1 : 4,4'-Sulfonyldiphenol  
Agonist: 0 Antagonist: 0**



**80-15-9 : Cumene hydroperoxide**

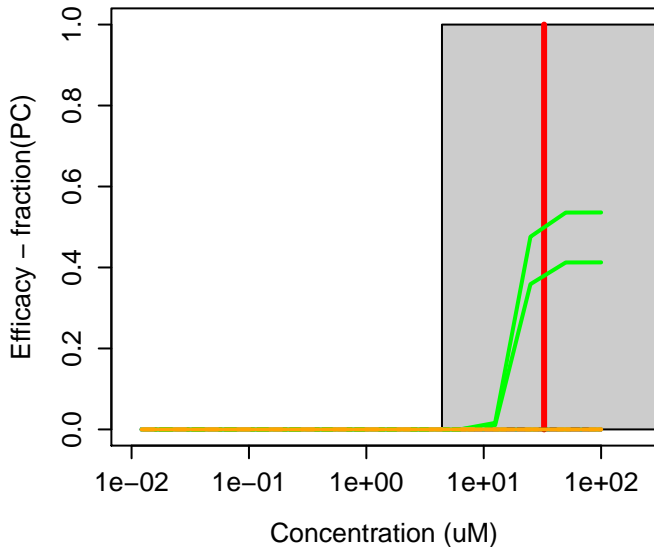

**80-15-9 : Cumene hydroperoxide  
Agonist: 0 Antagonist: 0**

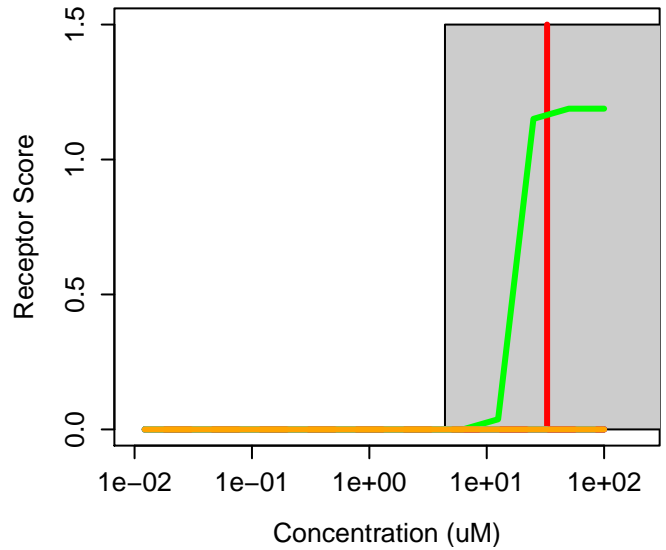

**8018-01-7 : Mancozeb**

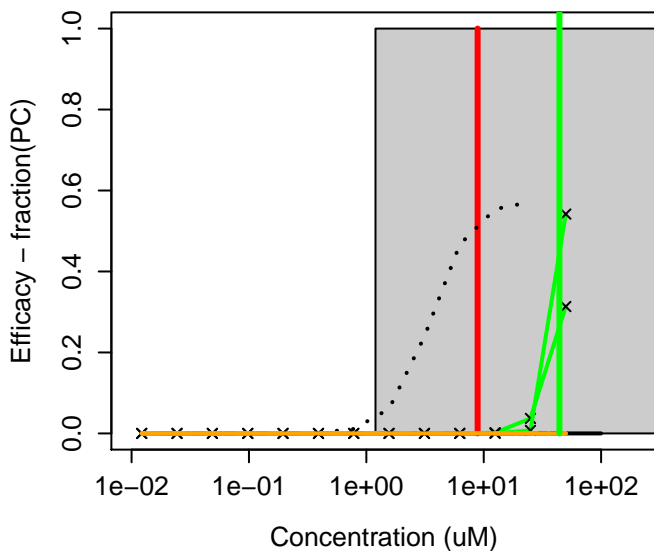

**8018-01-7 : Mancozeb  
Agonist: 0.026 Antagonist: 0.052**

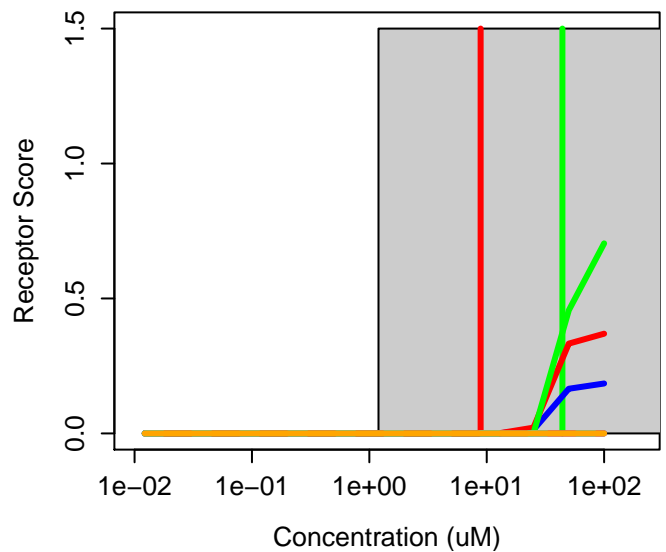

80-26-2 : alpha-Terpinyl acetate

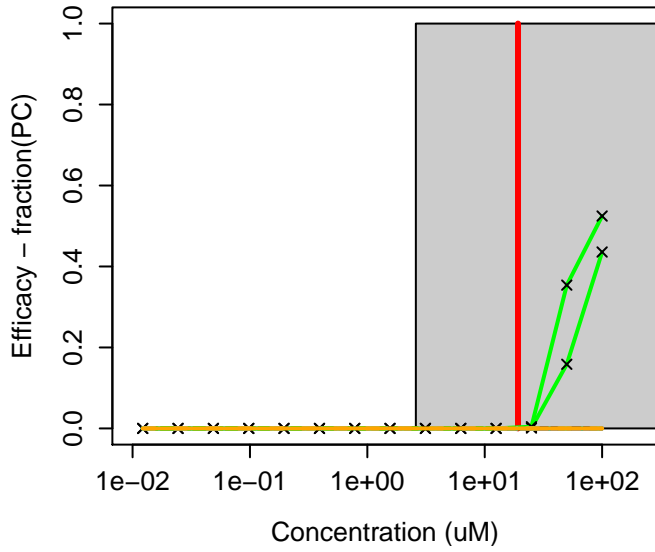

80-26-2 : alpha-Terpinyl acetate  
Agonist: 0 Antagonist: 0

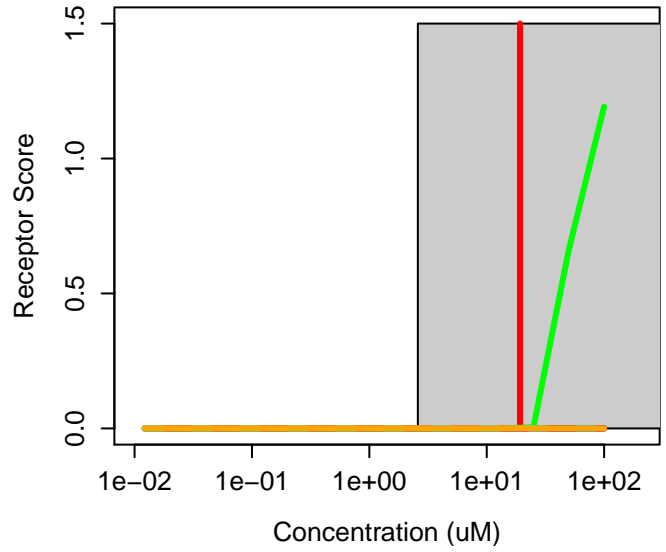

80-27-3 : Terpinyl propionate



80-27-3 : Terpinyl propionate  
Agonist: 0 Antagonist: 0



80-43-3 : Dicumyl peroxide

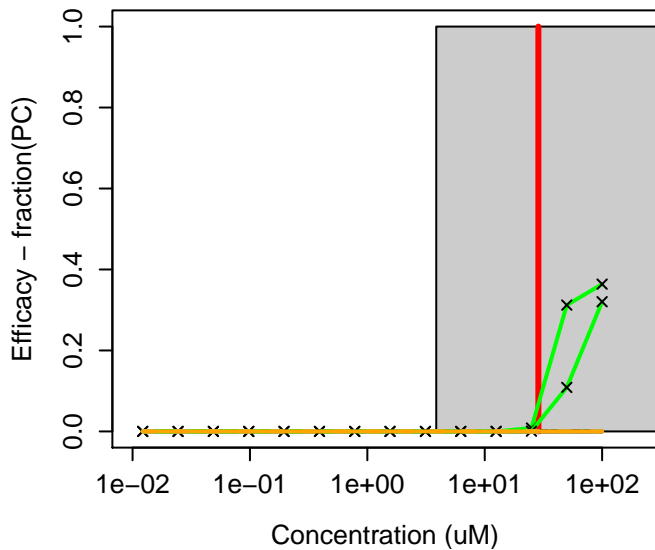

80-43-3 : Dicumyl peroxide  
Agonist: 0 Antagonist: 0

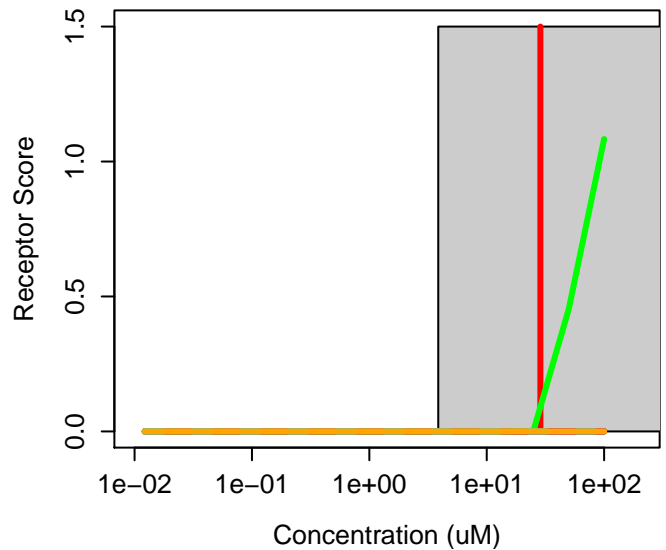

80-46-6 : 4-(2-Methylbutan-2-yl)phenol

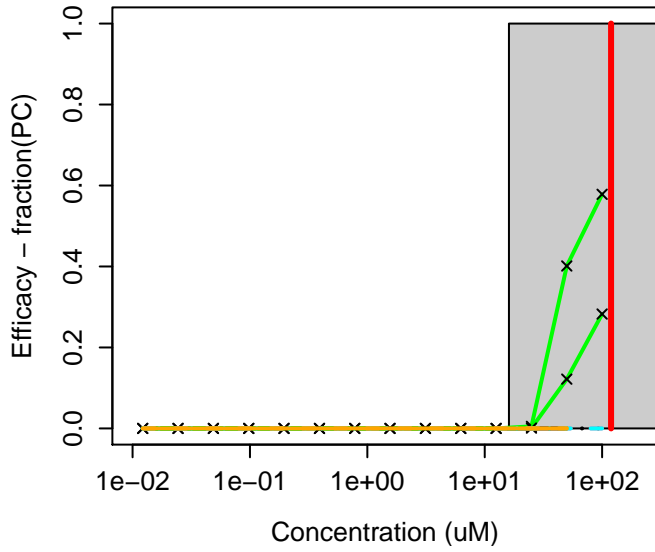

80-46-6 : 4-(2-Methylbutan-2-yl)phenol  
Agonist: 0 Antagonist: 0

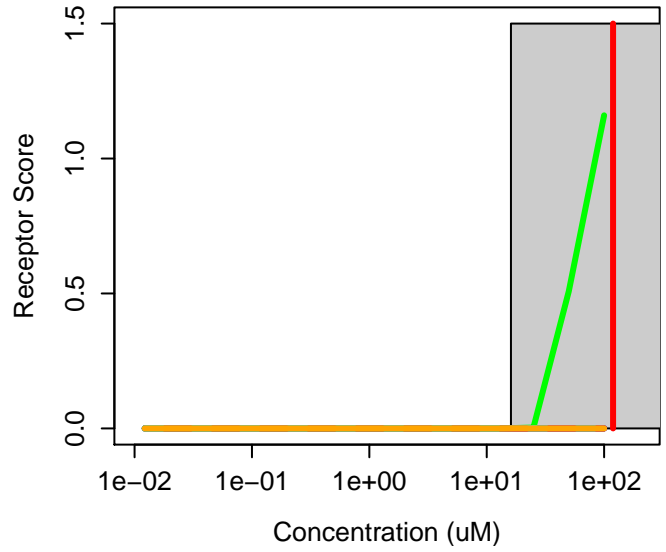

80-54-6 : 3-(4-tert-Butylphenyl)-2-methylpropanoic acid

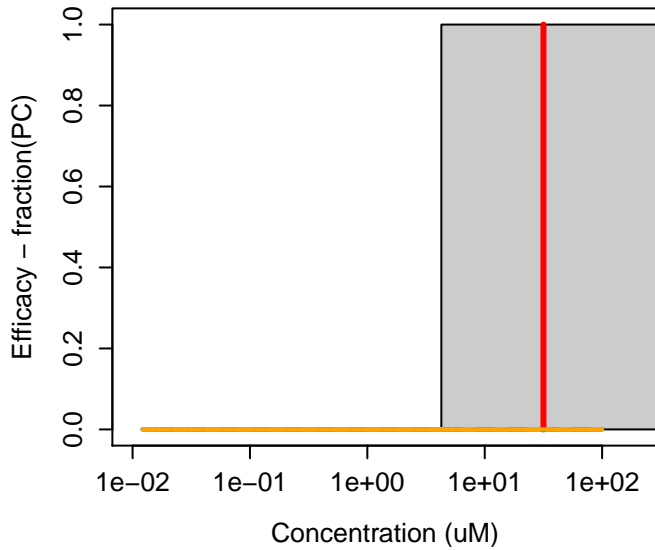

80-54-6 : 3-(4-tert-Butylphenyl)-2-methylpropanoic acid  
Agonist: 0 Antagonist: 0

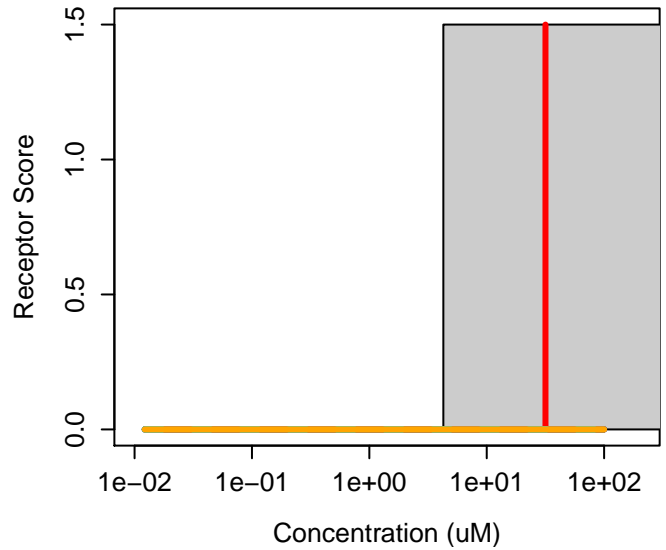

80-56-8 : alpha-Pinene



80-56-8 : alpha-Pinene  
Agonist: 0 Antagonist: 0



80844-07-1 : Etofenprox

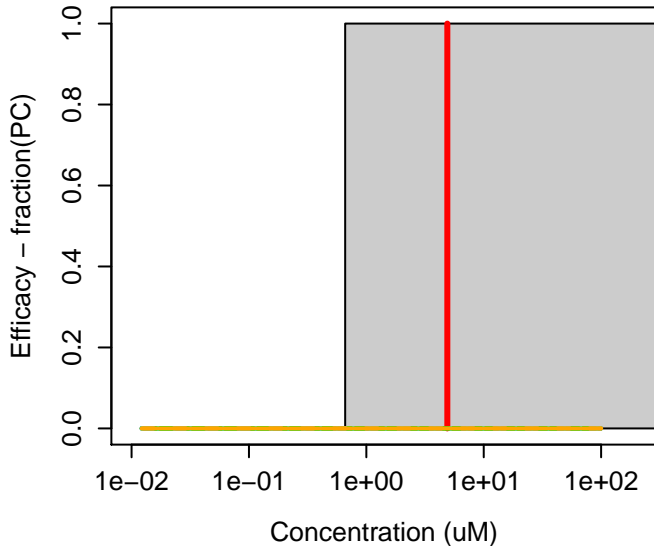

80844-07-1 : Etofenprox  
Agonist: 0 Antagonist: 0

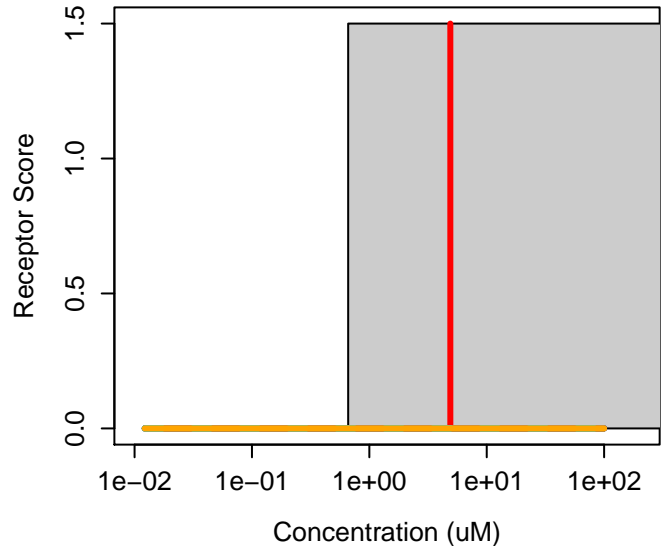

81-07-2 : Saccharin



81-07-2 : Saccharin  
Agonist: 0 Antagonist: 0



81131-70-6 : Pravastatin sodium

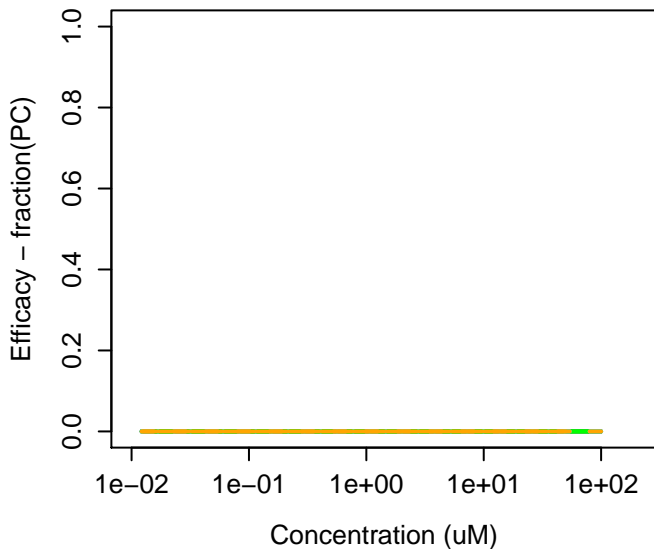

81131-70-6 : Pravastatin sodium  
Agonist: 0 Antagonist: 0



**81334-34-1 : Imazapyr**



**81334-34-1 : Imazapyr  
Agonist: 0 Antagonist: 0**



**81335-37-7 : Imazaquin**



**81335-37-7 : Imazaquin  
Agonist: 0 Antagonist: 0**



**81335-77-5 : Imazethapyr**

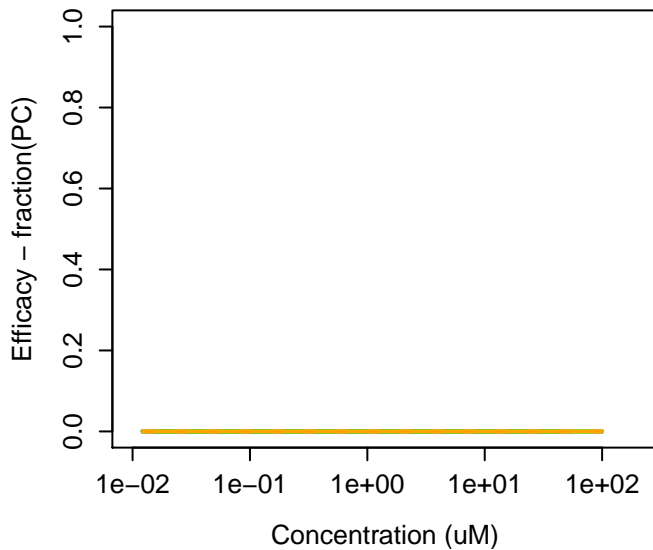

**81335-77-5 : Imazethapyr  
Agonist: 0 Antagonist: 0**



81405-85-8 : Imazamethabenz



81405-85-8 : Imazamethabenz  
Agonist: 0 Antagonist: 0



81406-37-3 : Fluroxypyr-meptyl

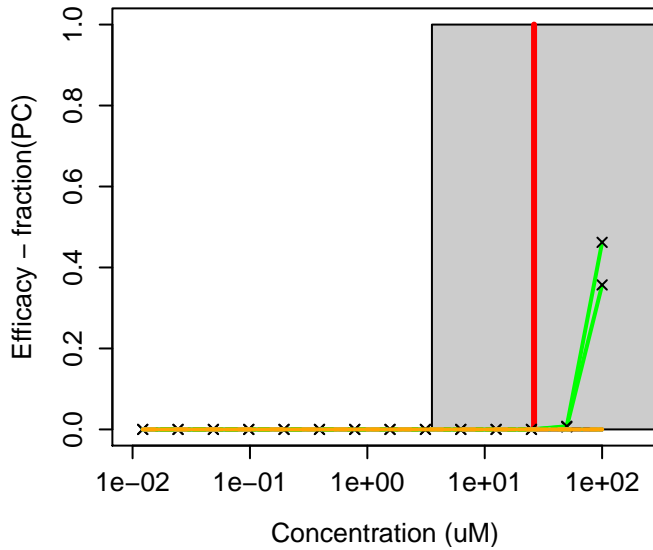

81406-37-3 : Fluroxypyr-meptyl  
Agonist: 0 Antagonist: 0

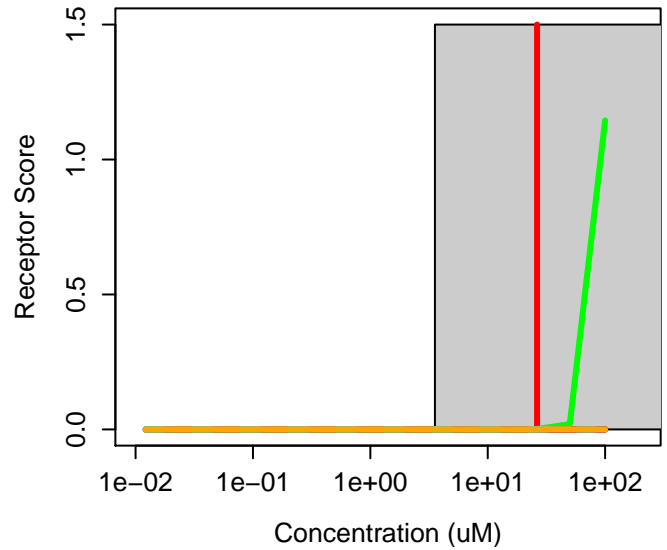

81741-28-8 : Tributyltetradecylphosphonium chlor

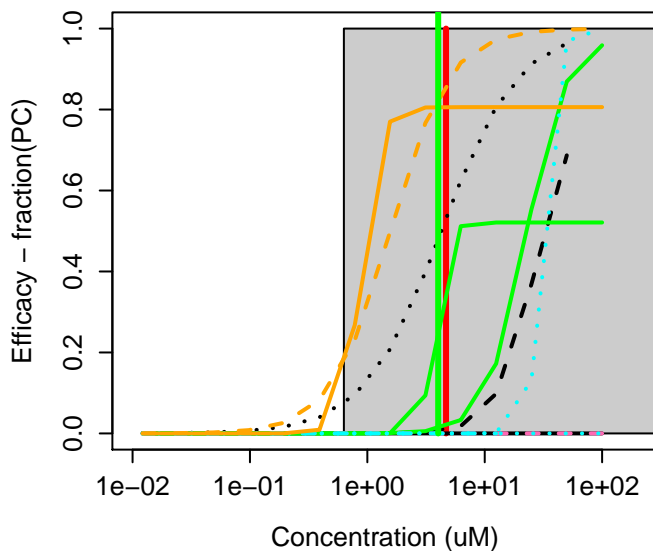

81741-28-8 : Tributyltetradecylphosphonium chlor  
Agonist: 0 Antagonist: 0.52

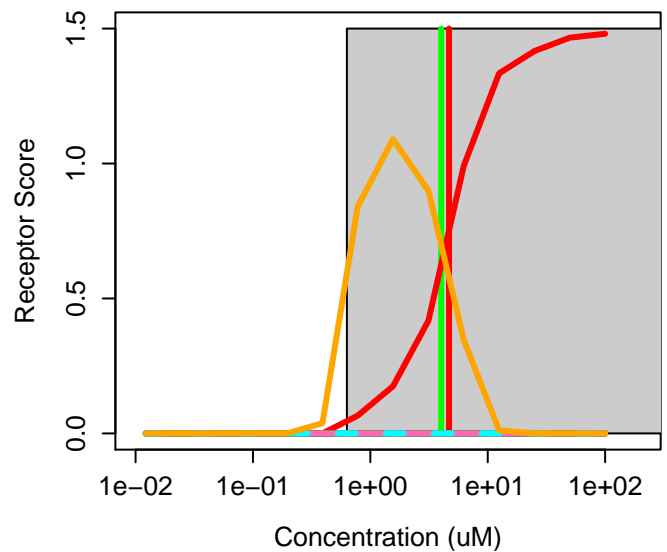

81777-89-1 : Clomazone

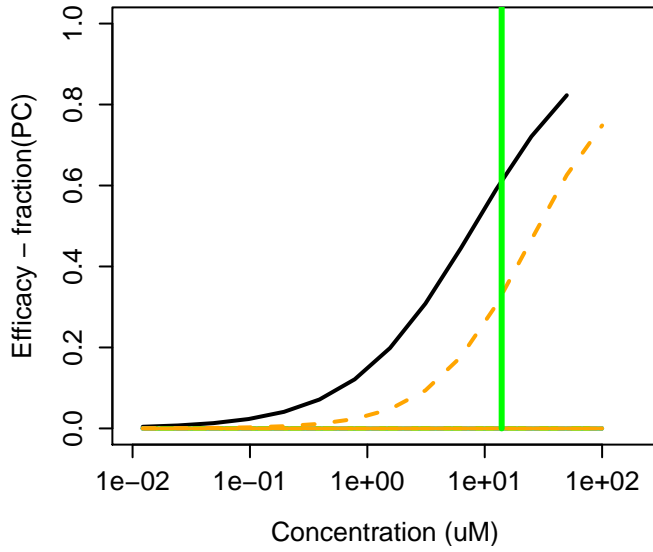

81777-89-1 : Clomazone  
Agonist: 0 Antagonist: 0.12

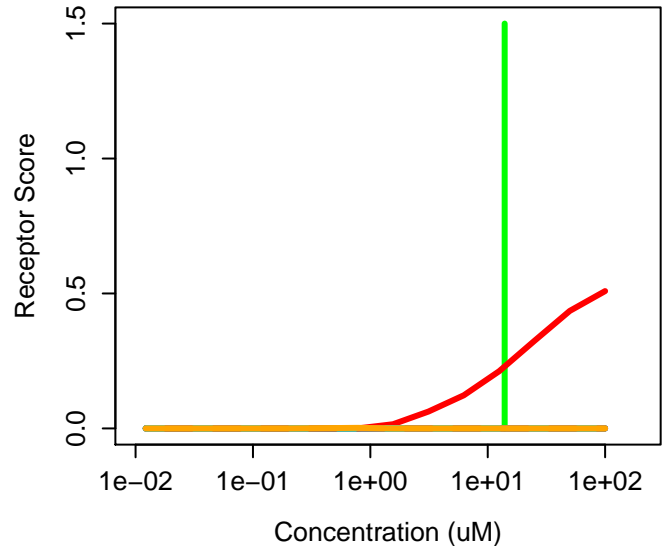

81-81-2 : Warfarin



81-81-2 : Warfarin  
Agonist: 0 Antagonist: 0



818-61-1 : 2-Hydroxyethyl acrylate



818-61-1 : 2-Hydroxyethyl acrylate  
Agonist: 0 Antagonist: 0





**81-88-9 : Rhodamine B**

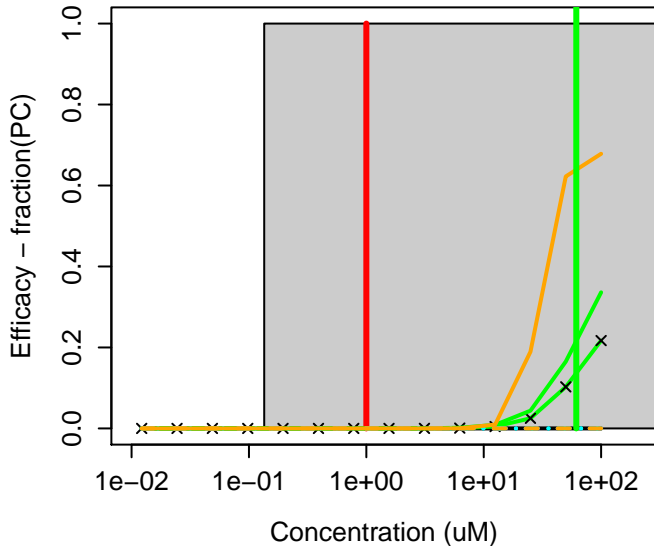

**81-88-9 : Rhodamine B**  
Agonist: 0 Antagonist: 0.042

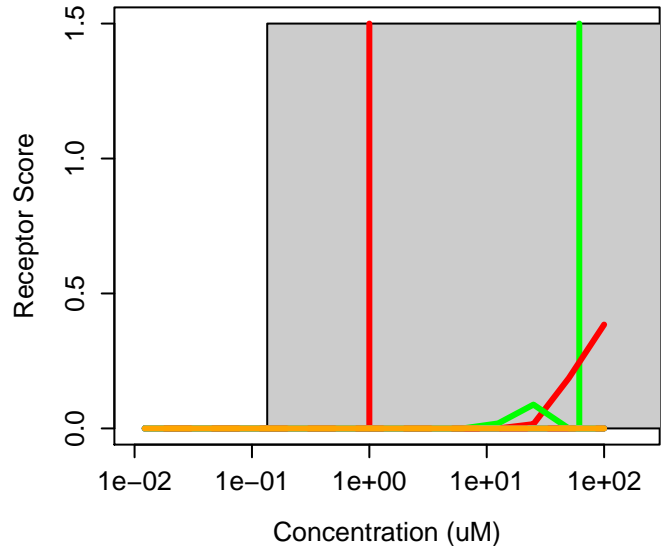

**81-90-3 : Phenolphthalin**

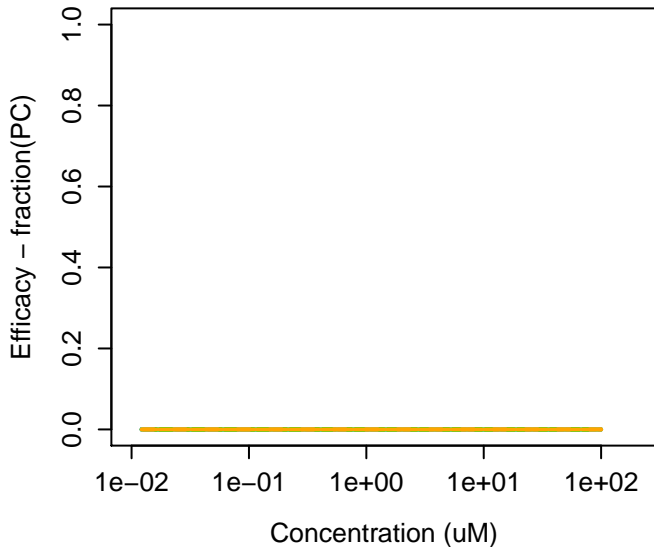

**81-90-3 : Phenolphthalin**  
Agonist: 0 Antagonist: 0



**822-06-0 : 1,6-Diisocyanatohexane**

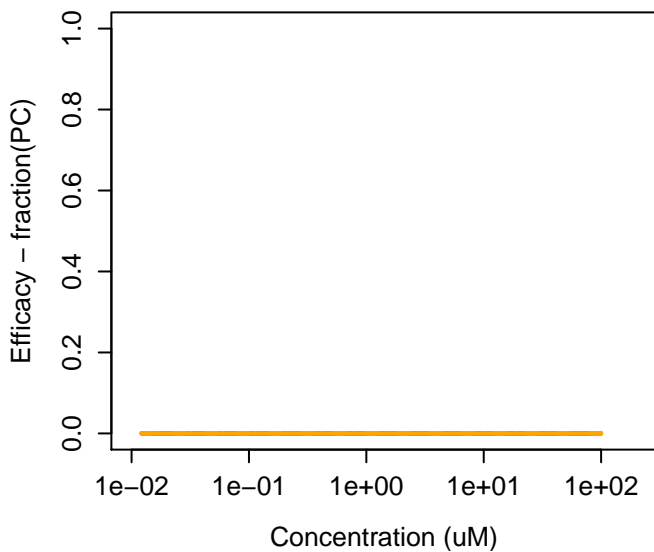

**822-06-0 : 1,6-Diisocyanatohexane**  
Agonist: 0 Antagonist: 0



82385-42-0 : Sodium saccharin hydrate

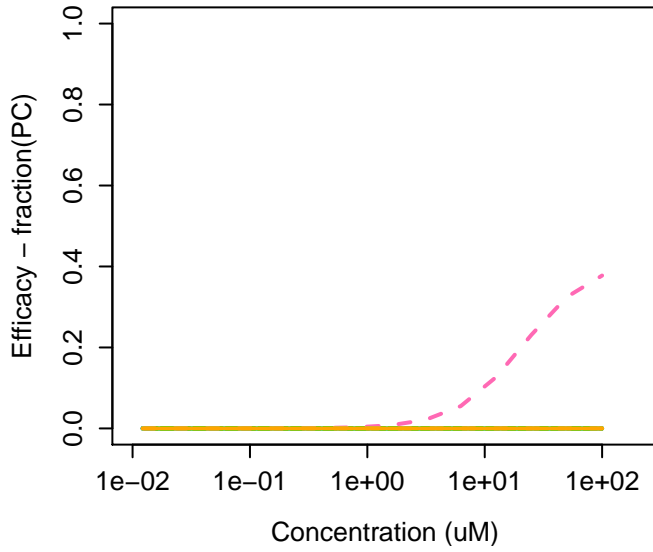

82385-42-0 : Sodium saccharin hydrate  
Agonist: 0 Antagonist: 0

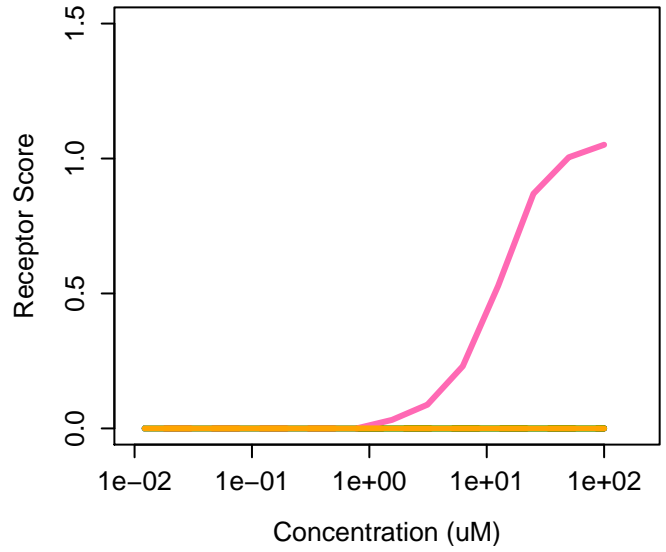

824-39-5 : Sodium 2-nitrophenolate



824-39-5 : Sodium 2-nitrophenolate  
Agonist: 0 Antagonist: 0



82469-79-2 : Butyryl trihexyl citrate

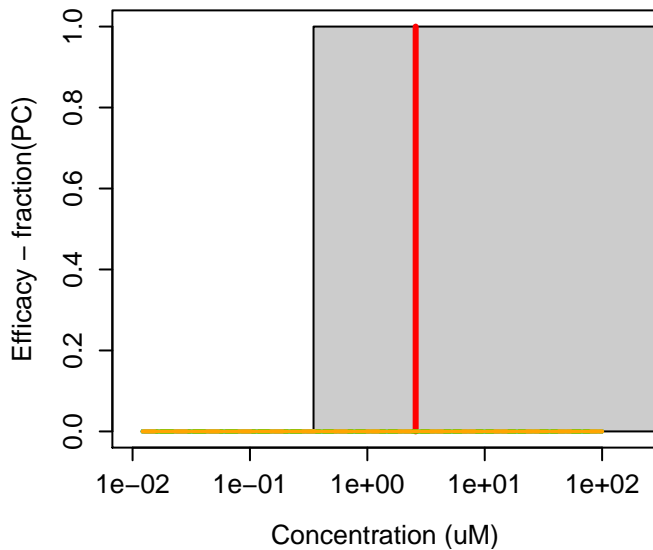

82469-79-2 : Butyryl trihexyl citrate  
Agonist: 0 Antagonist: 0

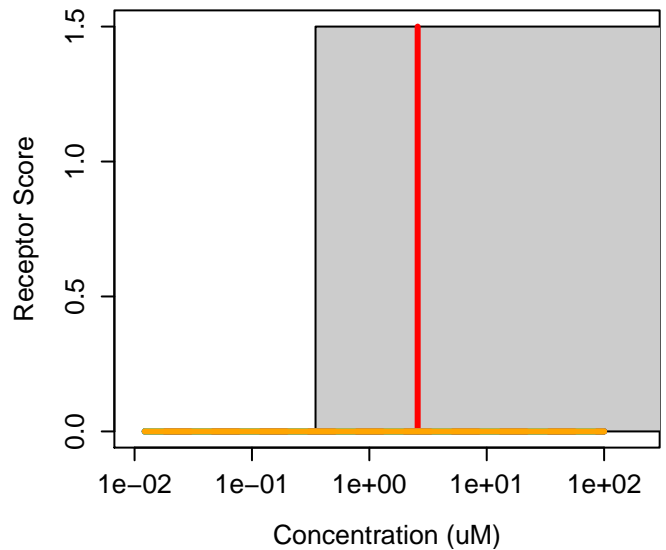

824-78-2 : Sodium 4-nitrophenolate

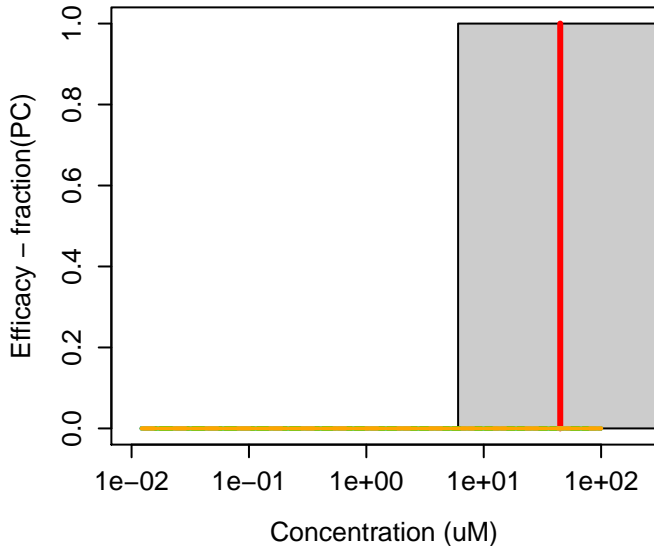

824-78-2 : Sodium 4-nitrophenolate  
Agonist: 0 Antagonist: 0

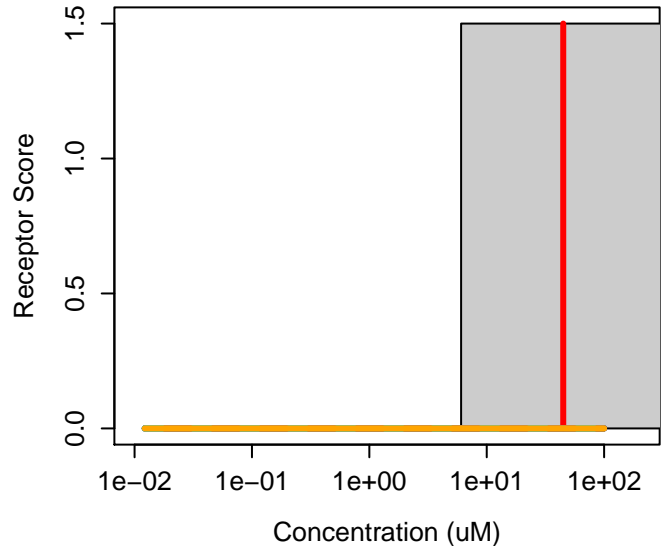

82558-50-7 : Isoxaben

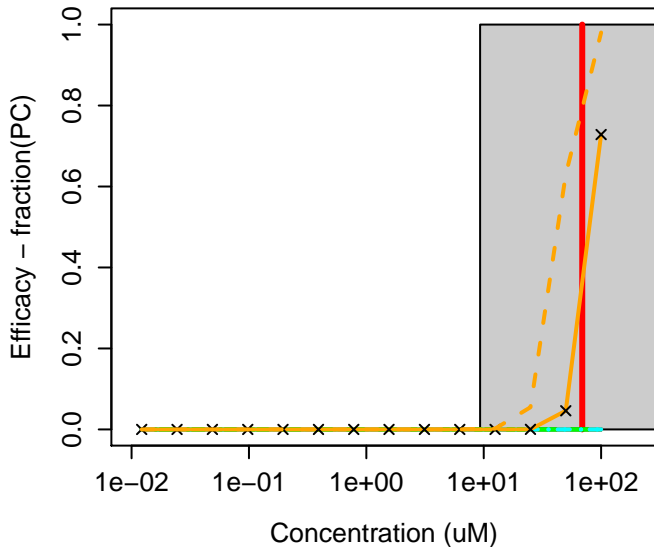

82558-50-7 : Isoxaben  
Agonist: 0 Antagonist: 0

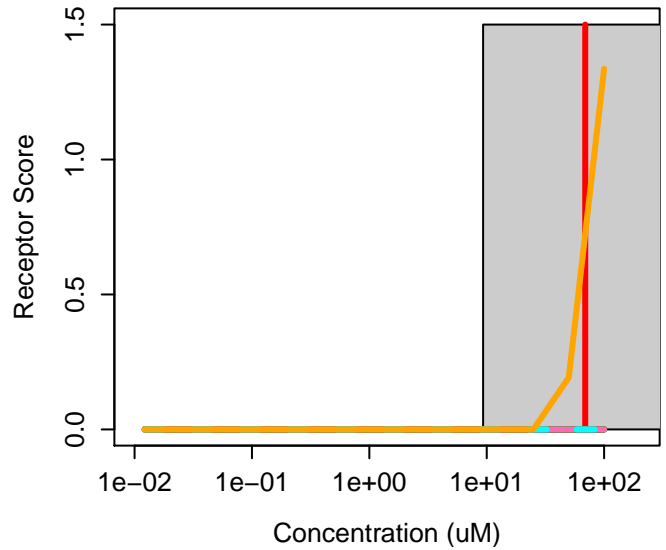

825643-57-0 : PharmaGSID\_48513

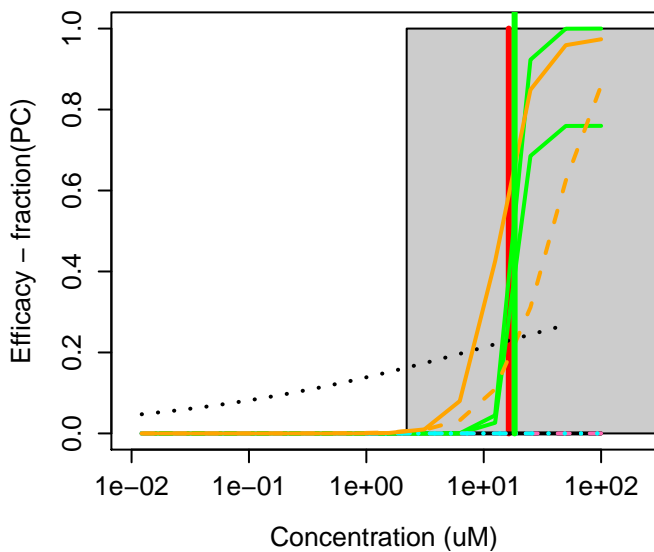

825643-57-0 : PharmaGSID\_48513  
Agonist: 0 Antagonist: 0.3

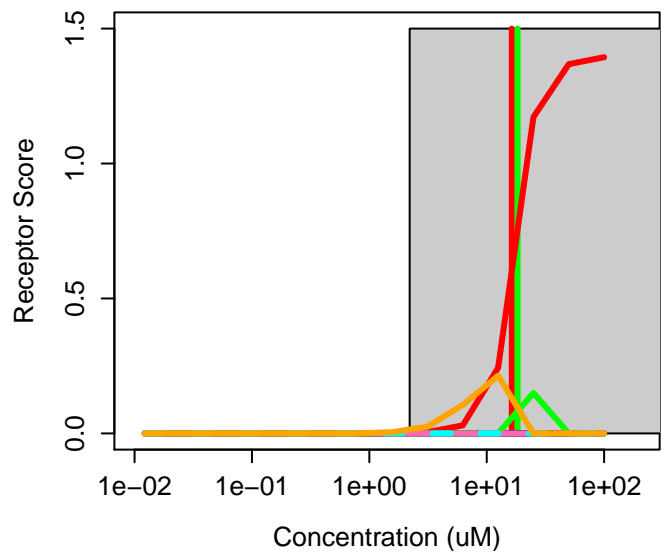

82640-04-8 : Raloxifene hydrochloride

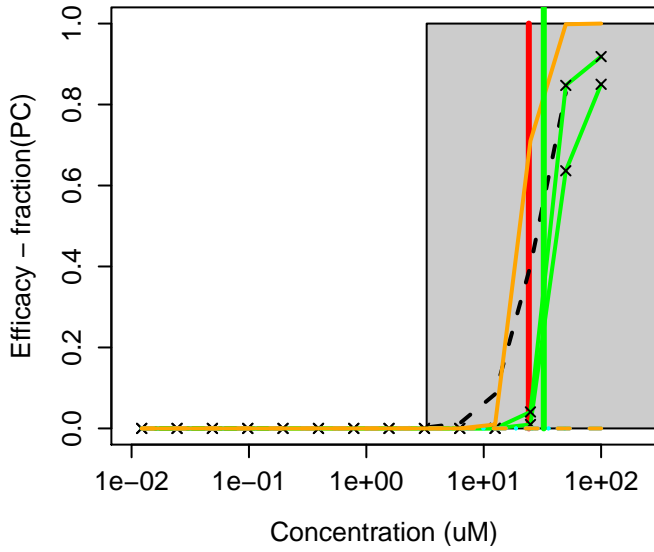

82640-04-8 : Raloxifene hydrochloride  
Agonist: 0 Antagonist: 0.22

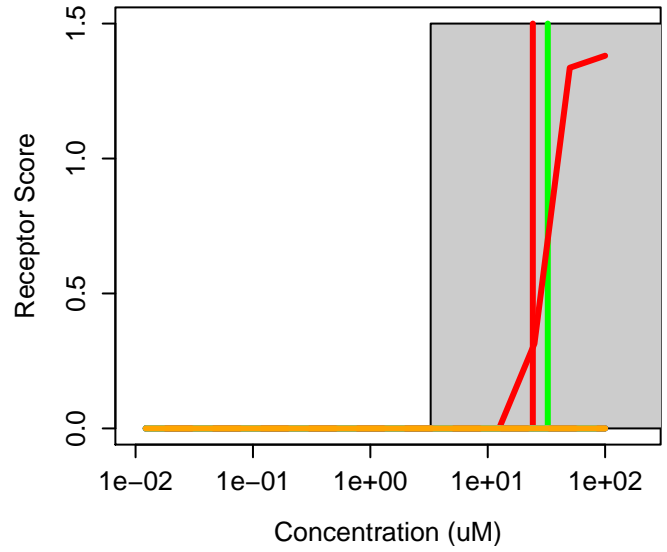

82657-04-3 : Bifenthrin

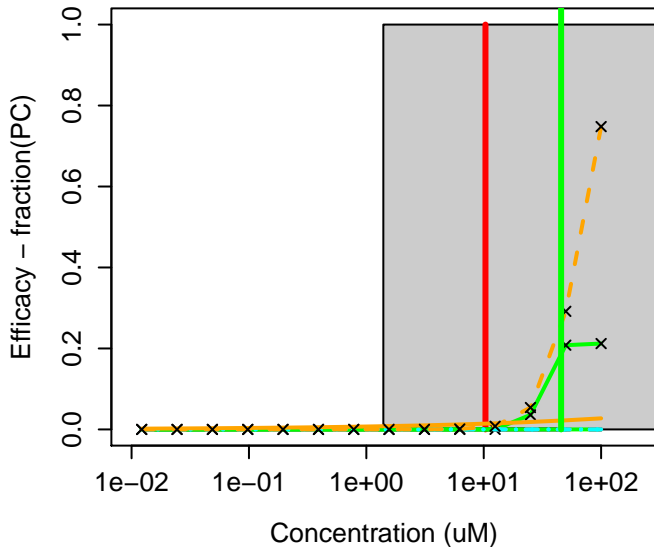

82657-04-3 : Bifenthrin  
Agonist: 0 Antagonist: 0.02

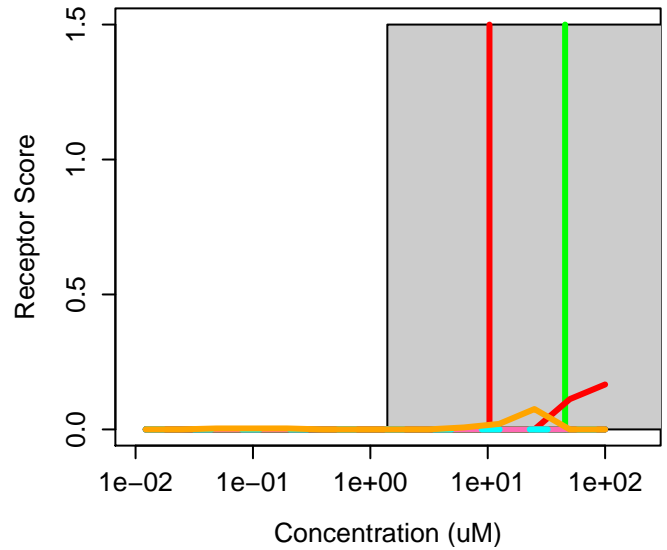

826-62-0 : 2-Norbornene-5,6-dicarboxylic anhydr



826-62-0 : 2-Norbornene-5,6-dicarboxylic anhydr  
Agonist: 0 Antagonist: 0



**82-68-8 : Pentachloronitrobenzene**

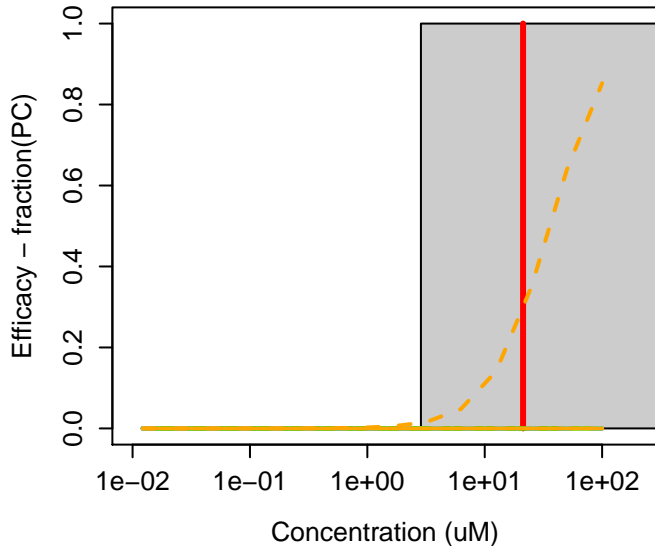

**82-68-8 : Pentachloronitrobenzene  
Agonist: 0 Antagonist: 0**

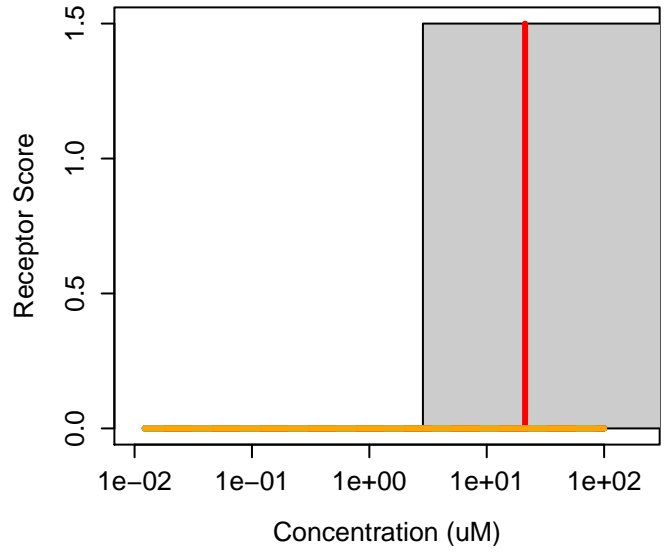

**827-19-0 : Sodium 2,5-dimethylbenzenesulfonat**



**827-19-0 : Sodium 2,5-dimethylbenzenesulfonat  
Agonist: 0 Antagonist: 0**



**827-21-4 : Sodium m-xylene-4-sulfonate**



**827-21-4 : Sodium m-xylene-4-sulfonate  
Agonist: 0 Antagonist: 0**



828-00-2 : Dimethoxane

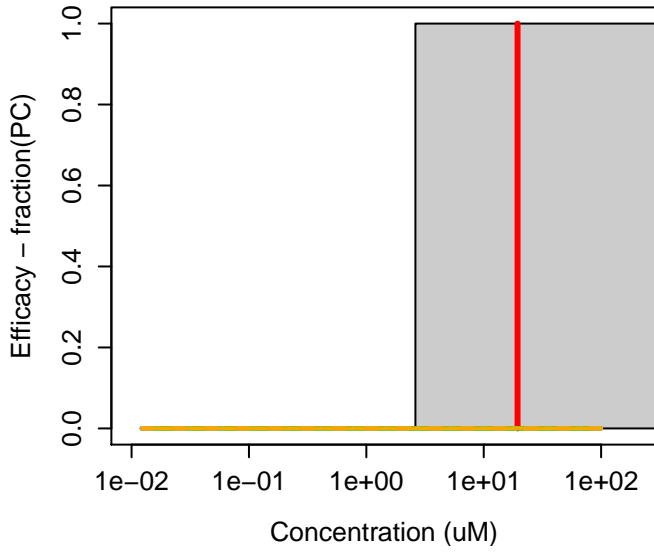

828-00-2 : Dimethoxane  
Agonist: 0 Antagonist: 0

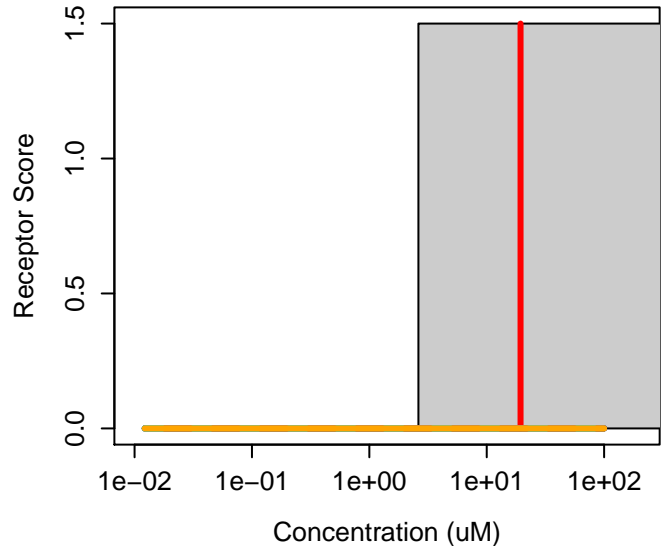

83-32-9 : Acenaphthene



83-32-9 : Acenaphthene  
Agonist: 0 Antagonist: 0



83-41-0 : 1,2-Dimethyl-3-nitrobenzene



83-41-0 : 1,2-Dimethyl-3-nitrobenzene  
Agonist: 0 Antagonist: 0



834-12-8 : Ametryn



834-12-8 : Ametryn  
Agonist: 0 Antagonist: 0



83657-24-3 : Diniconazole

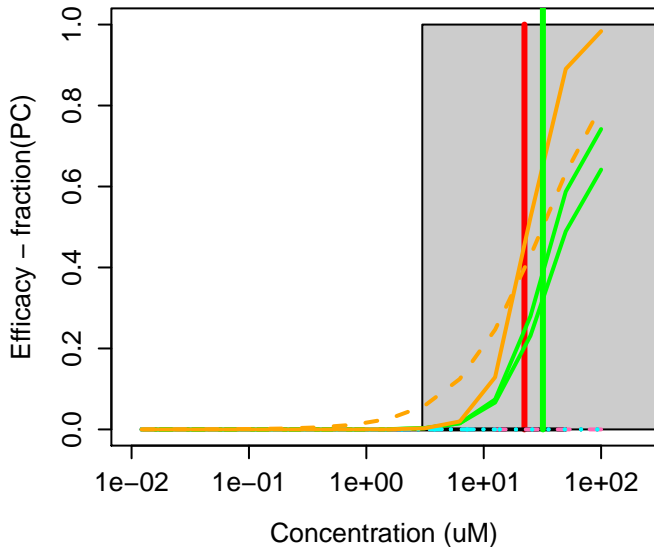

83657-24-3 : Diniconazole  
Agonist: 0 Antagonist: 0.18

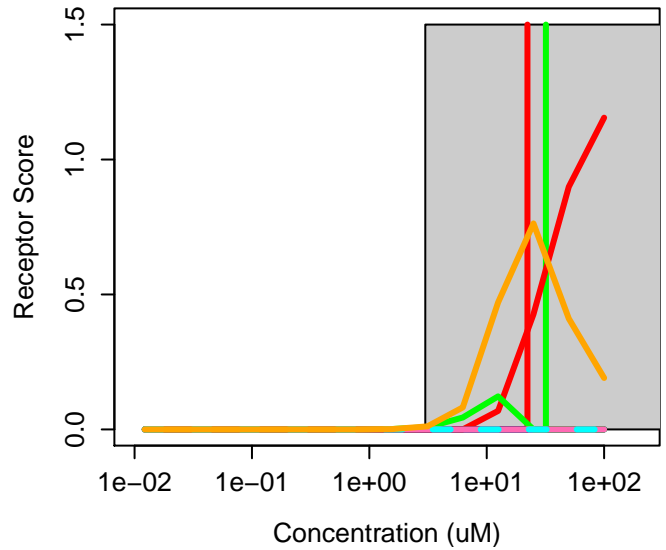

83-67-0 : Theobromine

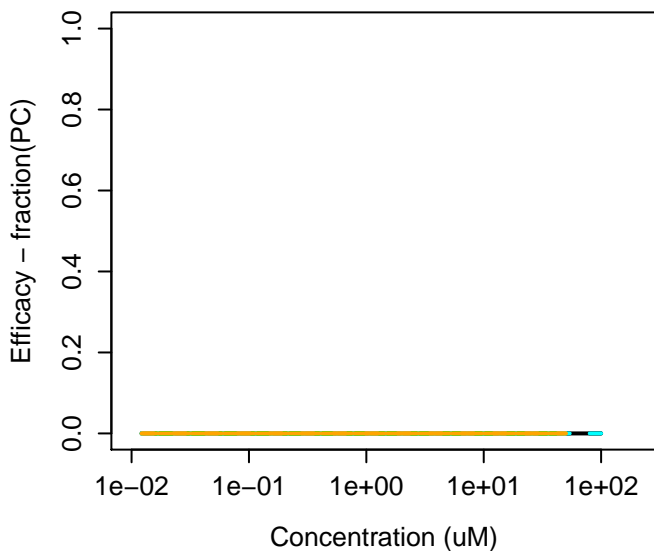

83-67-0 : Theobromine  
Agonist: 0 Antagonist: 0



83-79-4 : Rotenone

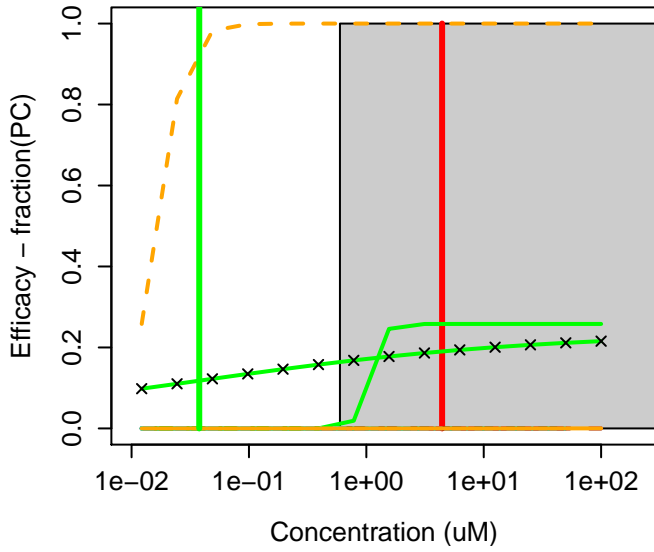

83-79-4 : Rotenone  
Agonist: 0 Antagonist: 0.2

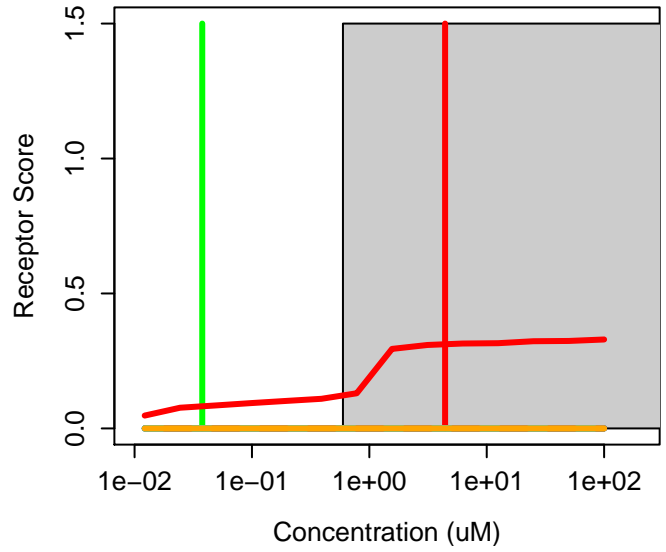

83834-59-7 : 2-Ethylhexyl trans-4-methoxycinnar Agonist: 0 Antagonist: 0

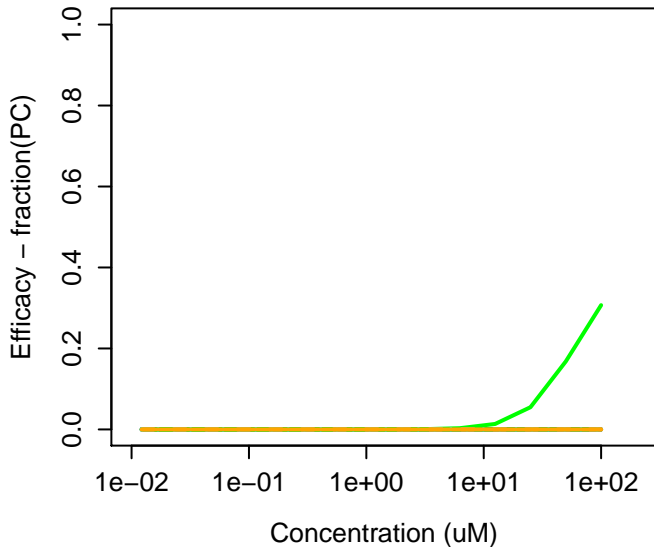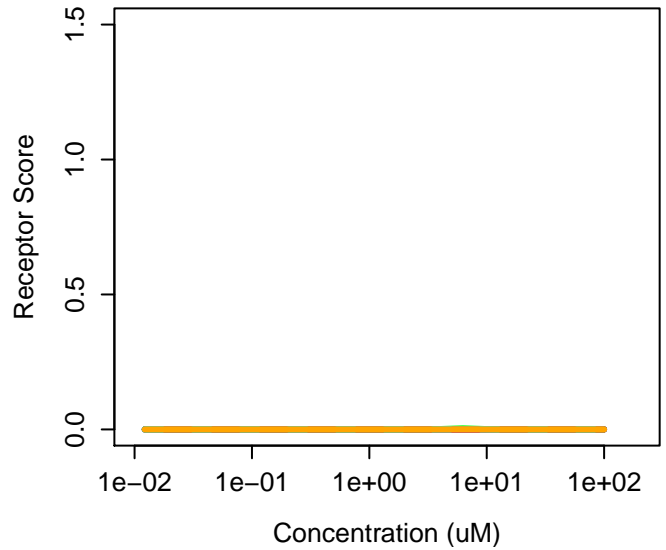

83-88-5 : Riboflavin

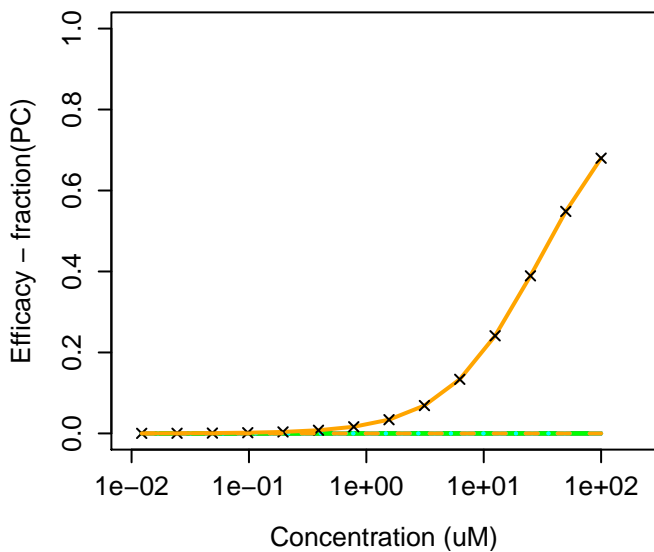

83-88-5 : Riboflavin  
Agonist: 0 Antagonist: 0





838-85-7 : Diphenyl phosphate



838-85-7 : Diphenyl phosphate  
Agonist: 0 Antagonist: 0



838-88-0 : 4,4'-Methylenebis(2-methylaniline)

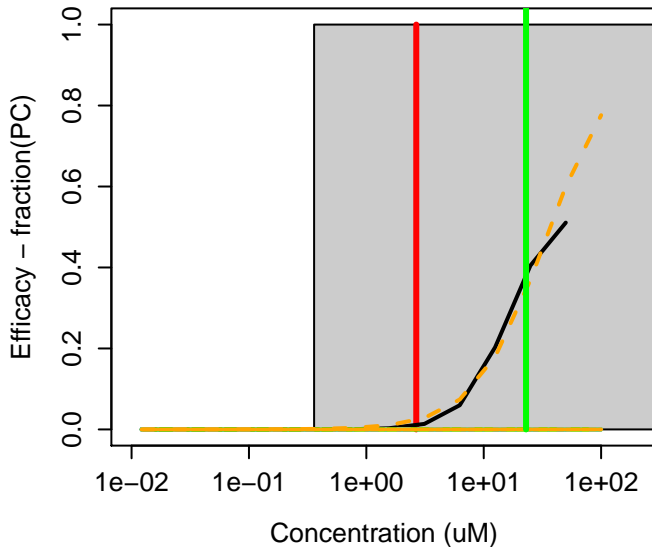

838-88-0 : 4,4'-Methylenebis(2-methylaniline)  
Agonist: 0 Antagonist: 0.067

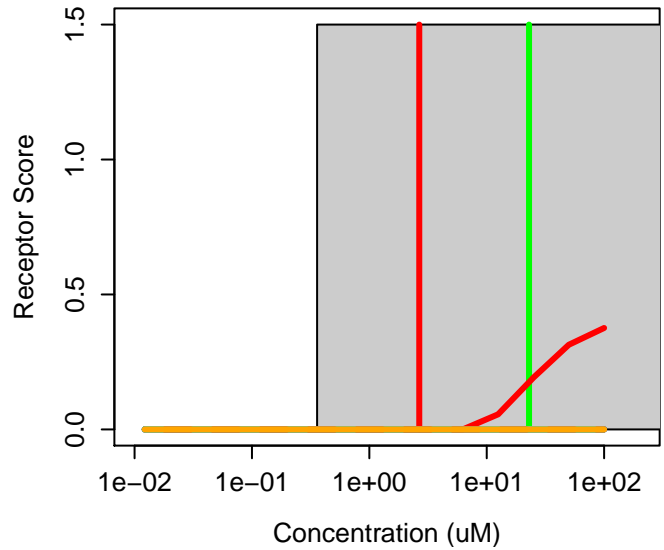

84087-01-4 : Quinclorac



84087-01-4 : Quinclorac  
Agonist: 0 Antagonist: 0



**84-16-2 : meso-Hexestrol**

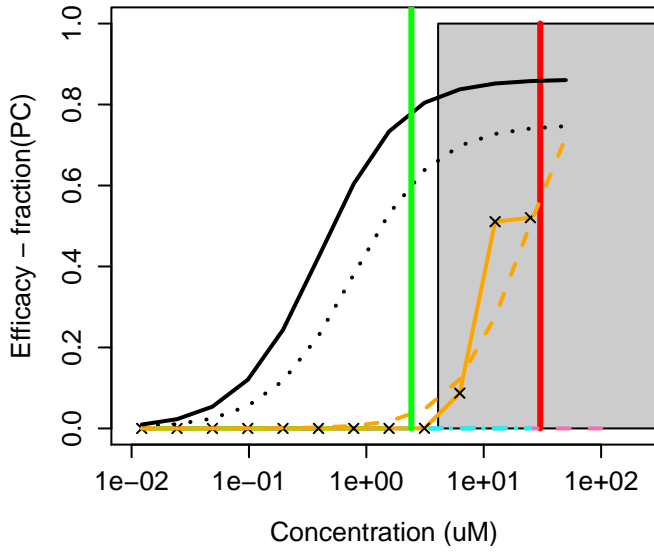

**84-16-2 : meso-Hexestrol  
Agonist: 0 Antagonist: 0.34**

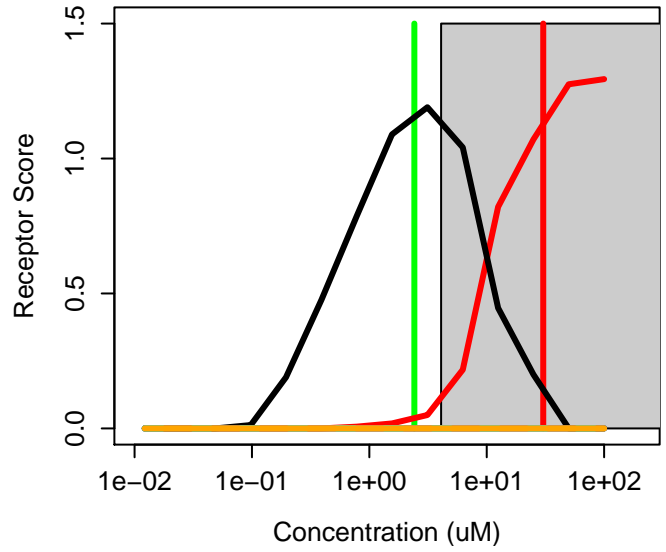

**842-07-9 : C.I. Solvent Yellow 14**

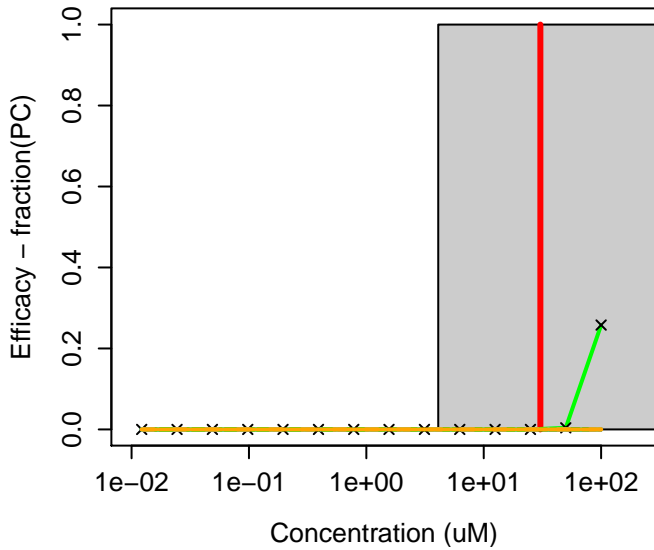

**842-07-9 : C.I. Solvent Yellow 14  
Agonist: 0 Antagonist: 0**

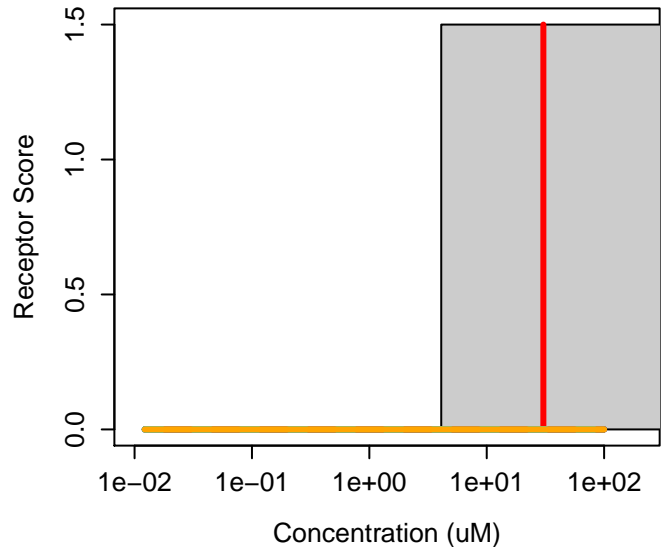

**84371-65-3 : Mifepristone**

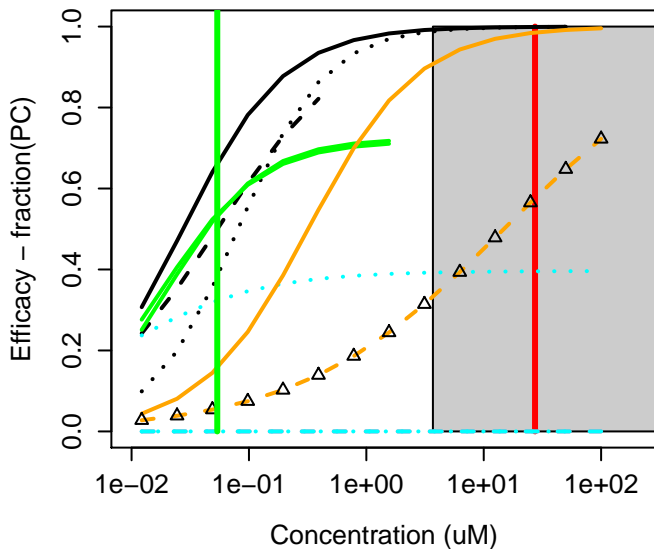

**84371-65-3 : Mifepristone  
Agonist: 0.0013 Antagonist: 1.2**

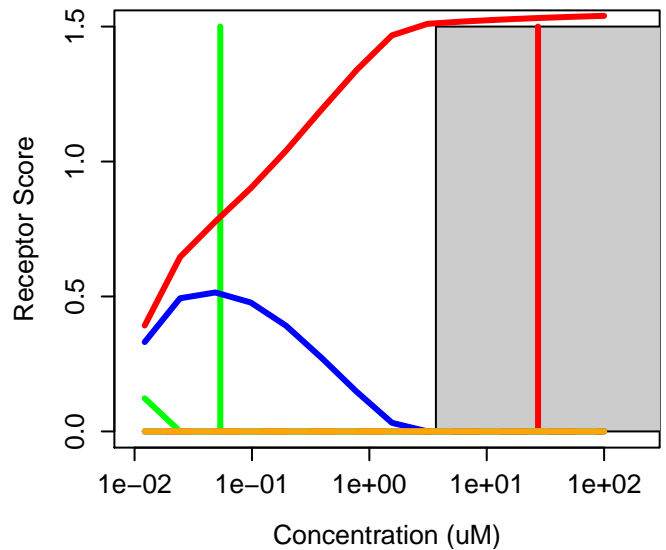

84-61-7 : Dicyclohexyl phthalate

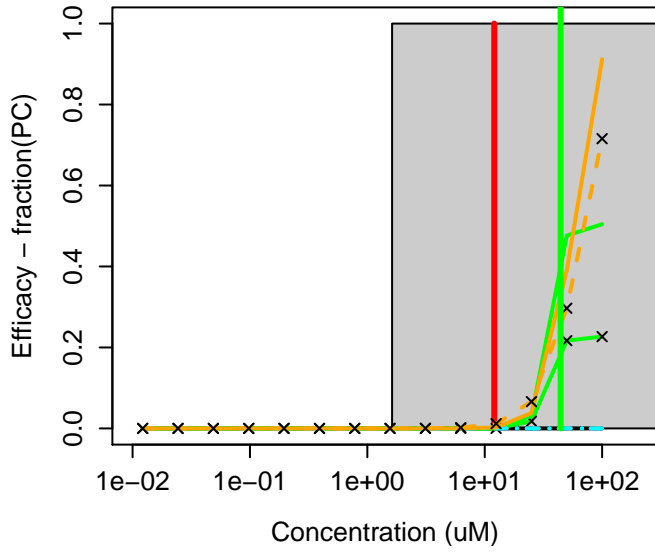

84-61-7 : Dicyclohexyl phthalate  
Agonist: 0 Antagonist: 0.074

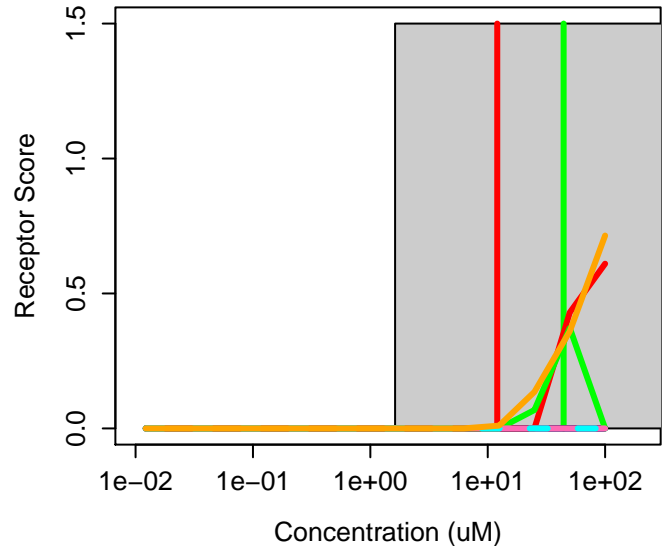

84-66-2 : Diethyl phthalate

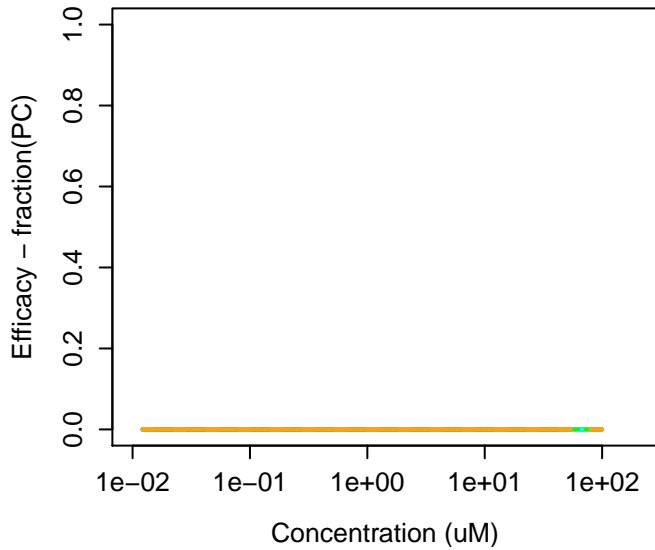

84-66-2 : Diethyl phthalate  
Agonist: 0 Antagonist: 0



84-69-5 : Diisobutyl phthalate

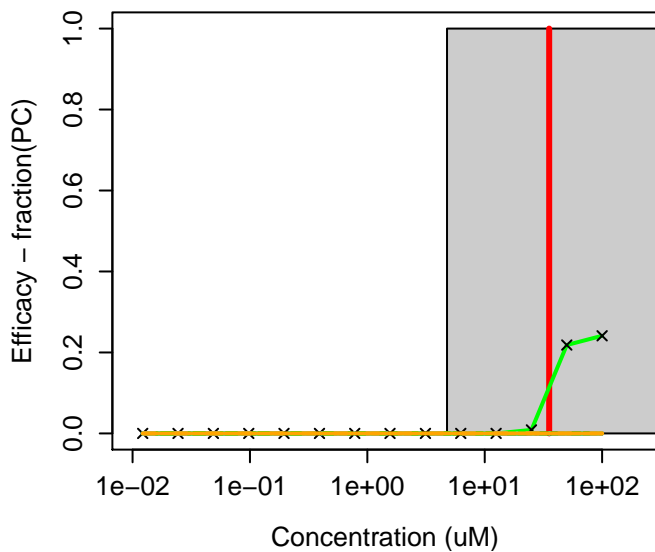

84-69-5 : Diisobutyl phthalate  
Agonist: 0 Antagonist: 0

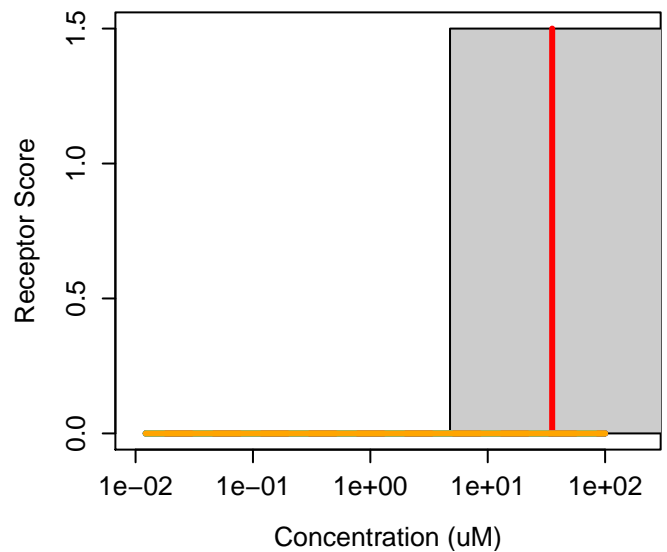

**84-74-2 : Dibutyl phthalate**

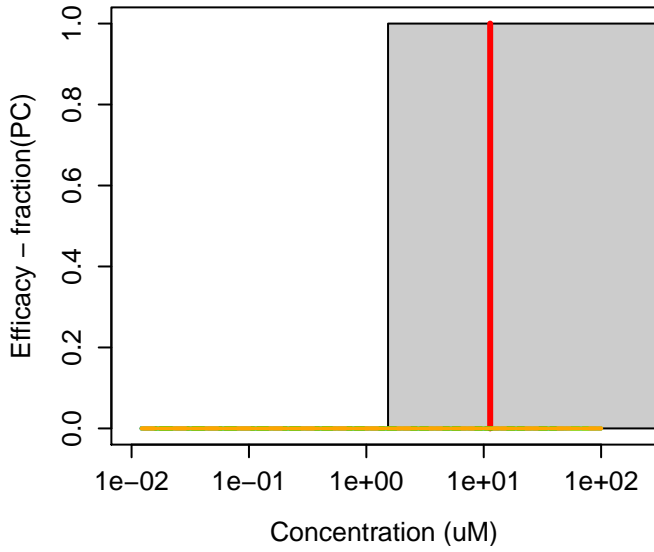

**84-74-2 : Dibutyl phthalate  
Agonist: 0 Antagonist: 0**

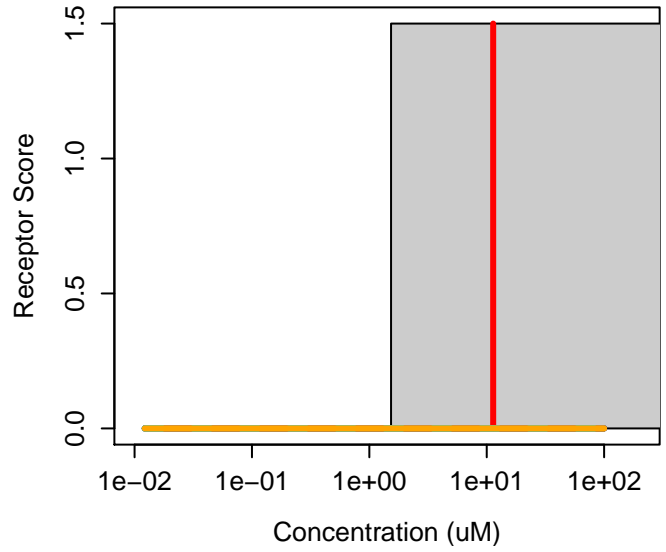

**84-75-3 : Dihexyl phthalate**

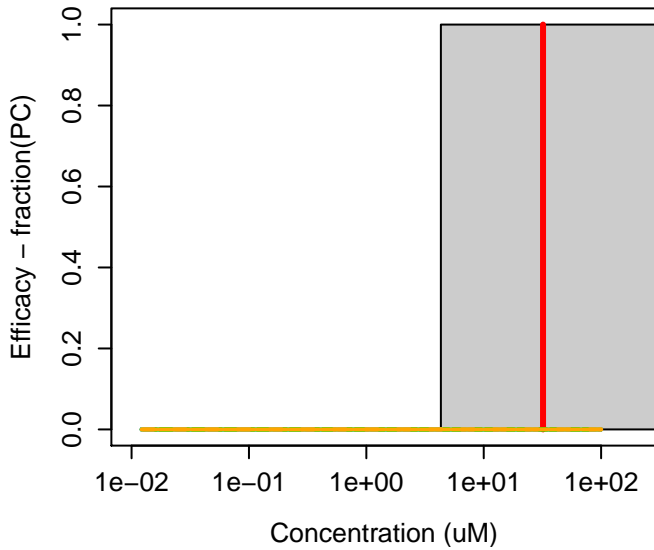

**84-75-3 : Dihexyl phthalate  
Agonist: 0 Antagonist: 0**

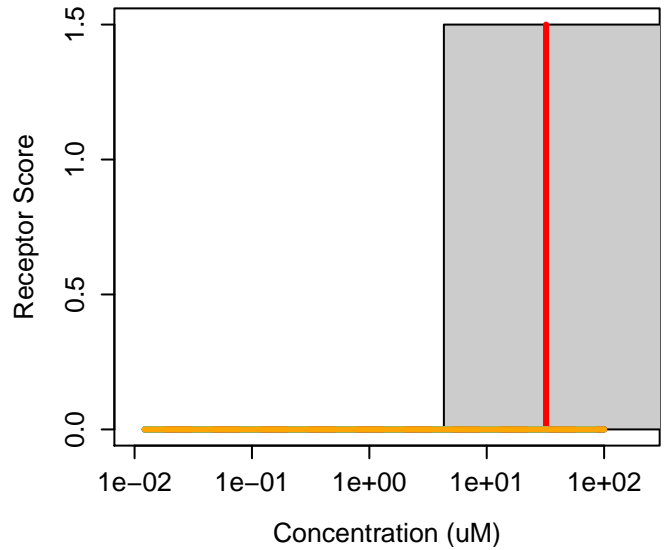

**84852-15-3 : 4-Nonylphenol, branched**

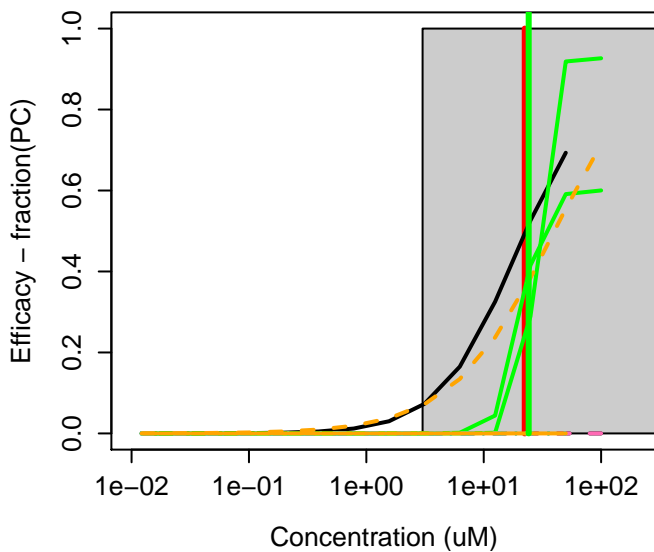

**84852-15-3 : 4-Nonylphenol, branched  
Agonist: 0 Antagonist: 0.23**

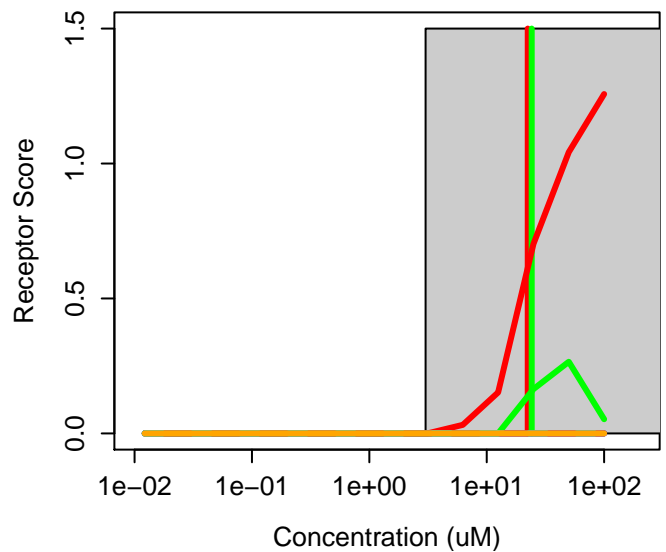

**85-01-8 : Phenanthrene**



**85-01-8 : Phenanthrene  
Agonist: 0 Antagonist: 0**



**851916-42-2 : MK-812**



**851916-42-2 : MK-812  
Agonist: 0 Antagonist: 0**



**85264-33-1 : (3,5-Dimethyl-1H-pyrazol-1-yl)meth: 85264-33-1 : (3,5-Dimethyl-1H-pyrazol-1-yl)meth:  
Agonist: 0 Antagonist: 0**



**85-40-5 : 1,2,3,6-Tetrahydrophthalimide**



**85-40-5 : 1,2,3,6-Tetrahydrophthalimide  
Agonist: 0 Antagonist: 0**



**85-41-6 : Phthalimide**



**85-41-6 : Phthalimide  
Agonist: 0 Antagonist: 0**



**507-79-5 : Phthalic acid, diundecyl ester, branched a507-79-5 : Phthalic acid, diundecyl ester, branched a  
Agonist: 0 Antagonist: 0**



85509-19-9 : Flusilazole

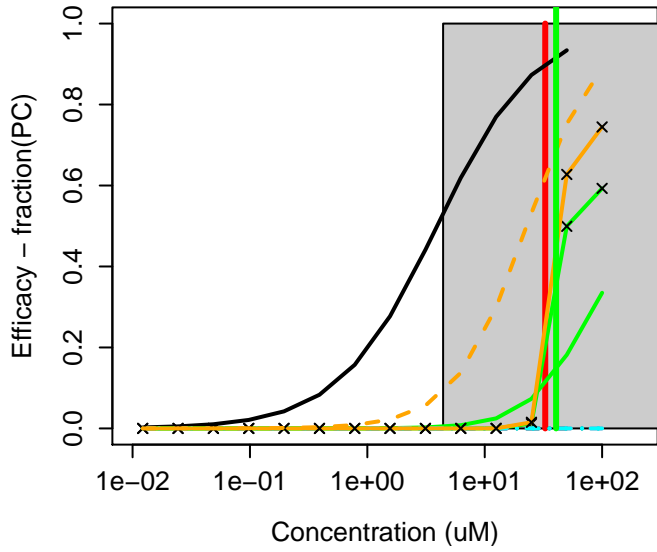

85509-19-9 : Flusilazole  
Agonist: 0 Antagonist: 0.25

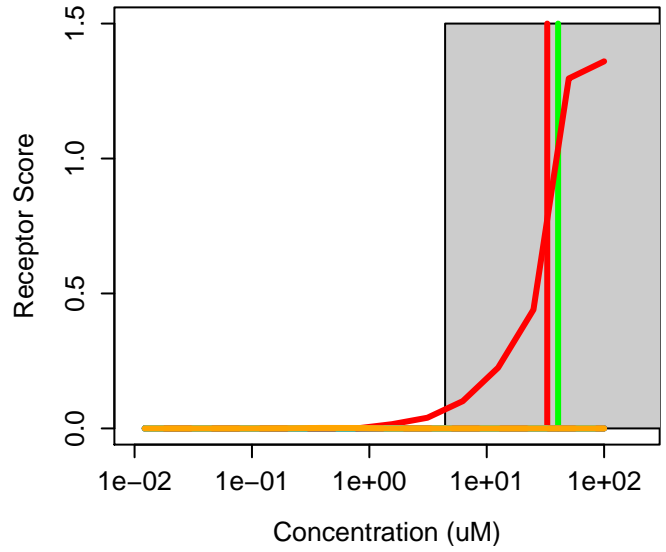

85532-75-8 : PK 11195

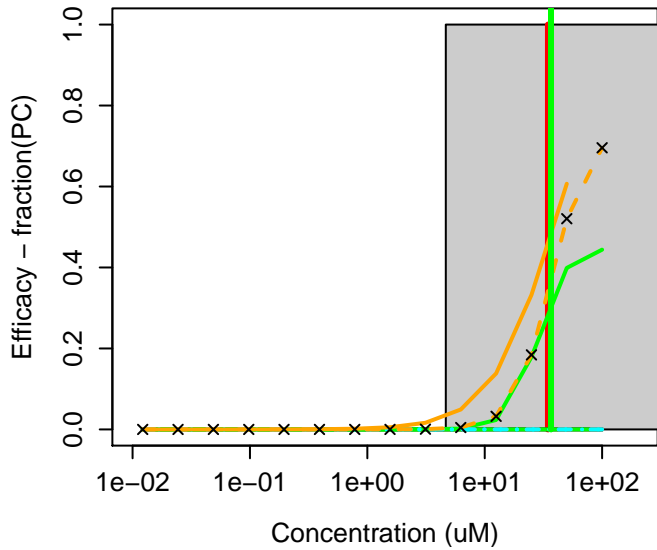

85532-75-8 : PK 11195  
Agonist: 0 Antagonist: 0.059

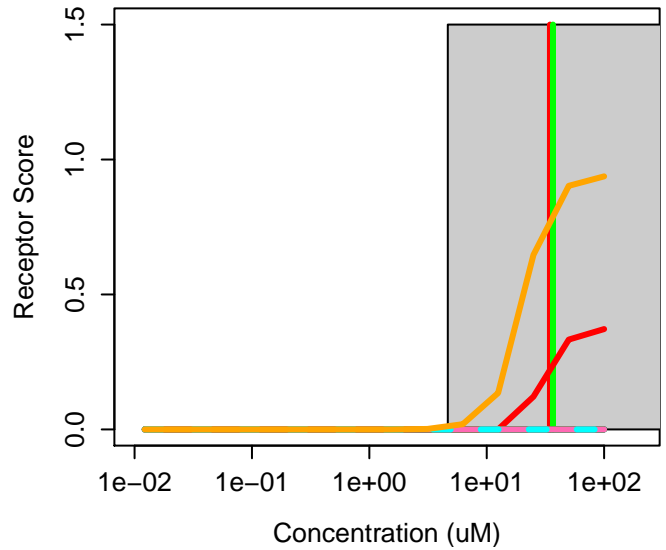

85-68-7 : Benzyl butyl phthalate

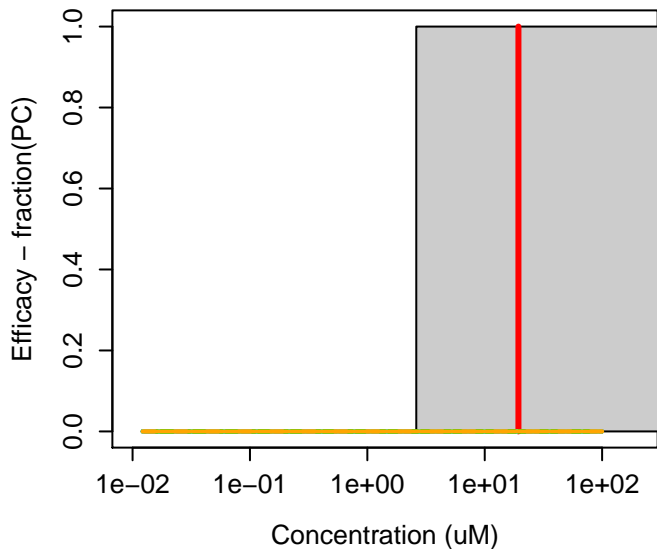

85-68-7 : Benzyl butyl phthalate  
Agonist: 0 Antagonist: 0

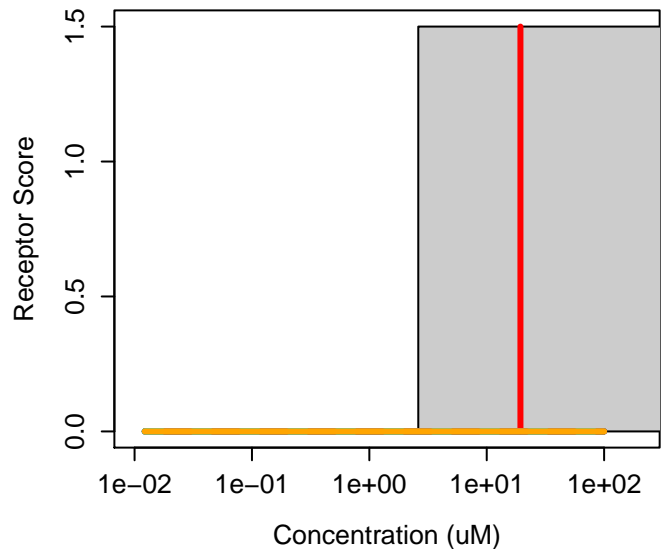

**860-22-0 : C.I. Acid Blue 74**

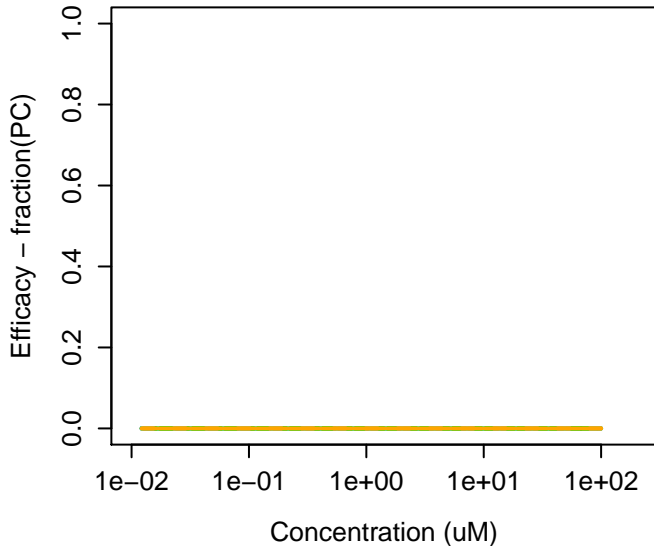

**860-22-0 : C.I. Acid Blue 74**  
**Agonist: 0 Antagonist: 0**



**862243-29-6 : AVE9423**

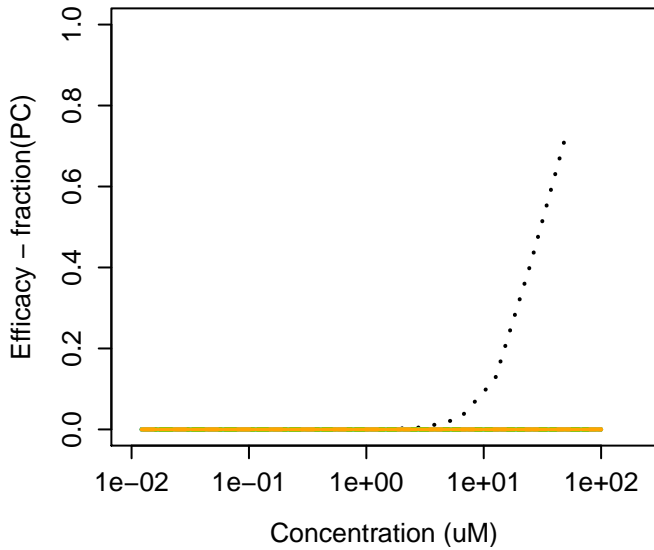

**862243-29-6 : AVE9423**  
**Agonist: 0 Antagonist: 0**



**86-30-6 : N-Nitrosodiphenylamine**



**86-30-6 : N-Nitrosodiphenylamine**  
**Agonist: 0 Antagonist: 0**





86386-73-4 : Fluconazole



86386-73-4 : Fluconazole  
Agonist: 0 Antagonist: 0



864283-48-7 : GSK232420A

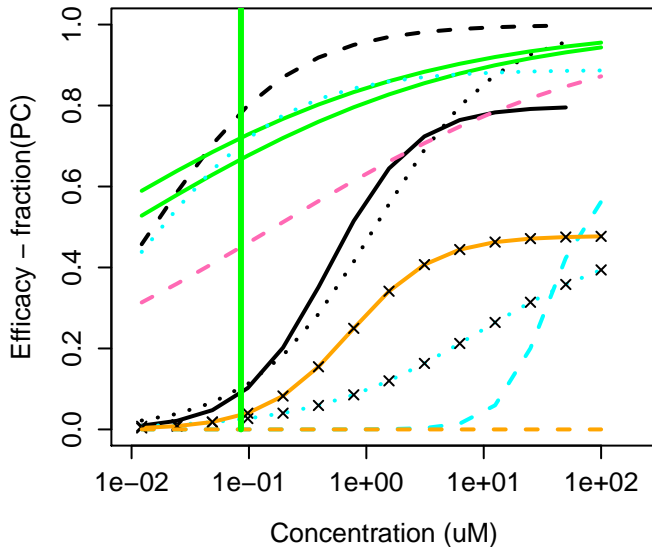

864283-48-7 : GSK232420A  
Agonist: 1.3 Antagonist: 0.019

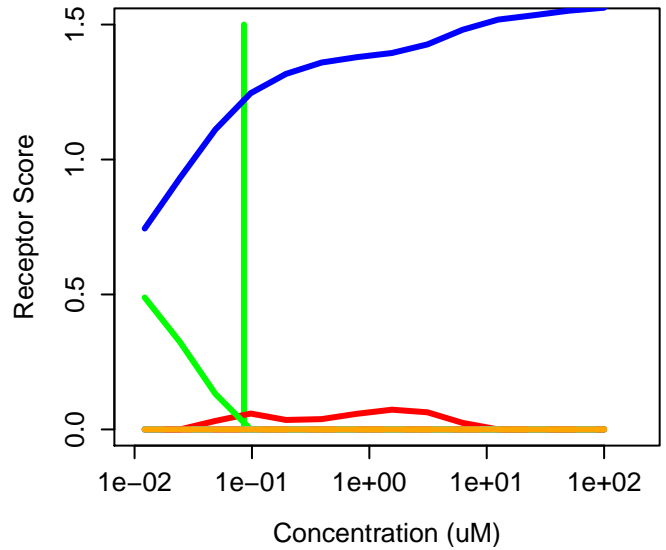

86479-06-3 : Hexaflumuron

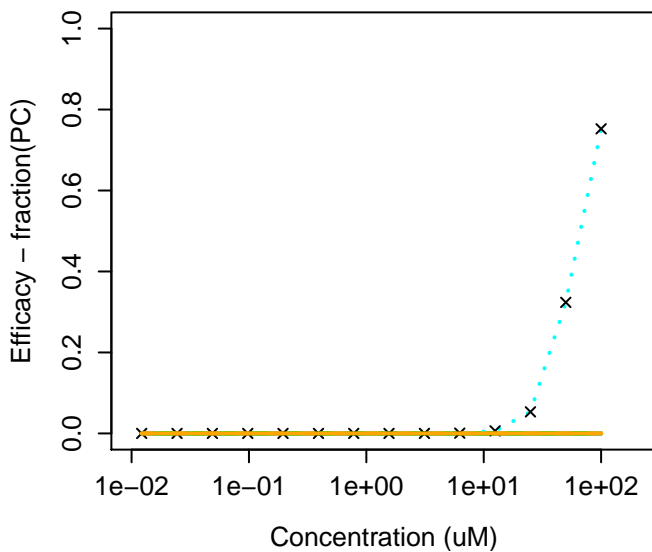

86479-06-3 : Hexaflumuron  
Agonist: 0 Antagonist: 0



**86-50-0 : Azinphos-methyl**

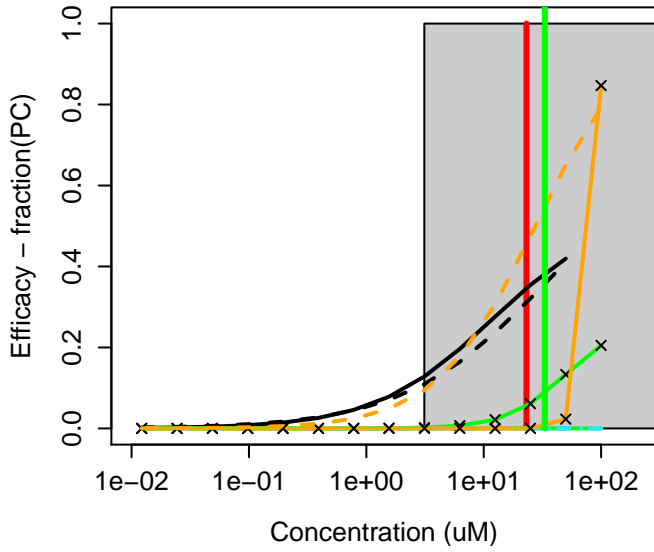

**86-50-0 : Azinphos-methyl  
Agonist: 0 Antagonist: 0.18**

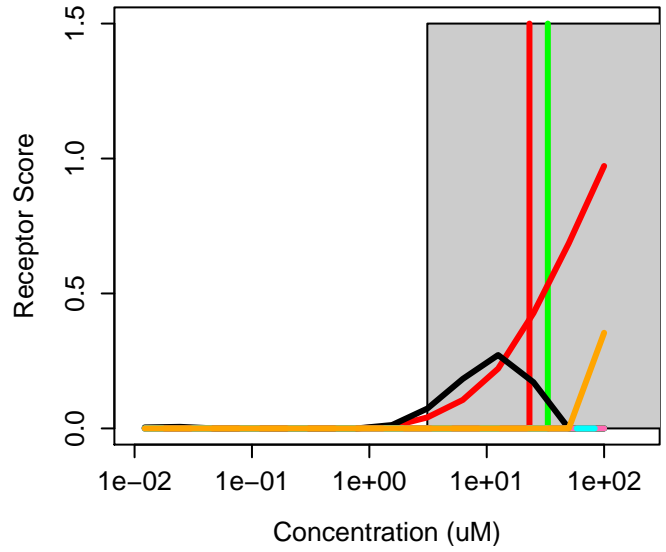

**86-73-7 : Fluorene**



**86-73-7 : Fluorene  
Agonist: 0 Antagonist: 0**



**86-87-3 : 1-Naphthaleneacetic acid**

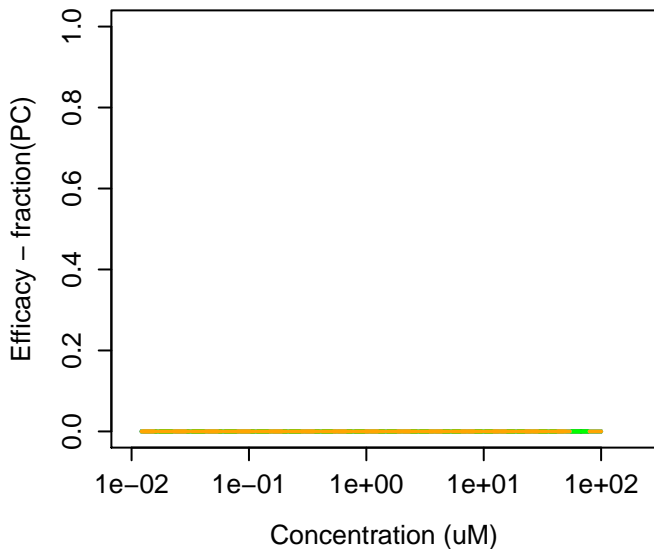

**86-87-3 : 1-Naphthaleneacetic acid  
Agonist: 0 Antagonist: 0**



868-85-9 : Dimethyl hydrogen phosphite



868-85-9 : Dimethyl hydrogen phosphite  
Agonist: 0 Antagonist: 0



87-01-4 : 7-(Dimethylamino)-4-methylcoumarin

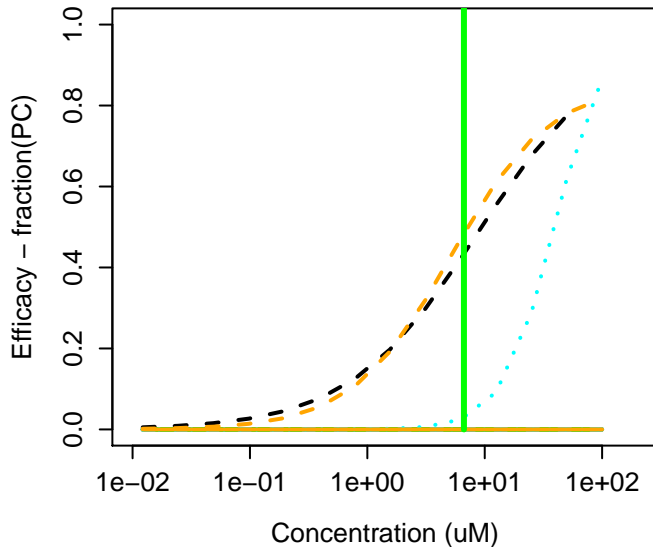

87-01-4 : 7-(Dimethylamino)-4-methylcoumarin  
Agonist: 0.02 Antagonist: 0.091

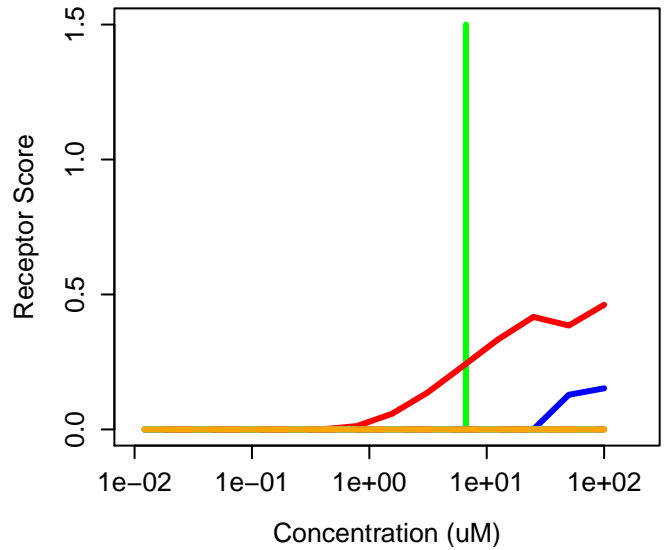

87-18-3 : 4-tert-Butylphenyl salicylate

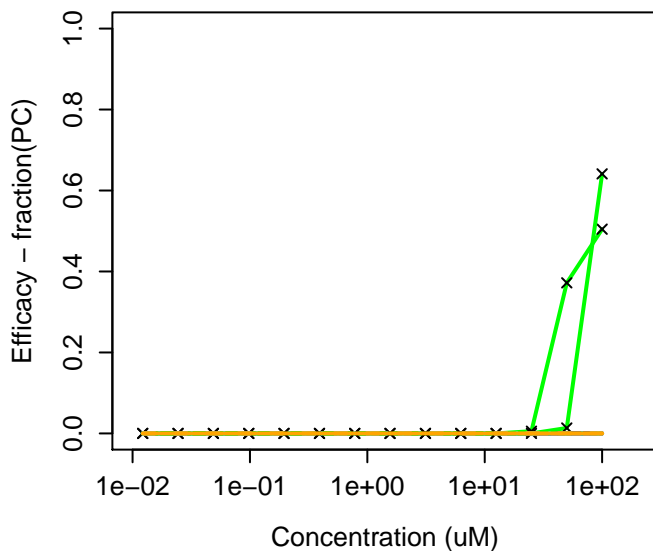

87-18-3 : 4-tert-Butylphenyl salicylate  
Agonist: 0 Antagonist: 0

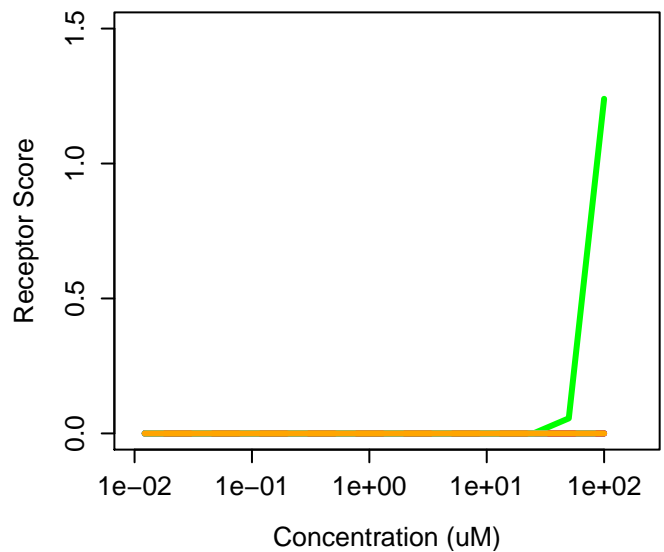

**87-24-1 : Ethyl 2-methylbenzoate**



**87-24-1 : Ethyl 2-methylbenzoate  
Agonist: 0 Antagonist: 0**



**872-50-4 : N-Methyl-2-pyrrolidone**



**872-50-4 : N-Methyl-2-pyrrolidone  
Agonist: 0 Antagonist: 0**



**87-25-2 : Ethyl anthranilate**



**87-25-2 : Ethyl anthranilate  
Agonist: 0 Antagonist: 0**



87392-12-9 : S-Metolachlor

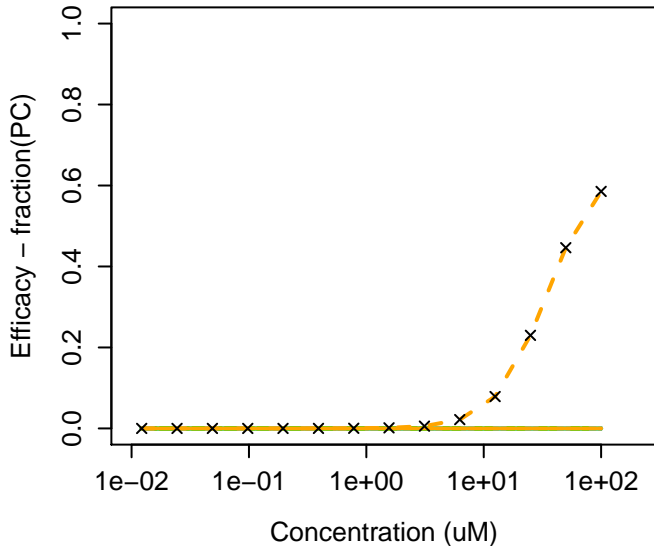

87392-12-9 : S-Metolachlor  
Agonist: 0 Antagonist: 0



87546-18-7 : Flumiclorac-pentyl

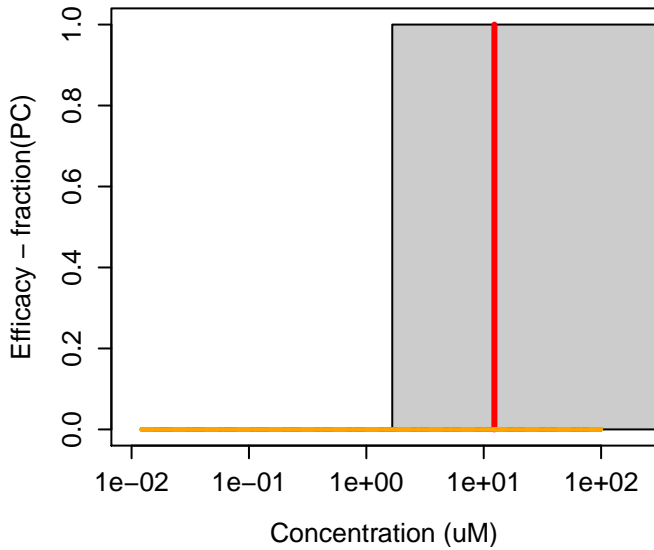

87546-18-7 : Flumiclorac-pentyl  
Agonist: 0 Antagonist: 0

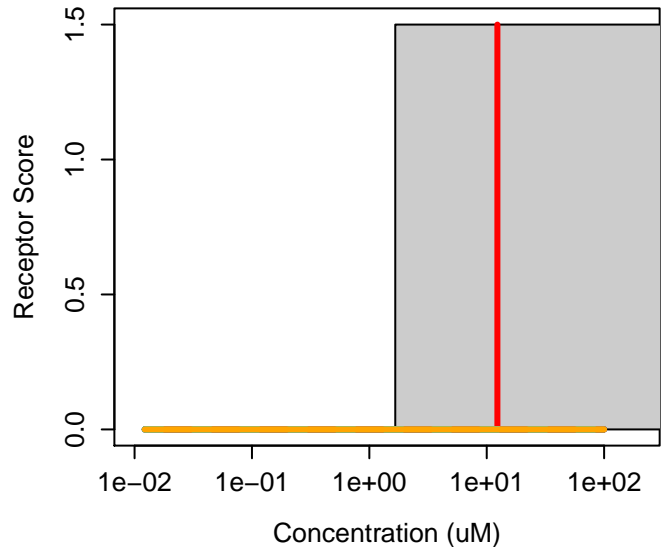

87-61-6 : 1,2,3-Trichlorobenzene

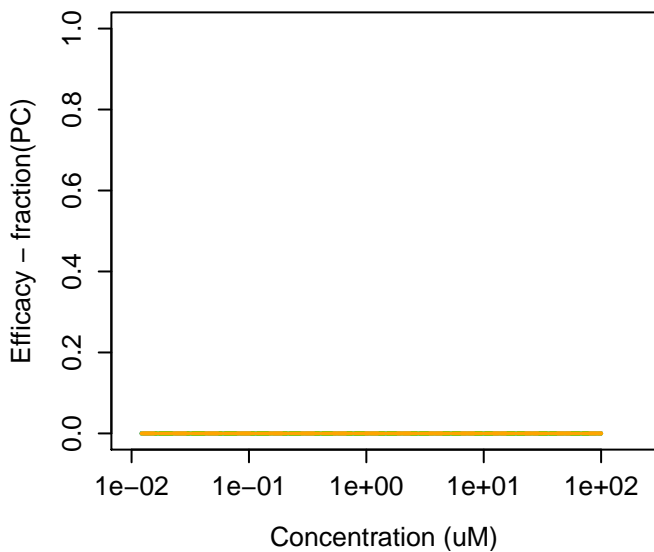

87-61-6 : 1,2,3-Trichlorobenzene  
Agonist: 0 Antagonist: 0



87-62-7 : 2,6-Dimethylaniline

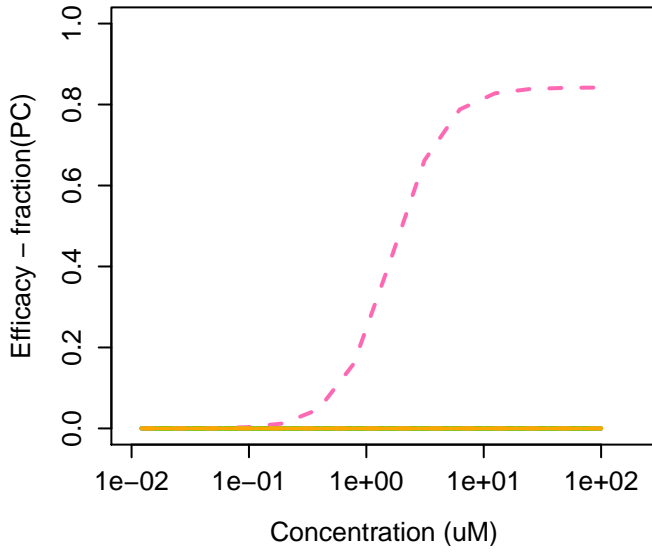

87-62-7 : 2,6-Dimethylaniline  
Agonist: 0.00012 Antagonist: 0

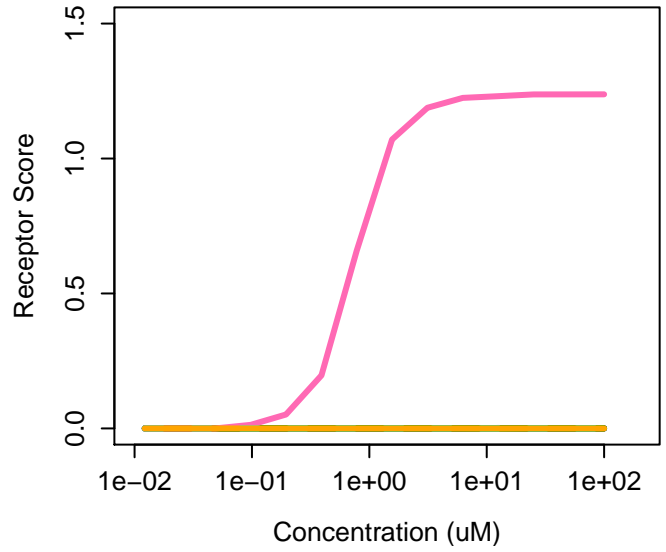

87674-68-8 : Dimethenamid

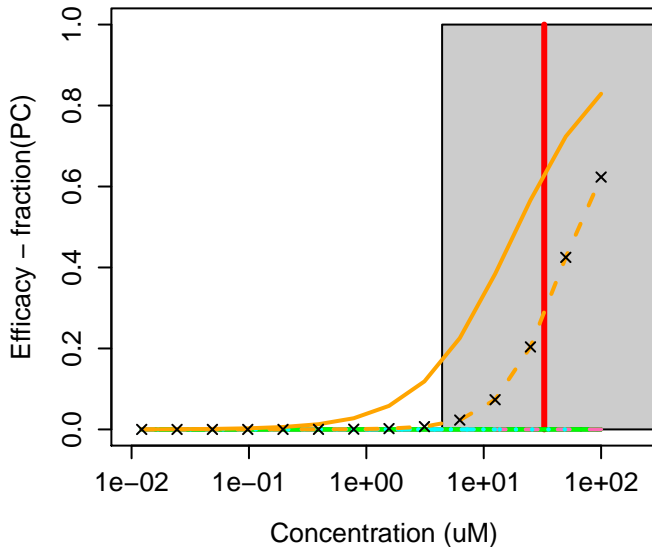

87674-68-8 : Dimethenamid  
Agonist: 0 Antagonist: 0

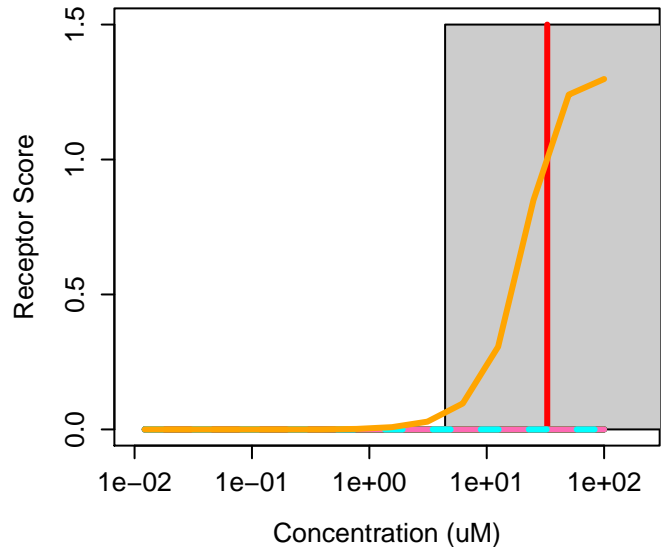

87-68-3 : Hexachloro-1,3-butadiene

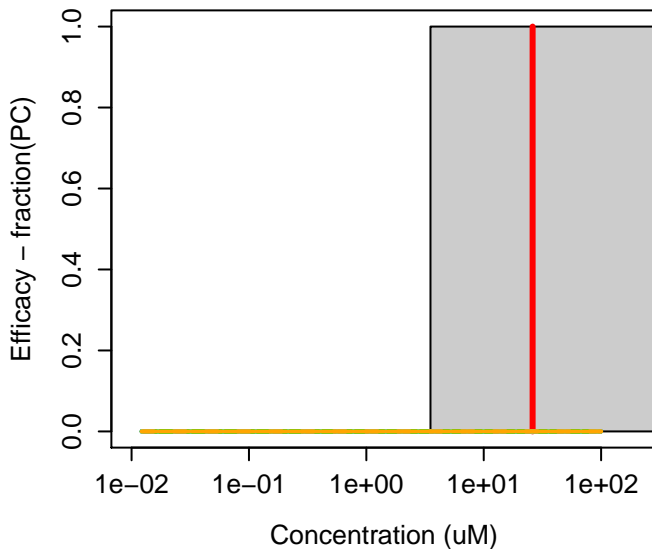

87-68-3 : Hexachloro-1,3-butadiene  
Agonist: 0 Antagonist: 0

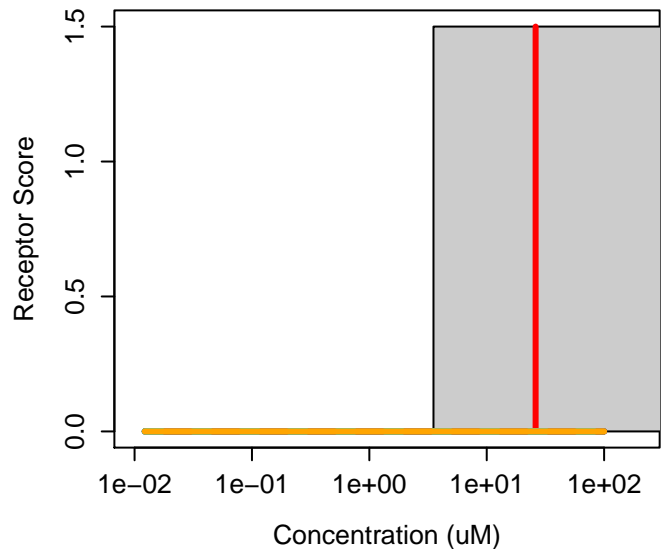

**87-69-4 : L-Tartaric acid**



**87-69-4 : L-Tartaric acid**  
**Agonist: 0 Antagonist: 0**



**877-24-7 : Monopotassium phthalate**



**877-24-7 : Monopotassium phthalate**  
**Agonist: 0 Antagonist: 0**



**87818-31-3 : Cinmethylin**

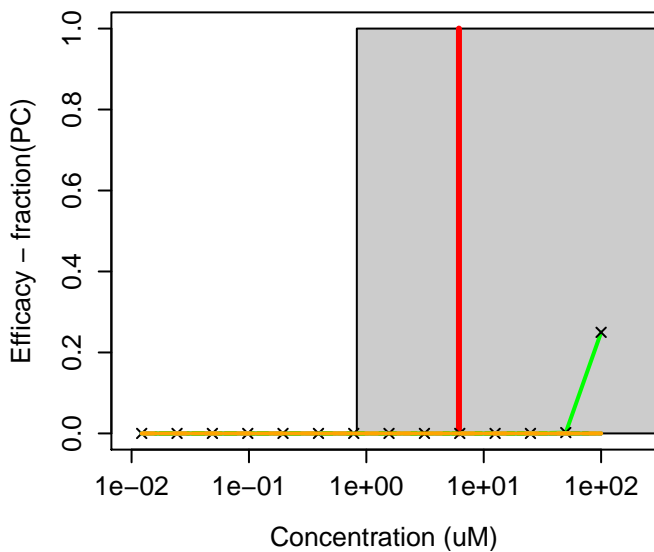

**87818-31-3 : Cinmethylin**  
**Agonist: 0 Antagonist: 0**

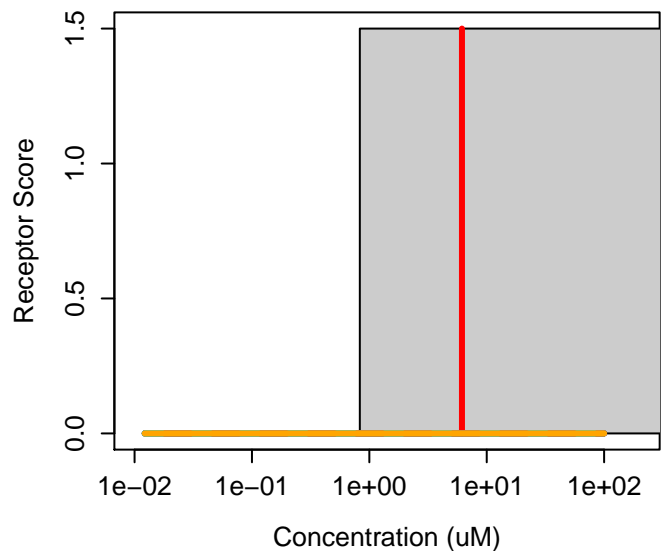

87820-88-0 : Tralkoxydim



87820-88-0 : Tralkoxydim  
Agonist: 0 Antagonist: 0



87-86-5 : Pentachlorophenol

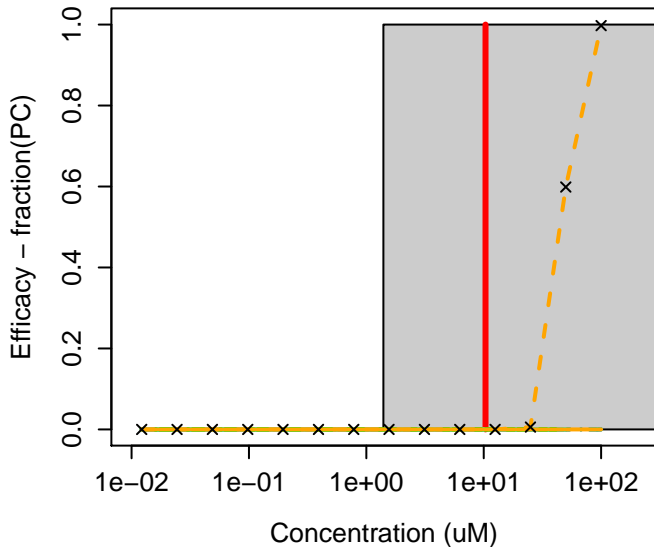

87-86-5 : Pentachlorophenol  
Agonist: 0 Antagonist: 0

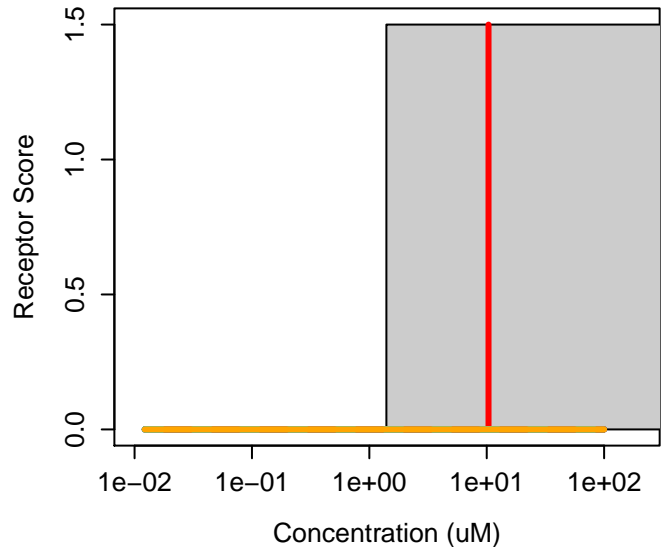

87-90-1 : Symclosene

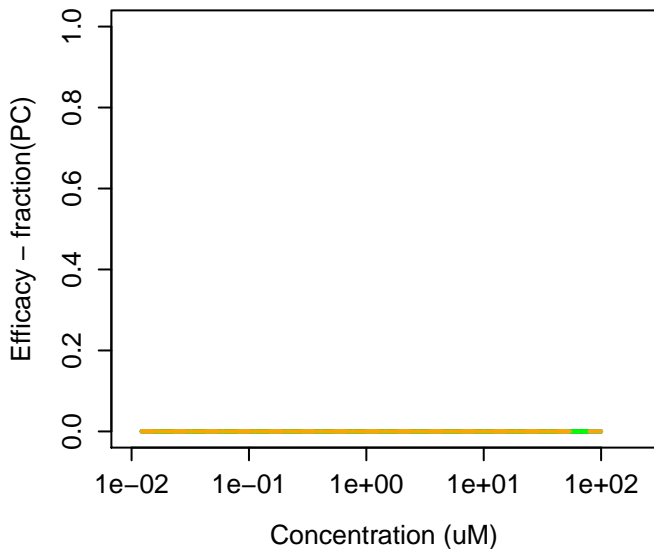

87-90-1 : Symclosene  
Agonist: 0 Antagonist: 0





**88-04-0 : 4-Chloro-3,5-dimethylphenol**

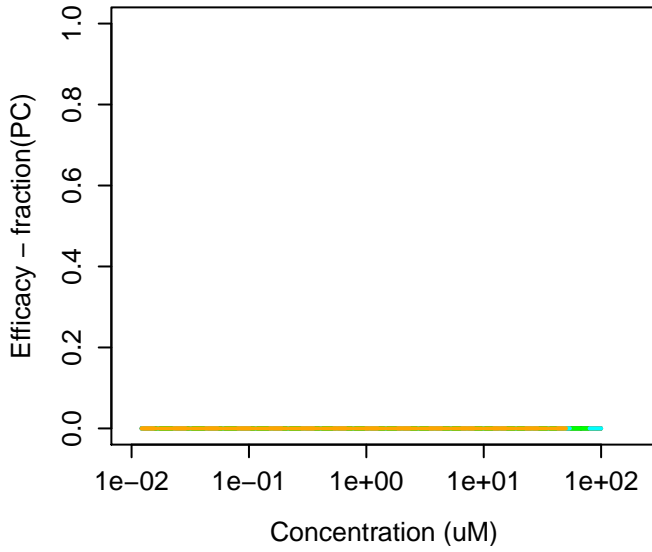

**88-04-0 : 4-Chloro-3,5-dimethylphenol**  
**Agonist: 0 Antagonist: 0**



**88-06-2 : 2,4,6-Trichlorophenol**



**88-06-2 : 2,4,6-Trichlorophenol**  
**Agonist: 0 Antagonist: 0**



**88-12-0 : N-Vinyl-2-pyrrolidone**



**88-12-0 : N-Vinyl-2-pyrrolidone**  
**Agonist: 0 Antagonist: 0**



88-18-6 : 2-tert-Butylphenol



88-18-6 : 2-tert-Butylphenol  
Agonist: 0 Antagonist: 0



88-24-4 : 2,2'-Methylenebis(ethyl-6-tert-butylphenol)

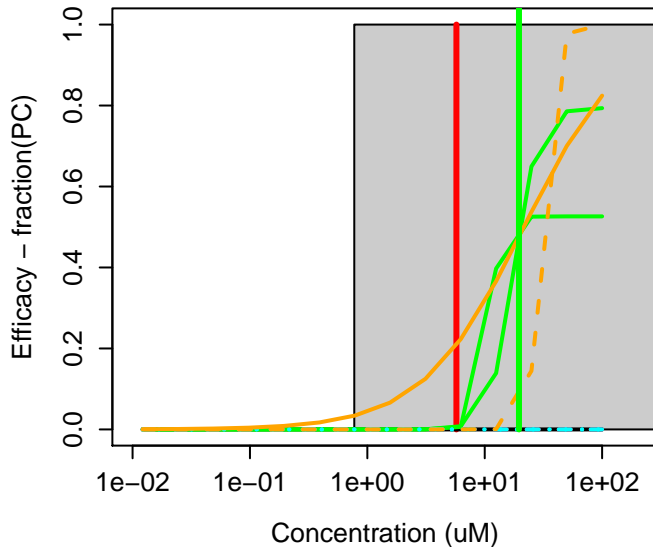

88-24-4 : 2,2'-Methylenebis(ethyl-6-tert-butylphenol)  
Agonist: 0 Antagonist: 0.22

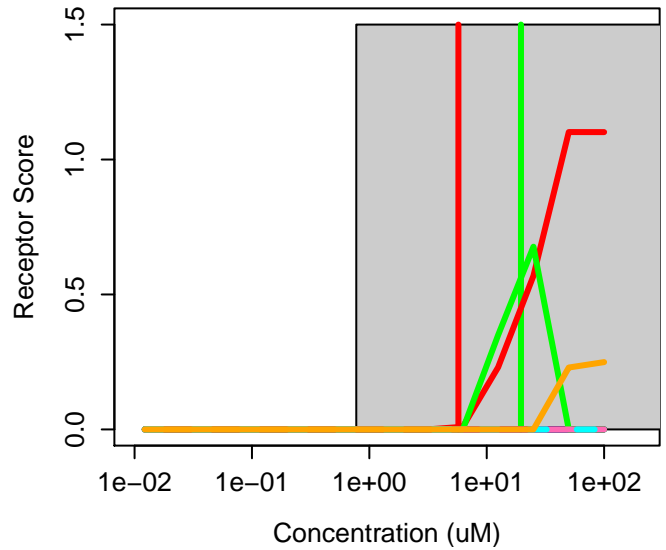

88-30-2 : 3-Trifluoromethyl-4-nitrophenol

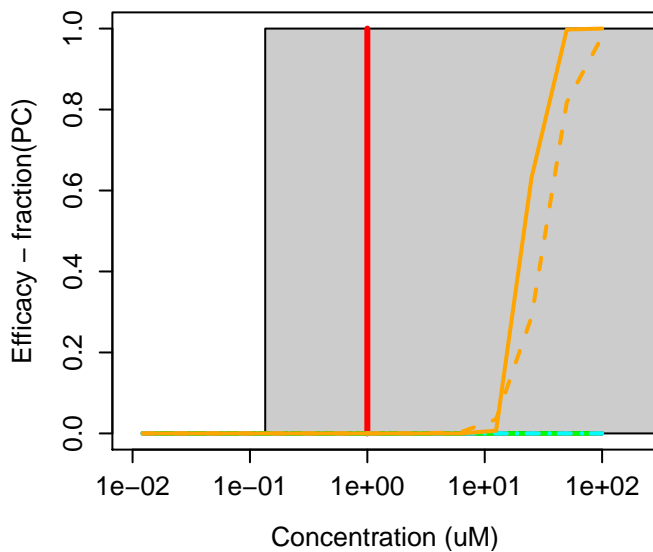

88-30-2 : 3-Trifluoromethyl-4-nitrophenol  
Agonist: 0 Antagonist: 0

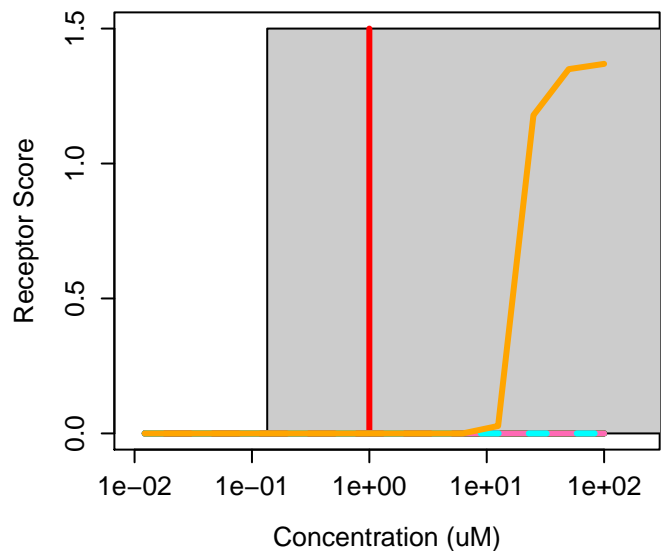

**88-41-5 : 2-tert-Butylcyclohexyl acetate**



**88-41-5 : 2-tert-Butylcyclohexyl acetate**  
Agonist: 0 Antagonist: 0



**88-58-4 : 2,5-Di-tert-butylbenzene-1,4-diol**

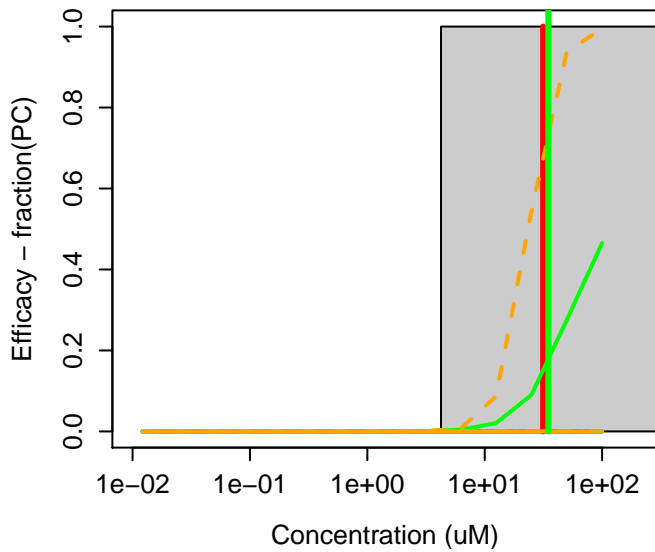

**88-58-4 : 2,5-Di-tert-butylbenzene-1,4-diol**  
Agonist: 0 Antagonist: 0.041

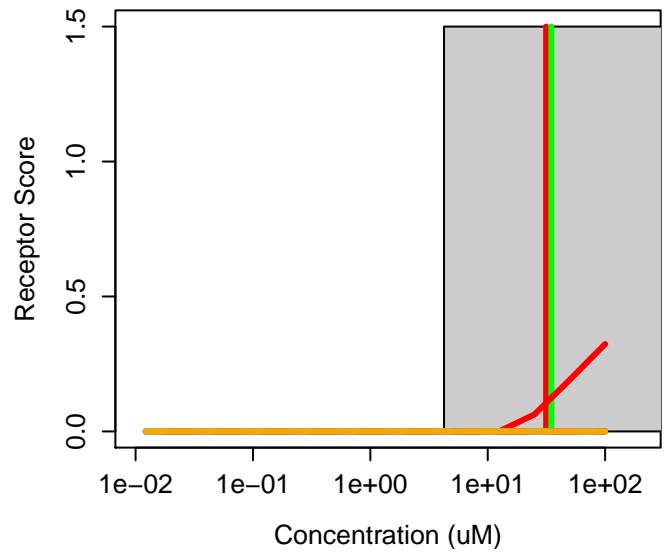

**88-60-8 : 2-tert-Butyl-5-methylphenol**

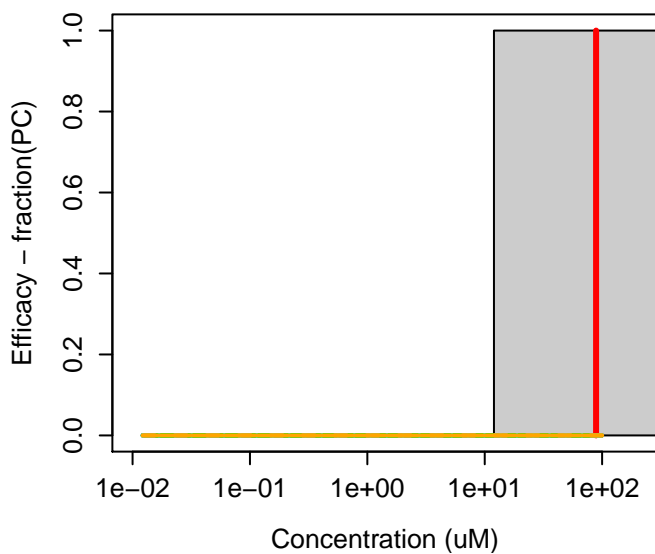

**88-60-8 : 2-tert-Butyl-5-methylphenol**  
Agonist: 0 Antagonist: 0

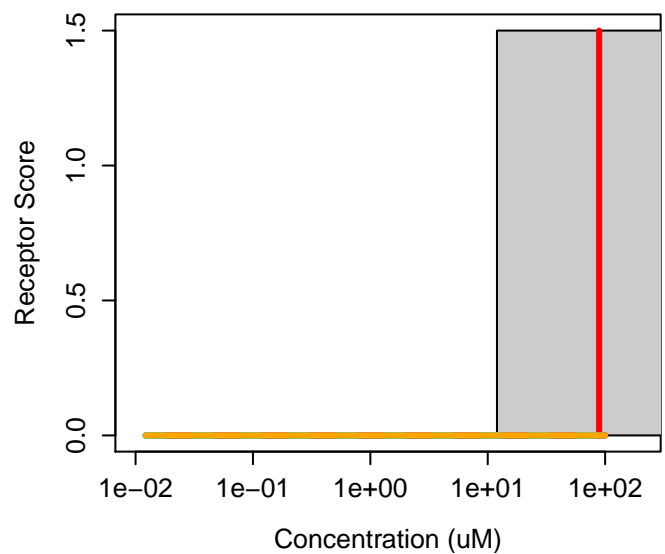

88671-89-0 : Myclobutanil

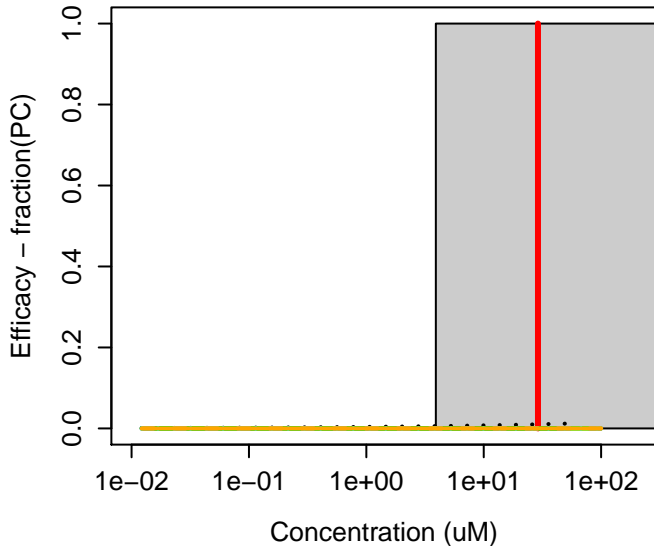

88671-89-0 : Myclobutanil  
Agonist: 0 Antagonist: 0

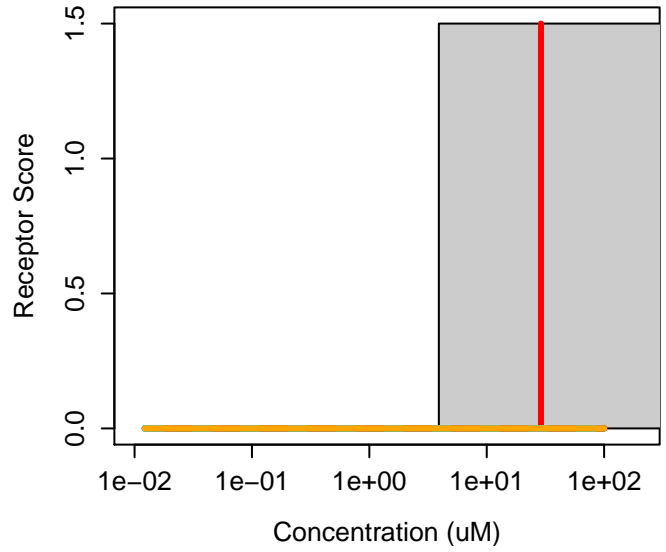

88-69-7 : 2-Isopropylphenol



88-69-7 : 2-Isopropylphenol  
Agonist: 0 Antagonist: 0



88-72-2 : 2-Nitrotoluene

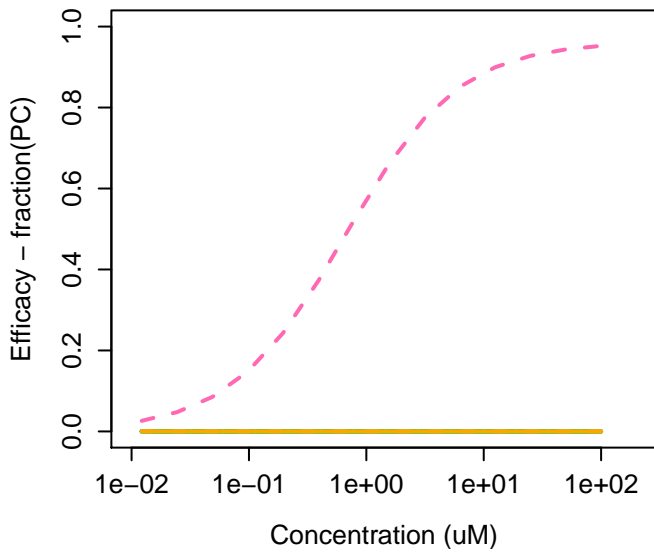

88-72-2 : 2-Nitrotoluene  
Agonist: 3e-04 Antagonist: 0

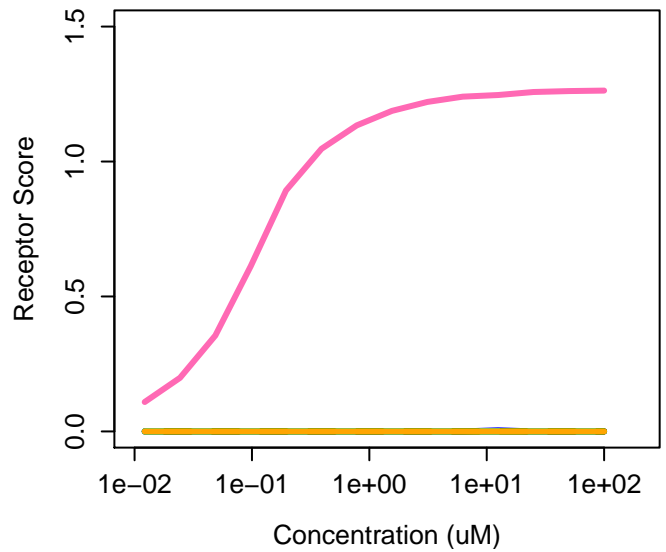

**88-74-4 : 2-Nitroaniline**



**88-74-4 : 2-Nitroaniline**  
Agonist: 0 Antagonist: 0



**88-75-5 : 2-Nitrophenol**



**88-75-5 : 2-Nitrophenol**  
Agonist: 0 Antagonist: 0



**88-85-7 : Dinoseb**

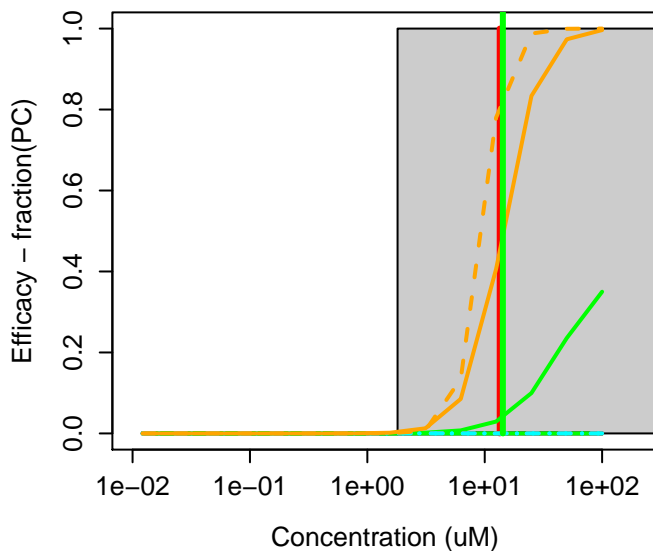

**88-85-7 : Dinoseb**  
Agonist: 0 Antagonist: 0.043

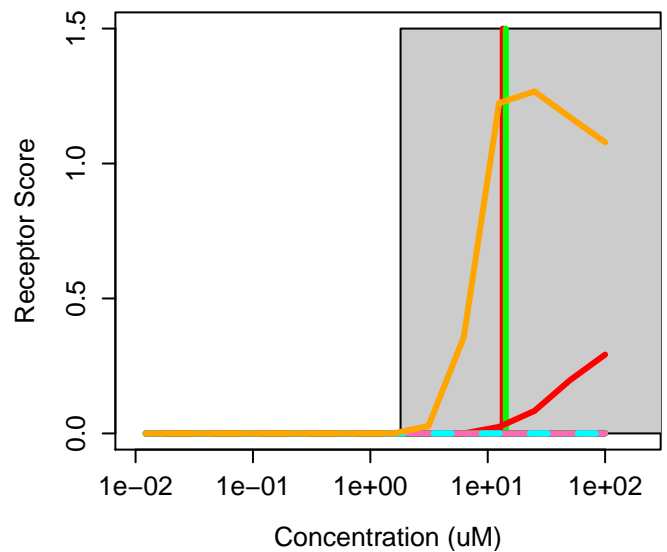

89-04-3 : Trioctyl trimellitate

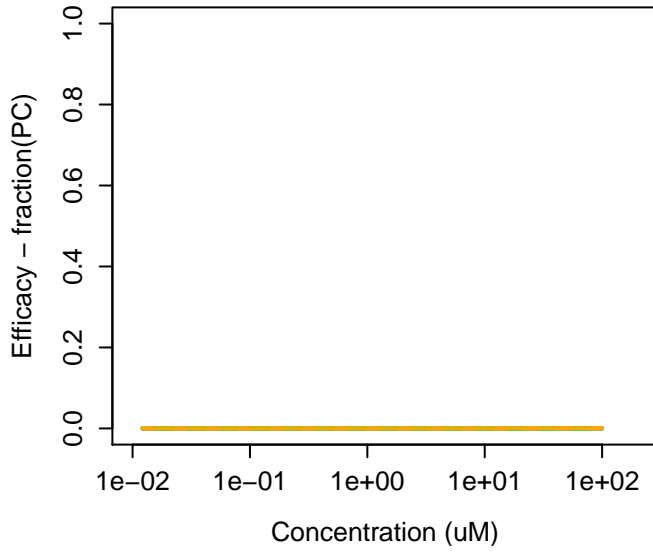

89-04-3 : Trioctyl trimellitate  
Agonist: 0 Antagonist: 0



89-71-4 : Methyl 2-methylbenzoate

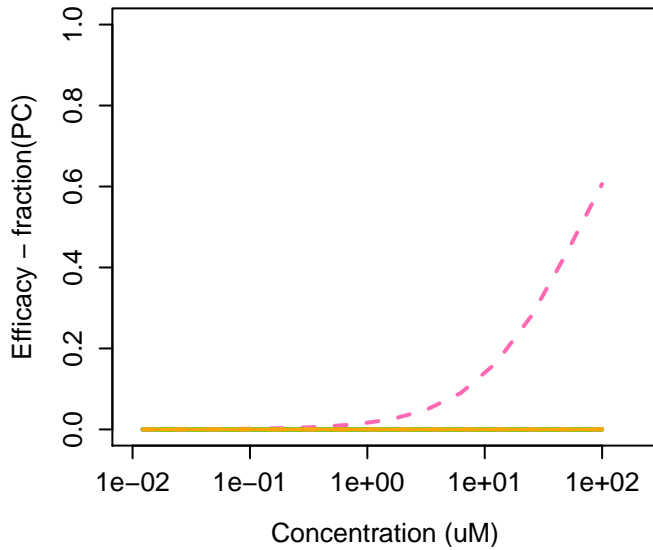

89-71-4 : Methyl 2-methylbenzoate  
Agonist: 0 Antagonist: 0

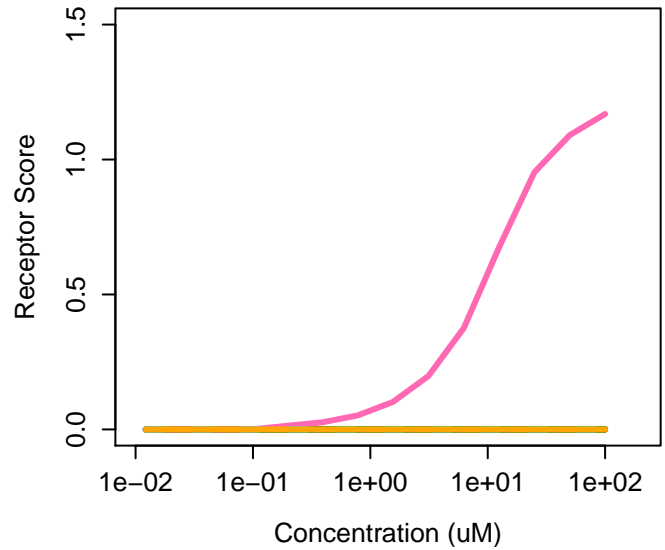

89-72-5 : 2-(Butan-2-yl)phenol

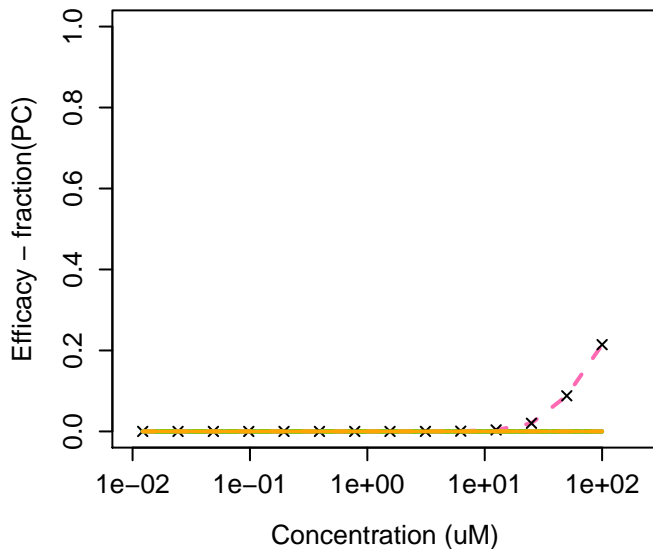

89-72-5 : 2-(Butan-2-yl)phenol  
Agonist: 0 Antagonist: 0

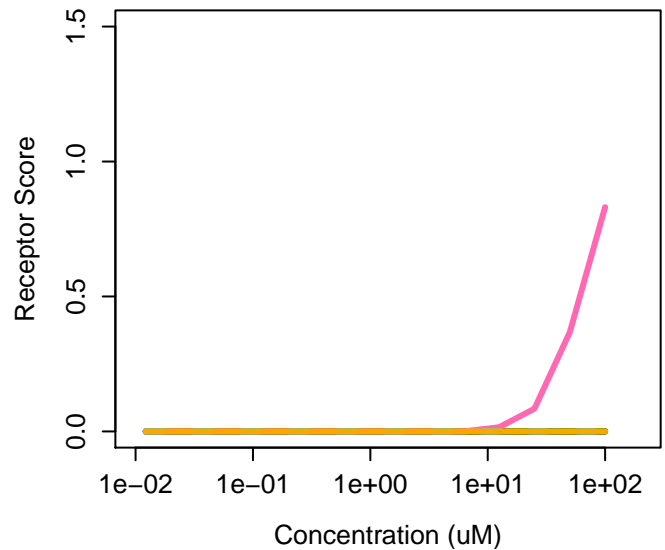

**89-78-1 : dl-Menthol**



**89-78-1 : dl-Menthol**  
**Agonist: 0 Antagonist: 0**



**89-83-8 : Thymol**



**89-83-8 : Thymol**  
**Agonist: 0 Antagonist: 0**



**89-87-2 : 1,3-Dimethyl-4-nitrobenzene**

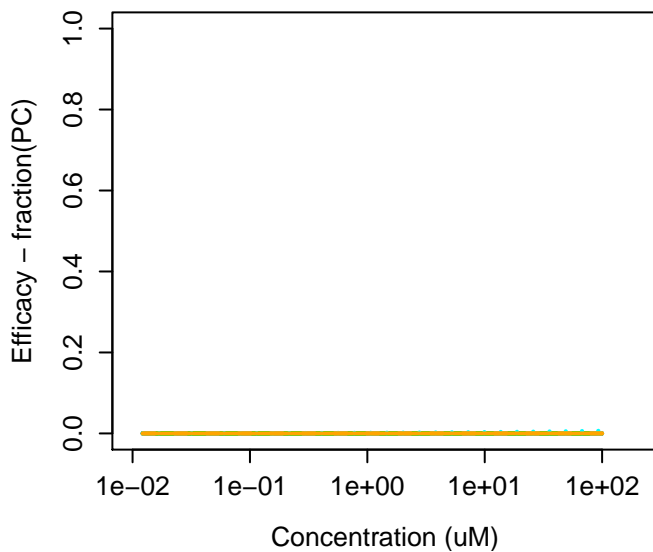

**89-87-2 : 1,3-Dimethyl-4-nitrobenzene**  
**Agonist: 0 Antagonist: 0**

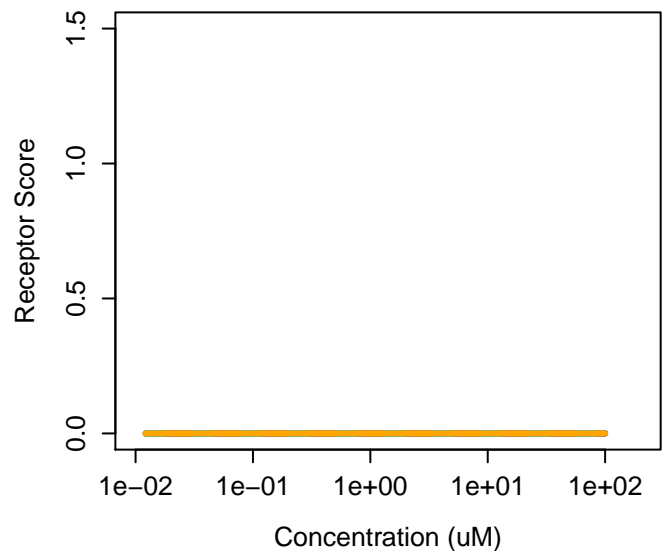

**90-00-6 : 2-Ethylphenol**



**90-00-6 : 2-Ethylphenol  
Agonist: 0 Antagonist: 0**



**90-02-8 : Salicylaldehyde**



**90-02-8 : Salicylaldehyde  
Agonist: 0 Antagonist: 0**



**9003-11-6 : Pluronic F-127**

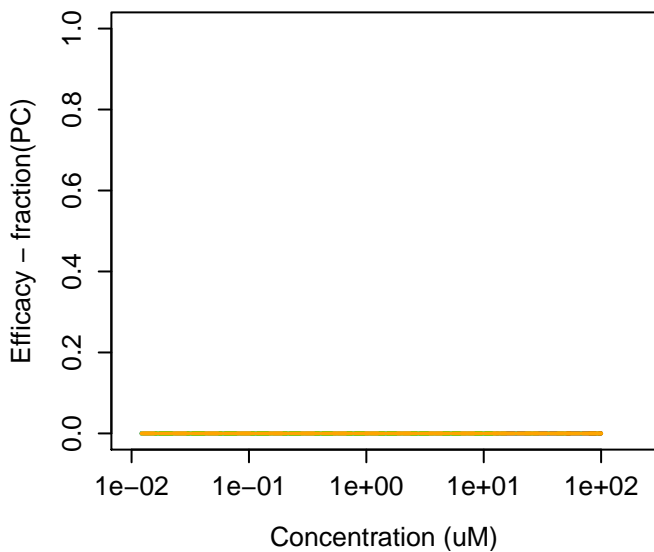

**9003-11-6 : Pluronic F-127  
Agonist: 0 Antagonist: 0**





90-04-0 : 2-Anisidine



90-04-0 : 2-Anisidine  
Agonist: 0 Antagonist: 0



9004-82-4 : Sodium lauryl polyoxyethylene ether su 9004-82-4 : Sodium lauryl polyoxyethylene ether su  
Agonist: 0 Antagonist: 4.4e-05

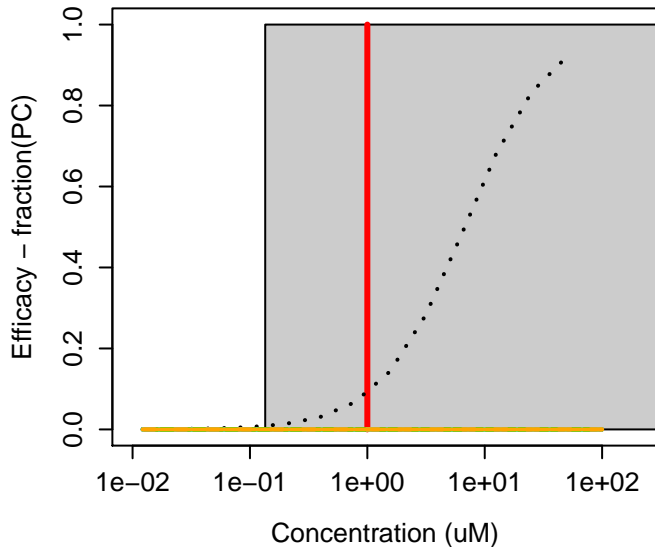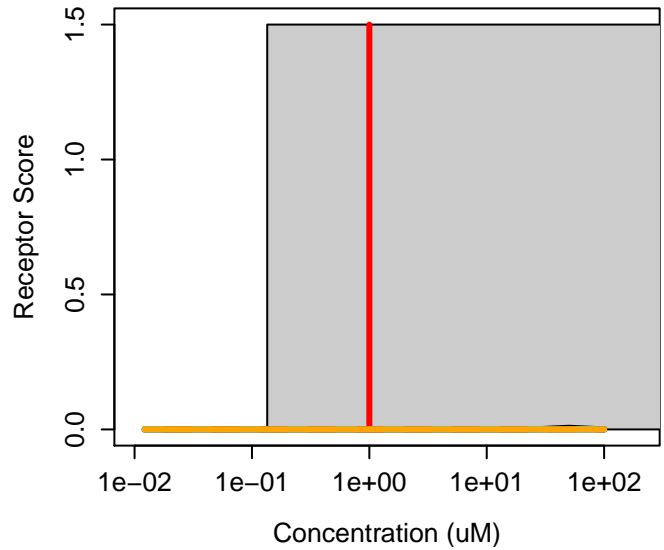

9004-96-0 : Polyoxyethylene monoleate

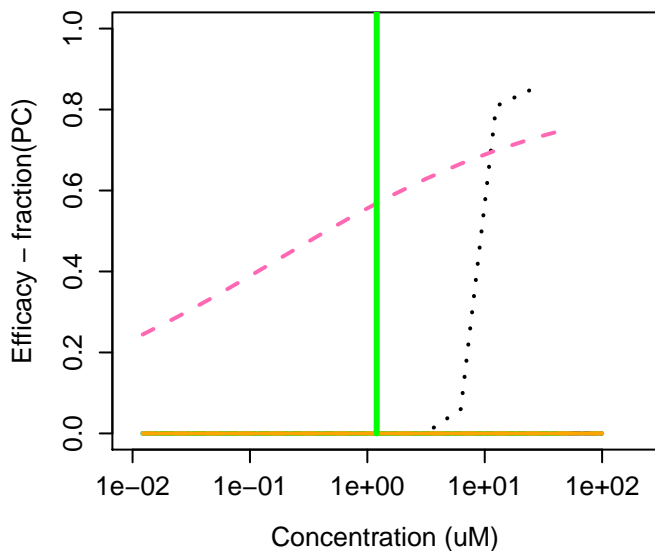

9004-96-0 : Polyoxyethylene monoleate  
Agonist: 0.1 Antagonist: 0

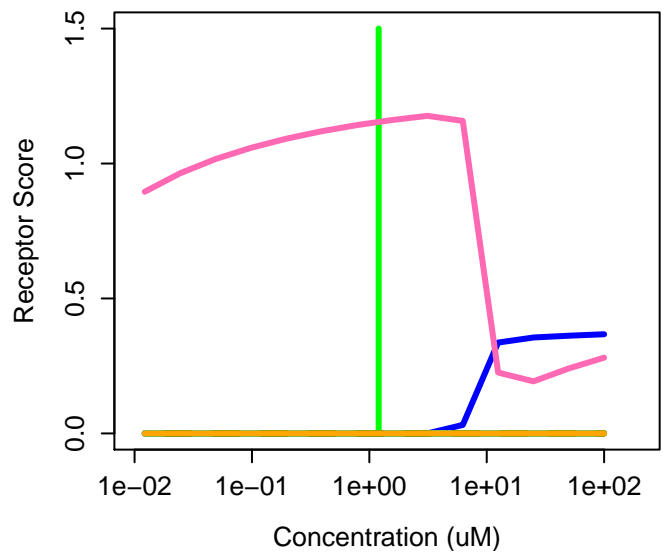

90-05-1 : 2-Methoxyphenol



90-05-1 : 2-Methoxyphenol  
Agonist: 0 Antagonist: 0



9005-65-6 : Polysorbate 80

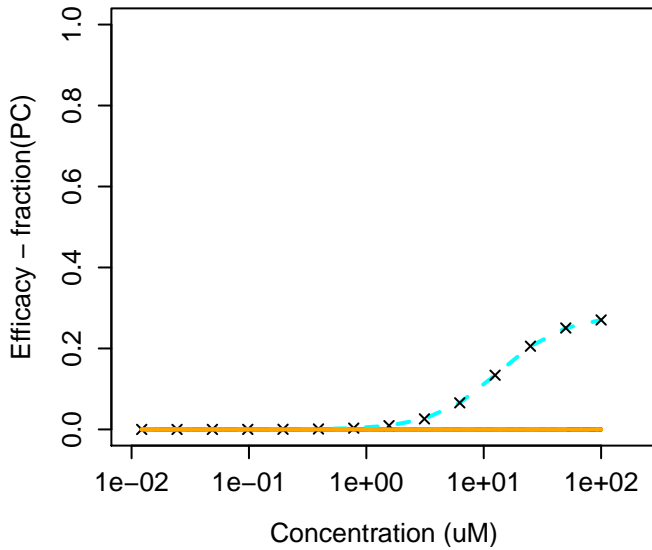

9005-65-6 : Polysorbate 80  
Agonist: 0 Antagonist: 0



90-12-0 : 1-Methylnaphthalene



90-12-0 : 1-Methylnaphthalene  
Agonist: 0 Antagonist: 0



**90-15-3 : 1-Naphthol**

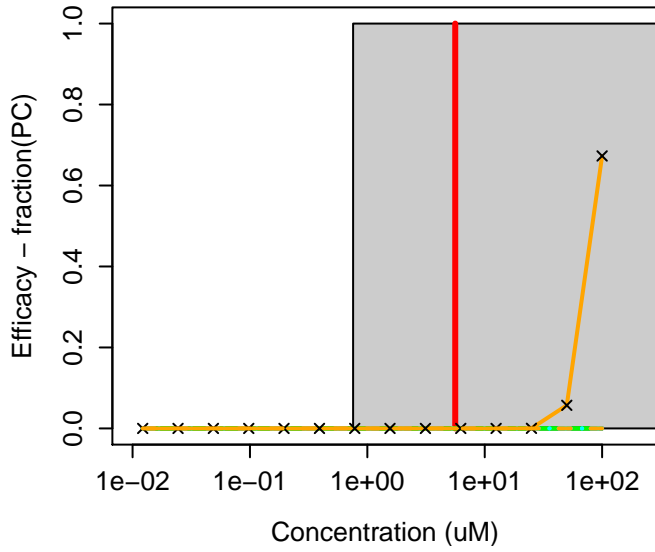

**90-15-3 : 1-Naphthol  
Agonist: 0 Antagonist: 0**

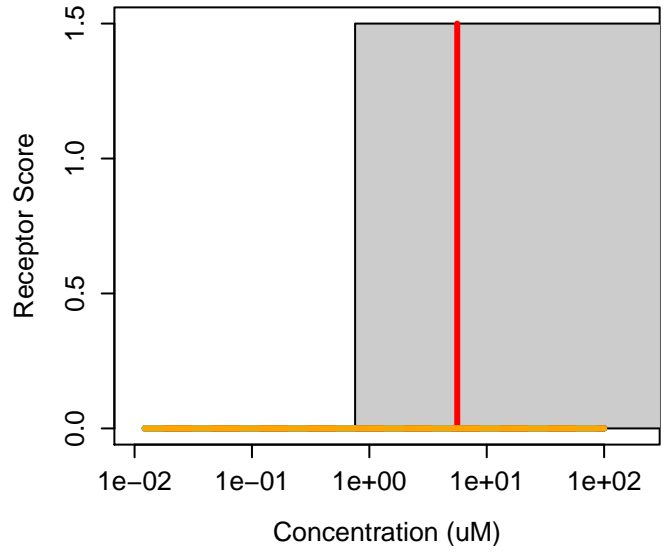

**9016-00-6 : Polydimethylsiloxane**

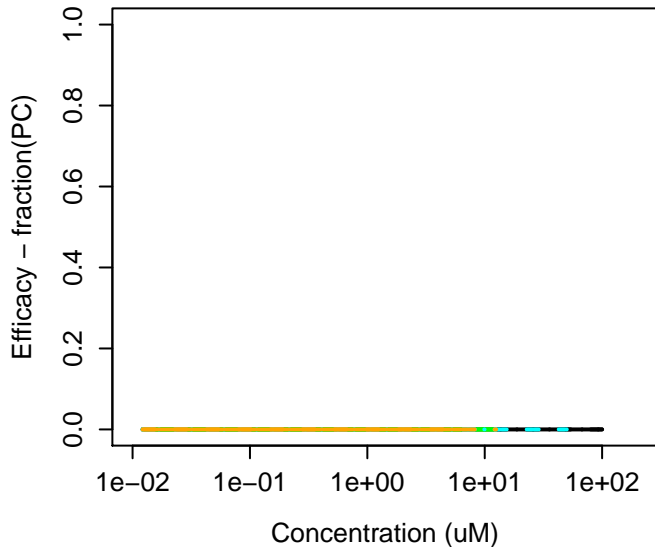

**9016-00-6 : Polydimethylsiloxane  
Agonist: 0 Antagonist: 0**



**9016-87-9 : Polymethylene polyphenyl isocyanate**

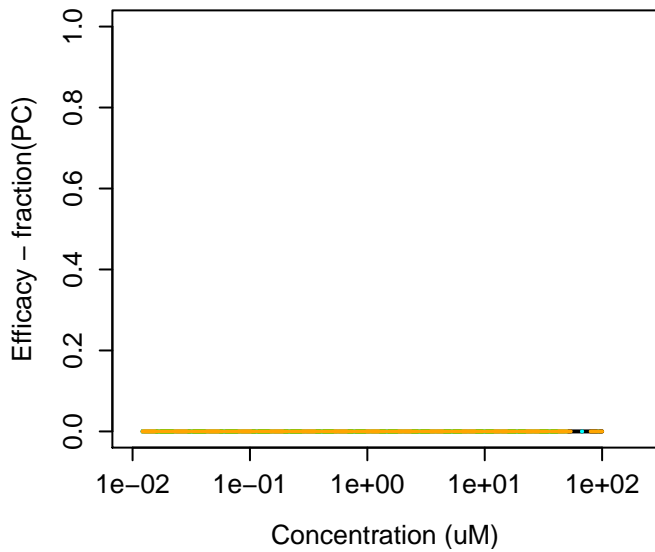

**9016-87-9 : Polymethylene polyphenyl isocyanate  
Agonist: 0 Antagonist: 0**



90-30-2 : N-Phenyl-1-naphthylamine

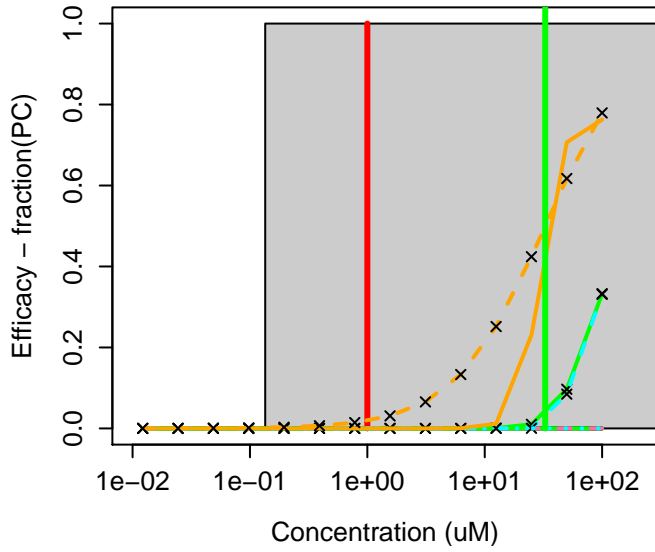

90-30-2 : N-Phenyl-1-naphthylamine  
Agonist: 0 Antagonist: 0.026

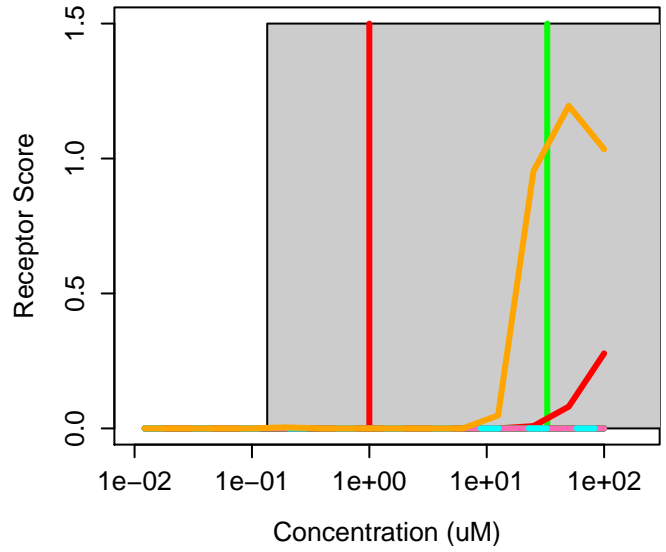

90357-06-5 : Bicalutamide

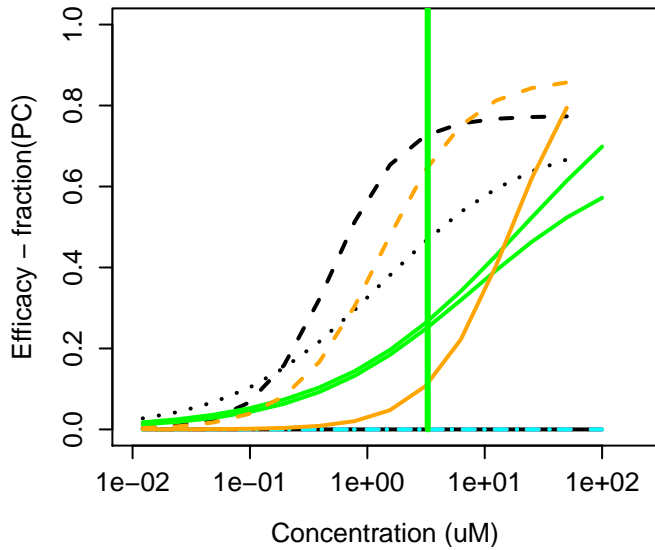

90357-06-5 : Bicalutamide  
Agonist: 0.0016 Antagonist: 0.73

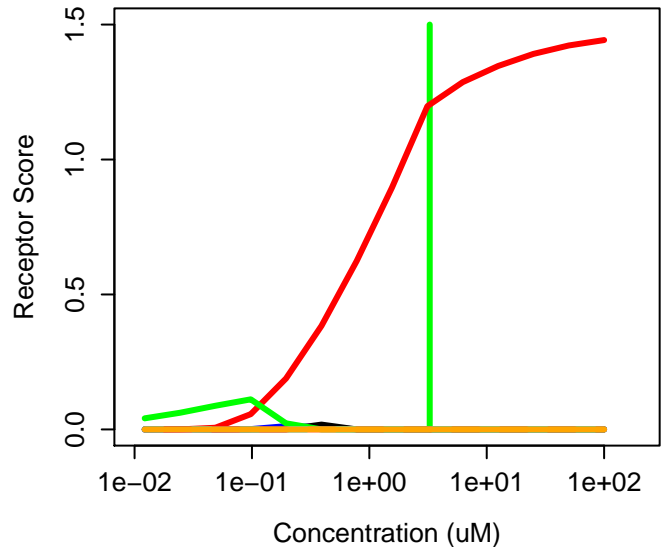

90-43-7 : 2-Phenylphenol

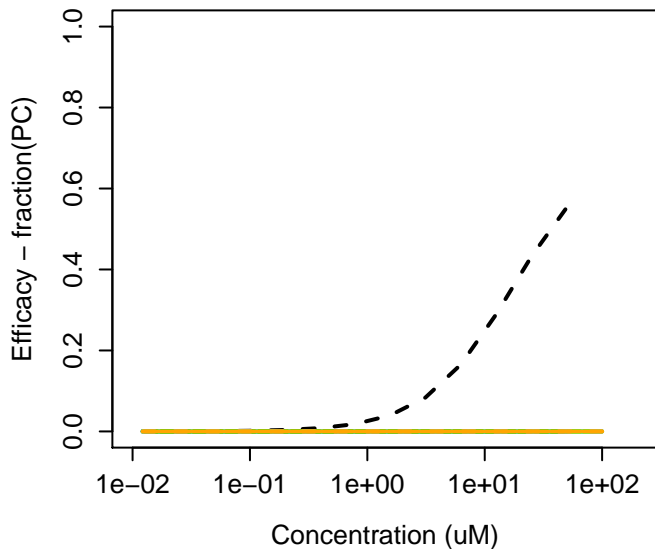

90-43-7 : 2-Phenylphenol  
Agonist: 0 Antagonist: 0

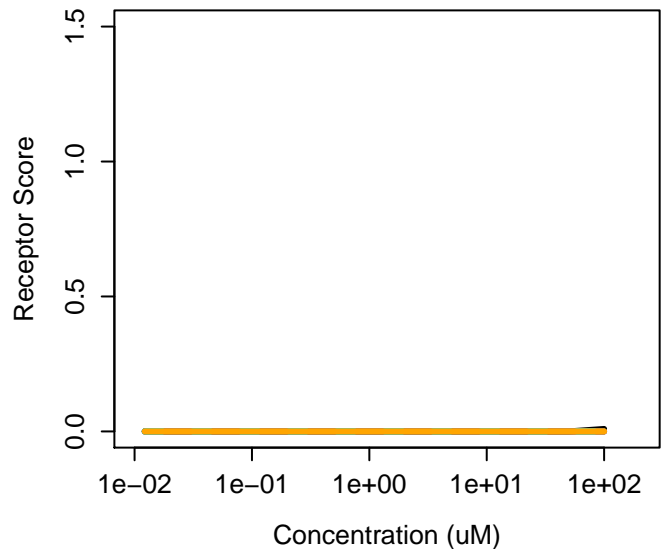

90-72-2 : 2,4,6-Tris(dimethylaminomethyl)phenc



90-72-2 : 2,4,6-Tris(dimethylaminomethyl)phenc  
Agonist: 0 Antagonist: 0



90823-38-4 : Denatonium saccharide



90823-38-4 : Denatonium saccharide  
Agonist: 0 Antagonist: 0



90-94-8 : Michler's ketone

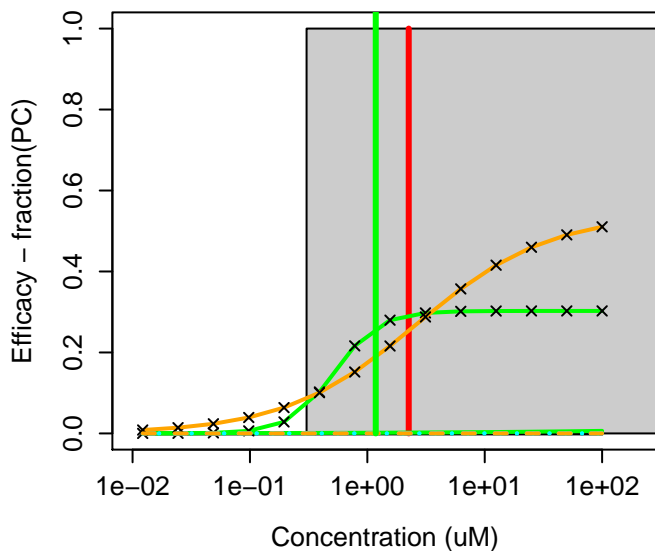

90-94-8 : Michler's ketone  
Agonist: 0 Antagonist: 0.087

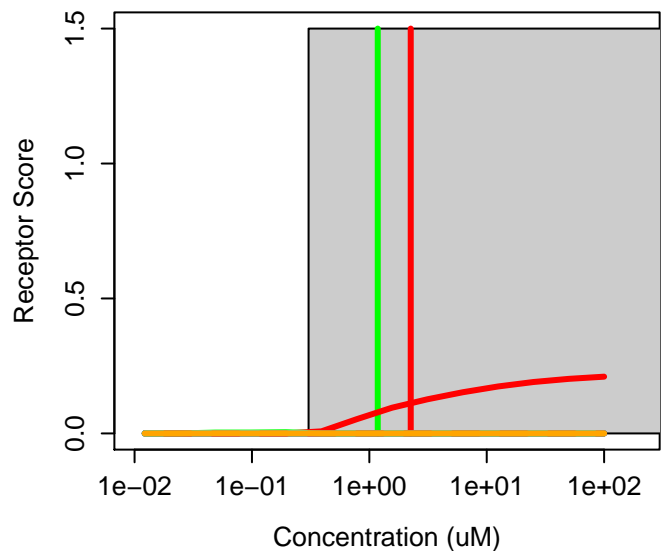

91082-17-6 : C10-21 sulfonic acids phenyl ester

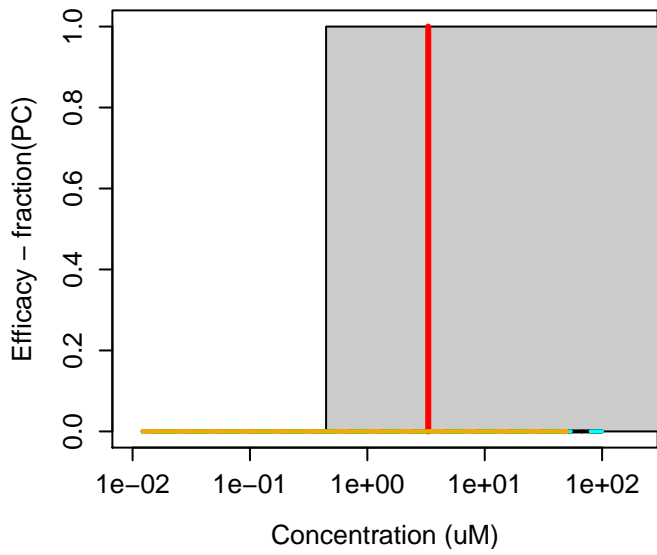

91082-17-6 : C10-21 sulfonic acids phenyl ester  
Agonist: 0 Antagonist: 0

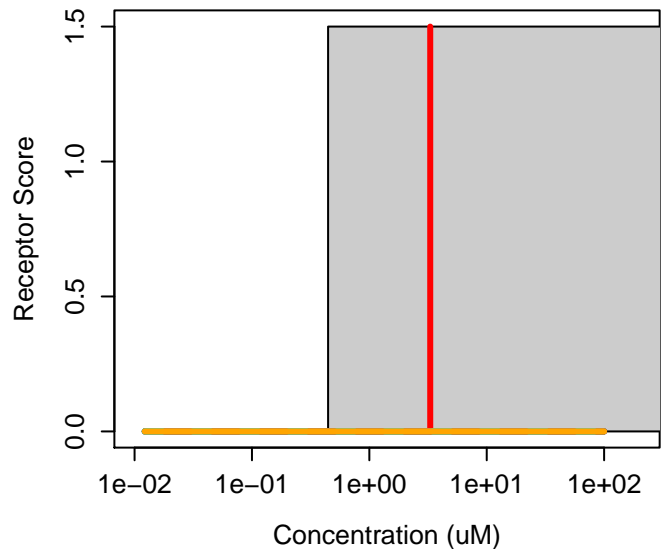

91-20-3 : Naphthalene

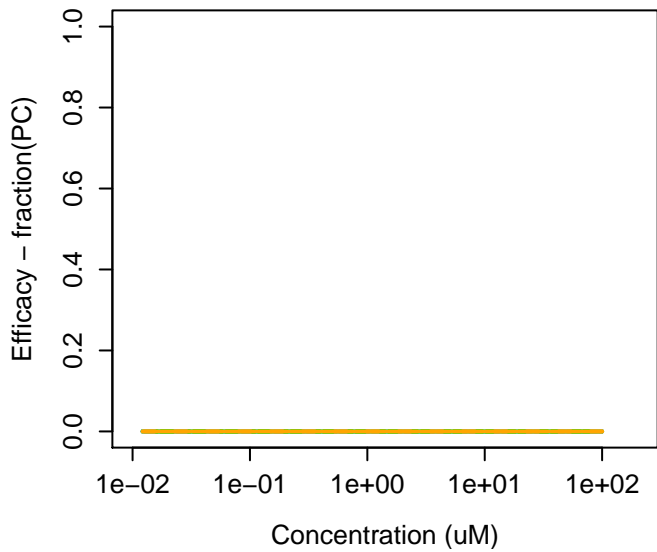

91-20-3 : Naphthalene  
Agonist: 0 Antagonist: 0



91-22-5 : Quinoline

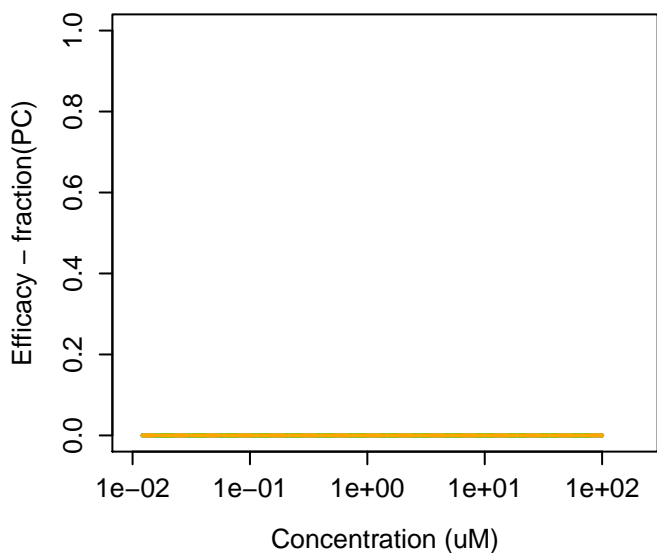

91-22-5 : Quinoline  
Agonist: 0 Antagonist: 0



91465-08-6 : lambda-Cyhalothrin

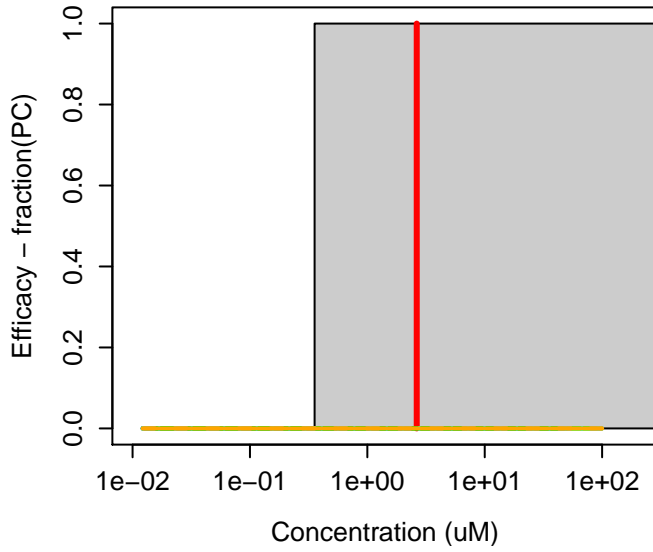

91465-08-6 : lambda-Cyhalothrin  
Agonist: 0 Antagonist: 0

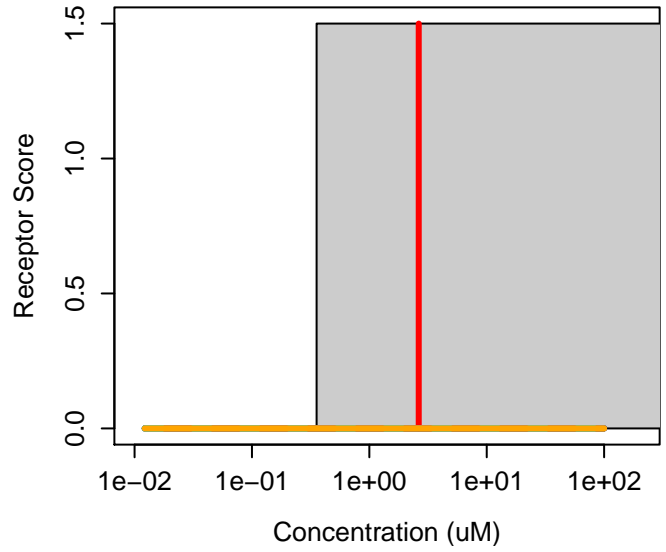

91-53-2 : Ethoxyquin

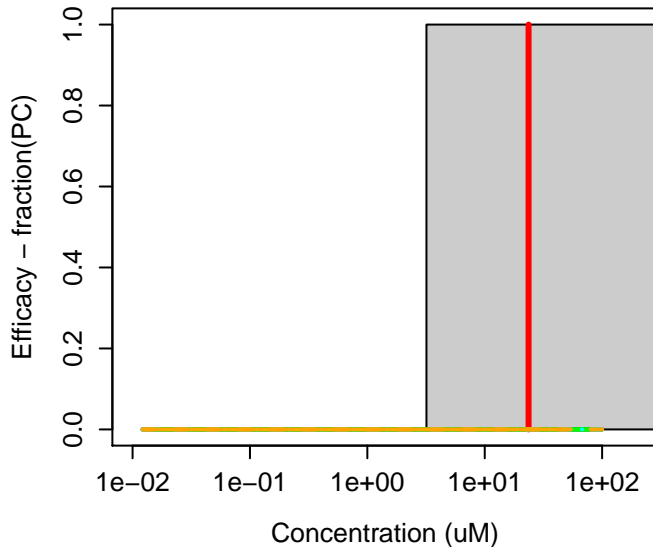

91-53-2 : Ethoxyquin  
Agonist: 0 Antagonist: 0

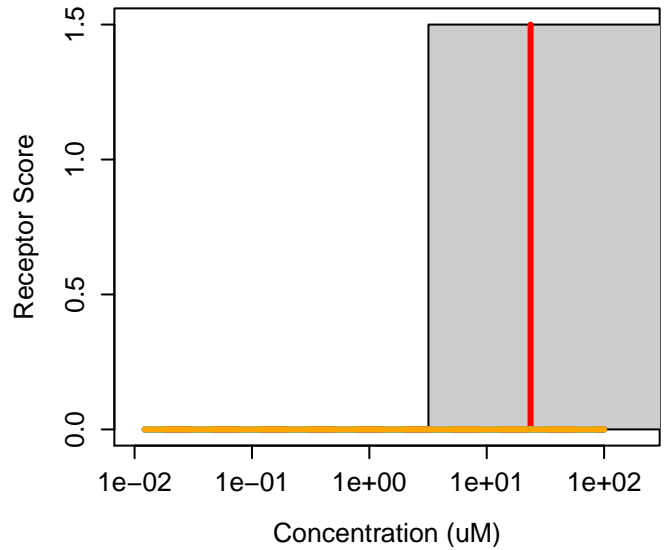

91-59-8 : 2-Naphthylamine



91-59-8 : 2-Naphthylamine  
Agonist: 0 Antagonist: 0



**91-62-3 : 6-Methylquinoline**



**91-62-3 : 6-Methylquinoline  
Agonist: 0 Antagonist: 0**



**91-64-5 : Coumarin**

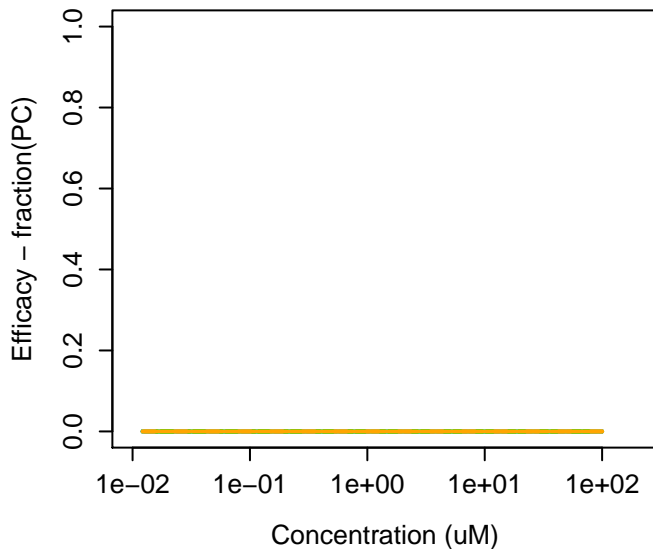

**91-64-5 : Coumarin  
Agonist: 0 Antagonist: 0**



**91-66-7 : N,N-Diethylaniline**



**91-66-7 : N,N-Diethylaniline  
Agonist: 0 Antagonist: 0**





919-30-2 : 3-Aminopropyltriethoxysilane



919-30-2 : 3-Aminopropyltriethoxysilane  
Agonist: 0 Antagonist: 0



92-04-6 : 2-Chloro-4-phenylphenol

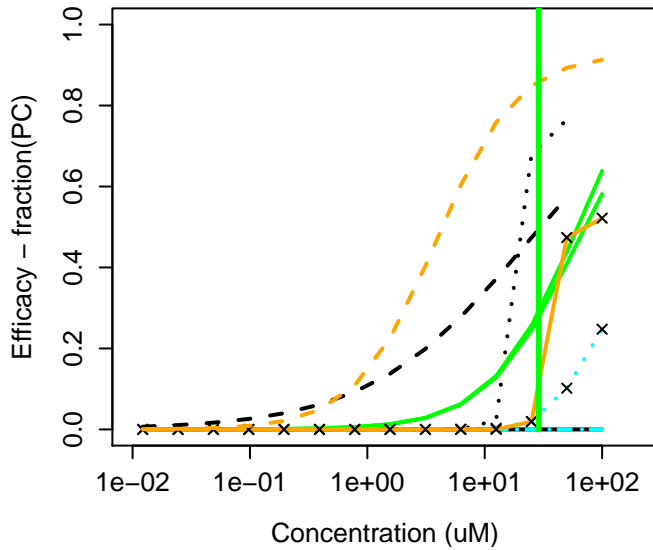

92-04-6 : 2-Chloro-4-phenylphenol  
Agonist: 0 Antagonist: 0.35

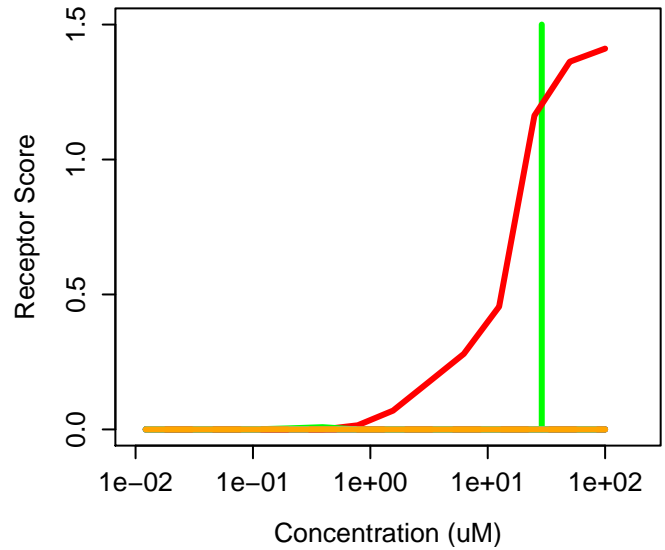

924-16-3 : N-Nitrosodibutylamine



924-16-3 : N-Nitrosodibutylamine  
Agonist: 0 Antagonist: 0



**92-52-4 : Biphenyl**



**92-52-4 : Biphenyl**  
Agonist: 0 Antagonist: 0



**92-68-2 : 4-Cyclohexylcyclohexanone**

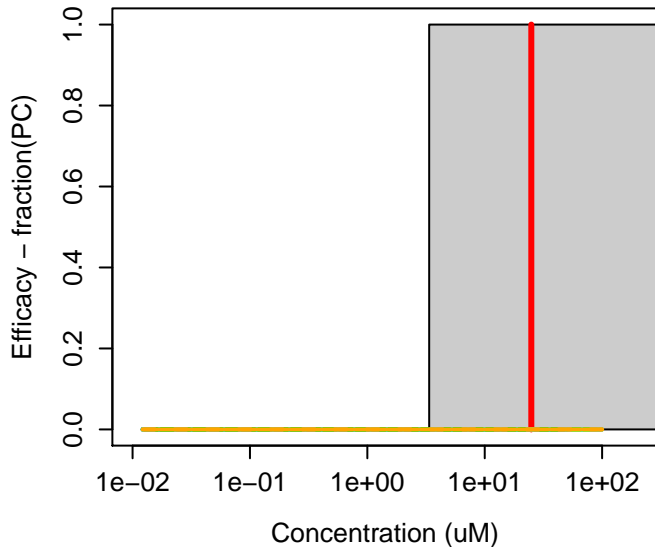

**92-68-2 : 4-Cyclohexylcyclohexanone**  
Agonist: 0 Antagonist: 0

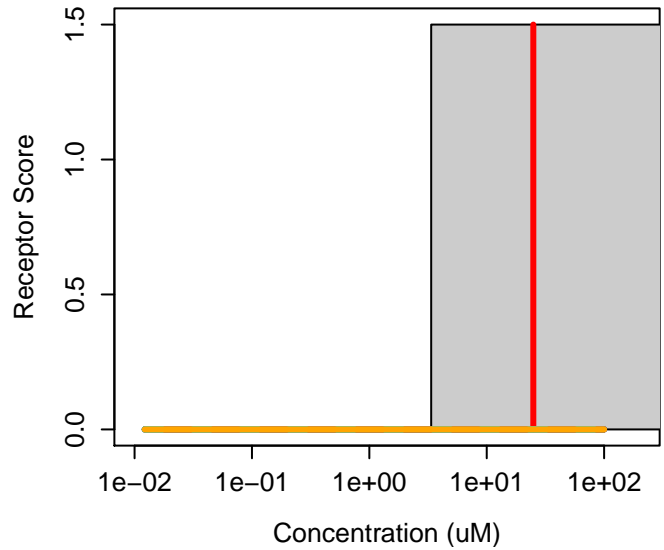

**92-69-3 : 4-Phenylphenol**

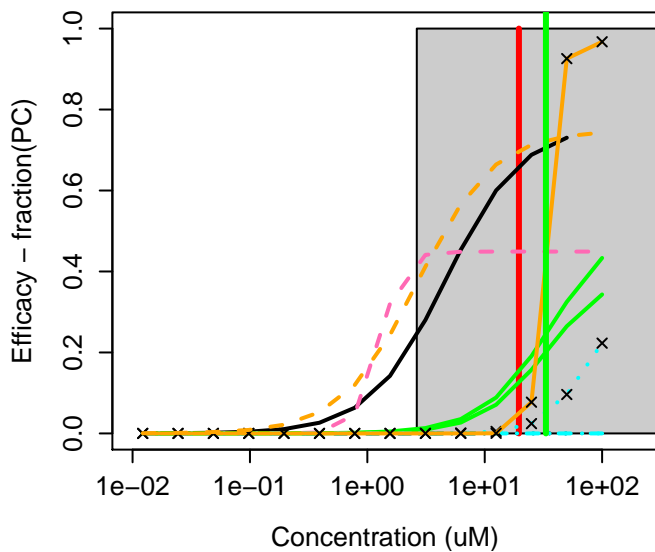

**92-69-3 : 4-Phenylphenol**  
Agonist: 0.015 Antagonist: 0.29

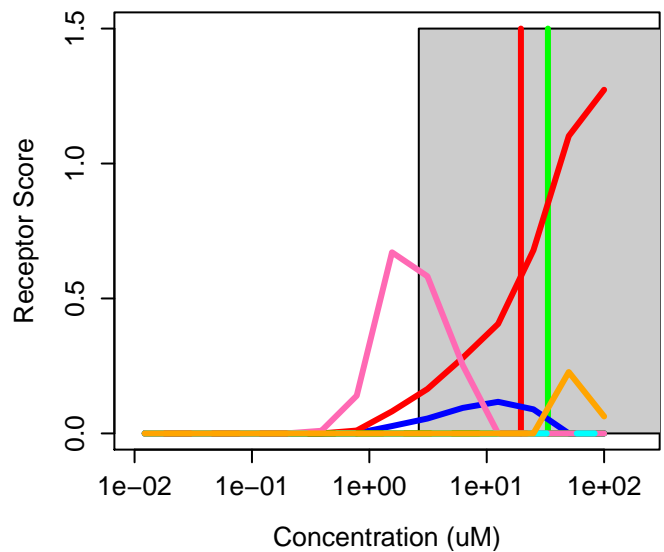

**92-84-2 : Phenothiazine**

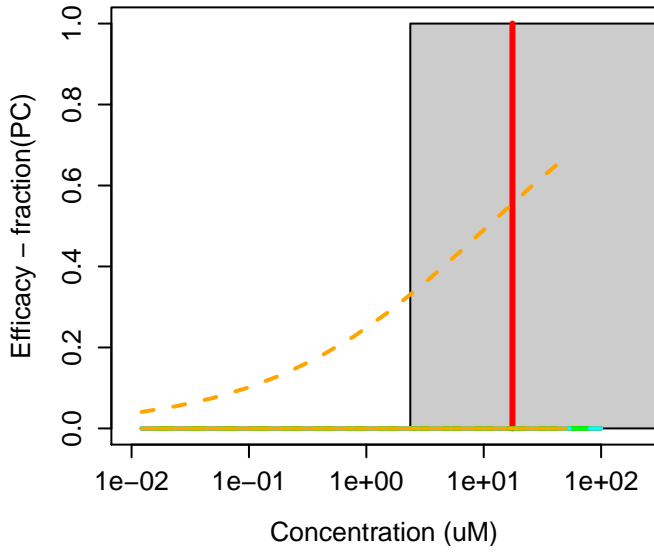

**92-84-2 : Phenothiazine  
Agonist: 0 Antagonist: 0**

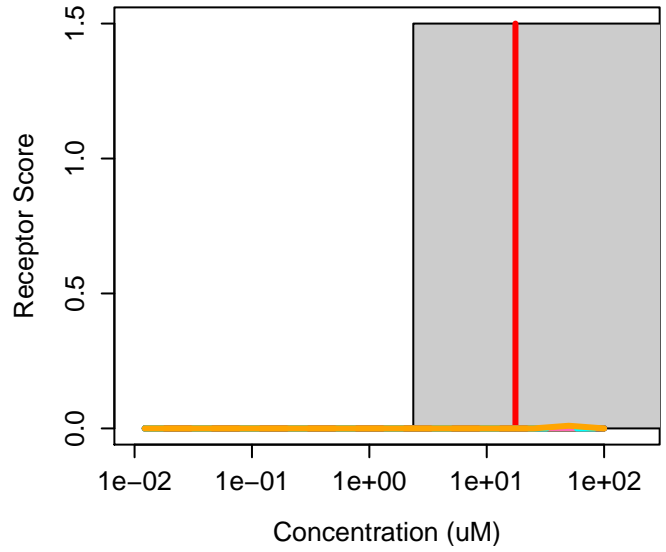

**92-87-5 : Benzidine**

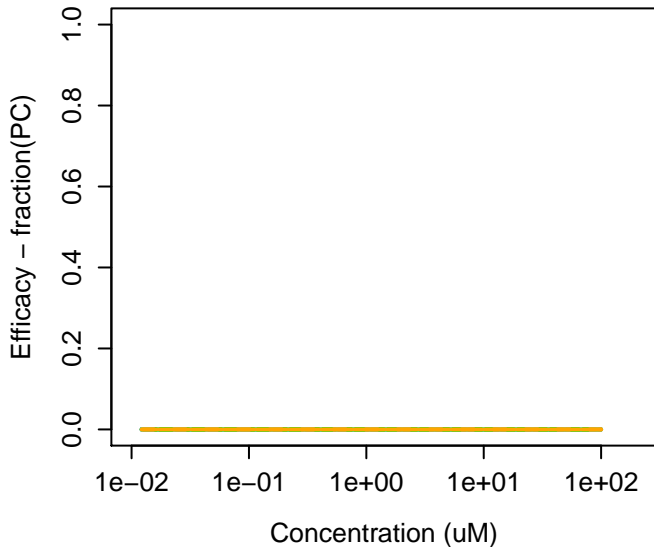

**92-87-5 : Benzidine  
Agonist: 0 Antagonist: 0**



**928-96-1 : (Z)-3-Hexen-1-ol**



**928-96-1 : (Z)-3-Hexen-1-ol  
Agonist: 0 Antagonist: 0**



929-59-9 : 2,2'-[Ethane-1,2-diylbis(oxy)]diethanar Agonist: 0 Antagonist: 0

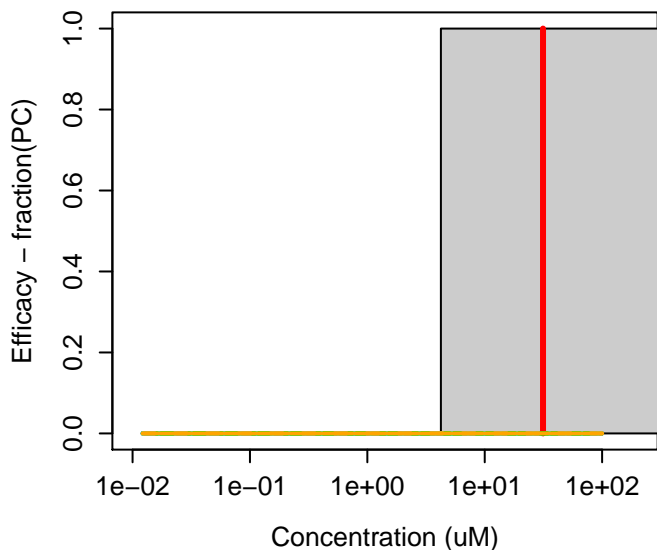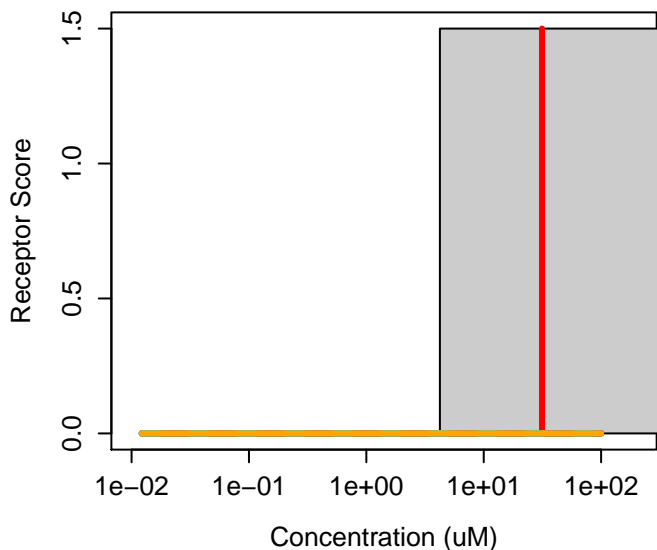

929601-09-2 : SR58611

929601-09-2 : SR58611  
Agonist: 0.00039 Antagonist: 0

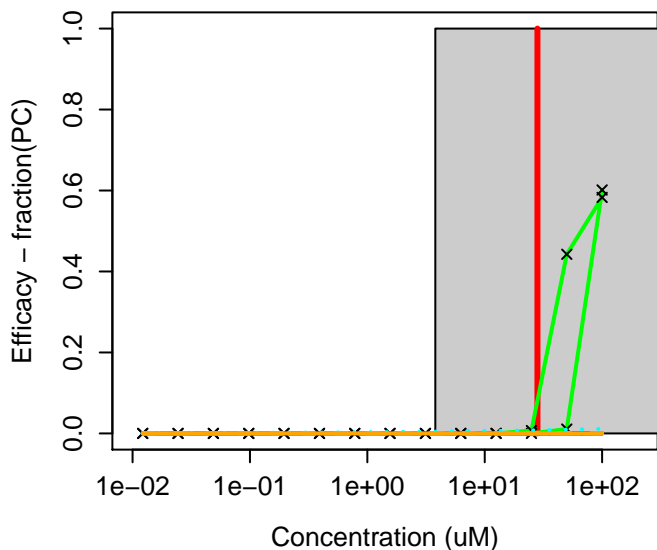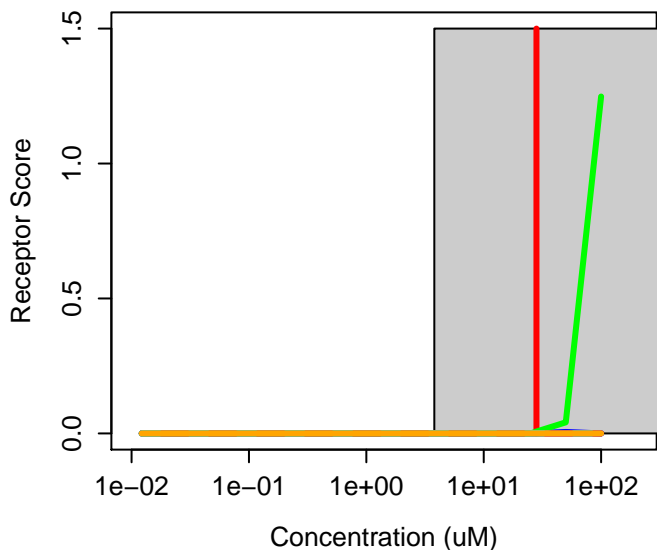

930-55-2 : N-Nitrosopyrrolidine

930-55-2 : N-Nitrosopyrrolidine  
Agonist: 0 Antagonist: 0

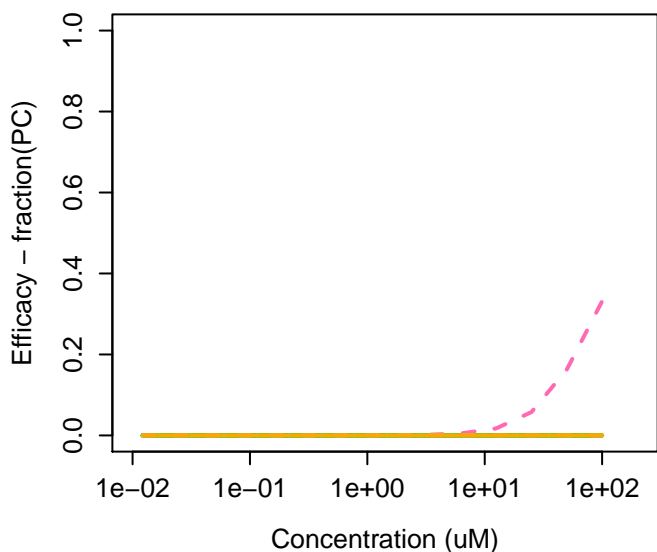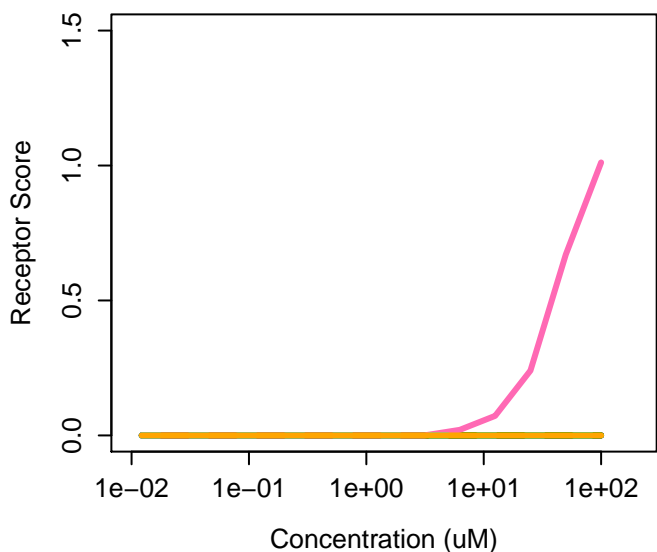

**93-08-3 : 2'-Acetonaphthone**



**93-08-3 : 2'-Acetonaphthone  
Agonist: 0 Antagonist: 0**



**93-15-2 : Methyleugenol**



**93-15-2 : Methyleugenol  
Agonist: 0 Antagonist: 0**



**93-56-1 : Styrene glycol**



**93-56-1 : Styrene glycol  
Agonist: 0 Antagonist: 0**



**93-65-2 : Mecoprop**



**93-65-2 : Mecoprop  
Agonist: 0 Antagonist: 0**



**93-76-5 : 2,4,5-Trichlorophenoxyacetic acid**



**93-76-5 : 2,4,5-Trichlorophenoxyacetic acid  
Agonist: 0 Antagonist: 0**



**938-16-9 : tert-Butyl phenyl ketone**



**938-16-9 : tert-Butyl phenyl ketone  
Agonist: 0 Antagonist: 0**



**93-89-0 : Ethyl benzoate**



**93-89-0 : Ethyl benzoate**  
**Agonist: 0 Antagonist: 0**



**93-92-5 : (+/-)-alpha-Methylbenzyl acetate**

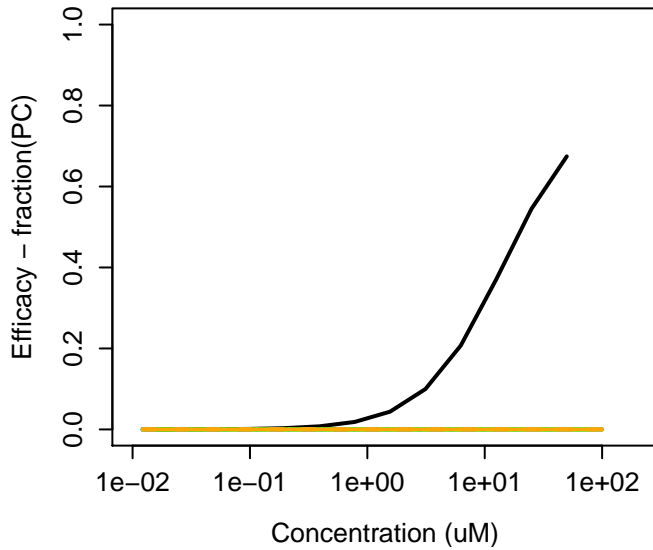

**93-92-5 : (+/-)-alpha-Methylbenzyl acetate**  
**Agonist: 0 Antagonist: 0**

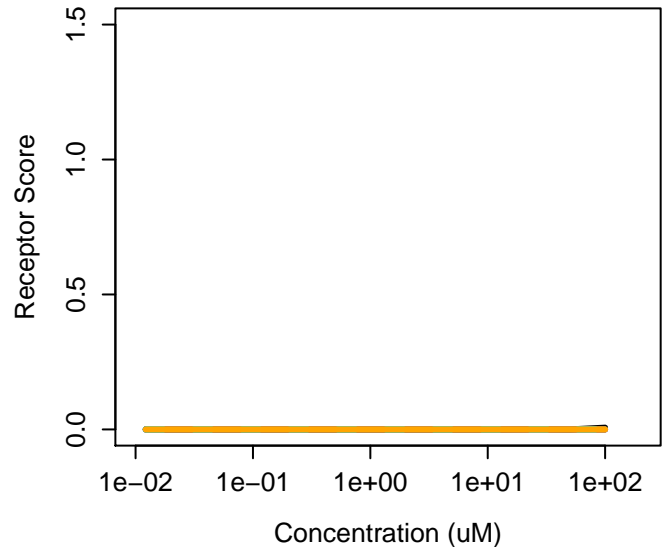

**93-99-2 : Phenyl benzoate**



**93-99-2 : Phenyl benzoate**  
**Agonist: 0 Antagonist: 0**



94-08-6 : Ethyl 4-methylbenzoate



94-08-6 : Ethyl 4-methylbenzoate  
Agonist: 0 Antagonist: 0



94-09-7 : Benzocaine

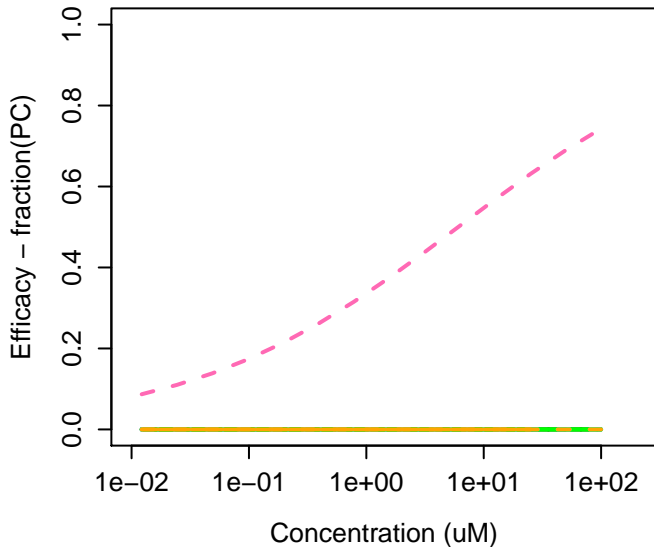

94-09-7 : Benzocaine  
Agonist: 0 Antagonist: 0

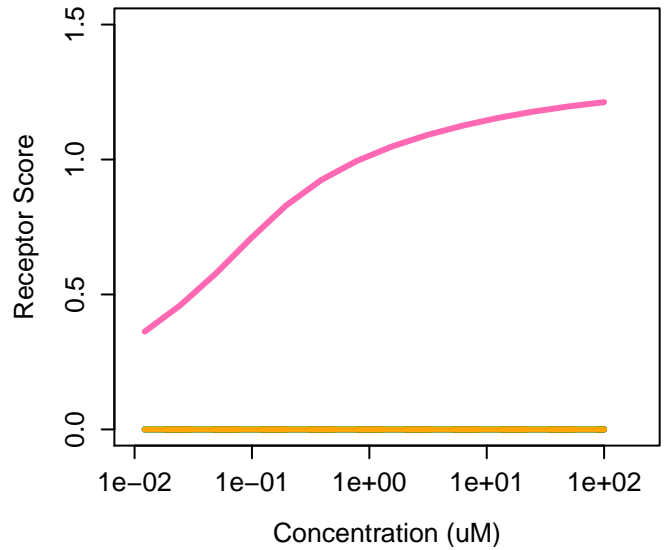

94-13-3 : Propylparaben

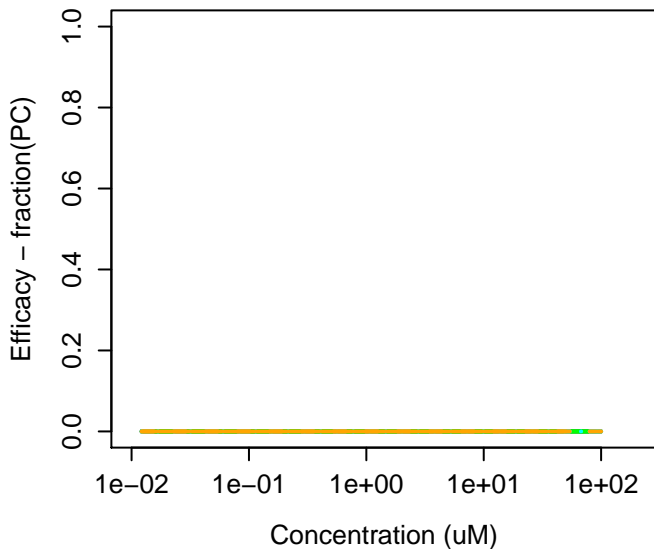

94-13-3 : Propylparaben  
Agonist: 0 Antagonist: 0





941-69-5 : 1-Phenyl-1H-pyrrole-2,5-dione

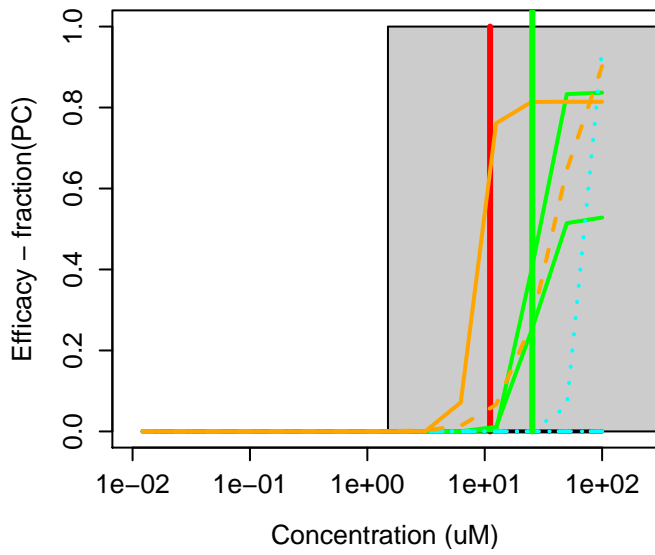

941-69-5 : 1-Phenyl-1H-pyrrole-2,5-dione  
Agonist: 0 Antagonist: 0.2

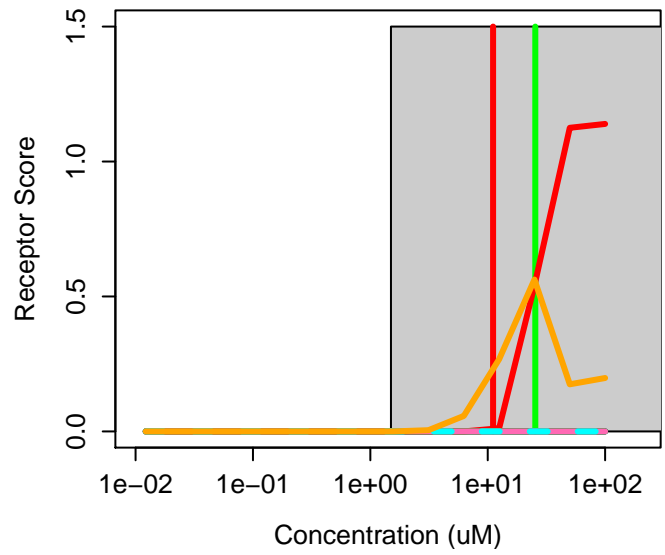

94-18-8 : Benzylparaben

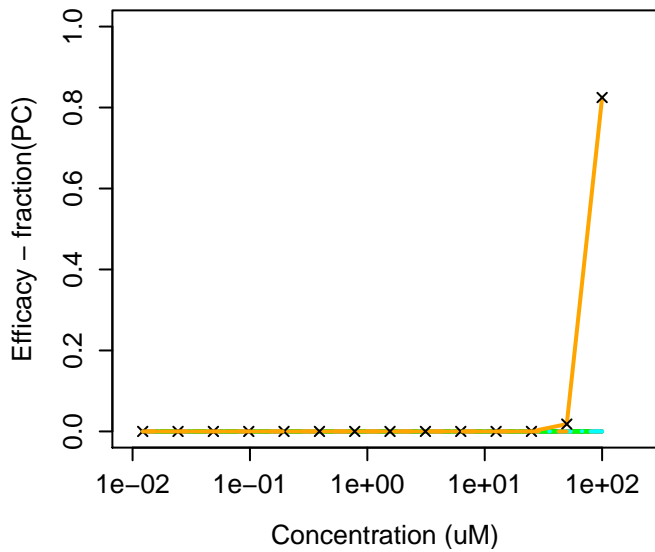

94-18-8 : Benzylparaben  
Agonist: 0 Antagonist: 0



94-26-8 : Butylparaben

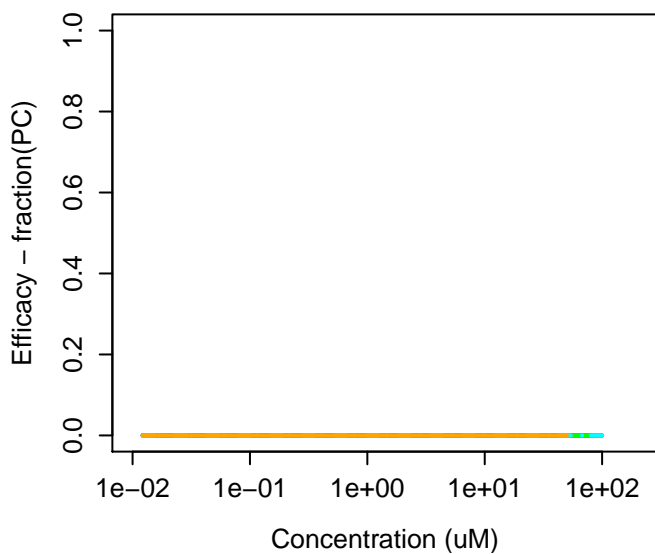

94-26-8 : Butylparaben  
Agonist: 0 Antagonist: 0



94-28-0 : Triethylene glycol bis(2-ethylhexanoate)

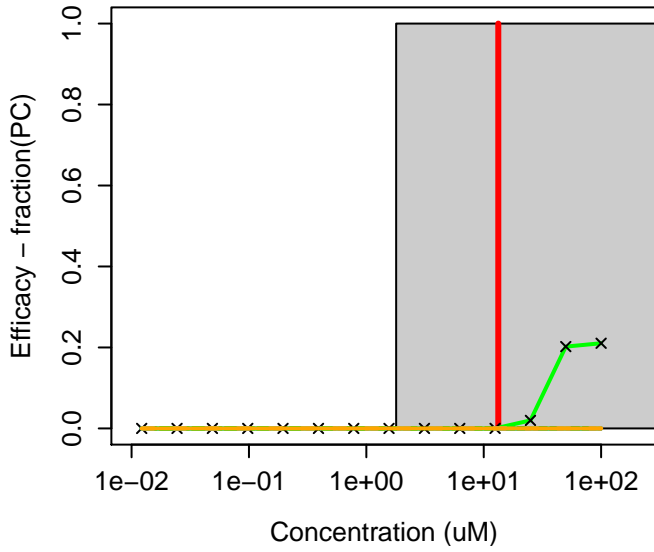

94-28-0 : Triethylene glycol bis(2-ethylhexanoate)  
Agonist: 0 Antagonist: 0

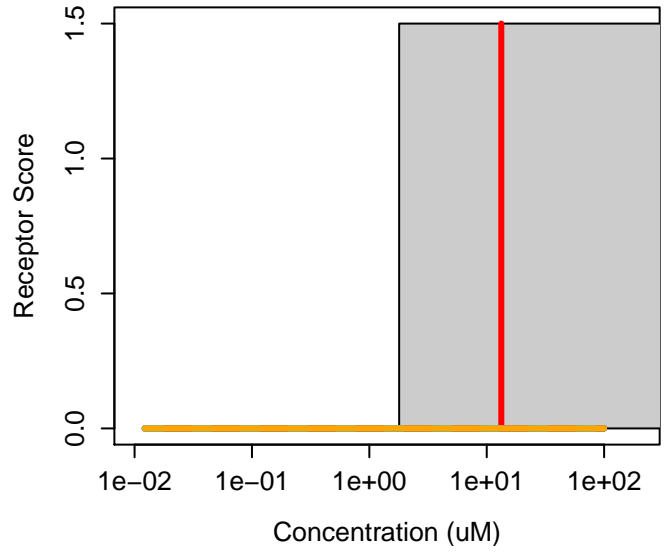

94361-06-5 : Cyproconazole

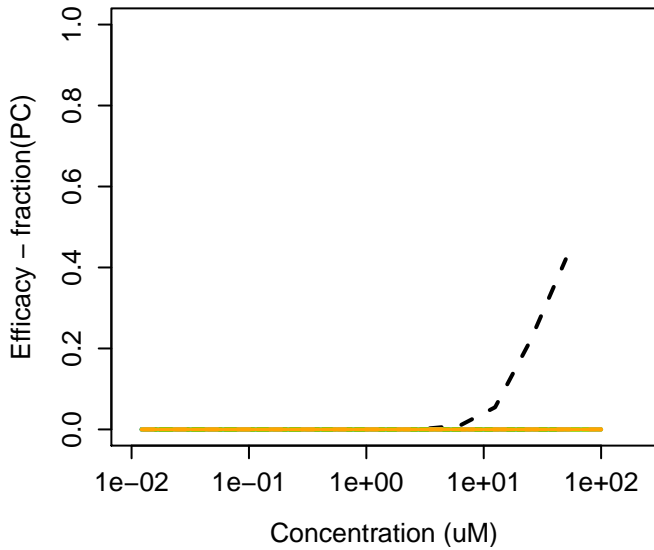

94361-06-5 : Cyproconazole  
Agonist: 0 Antagonist: 0



94-46-2 : Isopentyl benzoate



94-46-2 : Isopentyl benzoate  
Agonist: 0 Antagonist: 0



94-47-3 : 2-Phenylethyl benzoate



94-47-3 : 2-Phenylethyl benzoate  
Agonist: 0 Antagonist: 0



94-59-7 : Safrole

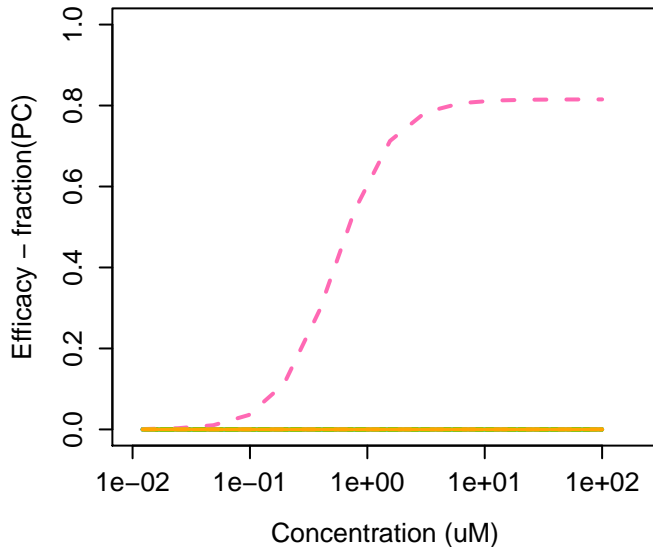

94-59-7 : Safrole  
Agonist: 0 Antagonist: 0

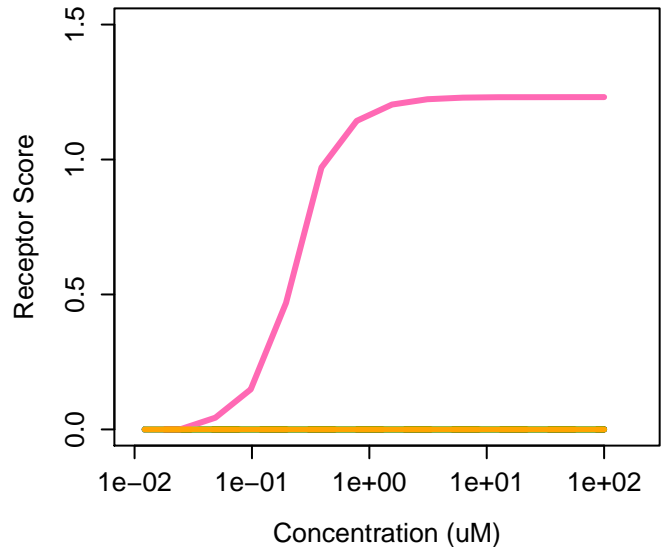

94-60-0 : Dimethyl hexahydroterephthalate



94-60-0 : Dimethyl hexahydroterephthalate  
Agonist: 0 Antagonist: 0



**94-71-3 : 2-Ethoxyphenol**



**94-71-3 : 2-Ethoxyphenol**  
**Agonist: 0 Antagonist: 0**



**94-74-6 : MCPA**

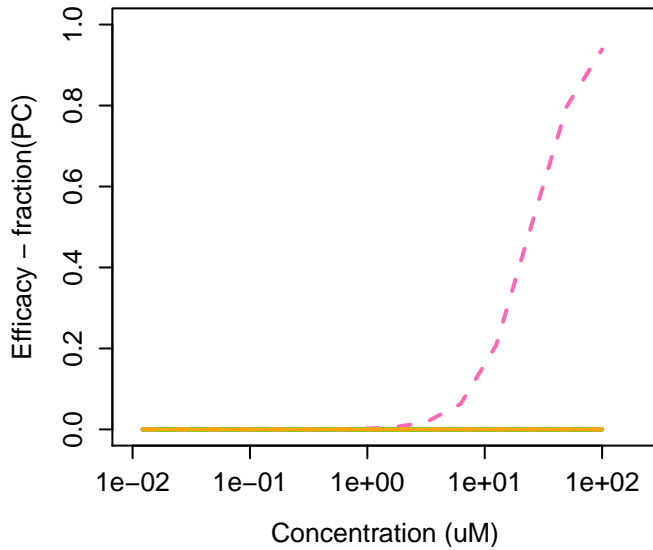

**94-74-6 : MCPA**  
**Agonist: 0 Antagonist: 0**

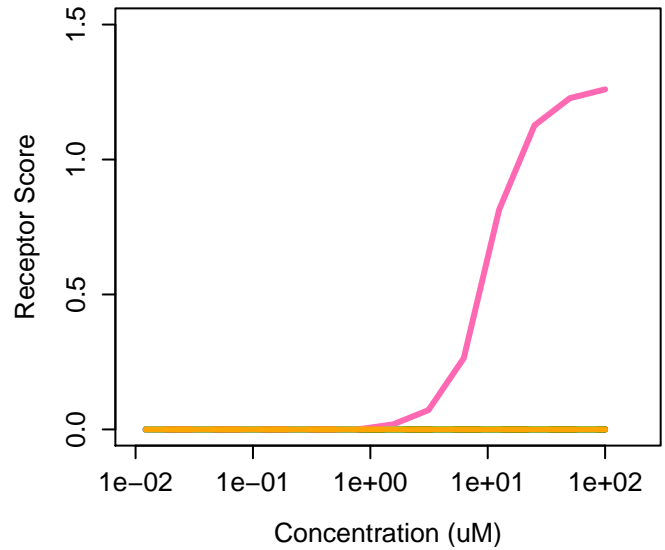

**94-75-7 : 2,4-Dichlorophenoxyacetic acid**

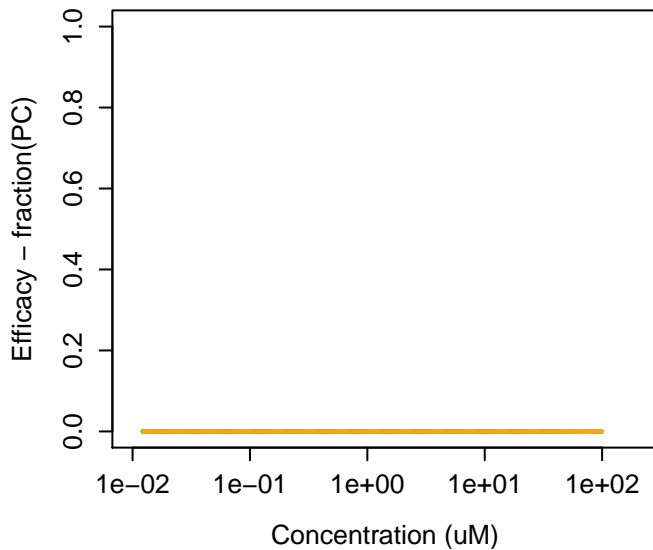

**94-75-7 : 2,4-Dichlorophenoxyacetic acid**  
**Agonist: 0 Antagonist: 0**



**94-80-4 : 2,4-D 1-butyl ester**



**94-80-4 : 2,4-D 1-butyl ester**  
**Agonist: 0 Antagonist: 0**



**94-81-5 : MCPB**



**94-81-5 : MCPB**  
**Agonist: 0 Antagonist: 0**



**94-82-6 : 2,4-DB**

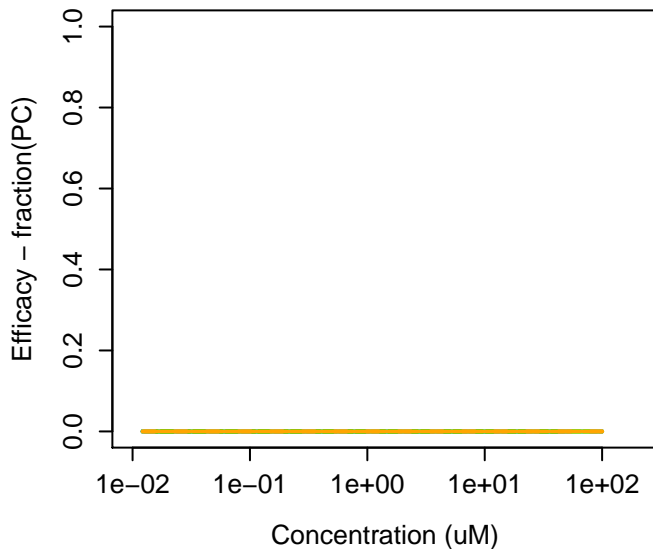

**94-82-6 : 2,4-DB**  
**Agonist: 0 Antagonist: 0**



94-91-7 : N,N'-Disalicylidene-1,2-diaminopropan



94-91-7 : N,N'-Disalicylidene-1,2-diaminopropan  
Agonist: 0 Antagonist: 0



94-96-2 : 2-Ethyl-1,3-hexanediol



94-96-2 : 2-Ethyl-1,3-hexanediol  
Agonist: 0 Antagonist: 0



950-37-8 : Methidathion

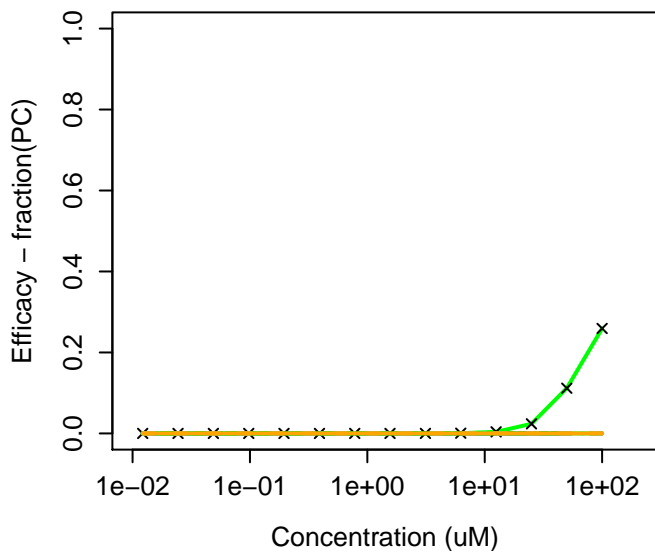

950-37-8 : Methidathion  
Agonist: 0 Antagonist: 0



95-13-6 : Indene



95-13-6 : Indene  
Agonist: 0 Antagonist: 0



95-14-7 : 1,2,3-Benzotriazole



95-14-7 : 1,2,3-Benzotriazole  
Agonist: 0 Antagonist: 0



95-16-9 : Benzothiazole

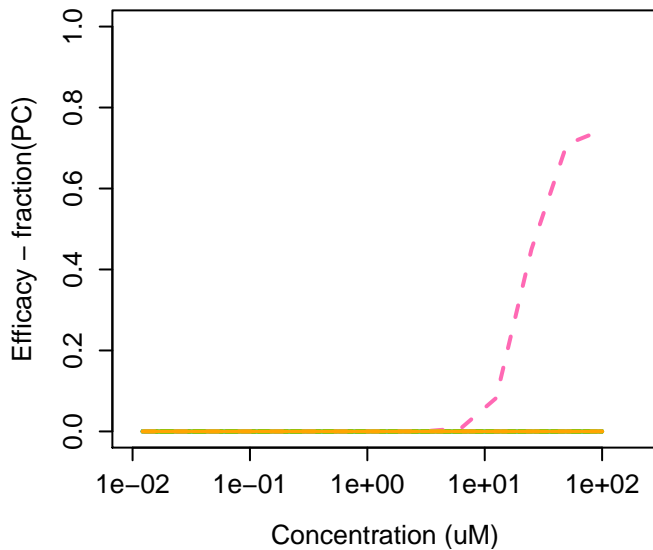

95-16-9 : Benzothiazole  
Agonist: 0 Antagonist: 0

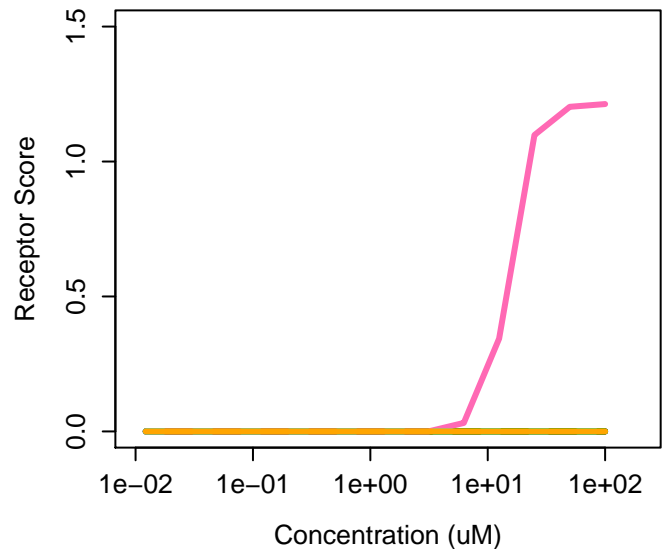

95266-40-3 : Trinexapac-ethyl



95266-40-3 : Trinexapac-ethyl  
Agonist: 0 Antagonist: 0



95-38-5 : 2-(8-Heptadecenyl)-2-imidazoline-1-eth 95-38-5 : 2-(8-Heptadecenyl)-2-imidazoline-1-eth  
Agonist: 0.056 Antagonist: 0.084

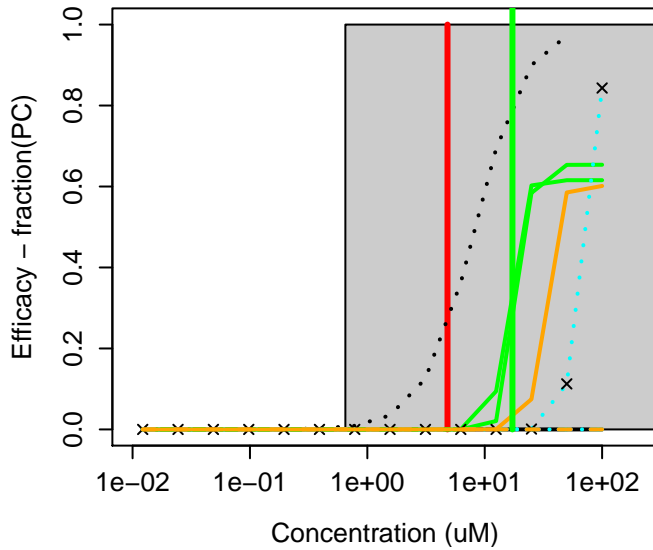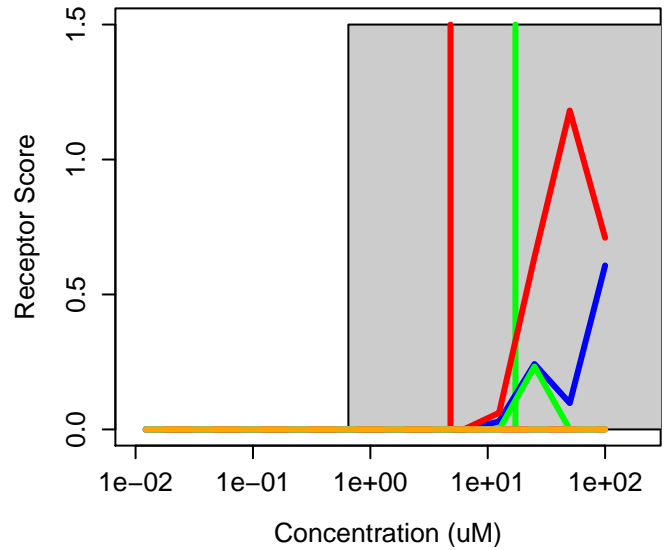

95-48-7 : o-Cresol

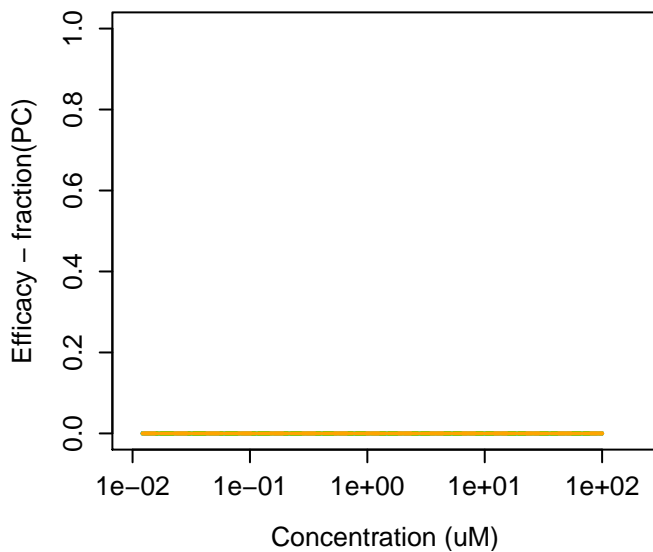

95-48-7 : o-Cresol  
Agonist: 0 Antagonist: 0





**95-49-8 : 2-Chlorotoluene**



**95-49-8 : 2-Chlorotoluene  
Agonist: 0 Antagonist: 0**



**95-50-1 : 1,2-Dichlorobenzene**



**95-50-1 : 1,2-Dichlorobenzene  
Agonist: 0 Antagonist: 0**



**95-53-4 : 2-Methylaniline**



**95-53-4 : 2-Methylaniline  
Agonist: 0 Antagonist: 0**



95-54-5 : 1,2-Phenylenediamine

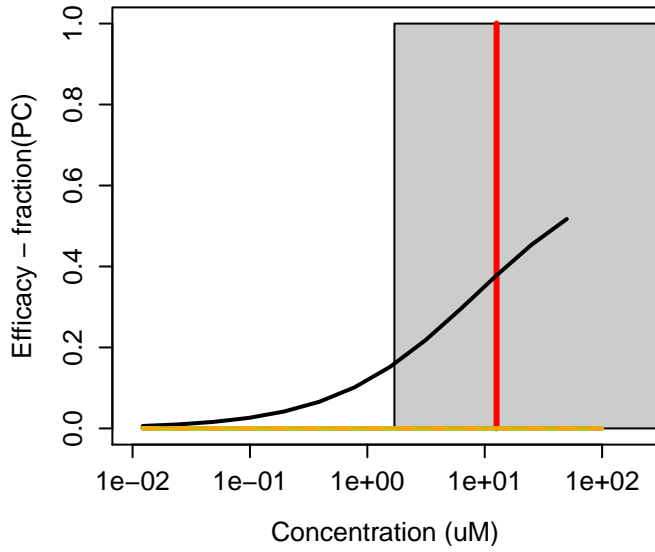

95-54-5 : 1,2-Phenylenediamine  
Agonist: 0 Antagonist: 0

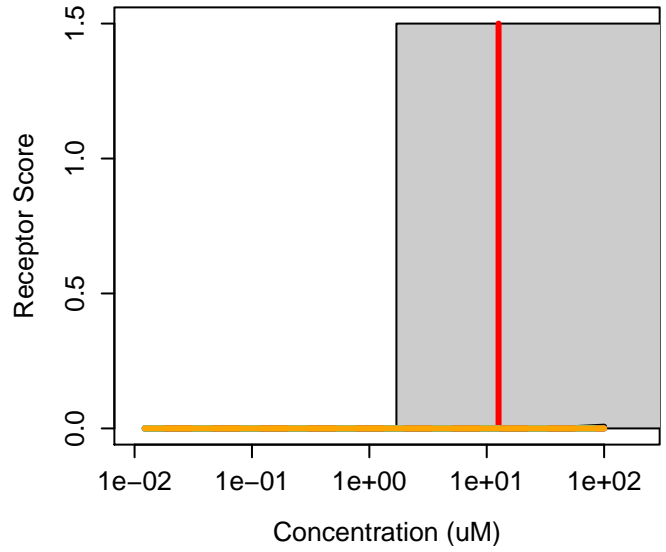

95-57-8 : 2-Chlorophenol



95-57-8 : 2-Chlorophenol  
Agonist: 0 Antagonist: 0



95-63-6 : 1,2,4-Trimethylbenzene



95-63-6 : 1,2,4-Trimethylbenzene  
Agonist: 0 Antagonist: 0



95-65-8 : 3,4-Dimethylphenol



95-65-8 : 3,4-Dimethylphenol  
Agonist: 0 Antagonist: 0



95737-68-1 : Pyriproxyfen

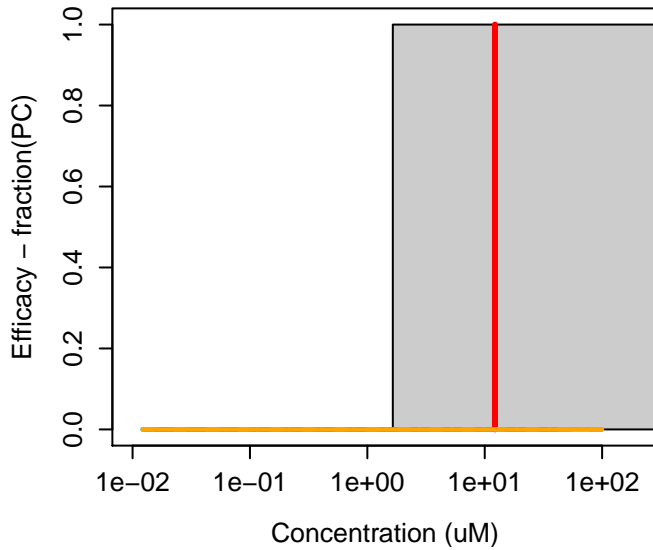

95737-68-1 : Pyriproxyfen  
Agonist: 0 Antagonist: 0

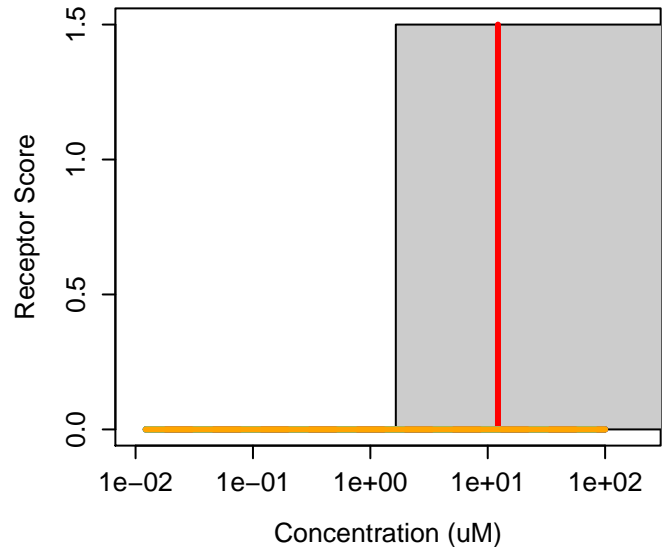

95-74-9 : 3-Chloro-4-methylaniline



95-74-9 : 3-Chloro-4-methylaniline  
Agonist: 0 Antagonist: 0



**957-51-7 : Diphenamid**



**957-51-7 : Diphenamid  
Agonist: 0 Antagonist: 0**



**95-76-1 : 3,4-Dichloroaniline**



**95-76-1 : 3,4-Dichloroaniline  
Agonist: 0 Antagonist: 0**



**95-80-7 : 2,4-Diaminotoluene**



**95-80-7 : 2,4-Diaminotoluene  
Agonist: 0 Antagonist: 0**



95-83-0 : 4-Chloro-1,2-diaminobenzene

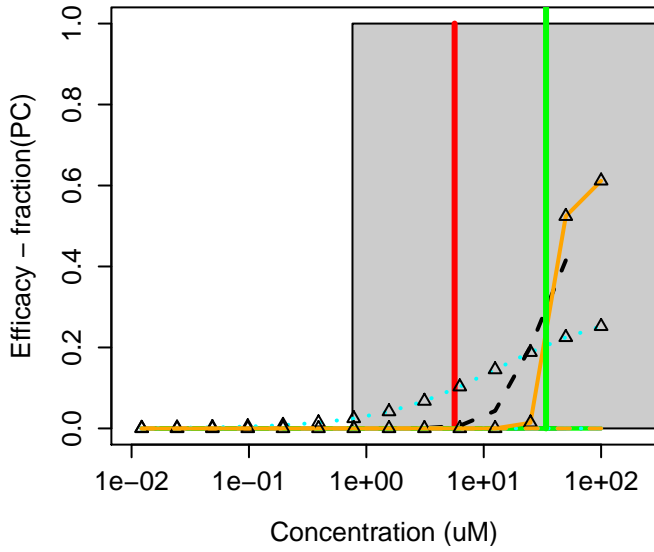

95-83-0 : 4-Chloro-1,2-diaminobenzene  
Agonist: 0.0032 Antagonist: 0.04

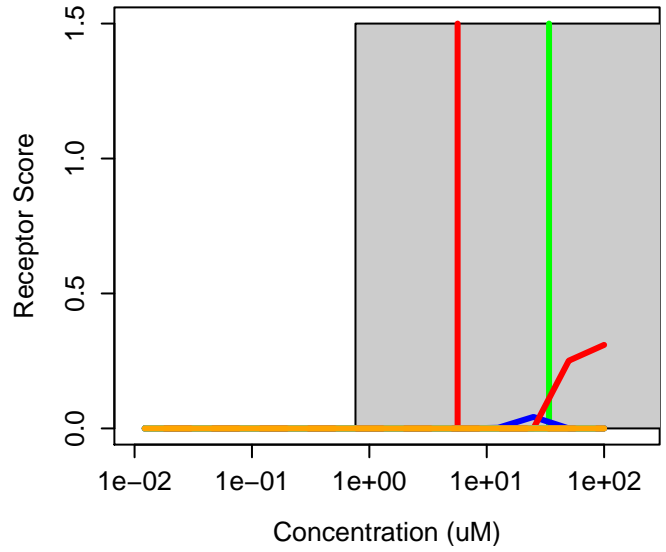

95-87-4 : 2,5-Dimethylphenol



95-87-4 : 2,5-Dimethylphenol  
Agonist: 0 Antagonist: 0



95-93-2 : 1,2,4,5-Tetramethylbenzene

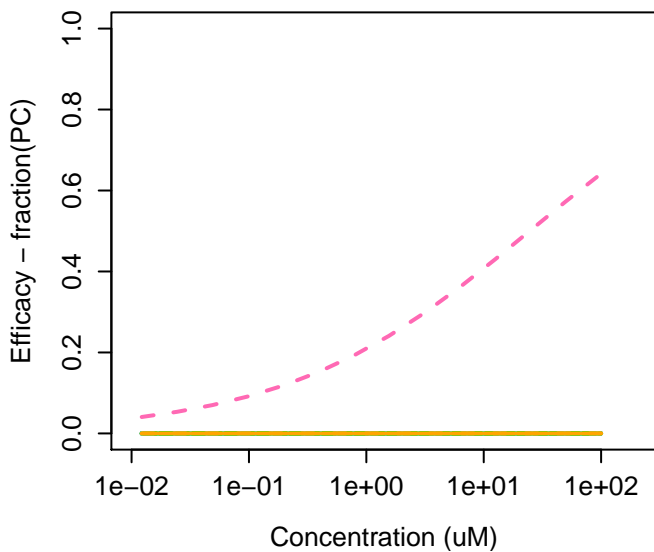

95-93-2 : 1,2,4,5-Tetramethylbenzene  
Agonist: 0 Antagonist: 0

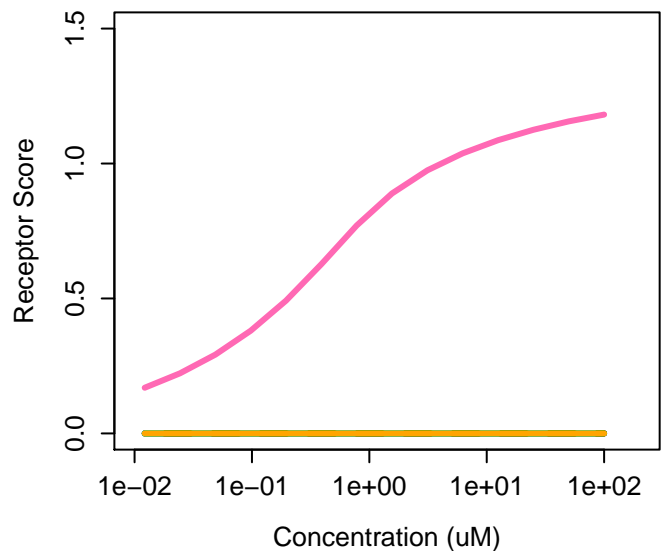

**95-94-3 : 1,2,4,5-Tetrachlorobenzene**



**95-94-3 : 1,2,4,5-Tetrachlorobenzene**  
Agonist: 0 Antagonist: 0



**95-95-4 : 2,4,5-Trichlorophenol**

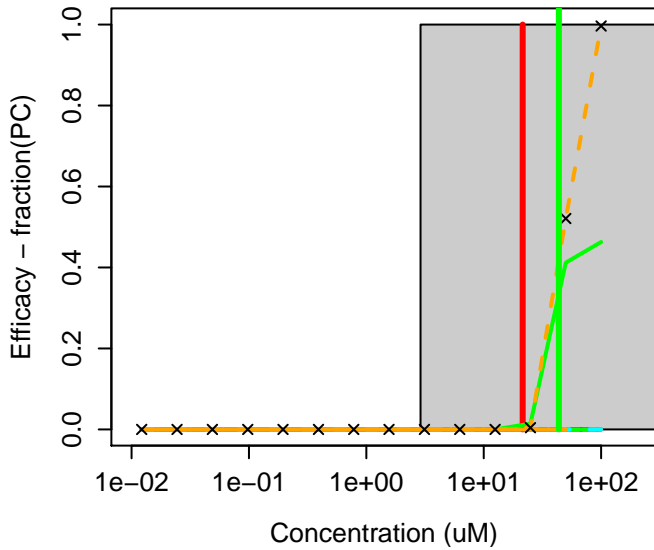

**95-95-4 : 2,4,5-Trichlorophenol**  
Agonist: 0 Antagonist: 0.041

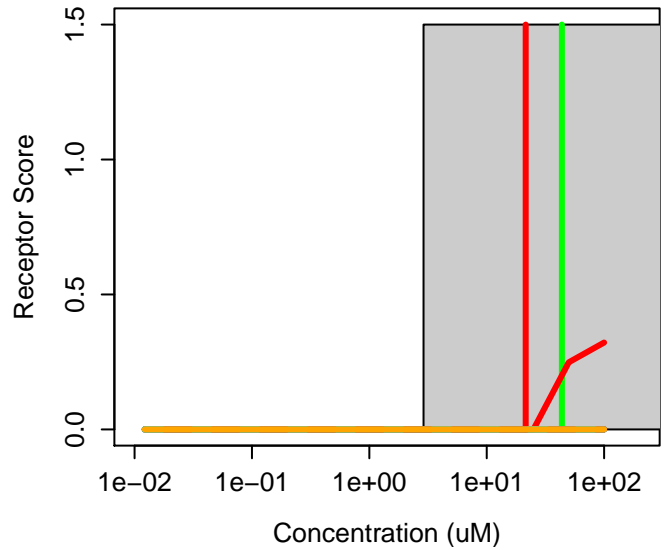

**959-98-8 : Endosulfan I**

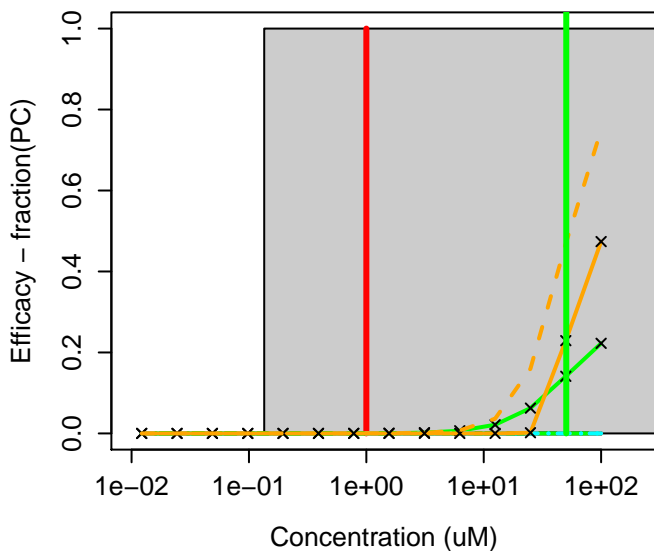

**959-98-8 : Endosulfan I**  
Agonist: 0 Antagonist: 0.023

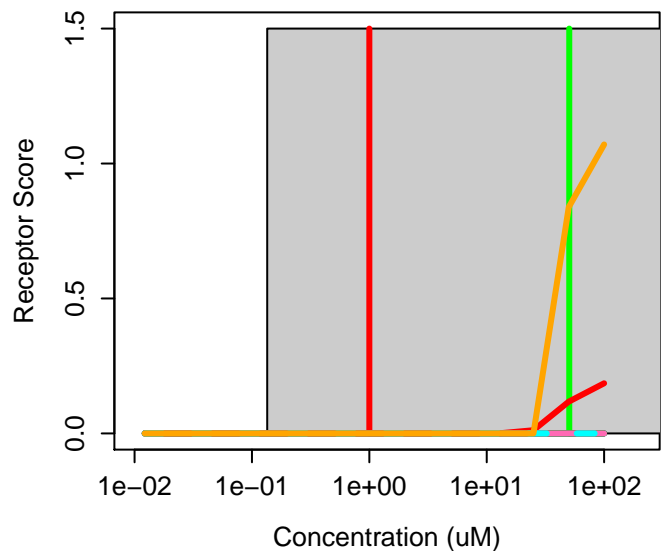

960-71-4 : Triphenylborane

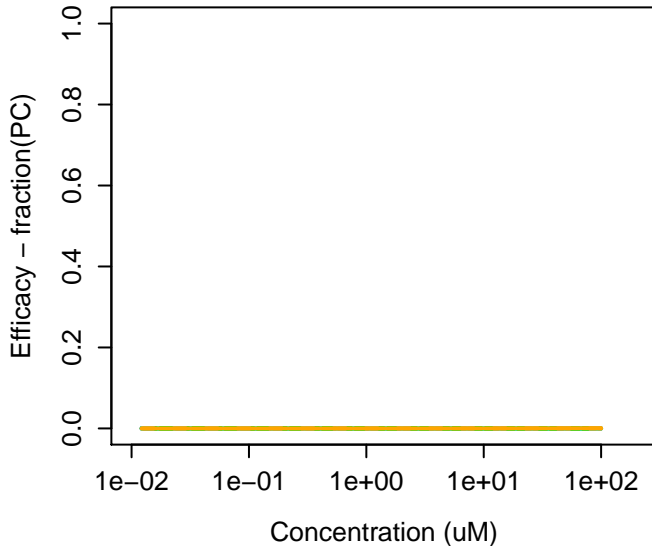

960-71-4 : Triphenylborane  
Agonist: 0 Antagonist: 0



96-09-3 : Styrene oxide

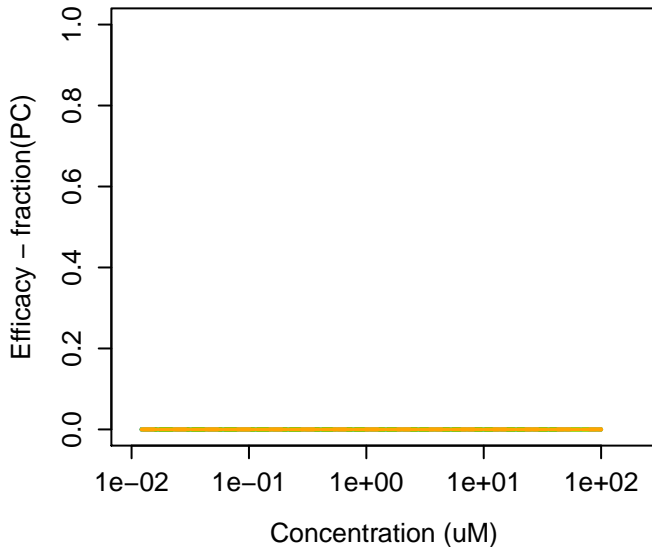

96-09-3 : Styrene oxide  
Agonist: 0 Antagonist: 0



96182-53-5 : Tebupirimfos

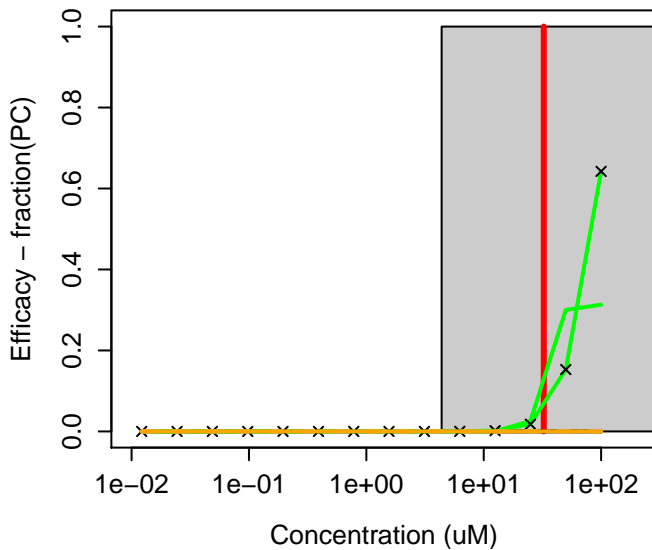

96182-53-5 : Tebupirimfos  
Agonist: 0 Antagonist: 0

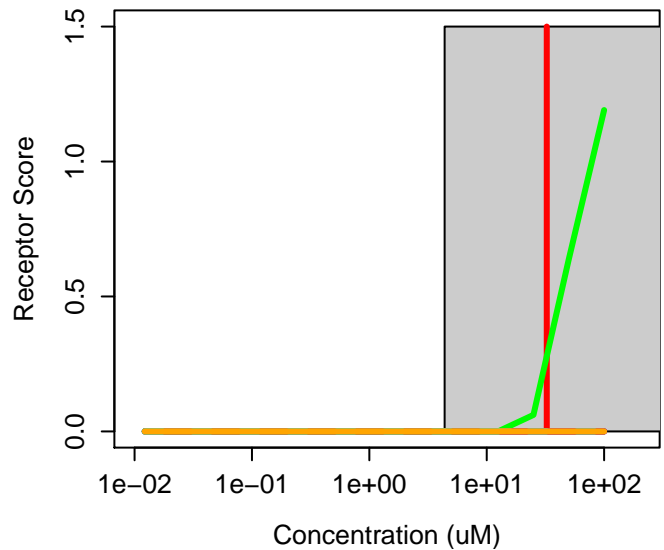

**96-18-4 : 1,2,3-Trichloropropane**



**96-18-4 : 1,2,3-Trichloropropane  
Agonist: 0 Antagonist: 0**



**96-23-1 : 1,3-Dichloro-2-propanol**



**96-23-1 : 1,3-Dichloro-2-propanol  
Agonist: 0 Antagonist: 0**



**96-24-2 : 3-Chloro-1,2-propanediol**

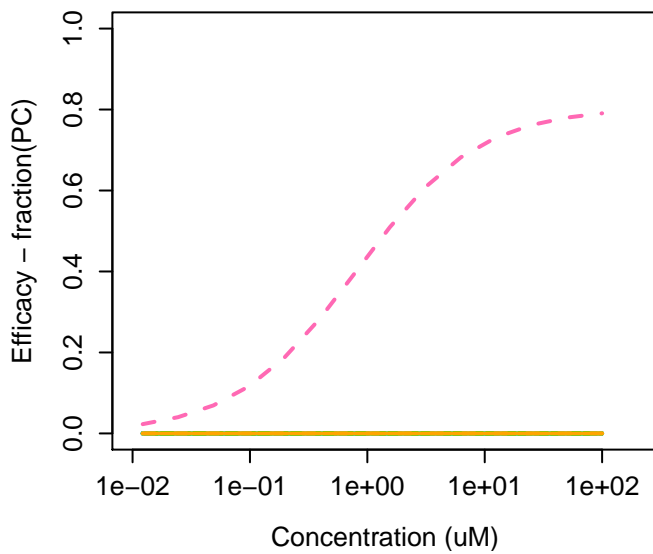

**96-24-2 : 3-Chloro-1,2-propanediol  
Agonist: 0 Antagonist: 0**

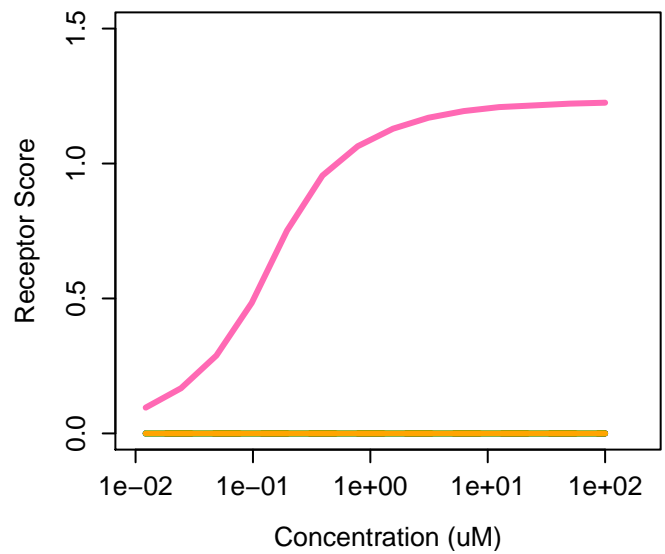



**962-58-3 : Diazoxon**

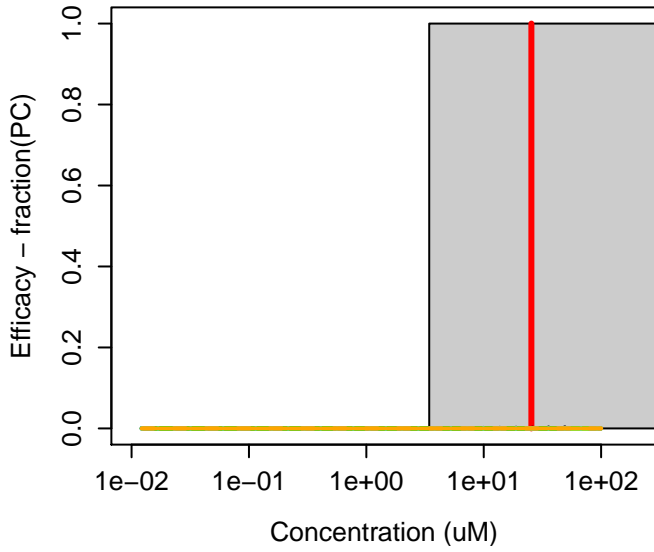

**962-58-3 : Diazoxon  
Agonist: 0 Antagonist: 0**

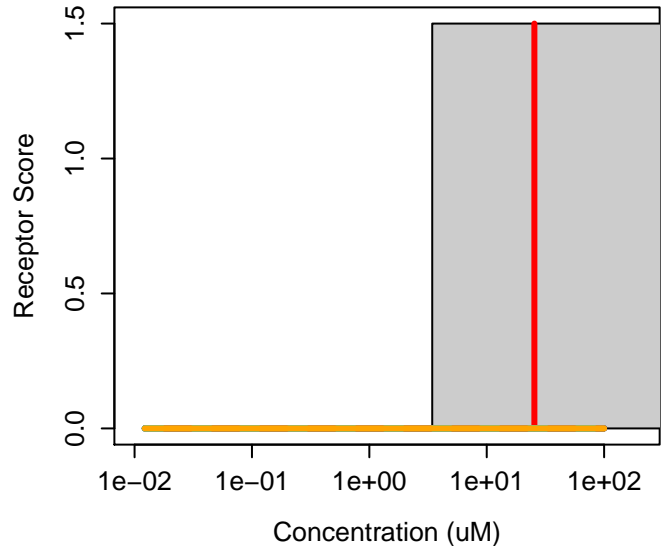

**96-29-7 : 2-Butanone oxime**

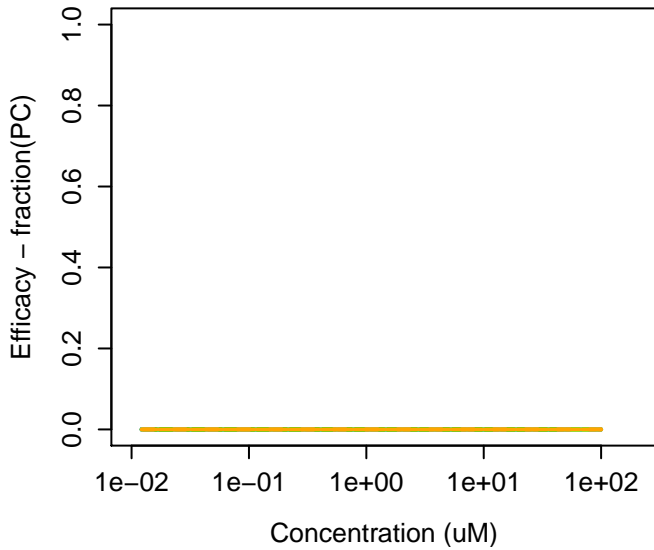

**96-29-7 : 2-Butanone oxime  
Agonist: 0 Antagonist: 0**



**96-41-3 : Cyclopentanol**



**96-41-3 : Cyclopentanol  
Agonist: 0 Antagonist: 0**



96-45-7 : Ethylene thiourea

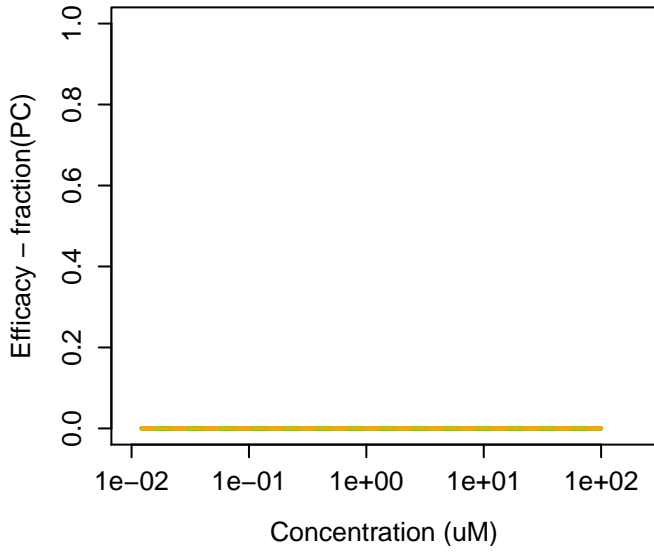

96-45-7 : Ethylene thiourea  
Agonist: 0 Antagonist: 0



96-48-0 : 4-Butyrolactone



96-48-0 : 4-Butyrolactone  
Agonist: 0 Antagonist: 0



96489-71-3 : Pyridaben

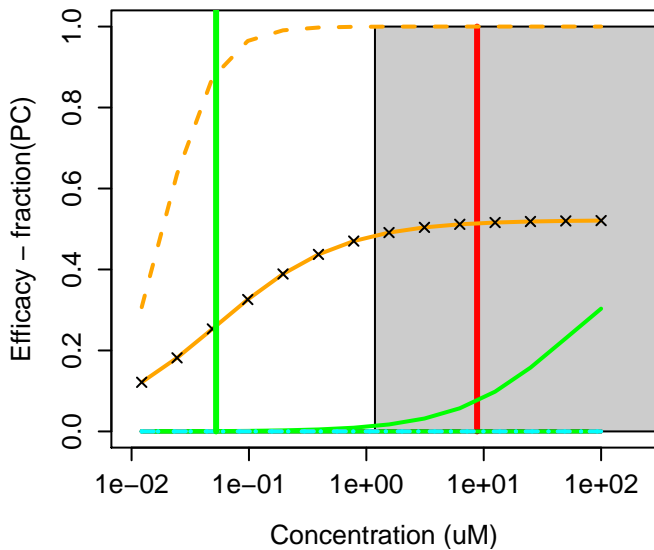

96489-71-3 : Pyridaben  
Agonist: 0 Antagonist: 0.054

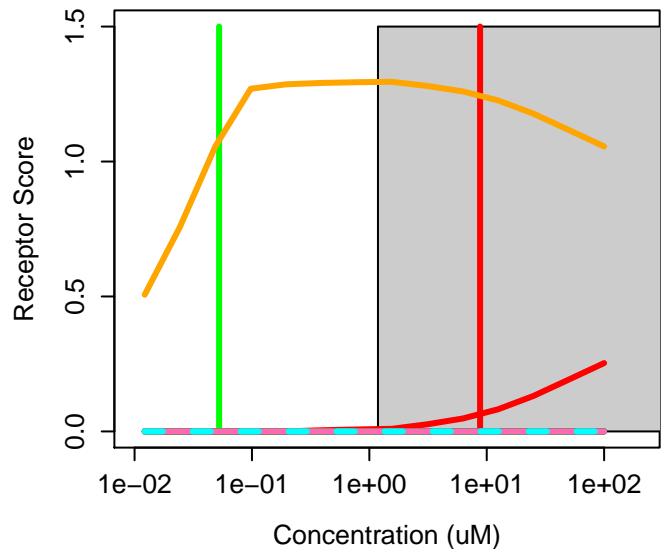

**96-70-8 : 2-tert-Butyl-4-ethylphenol**

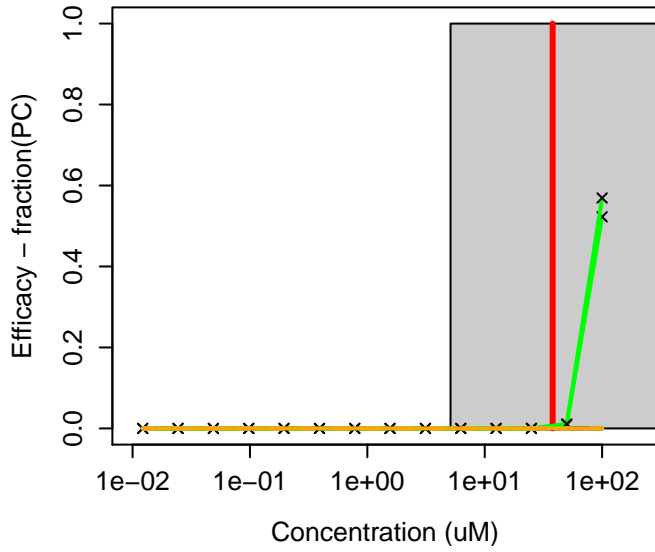

**96-70-8 : 2-tert-Butyl-4-ethylphenol**  
Agonist: 0 Antagonist: 0

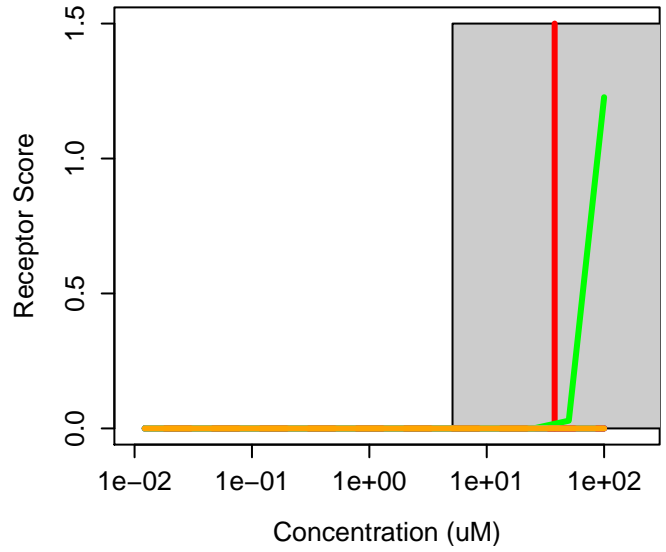

**96-76-4 : 2,4-Di-tert-butylphenol**

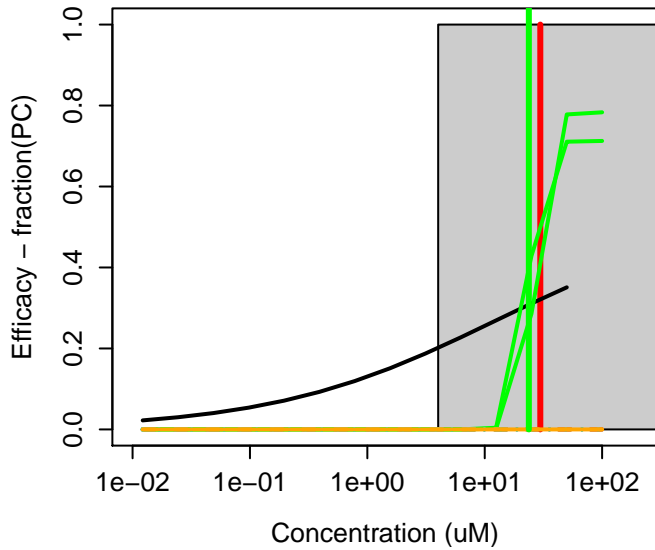

**96-76-4 : 2,4-Di-tert-butylphenol**  
Agonist: 0.024 Antagonist: 0.047

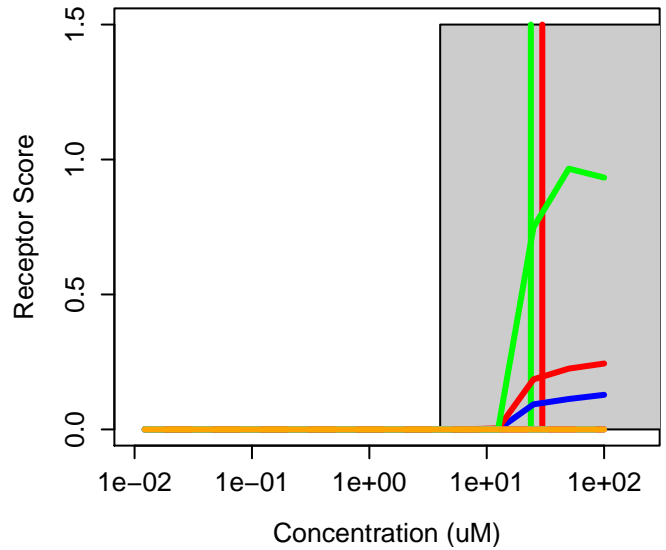

**96-83-3 : Iopanoic acid**

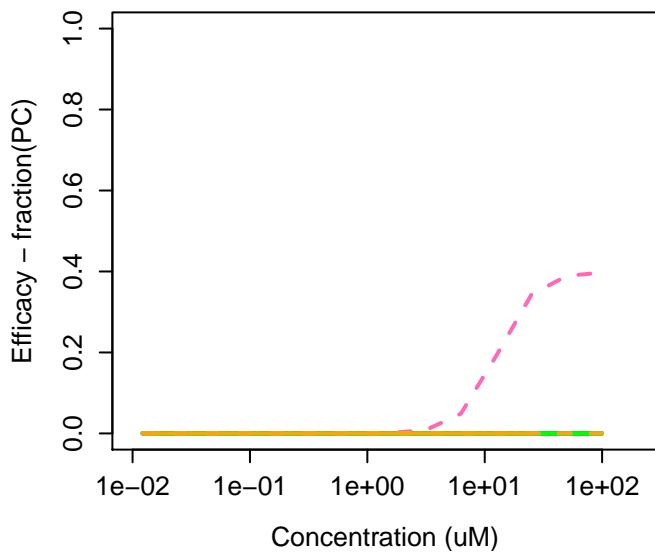

**96-83-3 : Iopanoic acid**  
Agonist: 0 Antagonist: 0

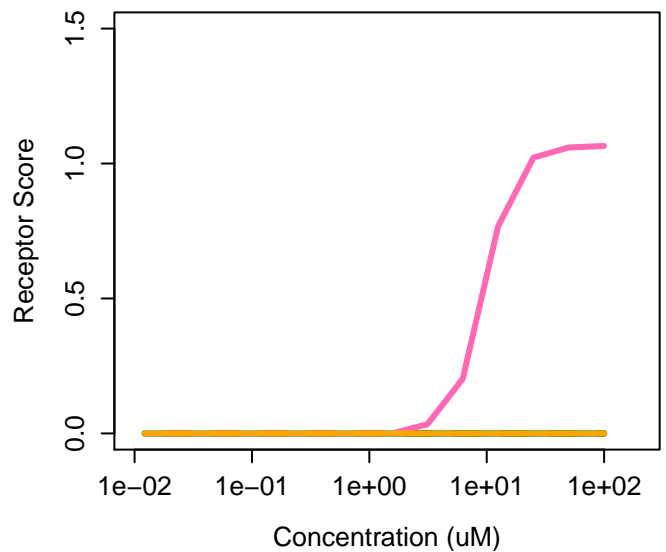

97-00-7 : 1-Chloro-2,4-dinitrobenzene

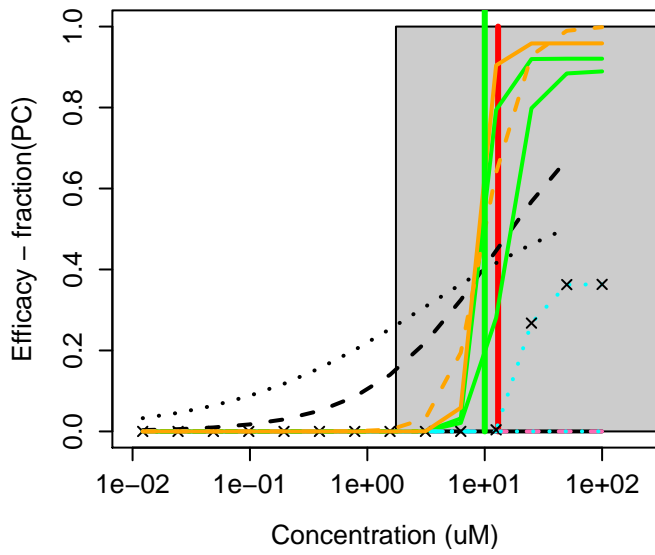

97-00-7 : 1-Chloro-2,4-dinitrobenzene  
Agonist: 0 Antagonist: 0.44

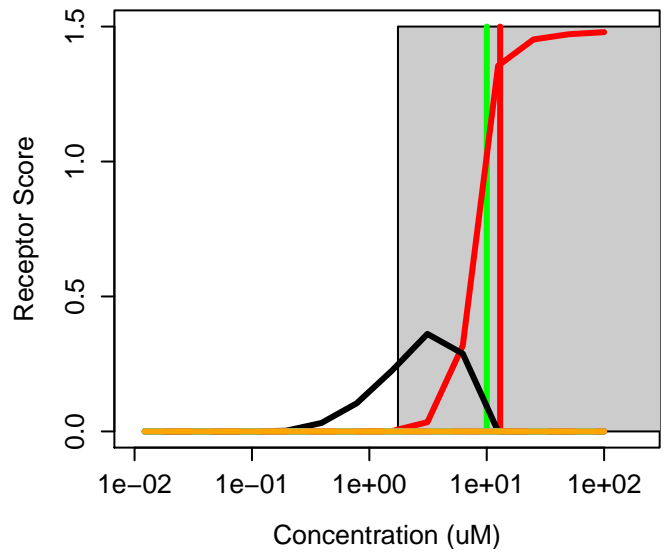

97-23-4 : Dichlorophen

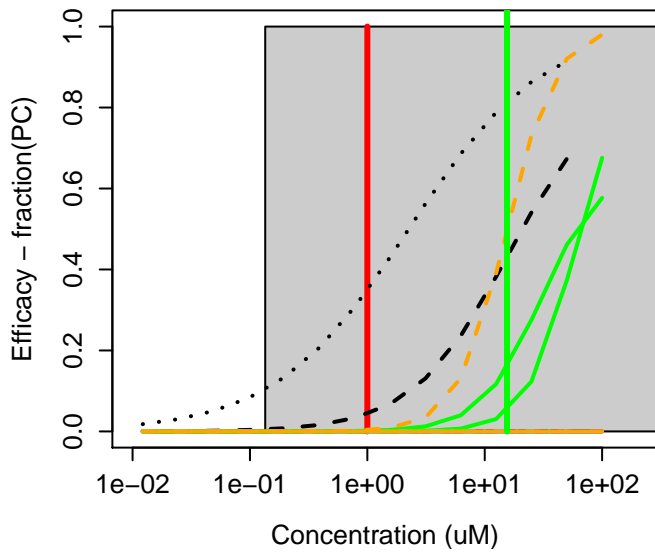

97-23-4 : Dichlorophen  
Agonist: 0 Antagonist: 0.34

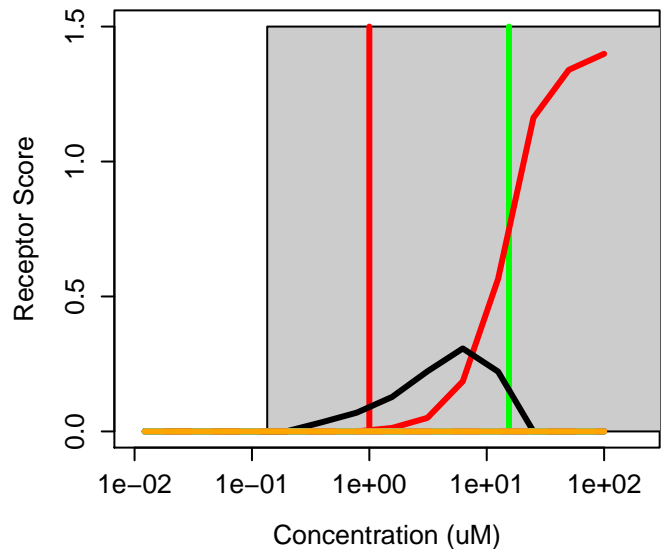

97322-87-7 : Troglitazone

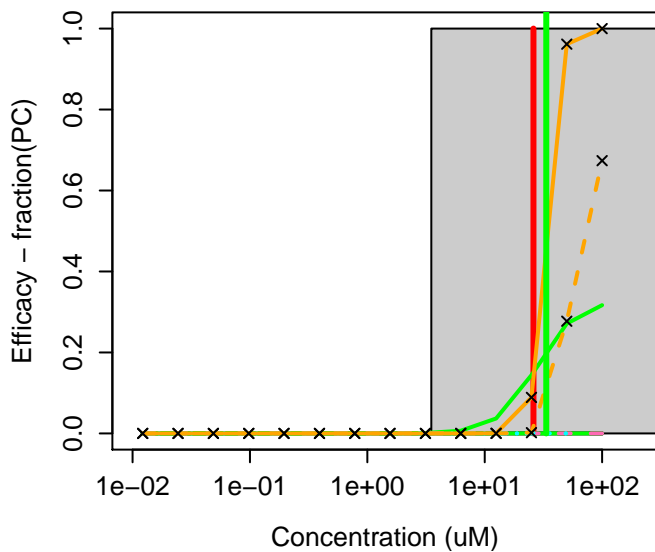

97322-87-7 : Troglitazone  
Agonist: 0 Antagonist: 0.036

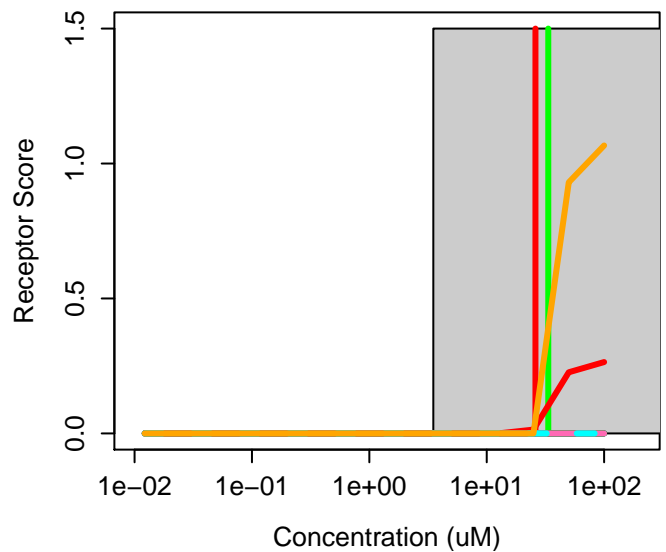

97-52-9 : 2-Methoxy-4-nitroaniline

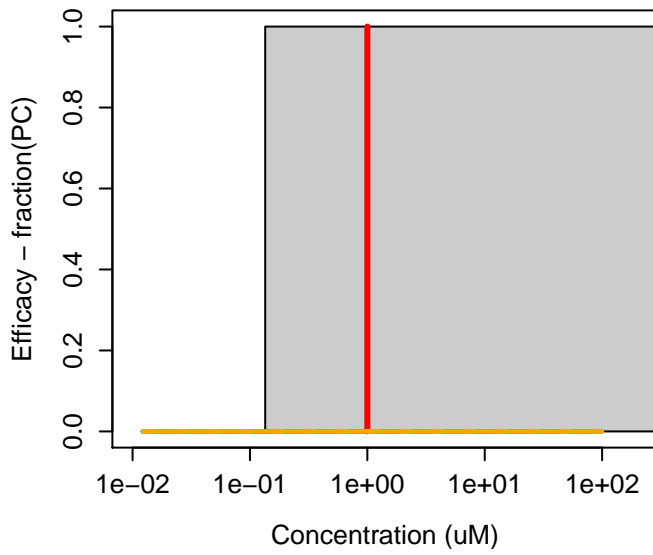

97-52-9 : 2-Methoxy-4-nitroaniline  
Agonist: 0 Antagonist: 0

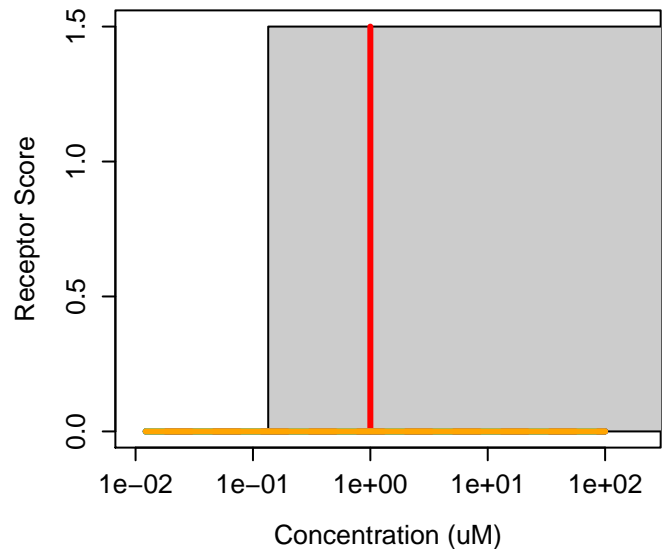

97-53-0 : Eugenol

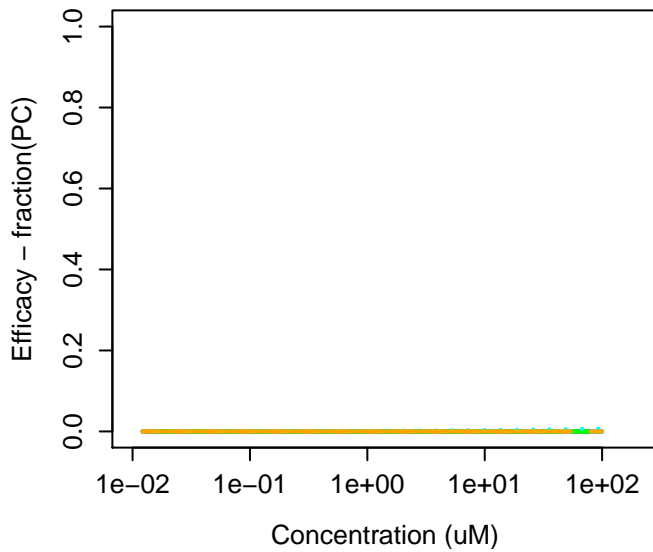

97-53-0 : Eugenol  
Agonist: 0 Antagonist: 0

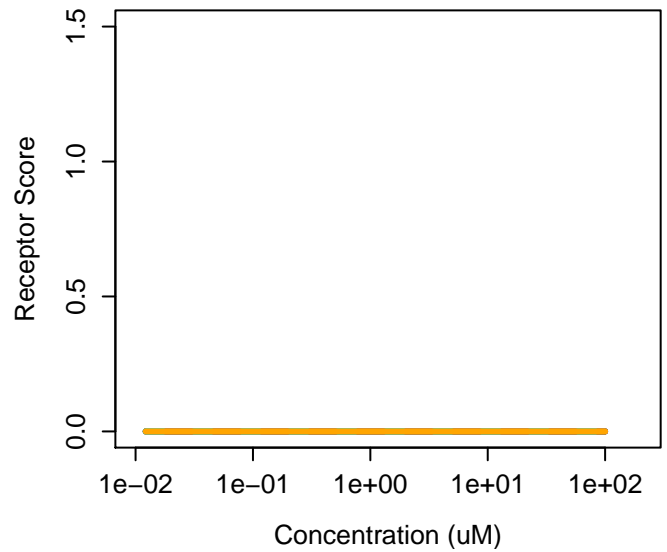

97-54-1 : Isoeugenol

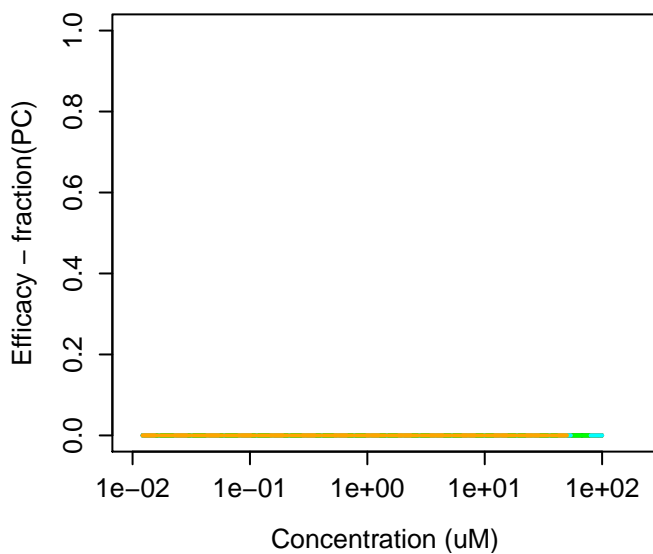

97-54-1 : Isoeugenol  
Agonist: 0 Antagonist: 0



97-56-3 : 2-Amino-5-azotoluene

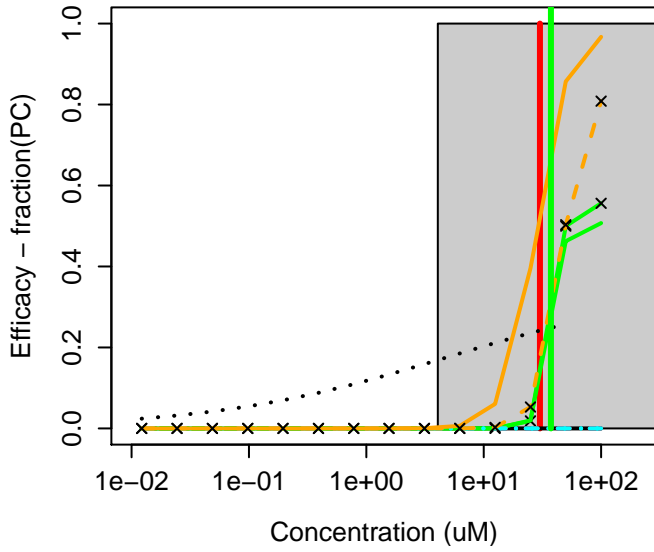

97-56-3 : 2-Amino-5-azotoluene  
Agonist: 0 Antagonist: 0.17

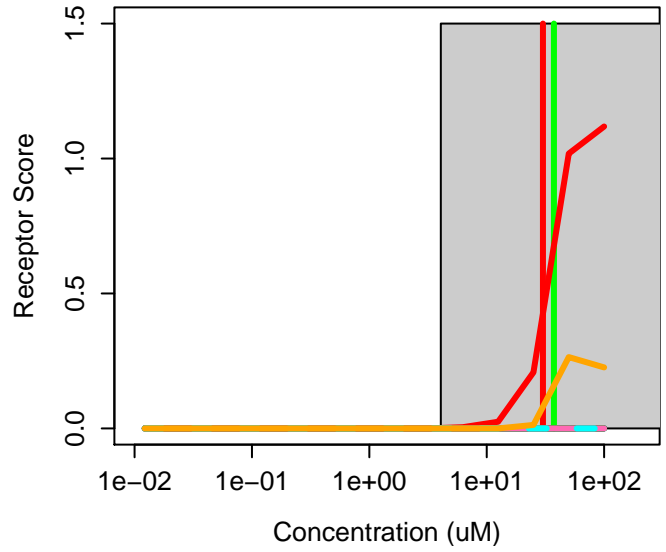

97-59-6 : Allantoin

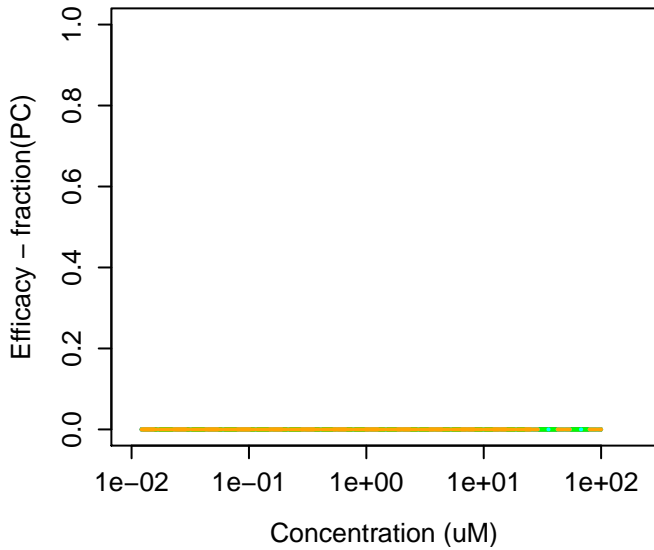

97-59-6 : Allantoin  
Agonist: 0 Antagonist: 0



97-77-8 : Disulfiram

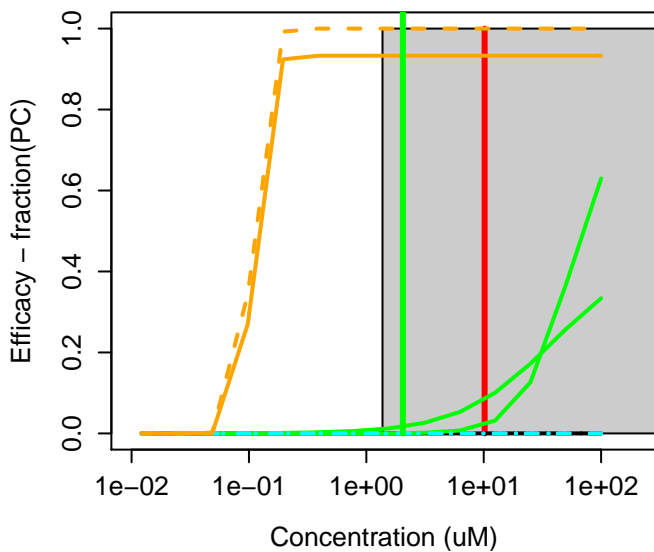

97-77-8 : Disulfiram  
Agonist: 0 Antagonist: 0.13

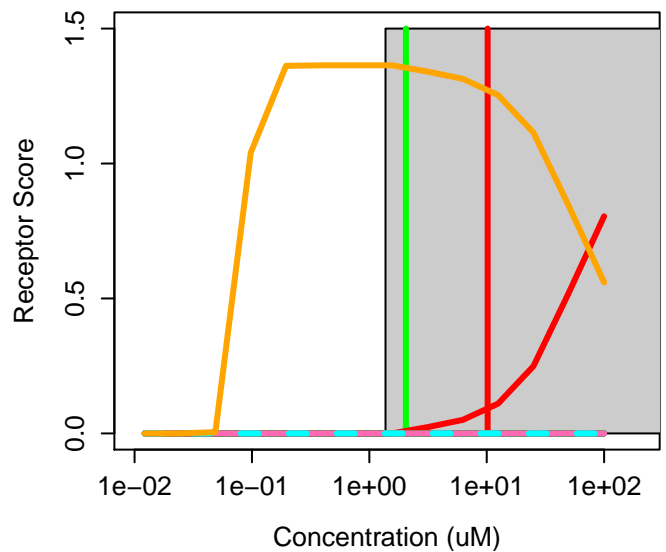

97-78-9 : N-Dodecanoyl-N-methylglycine

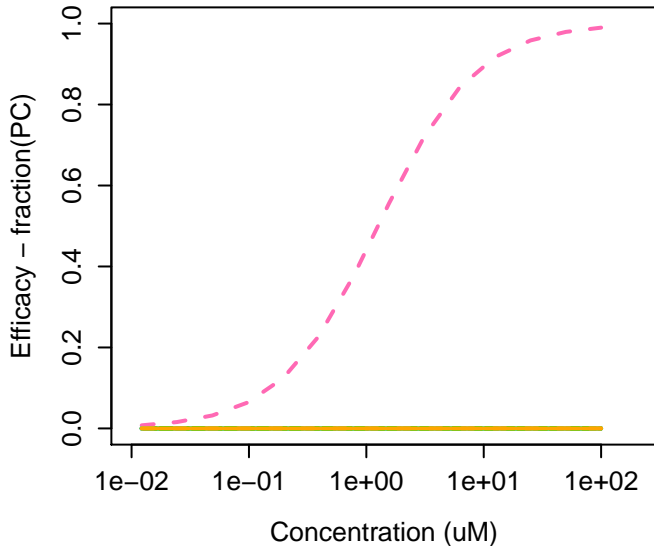

97-78-9 : N-Dodecanoyl-N-methylglycine  
Agonist: 0 Antagonist: 0

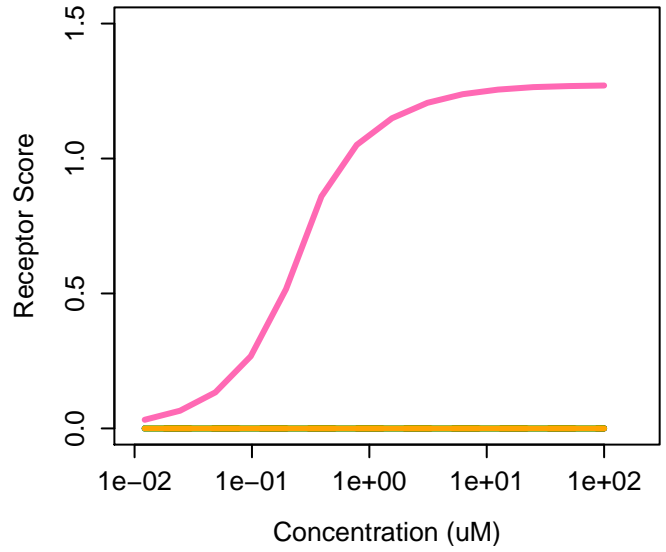

97886-45-8 : Dithiopyr

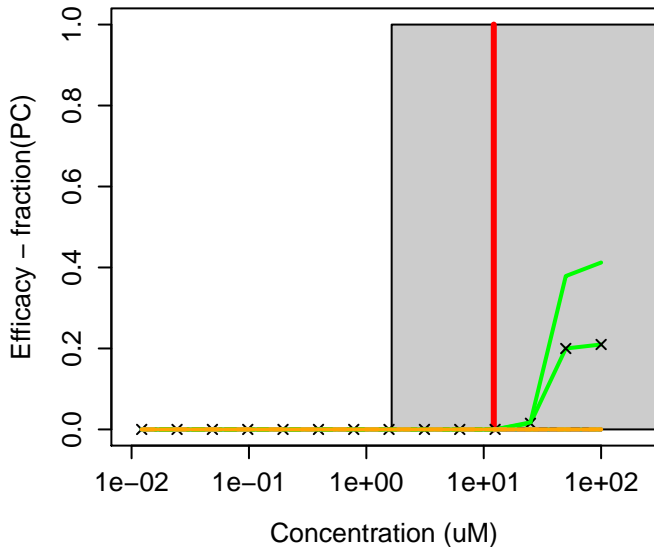

97886-45-8 : Dithiopyr  
Agonist: 0 Antagonist: 0

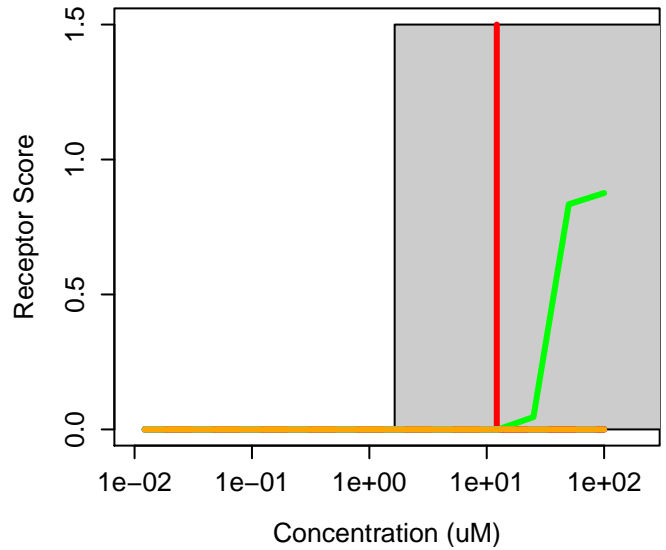

97-99-4 : Tetrahydrofurfuryl alcohol



97-99-4 : Tetrahydrofurfuryl alcohol  
Agonist: 0 Antagonist: 0



**98-00-0 : Furfuryl alcohol**

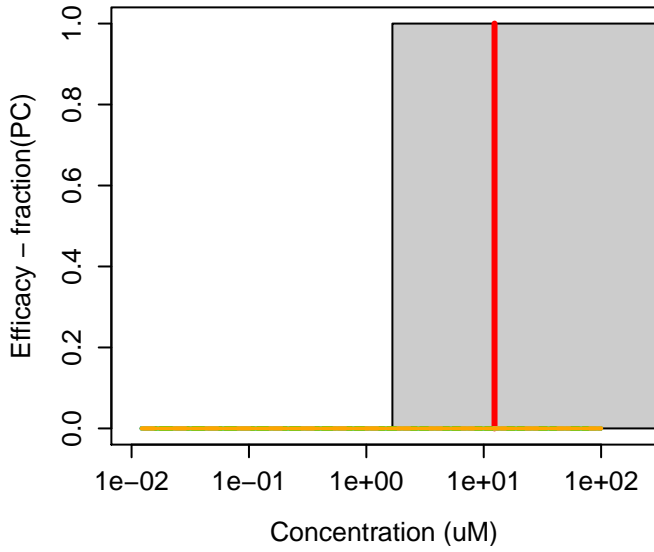

**98-00-0 : Furfuryl alcohol  
Agonist: 0 Antagonist: 0**

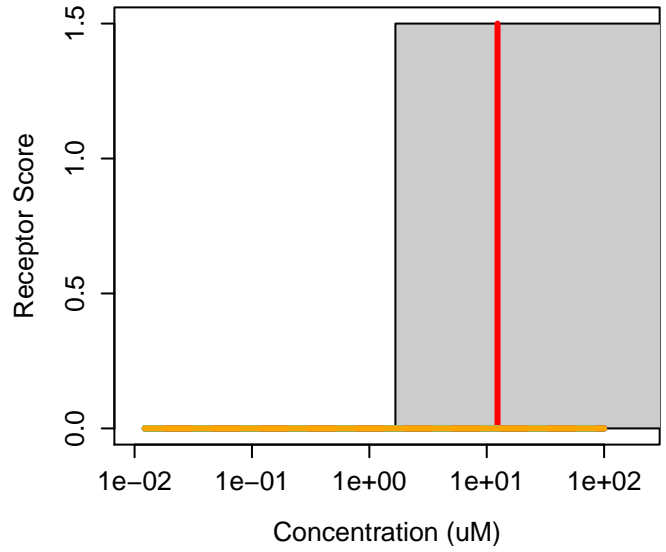

**98-01-1 : Furfural**



**98-01-1 : Furfural  
Agonist: 0 Antagonist: 0**



**98-06-6 : tert-Butylbenzene**



**98-06-6 : tert-Butylbenzene  
Agonist: 0 Antagonist: 0**





**98-07-7 : Benzotrichloride**



**98-07-7 : Benzotrichloride**  
**Agonist: 0 Antagonist: 0**



**98319-26-7 : Finasteride**

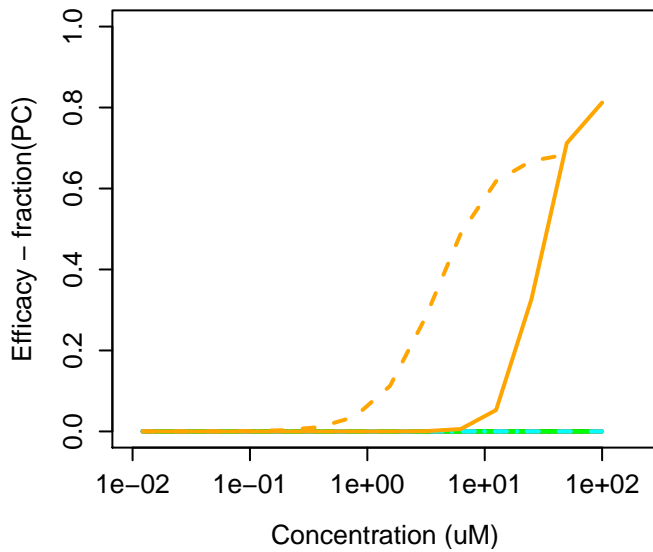

**98319-26-7 : Finasteride**  
**Agonist: 0 Antagonist: 0**

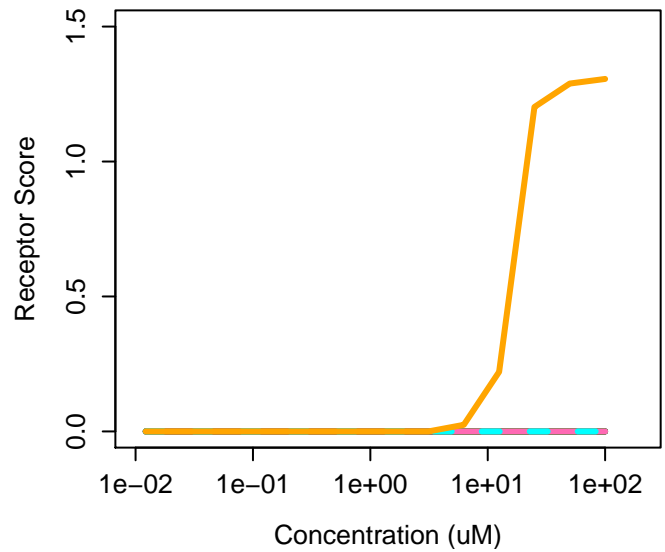

**98-51-1 : 4-tert-Butyltoluene**

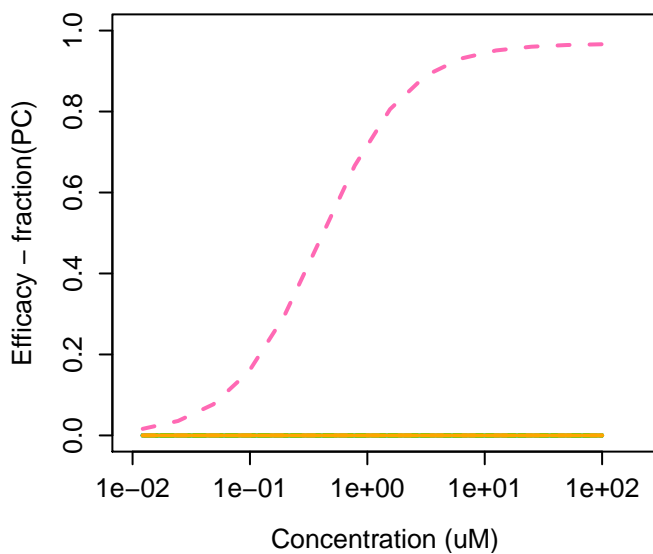

**98-51-1 : 4-tert-Butyltoluene**  
**Agonist: 7.6e-05 Antagonist: 0**

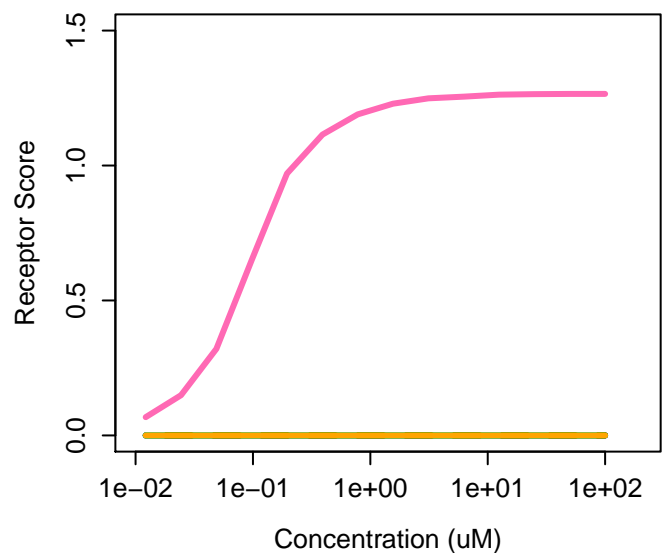

**98-52-2 : 4-tert-Butylcyclohexanol**



**98-52-2 : 4-tert-Butylcyclohexanol  
Agonist: 0 Antagonist: 0**



**98-53-3 : 4-tert-Butylcyclohexanone**



**98-53-3 : 4-tert-Butylcyclohexanone  
Agonist: 0 Antagonist: 0**

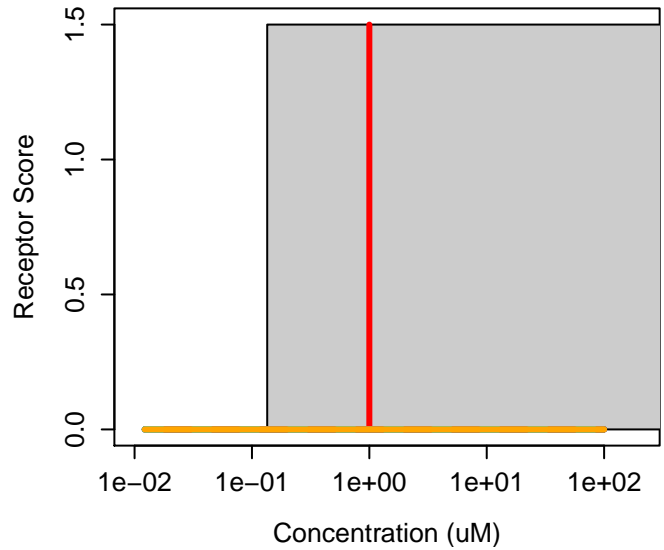

**98-54-4 : 4-tert-Butylphenol**



**98-54-4 : 4-tert-Butylphenol  
Agonist: 0 Antagonist: 0**



98-56-6 : 1-Chloro-4-(trifluoromethyl)benzene

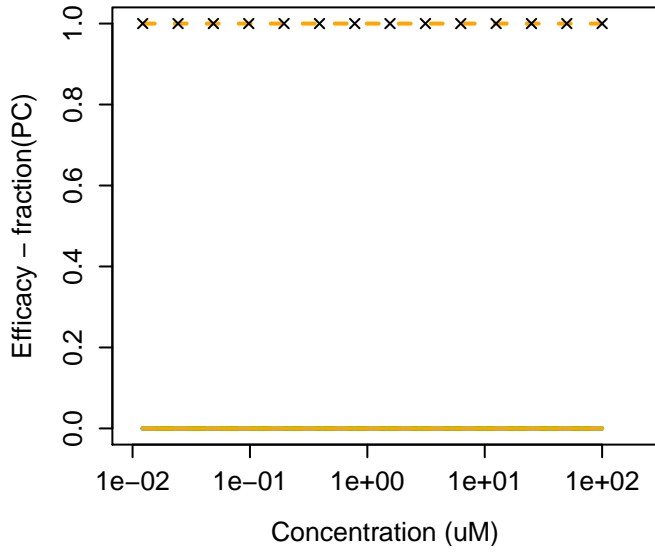

98-56-6 : 1-Chloro-4-(trifluoromethyl)benzene  
Agonist: 0 Antagonist: 0



98730-04-2 : Benoxacor

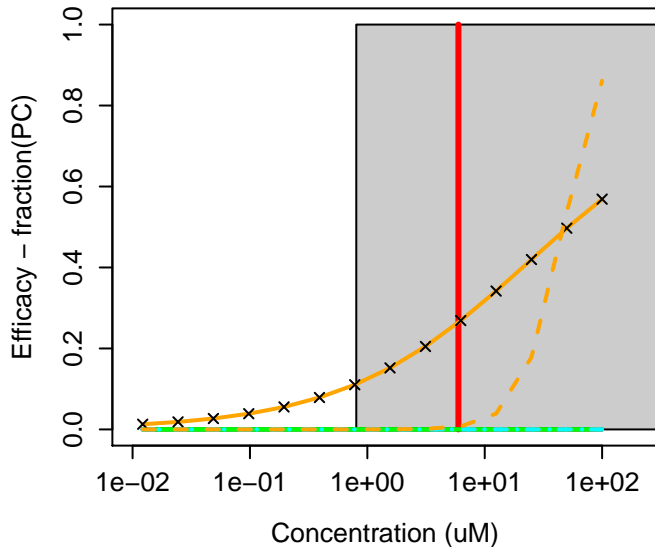

98730-04-2 : Benoxacor  
Agonist: 0 Antagonist: 0

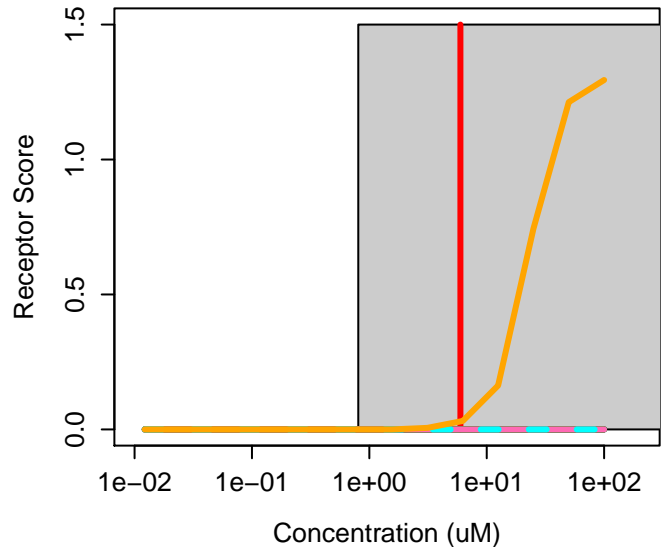

98-86-2 : Acetophenone



98-86-2 : Acetophenone  
Agonist: 0 Antagonist: 0



**98-87-3 : Benzal chloride**



**98-87-3 : Benzal chloride  
Agonist: 0 Antagonist: 0**



**98886-44-3 : Fosthiazate**



**98886-44-3 : Fosthiazate  
Agonist: 0 Antagonist: 0**



**98-92-0 : Niacinamide**

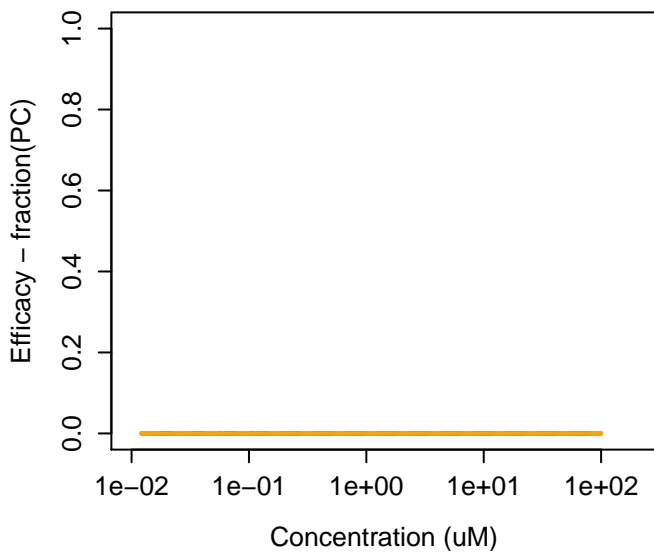

**98-92-0 : Niacinamide  
Agonist: 0 Antagonist: 0**



989-38-8 : Rhodamine 6G

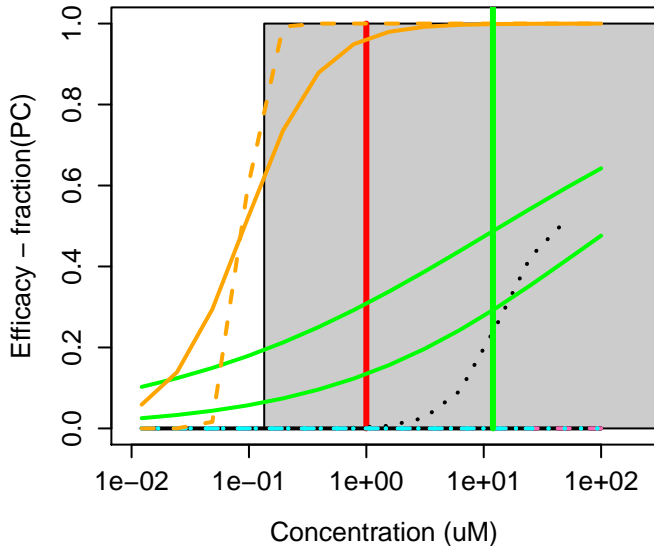

989-38-8 : Rhodamine 6G  
Agonist: 0 Antagonist: 0.53

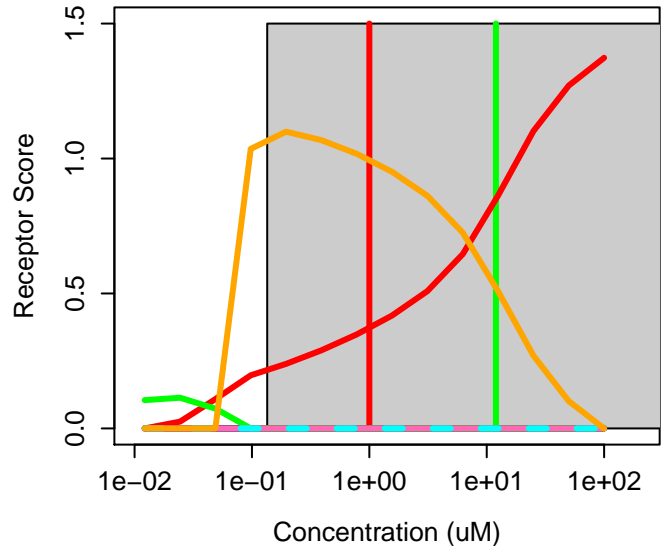

98-95-3 : Nitrobenzene



98-95-3 : Nitrobenzene  
Agonist: 0 Antagonist: 0



98967-40-9 : Flumetsulam

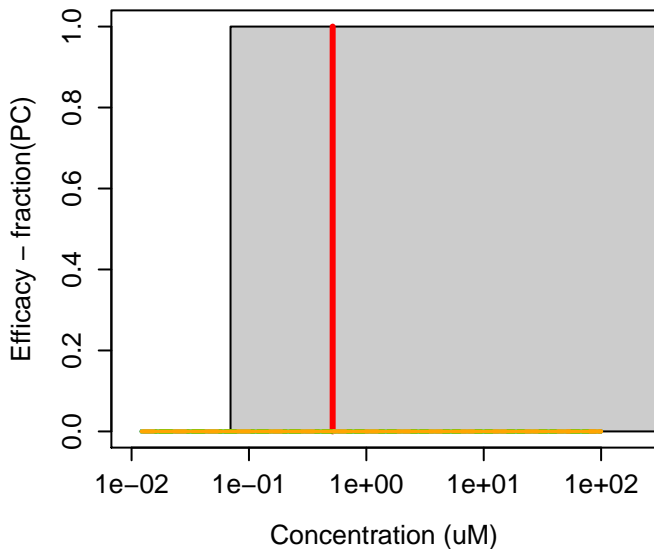

98967-40-9 : Flumetsulam  
Agonist: 0 Antagonist: 0

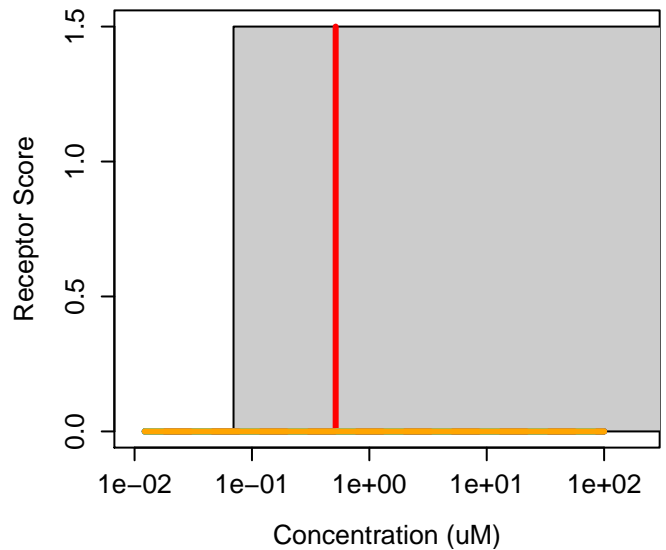

99-07-0 : 3-Dimethylaminophenol

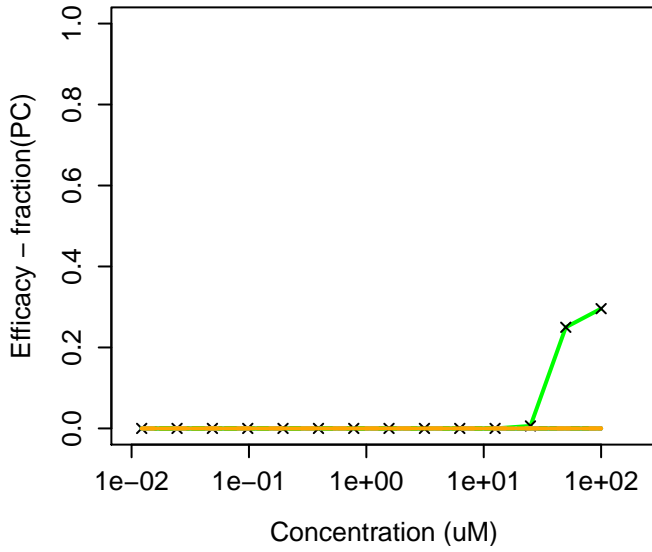

99-07-0 : 3-Dimethylaminophenol  
Agonist: 0 Antagonist: 0



99-08-1 : 3-Nitrotoluene



99-08-1 : 3-Nitrotoluene  
Agonist: 0 Antagonist: 0



99-30-9 : Dicloran

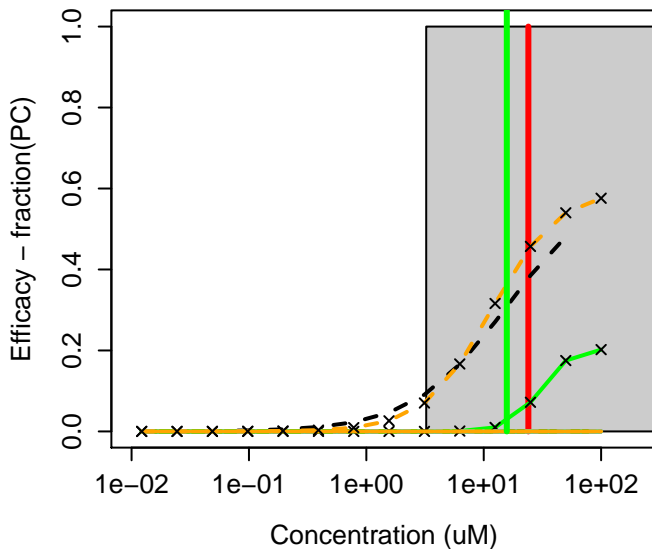

99-30-9 : Dicloran  
Agonist: 0 Antagonist: 0.095

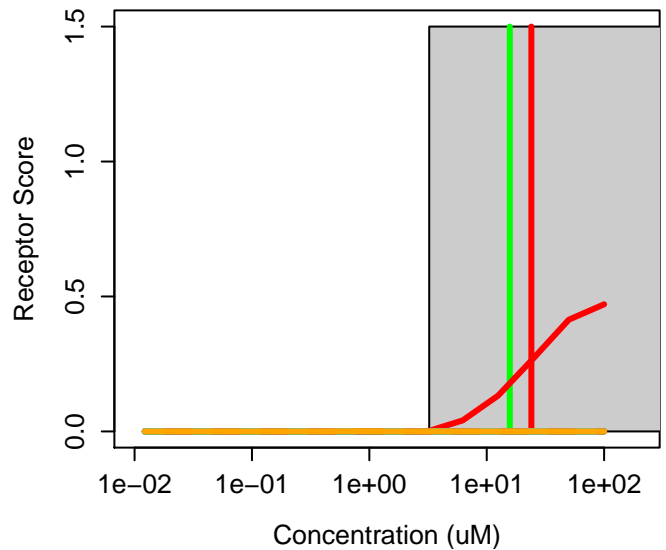

**99-51-4 : 1,2-Dimethyl-4-nitrobenzene**



**99-51-4 : 1,2-Dimethyl-4-nitrobenzene  
Agonist: 0 Antagonist: 0**



**99-54-7 : 3,4-Dichloronitrobenzene**



**99-54-7 : 3,4-Dichloronitrobenzene  
Agonist: 0 Antagonist: 0**



**99-55-8 : 2-Methyl-5-nitroaniline**

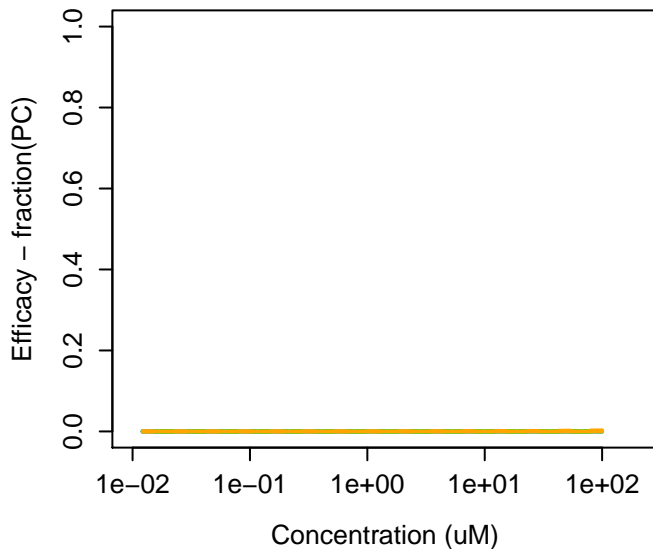

**99-55-8 : 2-Methyl-5-nitroaniline  
Agonist: 0 Antagonist: 0**



99-59-2 : 2-Methoxy-5-nitroaniline



99-59-2 : 2-Methoxy-5-nitroaniline  
Agonist: 0 Antagonist: 0



99607-70-2 : Cloquintocet-mexyl

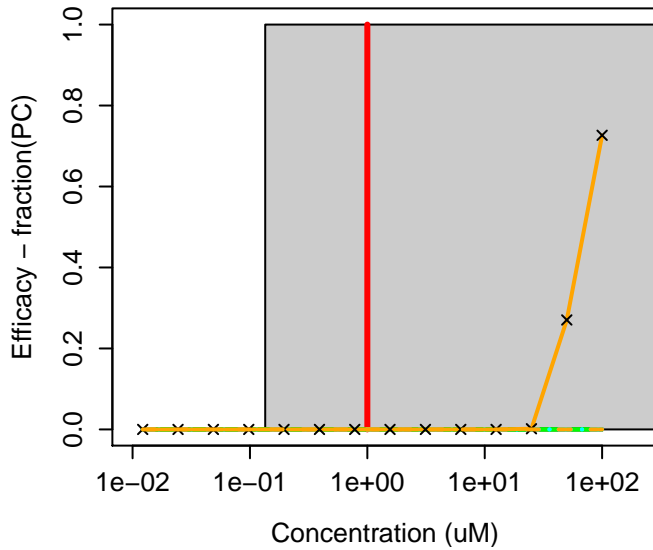

99607-70-2 : Cloquintocet-mexyl  
Agonist: 0 Antagonist: 0

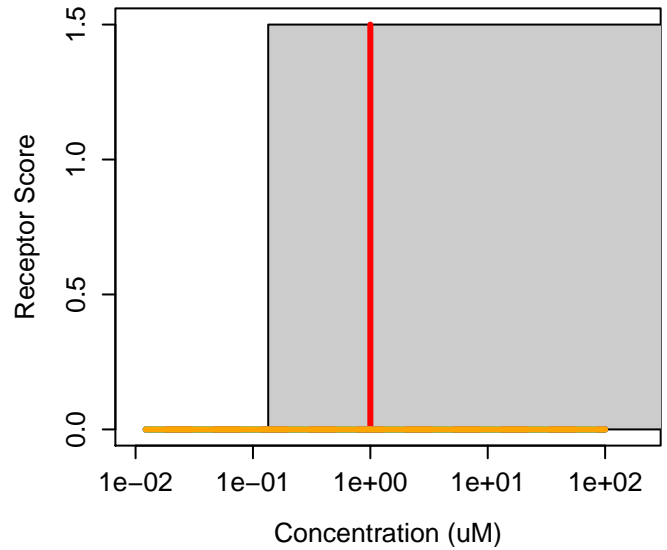

99-62-7 : 1,3-Diisopropylbenzene



99-62-7 : 1,3-Diisopropylbenzene  
Agonist: 0 Antagonist: 0





99-63-8 : 1,3-Benzenedicarbonyl dichloride



99-63-8 : 1,3-Benzenedicarbonyl dichloride  
Agonist: 0 Antagonist: 0



99-65-0 : 1,3-Dinitrobenzene



99-65-0 : 1,3-Dinitrobenzene  
Agonist: 0 Antagonist: 0



99-66-1 : Valproic acid

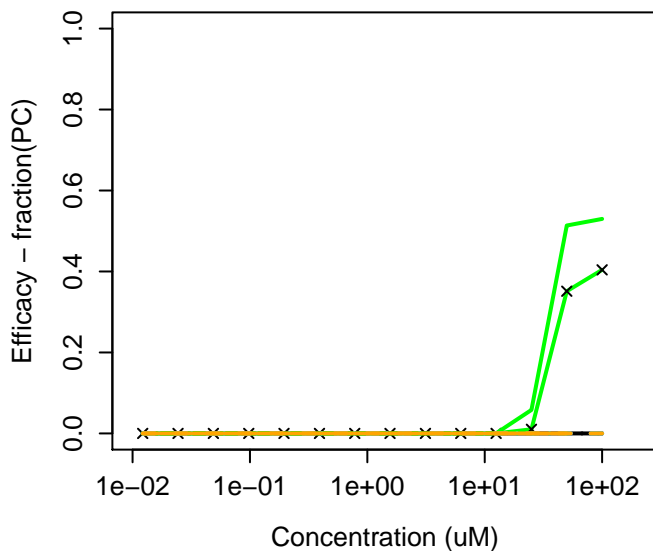

99-66-1 : Valproic acid  
Agonist: 0 Antagonist: 0

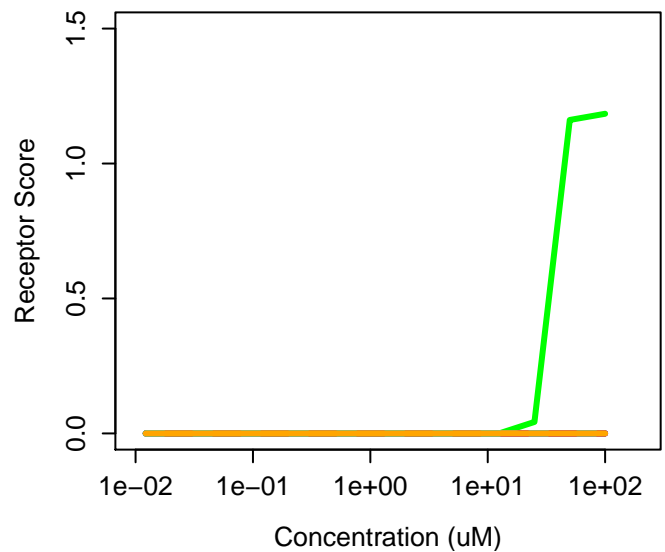

**99-71-8 : 4-(Butan-2-yl)phenol**



**99-71-8 : 4-(Butan-2-yl)phenol  
Agonist: 0 Antagonist: 0**



**99-76-3 : Methylparaben**



**99-76-3 : Methylparaben  
Agonist: 0 Antagonist: 0**



**99-85-4 : gamma-Terpinene**



**99-85-4 : gamma-Terpinene  
Agonist: 0 Antagonist: 0**



**99-86-5 : alpha-Terpinene**



**99-86-5 : alpha-Terpinene  
Agonist: 0 Antagonist: 0**



**99-87-6 : p-Cymene**



**99-87-6 : p-Cymene  
Agonist: 0 Antagonist: 0**



**99-89-8 : 4-Isopropylphenol**



**99-89-8 : 4-Isopropylphenol  
Agonist: 0 Antagonist: 0**



**99-93-4 : 4-Hydroxyacetophenone**



**99-93-4 : 4-Hydroxyacetophenone  
Agonist: 0 Antagonist: 0**



**99-96-7 : 4-Hydroxybenzoic acid**



**99-96-7 : 4-Hydroxybenzoic acid  
Agonist: 0 Antagonist: 0**



**99-97-8 : N,N,4-Trimethylaniline**



**99-97-8 : N,N,4-Trimethylaniline  
Agonist: 0 Antagonist: 0**



99-99-0 : 4-Nitrotoluene



99-99-0 : 4-Nitrotoluene  
Agonist: 0 Antagonist: 0



999-97-3 : Hexamethyldisilazane



999-97-3 : Hexamethyldisilazane  
Agonist: 0 Antagonist: 0



742 : Milbemectin (mixture of 70% Milbemcin A4, 30% Milbemectin (mixture of 70% Milbemcin A4, 30%  
Agonist: 0.0036 Antagonist: 0.27

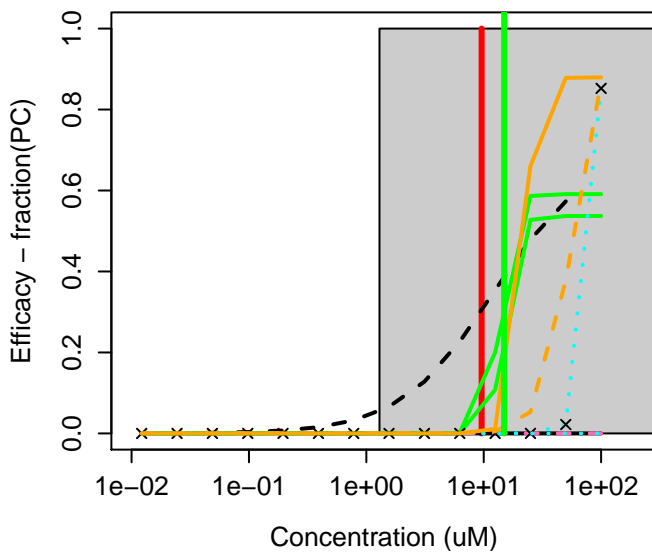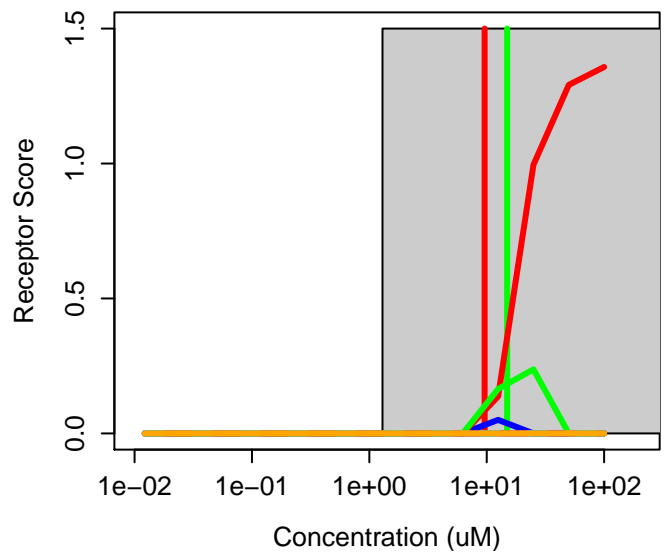

**NOCAS\_47248 : CI-1018**

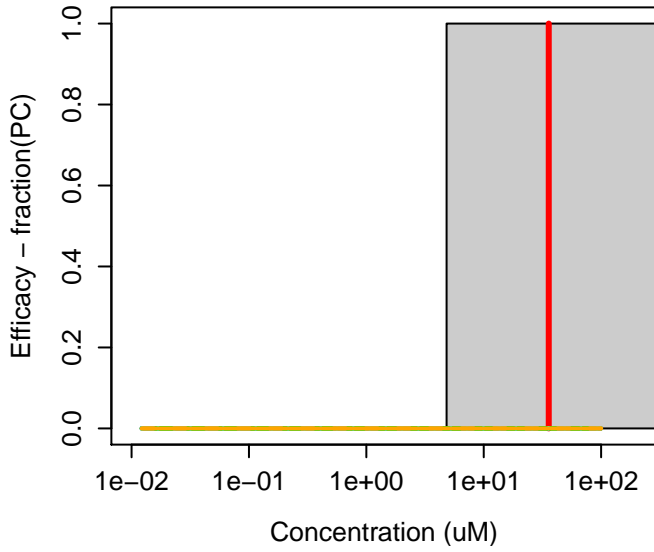

**NOCAS\_47248 : CI-1018**  
**Agonist: 0 Antagonist: 0**

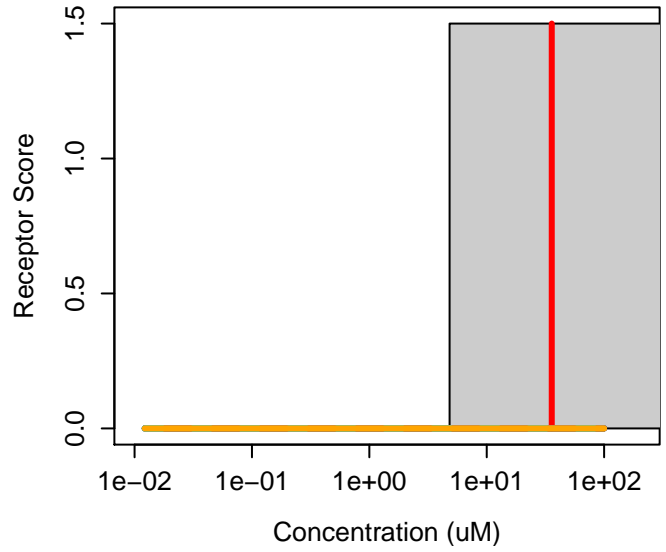

**NOCAS\_47255 : CP-465394**

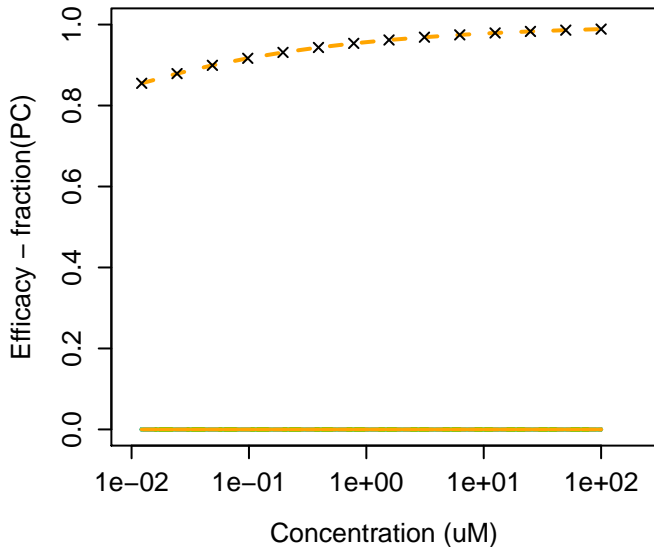

**NOCAS\_47255 : CP-465394**  
**Agonist: 0 Antagonist: 0**

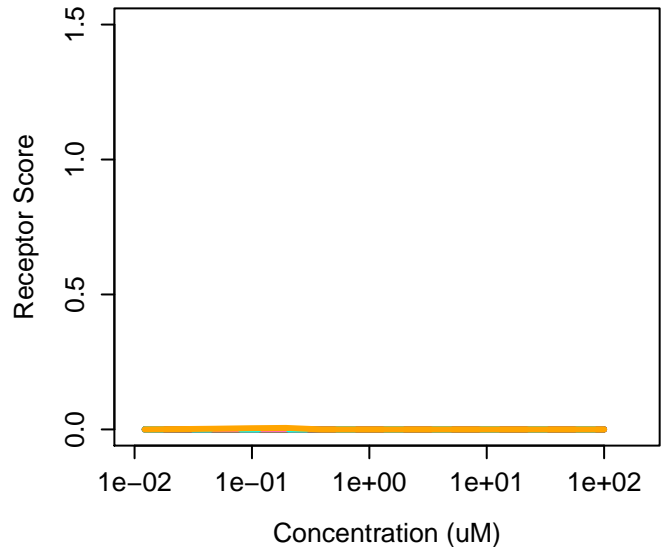

**NOCAS\_47265 : CP-471358**



**NOCAS\_47265 : CP-471358**  
**Agonist: 0 Antagonist: 0**



**NOCAS\_47267 : CP-642931**

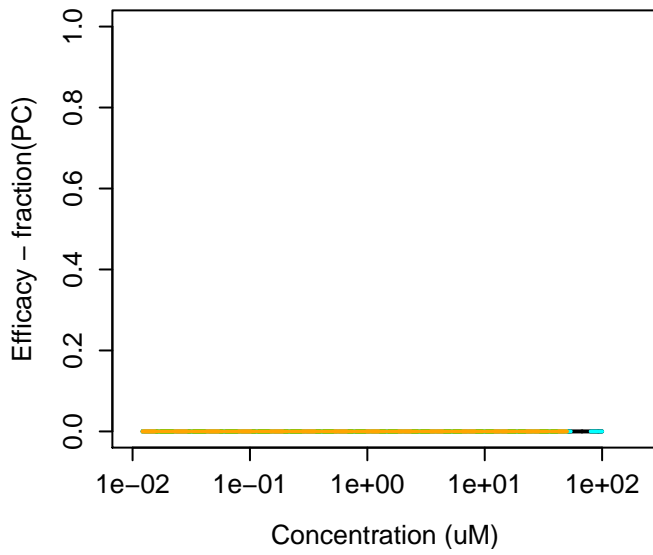

**NOCAS\_47267 : CP-642931**  
**Agonist: 0 Antagonist: 0**



**NOCAS\_47291 : CI-1044**



**NOCAS\_47291 : CI-1044**  
**Agonist: 0 Antagonist: 0**



**NOCAS\_47292 : PD 0200347**

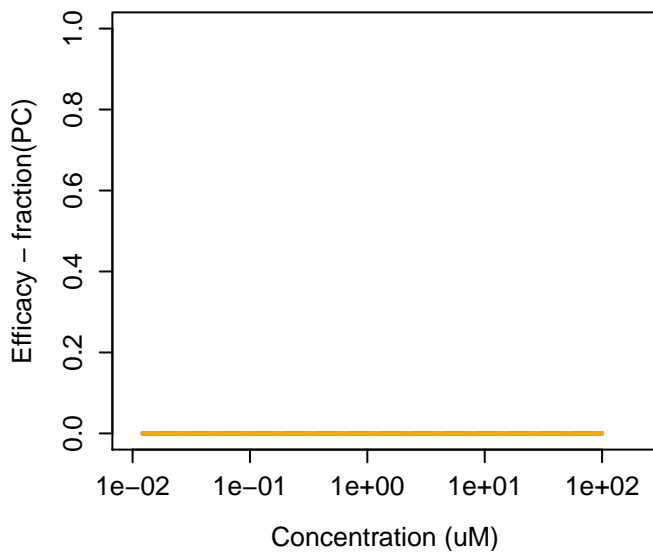

**NOCAS\_47292 : PD 0200347**  
**Agonist: 0 Antagonist: 0**



**NOCAS\_47299 : CP-422935**



**NOCAS\_47299 : CP-422935**  
**Agonist: 0 Antagonist: 0**



**NOCAS\_47305 : CP-608039**



**NOCAS\_47305 : CP-608039**  
**Agonist: 0 Antagonist: 0**



**NOCAS\_47311 : GSK163929B**

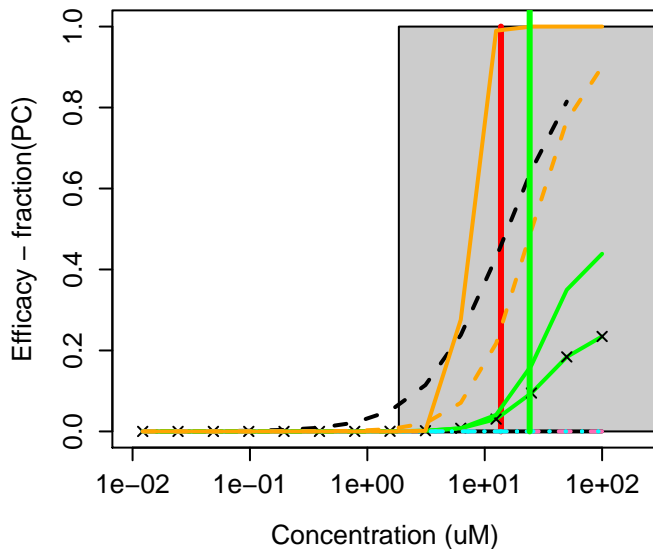

**NOCAS\_47311 : GSK163929B**  
**Agonist: 0 Antagonist: 0.27**

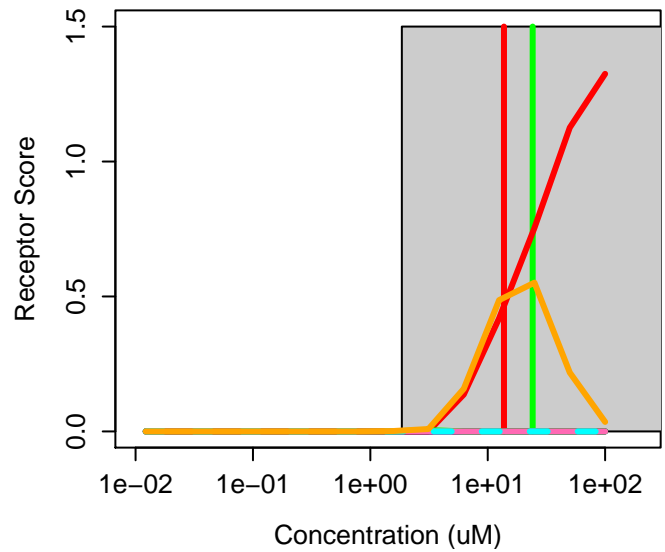



**NOCAS\_47325 : SB413217A**

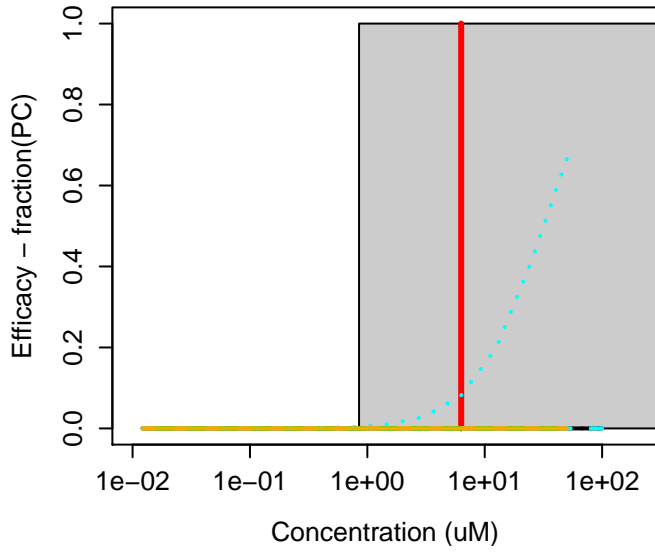

**NOCAS\_47325 : SB413217A**  
**Agonist: 0 Antagonist: 0**

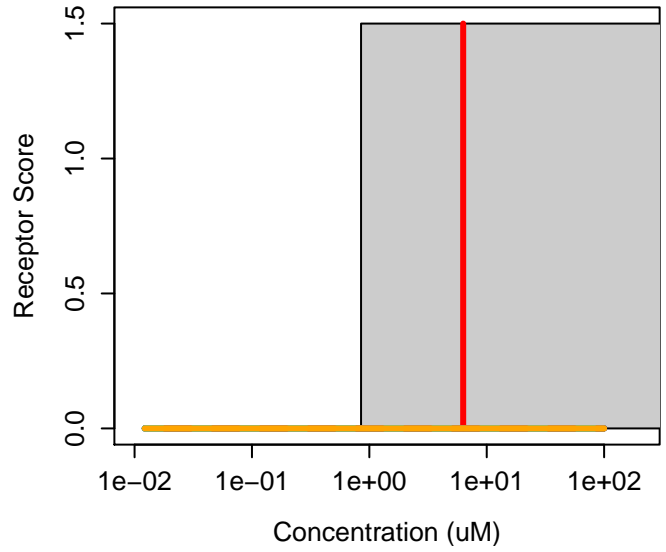

**NOCAS\_47328 : MK-274**

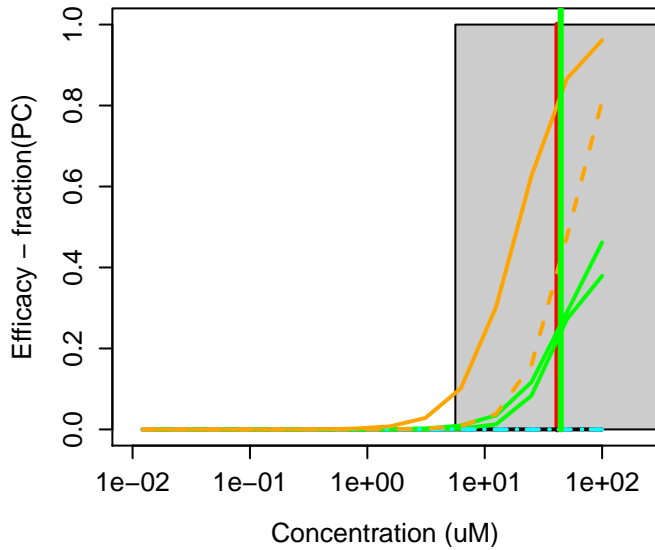

**NOCAS\_47328 : MK-274**  
**Agonist: 0 Antagonist: 0.098**

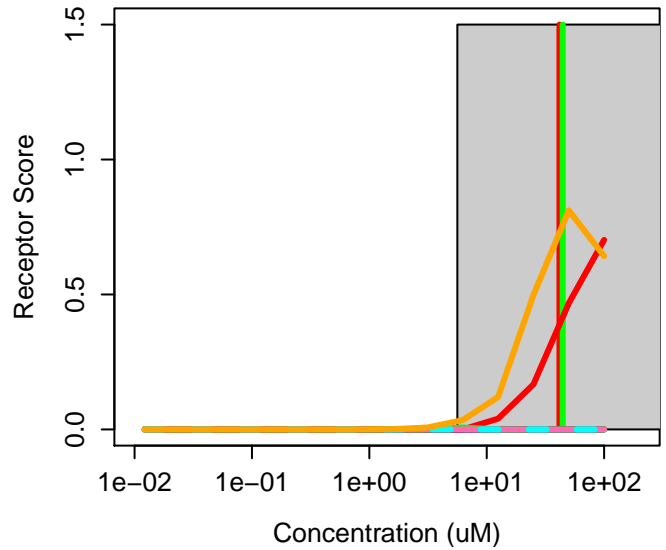

**NOCAS\_47330 : PharmaGSID\_47330**

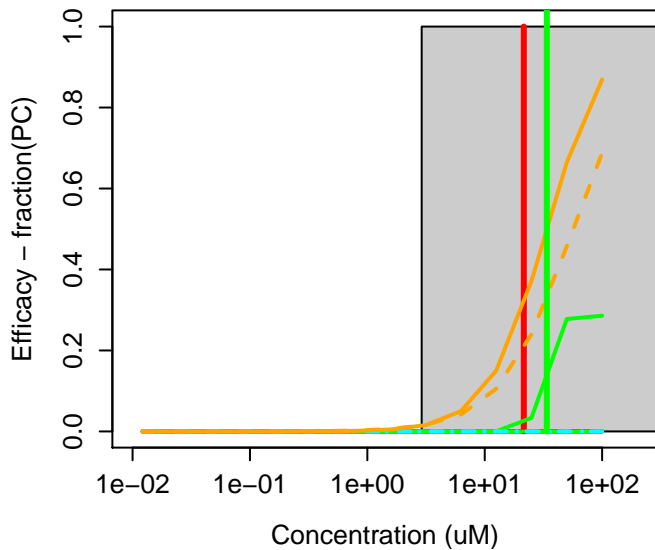

**NOCAS\_47330 : PharmaGSID\_47330**  
**Agonist: 0 Antagonist: 0.036**

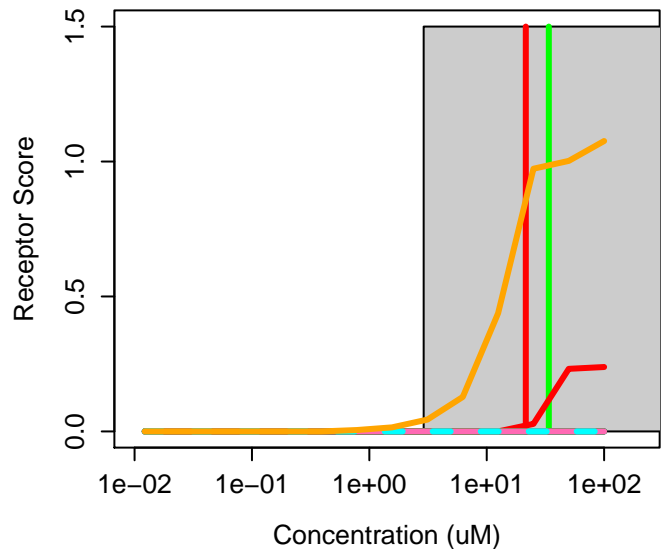

**NOCAS\_47333 : PharmaGSID\_47333**

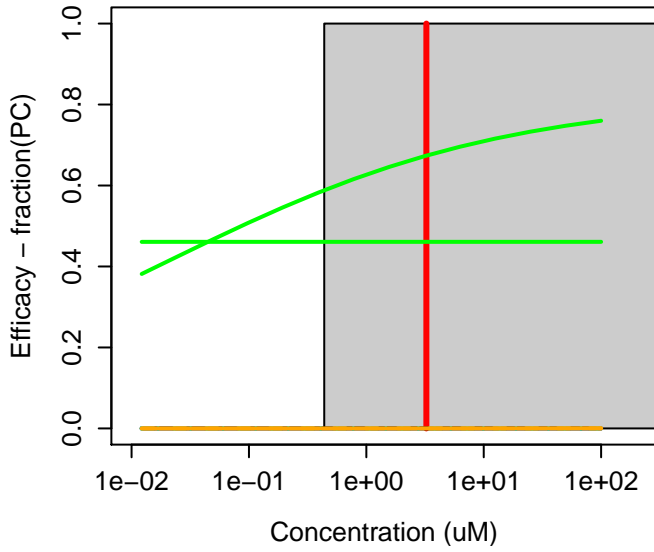

**NOCAS\_47333 : PharmaGSID\_47333**

**Agonist: 0 Antagonist: 0.00072**

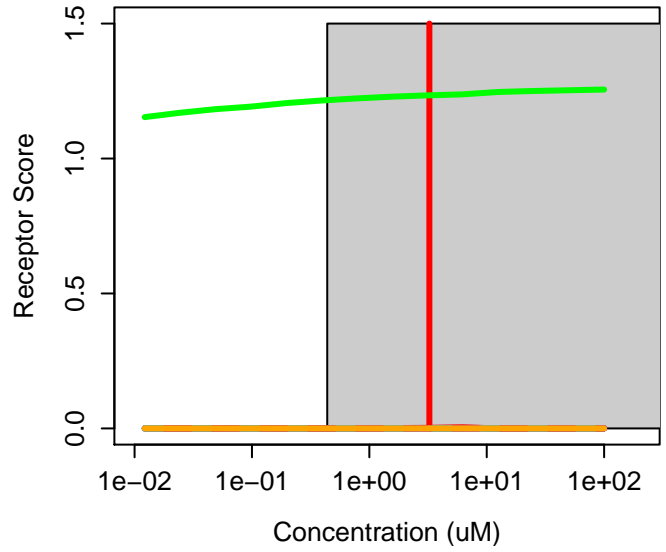

**NOCAS\_47334 : MK-968**

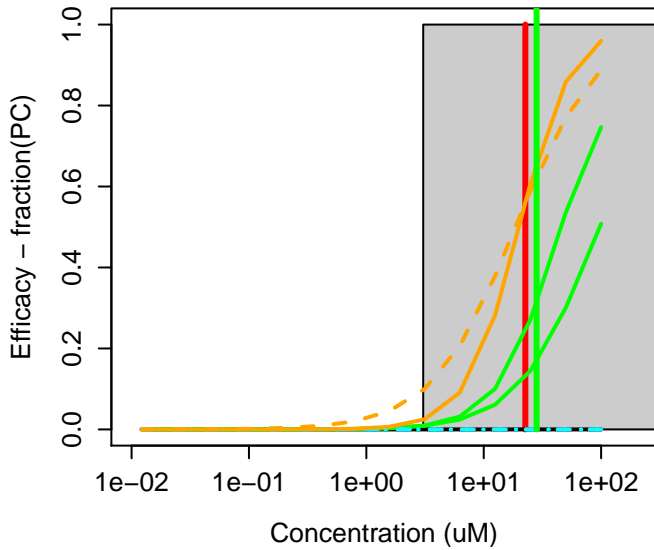

**NOCAS\_47334 : MK-968**

**Agonist: 0 Antagonist: 0.16**

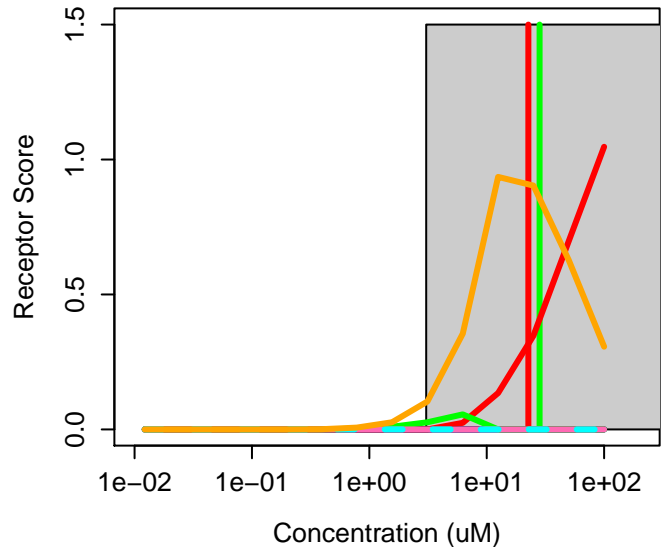

**NOCAS\_47342 : SR125047**

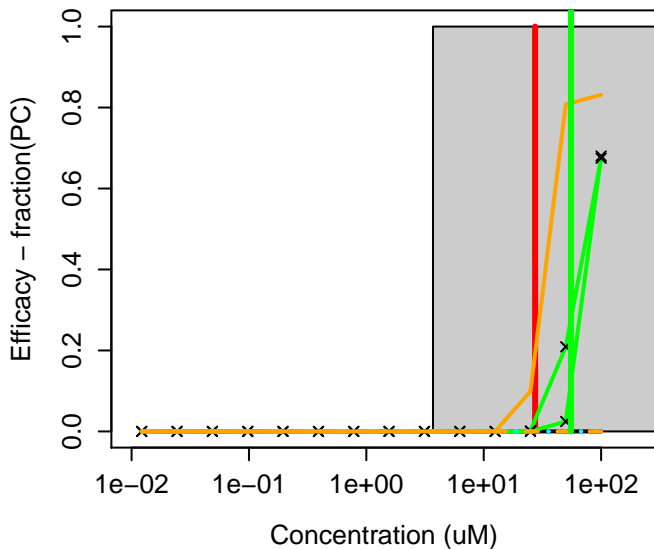

**NOCAS\_47342 : SR125047**

**Agonist: 0 Antagonist: 0.061**

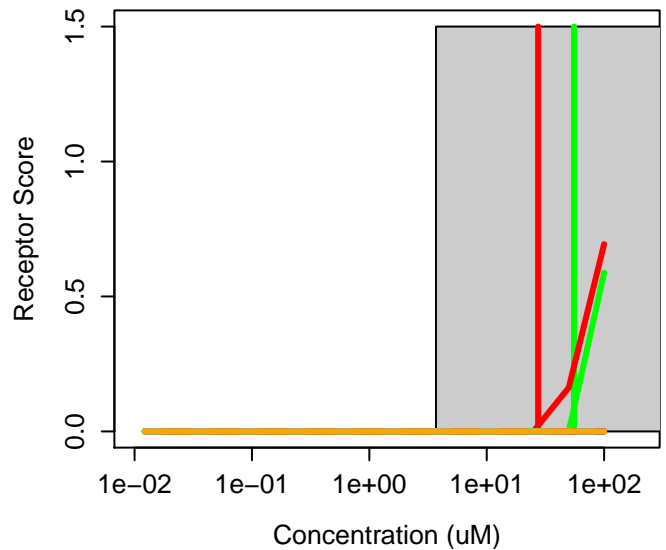

**NOCAS\_47346 : SSR162369**

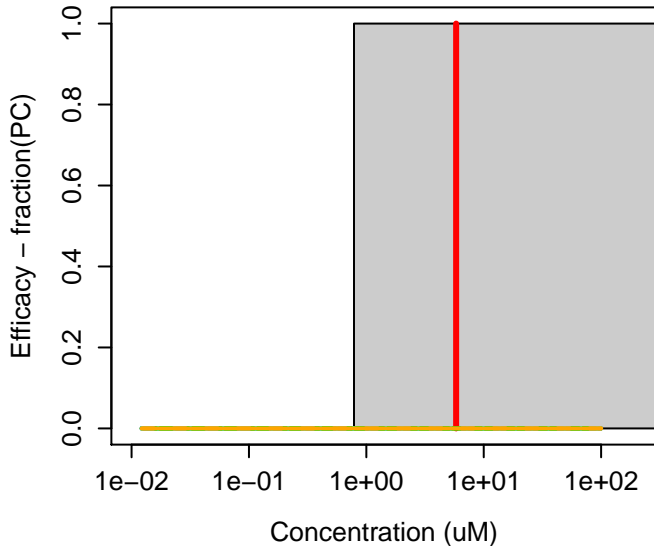

**NOCAS\_47346 : SSR162369**  
**Agonist: 0 Antagonist: 0**

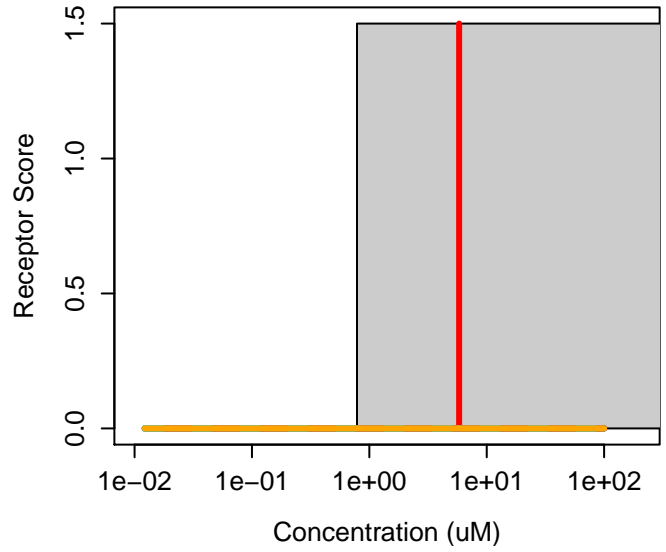

**464930-42-5 : SSR240612**

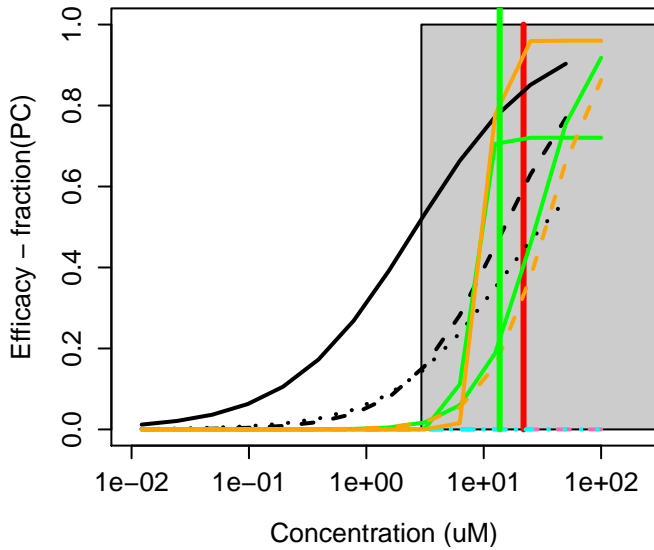

**464930-42-5 : SSR240612**  
**Agonist: 0.003 Antagonist: 0.43**

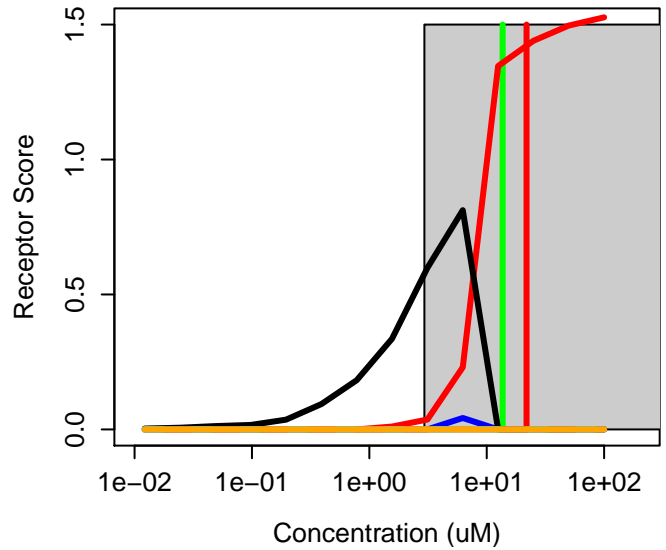

**NOCAS\_47353 : SSR241586**

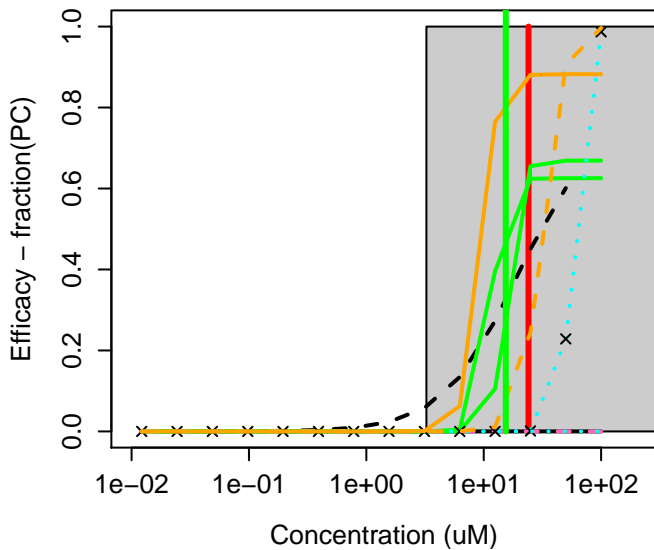

**NOCAS\_47353 : SSR241586**  
**Agonist: 0 Antagonist: 0.33**

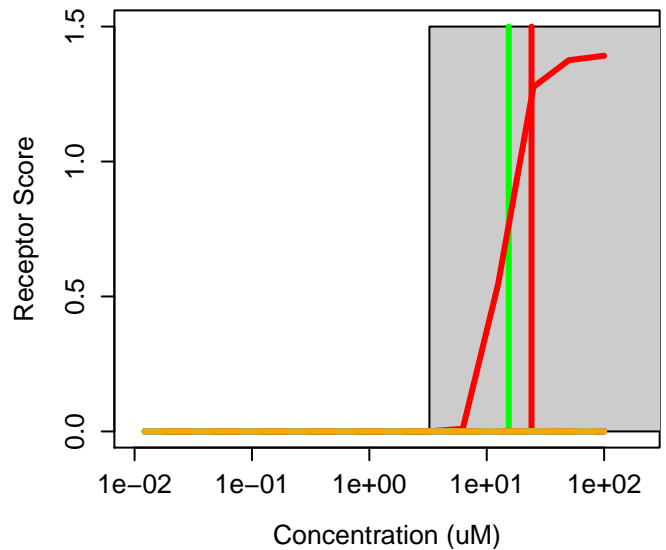

**NOCAS\_47362 : SSR150106**

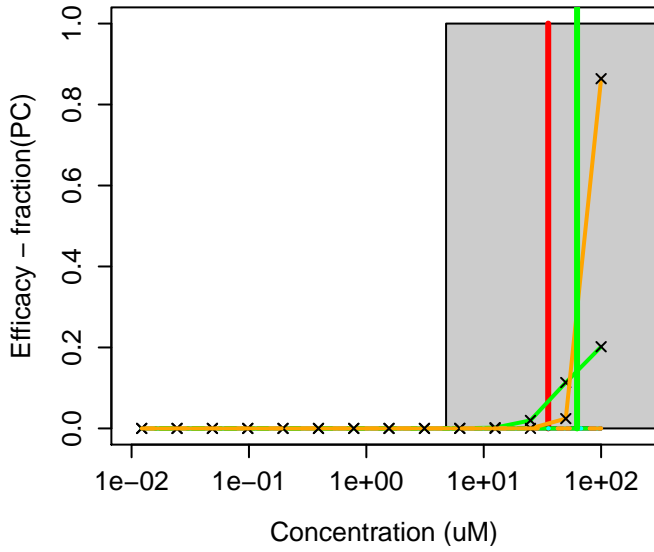

**NOCAS\_47362 : SSR150106**  
Agonist: 0 Antagonist: 0.01

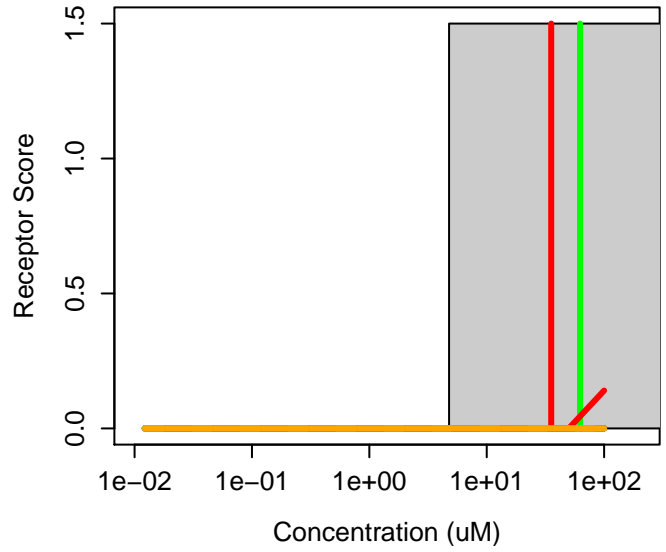

**1075752-90-7 : SSR103800**

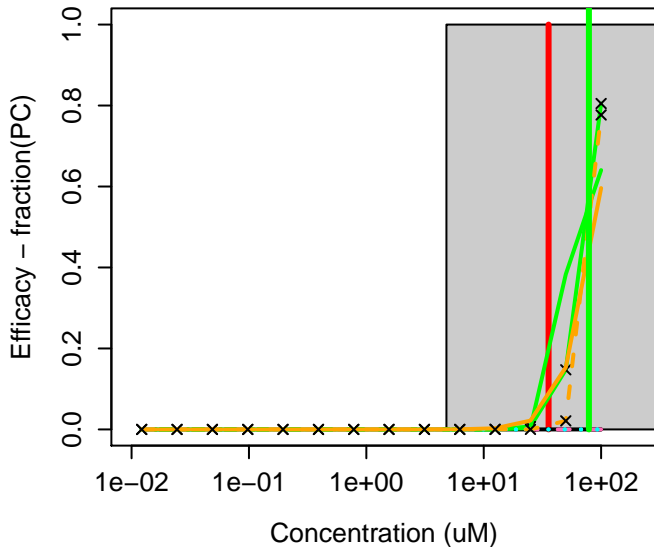

**1075752-90-7 : SSR103800**  
Agonist: 0 Antagonist: 0.092

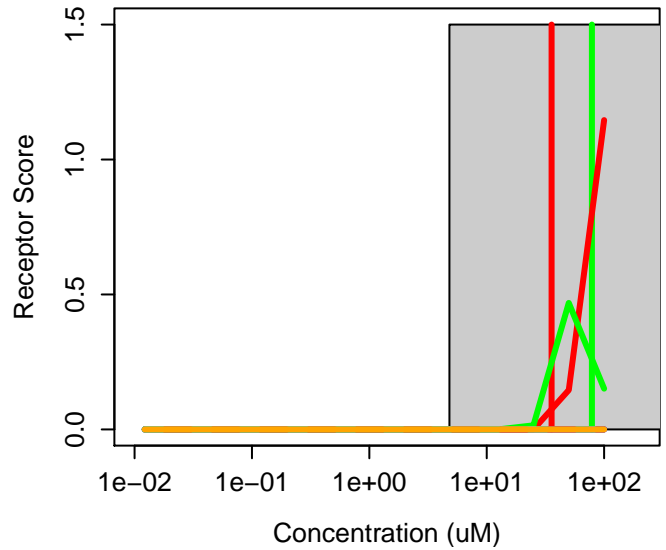

**NOCAS\_47366 : SAR115740**

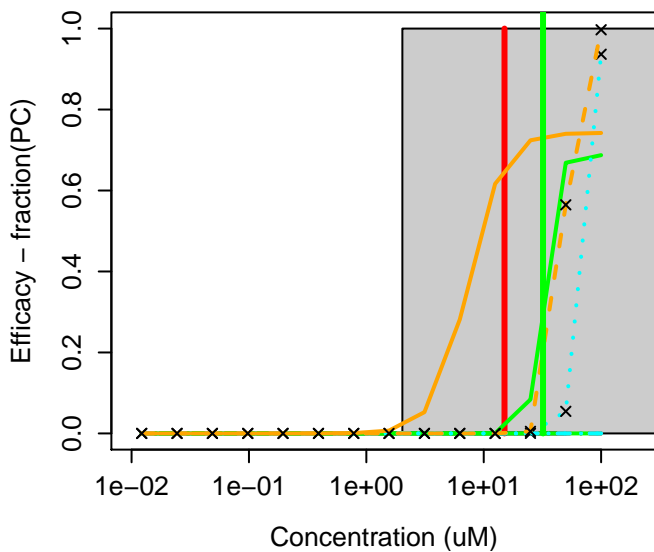

**NOCAS\_47366 : SAR115740**  
Agonist: 0 Antagonist: 0.085

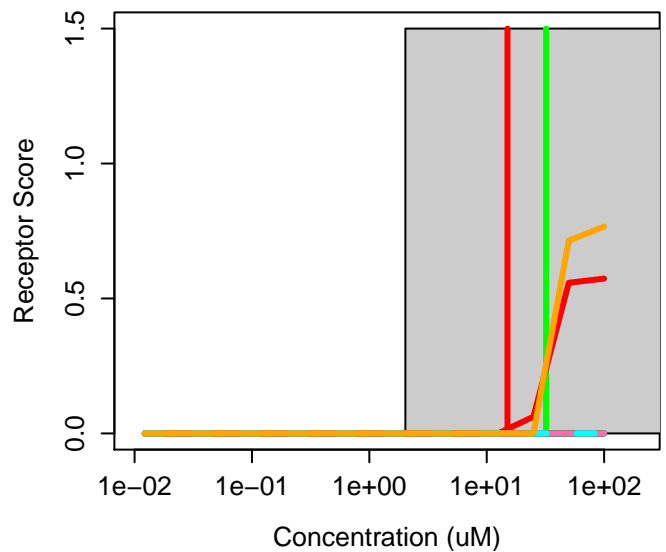

**NOCAS\_47374 : SSR161421**

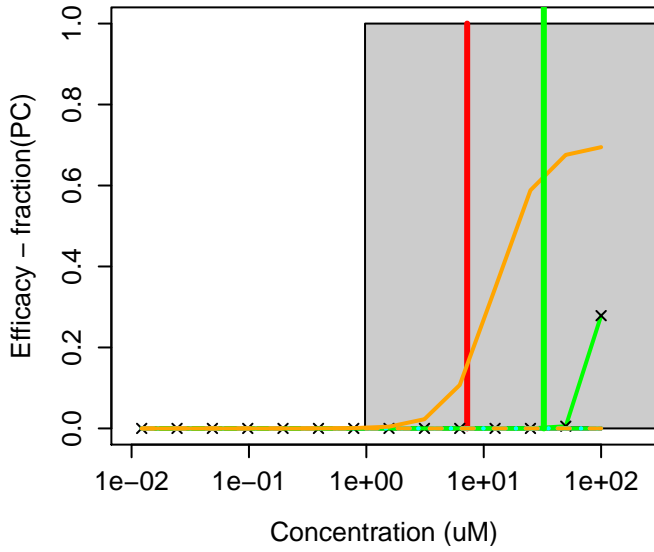

**NOCAS\_47374 : SSR161421**  
**Agonist: 0 Antagonist: 0.014**

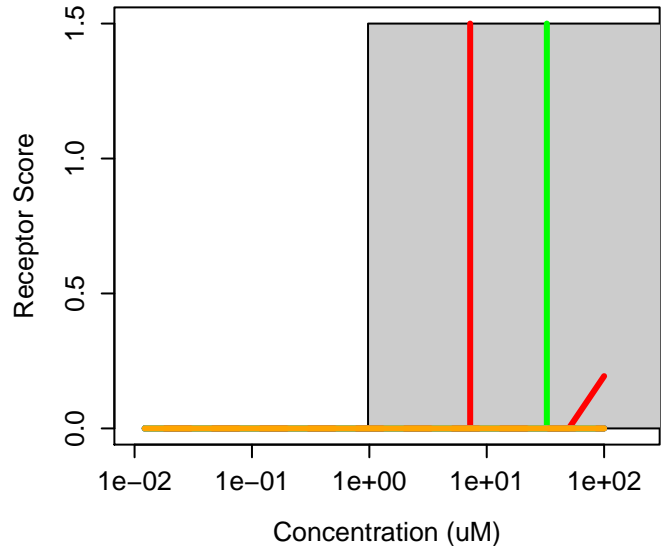

**NOCAS\_47377 : AVE6324**

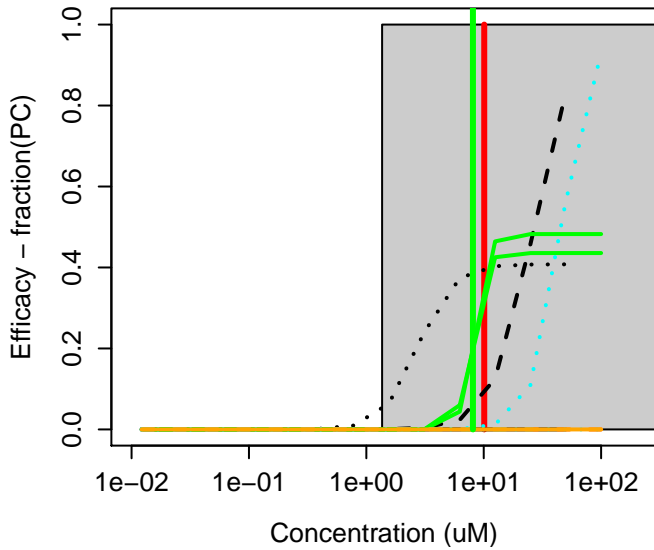

**NOCAS\_47377 : AVE6324**  
**Agonist: 0.17 Antagonist: 0.022**

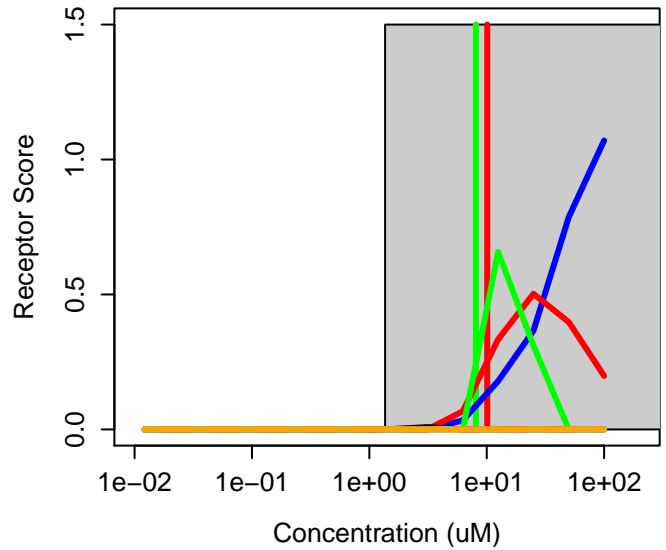

**NOCAS\_47379 : SSR126768**

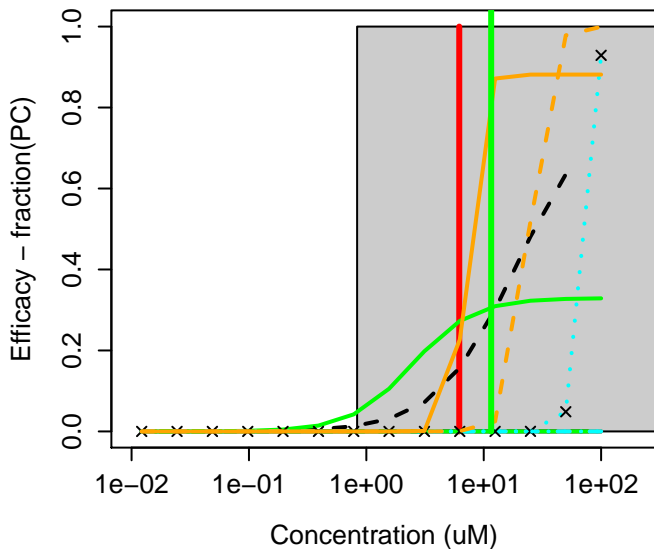

**NOCAS\_47379 : SSR126768**  
**Agonist: 0.00055 Antagonist: 0.22**

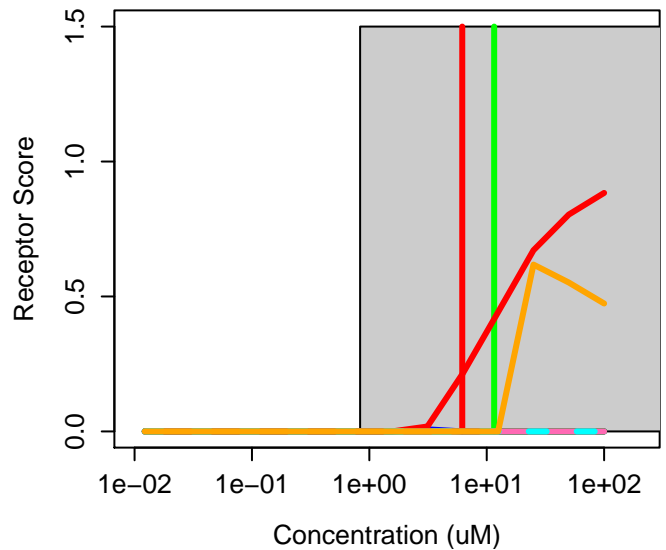

**NOCAS\_47383 : AVE3247**

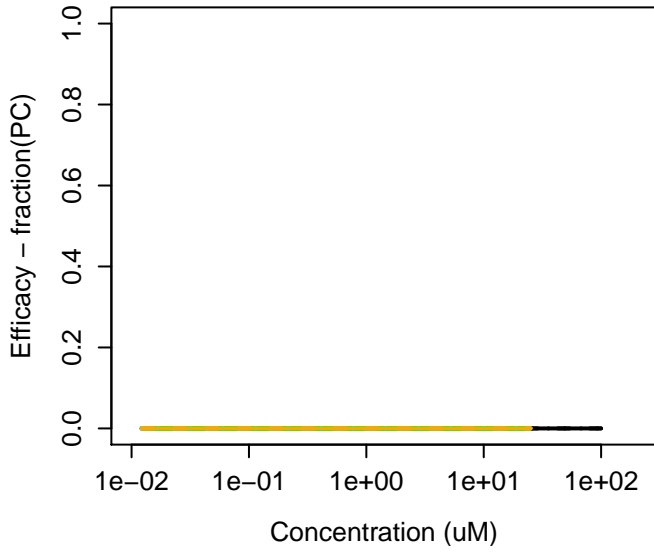

**NOCAS\_47383 : AVE3247**  
**Agonist: 0 Antagonist: 0**



**NOCAS\_47385 : SAR377142**

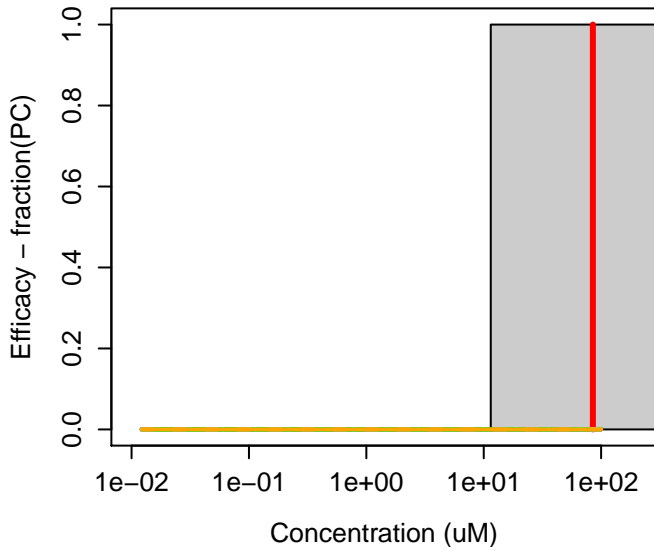

**NOCAS\_47385 : SAR377142**  
**Agonist: 0 Antagonist: 0**

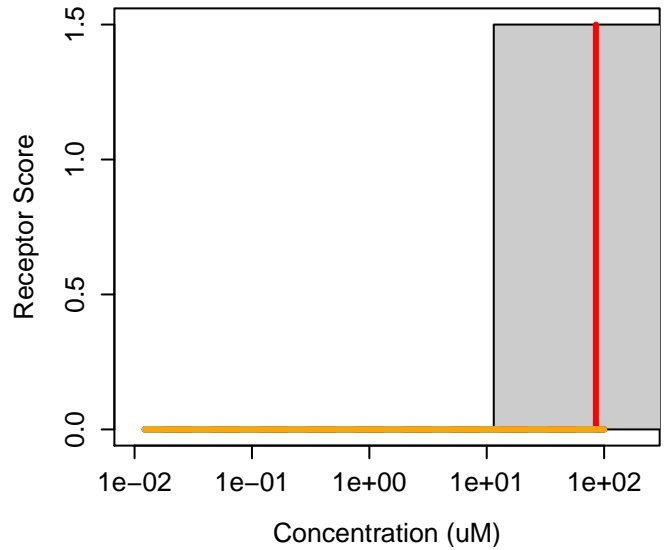

**NOCAS\_47387 : SAR102779**

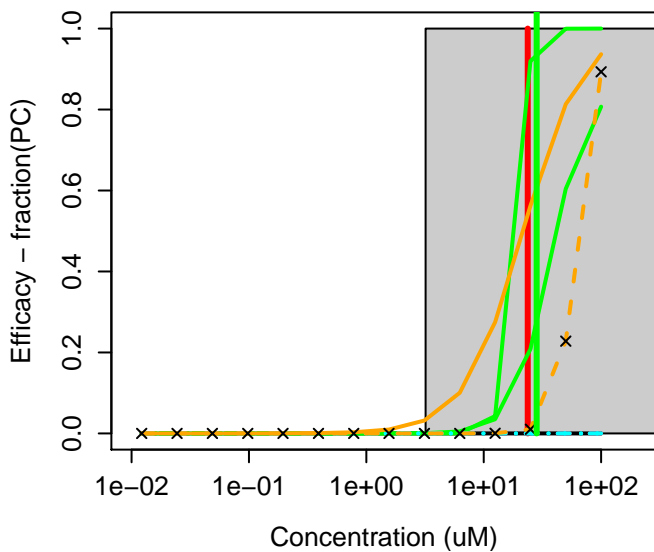

**NOCAS\_47387 : SAR102779**  
**Agonist: 0 Antagonist: 0.2**

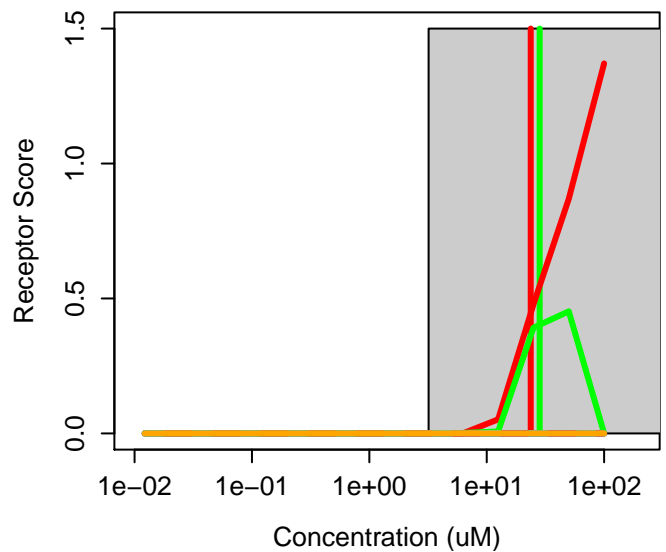

433212-21-6 : SAR150640

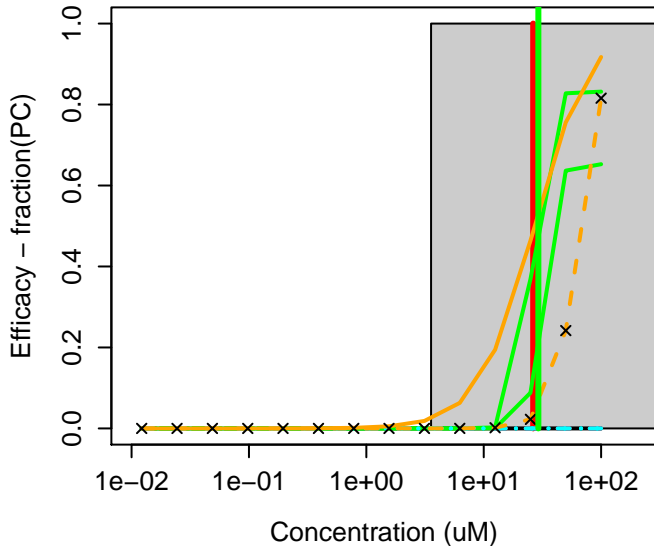

433212-21-6 : SAR150640  
Agonist: 0 Antagonist: 0.17

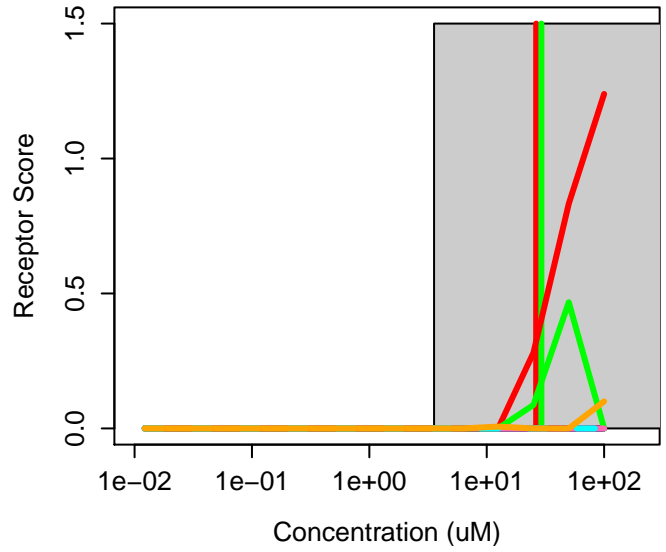

NOCAS\_47394 : Grinstad Soft-N-Safe

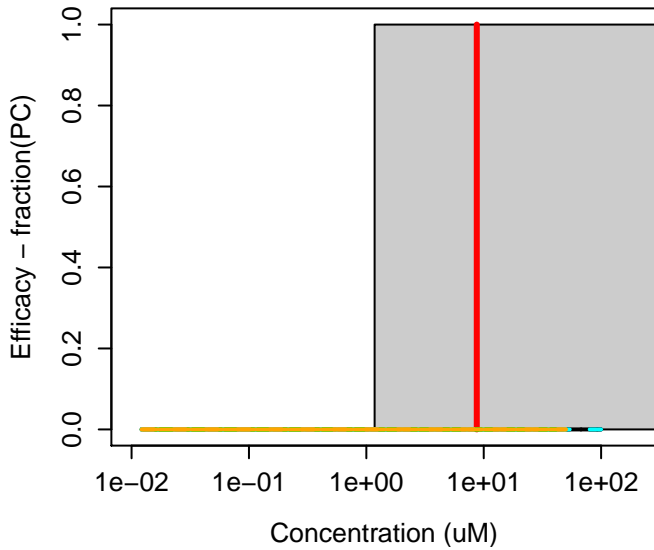

NOCAS\_47394 : Grinstad Soft-N-Safe  
Agonist: 0 Antagonist: 0

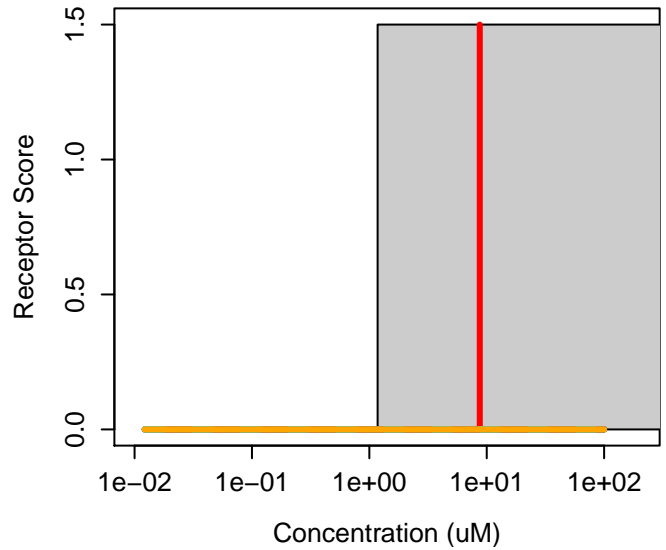

NOCAS\_47708 : Igepal CO-890

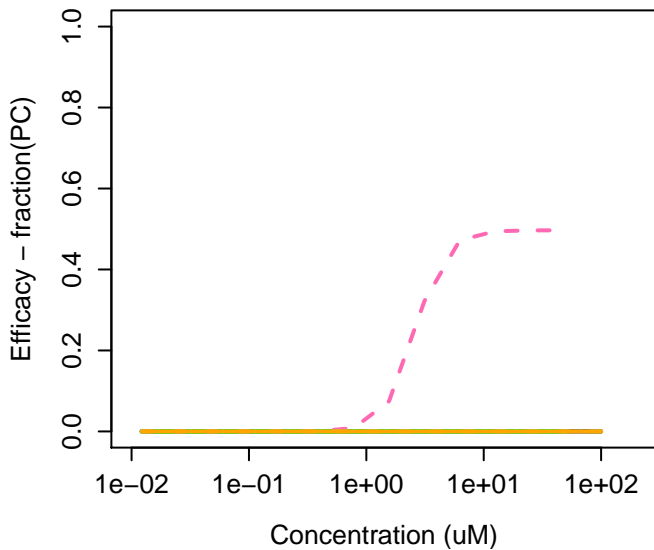

NOCAS\_47708 : Igepal CO-890  
Agonist: 0 Antagonist: 0

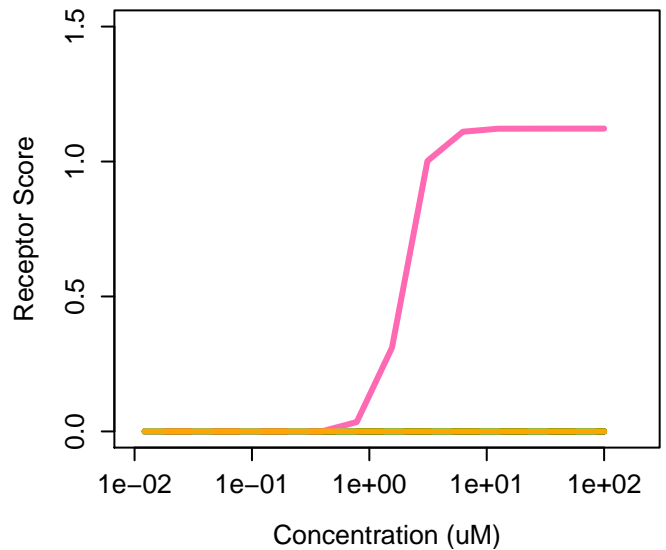

**NOCAS\_47796 : Formalin**



**NOCAS\_47796 : Formalin  
Agonist: 0 Antagonist: 0**



**oxaldehyde, 1-acetyl-9-(acetyloxy)-8-[[aminocarboxaldehyde, 1-acetyl-9-(acetyloxy)-8-[[aminocarbo  
Agonist: 0 Antagonist: 0.07**

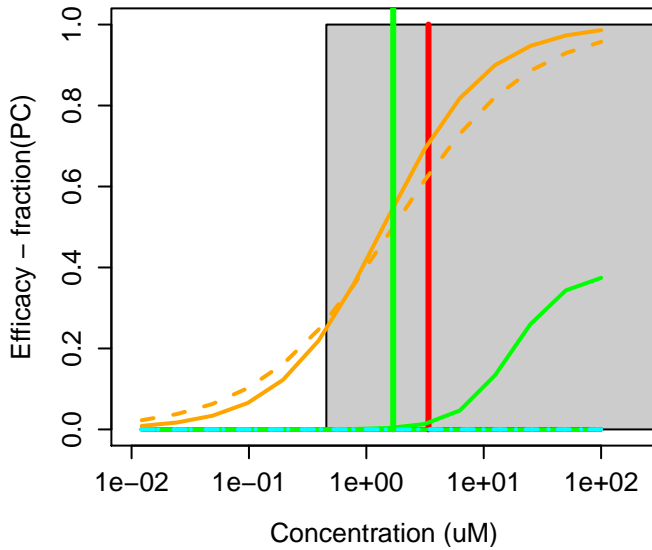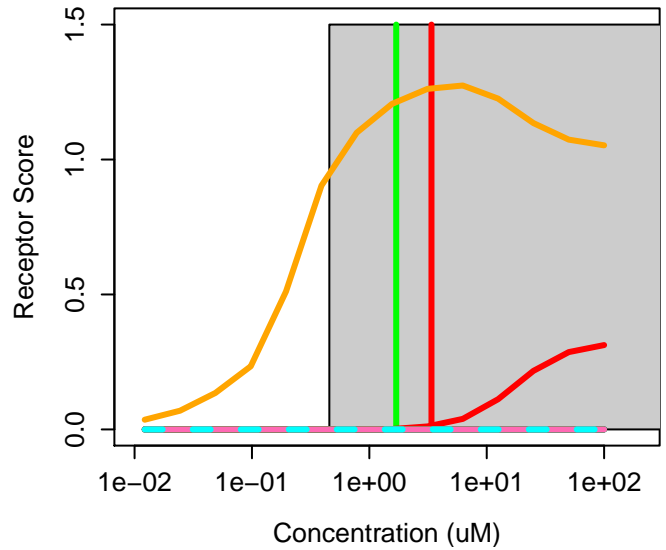

**NOCAS\_48172 : PharmaGSID\_48172**

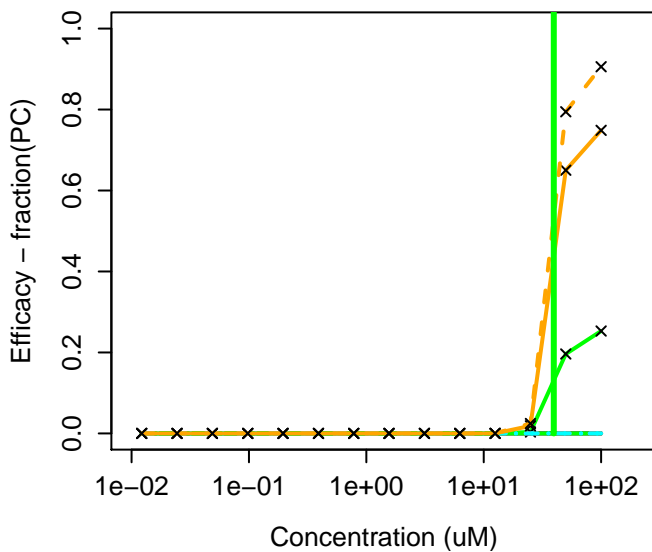

**NOCAS\_48172 : PharmaGSID\_48172  
Agonist: 0 Antagonist: 0.027**

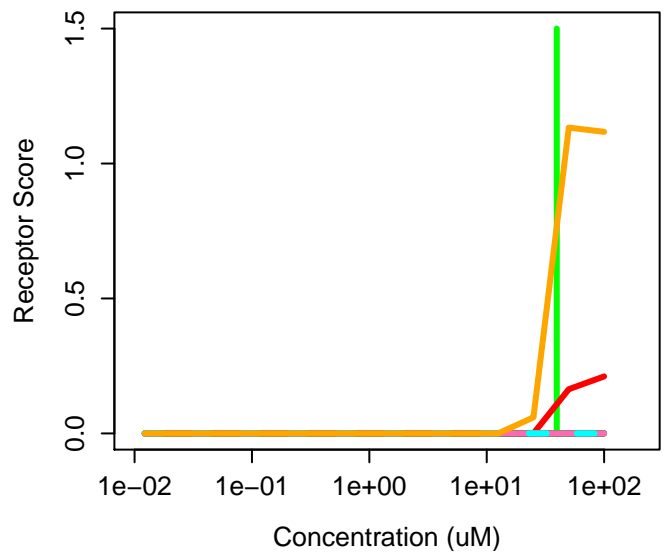



**NOCAS\_48176 : YM218**

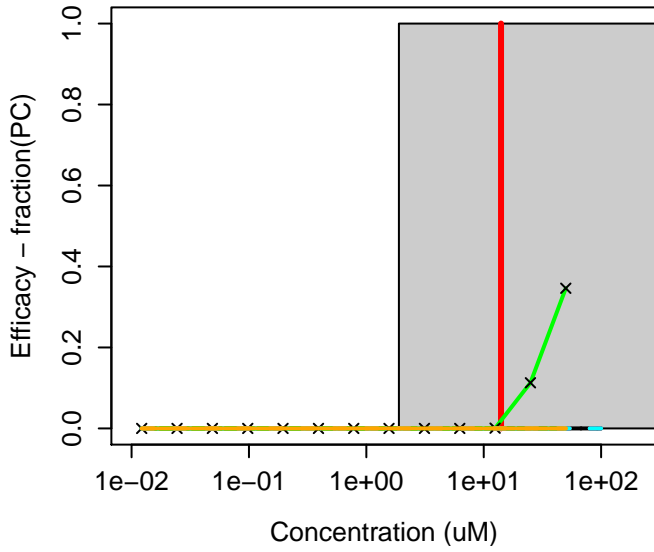

**NOCAS\_48176 : YM218**  
**Agonist: 0 Antagonist: 0**

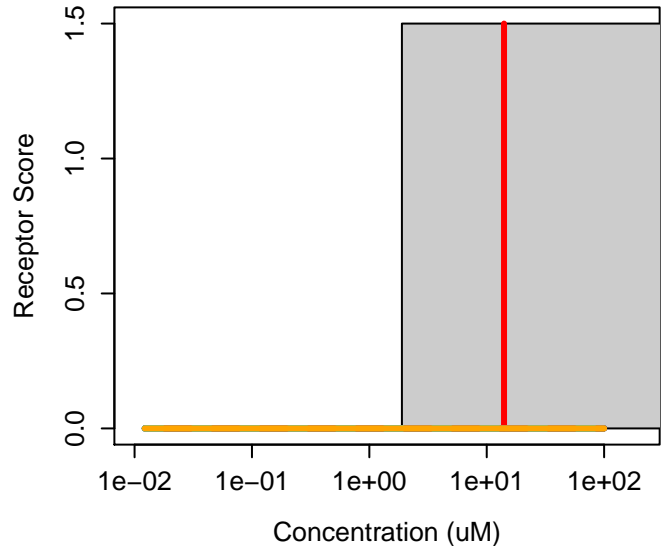

**NOCAS\_48505 : PharmaGSID\_48505**

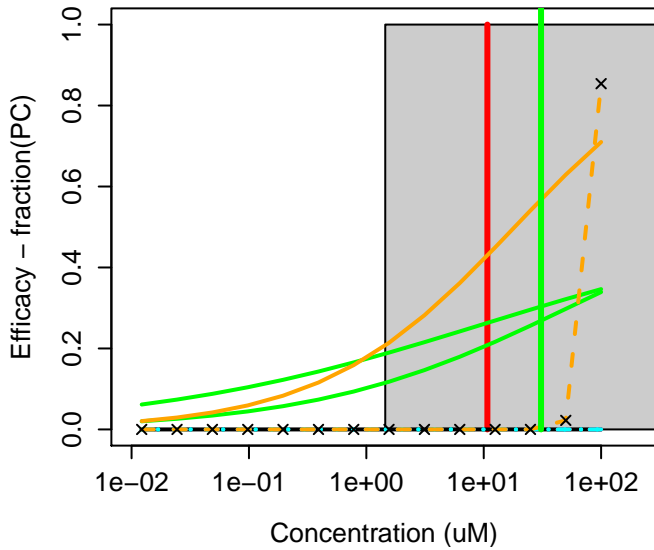

**NOCAS\_48505 : PharmaGSID\_48505**  
**Agonist: 0 Antagonist: 0.14**

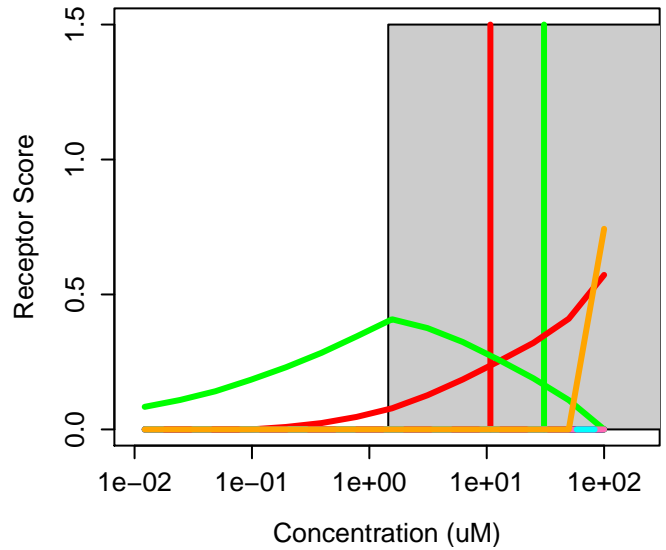

**NOCAS\_48507 : PharmaGSID\_48507**

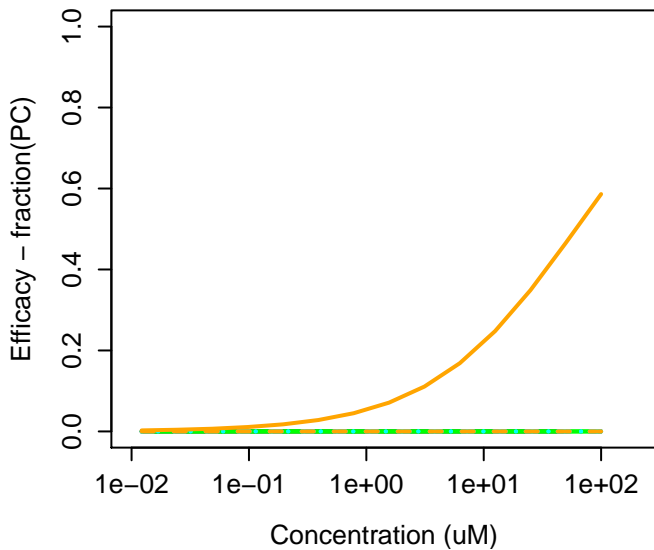

**NOCAS\_48507 : PharmaGSID\_48507**  
**Agonist: 0 Antagonist: 0**



**NOCAS\_48509 : PharmaGSID\_48509**

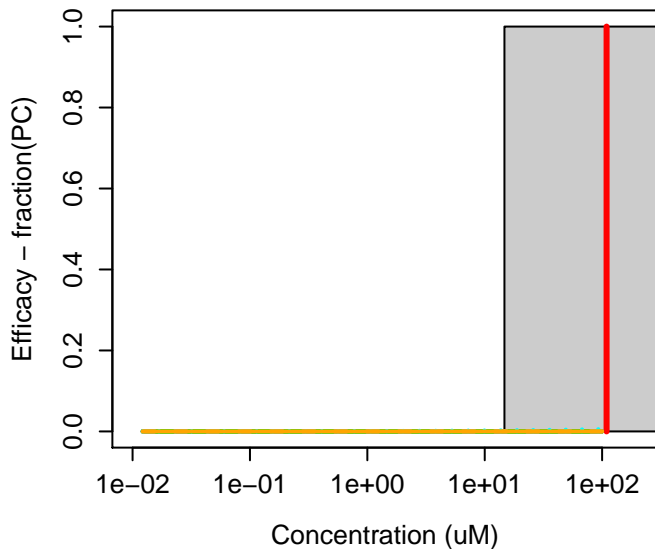

**NOCAS\_48509 : PharmaGSID\_48509**  
**Agonist: 0 Antagonist: 0**

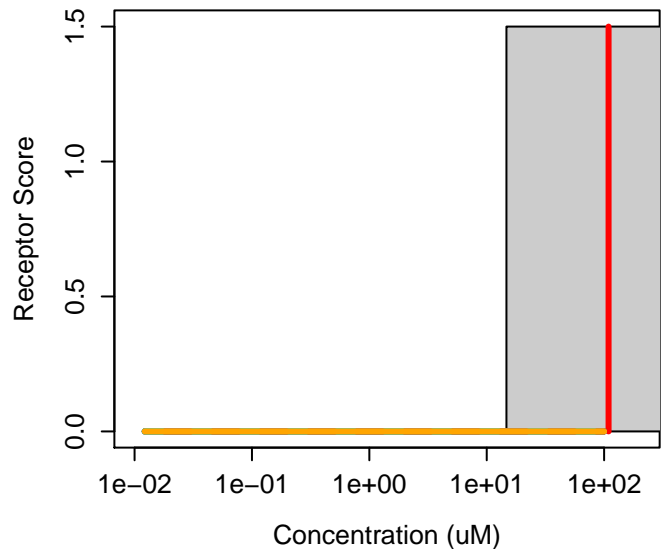

**NOCAS\_48514 : PharmaGSID\_48514**

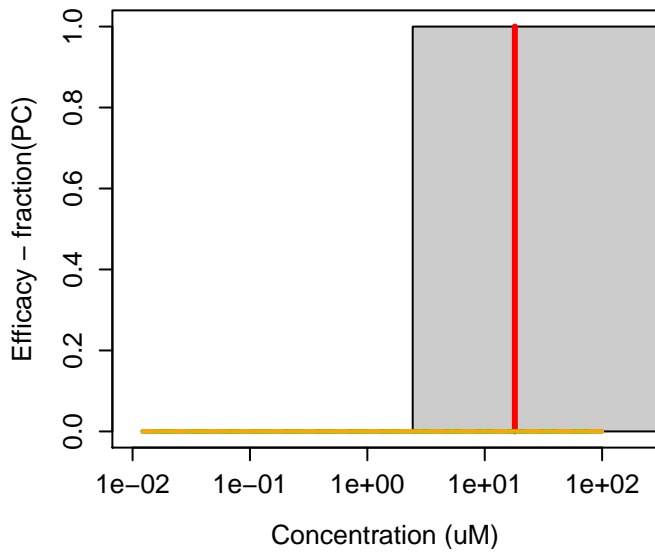

**NOCAS\_48514 : PharmaGSID\_48514**  
**Agonist: 0 Antagonist: 0**

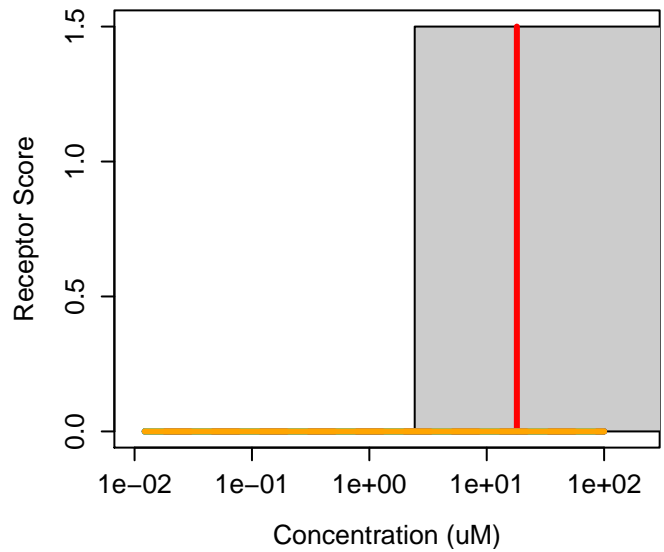

**NOCAS\_48516 : PharmaGSID\_48516**

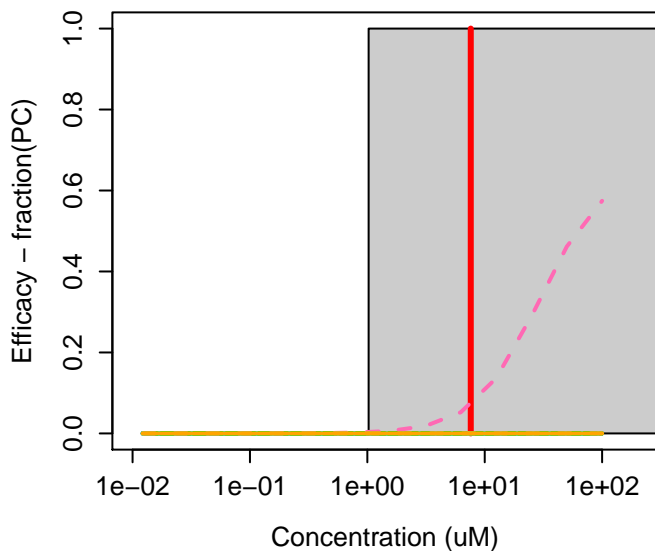

**NOCAS\_48516 : PharmaGSID\_48516**  
**Agonist: 0 Antagonist: 0**

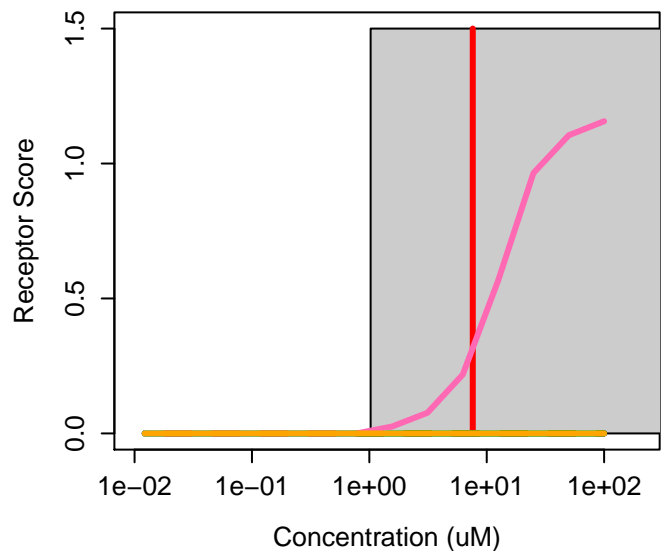

NOCAS\_48518 : PharmaGSID\_48518

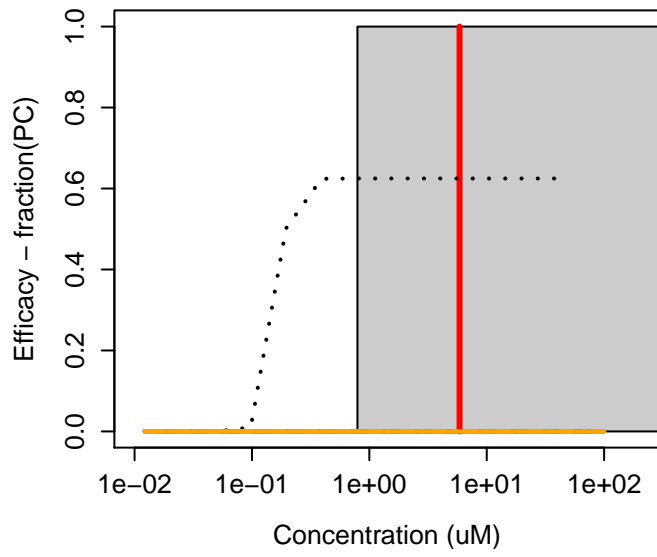

NOCAS\_48518 : PharmaGSID\_48518  
Agonist: 0 Antagonist: 0

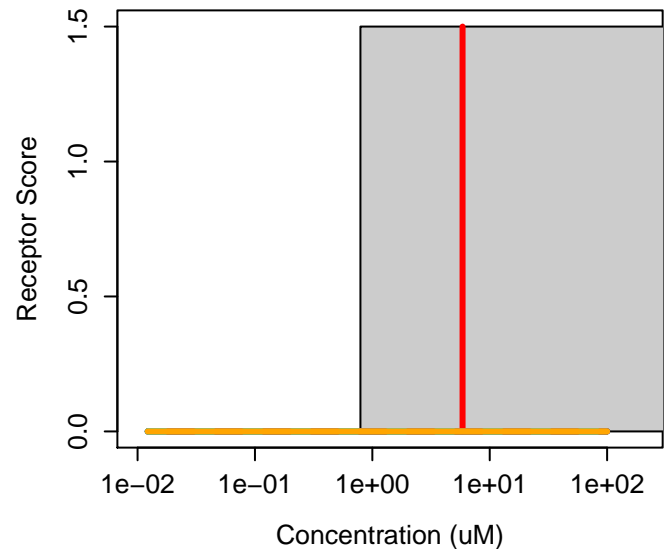

Supplement: tx6b00347_si_005.pdf [file tx6b00347_si_005.pdf]
